# Supplementary material for: A genome engineering resource to uncover principles of cellular organization and tissue architecture by lipid signaling
Source: eLife. 2020 Dec 15;9:e55793. doi: 10.7554/eLife.55793 (PMC7771963; doi:10.7554/eLife.55793)
Supplement: Supplementary file 1. — The table indicates the CG numbers, gene names and what chromosome each of the genes are located on. For the phosphoinositide binding proteins, the various phosphoinositides either established or predicted to bind each protein have been listed. The table also has the closest human orthologs and associated human diseases from the Online Mendelian Inheritance in Man (OMIM) database indicated. The sequences of gRNA one and gRNA two for each gene are listed along with the size of the genomic deletion expected from these gRNA combinations, and the actual size of genomic deletion obtained in flies when crossed to Act5c-Cas9. The phenotypes obtained when these genes were deleted specifically in the eye and the efficiency (in terms of absolute numbers of flies with deletion as compared to total number of F2 flies) of whole fly gene knockout generation using either Vasa-Cas9, Act5c-Cas9 or Nos-Cas9 has been mentioned. [file elife-55793-supp1.xlsx]

## Sheet: Sheet1
CG number	Gene name (as in FlyBase)	Gene present on chromosome	Binding lipids	Closest human ortholog	OMIM	gRNA 1 sequence	gRNA 2 sequence	Dual-gRNA transgene inserted on chromosome	Expected size of genomic deletion (b)	Actual size of genomic deletion in flies	Phenotype with eyGal4; UAS-Cas9-T2A-eGFP	Whole fly knockouts generated using	Efficiency of knockout generation F2
PI kinases
CG2699	Pi3K21B (Dp60)	2L		PIK3R3	Immunodeficiency 36; SHORT syndrome; Agammaglobulinemia 7; Megalencephaly-polymicrogyria-polydactyly-hydrocephalus syndrome 1	CATCGTCGAGTAGTGGAGCGGGG	GCGATGTGCTGAAGTTGGAGGG	3	3591	3595	reduced eye size	Vasa-Cas9	12 out of 32	Homozygous viable
CG2929	Pi4KIIα	3R		PI4K2A		ACGGCCAGGCATTGCTAAGGGGG	TGCCAGCGGTGATTGTCGAGCGG	2	1303	857	no defect	Nos-Cas9	14 out of 110	Homozygous viable
CG3682	PIP5K59B	2R		PIP5K1A	Lethal congenital contractural syndrome 3	GGACAGCTCCTCGGCGTCTCAGG	TCCACGATACCCGAGAGCGACGG	3	2572	2597	no defect	Act5c-Cas9	0 out of 98, positives seen in F1
CG4141	Pi3K92E (Dp110)	3R		PIK3CD	Immunodeficiency 14; Cowden syndrome 5; multiple cancers	TCAAATAGTCATGAACATGATGG	AGTTGTGCGAGGCCCAGTTAAGG	2	3728	3739	highly reduced eye	Vasa-Cas9	3 out of 118	Homozygous lethal
CG5373	Pi3K59F (Vps34)	2R		PIK3C3		TATGTAGCGGAAATGGTCGTCGG	TATCGCTCTCGAGCCCGACAAGG	3	3067	3067	crumbled	Act5c-Cas9	7 out of 73	Homozygous viable
CG6355	fab1	2R		PIKFYVE	Corneal fleck dystrophy	TTCCACATCGGCAATCTCAGCGG	CTTTCAATTGTCATGAGCAGCGG	2	5808	5808	no defect	Vasa-Cas9	11 out of 40
CG7004	fwd	3L		PI4KB		GAATGGCACTGCTCCGGTGGAGG	CTAATGGCATATTGTGAGAACGG	2	7579	7586	no defect	Nos-Cas9	6 out of 14	Homozygous viable
CG9985	sktl	2R				GAACTGGAACTGGAGCCGGTTGG	ACATCCTGCCCGCCCTTCGGCGG	2	2202	Only point mutant made	no defect	Nos-Cas9	132 out of 141	Homozygous lethal
CG10260	PI4KIIIα	X		PI4KA	Polymicrogyria, perisylvian, with cerebellar hypoplasia and arthrogryposis	TCGAAACGAACGAACGGAGGAGG	TTTCCAGTTGGGACTAAATGGGG	2	8395	8395	no defect	Vasa-Cas9	8 out of 22
CG11621	Pi3K68D	3L		PIK3C2A	Oculoskeletodental syndrome	ATGCTGCTCTAGACTCAGGGCGG	GATGCGTTTCACCCCAGACGAGG	2	7164	7171	no defect	Vasa-Cas9	7 out of 60	Homozygous viable
CG17471	PIP4K	4		PIP4K2B		CATATCTGAATTTATCGATAAGG	TCGTCCAAAAGATGATCATCTGG	2	4413	4565	no defect	Nos-Cas9	13 out of 20	Homozygous viable
PI phosphatases
CG3530		2R		MTMR7/8		TTGTGGCTCGTTTTCACGTGAGG	AGGCAAGGCAGGCAGGATCGAGG	2	6984	6998	no defect	Vasa-Cas9	5 out of 65
CG3573	Ocrl	X		INPP5B	Lowe syndrome; Dent disease 2	GAGGAGAATCCGACTTGGCGGGG	CTCGGGATCTGGGACCCGGGCGG	2	3444	3444	no defect	Nos-Cas9	4 out of 14	Homozygous lethal
CG3632		X		MTMR4		TCCGATAATTGGACAGGGCGAGG	CAATGTCCAGGAGTACGCTGCGG	2	5136	5138	no defect	Vasa-Cas9	7 out of 44
CG5026		3L		MTMR9		TTCCATGGTGTCGCCCTCGGCGG	AAAATAAGTGTATATCATGCAGG	2	2317	2322	reduced eye size	Nos-Cas9	8 out of 40	Homozygous viable
CG5671	Pten	2L		PTEN	Cowden syndrome 1; Lhermitte-Duclos syndrome; Macrocephaly; Prostate cancer	TCCAGCACCGGATAAACTAGAGG	CAGATCCACTTCCTTTCACGGGG	3	2394	2402	large eyes	Nos-Cas9	0 out of 17
CG6562	Synj	2R		SYNJ1	Epileptic encephalopathy, early infantile, 53; Parkinson disease 20, early-onset	TGCTCCAGTAATACGCTGTGCGG	TGACCCCGACGTGGGGCAGGTGG	2	3120	3127	no defect	Nos-Cas9	30 out of 43	Homozygous viable
CG6707		3L		PIP4P1		TTGATCAGGCTTTGTCGCTCTGG	CAATGTAAAGCTAAAGCACGGGG	2	2289	2293	no defect	Vasa-Cas9	16 out of 96	Homozygous lethal
CG7956		3R		INPP5F		AGCGGGACAAGAGTTTGTGGTGG	CGCCTAGTGACCTTCTTACAAGG	2	6481	6495	no defect	Nos-Cas9	15 out of 36	Homozygous viable
CG9115	mtm	2L		MTMR2	Charcot-Marie-Tooth disease, type 4B1; Myotubular myopathy, X-linked	CTTGTCGGCCAGGCTCGCGGAGG	ATACTATTAGTGCATAGGCGAGG	3	1891	1836	no defect	Nos-Cas9	15 out of 49	Homozygous lethal
CG9128	Sac1	3L		SACM1L		CCCGGAAATCATGGACAGCAGGG	GCCGTAGTGCAGGATGCCCGTGG	2	1699	1698	small crumbled eyes	Vasa-Cas9	0 out of 24, positives seen in F1
CG9784	Phosphoinositide 5-phosphatase	X		INPP5K	Muscular dystrophy, congenital, with cataracts and intellectual disability	AGCAACAATGAGCCAAACGGAGG	GCACGGCTCGCCCCATCGGACGG	2	1495	1496	no defect	Nos-Cas9	19 out of 38
CG10426	INPP5E	3L		INPP5E	Joubert syndrome 1; Mental retardation, truncal obesity, retinal dystrophy, and micropenis	GAACCGAGCTCATTGTGCGATGG	TAGATTTCAACGTGGGTGGGCGG	2	2543	2551	no defect	Nos-Cas9	2 out of 26
CG17840	FIG4	2L		FIG4	Charcot-Marie-Tooth disease, type 4J; Polymicrogyria, bilateral temporooccipital; Amyotrophic lateral sclerosis 11; Yunis-Varon syndrome	CAAGTCGGTCTATGGTCAGGAGG	CTCTTGCGAGGAACGACCGGCGG	3	2385	2395	no defect	Vasa-Cas9	0 out of 19
CG42271		X		INPP4A		CGTTCAACTCTGACTGTGGGCGG	GCCAGTTGGTAGTTACGGCAAGG	2	4943	4942	no defect	Vasa-Cas9	0 out of 41, positives seen in F1 crosses
Phospholipases
CG3620	norpA	X		PLCB4	Auriculocondylar syndrome 2	AACGGAAACGGAAGCGTCAGCGG	TTTATGTATATGTCTTATGCCGG	2	12933	12946	no defect	Act5c-Cas9	0 out of 13 (positives seen in F1 crosses)
CG4200	small wing (PLCg)	X		PLCG1	Autoinflammation, antibody deficiency, and immune dysregulation syndrome; Familial cold autoinflammatory syndrome 3	ACCATTGGTATGCTGGAGCGCGG	AAATGTTACCGCACCGTAAGAGG	2	4132	4138	no defect	Vasa-Cas9	46 out of 103	Homozygous lethal
CG4574	Plc21C	2L		PLCB1	Epileptic encephalopathy, early infantile, 12; Nail disorder, nonsyndromic congenital, 3, (leukonychia)	TAGAGGATCTCGTTCAGGCGGGG	TCTCACTCTAAATCTGGACGCGG	3	8935	8939	no defect	Vasa-Cas9	3 out 25	Homozygous viable
PI transfer proteins
CG5269	vibrator	3R		PITPNB		TCAAAGGAGAATACGGGTGGCGG	CGGCAGGTGGGCGAGGTGCGGGG	2	1542	1546	reduced eye size	Nos-Cas9	0 out of 4. 46 crosses were sterile out of 50
CG11111	rdgB	X		PITPNM2	Cone-rod dystrophy 5	CGACAAGGACCCAAGTCACGCGG	AGTTCAACCAACCAAGTGAGAGG	2	8820	8826		Vasa-Cas9	12 out of 39	Homozygous viable
CG17818	rdgBb	2R		PITPNC1		GCGCCACAGTCTGGAGCAATCGG	ATAGTACCTTCAAGGCCTCGCGG	2	1926	2110
PI3P binding proteins
CG14001	blue cheese	2L	PI3P	WDFY3	Microcephaly 18, primary, autosomal dominant	AAGCACTTCACTAAAGTAGAGGG	AAGCCGGTCAGGGTGTGCCAGG	3	10753	11003	no defect
CG4030	Rabaptin-5	2R	PI3P	RABEP1		GCAGCTGAGTAGAAATGCAGCGG	GATGGGCTCTTGAATGCCGGAGG	3	4349	4356	no defect	Vasa-Cas9	0 out of 10 F1s
CG15667	Sara	2R	PI3P	ZFYVE16		GCAGCTGAGTAGAAATGCAGCGG	GATGGGCTCTTGAATGCCGGAGG	3	4354	4369	no defect
CG2903	Hrs	2L	PI3P	HGS		CTCCAGACGCAAGTGACTGGTGG	GGTCCCGGTTCGTTTTGCGGCGG	3	2614	2631	rough eyes	Nos-Cas9	2 out of 17	Homozygous lethal
CG11807		2R	PI3P	NISCH		TCGACCAAATCTCAGGGAAGCGG	ATCTTACCTCTAGGGCTGAAAGG	3	524	526	no defect	Act5c-Cas9	21 out of 67	Homozygous viable
CG3860		2R	PI3P	OSBPL2	Deafness, autosomal dominant 67	GGCCACGATGATTTCCCGCAAGG	GACGATTGGTTATACAGCGGGGG	3	1921	1925	no defect
CG14782	rush hour	X	PI3P	PLEKHF2		AGCGCCTATTATCGTCATGGTGG	TGGACGCTCGGTGTCACCTGGGG	2	891	909	no defect
CG41099		3R	PI3P	ANKFY1		GAAGATAAGGCCATTTCAAGGGG	ATTGTGTAGTAATTGATCCGTGG	2	2981	2923	no defect
CG8506	Rabenosyn-5 (EEA1)	2L	PI3P	RBSN		GCCAGTGGAGAGATACTAGAGGG	TGCTTAGGCCTCTGTGGGTGAGG	3	1570	1495	no defect
CG6410	Snx16	2R	PI3P	SNX16		ACAAGCAACGCTCTTTAAGAAGG	AGTAGACCTTCGCCAATCGGAGG	3	1253	1258	no defect	Nos-Cas9	20 out of 42	Homozygous viable
CG5734	Snx17	2L	PI3P	SNX17		TATGTTGTAGGCCGTGTAGGTGG	GTGGCCAACGGTGCGTTCGAGGG	3	1382	1387	no defect
CG32758	Snx27	x	PI3P	SNX27		AAGGGTAGCATTTAGCACGGAGG	TCCAGATAAGCCAGCACGTTGGG	2	1540	1750	no defect
CG6359	Snx3	3R	PI3P	SNX3/12		CTTCACGTTTAGGCGGCGGGTGG	CTGCCTGCATATGTTCCTGCAGG	2	1017	1020	no defect
CG6116	Uvrag	2L	PI3P	UVRAG		GTTCCGCAGTCGAAGTTGCTGGG	GACAAATAGAACGGCAGGTGGGG	3	1253	1116	small rough eyes
CG5168	Wdfy2	2l	PI3P	WDFY2		CCGAGATAAAACCAGCTCAGCGG	AGAAAGCGCCTGTTGACAGTGGG	3	1674	1581	no defect
CG7986	Atg18a	3L	PI3P	WIPI2	Intellectual developmental disorder with short stature and variable skeletal anomalies	CCCTTTCAGTTCCCTGGCCGTGG	TAATAAAGAGGCACGACCTGCGG	2	2111	2122	no defect	Nos-Cas9	13 out of 35	Homozygous lethal
PI4P binding proteins
CG9113	AP-1γ	X	PI4P	AP1G1		CACCTGCGATTGTTCTCCGGCGG	GCAGCAGGTGGAACAGACGGAGG	2	7296	7296	slightly smaller eyes
CG7207	cert	3L	PI4P	COL4A3BP (CERT1)	Mental retardation, autosomal dominant 34	GAGGATGGACACGAACGCTGGGG	GGGATACTCGCGCTTGTAGACGG	2	6267	6356	no defect
CG3002	Gga	X	PI4P	GGA1		GGCTCAATTATATTAACTGGGGG	ATGGGCGTGGCCGGGCGGAAGGG	2	2744	2744	no defect
CG7085	sauron	2L	PI4P	GOLPH3		CTCATAGAGCTTGGACTGCGAGG	AGAGGAGCGTAGAGGATCAGAGG	3	694	1016	no defect
CG2078	Myd88	2R	PI4P	MYD88	Macroglobulinemia, Waldenstrom, somatic; Pyogenic bacterial infections, recurrent, due to MYD88 deficiency	GGGCGGATTGGGATGGCGGTGGG	CTTCTTGCTCTCCGACGTGGTGG	3	3715	3722	no defect	Nos-Cas9	13 out of 53	Homozygous viable
CG6708	Osbp	3R	PI4P	OSPB2		TCCGTATGCGTTCCTCCGGCCGG	ATATGGCCTACCCTCTGCGGCGG	2	2349	2369	no defect
PI5P binding proteins
CG13398		2L	PI5P	FRS2		GGGTAGCTGATTTCAGCTGGTGG	AGCAGGAATAGGATTGGTGGAGG	3	1523	1523	no defect
PI(3,5)P2 binding proteins
CG8743	Trpml	3L	PI(3,5)P2	MCOLN3	Mucolipidosis IV	GCAACAAGCAATCGGGGGAGGGG	AAATGCCTTGAGATCGGTGGTGG	2	2727	2729	no defect
PI(4,5)P2 binding proteins
CG1063	Itpr	3R	PI(4,5)P2	ITPR1	Gillespie syndrome; Spinocerebellar ataxia 15; Spinocerebellar ataxia 29, congenital nonprogressive; Anhidrosis, isolated, with normal sweat glands; Diabetes, type 1, susceptibility to	AGAGTGCCGAATGTGTACAGTGG	AGACTCACTGAAACGGCAGGAGG	2	10899	10902	no defect	Nos-Cas9	12 out of 38	Homozygous lethal
CG2520	like-AP180	2R	PI(4,5)P2	PICALM	Leukemia, acute myeloid, somatic	TGGCGAGTCCTTGGCCCGCAAGG	GGACAGCCAAGTATGATGGGGGG	2	10889	10891	no defect	Vasa-Cas9	8 out of 41	Homozygous lethal
CG4032	Abl	3L	PI(4,5)P2	ABL2	Congenital heart defects and skeletal malformations syndrome; Leukemia, Philadelphia chromosome-positive, resistant to imatinib	GACAGGGGCGCCCACTCGGGAGG	TCCAACCACACCATCCCCCGTGG	2	24460	24472	rough eyes	Nos-Cas9	27 out of 46	Homozygous lethal
CG4254	twinstar	2R	PI(4,5)P2	CFL2/DSTN	Nemaline myopathy 7, autosomal recessive	TGTCTGCAAGACTACATACGAGG	CTCCTCGACGGCTTCCCGGGAGG	2	536	629	no defect	Nos-Cas9	0 out of 48
CG6948	Clathrin light chain (Clc)	3L	PI(4,5)P2	CLTB		CAAGGAGGACGTGGATCCGGCGG	CTTCAATCCCAAGGTGAACAAGG	2	532	110	rough eyes	Nos-Cas9	2 out of 10 in F1
CG7057	AP-2μ	3R	PI(4,5)P2	AP2M1	Intellectual developmental disorder 60 with seizures	CGTCTACAACCACAAGGGCGAGG	GATAATCTTGCTCCGTGATGGGG	2	1423	1147	pupal lethality	Nos-Cas9	0 out of 9
CG7127	Exocyst 70	3L	PI(4,5)P2	EXOC7		GGCGCACAATAAATTGGAGAAGG	CGGGTATGGAGATGCCCCGCTGG	2	3564	3571	no defect	Nos-Cas9	2 out of 52
CG8532	liquid facets (Epsin)	3L	PI(4,5)P2	EPN1		AACCCGTTTAGTAGGATAGGGGG	AGCAAAATAACAACATGCCGTGG	2	3708	3711	rough eyes	Vasa-Cas9	4 out of 46
CG8604	Amphiphysin	2R	PI(4,5)P2	AMPH/BIN1	Centronuclear myopathy 2	AACTACATAAGATGTGTTCGCGG	AAGGAGGGCACCAACGAGAAGGG	3	4005	4007	no defect	Act5c-Cas9	11 out of 46	Homozygous lethal
CG9012	Clathrin heavy chain	X	PI(4,5)P2	CLTC	Mental retardation, autosomal dominant 56	TCATCTTTACTACTACAGTGAGG	GAACGAGGCTCAGCGCGAGAAGG	2	5734	5754	pupal lethality	Nos-Cas9	13 out of 39
CG9446	Coronin	2R	PI(4,5)P2	CORO1C	Immunodeficiency 8	GCCATTATCGTAGAGTCGGCGGG	ACTGAACTGATAAAAATGGGCGG	2	3702	3701	rough eyes
CG9579	Annexin B10	X	PI(4,5)P2	ANXA5/6	Pregnancy loss, recurrent, susceptibility to, 3; Amytrophic lateral sclerosis 23	GAAGAGCCACAAGGAACCCAAGG	CGATCAGCGTGAGCAGGCGGCGG	2	826	838	patchy pigmentation	Vasa-Cas9	8 out of 34	Homozygous viable
CG9968	Annexin B11	X	PI(4,5)P2	ANXA7/11	Amytrophic lateral sclerosis 23	TGAGGATGCATTTGGGACGATGG	GGAGCGCTGTTCACCCACCAGGG	2	1772	1795	patchy pigmentation	Vasa-Cas9	13 out of 19
CG10540	capping protein alpha	2R	PI(4,5)P2	CAPZA1/2		TAGAACCCTAGGAACCGGAGGGG	GAAGACGCAATAAGACCAGGAGG	2	1108	1173	patchy pigmentation	Nos-Cas9	10 out of 36	Homozygous lethal
CG10701	Moesin	X	PI(4,5)P2	MSN	Immunodeficiency 50; Deafness, autosomal recessive 24	GATTCGATTCTGTTGTCCAGCGG	CATCGCGAGAACGTTCGCCAGGG	2	4684	4684	patchy pigmentation
CG14296	Endophilin A	3R	PI(4,5)P2	SH3GL3	Leukemia, acute myeloid	GAGAAGATGGGCGGTGCCGAGGG	GCAGTCGTATGTTCAGGTGCAGG	2	1010	1007	patchy pigmentation	Nos-Cas9	6 out of 53	Homozygous lethal
CG15015	Cip4	3L	PI(4,5)P2	TRIP10		TTGCAACTCCGGACTCGCTGAGG	AACTCCAATGGCTGGGACGAGGG	2	21345	21345	patchy pigmentation	Vasa-Cas9	9 out of 38	Homozygous lethal
CG17158	capping protein beta	2L	PI(4,5)P2	CAPZB		GTGCTTTGGATCTGATGCGGAGG	CATGAAGCAGGACCTCGCAGCGG	3	749	752	patchy pigmentation	Vasa-Cas9	8 out of 18	Homozygous viable
CG18102	shibire	x	PI(4,5)P2	DNM1	Epileptic encephalopathy, early infantile, 31; Centronuclear myopathy 1; Charcot-Marie-Tooth disease, axonal type 2M and dominant intermediate B; Lethal congenital contracture syndrome 5	GGATCTGCCGCAGATCGCGGTGG	TATGTGCCGGAGAGTATGCGTGG	2	12752	12854	no defect	Nos-Cas9	Sterile crosses
CG31158	Efa6	3R	PI(4,5)P2	PSD/PSD2/PSD3		AAAGGATTAATCACGCCCAGGGG	ACAAAAAACGGGTTGTCGGATGG	2	18773	1576	no defect
CG32434	schizo	3L	PI(4,5)P2	IQSEC1	Mental retardation, X-linked 1/78	TTCAAGATTTATGCACTAGGCGG	CTGTTGCTGCAACATGTAGGCGG	2	6379	6383	no defect	Nos-Cas9	2 out of 36	Homozygous lethal
CG33653	Cadps	4	PI(4,5)P2	CADPS		AGGAATGTTTGATCCTACGACGG	TCTACATCTAATATACCAAGGGG	2	37686	37685	no defect	Nos-Cas9	7 out of 31
CG44159	Irk1	3R	PI(4,5)P2	KCNJ2	Andersen syndrome; Atrial fibrillation, familial, 9; Short QT syndrome 3	CGATAAAAAAGAACAGCATGAGG	GCTGCCAGCGGACCCGGAGGAGG	2	2585	2609	no defect
PI(3,4,5)P3 binding proteins
CG11628	steppke	2L	PI(3,4,5)P3	CYTH1/3		GTCCATTGCGCTAATCATCGCGG	GTACCGCATGTCCGCTGCCACGG	3	15546	15546	rough eyes
PI binding proteins with degenerate specificity
CG2092	scraps	2R	PI5P, PI(3,4)P2, PI(4,5)P2, PI(3,4,5)P3	ANLN	Focal segmental glomerulosclerosis 8	GACCCGTTTACTCAGGTACGAGG	ACAAAATTGCAATGGGTCAGCGG	3	4521	4575	reduced eye size
CG11926	Mon1	2L	PI3P, PI4P, PI5P	MON1A		TGCGAGTATCTAGACGCAGAGGG	GCTGATCAAGTGGATCGAGAAGG	3	1597	1644	no defect
CG10538	CdGAPr	2L	PI3P, PI4P, PI5P	ARHGAP32/33	Adams-Oliver syndrome 1	TTCCCATGCCCTGGCGTCGGCGG	AATTGTGATACCAGTAATGGTGG	3	5486	5494	no defect	Act5c-Cas9	7 out of 55
CG8552	PAPLA1	2L	PI3P, PI4P, PI5P	DDHD2	Spastic paraplegia 54, autosomal recessive; Spastic paraplegia 28, autosomal recessive	TAACTTGAATACCAGCAGCGAGG	TCGATGGTCATTGAGGACTGCGG	3	6003	6049	no defect
CG6760	Peroxin 1	3L	PI3P, PI4P, PI5P	PEX1	Heimler syndrome 1; Peroxisome biogenesis disorder 1A (Zellweger); Peroxisome biogenesis disorder 1B	CACTAAACTTCTGCTCTCAGCGG	GATGGCGTTGAAGGACTGCAGGG	2	3280	3280	no defect
CG4114	expanded	2L	PI3P, PI4P	FRMD1		TCGGCATCTCCTTCTAACGGAGG	AATTGTTGGACAGGTAAAGGCGG	3	3785	3919	reduced eye size
CG42250	lqfR	3R	PI4P, PI5P	CLINT1	You-Hoover-Fong syndrome	ATTCAATAGTCTCAAAATGGTGG	TTTTGTGGAATGCTTTGCTGCGG	2	6876	6872	no defect	Vasa-Cas9	2 out of 32	Homozygous viable
CG3779	numb	2L	PI3P, PI(4,5)P2	NUMBL		ACGCACGAACCACTCGAGCGCGG	GACTGCGCCGGCGCCTTGGGCGG	3	1916	1925	no defect	Act5c-Cas9	Sterile crosses
CG3715	Shc	3L	PI4P, PI(4,5)P2	SHC1		AATTCGGATATTACTCAAGGTGG	TCCGGTGCGAAGACCCCAGCAGG	2	1355	1357	slightly rough eyes	Nos-Cas9	17 out of 52	Homozygous lethal
CG32677	X11Lβ	X	PI4P, PI(4,5)P2	APBA1		GTGCGTAGTAGCCGCGTTGCTGG	GCTGGCCACTTCAGTGGGAGAGG	2	9603	9656	no defect
CG1513	ask	2R	PI3P, PI4P, PI5P, PI(3,5)P2, PI(4,5)P2	OSBPL9		GCCACCACTCCCGCTCTGGGGGG	AGTTCGACCAATCGTTGAGCAGG	3	7220	7217	no defect
CG9699	Septin 4	X	PI(4,5)P2, PI(3,4,5)P3	SEPT4	Spermatogenic failure 10	ATGGGCGCTACAGCGGCGGGGGG	GTAGGTAGATGCATATATGGCGG	2	9022	9044	no defect
CG44240	Trpm	2R	PI3P, PI4P, PI5P, PI(3,5)P2, PI(4,5)P2, PI(3,4,5)P3	TRPM3	Amyotrophic lateral sclerosis-parkinsonism/dementia complex, susceptibility to; Night blindness, congenital stationary (complete), 1C, autosomal recessive; Hypomagnesemia 1, intestinal; Erythrokeratodermia veriabilis et progressiva 6; Progressive familial heart block, type IB	GTGGCTCGACTTGACGAAGGCGG	CGATCTCGTCCTGCACCAGGTGG	3	29713	29723	no defect	Vasa-Cas9	10 out of 43	Homozygous viable
CG2774	Snx1	2L	PI3P, PI(3,5)P2	SNX2		ACACACGCGCGACTTCGCCGAGG	GTGTACGAATAAAGAGATAGAGG	3	1960	1974	no defect	Act5c-Cas9	5 out of 46	Homozygous viable
CG6757	SH3PX1	3L	PI(3,4)P2, PI(3,5)P2, PI(4,5)P2, PI(3,4,5)P3	SNX18		TTCGAGTCCTGTCTTCACAGGGG	GATTAAGTTTTACCAGGGCGTGG	2	2965	2963	patchy pigmentation
CG8282	Snx6	2L	PI(3,4)P2, PI(4,5)P2	SNX6		GAGCGAATTTCAACTAGAGGTGG	CAAAGAGATTGCCTGAGACGGGG	3	2299	2387	no defect
CG5658	Klp98A	3R	PI3P, PI(3,4)P2, PI(3,4,5)P3	KIF16B		TGGCGATGGGGGTGGCTACGCGG	CCAATCTACGAGGGACCCGGCGG	2	9569	9568	no defect
CG4006	Akt1	3R	PI(3,4)P2, PI(3,4,5)P3	AKT2	Diabetes mellitus, type II; Hypoinsulinemic hypoglycemia with hemihypertrophy; Megalencephaly-polymicrogyria-polydactyly-hydrocephalus syndrome 2; Cowden syndrome 6; Proteus syndrome, somatic; Schizophrenia, susceptibility to; multiple cancers	GCATGACCCGATGTAACGCTGGG	GTTCAGCTACCAAGGAGACATGG	2	1821	2115	small eyes
CG1210	Pdk1	3L	PI(3,4)P2, PI(3,4,5)P3	PDPK1		CAGTGTGTGCGTGTACGCGGTGG	GGGCGAATTGCTTGAGGAGGCGG	2	11263	11255	no defect	Vasa-Cas9	0 out of 11 F1
CG14991	Fermitin 1	3L	PI(3,4)P2, PI(3,4,5)P3	FERMT2	Kindler syndrome; Leukocyte adhesion deficiency, type III	GATCCGTGATGAGGATCCGCAGG	ATGTTCCACAAGCTGACGGGCGG	2	2076	2081	no defect	Act5c-Cas9	12 out of 33	Homozygous lethal
CG7729	Fermitin 2	3L	PI(3,4)P2, PI(3,4,5)P3		Kindler syndrome; Leukocyte adhesion deficiency, type III	GAGAAGACGATGCGCGTGCGCGG	CTTTTCCACAAACTTACCGGCGG	2	2054	1707	no defect	Nos-Cas9	1 out of 56
CG8176		3R	PI3P, PI4P, PI(3,4)P2, PI(3,5)P2, PI(4,5)P2	FCHO2		ATGCCCATGCATGCTGAGGACGG	CACCCACGCCTCCGTCGGTCGGG	2	5446		no defect
CG14228	Merlin	X	PI3P, PI4P, PI5P, PI(3,4)P2, PI(3,5)P2, PI(4,5)P2, PI(3,4,5)P3	NF2	Meningioma, NF2-related, somatic; Neurofibromatosis, type 2; Schwannomatosis, somatic	AAACCGATCCCTGTCGGTGCGGG	GAGGGGGGAGTAGGTGACGGAGG	2	2109	4311	large eyes
CG34399	NADPH oxidase	2R	PI3P, PI(4,5)P2	NOX5		TTTGGGTGAACGTGAGGGCGTGG	AAGGTCACCGTCTTCTACTGCGG	2	6495	6499	no defect
