# Supplementary material for: A genome engineering resource to uncover principles of cellular organization and tissue architecture by lipid signaling
Source: eLife. 2020 Dec 15;9:e55793. doi: 10.7554/eLife.55793 (PMC7771963; doi:10.7554/eLife.55793)
Supplement: Supplementary file 3. — The table shows chromosome location wise comparison between the isogenized attP40 stock with the reference genome. Average coverage for each sequence suggests the number of times each region has been sequenced. The frequency at which the variation is observed has been mentioned. A sequence quality of >Q30 score, which corresponds to >99.9% accuracy has been obtained. Each variation has been mapped based on genomic annotation of coding vs non-coding region. If variation in the coding region leads to amino-acid changes, it has been tabulated. [file elife-55793-supp3.xlsx]

## Sheet: 1D-adapter-06_R2 trimmed ma...
Mapping	Reference Position	Type	Length	Reference	Allele	Coverage	Frequency	Average quality	Overlapping annotations	Coding region change	Amino acid change
2L mapping	5092	SNV	1	C	T	29	93.1034	35	Misc. feature: contig 2L_1_1 1..50000(1)
2L mapping	5095	SNV	1	T	A	29	96.5517	35.7143	Misc. feature: contig 2L_1_1 1..50000(1)
2L mapping	5372	SNV	1	T	A	27	100	35.037	Misc. feature: contig 2L_1_1 1..50000(1)
2L mapping	5390	SNV	1	T	A	23	100	35.3913	Misc. feature: contig 2L_1_1 1..50000(1)
2L mapping	5403	SNV	1	C	G	23	100	33.5652	Misc. feature: contig 2L_1_1 1..50000(1)
2L mapping	5465	SNV	1	C	A	41	100	36.0976	Misc. feature: contig 2L_1_1 1..50000(1)
2L mapping	5598	SNV	1	C	G	36	100	35.4167	Misc. feature: contig 2L_1_1 1..50000(1)
2L mapping	5762	SNV	1	T	C	28	100	36.0714	Misc. feature: contig 2L_1_1 1..50000(1)
2L mapping	5904	SNV	1	C	A	39	100	36.2051	Misc. feature: contig 2L_1_1 1..50000(1)
2L mapping	5974	SNV	1	C	T	35	100	36.1143	Misc. feature: contig 2L_1_1 1..50000(1)
2L mapping	6353	SNV	1	C	T	50	100	35.4	Misc. feature: contig 2L_1_1 1..50000(1)
2L mapping	7039	SNV	1	A	T	50	100	35.54	Misc. feature: contig 2L_1_1 1..50000(1)
2L mapping	7088	SNV	1	A	T	43	97.6744	36.0238	Misc. feature: contig 2L_1_1 1..50000(1)
2L mapping	7556	SNV	1	T	C	49	97.9592	35.5417	Exon: Exon, Gene: FBgn0031208, Misc. feature: contig 2L_1_1 1..50000(1), mRNA: FBgn0031208, mRNA: FBgn0031208, mRNA: FBgn0031208
2L mapping	7902	SNV	1	A	G	25	100	34.64	CDS: FBgn0031208, CDS: FBgn0031208, CDS: FBgn0031208, Exon: Exon, Gene: FBgn0031208, Misc. feature: contig 2L_1_1 1..50000(1), mRNA: FBgn0031208, mRNA: FBgn0031208, mRNA: FBgn0031208	FBpp0289913:c.[223A>G]; FBpp0289914:c.[223A>G]; FBpp0303504:c.[223A>G]	FBpp0289913:p.[Asn75Asp]; FBpp0289914:p.[Asn75Asp]; FBpp0303504:p.[Asn75Asp]
2L mapping	8263	SNV	1	G	A	41	97.561	35.675	CDS: FBgn0031208, CDS: FBgn0031208, CDS: FBgn0031208, Exon: Exon, Exon: Exon, Exon: Exon, Gene: FBgn0031208, Misc. feature: contig 2L_1_1 1..50000(1), mRNA: FBgn0031208, mRNA: FBgn0031208, mRNA: FBgn0031208	FBpp0289913:c.[508G>A]; FBpp0289914:c.[508G>A]; FBpp0303504:c.[472G>A]	FBpp0289913:p.[Ala170Thr]; FBpp0289914:p.[Ala170Thr]; FBpp0303504:p.[Ala158Thr]
2L mapping	10589	Deletion	1	T	-	44	93.1818	35.6098	Exon: Exon, Exon: Exon, Gene: FBgn0002121, Misc. feature: contig 2L_1_1 1..50000(1), mRNA: FBgn0002121, mRNA: FBgn0002121, mRNA: FBgn0002121, mRNA: FBgn0002121, mRNA: FBgn0002121, mRNA: FBgn0002121, mRNA: FBgn0002121, mRNA: FBgn0002121, mRNA: FBgn0002121, mRNA: FBgn0002121, mRNA: FBgn0002121
2L mapping	10610	SNV	1	G	T	46	100	35.4348	Exon: Exon, Exon: Exon, Gene: FBgn0002121, Misc. feature: contig 2L_1_1 1..50000(1), mRNA: FBgn0002121, mRNA: FBgn0002121, mRNA: FBgn0002121, mRNA: FBgn0002121, mRNA: FBgn0002121, mRNA: FBgn0002121, mRNA: FBgn0002121, mRNA: FBgn0002121, mRNA: FBgn0002121, mRNA: FBgn0002121, mRNA: FBgn0002121
2L mapping	12275	SNV	1	G	C	34	100	35.2941	Gene: FBgn0002121, Misc. feature: contig 2L_1_1 1..50000(1)	FBpp0297547:c.[2804+11C>G]; FBpp0077826:c.[2657+11C>G]; FBpp0077828:c.[2804+11C>G]; FBpp0297546:c.[2804+11C>G]; FBpp0297544:c.[2804+11C>G]; FBpp0077827:c.[2657+11C>G]; FBpp0297545:c.[2804+11C>G]; FBpp0077824:c.[2780+11C>G]; FBpp0077825:c.[2657+11C>G]; FBpp0077829:c.[2804+11C>G]; FBpp0303505:c.[2804+11C>G]
2L mapping	12460	SNV	1	T	C	32	100	35.7812	CDS: FBgn0002121, CDS: FBgn0002121, CDS: FBgn0002121, CDS: FBgn0002121, CDS: FBgn0002121, CDS: FBgn0002121, CDS: FBgn0002121, CDS: FBgn0002121, CDS: FBgn0002121, CDS: FBgn0002121, CDS: FBgn0002121, Exon: Exon, Gene: FBgn0002121, Misc. feature: contig 2L_1_1 1..50000(1), mRNA: FBgn0002121, mRNA: FBgn0002121, mRNA: FBgn0002121, mRNA: FBgn0002121, mRNA: FBgn0002121, mRNA: FBgn0002121, mRNA: FBgn0002…	FBpp0077825:c.[2483A>G]; FBpp0077826:c.[2483A>G]; FBpp0077824:c.[2606A>G]; FBpp0077827:c.[2483A>G]; FBpp0297545:c.[2630A>G]; FBpp0303505:c.[2630A>G]; FBpp0077828:c.[2630A>G]; FBpp0297544:c.[2630A>G]; FBpp0297547:c.[2630A>G]; FBpp0297546:c.[2630A>G]; FBpp0077829:c.[2630A>G]	FBpp0077825:p.[His828Arg]; FBpp0077826:p.[His828Arg]; FBpp0077824:p.[His869Arg]; FBpp0077827:p.[His828Arg]; FBpp0297545:p.[His877Arg]; FBpp0303505:p.[His877Arg]; FBpp0077828:p.[His877Arg]; FBpp0297544:p.[His877Arg]; FBpp0297547:p.[His877Arg]; FBpp0297546:p.[His877Arg]; FBpp0077829:p.[His877Arg]
2L mapping	13247	SNV	1	C	T	45	100	36.0444	Gene: FBgn0002121, Misc. feature: contig 2L_1_1 1..50000(1)	FBpp0297544:c.[2161+273G>A]; FBpp0077829:c.[2161+273G>A]; FBpp0077826:c.[2014+273G>A]; FBpp0077827:c.[2014+273G>A]; FBpp0297545:c.[2161+273G>A]; FBpp0077825:c.[2014+273G>A]; FBpp0297546:c.[2161+273G>A]; FBpp0303505:c.[2161+273G>A]; FBpp0297547:c.[2161+273G>A]; FBpp0077828:c.[2161+273G>A]; FBpp0077824:c.[2137+273G>A]
2L mapping	13638	SNV	1	G	A	37	100	33.8919	Gene: FBgn0002121, Misc. feature: contig 2L_1_1 1..50000(1)	FBpp0297546:c.[2056-13C>T]; FBpp0077827:c.[1909-13C>T]; FBpp0077825:c.[1909-13C>T]; FBpp0297547:c.[2056-13C>T]; FBpp0077828:c.[2056-13C>T]; FBpp0303505:c.[2056-13C>T]; FBpp0077824:c.[2032-13C>T]; FBpp0297544:c.[2056-13C>T]; FBpp0297545:c.[2056-13C>T]; FBpp0077826:c.[1909-13C>T]; FBpp0077829:c.[2056-13C>T]
2L mapping	15806	SNV	1	T	C	57	100	33.9298	Gene: FBgn0002121, Misc. feature: contig 2L_1_1 1..50000(1)	FBpp0297547:c.[85-95A>G]; FBpp0297544:c.[85-95A>G]; FBpp0297546:c.[85-95A>G]; FBpp0077829:c.[85-95A>G]; FBpp0077824:c.[61-95A>G]; FBpp0303505:c.[85-95A>G]; FBpp0077828:c.[85-95A>G]; FBpp0297545:c.[85-95A>G]
2L mapping	16467	SNV	1	G	A	75	100	35.5333	Gene: FBgn0002121, Misc. feature: contig 2L_1_1 1..50000(1)	FBpp0297547:c.[84+586C>T]; FBpp0077829:c.[84+586C>T]; FBpp0077824:c.[61-756C>T]; FBpp0303505:c.[84+586C>T]; FBpp0077828:c.[84+586C>T]; FBpp0297545:c.[84+586C>T]; FBpp0297544:c.[84+586C>T]; FBpp0297546:c.[84+586C>T]
2L mapping	16483	SNV	1	T	A	88	38.6364	36.4706	Gene: FBgn0002121, Misc. feature: contig 2L_1_1 1..50000(1)	FBpp0077828:c.[84+570A>T]; FBpp0297544:c.[84+570A>T]; FBpp0297546:c.[84+570A>T]; FBpp0297547:c.[84+570A>T]; FBpp0077824:c.[61-772A>T]; FBpp0077829:c.[84+570A>T]; FBpp0297545:c.[84+570A>T]; FBpp0303505:c.[84+570A>T]
2L mapping	16722	Deletion	1	A	-	17	82.3529	33.7143	Gene: FBgn0002121, Misc. feature: contig 2L_1_1 1..50000(1)	FBpp0297547:c.[84+331delT]; FBpp0077828:c.[84+331delT]; FBpp0077824:c.[61-1011delT]; FBpp0077829:c.[84+331delT]; FBpp0297544:c.[84+331delT]; FBpp0297546:c.[84+331delT]; FBpp0297545:c.[84+331delT]; FBpp0303505:c.[84+331delT]
2L mapping	17005	Deletion	4	AAAA	-	32	65.625	34.5714	Gene: FBgn0002121, Misc. feature: contig 2L_1_1 1..50000(1)	FBpp0297546:c.[84+45_84+48delTTTT]; FBpp0297545:c.[84+45_84+48delTTTT]; FBpp0077828:c.[84+45_84+48delTTTT]; FBpp0297544:c.[84+45_84+48delTTTT]; FBpp0297547:c.[84+45_84+48delTTTT]; FBpp0303505:c.[84+45_84+48delTTTT]; FBpp0077829:c.[84+45_84+48delTTTT]; FBpp0077824:c.[61-1297_61-1294delTTTT]
2L mapping	17243	SNV	1	T	A	28	100	36.7143	Gene: FBgn0002121, Misc. feature: contig 2L_1_1 1..50000(1)	FBpp0077824:c.61-1532A>T
2L mapping	17570	SNV	1	G	A	26	100	35.6538	Gene: FBgn0002121, Misc. feature: contig 2L_1_1 1..50000(1)	FBpp0077824:c.61-1859C>T
2L mapping	18354	SNV	1	T	C	71	47.8873	34.4412	Exon: Exon, Gene: FBgn0002121, Misc. feature: contig 2L_1_1 1..50000(1), mRNA: FBgn0002121, mRNA: FBgn0002121	FBpp0077824:c.60+1531A>G
2L mapping	18735	Deletion	3	ATA	-	80	72.5	34.5862	Gene: FBgn0002121, Misc. feature: contig 2L_1_1 1..50000(1)	FBpp0077824:c.60+1148_60+1150delTAT
2L mapping	18930	SNV	1	T	C	55	94.5455	34.6538	Gene: FBgn0002121, Misc. feature: contig 2L_1_1 1..50000(1)	FBpp0077824:c.60+955A>G
2L mapping	19088	SNV	1	C	T	44	100	34.9318	Gene: FBgn0002121, Misc. feature: contig 2L_1_1 1..50000(1)	FBpp0077824:c.60+797G>A
2L mapping	19802	SNV	1	C	T	39	87.1795	31.8824	Gene: FBgn0002121, Misc. feature: contig 2L_1_1 1..50000(1)	FBpp0077824:c.60+83G>A
2L mapping	19836	Insertion	1	-	A	40	67.5	35.4815	Gene: FBgn0002121, Misc. feature: contig 2L_1_1 1..50000(1)	FBpp0077824:c.60+49_60+50insT
2L mapping	20008	SNV	1	A	G	53	100	34.2264	Exon: Exon, Exon: Exon, Exon: Exon, Gene: FBgn0002121, Misc. feature: contig 2L_1_1 1..50000(1), mRNA: FBgn0002121, mRNA: FBgn0002121, mRNA: FBgn0002121, mRNA: FBgn0002121, mRNA: FBgn0002121, mRNA: FBgn0002121, mRNA: FBgn0002121, mRNA: FBgn0002121
2L mapping	20144	SNV	1	T	A	90	64.4444	35.3103	Gene: FBgn0002121, Misc. feature: contig 2L_1_1 1..50000(1)
2L mapping	20151	SNV	1	G	A	86	61.6279	35.8491	Gene: FBgn0002121, Misc. feature: contig 2L_1_1 1..50000(1)
2L mapping	20242	SNV	1	A	G	91	98.9011	35.1889	Gene: FBgn0002121, Misc. feature: contig 2L_1_1 1..50000(1)
2L mapping	20382	Insertion	4	-	GCAA	17	58.8235	36.225	Gene: FBgn0002121, Misc. feature: contig 2L_1_1 1..50000(1)
2L mapping	20546	SNV	1	T	C	110	48.1818	34.1887	Gene: FBgn0002121, Misc. feature: contig 2L_1_1 1..50000(1)
2L mapping	20682	SNV	1	T	A	87	50.5747	35.25	Gene: FBgn0002121, Misc. feature: contig 2L_1_1 1..50000(1)
2L mapping	21487	SNV	1	C	T	10	100	37	Misc. feature: contig 2L_1_1 1..50000(1)
2L mapping	21685	SNV	1	T	A	11	100	34.5455	Misc. feature: contig 2L_1_1 1..50000(1)
2L mapping	21688	SNV	1	C	T	11	100	37	Misc. feature: contig 2L_1_1 1..50000(1)
2L mapping	21690	SNV	1	T	C	11	100	34	Misc. feature: contig 2L_1_1 1..50000(1)
2L mapping	22141	SNV	1	T	A	36	100	34.6667	Misc. RNA: FBgn0263584, CDS: FBgn0031209, Exon: Exon, Exon: Exon, Gene: FBgn0031209, Gene: FBgn0263584, Misc. feature: contig 2L_1_1 1..50000(1), mRNA: FBgn0031209	FBpp0111921:c.2307A>T
2L mapping	24050	SNV	1	C	T	30	100	36.0667	Misc. RNA: FBgn0263584, CDS: FBgn0031209, Exon: Exon, Exon: Exon, Gene: FBgn0031209, Gene: FBgn0263584, Misc. feature: contig 2L_1_1 1..50000(1), mRNA: FBgn0031209	FBpp0111921:c.566G>A	FBpp0111921:p.Arg189His
2L mapping	24439	SNV	1	T	G	45	100	35.1333	Gene: FBgn0031209, Misc. feature: contig 2L_1_1 1..50000(1)	FBpp0111921:c.406-229A>C
2L mapping	24710	SNV	1	T	A	46	100	36.087	Gene: FBgn0031209, Misc. feature: contig 2L_1_1 1..50000(1)	FBpp0111921:c.405+37A>T
2L mapping	25350	Insertion	2	-	TT	28	75	35.0238	Misc. feature: contig 2L_1_1 1..50000(1)
2L mapping	25478	Insertion	1	-	T	100	40	36	Exon: Exon, Gene: FBgn0051973, Misc. feature: contig 2L_1_1 1..50000(1), mRNA: FBgn0051973, mRNA: FBgn0051973, mRNA: FBgn0051973, mRNA: FBgn0051973, mRNA: FBgn0051973, mRNA: FBgn0051973, mRNA: FBgn0051973, mRNA: FBgn0051973
2L mapping	25478	Deletion	1	T	-	105	43.8095	35.1522	Exon: Exon, Gene: FBgn0051973, Misc. feature: contig 2L_1_1 1..50000(1), mRNA: FBgn0051973, mRNA: FBgn0051973, mRNA: FBgn0051973, mRNA: FBgn0051973, mRNA: FBgn0051973, mRNA: FBgn0051973, mRNA: FBgn0051973, mRNA: FBgn0051973
2L mapping	25753	SNV	1	C	T	136	35.2941	35.25	Exon: Exon, Gene: FBgn0051973, Misc. feature: contig 2L_1_1 1..50000(1), mRNA: FBgn0051973, mRNA: FBgn0051973, mRNA: FBgn0051973, mRNA: FBgn0051973, mRNA: FBgn0051973, mRNA: FBgn0051973, mRNA: FBgn0051973, mRNA: FBgn0051973
2L mapping	26707	Deletion	1	T	-	49	91.8367	33.9556	Gene: FBgn0051973, Misc. feature: contig 2L_1_1 1..50000(1)	FBpp0301168:c.[5506-19delA]; FBpp0301166:c.[2509-19delA]; FBpp0112328:c.[2956-19delA]; FBpp0077821:c.[2953-19delA]; FBpp0301165:c.[5206-19delA]; FBpp0301164:c.[4522-19delA]; FBpp0077822:c.[5830-19delA]; FBpp0301167:c.[5386-19delA]
2L mapping	27181	SNV	1	A	G	41	100	34.3415	CDS: FBgn0051973, CDS: FBgn0051973, CDS: FBgn0051973, CDS: FBgn0051973, CDS: FBgn0051973, CDS: FBgn0051973, CDS: FBgn0051973, CDS: FBgn0051973, Exon: Exon, Gene: FBgn0051973, Misc. feature: contig 2L_1_1 1..50000(1), mRNA: FBgn0051973, mRNA: FBgn0051973, mRNA: FBgn0051973, mRNA: FBgn0051973, mRNA: FBgn0051973, mRNA: FBgn0051973, mRNA: FBgn0051973, mRNA: FBgn0051973	FBpp0112328:c.[2628T>C]; FBpp0301168:c.[5178T>C]; FBpp0301167:c.[5058T>C]; FBpp0077821:c.[2625T>C]; FBpp0077822:c.[5502T>C]; FBpp0301166:c.[2181T>C]; FBpp0301164:c.[4194T>C]; FBpp0301165:c.[4878T>C]
2L mapping	28813	SNV	1	A	G	42	100	32.9286	CDS: FBgn0051973, CDS: FBgn0051973, CDS: FBgn0051973, CDS: FBgn0051973, CDS: FBgn0051973, CDS: FBgn0051973, CDS: FBgn0051973, CDS: FBgn0051973, Exon: Exon, Gene: FBgn0051973, Misc. feature: contig 2L_1_1 1..50000(1), mRNA: FBgn0051973, mRNA: FBgn0051973, mRNA: FBgn0051973, mRNA: FBgn0051973, mRNA: FBgn0051973, mRNA: FBgn0051973, mRNA: FBgn0051973, mRNA: FBgn0051973	FBpp0112328:c.[2009T>C]; FBpp0301164:c.[3578T>C]; FBpp0301167:c.[4442T>C]; FBpp0301168:c.[4562T>C]; FBpp0301165:c.[4262T>C]; FBpp0077822:c.[4886T>C]; FBpp0077821:c.[2009T>C]; FBpp0301166:c.[1565T>C]	FBpp0112328:p.[Met670Thr]; FBpp0301164:p.[Met1193Thr]; FBpp0301167:p.[Met1481Thr]; FBpp0301168:p.[Met1521Thr]; FBpp0301165:p.[Met1421Thr]; FBpp0077822:p.[Met1629Thr]; FBpp0077821:p.[Met670Thr]; FBpp0301166:p.[Met522Thr]
2L mapping	31003	SNV	1	G	C	45	100	33.5111	CDS: FBgn0051973, CDS: FBgn0051973, Exon: Exon, Gene: FBgn0051973, Misc. feature: contig 2L_1_1 1..50000(1), mRNA: FBgn0051973, mRNA: FBgn0051973	FBpp0301165:c.[4062-1935C>G]; FBpp0077822:c.[4076C>G]; FBpp0301164:c.[3378-1935C>G]; FBpp0301168:c.[4362-1935C>G]; FBpp0112328:c.[1809-1935C>G]; FBpp0077821:c.[1809-1935C>G]; FBpp0301166:c.[1365-1935C>G]; FBpp0301167:c.[3632C>G]	FBpp0077822:p.[Ala1359Gly]; FBpp0301167:p.[Ala1211Gly]
2L mapping	32124	SNV	1	C	A	42	97.619	33.8049	CDS: FBgn0051973, CDS: FBgn0051973, Exon: Exon, Gene: FBgn0051973, Misc. feature: contig 2L_1_1 1..50000(1), mRNA: FBgn0051973, mRNA: FBgn0051973	FBpp0301164:c.[3378-3056G>T]; FBpp0301166:c.[1364+2434G>T]; FBpp0301165:c.[4061+1721G>T]; FBpp0077821:c.[1808+1721G>T]; FBpp0301167:c.[2511G>T]; FBpp0301168:c.[4361+1721G>T]; FBpp0112328:c.[1808+1721G>T]; FBpp0077822:c.[2955G>T]	FBpp0301167:p.[Leu837Phe]; FBpp0077822:p.[Leu985Phe]
2L mapping	33256	SNV	1	G	T	56	100	34.7857	CDS: FBgn0051973, CDS: FBgn0051973, Exon: Exon, Gene: FBgn0051973, Misc. feature: contig 2L_1_1 1..50000(1), mRNA: FBgn0051973, mRNA: FBgn0051973	FBpp0301164:c.[3377+2490C>A]; FBpp0077822:c.[1823C>A]; FBpp0301168:c.[4361+589C>A]; FBpp0112328:c.[1808+589C>A]; FBpp0301165:c.[4061+589C>A]; FBpp0301167:c.[1379C>A]; FBpp0301166:c.[1364+1302C>A]; FBpp0077821:c.[1808+589C>A]	FBpp0077822:p.[Ala608Glu]; FBpp0301167:p.[Ala460Glu]
2L mapping	35460	SNV	1	C	T	38	100	34.8684	Gene: FBgn0051973, Misc. feature: contig 2L_1_1 1..50000(1)	FBpp0301168:c.[3378-248G>A]; FBpp0301164:c.[3377+286G>A]; FBpp0077822:c.[825-248G>A]; FBpp0301167:c.[825-248G>A]; FBpp0301166:c.[825-248G>A]; FBpp0301165:c.[3377+286G>A]; FBpp0112328:c.[825-248G>A]; FBpp0077821:c.[825-248G>A]
2L mapping	35621	SNV	1	G	T	44	100	35.8409	Gene: FBgn0051973, Misc. feature: contig 2L_1_1 1..50000(1)	FBpp0301164:c.[3377+125C>A]; FBpp0301166:c.[825-409C>A]; FBpp0301168:c.[3377+125C>A]; FBpp0077821:c.[825-409C>A]; FBpp0077822:c.[825-409C>A]; FBpp0301165:c.[3377+125C>A]; FBpp0301167:c.[825-409C>A]; FBpp0112328:c.[825-409C>A]
2L mapping	35646	Deletion	3	GAG	-	48	91.6667	34.1818	Gene: FBgn0051973, Misc. feature: contig 2L_1_1 1..50000(1)	FBpp0301164:c.[3377+98_3377+100delCTC]; FBpp0301167:c.[825-436_825-434delCTC]; FBpp0301166:c.[825-436_825-434delCTC]; FBpp0301168:c.[3377+98_3377+100delCTC]; FBpp0301165:c.[3377+98_3377+100delCTC]; FBpp0077821:c.[825-436_825-434delCTC]; FBpp0077822:c.[825-436_825-434delCTC]; FBpp0112328:c.[825-436_825-434delCTC]
2L mapping	35760	SNV	1	A	C	43	100	35.5116	CDS: FBgn0051973, CDS: FBgn0051973, CDS: FBgn0051973, Exon: Exon, Gene: FBgn0051973, Misc. feature: contig 2L_1_1 1..50000(1), mRNA: FBgn0051973, mRNA: FBgn0051973, mRNA: FBgn0051973	FBpp0301167:c.[825-548T>G]; FBpp0301165:c.[3363T>G]; FBpp0077822:c.[825-548T>G]; FBpp0112328:c.[825-548T>G]; FBpp0077821:c.[825-548T>G]; FBpp0301168:c.[3363T>G]; FBpp0301166:c.[825-548T>G]; FBpp0301164:c.[3363T>G]	FBpp0301165:p.[Ser1121Arg]; FBpp0301168:p.[Ser1121Arg]; FBpp0301164:p.[Ser1121Arg]
2L mapping	35976	SNV	1	C	T	42	100	34.381	CDS: FBgn0051973, CDS: FBgn0051973, CDS: FBgn0051973, Exon: Exon, Gene: FBgn0051973, Misc. feature: contig 2L_1_1 1..50000(1), mRNA: FBgn0051973, mRNA: FBgn0051973, mRNA: FBgn0051973	FBpp0301168:c.[3147G>A]; FBpp0301164:c.[3147G>A]; FBpp0301165:c.[3147G>A]; FBpp0112328:c.[825-764G>A]; FBpp0301166:c.[825-764G>A]; FBpp0077822:c.[825-764G>A]; FBpp0301167:c.[825-764G>A]; FBpp0077821:c.[825-764G>A]
2L mapping	36330	SNV	1	A	T	32	100	34.0938	CDS: FBgn0051973, CDS: FBgn0051973, CDS: FBgn0051973, Exon: Exon, Gene: FBgn0051973, Misc. feature: contig 2L_1_1 1..50000(1), mRNA: FBgn0051973, mRNA: FBgn0051973, mRNA: FBgn0051973	FBpp0301166:c.[825-1118T>A]; FBpp0301164:c.[2793T>A]; FBpp0077821:c.[825-1118T>A]; FBpp0301168:c.[2793T>A]; FBpp0301167:c.[825-1118T>A]; FBpp0112328:c.[825-1118T>A]; FBpp0077822:c.[825-1118T>A]; FBpp0301165:c.[2793T>A]	FBpp0301164:p.[Asp931Glu]; FBpp0301168:p.[Asp931Glu]; FBpp0301165:p.[Asp931Glu]
2L mapping	36696	SNV	1	A	C	33	100	34.4848	CDS: FBgn0051973, CDS: FBgn0051973, CDS: FBgn0051973, Exon: Exon, Gene: FBgn0051973, Misc. feature: contig 2L_1_1 1..50000(1), mRNA: FBgn0051973, mRNA: FBgn0051973, mRNA: FBgn0051973	FBpp0301168:c.[2427T>G]; FBpp0301167:c.[825-1484T>G]; FBpp0077822:c.[825-1484T>G]; FBpp0301165:c.[2427T>G]; FBpp0077821:c.[825-1484T>G]; FBpp0301166:c.[825-1484T>G]; FBpp0112328:c.[825-1484T>G]; FBpp0301164:c.[2427T>G]	FBpp0301168:p.[Asp809Glu]; FBpp0301165:p.[Asp809Glu]; FBpp0301164:p.[Asp809Glu]
2L mapping	36861	SNV	1	T	G	41	100	35.439	CDS: FBgn0051973, CDS: FBgn0051973, CDS: FBgn0051973, Exon: Exon, Gene: FBgn0051973, Misc. feature: contig 2L_1_1 1..50000(1), mRNA: FBgn0051973, mRNA: FBgn0051973, mRNA: FBgn0051973	FBpp0301164:c.[2262A>C]; FBpp0301165:c.[2262A>C]; FBpp0112328:c.[825-1649A>C]; FBpp0077822:c.[825-1649A>C]; FBpp0301168:c.[2262A>C]; FBpp0077821:c.[825-1649A>C]; FBpp0301167:c.[825-1649A>C]; FBpp0301166:c.[825-1649A>C]
2L mapping	38826	SNV	1	G	A	50	100	36.56	Gene: FBgn0051973, Misc. feature: contig 2L_1_1 1..50000(1)	FBpp0301168:c.[628-95C>T]; FBpp0301167:c.[628-95C>T]; FBpp0301166:c.[628-95C>T]; FBpp0301165:c.[628-95C>T]; FBpp0077821:c.[628-95C>T]; FBpp0112328:c.[628-95C>T]; FBpp0077822:c.[628-95C>T]; FBpp0301164:c.[628-95C>T]
2L mapping	39031	Replacement	6	CT	AAGAGC	14	85.7143	35.875	Gene: FBgn0051973, Misc. feature: contig 2L_1_1 1..50000(1)	FBpp0077821:c.[627+269_627+270delAGinsGCTCTT]; FBpp0301166:c.[627+269_627+270delAGinsGCTCTT]; FBpp0301167:c.[627+269_627+270delAGinsGCTCTT]; FBpp0301165:c.[627+269_627+270delAGinsGCTCTT]; FBpp0301168:c.[627+269_627+270delAGinsGCTCTT]; FBpp0112328:c.[627+269_627+270delAGinsGCTCTT]; FBpp0301164:c.[627+269_627+270delAGinsGCTCTT]; FBpp0077822:c.[627+269_627+270delAGinsGCTCTT]
2L mapping	39037	Insertion	1	-	G	14	92.8571	35.8462	Gene: FBgn0051973, Misc. feature: contig 2L_1_1 1..50000(1)	FBpp0077822:c.[627+264_627+265insC]; FBpp0077821:c.[627+264_627+265insC]; FBpp0301164:c.[627+264_627+265insC]; FBpp0301167:c.[627+264_627+265insC]; FBpp0301166:c.[627+264_627+265insC]; FBpp0301168:c.[627+264_627+265insC]; FBpp0301165:c.[627+264_627+265insC]; FBpp0112328:c.[627+264_627+265insC]
2L mapping	39038	Insertion	5	-	GCGGT	14	92.8571	35.6615	Gene: FBgn0051973, Misc. feature: contig 2L_1_1 1..50000(1)	FBpp0301167:c.[627+263_627+264insACCGC]; FBpp0301165:c.[627+263_627+264insACCGC]; FBpp0077821:c.[627+263_627+264insACCGC]; FBpp0301166:c.[627+263_627+264insACCGC]; FBpp0301168:c.[627+263_627+264insACCGC]; FBpp0112328:c.[627+263_627+264insACCGC]; FBpp0077822:c.[627+263_627+264insACCGC]; FBpp0301164:c.[627+263_627+264insACCGC]
2L mapping	39100	Deletion	1	T	-	49	87.7551	31.5581	Gene: FBgn0051973, Misc. feature: contig 2L_1_1 1..50000(1)	FBpp0301167:c.[627+201delA]; FBpp0301168:c.[627+201delA]; FBpp0301164:c.[627+201delA]; FBpp0112328:c.[627+201delA]; FBpp0301165:c.[627+201delA]; FBpp0077821:c.[627+201delA]; FBpp0301166:c.[627+201delA]; FBpp0077822:c.[627+201delA]
2L mapping	39397	SNV	1	A	C	40	100	33.575	CDS: FBgn0051973, CDS: FBgn0051973, CDS: FBgn0051973, CDS: FBgn0051973, CDS: FBgn0051973, CDS: FBgn0051973, CDS: FBgn0051973, CDS: FBgn0051973, Exon: Exon, Gene: FBgn0051973, Misc. feature: contig 2L_1_1 1..50000(1), mRNA: FBgn0051973, mRNA: FBgn0051973, mRNA: FBgn0051973, mRNA: FBgn0051973, mRNA: FBgn0051973, mRNA: FBgn0051973, mRNA: FBgn0051973, mRNA: FBgn0051973	FBpp0301165:c.[531T>G]; FBpp0077821:c.[531T>G]; FBpp0301168:c.[531T>G]; FBpp0077822:c.[531T>G]; FBpp0301167:c.[531T>G]; FBpp0301166:c.[531T>G]; FBpp0301164:c.[531T>G]; FBpp0112328:c.[531T>G]
2L mapping	39826	SNV	1	C	T	46	100	34.2174	CDS: FBgn0051973, CDS: FBgn0051973, CDS: FBgn0051973, CDS: FBgn0051973, CDS: FBgn0051973, CDS: FBgn0051973, CDS: FBgn0051973, CDS: FBgn0051973, Exon: Exon, Gene: FBgn0051973, Misc. feature: contig 2L_1_1 1..50000(1), mRNA: FBgn0051973, mRNA: FBgn0051973, mRNA: FBgn0051973, mRNA: FBgn0051973, mRNA: FBgn0051973, mRNA: FBgn0051973, mRNA: FBgn0051973, mRNA: FBgn0051973	FBpp0112328:c.[102G>A]; FBpp0301167:c.[102G>A]; FBpp0301164:c.[102G>A]; FBpp0077822:c.[102G>A]; FBpp0301168:c.[102G>A]; FBpp0301166:c.[102G>A]; FBpp0301165:c.[102G>A]; FBpp0077821:c.[102G>A]
2L mapping	40556	SNV	1	C	T	57	98.2456	36.3571	Gene: FBgn0051973, Misc. feature: contig 2L_1_1 1..50000(1)	FBpp0301165:c.[71-699G>A]; FBpp0301167:c.[71-699G>A]; FBpp0301168:c.[71-699G>A]; FBpp0112328:c.[71-699G>A]; FBpp0301166:c.[71-699G>A]; FBpp0301164:c.[71-699G>A]; FBpp0077821:c.[71-699G>A]; FBpp0077822:c.[71-699G>A]
2L mapping	40750	SNV	1	C	T	36	100	35.6111	Gene: FBgn0051973, Misc. feature: contig 2L_1_1 1..50000(1)	FBpp0301164:c.[71-893G>A]; FBpp0301166:c.[71-893G>A]; FBpp0301165:c.[71-893G>A]; FBpp0077821:c.[71-893G>A]; FBpp0301168:c.[71-893G>A]; FBpp0301167:c.[71-893G>A]; FBpp0077822:c.[71-893G>A]; FBpp0112328:c.[71-893G>A]
2L mapping	40829	SNV	1	A	G	54	100	36.0556	Gene: FBgn0051973, Misc. feature: contig 2L_1_1 1..50000(1)	FBpp0112328:c.[71-972T>C]; FBpp0301164:c.[71-972T>C]; FBpp0077822:c.[71-972T>C]; FBpp0301168:c.[71-972T>C]; FBpp0301165:c.[71-972T>C]; FBpp0077821:c.[71-972T>C]; FBpp0301167:c.[71-972T>C]; FBpp0301166:c.[71-972T>C]
2L mapping	40852	SNV	1	T	C	54	96.2963	34.9038	Gene: FBgn0051973, Misc. feature: contig 2L_1_1 1..50000(1)	FBpp0301164:c.[71-995A>G]; FBpp0112328:c.[71-995A>G]; FBpp0077822:c.[71-995A>G]; FBpp0301166:c.[71-995A>G]; FBpp0301165:c.[71-995A>G]; FBpp0301167:c.[71-995A>G]; FBpp0077821:c.[71-995A>G]; FBpp0301168:c.[71-995A>G]
2L mapping	41405	SNV	1	T	A	50	100	35.82	Gene: FBgn0051973, Misc. feature: contig 2L_1_1 1..50000(1)	FBpp0077822:c.[71-1548A>T]; FBpp0077821:c.[71-1548A>T]; FBpp0301167:c.[71-1548A>T]; FBpp0301166:c.[71-1548A>T]; FBpp0301168:c.[71-1548A>T]; FBpp0112328:c.[71-1548A>T]; FBpp0301165:c.[71-1548A>T]; FBpp0301164:c.[71-1548A>T]
2L mapping	41860	SNV	1	T	G	52	100	35.0192	Gene: FBgn0051973, Misc. feature: contig 2L_1_1 1..50000(1)	FBpp0077822:c.[71-2003A>C]; FBpp0301167:c.[71-2003A>C]; FBpp0301165:c.[71-2003A>C]; FBpp0301164:c.[71-2003A>C]; FBpp0112328:c.[71-2003A>C]; FBpp0301168:c.[71-2003A>C]; FBpp0077821:c.[71-2003A>C]; FBpp0301166:c.[71-2003A>C]
2L mapping	41882	Insertion	1	-	C	54	98.1481	36.0189	Gene: FBgn0051973, Misc. feature: contig 2L_1_1 1..50000(1)	FBpp0112328:c.[71-2025_71-2024insG]; FBpp0077821:c.[71-2025_71-2024insG]; FBpp0301167:c.[71-2025_71-2024insG]; FBpp0077822:c.[71-2025_71-2024insG]; FBpp0301168:c.[71-2025_71-2024insG]; FBpp0301164:c.[71-2025_71-2024insG]; FBpp0301165:c.[71-2025_71-2024insG]; FBpp0301166:c.[71-2025_71-2024insG]
2L mapping	42186	SNV	1	C	G	56	100	35.0357	Gene: FBgn0051973, Misc. feature: contig 2L_1_1 1..50000(1)	FBpp0112328:c.[71-2329G>C]; FBpp0301167:c.[71-2329G>C]; FBpp0077822:c.[71-2329G>C]; FBpp0301166:c.[71-2329G>C]; FBpp0077821:c.[71-2329G>C]; FBpp0301164:c.[71-2329G>C]; FBpp0301165:c.[71-2329G>C]; FBpp0301168:c.[71-2329G>C]
2L mapping	42385	Insertion	5	-	TCGCC	41	75.6098	35.9226	Gene: FBgn0051973, Misc. feature: contig 2L_1_1 1..50000(1)	FBpp0301165:c.[71-2528_71-2527insGGCGA]; FBpp0112328:c.[71-2528_71-2527insGGCGA]; FBpp0301164:c.[71-2528_71-2527insGGCGA]; FBpp0301168:c.[71-2528_71-2527insGGCGA]; FBpp0301166:c.[71-2528_71-2527insGGCGA]; FBpp0077822:c.[71-2528_71-2527insGGCGA]; FBpp0301167:c.[71-2528_71-2527insGGCGA]; FBpp0077821:c.[71-2528_71-2527insGGCGA]
2L mapping	42709	SNV	1	G	A	48	100	36.1042	Gene: FBgn0051973, Misc. feature: contig 2L_1_1 1..50000(1)	FBpp0301164:c.[71-2852C>T]; FBpp0301165:c.[71-2852C>T]; FBpp0077821:c.[71-2852C>T]; FBpp0301168:c.[71-2852C>T]; FBpp0301167:c.[71-2852C>T]; FBpp0301166:c.[71-2852C>T]; FBpp0112328:c.[71-2852C>T]; FBpp0077822:c.[71-2852C>T]
2L mapping	42772	SNV	1	A	C	46	100	35.7174	Gene: FBgn0051973, Misc. feature: contig 2L_1_1 1..50000(1)	FBpp0301164:c.[71-2915T>G]; FBpp0301165:c.[71-2915T>G]; FBpp0077821:c.[71-2915T>G]; FBpp0301166:c.[71-2915T>G]; FBpp0112328:c.[71-2915T>G]; FBpp0301167:c.[71-2915T>G]; FBpp0301168:c.[71-2915T>G]; FBpp0077822:c.[71-2915T>G]
2L mapping	42850	SNV	1	A	T	37	100	34.8378	Gene: FBgn0051973, Misc. feature: contig 2L_1_1 1..50000(1)	FBpp0112328:c.[71-2993T>A]; FBpp0301166:c.[71-2993T>A]; FBpp0077822:c.[71-2993T>A]; FBpp0301167:c.[71-2993T>A]; FBpp0301168:c.[71-2993T>A]; FBpp0077821:c.[71-2993T>A]; FBpp0301165:c.[71-2993T>A]; FBpp0301164:c.[71-2993T>A]
2L mapping	42877	Insertion	1	-	C	39	84.6154	35.7576	Gene: FBgn0051973, Misc. feature: contig 2L_1_1 1..50000(1)	FBpp0112328:c.[71-3020_71-3019insG]; FBpp0077822:c.[71-3020_71-3019insG]; FBpp0077821:c.[71-3020_71-3019insG]; FBpp0301165:c.[71-3020_71-3019insG]; FBpp0301167:c.[71-3020_71-3019insG]; FBpp0301164:c.[71-3020_71-3019insG]; FBpp0301168:c.[71-3020_71-3019insG]; FBpp0301166:c.[71-3020_71-3019insG]
2L mapping	43102	SNV	1	A	G	44	100	33.2727	Gene: FBgn0051973, Misc. feature: contig 2L_1_1 1..50000(1)	FBpp0301168:c.[71-3245T>C]; FBpp0301166:c.[71-3245T>C]; FBpp0112328:c.[71-3245T>C]; FBpp0301165:c.[71-3245T>C]; FBpp0077821:c.[71-3245T>C]; FBpp0301167:c.[71-3245T>C]; FBpp0077822:c.[71-3245T>C]; FBpp0301164:c.[71-3245T>C]
2L mapping	43265	SNV	1	A	G	55	100	34.4909	Gene: FBgn0051973, Misc. feature: contig 2L_1_1 1..50000(1)	FBpp0301166:c.[71-3408T>C]; FBpp0301164:c.[71-3408T>C]; FBpp0077822:c.[71-3408T>C]; FBpp0301168:c.[71-3408T>C]; FBpp0301167:c.[71-3408T>C]; FBpp0301165:c.[71-3408T>C]; FBpp0077821:c.[71-3408T>C]; FBpp0112328:c.[71-3408T>C]
2L mapping	44434	Insertion	1	-	T	36	97.2222	34.9143	Gene: FBgn0051973, Misc. feature: contig 2L_1_1 1..50000(1)	FBpp0301168:c.[71-4577_71-4576insA]; FBpp0301165:c.[71-4577_71-4576insA]; FBpp0301166:c.[71-4577_71-4576insA]; FBpp0301167:c.[71-4577_71-4576insA]; FBpp0112328:c.[71-4577_71-4576insA]; FBpp0301164:c.[71-4577_71-4576insA]; FBpp0077822:c.[71-4577_71-4576insA]; FBpp0077821:c.[71-4577_71-4576insA]
2L mapping	44679	SNV	1	A	T	42	100	35.5476	Gene: FBgn0051973, Misc. feature: contig 2L_1_1 1..50000(1)	FBpp0301167:c.[71-4822T>A]; FBpp0077822:c.[71-4822T>A]; FBpp0301168:c.[71-4822T>A]; FBpp0077821:c.[71-4822T>A]; FBpp0301164:c.[71-4822T>A]; FBpp0301166:c.[71-4822T>A]; FBpp0112328:c.[71-4822T>A]; FBpp0301165:c.[71-4822T>A]
2L mapping	45120	SNV	1	T	A	38	100	32.4211	Gene: FBgn0051973, Misc. feature: contig 2L_1_1 1..50000(1)	FBpp0301168:c.[71-5263A>T]; FBpp0301167:c.[71-5263A>T]; FBpp0301166:c.[71-5263A>T]; FBpp0112328:c.[71-5263A>T]; FBpp0301165:c.[71-5263A>T]; FBpp0301164:c.[71-5263A>T]; FBpp0077822:c.[71-5263A>T]; FBpp0077821:c.[71-5263A>T]
2L mapping	45282	Insertion	3	-	GTG	38	78.9474	34.9111	Gene: FBgn0051973, Misc. feature: contig 2L_1_1 1..50000(1)	FBpp0077822:c.[71-5425_71-5424insCAC]; FBpp0301168:c.[71-5425_71-5424insCAC]; FBpp0301164:c.[71-5425_71-5424insCAC]; FBpp0301165:c.[71-5425_71-5424insCAC]; FBpp0301167:c.[71-5425_71-5424insCAC]; FBpp0301166:c.[71-5425_71-5424insCAC]; FBpp0112328:c.[71-5425_71-5424insCAC]; FBpp0077821:c.[71-5425_71-5424insCAC]
2L mapping	45770	SNV	1	T	A	41	100	35.9512	Gene: FBgn0051973, Misc. feature: contig 2L_1_1 1..50000(1)	FBpp0301164:c.[71-5913A>T]; FBpp0301166:c.[71-5913A>T]; FBpp0301165:c.[71-5913A>T]; FBpp0301168:c.[71-5913A>T]; FBpp0112328:c.[71-5913A>T]; FBpp0077821:c.[71-5913A>T]; FBpp0077822:c.[71-5913A>T]; FBpp0301167:c.[71-5913A>T]
2L mapping	46708	SNV	1	T	A	41	100	36.1463	Gene: FBgn0051973, Misc. feature: contig 2L_1_1 1..50000(1)	FBpp0301167:c.[71-6851A>T]; FBpp0077821:c.[71-6851A>T]; FBpp0301168:c.[71-6851A>T]; FBpp0301166:c.[71-6851A>T]; FBpp0301165:c.[71-6851A>T]; FBpp0112328:c.[71-6851A>T]; FBpp0077822:c.[71-6851A>T]; FBpp0301164:c.[71-6851A>T]
2L mapping	47085	Deletion	4	TCTA	-	53	79.2453	35.7381	Gene: FBgn0051973, Misc. feature: contig 2L_1_1 1..50000(1)	FBpp0301164:c.[71-7231_71-7228delTAGA]; FBpp0301165:c.[71-7231_71-7228delTAGA]; FBpp0301167:c.[71-7231_71-7228delTAGA]; FBpp0301166:c.[71-7231_71-7228delTAGA]; FBpp0077821:c.[71-7231_71-7228delTAGA]; FBpp0301168:c.[71-7231_71-7228delTAGA]; FBpp0112328:c.[71-7231_71-7228delTAGA]; FBpp0077822:c.[71-7231_71-7228delTAGA]
2L mapping	47108	SNV	1	A	G	48	95.8333	35.4348	Gene: FBgn0051973, Misc. feature: contig 2L_1_1 1..50000(1)	FBpp0301166:c.[71-7251T>C]; FBpp0301168:c.[71-7251T>C]; FBpp0077822:c.[71-7251T>C]; FBpp0301165:c.[71-7251T>C]; FBpp0077821:c.[71-7251T>C]; FBpp0301167:c.[71-7251T>C]; FBpp0112328:c.[71-7251T>C]; FBpp0301164:c.[71-7251T>C]
2L mapping	47287	SNV	1	T	A	54	100	35.6296	Gene: FBgn0051973, Misc. feature: contig 2L_1_1 1..50000(1)	FBpp0301167:c.[71-7430A>T]; FBpp0077821:c.[71-7430A>T]; FBpp0301166:c.[71-7430A>T]; FBpp0301164:c.[71-7430A>T]; FBpp0301165:c.[71-7430A>T]; FBpp0301168:c.[71-7430A>T]; FBpp0112328:c.[71-7430A>T]; FBpp0077822:c.[71-7430A>T]
2L mapping	47356	Deletion	1	T	-	47	91.4894	34.6744	Gene: FBgn0051973, Misc. feature: contig 2L_1_1 1..50000(1)	FBpp0112328:c.[71-7499delA]; FBpp0301165:c.[71-7499delA]; FBpp0301167:c.[71-7499delA]; FBpp0077822:c.[71-7499delA]; FBpp0077821:c.[71-7499delA]; FBpp0301164:c.[71-7499delA]; FBpp0301168:c.[71-7499delA]; FBpp0301166:c.[71-7499delA]
2L mapping	48344	SNV	1	C	T	12	91.6667	33.6364	Gene: FBgn0051973, Misc. feature: contig 2L_1_1 1..50000(1)	FBpp0301164:c.[71-8487G>A]; FBpp0301167:c.[71-8487G>A]; FBpp0077821:c.[71-8487G>A]; FBpp0112328:c.[71-8487G>A]; FBpp0301165:c.[71-8487G>A]; FBpp0301168:c.[71-8487G>A]; FBpp0301166:c.[71-8487G>A]; FBpp0077822:c.[71-8487G>A]
2L mapping	52553	MNV	2	AA	CG	25	72	33.3333	Gene: FBgn0051973, Misc. feature: contig 2L_1_2 1..50000(1)	FBpp0301166:c.[70+5527_70+5528delTTinsCG]; FBpp0301165:c.[70+5527_70+5528delTTinsCG]; FBpp0077822:c.[70+5527_70+5528delTTinsCG]; FBpp0301168:c.[70+5527_70+5528delTTinsCG]; FBpp0077821:c.[70+5527_70+5528delTTinsCG]; FBpp0112328:c.[70+5527_70+5528delTTinsCG]; FBpp0301167:c.[70+5527_70+5528delTTinsCG]; FBpp0301164:c.[70+5527_70+5528delTTinsCG]
2L mapping	52557	SNV	1	A	C	25	68	34	Gene: FBgn0051973, Misc. feature: contig 2L_1_2 1..50000(1)	FBpp0077822:c.[70+5524T>G]; FBpp0301166:c.[70+5524T>G]; FBpp0301165:c.[70+5524T>G]; FBpp0301168:c.[70+5524T>G]; FBpp0077821:c.[70+5524T>G]; FBpp0112328:c.[70+5524T>G]; FBpp0301164:c.[70+5524T>G]; FBpp0301167:c.[70+5524T>G]
2L mapping	52559	SNV	1	A	C	24	75	35.0556	Gene: FBgn0051973, Misc. feature: contig 2L_1_2 1..50000(1)	FBpp0077822:c.[70+5522T>G]; FBpp0112328:c.[70+5522T>G]; FBpp0301168:c.[70+5522T>G]; FBpp0301165:c.[70+5522T>G]; FBpp0301166:c.[70+5522T>G]; FBpp0077821:c.[70+5522T>G]; FBpp0301167:c.[70+5522T>G]; FBpp0301164:c.[70+5522T>G]
2L mapping	52936	SNV	1	G	A	54	100	34.0185	Gene: FBgn0051973, Misc. feature: contig 2L_1_2 1..50000(1)	FBpp0301168:c.[70+5145C>T]; FBpp0301166:c.[70+5145C>T]; FBpp0301167:c.[70+5145C>T]; FBpp0112328:c.[70+5145C>T]; FBpp0301164:c.[70+5145C>T]; FBpp0077821:c.[70+5145C>T]; FBpp0077822:c.[70+5145C>T]; FBpp0301165:c.[70+5145C>T]
2L mapping	54273	MNV	2	AT	GA	41	100	36.1707	Gene: FBgn0051973, Misc. feature: contig 2L_1_2 1..50000(1)	FBpp0301167:c.[70+3807_70+3808delATinsTC]; FBpp0112328:c.[70+3807_70+3808delATinsTC]; FBpp0301165:c.[70+3807_70+3808delATinsTC]; FBpp0301168:c.[70+3807_70+3808delATinsTC]; FBpp0077822:c.[70+3807_70+3808delATinsTC]; FBpp0077821:c.[70+3807_70+3808delATinsTC]; FBpp0301164:c.[70+3807_70+3808delATinsTC]; FBpp0301166:c.[70+3807_70+3808delATinsTC]
2L mapping	54339	SNV	1	T	A	48	100	35.8958	Gene: FBgn0051973, Misc. feature: contig 2L_1_2 1..50000(1)	FBpp0301166:c.[70+3742A>T]; FBpp0301168:c.[70+3742A>T]; FBpp0301165:c.[70+3742A>T]; FBpp0077822:c.[70+3742A>T]; FBpp0301167:c.[70+3742A>T]; FBpp0112328:c.[70+3742A>T]; FBpp0301164:c.[70+3742A>T]; FBpp0077821:c.[70+3742A>T]
2L mapping	54442	Deletion	2	AT	-	31	41.9355	34.3077	Gene: FBgn0051973, Misc. feature: contig 2L_1_2 1..50000(1)	FBpp0301164:c.[70+3638_70+3639delAT]; FBpp0301166:c.[70+3638_70+3639delAT]; FBpp0301168:c.[70+3638_70+3639delAT]; FBpp0301165:c.[70+3638_70+3639delAT]; FBpp0112328:c.[70+3638_70+3639delAT]; FBpp0301167:c.[70+3638_70+3639delAT]; FBpp0077822:c.[70+3638_70+3639delAT]; FBpp0077821:c.[70+3638_70+3639delAT]
2L mapping	54457	Deletion	2	AT	-	39	58.9744	34.6522	Gene: FBgn0051973, Misc. feature: contig 2L_1_2 1..50000(1)	FBpp0301166:c.[70+3623_70+3624delAT]; FBpp0301167:c.[70+3623_70+3624delAT]; FBpp0301168:c.[70+3623_70+3624delAT]; FBpp0301164:c.[70+3623_70+3624delAT]; FBpp0077821:c.[70+3623_70+3624delAT]; FBpp0112328:c.[70+3623_70+3624delAT]; FBpp0301165:c.[70+3623_70+3624delAT]; FBpp0077822:c.[70+3623_70+3624delAT]
2L mapping	54460	Deletion	1	T	-	41	36.5854	35.4667	Gene: FBgn0051973, Misc. feature: contig 2L_1_2 1..50000(1)	FBpp0077821:c.[70+3621delA]; FBpp0301165:c.[70+3621delA]; FBpp0301166:c.[70+3621delA]; FBpp0112328:c.[70+3621delA]; FBpp0077822:c.[70+3621delA]; FBpp0301168:c.[70+3621delA]; FBpp0301164:c.[70+3621delA]; FBpp0301167:c.[70+3621delA]
2L mapping	54466	Deletion	1	A	-	42	71.4286	33.9333	Gene: FBgn0051973, Misc. feature: contig 2L_1_2 1..50000(1)	FBpp0301166:c.[70+3615delT]; FBpp0077821:c.[70+3615delT]; FBpp0301164:c.[70+3615delT]; FBpp0301167:c.[70+3615delT]; FBpp0301168:c.[70+3615delT]; FBpp0301165:c.[70+3615delT]; FBpp0077822:c.[70+3615delT]; FBpp0112328:c.[70+3615delT]
2L mapping	54570	SNV	1	G	A	36	100	35.2222	Gene: FBgn0051973, Misc. feature: contig 2L_1_2 1..50000(1)	FBpp0301167:c.[70+3511C>T]; FBpp0077821:c.[70+3511C>T]; FBpp0301166:c.[70+3511C>T]; FBpp0301164:c.[70+3511C>T]; FBpp0077822:c.[70+3511C>T]; FBpp0301168:c.[70+3511C>T]; FBpp0112328:c.[70+3511C>T]; FBpp0301165:c.[70+3511C>T]
2L mapping	54573	SNV	1	A	G	37	100	34.2973	Gene: FBgn0051973, Misc. feature: contig 2L_1_2 1..50000(1)	FBpp0301168:c.[70+3508T>C]; FBpp0112328:c.[70+3508T>C]; FBpp0301164:c.[70+3508T>C]; FBpp0077822:c.[70+3508T>C]; FBpp0301166:c.[70+3508T>C]; FBpp0077821:c.[70+3508T>C]; FBpp0301165:c.[70+3508T>C]; FBpp0301167:c.[70+3508T>C]
2L mapping	55719	Deletion	1	A	-	45	100	34.6222	Gene: FBgn0051973, Misc. feature: contig 2L_1_2 1..50000(1)	FBpp0077821:c.[70+2362delT]; FBpp0077822:c.[70+2362delT]; FBpp0301166:c.[70+2362delT]; FBpp0301168:c.[70+2362delT]; FBpp0112328:c.[70+2362delT]; FBpp0301164:c.[70+2362delT]; FBpp0301165:c.[70+2362delT]; FBpp0301167:c.[70+2362delT]
2L mapping	55774	SNV	1	A	G	40	100	34.125	Gene: FBgn0051973, Misc. feature: contig 2L_1_2 1..50000(1)	FBpp0301168:c.[70+2307T>C]; FBpp0077821:c.[70+2307T>C]; FBpp0301167:c.[70+2307T>C]; FBpp0112328:c.[70+2307T>C]; FBpp0077822:c.[70+2307T>C]; FBpp0301166:c.[70+2307T>C]; FBpp0301164:c.[70+2307T>C]; FBpp0301165:c.[70+2307T>C]
2L mapping	56423	SNV	1	C	T	44	100	34.5909	Gene: FBgn0051973, Misc. feature: contig 2L_1_2 1..50000(1)	FBpp0112328:c.[70+1658G>A]; FBpp0301167:c.[70+1658G>A]; FBpp0077822:c.[70+1658G>A]; FBpp0301168:c.[70+1658G>A]; FBpp0301165:c.[70+1658G>A]; FBpp0077821:c.[70+1658G>A]; FBpp0301166:c.[70+1658G>A]; FBpp0301164:c.[70+1658G>A]
2L mapping	57088	SNV	1	G	T	48	100	35.8333	Gene: FBgn0051973, Misc. feature: contig 2L_1_2 1..50000(1)	FBpp0301165:c.[70+993C>A]; FBpp0301164:c.[70+993C>A]; FBpp0301166:c.[70+993C>A]; FBpp0077821:c.[70+993C>A]; FBpp0301168:c.[70+993C>A]; FBpp0301167:c.[70+993C>A]; FBpp0112328:c.[70+993C>A]; FBpp0077822:c.[70+993C>A]
2L mapping	57096	SNV	1	T	C	45	100	35.7333	Gene: FBgn0051973, Misc. feature: contig 2L_1_2 1..50000(1)	FBpp0301166:c.[70+985A>G]; FBpp0077822:c.[70+985A>G]; FBpp0077821:c.[70+985A>G]; FBpp0301164:c.[70+985A>G]; FBpp0112328:c.[70+985A>G]; FBpp0301165:c.[70+985A>G]; FBpp0301167:c.[70+985A>G]; FBpp0301168:c.[70+985A>G]
2L mapping	57256	SNV	1	C	T	45	100	35.1778	Gene: FBgn0051973, Misc. feature: contig 2L_1_2 1..50000(1)	FBpp0077822:c.[70+825G>A]; FBpp0301166:c.[70+825G>A]; FBpp0301165:c.[70+825G>A]; FBpp0112328:c.[70+825G>A]; FBpp0301164:c.[70+825G>A]; FBpp0301167:c.[70+825G>A]; FBpp0301168:c.[70+825G>A]; FBpp0077821:c.[70+825G>A]
2L mapping	57620	Insertion	1	-	C	27	96.2963	33.8462	Gene: FBgn0051973, Misc. feature: contig 2L_1_2 1..50000(1)	FBpp0301165:c.[70+461_70+462insG]; FBpp0301167:c.[70+461_70+462insG]; FBpp0112328:c.[70+461_70+462insG]; FBpp0301168:c.[70+461_70+462insG]; FBpp0301166:c.[70+461_70+462insG]; FBpp0301164:c.[70+461_70+462insG]; FBpp0077822:c.[70+461_70+462insG]; FBpp0077821:c.[70+461_70+462insG]
2L mapping	57621	Replacement	2	A	CG	27	96.2963	30.6923	Gene: FBgn0051973, Misc. feature: contig 2L_1_2 1..50000(1)	FBpp0301165:c.[70+460delTinsCG]; FBpp0077822:c.[70+460delTinsCG]; FBpp0077821:c.[70+460delTinsCG]; FBpp0301164:c.[70+460delTinsCG]; FBpp0301166:c.[70+460delTinsCG]; FBpp0301167:c.[70+460delTinsCG]; FBpp0112328:c.[70+460delTinsCG]; FBpp0301168:c.[70+460delTinsCG]
2L mapping	57624	MNV	2	AA	TG	27	100	33.3704	Gene: FBgn0051973, Misc. feature: contig 2L_1_2 1..50000(1)	FBpp0112328:c.[70+456_70+457delTTinsCA]; FBpp0301166:c.[70+456_70+457delTTinsCA]; FBpp0301164:c.[70+456_70+457delTTinsCA]; FBpp0077822:c.[70+456_70+457delTTinsCA]; FBpp0301168:c.[70+456_70+457delTTinsCA]; FBpp0301165:c.[70+456_70+457delTTinsCA]; FBpp0301167:c.[70+456_70+457delTTinsCA]; FBpp0077821:c.[70+456_70+457delTTinsCA]
2L mapping	57790	SNV	1	C	G	30	100	34.9667	Gene: FBgn0051973, Misc. feature: contig 2L_1_2 1..50000(1)	FBpp0077822:c.[70+291G>C]; FBpp0301166:c.[70+291G>C]; FBpp0077821:c.[70+291G>C]; FBpp0301168:c.[70+291G>C]; FBpp0112328:c.[70+291G>C]; FBpp0301164:c.[70+291G>C]; FBpp0301165:c.[70+291G>C]; FBpp0301167:c.[70+291G>C]
2L mapping	57810	SNV	1	A	G	35	100	35.0571	Gene: FBgn0051973, Misc. feature: contig 2L_1_2 1..50000(1)	FBpp0301165:c.[70+271T>C]; FBpp0301166:c.[70+271T>C]; FBpp0301167:c.[70+271T>C]; FBpp0077821:c.[70+271T>C]; FBpp0301168:c.[70+271T>C]; FBpp0301164:c.[70+271T>C]; FBpp0077822:c.[70+271T>C]; FBpp0112328:c.[70+271T>C]
2L mapping	58166	SNV	1	T	C	37	100	36.027	Exon: Exon, Exon: Exon, Exon: Exon, Gene: FBgn0051973, Misc. feature: contig 2L_1_2 1..50000(1), mRNA: FBgn0051973, mRNA: FBgn0051973, mRNA: FBgn0051973, mRNA: FBgn0051973, mRNA: FBgn0051973, mRNA: FBgn0051973, mRNA: FBgn0051973, mRNA: FBgn0051973
2L mapping	58825	SNV	1	G	A	40	100	35.2	Gene: FBgn0051973, Misc. feature: contig 2L_1_2 1..50000(1)
2L mapping	59250	Insertion	1	-	G	36	100	34.2778	Exon: Exon, Exon: Exon, Gene: FBgn0051973, Misc. feature: contig 2L_1_2 1..50000(1), mRNA: FBgn0051973, mRNA: FBgn0051973, mRNA: FBgn0051973, mRNA: FBgn0051973, mRNA: FBgn0051973, mRNA: FBgn0051973, mRNA: FBgn0051973
2L mapping	59472	Replacement	5	ACAAG	TT	26	96.1538	32.816	Gene: FBgn0051973, Misc. feature: contig 2L_1_2 1..50000(1)
2L mapping	60528	Deletion	1	C	-	32	100	32.5938	Gene: FBgn0051973, Misc. feature: contig 2L_1_2 1..50000(1)
2L mapping	60530	Deletion	1	T	-	32	100	33.4688	Gene: FBgn0051973, Misc. feature: contig 2L_1_2 1..50000(1)
2L mapping	60532	Replacement	4	TTTT	AAA	32	100	34.0156	Gene: FBgn0051973, Misc. feature: contig 2L_1_2 1..50000(1)
2L mapping	61450	SNV	1	T	C	33	100	36.4545	Gene: FBgn0051973, Misc. feature: contig 2L_1_2 1..50000(1)
2L mapping	61526	Insertion	1	-	C	46	91.3043	35.8333	Gene: FBgn0051973, Misc. feature: contig 2L_1_2 1..50000(1)
2L mapping	61593	SNV	1	G	T	49	97.9592	36.4167	Gene: FBgn0051973, Misc. feature: contig 2L_1_2 1..50000(1)
2L mapping	61604	SNV	1	G	T	42	100	33.7619	Gene: FBgn0051973, Misc. feature: contig 2L_1_2 1..50000(1)
2L mapping	61607	Insertion	1	-	A	42	92.8571	35.9487	Gene: FBgn0051973, Misc. feature: contig 2L_1_2 1..50000(1)
2L mapping	61797	SNV	1	G	C	44	100	35.4545	Gene: FBgn0051973, Misc. feature: contig 2L_1_2 1..50000(1)
2L mapping	62944	Insertion	1	-	A	33	100	36.697	Gene: FBgn0051973, Misc. feature: contig 2L_1_2 1..50000(1)
2L mapping	62945	MNV	3	TGC	CAA	33	100	35.6061	Gene: FBgn0051973, Misc. feature: contig 2L_1_2 1..50000(1)
2L mapping	63513	SNV	1	G	A	42	100	35.3333	Gene: FBgn0051973, Misc. feature: contig 2L_1_2 1..50000(1)
2L mapping	63575	SNV	1	A	G	43	100	33.3721	Gene: FBgn0051973, Misc. feature: contig 2L_1_2 1..50000(1)
2L mapping	64004	Deletion	1	T	-	39	51.2821	34.8	Gene: FBgn0051973, Misc. feature: contig 2L_1_2 1..50000(1)
2L mapping	64034	SNV	1	G	T	45	97.7778	34.1364	Gene: FBgn0051973, Misc. feature: contig 2L_1_2 1..50000(1)
2L mapping	64065	Insertion	6	-	TCAATC	25	88	32.8561	Gene: FBgn0051973, Misc. feature: contig 2L_1_2 1..50000(1)
2L mapping	64732	SNV	1	G	A	18	100	34.1667	Gene: FBgn0051973, Misc. feature: contig 2L_1_2 1..50000(1)
2L mapping	65405	SNV	1	G	T	51	100	34.2941	Misc. feature: contig 2L_1_2 1..50000(1)
2L mapping	65518	Insertion	1	-	T	51	92.1569	35.766	Misc. feature: contig 2L_1_2 1..50000(1)
2L mapping	65926	Deletion	5	ATTCA	-	30	76.6667	35.3913	Misc. feature: contig 2L_1_2 1..50000(1)
2L mapping	66908	SNV	1	G	A	46	100	36.2174	Exon: Exon, Gene: FBgn0067779, Misc. feature: contig 2L_1_2 1..50000(1), mRNA: FBgn0067779
2L mapping	66910	SNV	1	A	G	46	100	35.1739	Exon: Exon, Gene: FBgn0067779, Misc. feature: contig 2L_1_2 1..50000(1), mRNA: FBgn0067779
2L mapping	67241	SNV	1	A	G	61	100	34.9508	Exon: Exon, Gene: FBgn0067779, Misc. feature: contig 2L_1_2 1..50000(1), mRNA: FBgn0067779, mRNA: FBgn0067779
2L mapping	67497	SNV	1	T	C	53	98.1132	36.0577	Exon: Exon, Exon: Exon, Gene: FBgn0067779, Misc. feature: contig 2L_1_2 1..50000(1), mRNA: FBgn0067779, mRNA: FBgn0067779, mRNA: FBgn0067779, mRNA: FBgn0067779, mRNA: FBgn0067779
2L mapping	67877	SNV	1	C	T	40	100	35.65	Gene: FBgn0067779, Misc. feature: contig 2L_1_2 1..50000(1)	FBpp0297497:c.[139-15C>T]; FBpp0297494:c.[139-15C>T]; FBpp0297496:c.[139-15C>T]; FBpp0077759:c.[139-15C>T]; FBpp0297495:c.[139-15C>T]
2L mapping	70596	SNV	1	G	A	34	100	36.5294	Gene: FBgn0067779, Misc. feature: contig 2L_1_2 1..50000(1)	FBpp0297495:c.[2736-11G>A]; FBpp0297496:c.[2736-11G>A]; FBpp0077759:c.[2736-11G>A]; FBpp0297494:c.[2736-11G>A]; FBpp0297497:c.[2736-11G>A]
2L mapping	70661	SNV	1	A	C	39	100	34.0769	CDS: FBgn0067779, CDS: FBgn0067779, CDS: FBgn0067779, CDS: FBgn0067779, CDS: FBgn0067779, Exon: Exon, Exon: Exon, Gene: FBgn0067779, Misc. feature: contig 2L_1_2 1..50000(1), mRNA: FBgn0067779, mRNA: FBgn0067779, mRNA: FBgn0067779, mRNA: FBgn0067779, mRNA: FBgn0067779	FBpp0297497:c.[2790A>C]; FBpp0297496:c.[2790A>C]; FBpp0297495:c.[2790A>C]; FBpp0077759:c.[2790A>C]; FBpp0297494:c.[2790A>C]
2L mapping	70874	SNV	1	G	A	52	100	35.5962	CDS: FBgn0067779, CDS: FBgn0067779, CDS: FBgn0067779, CDS: FBgn0067779, CDS: FBgn0067779, Exon: Exon, Exon: Exon, Gene: FBgn0067779, Misc. feature: contig 2L_1_2 1..50000(1), mRNA: FBgn0067779, mRNA: FBgn0067779, mRNA: FBgn0067779, mRNA: FBgn0067779, mRNA: FBgn0067779	FBpp0297496:c.[3003G>A]; FBpp0297497:c.[3003G>A]; FBpp0297494:c.[3003G>A]; FBpp0297495:c.[3003G>A]; FBpp0077759:c.[3003G>A]
2L mapping	71001	SNV	1	T	C	60	100	34.3	Exon: Exon, Exon: Exon, Gene: FBgn0067779, Misc. feature: contig 2L_1_2 1..50000(1), mRNA: FBgn0067779, mRNA: FBgn0067779, mRNA: FBgn0067779, mRNA: FBgn0067779, mRNA: FBgn0067779
2L mapping	71942	Deletion	1	T	-	58	87.931	35.6863	Misc. RNA: FBgn0266322, Misc. RNA: FBgn0266322, Exon: Exon, Exon: Exon, Gene: FBgn0266322, Gene: FBgn0031213, Misc. feature: contig 2L_1_2 1..50000(1)
2L mapping	72395	SNV	1	T	G	51	100	34.7451	Misc. RNA: FBgn0266322, Misc. RNA: FBgn0266322, Exon: Exon, Exon: Exon, Exon: Exon, Gene: FBgn0266322, Gene: FBgn0031213, Misc. feature: contig 2L_1_2 1..50000(1), mRNA: FBgn0031213	FBpp0297498:c.69+314T>G
2L mapping	73211	Deletion	1	A	-	40	95	35.1842	Misc. RNA: FBgn0266322, Misc. RNA: FBgn0266322, Exon: Exon, Exon: Exon, Gene: FBgn0266322, Gene: FBgn0031213, Misc. feature: contig 2L_1_2 1..50000(1)	FBpp0297498:c.[69+1130delA]; FBpp0077760:c.[375+234delA]
2L mapping	73974	SNV	1	A	G	48	97.9167	33.7872	Gene: FBgn0031213, Misc. feature: contig 2L_1_2 1..50000(1)	FBpp0077760:c.[376-929A>G]; FBpp0291374:c.[123+282A>G]; FBpp0297498:c.[70-929A>G]
2L mapping	74485	SNV	1	C	A	54	100	34.7778	Exon: Exon, Gene: FBgn0031213, Misc. feature: contig 2L_1_2 1..50000(1), mRNA: FBgn0031213	FBpp0077760:c.[376-418C>A]; FBpp0291374:c.[124-418C>A]; FBpp0297498:c.[70-418C>A]
2L mapping	78186	Insertion	1	-	T	36	100	35.8611	Misc. feature: contig 2L_1_2 1..50000(1)
2L mapping	78190	Deletion	1	C	-	37	100	36.4595	Misc. feature: contig 2L_1_2 1..50000(1)
2L mapping	79460	SNV	1	C	G	55	100	34.2727	Misc. feature: contig 2L_1_2 1..50000(1)
2L mapping	79657	SNV	1	G	C	42	100	34.8095	Misc. feature: contig 2L_1_2 1..50000(1)
2L mapping	80050	Insertion	1	-	G	44	70.4545	36.0968	Misc. feature: contig 2L_1_2 1..50000(1)
2L mapping	80705	SNV	1	C	G	42	100	35.3095	Misc. feature: contig 2L_1_2 1..50000(1)
2L mapping	80816	Deletion	3	GAC	-	35	97.1429	35.1176	Misc. feature: contig 2L_1_2 1..50000(1)
2L mapping	80900	SNV	1	A	G	37	100	34.973	Misc. feature: contig 2L_1_2 1..50000(1)
2L mapping	81103	Deletion	1	T	-	42	100	34.9286	Misc. feature: contig 2L_1_2 1..50000(1)
2L mapping	81105	Deletion	3	ACG	-	42	100	34.2381	Misc. feature: contig 2L_1_2 1..50000(1)
2L mapping	81696	SNV	1	C	T	41	100	35.6098	Misc. feature: contig 2L_1_2 1..50000(1)
2L mapping	81752	SNV	1	A	G	51	100	33.9608	Misc. feature: contig 2L_1_2 1..50000(1)
2L mapping	81785	SNV	1	T	C	50	98	36.6327	Misc. feature: contig 2L_1_2 1..50000(1)
2L mapping	81825	Insertion	1	-	A	39	100	35.6154	Misc. feature: contig 2L_1_2 1..50000(1)
2L mapping	82104	Deletion	1	T	-	38	100	33.5789	Misc. feature: contig 2L_1_2 1..50000(1)
2L mapping	82106	Replacement	3	CAC	T	38	100	34.8333	Misc. feature: contig 2L_1_2 1..50000(1)
2L mapping	82111	SNV	1	T	A	42	100	34.381	Misc. feature: contig 2L_1_2 1..50000(1)
2L mapping	82119	SNV	1	C	T	48	100	35.5417	Misc. feature: contig 2L_1_2 1..50000(1)
2L mapping	83057	SNV	1	A	T	53	92.4528	35.6122	Exon: Exon, Exon: Exon, Gene: FBgn0002931, Misc. feature: contig 2L_1_2 1..50000(1), mRNA: FBgn0002931, mRNA: FBgn0002931
2L mapping	83201	Insertion	1	-	A	39	79.4872	35.5484	Exon: Exon, Exon: Exon, Gene: FBgn0002931, Misc. feature: contig 2L_1_2 1..50000(1), mRNA: FBgn0002931, mRNA: FBgn0002931
2L mapping	84886	SNV	1	T	G	46	100	34.2609	Gene: FBgn0002931, Misc. feature: contig 2L_1_2 1..50000(1)	FBpp0303487:c.[74-609A>C]; FBpp0288762:c.[74-609A>C]
2L mapping	86223	SNV	1	A	G	51	100	35.0392	Gene: FBgn0002931, Misc. feature: contig 2L_1_2 1..50000(1)	FBpp0303487:c.[73+797T>C]; FBpp0288762:c.[73+797T>C]
2L mapping	86402	SNV	1	G	T	37	100	34.2432	Gene: FBgn0002931, Misc. feature: contig 2L_1_2 1..50000(1)	FBpp0303487:c.[73+618C>A]; FBpp0288762:c.[73+618C>A]
2L mapping	86433	SNV	1	A	G	41	100	35.7073	Gene: FBgn0002931, Misc. feature: contig 2L_1_2 1..50000(1)	FBpp0288762:c.[73+587T>C]; FBpp0303487:c.[73+587T>C]
2L mapping	86450	SNV	1	A	C	40	100	34.475	Gene: FBgn0002931, Misc. feature: contig 2L_1_2 1..50000(1)	FBpp0303487:c.[73+570T>G]; FBpp0288762:c.[73+570T>G]
2L mapping	86689	SNV	1	G	A	40	100	31.95	Gene: FBgn0002931, Misc. feature: contig 2L_1_2 1..50000(1)	FBpp0303487:c.[73+331C>T]; FBpp0288762:c.[73+331C>T]
2L mapping	87553	SNV	1	A	G	42	100	32.9524	Misc. feature: contig 2L_1_2 1..50000(1)
2L mapping	88272	Insertion	1	-	G	46	95.6522	35.5455	Misc. feature: contig 2L_1_2 1..50000(1)
2L mapping	88450	SNV	1	T	A	38	100	35.7895	Misc. feature: contig 2L_1_2 1..50000(1)
2L mapping	88453	SNV	1	G	A	39	100	35.359	Misc. feature: contig 2L_1_2 1..50000(1)
2L mapping	88977	SNV	1	A	T	40	92.5	36.1622	Misc. feature: contig 2L_1_2 1..50000(1)
2L mapping	89411	SNV	1	G	T	32	100	35.9688	Misc. feature: contig 2L_1_2 1..50000(1)
2L mapping	90335	SNV	1	A	T	33	100	35.7576	Misc. feature: contig 2L_1_2 1..50000(1)
2L mapping	90798	SNV	1	G	C	47	100	35.0213	Misc. feature: contig 2L_1_2 1..50000(1)
2L mapping	90871	SNV	1	C	A	45	100	36.4667	Misc. feature: contig 2L_1_2 1..50000(1)
2L mapping	91115	SNV	1	C	T	36	100	35.7222	Misc. feature: contig 2L_1_2 1..50000(1)
2L mapping	91130	Deletion	6	TTTGAG	-	30	73.3333	36.1818	Misc. feature: contig 2L_1_2 1..50000(1)
2L mapping	91543	SNV	1	G	C	36	100	32.4444	Misc. feature: contig 2L_1_2 1..50000(1)
2L mapping	91698	SNV	1	A	C	31	100	32.3548	Misc. feature: contig 2L_1_2 1..50000(1)
2L mapping	91806	SNV	1	T	G	42	100	35.3571	Misc. feature: contig 2L_1_2 1..50000(1)
2L mapping	92172	SNV	1	T	C	49	100	34.8571	Misc. feature: contig 2L_1_2 1..50000(1)
2L mapping	92636	SNV	1	C	A	45	97.7778	33.9091	Misc. feature: contig 2L_1_2 1..50000(1)
2L mapping	93510	SNV	1	T	G	47	97.8723	36	Misc. feature: contig 2L_1_2 1..50000(1)
2L mapping	93840	Insertion	1	-	T	48	79.1667	35.6579	Misc. feature: contig 2L_1_2 1..50000(1)
2L mapping	93878	SNV	1	G	C	47	100	30.5532	Misc. feature: contig 2L_1_2 1..50000(1)
2L mapping	94410	SNV	1	T	A	53	100	34.6038	Misc. feature: contig 2L_1_2 1..50000(1)
2L mapping	94588	SNV	1	G	C	24	100	35.8333	Misc. feature: contig 2L_1_2 1..50000(1)
2L mapping	94659	Deletion	1	A	-	37	100	35.3243	Misc. feature: contig 2L_1_2 1..50000(1)
2L mapping	95032	SNV	1	C	A	48	100	34.9375	CDS: FBgn0031216, Exon: Exon, Gene: FBgn0031216, Misc. feature: contig 2L_1_2 1..50000(1), mRNA: FBgn0031216	FBpp0077762:c.85C>A	FBpp0077762:p.Leu29Ile
2L mapping	95341	SNV	1	C	A	45	100	35.5778	Gene: FBgn0031216, Misc. feature: contig 2L_1_2 1..50000(1)	FBpp0077762:c.294-13C>A
2L mapping	97607	SNV	1	T	C	43	100	34.8372	CDS: FBgn0031216, Exon: Exon, Gene: FBgn0031216, Misc. feature: contig 2L_1_2 1..50000(1), mRNA: FBgn0031216	FBpp0077762:c.2547T>C
2L mapping	97872	SNV	1	T	A	42	97.619	34.561	Gene: FBgn0031216, Misc. feature: contig 2L_1_2 1..50000(1)	FBpp0077762:c.2774-12T>A
2L mapping	100206	SNV	1	A	C	38	100	36.0526	CDS: FBgn0031216, Exon: Exon, Gene: FBgn0031216, Misc. feature: contig 2L_1_3 1..50000(1), mRNA: FBgn0031216	FBpp0077762:c.4979A>C	FBpp0077762:p.Lys1660Thr
2L mapping	101742	SNV	1	C	T	42	100	35.6667	Gene: FBgn0031216, Misc. feature: contig 2L_1_3 1..50000(1)	FBpp0077762:c.6152+123C>T
2L mapping	101841	SNV	1	T	A	48	100	34.4375	Gene: FBgn0031216, Misc. feature: contig 2L_1_3 1..50000(1)	FBpp0077762:c.6153-35T>A
2L mapping	101951	SNV	1	T	G	47	97.8723	35.7174	Exon: Exon, Gene: FBgn0031216, Misc. feature: contig 2L_1_3 1..50000(1), mRNA: FBgn0031216
2L mapping	102240	Insertion	2	-	GT	41	82.9268	35.1471	Misc. feature: contig 2L_1_3 1..50000(1)
2L mapping	104207	SNV	1	T	G	52	100	34.1346	Exon: Exon, Gene: FBgn0026787, Misc. feature: contig 2L_1_3 1..50000(1), mRNA: FBgn0026787
2L mapping	104249	SNV	1	A	C	48	100	33.7708	Exon: Exon, Gene: FBgn0026787, Misc. feature: contig 2L_1_3 1..50000(1), mRNA: FBgn0026787
2L mapping	104288	SNV	1	T	C	43	100	35	Exon: Exon, Gene: FBgn0026787, Misc. feature: contig 2L_1_3 1..50000(1), mRNA: FBgn0026787
2L mapping	104361	SNV	1	T	C	42	97.619	35.878	Exon: Exon, Gene: FBgn0026787, Misc. feature: contig 2L_1_3 1..50000(1), mRNA: FBgn0026787
2L mapping	104515	SNV	1	T	G	38	100	33.8684	CDS: FBgn0026787, Exon: Exon, Gene: FBgn0026787, Misc. feature: contig 2L_1_3 1..50000(1), mRNA: FBgn0026787	FBpp0290667:c.1908A>C
2L mapping	106253	SNV	1	T	C	42	95.2381	33.9	CDS: FBgn0026787, Exon: Exon, Gene: FBgn0026787, Misc. feature: contig 2L_1_3 1..50000(1), mRNA: FBgn0026787	FBpp0290667:c.390A>G
2L mapping	106766	SNV	1	G	A	40	100	33.925	Misc. feature: contig 2L_1_3 1..50000(1)
2L mapping	106859	SNV	1	A	G	45	100	34.1333	Misc. feature: contig 2L_1_3 1..50000(1)
2L mapping	107087	Replacement	2	A	TC	21	100	36.2381	Gene: FBgn0005278, Misc. feature: contig 2L_1_3 1..50000(1)
2L mapping	107089	SNV	1	T	G	21	100	35.5238	Gene: FBgn0005278, Misc. feature: contig 2L_1_3 1..50000(1)
2L mapping	107091	Insertion	1	-	G	21	100	34.4762	Gene: FBgn0005278, Misc. feature: contig 2L_1_3 1..50000(1)
2L mapping	107092	SNV	1	G	T	21	100	36.3333	Gene: FBgn0005278, Misc. feature: contig 2L_1_3 1..50000(1)
2L mapping	107094	Insertion	1	-	G	21	100	33.2381	Gene: FBgn0005278, Misc. feature: contig 2L_1_3 1..50000(1)
2L mapping	107157	SNV	1	G	T	41	100	35.2195	Gene: FBgn0005278, Misc. feature: contig 2L_1_3 1..50000(1)
2L mapping	107389	SNV	1	C	T	43	97.6744	34.7143	Gene: FBgn0005278, Misc. feature: contig 2L_1_3 1..50000(1)
2L mapping	107813	SNV	1	T	A	54	100	35.1111	Exon: Exon, Exon: Exon, Exon: Exon, Gene: FBgn0005278, Misc. feature: contig 2L_1_3 1..50000(1), mRNA: FBgn0005278, mRNA: FBgn0005278, mRNA: FBgn0005278, mRNA: FBgn0005278, mRNA: FBgn0005278
2L mapping	107951	SNV	1	G	C	46	100	33.087	Exon: Exon, Exon: Exon, Exon: Exon, Gene: FBgn0005278, Misc. feature: contig 2L_1_3 1..50000(1), mRNA: FBgn0005278, mRNA: FBgn0005278, mRNA: FBgn0005278, mRNA: FBgn0005278
2L mapping	108547	SNV	1	A	G	40	100	34.7	Gene: FBgn0005278, Misc. feature: contig 2L_1_3 1..50000(1)
2L mapping	108968	SNV	1	C	A	41	100	35.439	Gene: FBgn0005278, Misc. feature: contig 2L_1_3 1..50000(1)	FBpp0088926:c.[124+159C>A]; FBpp0088450:c.[124+159C>A]; FBpp0088445:c.[124+159C>A]; FBpp0303506:c.[124+159C>A]; FBpp0300434:c.[124+159C>A]; FBpp0088446:c.[124+159C>A]; FBpp0088449:c.[124+159C>A]; FBpp0088448:c.[124+159C>A]; FBpp0088447:c.[124+159C>A]; FBpp0088451:c.[124+159C>A]; FBpp0088444:c.[124+159C>A]
2L mapping	109015	SNV	1	A	T	39	100	34.5385	Gene: FBgn0005278, Misc. feature: contig 2L_1_3 1..50000(1)	FBpp0088448:c.[124+206A>T]; FBpp0088449:c.[124+206A>T]; FBpp0088445:c.[124+206A>T]; FBpp0088450:c.[124+206A>T]; FBpp0088444:c.[124+206A>T]; FBpp0088447:c.[124+206A>T]; FBpp0300434:c.[124+206A>T]; FBpp0088926:c.[124+206A>T]; FBpp0088446:c.[124+206A>T]; FBpp0303506:c.[124+206A>T]; FBpp0088451:c.[124+206A>T]
2L mapping	109048	SNV	1	C	T	42	100	34.9762	Gene: FBgn0005278, Misc. feature: contig 2L_1_3 1..50000(1)	FBpp0303506:c.[124+239C>T]; FBpp0088444:c.[124+239C>T]; FBpp0088449:c.[124+239C>T]; FBpp0088448:c.[124+239C>T]; FBpp0088447:c.[124+239C>T]; FBpp0088450:c.[124+239C>T]; FBpp0300434:c.[124+239C>T]; FBpp0088445:c.[124+239C>T]; FBpp0088926:c.[124+239C>T]; FBpp0088446:c.[124+239C>T]; FBpp0088451:c.[124+239C>T]
2L mapping	109168	Deletion	12	CCGGTGACCAAG	-	40	60	31.4583	Gene: FBgn0005278, Misc. feature: contig 2L_1_3 1..50000(1)	FBpp0303506:c.[124+359_124+370delCCGGTGACCAAG]; FBpp0088449:c.[124+359_124+370delCCGGTGACCAAG]; FBpp0088926:c.[124+359_124+370delCCGGTGACCAAG]; FBpp0300434:c.[124+359_124+370delCCGGTGACCAAG]; FBpp0088450:c.[124+359_124+370delCCGGTGACCAAG]; FBpp0088444:c.[124+359_124+370delCCGGTGACCAAG]; FBpp0088445:c.[124+359_124+370delCCGGTGACCAAG]; FBpp0088446:c.[124+359_124+370delCCGGTGACCAAG]; FBpp0088448:c.[…
2L mapping	109562	SNV	1	C	G	56	100	35.5357	Gene: FBgn0005278, Misc. feature: contig 2L_1_3 1..50000(1)	FBpp0088444:c.[124+753C>G]; FBpp0303506:c.[124+753C>G]; FBpp0088449:c.[124+753C>G]; FBpp0088448:c.[124+753C>G]; FBpp0300434:c.[124+753C>G]; FBpp0088926:c.[124+753C>G]; FBpp0088450:c.[124+753C>G]; FBpp0088446:c.[124+753C>G]; FBpp0088445:c.[124+753C>G]; FBpp0088451:c.[124+753C>G]; FBpp0088447:c.[124+753C>G]
2L mapping	110212	SNV	1	T	G	42	100	34.5	Gene: FBgn0005278, Misc. feature: contig 2L_1_3 1..50000(1)	FBpp0088449:c.[125-194T>G]; FBpp0088452:c.[44-194T>G]; FBpp0088447:c.[125-194T>G]; FBpp0088444:c.[125-194T>G]; FBpp0088926:c.[125-194T>G]; FBpp0088446:c.[125-194T>G]; FBpp0088445:c.[125-194T>G]; FBpp0088451:c.[125-194T>G]; FBpp0088448:c.[125-194T>G]; FBpp0300434:c.[125-194T>G]; FBpp0088450:c.[125-194T>G]; FBpp0303506:c.[125-194T>G]
2L mapping	110539	SNV	1	A	G	41	100	35.439	Gene: FBgn0005278, Misc. feature: contig 2L_1_3 1..50000(1)	FBpp0088444:c.[202+56A>G]; FBpp0088452:c.[121+56A>G]; FBpp0303506:c.[202+56A>G]; FBpp0088451:c.[202+56A>G]; FBpp0088450:c.[202+56A>G]; FBpp0088449:c.[202+56A>G]; FBpp0088445:c.[202+56A>G]; FBpp0088447:c.[202+56A>G]; FBpp0300434:c.[202+56A>G]; FBpp0088446:c.[202+56A>G]; FBpp0088926:c.[202+56A>G]; FBpp0088448:c.[202+56A>G]
2L mapping	111262	SNV	1	A	G	60	98.3333	34.7119	Exon: Exon, Gene: FBgn0005278, Misc. feature: contig 2L_1_3 1..50000(1), mRNA: FBgn0005278	FBpp0088444:c.[438+145A>G]; FBpp0088452:c.[357+145A>G]; FBpp0088446:c.[325+385A>G]; FBpp0088449:c.[325+385A>G]; FBpp0088451:c.[438+145A>G]; FBpp0303506:c.[325+385A>G]; FBpp0088445:c.[325+385A>G]; FBpp0088447:c.[438+145A>G]; FBpp0088450:c.[325+385A>G]; FBpp0088926:c.[325+385A>G]; FBpp0088448:c.[325+385A>G]
2L mapping	111525	SNV	1	T	C	51	100	36.0392	Gene: FBgn0005278, Misc. feature: contig 2L_1_3 1..50000(1)	FBpp0088448:c.[326-382T>C]; FBpp0088452:c.[357+408T>C]; FBpp0303506:c.[325+648T>C]; FBpp0088447:c.[438+408T>C]; FBpp0088451:c.[438+408T>C]; FBpp0088449:c.[326-382T>C]; FBpp0088926:c.[326-382T>C]; FBpp0088445:c.[326-382T>C]; FBpp0088450:c.[326-382T>C]; FBpp0088446:c.[326-382T>C]; FBpp0088444:c.[439-382T>C]
2L mapping	111546	MNV	2	CC	AT	44	100	35.8409	Gene: FBgn0005278, Misc. feature: contig 2L_1_3 1..50000(1)	FBpp0088447:c.[438+429_438+430delCCinsAT]; FBpp0088451:c.[438+429_438+430delCCinsAT]; FBpp0088445:c.[326-361_326-360delCCinsAT]; FBpp0303506:c.[325+669_325+670delCCinsAT]; FBpp0088444:c.[439-361_439-360delCCinsAT]; FBpp0088450:c.[326-361_326-360delCCinsAT]; FBpp0088926:c.[326-361_326-360delCCinsAT]; FBpp0088452:c.[357+429_357+430delCCinsAT]; FBpp0088449:c.[326-361_326-360delCCinsAT]; FBpp0088446:…
2L mapping	111618	Deletion	10	AGACTTTGGT	-	33	72.7273	36.8333	Gene: FBgn0005278, Misc. feature: contig 2L_1_3 1..50000(1)	FBpp0088445:c.[326-289_326-280delAGACTTTGGT]; FBpp0088452:c.[357+501_357+510delAGACTTTGGT]; FBpp0088447:c.[438+501_438+510delAGACTTTGGT]; FBpp0088451:c.[438+501_438+510delAGACTTTGGT]; FBpp0088926:c.[326-289_326-280delAGACTTTGGT]; FBpp0088449:c.[326-289_326-280delAGACTTTGGT]; FBpp0088446:c.[326-289_326-280delAGACTTTGGT]; FBpp0088448:c.[326-289_326-280delAGACTTTGGT]; FBpp0088444:c.[439-289_439-280d…
2L mapping	112627	SNV	1	A	T	53	100	35.0189	Gene: FBgn0005278, Misc. feature: contig 2L_1_3 1..50000(1)	FBpp0088444:c.[552-63A>T]; FBpp0088926:c.[439-63A>T]; FBpp0088449:c.[439-63A>T]; FBpp0088450:c.[439-63A>T]; FBpp0088446:c.[439-63A>T]; FBpp0088448:c.[439-63A>T]; FBpp0088445:c.[439-63A>T]; FBpp0303506:c.[326-63A>T]; FBpp0088452:c.[358-63A>T]; FBpp0088447:c.[439-63A>T]; FBpp0088451:c.[439-63A>T]
2L mapping	112636	SNV	1	G	T	53	100	34.6226	Gene: FBgn0005278, Misc. feature: contig 2L_1_3 1..50000(1)	FBpp0303506:c.[326-54G>T]; FBpp0088450:c.[439-54G>T]; FBpp0088446:c.[439-54G>T]; FBpp0088445:c.[439-54G>T]; FBpp0088449:c.[439-54G>T]; FBpp0088451:c.[439-54G>T]; FBpp0088444:c.[552-54G>T]; FBpp0088926:c.[439-54G>T]; FBpp0088452:c.[358-54G>T]; FBpp0088447:c.[439-54G>T]; FBpp0088448:c.[439-54G>T]
2L mapping	113415	SNV	1	T	G	55	100	33.3091	Gene: FBgn0005278, Misc. feature: contig 2L_1_3 1..50000(1)	FBpp0088449:c.[1119-19T>G]; FBpp0088451:c.[1119-19T>G]; FBpp0088448:c.[1119-19T>G]; FBpp0088445:c.[1119-19T>G]; FBpp0088450:c.[1119-19T>G]; FBpp0088446:c.[1119-19T>G]; FBpp0088447:c.[1119-19T>G]; FBpp0088926:c.[1119-19T>G]; FBpp0088452:c.[1038-19T>G]
2L mapping	113831	SNV	1	A	T	38	100	36.6316	Exon: Exon, Exon: Exon, Exon: Exon, Exon: Exon, Gene: FBgn0005278, Misc. feature: contig 2L_1_3 1..50000(1), mRNA: FBgn0005278, mRNA: FBgn0005278, mRNA: FBgn0005278, mRNA: FBgn0005278, mRNA: FBgn0005278, mRNA: FBgn0005278, mRNA: FBgn0005278, mRNA: FBgn0005278, mRNA: FBgn0005278, mRNA: FBgn0005278, mRNA: FBgn0005278
2L mapping	114004	SNV	1	T	A	54	100	35.9815	Exon: Exon, Exon: Exon, Exon: Exon, Exon: Exon, Gene: FBgn0005278, Misc. feature: contig 2L_1_3 1..50000(1), mRNA: FBgn0005278, mRNA: FBgn0005278, mRNA: FBgn0005278, mRNA: FBgn0005278, mRNA: FBgn0005278, mRNA: FBgn0005278, mRNA: FBgn0005278, mRNA: FBgn0005278, mRNA: FBgn0005278, mRNA: FBgn0005278, mRNA: FBgn0005278
2L mapping	114738	SNV	1	G	T	41	100	34.1951	Exon: Exon, Gene: FBgn0031228, Misc. feature: contig 2L_1_3 1..50000(1), mRNA: FBgn0031228, mRNA: FBgn0031228, mRNA: FBgn0031228
2L mapping	114862	SNV	1	A	G	39	100	34.2564	Exon: Exon, Gene: FBgn0031228, Misc. feature: contig 2L_1_3 1..50000(1), mRNA: FBgn0031228, mRNA: FBgn0031228, mRNA: FBgn0031228
2L mapping	115195	SNV	1	A	T	39	100	36.0256	Gene: FBgn0031228, Misc. feature: contig 2L_1_3 1..50000(1)
2L mapping	115359	SNV	1	A	G	49	100	36.0816	Gene: FBgn0031228, Misc. feature: contig 2L_1_3 1..50000(1)
2L mapping	115754	SNV	1	C	G	42	100	34.4286	CDS: FBgn0031219, CDS: FBgn0031219, Exon: Exon, Exon: Exon, Gene: FBgn0031228, Gene: FBgn0031219, Misc. feature: contig 2L_1_3 1..50000(1), mRNA: FBgn0031219, mRNA: FBgn0031219	FBpp0307800:c.[364G>C]; FBpp0077818:c.[364G>C]	FBpp0307800:p.[Val122Leu]; FBpp0077818:p.[Val122Leu]
2L mapping	116032	SNV	1	C	T	37	100	35.2703	CDS: FBgn0031219, CDS: FBgn0031219, Exon: Exon, Exon: Exon, Gene: FBgn0031228, Gene: FBgn0031219, Misc. feature: contig 2L_1_3 1..50000(1), mRNA: FBgn0031219, mRNA: FBgn0031219	FBpp0077818:c.[86G>A]; FBpp0307800:c.[86G>A]	FBpp0077818:p.[Arg29Lys]; FBpp0307800:p.[Arg29Lys]
2L mapping	116183	SNV	1	A	T	30	100	35.2	Exon: Exon, Gene: FBgn0031228, Gene: FBgn0031219, Misc. feature: contig 2L_1_3 1..50000(1), mRNA: FBgn0031219
2L mapping	116354	SNV	1	A	C	42	100	34.4048	Exon: Exon, Gene: FBgn0031228, Gene: FBgn0031219, Misc. feature: contig 2L_1_3 1..50000(1), mRNA: FBgn0031219
2L mapping	116591	SNV	1	C	A	33	100	34.2121	Gene: FBgn0031228, Misc. feature: contig 2L_1_3 1..50000(1)
2L mapping	116793	SNV	1	T	C	35	100	34.8	Gene: FBgn0031228, Misc. feature: contig 2L_1_3 1..50000(1)
2L mapping	116801	Insertion	1	-	A	38	100	35.9737	Gene: FBgn0031228, Misc. feature: contig 2L_1_3 1..50000(1)
2L mapping	116812	SNV	1	C	T	40	100	34.175	Gene: FBgn0031228, Misc. feature: contig 2L_1_3 1..50000(1)
2L mapping	116857	SNV	1	T	G	46	97.8261	34.3778	Gene: FBgn0031228, Misc. feature: contig 2L_1_3 1..50000(1)
2L mapping	116887	SNV	1	A	G	52	100	34.3462	Gene: FBgn0031228, Misc. feature: contig 2L_1_3 1..50000(1)
2L mapping	116906	SNV	1	G	A	54	98.1481	35.0377	Gene: FBgn0031228, Misc. feature: contig 2L_1_3 1..50000(1)
2L mapping	116946	SNV	1	T	G	54	100	35.7037	Gene: FBgn0031228, Misc. feature: contig 2L_1_3 1..50000(1)
2L mapping	117028	SNV	1	A	G	57	100	34.4035	Exon: Exon, Gene: FBgn0031228, Gene: FBgn0031220, Misc. feature: contig 2L_1_3 1..50000(1), mRNA: FBgn0031220
2L mapping	117109	SNV	1	T	A	55	100	35.4909	Exon: Exon, Exon: Exon, Exon: Exon, Gene: FBgn0031228, Gene: FBgn0031220, Misc. feature: contig 2L_1_3 1..50000(1), mRNA: FBgn0031220, mRNA: FBgn0031220, mRNA: FBgn0031220, mRNA: FBgn0031220, mRNA: FBgn0031220, mRNA: FBgn0031220, mRNA: FBgn0031220, mRNA: FBgn0031220
2L mapping	117526	SNV	1	C	T	54	100	34.5	CDS: FBgn0031220, CDS: FBgn0031220, CDS: FBgn0031220, CDS: FBgn0031220, CDS: FBgn0031220, CDS: FBgn0031220, Exon: Exon, Exon: Exon, Exon: Exon, Exon: Exon, Gene: FBgn0031228, Gene: FBgn0031220, Misc. feature: contig 2L_1_3 1..50000(1), mRNA: FBgn0031220, mRNA: FBgn0031220, mRNA: FBgn0031220, mRNA: FBgn0031220, mRNA: FBgn0031220, mRNA: FBgn0031220, mRNA: FBgn0031220, mRNA: FBgn0031220, mRNA: FBgn0…	FBpp0077814:c.[1839G>A]; FBpp0077816:c.[1839G>A]; FBpp0077817:c.[1839G>A]; FBpp0077815:c.[1839G>A]; FBpp0099713:c.[1839G>A]; FBpp0099712:c.[1839G>A]
2L mapping	118851	SNV	1	G	A	45	100	35.6444	CDS: FBgn0031220, CDS: FBgn0031220, CDS: FBgn0031220, CDS: FBgn0031220, CDS: FBgn0031220, CDS: FBgn0031220, Exon: Exon, Exon: Exon, Gene: FBgn0031228, Gene: FBgn0031220, Misc. feature: contig 2L_1_3 1..50000(1), mRNA: FBgn0031220, mRNA: FBgn0031220, mRNA: FBgn0031220, mRNA: FBgn0031220, mRNA: FBgn0031220, mRNA: FBgn0031220, mRNA: FBgn0031220, mRNA: FBgn0031220, mRNA: FBgn0031220	FBpp0077815:c.[689C>T]; FBpp0099712:c.[689C>T]; FBpp0099713:c.[689C>T]; FBpp0077817:c.[689C>T]; FBpp0077816:c.[689C>T]; FBpp0077814:c.[689C>T]	FBpp0077815:p.[Ser230Leu]; FBpp0099712:p.[Ser230Leu]; FBpp0099713:p.[Ser230Leu]; FBpp0077817:p.[Ser230Leu]; FBpp0077816:p.[Ser230Leu]; FBpp0077814:p.[Ser230Leu]
2L mapping	119610	SNV	1	G	T	41	100	35.1463	Gene: FBgn0031228, Gene: FBgn0031220, Misc. feature: contig 2L_1_3 1..50000(1)	FBpp0077814:c.[206-56C>A]; FBpp0099714:c.[206-56C>A]; FBpp0099713:c.[206-56C>A]; FBpp0303496:c.[206-56C>A]; FBpp0077815:c.[206-56C>A]; FBpp0099715:c.[206-56C>A]; FBpp0077816:c.[206-56C>A]; FBpp0077817:c.[206-56C>A]; FBpp0099712:c.[206-56C>A]
2L mapping	120530	SNV	1	T	C	48	100	35.4167	Exon: Exon, Exon: Exon, Exon: Exon, Exon: Exon, Exon: Exon, Gene: FBgn0031228, Gene: FBgn0031220, Misc. feature: contig 2L_1_3 1..50000(1), mRNA: FBgn0031220, mRNA: FBgn0031220, mRNA: FBgn0031220, mRNA: FBgn0031220, mRNA: FBgn0031220, mRNA: FBgn0031220, mRNA: FBgn0031220, mRNA: FBgn0031220
2L mapping	120995	SNV	1	C	T	39	97.4359	34.8684	Exon: Exon, Gene: FBgn0031228, Gene: FBgn0031220, Misc. feature: contig 2L_1_3 1..50000(1), mRNA: FBgn0031220
2L mapping	121668	Deletion	1	T	-	40	90	35.1944	Exon: Exon, Exon: Exon, Gene: FBgn0031228, Gene: FBgn0031220, Misc. feature: contig 2L_1_3 1..50000(1), mRNA: FBgn0031220, mRNA: FBgn0031220
2L mapping	121830	SNV	1	G	A	51	100	33.9804	Gene: FBgn0031228, Misc. feature: contig 2L_1_3 1..50000(1)
2L mapping	122128	SNV	1	T	C	50	100	35	Gene: FBgn0031228, Misc. feature: contig 2L_1_3 1..50000(1)
2L mapping	123591	SNV	1	A	G	41	100	35.6585	Misc. RNA: FBgn0266304, CDS: FBgn0025683, CDS: FBgn0025683, CDS: FBgn0025683, CDS: FBgn0025683, Exon: Exon, Exon: Exon, Exon: Exon, Gene: FBgn0031228, Gene: FBgn0025683, Gene: FBgn0266304, Misc. feature: contig 2L_1_3 1..50000(1), mRNA: FBgn0025683, mRNA: FBgn0025683, mRNA: FBgn0025683, mRNA: FBgn0025683	FBpp0089109:c.[1638T>C]; FBpp0077812:c.[1638T>C]; FBpp0077813:c.[1635T>C]; FBpp0099791:c.[1635T>C]
2L mapping	123820	SNV	1	A	C	42	100	33.4286	Misc. RNA: FBgn0266304, Exon: Exon, Gene: FBgn0031228, Gene: FBgn0025683, Gene: FBgn0266304, Misc. feature: contig 2L_1_3 1..50000(1)	FBpp0077812:c.[1499-26T>G]; FBpp0099791:c.[1496-26T>G]; FBpp0077813:c.[1496-26T>G]; FBpp0089109:c.[1499-26T>G]
2L mapping	125382	Deletion	1	T	-	53	75.4717	34.325	Gene: FBgn0031228, Gene: FBgn0025683, Misc. feature: contig 2L_1_3 1..50000(1)	FBpp0077813:c.[303-116delA]; FBpp0089109:c.[306-116delA]; FBpp0077812:c.[306-116delA]; FBpp0099791:c.[303-116delA]
2L mapping	125739	Insertion	7	-	TGAAAGG	42	42.8571	34.0159	Gene: FBgn0031228, Gene: FBgn0025683, Misc. feature: contig 2L_1_3 1..50000(1)	FBpp0077813:c.[302+371_302+372insCCTTTCA]; FBpp0077812:c.[305+371_305+372insCCTTTCA]; FBpp0099791:c.[302+371_302+372insCCTTTCA]; FBpp0089109:c.[305+371_305+372insCCTTTCA]
2L mapping	126347	SNV	1	T	C	54	100	35.3889	Gene: FBgn0031228, Gene: FBgn0025683, Misc. feature: contig 2L_1_3 1..50000(1)	FBpp0077812:c.[188-120A>G]; FBpp0099791:c.[185-120A>G]; FBpp0089109:c.[188-120A>G]; FBpp0077813:c.[185-120A>G]
2L mapping	126531	SNV	1	G	A	38	100	35.4211	Gene: FBgn0031228, Gene: FBgn0025683, Misc. feature: contig 2L_1_3 1..50000(1)	FBpp0089109:c.[188-304C>T]; FBpp0099791:c.[185-304C>T]; FBpp0077813:c.[185-304C>T]; FBpp0077812:c.[188-304C>T]
2L mapping	126875	SNV	1	A	G	46	100	34.9783	Gene: FBgn0031228, Gene: FBgn0025683, Misc. feature: contig 2L_1_3 1..50000(1)	FBpp0099791:c.[185-648T>C]; FBpp0077813:c.[185-648T>C]; FBpp0089109:c.[188-648T>C]; FBpp0077812:c.[188-648T>C]
2L mapping	127299	SNV	1	C	A	34	97.0588	35.7576	Gene: FBgn0031228, Gene: FBgn0025683, Misc. feature: contig 2L_1_3 1..50000(1)	FBpp0077813:c.[185-1072G>T]; FBpp0089109:c.[188-1072G>T]; FBpp0099791:c.[185-1072G>T]; FBpp0077812:c.[188-1072G>T]
2L mapping	127497	SNV	1	C	T	36	100	33.9444	Gene: FBgn0031228, Gene: FBgn0025683, Misc. feature: contig 2L_1_3 1..50000(1)	FBpp0089109:c.[188-1270G>A]; FBpp0077812:c.[188-1270G>A]; FBpp0077813:c.[185-1270G>A]; FBpp0099791:c.[185-1270G>A]
2L mapping	127805	SNV	1	A	T	39	100	33.6667	Gene: FBgn0031228, Gene: FBgn0025683, Misc. feature: contig 2L_1_3 1..50000(1)	FBpp0089109:c.[187+995T>A]; FBpp0077813:c.[184+995T>A]; FBpp0077812:c.[187+995T>A]; FBpp0099791:c.[184+995T>A]
2L mapping	128075	Insertion	2	-	TG	40	55	32.2273	Gene: FBgn0031228, Gene: FBgn0025683, Misc. feature: contig 2L_1_3 1..50000(1)	FBpp0099791:c.[184+725_184+726insCA]; FBpp0077812:c.[187+725_187+726insCA]; FBpp0077813:c.[184+725_184+726insCA]; FBpp0089109:c.[187+725_187+726insCA]
2L mapping	128173	Insertion	3	-	AAA	35	54.2857	35.807	Gene: FBgn0031228, Gene: FBgn0025683, Misc. feature: contig 2L_1_3 1..50000(1)	FBpp0077812:c.[187+627_187+628insTTT]; FBpp0077813:c.[184+627_184+628insTTT]; FBpp0089109:c.[187+627_187+628insTTT]; FBpp0099791:c.[184+627_184+628insTTT]
2L mapping	128199	SNV	1	C	A	34	100	32.6765	Gene: FBgn0031228, Gene: FBgn0025683, Misc. feature: contig 2L_1_3 1..50000(1)	FBpp0077813:c.[184+601G>T]; FBpp0099791:c.[184+601G>T]; FBpp0077812:c.[187+601G>T]; FBpp0089109:c.[187+601G>T]
2L mapping	129319	SNV	1	A	G	48	97.9167	34.5106	Gene: FBgn0031228, Gene: FBgn0025683, Misc. feature: contig 2L_1_3 1..50000(1)	FBpp0089109:c.[45-377T>C]; FBpp0077812:c.[45-377T>C]
2L mapping	129720	SNV	1	A	C	61	100	34.7705	Gene: FBgn0031228, Gene: FBgn0025683, Misc. feature: contig 2L_1_3 1..50000(1)	FBpp0077812:c.[45-778T>G]; FBpp0089109:c.[45-778T>G]
2L mapping	130033	SNV	1	G	A	47	100	36.2766	Gene: FBgn0031228, Gene: FBgn0025683, Misc. feature: contig 2L_1_3 1..50000(1)	FBpp0089109:c.[44+475C>T]; FBpp0077812:c.[44+475C>T]
2L mapping	130303	SNV	1	G	T	58	100	35.2586	Gene: FBgn0031228, Gene: FBgn0025683, Misc. feature: contig 2L_1_3 1..50000(1)	FBpp0089109:c.[44+205C>A]; FBpp0077812:c.[44+205C>A]
2L mapping	130431	SNV	1	C	G	48	93.75	35.6	Gene: FBgn0031228, Gene: FBgn0025683, Misc. feature: contig 2L_1_3 1..50000(1)	FBpp0089109:c.[44+77G>C]; FBpp0077812:c.[44+77G>C]
2L mapping	131023	SNV	1	T	G	47	95.7447	35.1778	Gene: FBgn0031228, Misc. feature: contig 2L_1_3 1..50000(1)
2L mapping	132036	SNV	1	A	G	40	100	33.325	Gene: FBgn0031228, Misc. feature: contig 2L_1_3 1..50000(1)
2L mapping	132377	Deletion	1	A	-	42	97.619	35.4146	Exon: Exon, Gene: FBgn0031228, Gene: FBgn0001142, Misc. feature: contig 2L_1_3 1..50000(1), mRNA: FBgn0001142
2L mapping	132420	SNV	1	C	G	45	95.5556	33.1628	Exon: Exon, Gene: FBgn0031228, Gene: FBgn0001142, Misc. feature: contig 2L_1_3 1..50000(1), mRNA: FBgn0001142
2L mapping	132590	SNV	1	G	A	39	100	34.641	CDS: FBgn0001142, CDS: FBgn0001142, CDS: FBgn0001142, Exon: Exon, Exon: Exon, Exon: Exon, Gene: FBgn0031228, Gene: FBgn0001142, Misc. feature: contig 2L_1_3 1..50000(1), mRNA: FBgn0001142, mRNA: FBgn0001142, mRNA: FBgn0001142	FBpp0077773:c.[108G>A]; FBpp0077774:c.[108G>A]; FBpp0289795:c.[108G>A]
2L mapping	134664	SNV	1	G	C	64	100	35.5938	Gene: FBgn0031228, Misc. feature: contig 2L_1_3 1..50000(1)
2L mapping	134871	SNV	1	G	A	48	100	34.2083	Gene: FBgn0031228, Misc. feature: contig 2L_1_3 1..50000(1)
2L mapping	135012	SNV	1	G	T	57	98.2456	35.4821	Gene: FBgn0031228, Misc. feature: contig 2L_1_3 1..50000(1)
2L mapping	135084	SNV	1	T	A	53	100	34.7547	Gene: FBgn0031228, Misc. feature: contig 2L_1_3 1..50000(1)
2L mapping	135369	SNV	1	T	A	45	100	34.8444	Gene: FBgn0031228, Misc. feature: contig 2L_1_3 1..50000(1)
2L mapping	135371	SNV	1	A	G	45	100	34.2667	Gene: FBgn0031228, Misc. feature: contig 2L_1_3 1..50000(1)
2L mapping	135422	SNV	1	A	G	43	100	34.8837	Misc. RNA: FBgn0265074, Exon: Exon, Gene: FBgn0031228, Gene: FBgn0265074, Misc. feature: contig 2L_1_3 1..50000(1)
2L mapping	135844	SNV	1	C	A	48	100	34.75	Misc. RNA: FBgn0265074, Exon: Exon, Gene: FBgn0031228, Gene: FBgn0265074, Misc. feature: contig 2L_1_3 1..50000(1)
2L mapping	135931	SNV	1	A	G	58	100	35.7759	Misc. RNA: FBgn0265074, Exon: Exon, Gene: FBgn0031228, Gene: FBgn0265074, Misc. feature: contig 2L_1_3 1..50000(1)
2L mapping	136169	SNV	1	T	A	45	100	36.4	Misc. RNA: FBgn0265075, Exon: Exon, Gene: FBgn0031228, Gene: FBgn0265075, Misc. feature: contig 2L_1_3 1..50000(1)
2L mapping	136475	SNV	1	T	C	47	97.8723	31.4783	Misc. RNA: FBgn0265075, Exon: Exon, Gene: FBgn0031228, Gene: FBgn0265075, Misc. feature: contig 2L_1_3 1..50000(1)
2L mapping	136655	SNV	1	G	A	38	100	34.2895	Misc. RNA: FBgn0265075, Exon: Exon, Gene: FBgn0031228, Gene: FBgn0265075, Misc. feature: contig 2L_1_3 1..50000(1)
2L mapping	137023	Deletion	1	T	-	36	75	30.0741	Gene: FBgn0031228, Misc. feature: contig 2L_1_3 1..50000(1)
2L mapping	137303	SNV	1	G	A	56	100	33.8393	Gene: FBgn0031228, Misc. feature: contig 2L_1_3 1..50000(1)
2L mapping	138313	SNV	1	T	C	44	100	34.9318	Gene: FBgn0031228, Misc. feature: contig 2L_1_3 1..50000(1)
2L mapping	138350	SNV	1	A	G	40	100	35	Gene: FBgn0031228, Misc. feature: contig 2L_1_3 1..50000(1)
2L mapping	138936	SNV	1	T	C	44	100	36.1818	CDS: FBgn0051976, CDS: FBgn0051976, Exon: Exon, Exon: Exon, Gene: FBgn0031228, Gene: FBgn0051975, Gene: FBgn0051976, Misc. feature: contig 2L_1_3 1..50000(1), mRNA: FBgn0051975, mRNA: FBgn0051976, mRNA: FBgn0051976	FBpp0291404:c.[344A>G]; FBpp0311956:c.[344A>G]	FBpp0291404:p.[Asn115Ser]; FBpp0311956:p.[Asn115Ser]
2L mapping	139376	SNV	1	T	C	43	100	32.7674	Exon: Exon, Exon: Exon, Gene: FBgn0031228, Gene: FBgn0051975, Gene: FBgn0051976, Misc. feature: contig 2L_1_3 1..50000(1), mRNA: FBgn0051975, mRNA: FBgn0051976, mRNA: FBgn0051976
2L mapping	139426	SNV	1	G	T	42	100	35.9762	Gene: FBgn0031228, Gene: FBgn0051975, Gene: FBgn0051976, Misc. feature: contig 2L_1_3 1..50000(1)
2L mapping	139579	SNV	1	C	G	55	100	35.2	CDS: FBgn0051975, CDS: FBgn0051975, Exon: Exon, Exon: Exon, Exon: Exon, Exon: Exon, Gene: FBgn0031228, Gene: FBgn0051975, Gene: FBgn0051976, Misc. feature: contig 2L_1_3 1..50000(1), mRNA: FBgn0051975, mRNA: FBgn0051975, mRNA: FBgn0051976, mRNA: FBgn0051976	FBpp0291405:c.[1143G>C]; FBpp0291406:c.[1143G>C]	FBpp0291405:p.[Glu381Asp]; FBpp0291406:p.[Glu381Asp]
2L mapping	140689	SNV	1	T	C	24	100	35.125	CDS: FBgn0051975, CDS: FBgn0051975, Exon: Exon, Exon: Exon, Gene: FBgn0031228, Gene: FBgn0051975, Gene: FBgn0051976, Misc. feature: contig 2L_1_3 1..50000(1), mRNA: FBgn0051975, mRNA: FBgn0051975, mRNA: FBgn0051976	FBpp0291406:c.[245A>G]; FBpp0291405:c.[245A>G]	FBpp0291406:p.[Gln82Arg]; FBpp0291405:p.[Gln82Arg]
2L mapping	140855	SNV	1	T	A	36	100	33.9722	CDS: FBgn0051975, CDS: FBgn0051975, Exon: Exon, Exon: Exon, Gene: FBgn0031228, Gene: FBgn0051975, Gene: FBgn0051976, Misc. feature: contig 2L_1_3 1..50000(1), mRNA: FBgn0051975, mRNA: FBgn0051975, mRNA: FBgn0051976	FBpp0291406:c.[79A>T]; FBpp0291405:c.[79A>T]	FBpp0291406:p.[Asn27Tyr]; FBpp0291405:p.[Asn27Tyr]
2L mapping	141836	SNV	1	A	G	31	100	34.6452	CDS: FBgn0051974, CDS: FBgn0051974, CDS: FBgn0051974, Exon: Exon, Exon: Exon, Exon: Exon, Gene: FBgn0031228, Gene: FBgn0051974, Misc. feature: contig 2L_1_3 1..50000(1), mRNA: FBgn0051974, mRNA: FBgn0051974, mRNA: FBgn0051974	FBpp0303494:c.[652T>C]; FBpp0290209:c.[652T>C]; FBpp0303495:c.[652T>C]
2L mapping	142974	Insertion	3	-	CCT	43	86.0465	34.8198	Exon: Exon, Exon: Exon, Gene: FBgn0031228, Gene: FBgn0051974, Misc. feature: contig 2L_1_3 1..50000(1), mRNA: FBgn0051974, mRNA: FBgn0051974
2L mapping	143327	SNV	1	C	T	41	100	34.0732	Exon: Exon, Gene: FBgn0031228, Gene: FBgn0031224, Misc. feature: contig 2L_1_3 1..50000(1), mRNA: FBgn0031224
2L mapping	143354	Deletion	2	TG	-	33	84.8485	32.2143	Exon: Exon, Gene: FBgn0031228, Gene: FBgn0031224, Misc. feature: contig 2L_1_3 1..50000(1), mRNA: FBgn0031224
2L mapping	143602	SNV	1	G	C	29	100	35.3103	CDS: FBgn0031224, Exon: Exon, Gene: FBgn0031228, Gene: FBgn0031224, Misc. feature: contig 2L_1_3 1..50000(1), mRNA: FBgn0031224	FBpp0077775:c.225G>C
2L mapping	143758	SNV	1	A	G	39	100	34.2821	CDS: FBgn0031224, Exon: Exon, Gene: FBgn0031228, Gene: FBgn0031224, Misc. feature: contig 2L_1_3 1..50000(1), mRNA: FBgn0031224	FBpp0077775:c.381A>G
2L mapping	143908	SNV	1	A	C	38	97.3684	34	CDS: FBgn0031224, Exon: Exon, Gene: FBgn0031228, Gene: FBgn0031224, Misc. feature: contig 2L_1_3 1..50000(1), mRNA: FBgn0031224	FBpp0077775:c.531A>C
2L mapping	144125	SNV	1	C	G	52	98.0769	34.3725	Exon: Exon, Gene: FBgn0031228, Gene: FBgn0031224, Misc. feature: contig 2L_1_3 1..50000(1), mRNA: FBgn0031224
2L mapping	144142	SNV	1	C	T	60	100	35.3167	Exon: Exon, Gene: FBgn0031228, Gene: FBgn0031224, Misc. feature: contig 2L_1_3 1..50000(1), mRNA: FBgn0031224
2L mapping	144188	SNV	1	T	G	54	100	34	Exon: Exon, Gene: FBgn0031228, Gene: FBgn0031224, Misc. feature: contig 2L_1_3 1..50000(1), mRNA: FBgn0031224
2L mapping	145999	SNV	1	T	A	46	100	32.587	Gene: FBgn0031228, Gene: FBgn0259818, Misc. feature: contig 2L_1_3 1..50000(1)	FBpp0303493:c.[3426-89A>T]; FBpp0291141:c.[3432-89A>T]
2L mapping	146738	Insertion	1	-	C	37	89.1892	35.0909	Gene: FBgn0031228, Gene: FBgn0259818, Misc. feature: contig 2L_1_3 1..50000(1)	FBpp0291141:c.[3431+611_3431+612insG]; FBpp0303493:c.[3425+617_3425+618insG]
2L mapping	146768	SNV	1	T	G	45	100	35.0444	Gene: FBgn0031228, Gene: FBgn0259818, Misc. feature: contig 2L_1_3 1..50000(1)	FBpp0291141:c.[3431+581A>C]; FBpp0303493:c.[3425+587A>C]
2L mapping	146927	SNV	1	C	T	47	97.8723	35.2826	Gene: FBgn0031228, Gene: FBgn0259818, Misc. feature: contig 2L_1_3 1..50000(1)	FBpp0291141:c.[3431+422G>A]; FBpp0303493:c.[3425+428G>A]
2L mapping	146987	SNV	1	G	A	41	97.561	35.875	Gene: FBgn0031228, Gene: FBgn0259818, Misc. feature: contig 2L_1_3 1..50000(1)	FBpp0303493:c.[3425+368C>T]; FBpp0291141:c.[3431+362C>T]
2L mapping	146997	SNV	1	A	T	45	97.7778	36.0682	Gene: FBgn0031228, Gene: FBgn0259818, Misc. feature: contig 2L_1_3 1..50000(1)	FBpp0291141:c.[3431+352T>A]; FBpp0303493:c.[3425+358T>A]
2L mapping	147102	SNV	1	T	A	46	100	35	Gene: FBgn0031228, Gene: FBgn0259818, Misc. feature: contig 2L_1_3 1..50000(1)	FBpp0291141:c.[3431+247A>T]; FBpp0303493:c.[3425+253A>T]
2L mapping	147254	SNV	1	C	T	35	97.1429	33.7353	Gene: FBgn0031228, Gene: FBgn0259818, Misc. feature: contig 2L_1_3 1..50000(1)	FBpp0303493:c.[3425+101G>A]; FBpp0291141:c.[3431+95G>A]
2L mapping	147688	SNV	1	C	T	37	100	35.2703	CDS: FBgn0259818, CDS: FBgn0259818, Exon: Exon, Gene: FBgn0031228, Gene: FBgn0259818, Misc. feature: contig 2L_1_3 1..50000(1), mRNA: FBgn0259818, mRNA: FBgn0259818	FBpp0303493:c.[3148G>A]; FBpp0291141:c.[3148G>A]	FBpp0303493:p.[Ala1050Thr]; FBpp0291141:p.[Ala1050Thr]
2L mapping	149664	SNV	1	T	C	40	100	34.7	Gene: FBgn0031228, Gene: FBgn0259818, Misc. feature: contig 2L_1_3 1..50000(1)	FBpp0291141:c.[1993-438A>G]; FBpp0303493:c.[1993-438A>G]
2L mapping	150144	Deletion	1	T	-	42	71.4286	31.7667	Gene: FBgn0031228, Gene: FBgn0259818, Misc. feature: contig 2L_1_4 1..50000(1)	FBpp0303493:c.[1993-918delA]; FBpp0291141:c.[1993-918delA]
2L mapping	150932	SNV	1	T	G	30	100	35.2	Gene: FBgn0031228, Gene: FBgn0259818, Misc. feature: contig 2L_1_4 1..50000(1)	FBpp0303493:c.[1992+183A>C]; FBpp0291141:c.[1992+183A>C]
2L mapping	151022	SNV	1	T	G	39	100	33.7436	Gene: FBgn0031228, Gene: FBgn0259818, Misc. feature: contig 2L_1_4 1..50000(1)	FBpp0291141:c.[1992+93A>C]; FBpp0303493:c.[1992+93A>C]
2L mapping	152103	SNV	1	A	G	38	100	35.2895	CDS: FBgn0259818, CDS: FBgn0259818, Exon: Exon, Gene: FBgn0031228, Gene: FBgn0259818, Misc. feature: contig 2L_1_4 1..50000(1), mRNA: FBgn0259818, mRNA: FBgn0259818	FBpp0291141:c.[1004T>C]; FBpp0303493:c.[1004T>C]	FBpp0291141:p.[Leu335Ser]; FBpp0303493:p.[Leu335Ser]
2L mapping	153593	SNV	1	T	C	44	100	34.9318	Exon: Exon, Gene: FBgn0031228, Gene: FBgn0031227, Misc. feature: contig 2L_1_4 1..50000(1), mRNA: FBgn0031227
2L mapping	153797	SNV	1	A	G	44	100	35.5455	CDS: FBgn0031227, Exon: Exon, Gene: FBgn0031228, Gene: FBgn0031227, Misc. feature: contig 2L_1_4 1..50000(1), mRNA: FBgn0031227	FBpp0077806:c.1383T>C
2L mapping	154698	SNV	1	A	C	48	100	35.1458	CDS: FBgn0031227, Exon: Exon, Gene: FBgn0031228, Gene: FBgn0031227, Misc. feature: contig 2L_1_4 1..50000(1), mRNA: FBgn0031227	FBpp0077806:c.482T>G	FBpp0077806:p.Val161Gly
2L mapping	155303	SNV	1	C	T	52	100	34.6731	Exon: Exon, Exon: Exon, Exon: Exon, Gene: FBgn0031228, Gene: FBgn0031227, Misc. feature: contig 2L_1_4 1..50000(1), mRNA: FBgn0031228, mRNA: FBgn0031228, mRNA: FBgn0031227
2L mapping	155548	Deletion	1	T	-	54	46.2963	29.76	Exon: Exon, Exon: Exon, Exon: Exon, Exon: Exon, Exon: Exon, Gene: FBgn0031228, Misc. feature: contig 2L_1_4 1..50000(1), mRNA: FBgn0031228, mRNA: FBgn0031228, mRNA: FBgn0031228, mRNA: FBgn0031228, mRNA: FBgn0031228, mRNA: FBgn0031228
2L mapping	155691	SNV	1	C	G	34	100	33.5	CDS: FBgn0031228, CDS: FBgn0031228, CDS: FBgn0031228, CDS: FBgn0031228, CDS: FBgn0031228, CDS: FBgn0031228, CDS: FBgn0031228, CDS: FBgn0031228, CDS: FBgn0031228, CDS: FBgn0031228, Exon: Exon, Exon: Exon, Exon: Exon, Exon: Exon, Exon: Exon, Exon: Exon, Exon: Exon, Gene: FBgn0031228, Misc. feature: contig 2L_1_4 1..50000(1), mRNA: FBgn0031228, mRNA: FBgn0031228, mRNA: FBgn0031228, mRNA: FBgn0031228…	FBpp0077776:c.[120C>G]; FBpp0303491:c.[120C>G]; FBpp0303492:c.[120C>G]; FBpp0291100:c.[120C>G]; FBpp0297500:c.[120C>G]; FBpp0303490:c.[27C>G]; FBpp0291101:c.[120C>G]; FBpp0077777:c.[120C>G]; FBpp0303489:c.[27C>G]; FBpp0303488:c.[120C>G]
2L mapping	155961	SNV	1	G	T	36	97.2222	36.1714	Exon: Exon, Gene: FBgn0031228, Misc. feature: contig 2L_1_4 1..50000(1), mRNA: FBgn0031228, mRNA: FBgn0031228, mRNA: FBgn0031228, mRNA: FBgn0031228, mRNA: FBgn0031228, mRNA: FBgn0031228, mRNA: FBgn0031228, mRNA: FBgn0031228, mRNA: FBgn0031228, mRNA: FBgn0031228
2L mapping	157017	SNV	1	C	G	42	100	35.7857	CDS: FBgn0031229, CDS: FBgn0031229, Exon: Exon, Gene: FBgn0031229, Misc. feature: contig 2L_1_4 1..50000(1), mRNA: FBgn0031229, mRNA: FBgn0031229	FBpp0309501:c.[520C>G]; FBpp0077778:c.[520C>G]	FBpp0309501:p.[His174Asp]; FBpp0077778:p.[His174Asp]
2L mapping	157709	SNV	1	T	A	52	100	35.9808	Misc. feature: contig 2L_1_4 1..50000(1)
2L mapping	157831	SNV	1	C	A	39	100	34.8974	Misc. feature: contig 2L_1_4 1..50000(1)
2L mapping	158488	SNV	1	T	C	52	100	33.1923	CDS: FBgn0053635, Exon: Exon, Gene: FBgn0053635, Misc. feature: contig 2L_1_4 1..50000(1), mRNA: FBgn0053635	FBpp0090982:c.116A>G	FBpp0090982:p.Asp39Gly
2L mapping	158812	SNV	1	T	A	31	96.7742	32.6333	Misc. feature: contig 2L_1_4 1..50000(1)
2L mapping	158894	SNV	1	G	A	40	97.5	35.4872	Misc. feature: contig 2L_1_4 1..50000(1)
2L mapping	159531	SNV	1	T	C	43	100	35.6977	Exon: Exon, Exon: Exon, Gene: FBgn0016977, Misc. feature: contig 2L_1_4 1..50000(1), mRNA: FBgn0016977, mRNA: FBgn0016977, mRNA: FBgn0016977, mRNA: FBgn0016977, mRNA: FBgn0016977
2L mapping	160228	SNV	1	T	C	51	100	33.1569	Exon: Exon, Gene: FBgn0016977, Misc. feature: contig 2L_1_4 1..50000(1), mRNA: FBgn0016977
2L mapping	160301	SNV	1	G	A	45	100	36.4667	Exon: Exon, Gene: FBgn0016977, Misc. feature: contig 2L_1_4 1..50000(1), mRNA: FBgn0016977
2L mapping	160338	Insertion	1	-	T	36	80.5556	35.6897	Exon: Exon, Gene: FBgn0016977, Misc. feature: contig 2L_1_4 1..50000(1), mRNA: FBgn0016977
2L mapping	160996	Deletion	1	A	-	29	62.069	34.1111	Exon: Exon, Gene: FBgn0016977, Misc. feature: contig 2L_1_4 1..50000(1), mRNA: FBgn0016977
2L mapping	161042	SNV	1	T	C	38	100	33.7895	Exon: Exon, Gene: FBgn0016977, Misc. feature: contig 2L_1_4 1..50000(1), mRNA: FBgn0016977
2L mapping	161428	SNV	1	C	T	47	97.8723	34.9783	Exon: Exon, Gene: FBgn0016977, Misc. feature: contig 2L_1_4 1..50000(1), mRNA: FBgn0016977
2L mapping	161983	SNV	1	G	C	36	100	35.9444	Exon: Exon, Gene: FBgn0016977, Misc. feature: contig 2L_1_4 1..50000(1), mRNA: FBgn0016977
2L mapping	162420	Deletion	1	A	-	48	91.6667	31	Exon: Exon, Gene: FBgn0016977, Misc. feature: contig 2L_1_4 1..50000(1), mRNA: FBgn0016977
2L mapping	163611	SNV	1	T	G	47	100	35.5532	Gene: FBgn0016977, Misc. feature: contig 2L_1_4 1..50000(1)	FBpp0077780:c.[179+610T>G]; FBpp0077781:c.[179+610T>G]
2L mapping	163880	MNV	2	TA	AC	48	93.75	34.8222	Gene: FBgn0016977, Misc. feature: contig 2L_1_4 1..50000(1)	FBpp0077780:c.[179+879_179+880delTAinsAC]; FBpp0077781:c.[179+879_179+880delTAinsAC]
2L mapping	164518	Deletion	3	AAG	-	48	87.5	35.0238	Gene: FBgn0016977, Misc. feature: contig 2L_1_4 1..50000(1)	FBpp0077781:c.[179+1517_179+1519delAAG]; FBpp0077780:c.[179+1517_179+1519delAAG]
2L mapping	164690	SNV	1	A	C	41	97.561	35.425	Gene: FBgn0016977, Misc. feature: contig 2L_1_4 1..50000(1)	FBpp0077780:c.[179+1689A>C]; FBpp0077781:c.[179+1689A>C]
2L mapping	164734	SNV	1	G	A	45	100	35.7778	Gene: FBgn0016977, Misc. feature: contig 2L_1_4 1..50000(1)	FBpp0077780:c.[179+1733G>A]; FBpp0077781:c.[179+1733G>A]
2L mapping	165141	SNV	1	C	T	38	94.7368	35.3333	Gene: FBgn0016977, Misc. feature: contig 2L_1_4 1..50000(1)	FBpp0077780:c.[179+2140C>T]; FBpp0077781:c.[179+2140C>T]
2L mapping	165228	SNV	1	A	T	51	100	34.5686	Gene: FBgn0016977, Misc. feature: contig 2L_1_4 1..50000(1)	FBpp0077781:c.[179+2227A>T]; FBpp0077780:c.[179+2227A>T]
2L mapping	165233	SNV	1	C	A	53	100	33.6792	Gene: FBgn0016977, Misc. feature: contig 2L_1_4 1..50000(1)	FBpp0077781:c.[179+2232C>A]; FBpp0077780:c.[179+2232C>A]
2L mapping	165314	SNV	1	T	C	46	100	34.4565	Gene: FBgn0016977, Misc. feature: contig 2L_1_4 1..50000(1)	FBpp0077781:c.[179+2313T>C]; FBpp0077780:c.[179+2313T>C]
2L mapping	165675	SNV	1	A	T	41	100	34.5122	Gene: FBgn0016977, Misc. feature: contig 2L_1_4 1..50000(1)	FBpp0077780:c.[179+2674A>T]; FBpp0077781:c.[179+2674A>T]
2L mapping	165985	SNV	1	C	T	30	100	34.6	Gene: FBgn0016977, Misc. feature: contig 2L_1_4 1..50000(1)	FBpp0077781:c.[179+2984C>T]; FBpp0077780:c.[179+2984C>T]
2L mapping	166027	SNV	1	G	A	34	97.0588	35.2727	Gene: FBgn0016977, Misc. feature: contig 2L_1_4 1..50000(1)	FBpp0077781:c.[179+3026G>A]; FBpp0077780:c.[179+3026G>A]
2L mapping	167152	SNV	1	A	G	41	100	34.6585	Gene: FBgn0016977, Misc. feature: contig 2L_1_4 1..50000(1)	FBpp0077780:c.[179+4151A>G]; FBpp0077781:c.[179+4151A>G]
2L mapping	167271	SNV	1	T	G	45	100	33.0667	Gene: FBgn0016977, Misc. feature: contig 2L_1_4 1..50000(1)	FBpp0077781:c.[179+4270T>G]; FBpp0077780:c.[179+4270T>G]
2L mapping	167686	Insertion	4	-	AATC	23	47.8261	34.6591	Gene: FBgn0016977, Misc. feature: contig 2L_1_4 1..50000(1)	FBpp0077780:c.[179+4684_179+4685insAATC]; FBpp0077781:c.[179+4684_179+4685insAATC]
2L mapping	168306	SNV	1	C	T	40	100	34.05	Gene: FBgn0016977, Misc. feature: contig 2L_1_4 1..50000(1)	FBpp0077781:c.[179+5305C>T]; FBpp0077780:c.[179+5305C>T]
2L mapping	168605	SNV	1	C	G	38	100	33.5789	Gene: FBgn0016977, Misc. feature: contig 2L_1_4 1..50000(1)	FBpp0077780:c.[179+5604C>G]; FBpp0077781:c.[179+5604C>G]
2L mapping	168867	SNV	1	A	G	39	100	33.2308	Gene: FBgn0016977, Misc. feature: contig 2L_1_4 1..50000(1)	FBpp0077781:c.[179+5866A>G]; FBpp0077780:c.[179+5866A>G]
2L mapping	169089	SNV	1	T	C	48	100	34.8125	Gene: FBgn0016977, Misc. feature: contig 2L_1_4 1..50000(1)	FBpp0077780:c.[179+6088T>C]; FBpp0077781:c.[179+6088T>C]
2L mapping	169095	SNV	1	A	T	51	100	35.8039	Gene: FBgn0016977, Misc. feature: contig 2L_1_4 1..50000(1)	FBpp0077781:c.[179+6094A>T]; FBpp0077780:c.[179+6094A>T]
2L mapping	169163	SNV	1	A	T	43	100	35.2558	Gene: FBgn0016977, Misc. feature: contig 2L_1_4 1..50000(1)	FBpp0077780:c.[179+6162A>T]; FBpp0077781:c.[179+6162A>T]
2L mapping	169468	SNV	1	G	A	44	97.7273	35.814	Gene: FBgn0016977, Misc. feature: contig 2L_1_4 1..50000(1)	FBpp0077781:c.[179+6467G>A]; FBpp0077780:c.[179+6467G>A]
2L mapping	169824	Deletion	1	T	-	40	100	34.1	Gene: FBgn0016977, Misc. feature: contig 2L_1_4 1..50000(1)	FBpp0077781:c.[179+6823delT]; FBpp0077780:c.[179+6823delT]
2L mapping	170020	SNV	1	A	G	53	100	35.8113	Gene: FBgn0016977, Misc. feature: contig 2L_1_4 1..50000(1)	FBpp0077780:c.[179+7019A>G]; FBpp0077781:c.[179+7019A>G]
2L mapping	170176	SNV	1	G	T	56	100	34.2857	Gene: FBgn0016977, Misc. feature: contig 2L_1_4 1..50000(1)	FBpp0077781:c.[179+7175G>T]; FBpp0077780:c.[179+7175G>T]
2L mapping	170879	Deletion	1	T	-	36	100	33.8056	Gene: FBgn0016977, Misc. feature: contig 2L_1_4 1..50000(1)	FBpp0077781:c.[179+7878delT]; FBpp0077780:c.[179+7878delT]
2L mapping	170881	MNV	3	AAG	TTT	36	100	36.0833	Gene: FBgn0016977, Misc. feature: contig 2L_1_4 1..50000(1)	FBpp0077781:c.[179+7880_179+7882delAAGinsTTT]; FBpp0077780:c.[179+7880_179+7882delAAGinsTTT]
2L mapping	171047	SNV	1	A	T	46	95.6522	35.3409	Gene: FBgn0016977, Misc. feature: contig 2L_1_4 1..50000(1)	FBpp0077781:c.[179+8046A>T]; FBpp0077780:c.[179+8046A>T]
2L mapping	171314	SNV	1	T	A	57	100	35.6842	Gene: FBgn0016977, Misc. feature: contig 2L_1_4 1..50000(1)	FBpp0077780:c.[179+8313T>A]; FBpp0077781:c.[179+8313T>A]
2L mapping	171345	SNV	1	C	G	51	100	33.3137	Gene: FBgn0016977, Misc. feature: contig 2L_1_4 1..50000(1)	FBpp0077780:c.[179+8344C>G]; FBpp0077781:c.[179+8344C>G]
2L mapping	171348	SNV	1	C	A	51	100	35.3137	Gene: FBgn0016977, Misc. feature: contig 2L_1_4 1..50000(1)	FBpp0077781:c.[179+8347C>A]; FBpp0077780:c.[179+8347C>A]
2L mapping	171550	SNV	1	A	T	45	97.7778	34.7273	Gene: FBgn0016977, Misc. feature: contig 2L_1_4 1..50000(1)	FBpp0077780:c.[179+8549A>T]; FBpp0077781:c.[179+8549A>T]
2L mapping	171719	SNV	1	T	C	31	100	35.1613	Gene: FBgn0016977, Misc. feature: contig 2L_1_4 1..50000(1)	FBpp0077781:c.[179+8718T>C]; FBpp0077780:c.[179+8718T>C]
2L mapping	171771	Insertion	2	-	AA	27	66.6667	36.8889	Gene: FBgn0016977, Misc. feature: contig 2L_1_4 1..50000(1)	FBpp0077780:c.[179+8769_179+8770insAA]; FBpp0077781:c.[179+8769_179+8770insAA]
2L mapping	172063	SNV	1	C	T	39	100	36.0769	Gene: FBgn0016977, Misc. feature: contig 2L_1_4 1..50000(1)	FBpp0077781:c.[179+9062C>T]; FBpp0077780:c.[179+9062C>T]
2L mapping	172088	SNV	1	A	G	26	100	32.8462	Gene: FBgn0016977, Misc. feature: contig 2L_1_4 1..50000(1)	FBpp0077781:c.[179+9087A>G]; FBpp0077780:c.[179+9087A>G]
2L mapping	172137	Insertion	2	-	GC	18	94.4444	33.4118	Gene: FBgn0016977, Misc. feature: contig 2L_1_4 1..50000(1)	FBpp0077780:c.[179+9135_179+9136insGC]; FBpp0077781:c.[179+9135_179+9136insGC]
2L mapping	172139	SNV	1	T	A	18	100	32.3889	Gene: FBgn0016977, Misc. feature: contig 2L_1_4 1..50000(1)	FBpp0077780:c.[179+9138T>A]; FBpp0077781:c.[179+9138T>A]
2L mapping	172141	SNV	1	T	A	18	100	32.5	Gene: FBgn0016977, Misc. feature: contig 2L_1_4 1..50000(1)	FBpp0077780:c.[179+9140T>A]; FBpp0077781:c.[179+9140T>A]
2L mapping	172166	SNV	1	C	A	25	100	33.12	Gene: FBgn0016977, Misc. feature: contig 2L_1_4 1..50000(1)	FBpp0077781:c.[179+9165C>A]; FBpp0077780:c.[179+9165C>A]
2L mapping	172459	SNV	1	T	G	38	100	31.4474	Gene: FBgn0016977, Misc. feature: contig 2L_1_4 1..50000(1)	FBpp0077780:c.[179+9458T>G]; FBpp0077781:c.[179+9458T>G]
2L mapping	172514	SNV	1	T	A	31	100	32.6129	Gene: FBgn0016977, Misc. feature: contig 2L_1_4 1..50000(1)	FBpp0077781:c.[179+9513T>A]; FBpp0077780:c.[179+9513T>A]
2L mapping	173244	Insertion	2	-	AG	46	78.2609	35.1389	Gene: FBgn0016977, Misc. feature: contig 2L_1_4 1..50000(1)	FBpp0077780:c.[179+10242_179+10243insAG]; FBpp0077781:c.[179+10242_179+10243insAG]
2L mapping	173627	SNV	1	T	G	47	100	35.0851	Gene: FBgn0016977, Misc. feature: contig 2L_1_4 1..50000(1)	FBpp0077780:c.[180-10134T>G]; FBpp0077781:c.[180-10134T>G]
2L mapping	174630	Insertion	1	-	T	52	88.4615	35.7609	Gene: FBgn0016977, Misc. feature: contig 2L_1_4 1..50000(1)	FBpp0077781:c.[180-9132_180-9131insT]; FBpp0077780:c.[180-9132_180-9131insT]
2L mapping	175343	SNV	1	C	A	43	100	35.7209	Gene: FBgn0016977, Misc. feature: contig 2L_1_4 1..50000(1)	FBpp0077780:c.[180-8418C>A]; FBpp0077781:c.[180-8418C>A]
2L mapping	176140	Deletion	5	GCTAT	-	34	88.2353	33	Gene: FBgn0016977, Misc. feature: contig 2L_1_4 1..50000(1)	FBpp0303502:c.[14+693_14+697delGCTAT]; FBpp0297434:c.[14+693_14+697delGCTAT]; FBpp0077780:c.[180-7621_180-7617delGCTAT]; FBpp0304613:c.[14+693_14+697delGCTAT]; FBpp0077781:c.[180-7621_180-7617delGCTAT]
2L mapping	176384	SNV	1	T	A	55	98.1818	34.4444	Gene: FBgn0016977, Misc. feature: contig 2L_1_4 1..50000(1)	FBpp0077780:c.[180-7377T>A]; FBpp0077781:c.[180-7377T>A]; FBpp0303502:c.[14+937T>A]; FBpp0297434:c.[14+937T>A]; FBpp0304613:c.[14+937T>A]
2L mapping	179473	SNV	1	G	A	37	100	35.2703	Gene: FBgn0016977, Misc. feature: contig 2L_1_4 1..50000(1)	FBpp0077781:c.[180-4288G>A]; FBpp0077780:c.[180-4288G>A]; FBpp0303502:c.[14+4026G>A]; FBpp0297434:c.[14+4026G>A]; FBpp0304613:c.[14+4026G>A]
2L mapping	179837	SNV	1	A	G	41	90.2439	33.9459	Gene: FBgn0016977, Misc. feature: contig 2L_1_4 1..50000(1)	FBpp0297434:c.[15-3924A>G]; FBpp0077780:c.[180-3924A>G]; FBpp0077781:c.[180-3924A>G]; FBpp0303502:c.[15-3924A>G]; FBpp0304613:c.[15-3924A>G]
2L mapping	182065	SNV	1	G	A	41	100	35.3171	Gene: FBgn0016977, Misc. feature: contig 2L_1_4 1..50000(1)	FBpp0077781:c.[180-1696G>A]; FBpp0303502:c.[15-1696G>A]; FBpp0297434:c.[15-1696G>A]; FBpp0077780:c.[180-1696G>A]; FBpp0304613:c.[15-1696G>A]
2L mapping	182093	Deletion	1	A	-	34	76.4706	30.5385	Gene: FBgn0016977, Misc. feature: contig 2L_1_4 1..50000(1)	FBpp0077781:c.[180-1668delA]; FBpp0077780:c.[180-1668delA]; FBpp0303502:c.[15-1668delA]; FBpp0297434:c.[15-1668delA]; FBpp0304613:c.[15-1668delA]
2L mapping	182145	SNV	1	A	C	36	100	33.1389	Gene: FBgn0016977, Misc. feature: contig 2L_1_4 1..50000(1)	FBpp0304613:c.[15-1616A>C]; FBpp0297434:c.[15-1616A>C]; FBpp0077781:c.[180-1616A>C]; FBpp0077780:c.[180-1616A>C]; FBpp0303502:c.[15-1616A>C]
2L mapping	182298	SNV	1	A	C	52	98.0769	35.4902	Gene: FBgn0016977, Misc. feature: contig 2L_1_4 1..50000(1)	FBpp0303502:c.[15-1463A>C]; FBpp0297434:c.[15-1463A>C]; FBpp0077780:c.[180-1463A>C]; FBpp0077781:c.[180-1463A>C]; FBpp0304613:c.[15-1463A>C]
2L mapping	182511	SNV	1	A	G	33	100	35.6364	Gene: FBgn0016977, Misc. feature: contig 2L_1_4 1..50000(1)	FBpp0077781:c.[180-1250A>G]; FBpp0297434:c.[15-1250A>G]; FBpp0304613:c.[15-1250A>G]; FBpp0077780:c.[180-1250A>G]; FBpp0303502:c.[15-1250A>G]
2L mapping	182543	Deletion	1	A	-	35	100	35.7143	Gene: FBgn0016977, Misc. feature: contig 2L_1_4 1..50000(1)	FBpp0077781:c.[180-1218delA]; FBpp0304613:c.[15-1218delA]; FBpp0077780:c.[180-1218delA]; FBpp0303502:c.[15-1218delA]; FBpp0297434:c.[15-1218delA]
2L mapping	182585	SNV	1	C	G	47	100	32.766	Gene: FBgn0016977, Misc. feature: contig 2L_1_4 1..50000(1)	FBpp0077781:c.[180-1176C>G]; FBpp0297434:c.[15-1176C>G]; FBpp0304613:c.[15-1176C>G]; FBpp0303502:c.[15-1176C>G]; FBpp0077780:c.[180-1176C>G]
2L mapping	182725	SNV	1	A	G	41	100	34.8049	Gene: FBgn0016977, Misc. feature: contig 2L_1_4 1..50000(1)	FBpp0304613:c.[15-1036A>G]; FBpp0303502:c.[15-1036A>G]; FBpp0077781:c.[180-1036A>G]; FBpp0077780:c.[180-1036A>G]; FBpp0297434:c.[15-1036A>G]
2L mapping	183483	Deletion	1	A	-	41	53.6585	30.8636	Gene: FBgn0016977, Misc. feature: contig 2L_1_4 1..50000(1)	FBpp0303502:c.[15-278delA]; FBpp0297434:c.[15-278delA]; FBpp0304614:c.[8+64delA]; FBpp0304613:c.[15-278delA]; FBpp0077781:c.[180-278delA]; FBpp0303503:c.[30-278delA]; FBpp0077780:c.[180-278delA]; FBpp0077782:c.[8+64delA]
2L mapping	183672	SNV	1	G	A	43	100	34.5581	Gene: FBgn0016977, Misc. feature: contig 2L_1_4 1..50000(1)	FBpp0303502:c.[15-89G>A]; FBpp0077780:c.[180-89G>A]; FBpp0304613:c.[15-89G>A]; FBpp0077782:c.[9-89G>A]; FBpp0304614:c.[9-89G>A]; FBpp0303503:c.[30-89G>A]; FBpp0077781:c.[180-89G>A]; FBpp0297434:c.[15-89G>A]
2L mapping	186136	SNV	1	T	G	36	100	35.25	Gene: FBgn0016977, Misc. feature: contig 2L_1_4 1..50000(1)	FBpp0077782:c.[2302+13T>G]; FBpp0304613:c.[2308+13T>G]; FBpp0303503:c.[2323+13T>G]; FBpp0077780:c.[2473+13T>G]; FBpp0297434:c.[2308+13T>G]; FBpp0304614:c.[2302+13T>G]; FBpp0303502:c.[2308+13T>G]; FBpp0077781:c.[2473+13T>G]
2L mapping	187311	SNV	1	G	C	42	100	34.4524	Gene: FBgn0016977, Misc. feature: contig 2L_1_4 1..50000(1)	FBpp0303502:c.[3133-171G>C]; FBpp0304613:c.[3079-171G>C]; FBpp0077782:c.[3127-171G>C]; FBpp0077781:c.[3298-171G>C]; FBpp0297434:c.[3133-171G>C]; FBpp0304614:c.[3073-171G>C]; FBpp0077780:c.[3298-171G>C]; FBpp0303503:c.[3148-171G>C]
2L mapping	187382	Deletion	2	TT	-	43	69.7674	33.2333	Gene: FBgn0016977, Misc. feature: contig 2L_1_4 1..50000(1)	FBpp0077782:c.[3127-100_3127-99delTT]; FBpp0077781:c.[3298-100_3298-99delTT]; FBpp0297434:c.[3133-100_3133-99delTT]; FBpp0304614:c.[3073-100_3073-99delTT]; FBpp0303502:c.[3133-100_3133-99delTT]; FBpp0077780:c.[3298-100_3298-99delTT]; FBpp0304613:c.[3079-100_3079-99delTT]; FBpp0303503:c.[3148-100_3148-99delTT]
2L mapping	188626	SNV	1	C	T	36	100	35.2222	CDS: FBgn0016977, CDS: FBgn0016977, CDS: FBgn0016977, CDS: FBgn0016977, CDS: FBgn0016977, CDS: FBgn0016977, CDS: FBgn0016977, CDS: FBgn0016977, Exon: Exon, Gene: FBgn0016977, Misc. feature: contig 2L_1_4 1..50000(1), mRNA: FBgn0016977, mRNA: FBgn0016977, mRNA: FBgn0016977, mRNA: FBgn0016977, mRNA: FBgn0016977, mRNA: FBgn0016977, mRNA: FBgn0016977, mRNA: FBgn0016977	FBpp0297434:c.[4277C>T]; FBpp0077780:c.[4442C>T]; FBpp0077782:c.[4271C>T]; FBpp0077781:c.[4442C>T]; FBpp0303502:c.[4277C>T]; FBpp0304614:c.[4217C>T]; FBpp0303503:c.[4292C>T]; FBpp0304613:c.[4223C>T]	FBpp0297434:p.[Ala1426Val]; FBpp0077780:p.[Ala1481Val]; FBpp0077782:p.[Ala1424Val]; FBpp0077781:p.[Ala1481Val]; FBpp0303502:p.[Ala1426Val]; FBpp0304614:p.[Ala1406Val]; FBpp0303503:p.[Ala1431Val]; FBpp0304613:p.[Ala1408Val]
2L mapping	189403	SNV	1	C	G	33	100	34.5455	CDS: FBgn0016977, CDS: FBgn0016977, CDS: FBgn0016977, CDS: FBgn0016977, CDS: FBgn0016977, CDS: FBgn0016977, CDS: FBgn0016977, CDS: FBgn0016977, Exon: Exon, Gene: FBgn0016977, Misc. feature: contig 2L_1_4 1..50000(1), mRNA: FBgn0016977, mRNA: FBgn0016977, mRNA: FBgn0016977, mRNA: FBgn0016977, mRNA: FBgn0016977, mRNA: FBgn0016977, mRNA: FBgn0016977, mRNA: FBgn0016977	FBpp0303503:c.[5069C>G]; FBpp0077780:c.[5219C>G]; FBpp0304614:c.[4994C>G]; FBpp0077782:c.[5048C>G]; FBpp0077781:c.[5219C>G]; FBpp0297434:c.[5054C>G]; FBpp0303502:c.[5054C>G]; FBpp0304613:c.[5000C>G]	FBpp0303503:p.[Ser1690Cys]; FBpp0077780:p.[Ser1740Cys]; FBpp0304614:p.[Ser1665Cys]; FBpp0077782:p.[Ser1683Cys]; FBpp0077781:p.[Ser1740Cys]; FBpp0297434:p.[Ser1685Cys]; FBpp0303502:p.[Ser1685Cys]; FBpp0304613:p.[Ser1667Cys]
2L mapping	190298	SNV	1	G	A	34	97.0588	33.7576	CDS: FBgn0016977, CDS: FBgn0016977, CDS: FBgn0016977, CDS: FBgn0016977, CDS: FBgn0016977, CDS: FBgn0016977, CDS: FBgn0016977, CDS: FBgn0016977, Exon: Exon, Gene: FBgn0016977, Misc. feature: contig 2L_1_4 1..50000(1), mRNA: FBgn0016977, mRNA: FBgn0016977, mRNA: FBgn0016977, mRNA: FBgn0016977, mRNA: FBgn0016977, mRNA: FBgn0016977, mRNA: FBgn0016977, mRNA: FBgn0016977	FBpp0297434:c.[5949G>A]; FBpp0077782:c.[5943G>A]; FBpp0077780:c.[6114G>A]; FBpp0303502:c.[5949G>A]; FBpp0303503:c.[5964G>A]; FBpp0077781:c.[6114G>A]; FBpp0304613:c.[5895G>A]; FBpp0304614:c.[5889G>A]
2L mapping	190466	SNV	1	T	C	38	100	32.6579	CDS: FBgn0016977, CDS: FBgn0016977, CDS: FBgn0016977, CDS: FBgn0016977, CDS: FBgn0016977, CDS: FBgn0016977, CDS: FBgn0016977, CDS: FBgn0016977, Exon: Exon, Gene: FBgn0016977, Misc. feature: contig 2L_1_4 1..50000(1), mRNA: FBgn0016977, mRNA: FBgn0016977, mRNA: FBgn0016977, mRNA: FBgn0016977, mRNA: FBgn0016977, mRNA: FBgn0016977, mRNA: FBgn0016977, mRNA: FBgn0016977	FBpp0077782:c.[6111T>C]; FBpp0304614:c.[6057T>C]; FBpp0303502:c.[6117T>C]; FBpp0304613:c.[6063T>C]; FBpp0303503:c.[6132T>C]; FBpp0297434:c.[6117T>C]; FBpp0077781:c.[6282T>C]; FBpp0077780:c.[6282T>C]
2L mapping	192412	SNV	1	A	G	26	100	33.6538	CDS: FBgn0016977, CDS: FBgn0016977, CDS: FBgn0016977, CDS: FBgn0016977, CDS: FBgn0016977, CDS: FBgn0016977, CDS: FBgn0016977, CDS: FBgn0016977, Exon: Exon, Gene: FBgn0016977, Misc. feature: contig 2L_1_4 1..50000(1), mRNA: FBgn0016977, mRNA: FBgn0016977, mRNA: FBgn0016977, mRNA: FBgn0016977, mRNA: FBgn0016977, mRNA: FBgn0016977, mRNA: FBgn0016977, mRNA: FBgn0016977	FBpp0304613:c.[8009A>G]; FBpp0304614:c.[8003A>G]; FBpp0077780:c.[8228A>G]; FBpp0077781:c.[8228A>G]; FBpp0303502:c.[8063A>G]; FBpp0297434:c.[8063A>G]; FBpp0303503:c.[8078A>G]; FBpp0077782:c.[8057A>G]	FBpp0304613:p.[Lys2670Arg]; FBpp0304614:p.[Lys2668Arg]; FBpp0077780:p.[Lys2743Arg]; FBpp0077781:p.[Lys2743Arg]; FBpp0303502:p.[Lys2688Arg]; FBpp0297434:p.[Lys2688Arg]; FBpp0303503:p.[Lys2693Arg]; FBpp0077782:p.[Lys2686Arg]
2L mapping	192484	SNV	1	C	T	48	100	34.8333	CDS: FBgn0016977, CDS: FBgn0016977, CDS: FBgn0016977, CDS: FBgn0016977, CDS: FBgn0016977, CDS: FBgn0016977, CDS: FBgn0016977, CDS: FBgn0016977, Exon: Exon, Gene: FBgn0016977, Misc. feature: contig 2L_1_4 1..50000(1), mRNA: FBgn0016977, mRNA: FBgn0016977, mRNA: FBgn0016977, mRNA: FBgn0016977, mRNA: FBgn0016977, mRNA: FBgn0016977, mRNA: FBgn0016977, mRNA: FBgn0016977	FBpp0304613:c.[8081C>T]; FBpp0077782:c.[8129C>T]; FBpp0077781:c.[8300C>T]; FBpp0304614:c.[8075C>T]; FBpp0297434:c.[8135C>T]; FBpp0303503:c.[8150C>T]; FBpp0077780:c.[8300C>T]; FBpp0303502:c.[8135C>T]	FBpp0304613:p.[Thr2694Ile]; FBpp0077782:p.[Thr2710Ile]; FBpp0077781:p.[Thr2767Ile]; FBpp0304614:p.[Thr2692Ile]; FBpp0297434:p.[Thr2712Ile]; FBpp0303503:p.[Thr2717Ile]; FBpp0077780:p.[Thr2767Ile]; FBpp0303502:p.[Thr2712Ile]
2L mapping	192594	SNV	1	A	G	41	100	35.1951	CDS: FBgn0016977, CDS: FBgn0016977, CDS: FBgn0016977, CDS: FBgn0016977, CDS: FBgn0016977, CDS: FBgn0016977, CDS: FBgn0016977, CDS: FBgn0016977, Exon: Exon, Gene: FBgn0016977, Misc. feature: contig 2L_1_4 1..50000(1), mRNA: FBgn0016977, mRNA: FBgn0016977, mRNA: FBgn0016977, mRNA: FBgn0016977, mRNA: FBgn0016977, mRNA: FBgn0016977, mRNA: FBgn0016977, mRNA: FBgn0016977	FBpp0304614:c.[8185A>G]; FBpp0077781:c.[8410A>G]; FBpp0303503:c.[8260A>G]; FBpp0303502:c.[8245A>G]; FBpp0297434:c.[8245A>G]; FBpp0077780:c.[8410A>G]; FBpp0077782:c.[8239A>G]; FBpp0304613:c.[8191A>G]	FBpp0304614:p.[Ser2729Gly]; FBpp0077781:p.[Ser2804Gly]; FBpp0303503:p.[Ser2754Gly]; FBpp0303502:p.[Ser2749Gly]; FBpp0297434:p.[Ser2749Gly]; FBpp0077780:p.[Ser2804Gly]; FBpp0077782:p.[Ser2747Gly]; FBpp0304613:p.[Ser2731Gly]
2L mapping	194601	SNV	1	C	T	30	100	32.5667	CDS: FBgn0016977, CDS: FBgn0016977, CDS: FBgn0016977, CDS: FBgn0016977, CDS: FBgn0016977, CDS: FBgn0016977, CDS: FBgn0016977, CDS: FBgn0016977, Exon: Exon, Gene: FBgn0016977, Misc. feature: contig 2L_1_4 1..50000(1), mRNA: FBgn0016977, mRNA: FBgn0016977, mRNA: FBgn0016977, mRNA: FBgn0016977, mRNA: FBgn0016977, mRNA: FBgn0016977, mRNA: FBgn0016977, mRNA: FBgn0016977	FBpp0297434:c.[10252C>T]; FBpp0077780:c.[10417C>T]; FBpp0304614:c.[10192C>T]; FBpp0303502:c.[10252C>T]; FBpp0304613:c.[10198C>T]; FBpp0303503:c.[10267C>T]; FBpp0077782:c.[10246C>T]; FBpp0077781:c.[10417C>T]	FBpp0297434:p.[Pro3418Ser]; FBpp0077780:p.[Pro3473Ser]; FBpp0304614:p.[Pro3398Ser]; FBpp0303502:p.[Pro3418Ser]; FBpp0304613:p.[Pro3400Ser]; FBpp0303503:p.[Pro3423Ser]; FBpp0077782:p.[Pro3416Ser]; FBpp0077781:p.[Pro3473Ser]
2L mapping	194865	SNV	1	G	A	37	100	36.0541	CDS: FBgn0016977, CDS: FBgn0016977, CDS: FBgn0016977, CDS: FBgn0016977, CDS: FBgn0016977, CDS: FBgn0016977, CDS: FBgn0016977, CDS: FBgn0016977, Exon: Exon, Gene: FBgn0016977, Misc. feature: contig 2L_1_4 1..50000(1), mRNA: FBgn0016977, mRNA: FBgn0016977, mRNA: FBgn0016977, mRNA: FBgn0016977, mRNA: FBgn0016977, mRNA: FBgn0016977, mRNA: FBgn0016977, mRNA: FBgn0016977	FBpp0303502:c.[10516G>A]; FBpp0303503:c.[10531G>A]; FBpp0077780:c.[10681G>A]; FBpp0304613:c.[10462G>A]; FBpp0297434:c.[10516G>A]; FBpp0077782:c.[10510G>A]; FBpp0077781:c.[10681G>A]; FBpp0304614:c.[10456G>A]	FBpp0303502:p.[Ala3506Thr]; FBpp0303503:p.[Ala3511Thr]; FBpp0077780:p.[Ala3561Thr]; FBpp0304613:p.[Ala3488Thr]; FBpp0297434:p.[Ala3506Thr]; FBpp0077782:p.[Ala3504Thr]; FBpp0077781:p.[Ala3561Thr]; FBpp0304614:p.[Ala3486Thr]
2L mapping	195338	SNV	1	T	C	31	100	35.3871	CDS: FBgn0016977, CDS: FBgn0016977, CDS: FBgn0016977, CDS: FBgn0016977, CDS: FBgn0016977, CDS: FBgn0016977, CDS: FBgn0016977, CDS: FBgn0016977, Exon: Exon, Gene: FBgn0016977, Misc. feature: contig 2L_1_4 1..50000(1), mRNA: FBgn0016977, mRNA: FBgn0016977, mRNA: FBgn0016977, mRNA: FBgn0016977, mRNA: FBgn0016977, mRNA: FBgn0016977, mRNA: FBgn0016977, mRNA: FBgn0016977	FBpp0077782:c.[10983T>C]; FBpp0077781:c.[11154T>C]; FBpp0297434:c.[10989T>C]; FBpp0304614:c.[10929T>C]; FBpp0303502:c.[10989T>C]; FBpp0077780:c.[11154T>C]; FBpp0303503:c.[11004T>C]; FBpp0304613:c.[10935T>C]
2L mapping	196086	Deletion	6	CAGCAA	-	34	64.7059	33.3182	CDS: FBgn0016977, CDS: FBgn0016977, CDS: FBgn0016977, CDS: FBgn0016977, CDS: FBgn0016977, CDS: FBgn0016977, CDS: FBgn0016977, CDS: FBgn0016977, Exon: Exon, Gene: FBgn0016977, Misc. feature: contig 2L_1_4 1..50000(1), mRNA: FBgn0016977, mRNA: FBgn0016977, mRNA: FBgn0016977, mRNA: FBgn0016977, mRNA: FBgn0016977, mRNA: FBgn0016977, mRNA: FBgn0016977, mRNA: FBgn0016977	FBpp0077782:c.[11731_11736delCAGCAA]; FBpp0304613:c.[11683_11688delCAGCAA]; FBpp0297434:c.[11737_11742delCAGCAA]; FBpp0077780:c.[11902_11907delCAGCAA]; FBpp0304614:c.[11677_11682delCAGCAA]; FBpp0303503:c.[11752_11757delCAGCAA]; FBpp0077781:c.[11902_11907delCAGCAA]; FBpp0303502:c.[11737_11742delCAGCAA]	FBpp0077782:p.[Gln3913_Gln3914del]; FBpp0304613:p.[Gln3897_Gln3898del]; FBpp0297434:p.[Gln3915_Gln3916del]; FBpp0077780:p.[Gln3970_Gln3971del]; FBpp0304614:p.[Gln3895_Gln3896del]; FBpp0303503:p.[Gln3920_Gln3921del]; FBpp0077781:p.[Gln3970_Gln3971del]; FBpp0303502:p.[Gln3915_Gln3916del]
2L mapping	198822	SNV	1	A	C	45	95.5556	34.7442	CDS: FBgn0016977, CDS: FBgn0016977, CDS: FBgn0016977, CDS: FBgn0016977, CDS: FBgn0016977, CDS: FBgn0016977, CDS: FBgn0016977, CDS: FBgn0016977, Exon: Exon, Gene: FBgn0016977, Misc. feature: contig 2L_1_4 1..50000(1), mRNA: FBgn0016977, mRNA: FBgn0016977, mRNA: FBgn0016977, mRNA: FBgn0016977, mRNA: FBgn0016977, mRNA: FBgn0016977, mRNA: FBgn0016977, mRNA: FBgn0016977	FBpp0304613:c.[14419A>C]; FBpp0303503:c.[14488A>C]; FBpp0077782:c.[14467A>C]; FBpp0304614:c.[14413A>C]; FBpp0303502:c.[14473A>C]; FBpp0297434:c.[14473A>C]; FBpp0077781:c.[14638A>C]; FBpp0077780:c.[14638A>C]	FBpp0304613:p.[Thr4807Pro]; FBpp0303503:p.[Thr4830Pro]; FBpp0077782:p.[Thr4823Pro]; FBpp0304614:p.[Thr4805Pro]; FBpp0303502:p.[Thr4825Pro]; FBpp0297434:p.[Thr4825Pro]; FBpp0077781:p.[Thr4880Pro]; FBpp0077780:p.[Thr4880Pro]
2L mapping	199059	SNV	1	C	G	30	100	34.6	CDS: FBgn0016977, CDS: FBgn0016977, CDS: FBgn0016977, CDS: FBgn0016977, CDS: FBgn0016977, CDS: FBgn0016977, CDS: FBgn0016977, CDS: FBgn0016977, Exon: Exon, Gene: FBgn0016977, Misc. feature: contig 2L_1_4 1..50000(1), mRNA: FBgn0016977, mRNA: FBgn0016977, mRNA: FBgn0016977, mRNA: FBgn0016977, mRNA: FBgn0016977, mRNA: FBgn0016977, mRNA: FBgn0016977, mRNA: FBgn0016977	FBpp0077780:c.[14875C>G]; FBpp0077781:c.[14875C>G]; FBpp0304613:c.[14656C>G]; FBpp0304614:c.[14650C>G]; FBpp0077782:c.[14704C>G]; FBpp0297434:c.[14710C>G]; FBpp0303503:c.[14725C>G]; FBpp0303502:c.[14710C>G]	FBpp0077780:p.[Gln4959Glu]; FBpp0077781:p.[Gln4959Glu]; FBpp0304613:p.[Gln4886Glu]; FBpp0304614:p.[Gln4884Glu]; FBpp0077782:p.[Gln4902Glu]; FBpp0297434:p.[Gln4904Glu]; FBpp0303503:p.[Gln4909Glu]; FBpp0303502:p.[Gln4904Glu]
2L mapping	200342	SNV	1	T	C	38	100	34.5526	Gene: FBgn0016977, Misc. feature: contig 2L_1_5 1..50000(1)	FBpp0297434:c.[15610+27T>C]; FBpp0077782:c.[15523+27T>C]; FBpp0304614:c.[15469+27T>C]; FBpp0303502:c.[15610+27T>C]; FBpp0077781:c.[15775+27T>C]; FBpp0304613:c.[15556+27T>C]; FBpp0303503:c.[15625+27T>C]; FBpp0077780:c.[15694+27T>C]
2L mapping	200401	SNV	1	C	T	51	100	33.7647	CDS: FBgn0016977, CDS: FBgn0016977, CDS: FBgn0016977, CDS: FBgn0016977, CDS: FBgn0016977, CDS: FBgn0016977, CDS: FBgn0016977, CDS: FBgn0016977, Exon: Exon, Gene: FBgn0016977, Misc. feature: contig 2L_1_5 1..50000(1), mRNA: FBgn0016977, mRNA: FBgn0016977, mRNA: FBgn0016977, mRNA: FBgn0016977, mRNA: FBgn0016977, mRNA: FBgn0016977, mRNA: FBgn0016977, mRNA: FBgn0016977	FBpp0303503:c.[15651C>T]; FBpp0077780:c.[15720C>T]; FBpp0303502:c.[15636C>T]; FBpp0297434:c.[15636C>T]; FBpp0304613:c.[15582C>T]; FBpp0077782:c.[15549C>T]; FBpp0304614:c.[15495C>T]; FBpp0077781:c.[15801C>T]
2L mapping	200947	SNV	1	T	C	47	97.8723	35.6087	CDS: FBgn0016977, CDS: FBgn0016977, CDS: FBgn0016977, CDS: FBgn0016977, CDS: FBgn0016977, CDS: FBgn0016977, CDS: FBgn0016977, CDS: FBgn0016977, Exon: Exon, Gene: FBgn0016977, Misc. feature: contig 2L_1_5 1..50000(1), mRNA: FBgn0016977, mRNA: FBgn0016977, mRNA: FBgn0016977, mRNA: FBgn0016977, mRNA: FBgn0016977, mRNA: FBgn0016977, mRNA: FBgn0016977, mRNA: FBgn0016977	FBpp0077782:c.[16029T>C]; FBpp0303503:c.[16131T>C]; FBpp0304613:c.[16062T>C]; FBpp0077781:c.[16281T>C]; FBpp0297434:c.[16116T>C]; FBpp0304614:c.[15975T>C]; FBpp0303502:c.[16116T>C]; FBpp0077780:c.[16200T>C]
2L mapping	202855	Deletion	2	AA	-	54	74.0741	32.375	Exon: Exon, Exon: Exon, Gene: FBgn0016977, Misc. feature: contig 2L_1_5 1..50000(1), mRNA: FBgn0016977, mRNA: FBgn0016977, mRNA: FBgn0016977, mRNA: FBgn0016977
2L mapping	202987	MNV	2	CT	TA	53	94.3396	34.59	Exon: Exon, Exon: Exon, Gene: FBgn0016977, Misc. feature: contig 2L_1_5 1..50000(1), mRNA: FBgn0016977, mRNA: FBgn0016977, mRNA: FBgn0016977, mRNA: FBgn0016977
2L mapping	203030	SNV	1	G	A	55	100	35.7636	Exon: Exon, Exon: Exon, Gene: FBgn0016977, Misc. feature: contig 2L_1_5 1..50000(1), mRNA: FBgn0016977, mRNA: FBgn0016977, mRNA: FBgn0016977, mRNA: FBgn0016977
2L mapping	203925	SNV	1	G	A	51	100	35.9412	Gene: FBgn0031231, Misc. feature: contig 2L_1_5 1..50000(1)	FBpp0077783:c.22+34G>A
2L mapping	203977	SNV	1	G	T	49	100	36.3673	Gene: FBgn0031231, Misc. feature: contig 2L_1_5 1..50000(1)	FBpp0077783:c.23-16G>T
2L mapping	204925	SNV	1	A	C	52	100	33.5962	Exon: Exon, Gene: FBgn0031232, Misc. feature: contig 2L_1_5 1..50000(1), mRNA: FBgn0031232, mRNA: FBgn0031232
2L mapping	206206	Insertion	1	-	T	41	97.561	35.625	Gene: FBgn0031232, Misc. feature: contig 2L_1_5 1..50000(1)
2L mapping	206256	SNV	1	G	T	49	100	34.6122	Gene: FBgn0031232, Misc. feature: contig 2L_1_5 1..50000(1)
2L mapping	206592	SNV	1	G	A	52	100	34.4038	Gene: FBgn0031232, Misc. feature: contig 2L_1_5 1..50000(1)
2L mapping	206999	SNV	1	G	A	45	100	35.4889	Gene: FBgn0031232, Misc. feature: contig 2L_1_5 1..50000(1)
2L mapping	207200	Deletion	2	AA	-	38	92.1053	33.1143	Exon: Exon, Gene: FBgn0031232, Gene: FBgn0031233, Misc. feature: contig 2L_1_5 1..50000(1), mRNA: FBgn0031233
2L mapping	207688	SNV	1	T	A	41	100	34.9756	Gene: FBgn0031233, Misc. feature: contig 2L_1_5 1..50000(1)	FBpp0077784:c.[121-23T>A]; FBpp0304615:c.[121-23T>A]; FBpp0304616:c.[121-23T>A]
2L mapping	208335	SNV	1	A	T	38	100	35.7895	CDS: FBgn0031233, CDS: FBgn0031233, CDS: FBgn0031233, Exon: Exon, Gene: FBgn0031233, Misc. feature: contig 2L_1_5 1..50000(1), mRNA: FBgn0031233, mRNA: FBgn0031233, mRNA: FBgn0031233	FBpp0304616:c.[745A>T]; FBpp0304615:c.[745A>T]; FBpp0077784:c.[745A>T]	FBpp0304616:p.[Ile249Phe]; FBpp0304615:p.[Ile249Phe]; FBpp0077784:p.[Ile249Phe]
2L mapping	209243	SNV	1	T	C	41	97.561	33.075	CDS: FBgn0031233, CDS: FBgn0031233, CDS: FBgn0031233, Exon: Exon, Exon: Exon, Gene: FBgn0031233, Misc. feature: contig 2L_1_5 1..50000(1), mRNA: FBgn0031233, mRNA: FBgn0031233, mRNA: FBgn0031233	FBpp0304615:c.[1533T>C]; FBpp0077784:c.[1533T>C]; FBpp0304616:c.[1533T>C]
2L mapping	210726	SNV	1	T	C	51	100	33.7647	Misc. feature: contig 2L_1_5 1..50000(1)
2L mapping	210762	SNV	1	A	G	57	100	35.1228	Exon: Exon, Gene: FBgn0266557, Misc. feature: contig 2L_1_5 1..50000(1), mRNA: FBgn0266557, mRNA: FBgn0266557, mRNA: FBgn0266557, mRNA: FBgn0266557, mRNA: FBgn0266557, mRNA: FBgn0266557
2L mapping	211139	SNV	1	C	A	51	100	35.8824	Exon: Exon, Gene: FBgn0266557, Misc. feature: contig 2L_1_5 1..50000(1), mRNA: FBgn0266557, mRNA: FBgn0266557, mRNA: FBgn0266557, mRNA: FBgn0266557, mRNA: FBgn0266557, mRNA: FBgn0266557
2L mapping	211371	SNV	1	C	G	44	100	35.2955	Exon: Exon, Gene: FBgn0266557, Misc. feature: contig 2L_1_5 1..50000(1), mRNA: FBgn0266557, mRNA: FBgn0266557, mRNA: FBgn0266557, mRNA: FBgn0266557, mRNA: FBgn0266557, mRNA: FBgn0266557
2L mapping	211501	SNV	1	T	C	48	100	36.1458	Exon: Exon, Gene: FBgn0266557, Misc. feature: contig 2L_1_5 1..50000(1), mRNA: FBgn0266557, mRNA: FBgn0266557, mRNA: FBgn0266557, mRNA: FBgn0266557, mRNA: FBgn0266557, mRNA: FBgn0266557
2L mapping	211587	SNV	1	T	G	45	100	33.6444	Exon: Exon, Gene: FBgn0266557, Misc. feature: contig 2L_1_5 1..50000(1), mRNA: FBgn0266557, mRNA: FBgn0266557, mRNA: FBgn0266557, mRNA: FBgn0266557, mRNA: FBgn0266557, mRNA: FBgn0266557
2L mapping	212317	SNV	1	A	T	39	100	35	CDS: FBgn0266557, CDS: FBgn0266557, CDS: FBgn0266557, CDS: FBgn0266557, CDS: FBgn0266557, CDS: FBgn0266557, Exon: Exon, Gene: FBgn0266557, Misc. feature: contig 2L_1_5 1..50000(1), mRNA: FBgn0266557, mRNA: FBgn0266557, mRNA: FBgn0266557, mRNA: FBgn0266557, mRNA: FBgn0266557, mRNA: FBgn0266557	FBpp0300573:c.[15900T>A]; FBpp0300574:c.[15627T>A]; FBpp0077803:c.[15837T>A]; FBpp0300575:c.[15444T>A]; FBpp0077804:c.[6324T>A]; FBpp0289115:c.[16422T>A]
2L mapping	213547	SNV	1	A	G	46	100	32.8913	CDS: FBgn0266557, CDS: FBgn0266557, CDS: FBgn0266557, CDS: FBgn0266557, CDS: FBgn0266557, CDS: FBgn0266557, Exon: Exon, Gene: FBgn0266557, Misc. feature: contig 2L_1_5 1..50000(1), mRNA: FBgn0266557, mRNA: FBgn0266557, mRNA: FBgn0266557, mRNA: FBgn0266557, mRNA: FBgn0266557, mRNA: FBgn0266557	FBpp0077804:c.[5094T>C]; FBpp0077803:c.[14607T>C]; FBpp0300574:c.[14397T>C]; FBpp0289115:c.[15192T>C]; FBpp0300575:c.[14214T>C]; FBpp0300573:c.[14670T>C]
2L mapping	214057	SNV	1	T	C	39	100	35.641	CDS: FBgn0266557, CDS: FBgn0266557, CDS: FBgn0266557, CDS: FBgn0266557, CDS: FBgn0266557, CDS: FBgn0266557, Exon: Exon, Gene: FBgn0266557, Misc. feature: contig 2L_1_5 1..50000(1), mRNA: FBgn0266557, mRNA: FBgn0266557, mRNA: FBgn0266557, mRNA: FBgn0266557, mRNA: FBgn0266557, mRNA: FBgn0266557	FBpp0077804:c.[4584A>G]; FBpp0300575:c.[13704A>G]; FBpp0300573:c.[14160A>G]; FBpp0077803:c.[14097A>G]; FBpp0300574:c.[13887A>G]; FBpp0289115:c.[14682A>G]
2L mapping	214264	SNV	1	C	A	47	100	34.0638	CDS: FBgn0266557, CDS: FBgn0266557, CDS: FBgn0266557, CDS: FBgn0266557, CDS: FBgn0266557, CDS: FBgn0266557, Exon: Exon, Gene: FBgn0266557, Misc. feature: contig 2L_1_5 1..50000(1), mRNA: FBgn0266557, mRNA: FBgn0266557, mRNA: FBgn0266557, mRNA: FBgn0266557, mRNA: FBgn0266557, mRNA: FBgn0266557	FBpp0300573:c.[13953G>T]; FBpp0077803:c.[13890G>T]; FBpp0300575:c.[13497G>T]; FBpp0300574:c.[13680G>T]; FBpp0077804:c.[4377G>T]; FBpp0289115:c.[14475G>T]	FBpp0300573:p.[Gln4651His]; FBpp0077803:p.[Gln4630His]; FBpp0300575:p.[Gln4499His]; FBpp0300574:p.[Gln4560His]; FBpp0077804:p.[Gln1459His]; FBpp0289115:p.[Gln4825His]
2L mapping	215900	SNV	1	A	C	47	100	36.2766	CDS: FBgn0266557, CDS: FBgn0266557, CDS: FBgn0266557, CDS: FBgn0266557, CDS: FBgn0266557, CDS: FBgn0266557, Exon: Exon, Gene: FBgn0266557, Misc. feature: contig 2L_1_5 1..50000(1), mRNA: FBgn0266557, mRNA: FBgn0266557, mRNA: FBgn0266557, mRNA: FBgn0266557, mRNA: FBgn0266557, mRNA: FBgn0266557	FBpp0300575:c.[12048T>G]; FBpp0300574:c.[12231T>G]; FBpp0300573:c.[12504T>G]; FBpp0077803:c.[12441T>G]; FBpp0077804:c.[2928T>G]; FBpp0289115:c.[13026T>G]
2L mapping	216052	SNV	1	C	A	49	97.9592	35.875	Gene: FBgn0266557, Misc. feature: contig 2L_1_5 1..50000(1)	FBpp0077803:c.[12333+25G>T]; FBpp0300575:c.[11940+25G>T]; FBpp0300573:c.[12396+25G>T]; FBpp0077804:c.[2820+25G>T]; FBpp0300574:c.[12123+25G>T]; FBpp0289115:c.[12918+25G>T]
2L mapping	216918	SNV	1	T	C	31	100	33.3226	CDS: FBgn0266557, CDS: FBgn0266557, CDS: FBgn0266557, CDS: FBgn0266557, CDS: FBgn0266557, CDS: FBgn0266557, Exon: Exon, Gene: FBgn0266557, Misc. feature: contig 2L_1_5 1..50000(1), mRNA: FBgn0266557, mRNA: FBgn0266557, mRNA: FBgn0266557, mRNA: FBgn0266557, mRNA: FBgn0266557, mRNA: FBgn0266557	FBpp0077804:c.[2106A>G]; FBpp0300573:c.[11682A>G]; FBpp0300574:c.[11409A>G]; FBpp0077803:c.[11619A>G]; FBpp0289115:c.[12204A>G]; FBpp0300575:c.[11226A>G]
2L mapping	217179	SNV	1	G	A	39	100	35.1282	CDS: FBgn0266557, CDS: FBgn0266557, CDS: FBgn0266557, CDS: FBgn0266557, CDS: FBgn0266557, CDS: FBgn0266557, Exon: Exon, Gene: FBgn0266557, Misc. feature: contig 2L_1_5 1..50000(1), mRNA: FBgn0266557, mRNA: FBgn0266557, mRNA: FBgn0266557, mRNA: FBgn0266557, mRNA: FBgn0266557, mRNA: FBgn0266557	FBpp0289115:c.[11943C>T]; FBpp0300573:c.[11421C>T]; FBpp0077803:c.[11358C>T]; FBpp0300575:c.[10965C>T]; FBpp0077804:c.[1845C>T]; FBpp0300574:c.[11148C>T]
2L mapping	218380	SNV	1	G	A	36	100	35.1944	CDS: FBgn0266557, CDS: FBgn0266557, CDS: FBgn0266557, CDS: FBgn0266557, CDS: FBgn0266557, CDS: FBgn0266557, Exon: Exon, Gene: FBgn0266557, Misc. feature: contig 2L_1_5 1..50000(1), mRNA: FBgn0266557, mRNA: FBgn0266557, mRNA: FBgn0266557, mRNA: FBgn0266557, mRNA: FBgn0266557, mRNA: FBgn0266557	FBpp0300573:c.[10220C>T]; FBpp0077804:c.[644C>T]; FBpp0077803:c.[10157C>T]; FBpp0289115:c.[10742C>T]; FBpp0300575:c.[9764C>T]; FBpp0300574:c.[9947C>T]	FBpp0300573:p.[Thr3407Ile]; FBpp0077804:p.[Thr215Ile]; FBpp0077803:p.[Thr3386Ile]; FBpp0289115:p.[Thr3581Ile]; FBpp0300575:p.[Thr3255Ile]; FBpp0300574:p.[Thr3316Ile]
2L mapping	218490	SNV	1	C	T	41	100	34.6585	CDS: FBgn0266557, CDS: FBgn0266557, CDS: FBgn0266557, CDS: FBgn0266557, CDS: FBgn0266557, CDS: FBgn0266557, Exon: Exon, Gene: FBgn0266557, Misc. feature: contig 2L_1_5 1..50000(1), mRNA: FBgn0266557, mRNA: FBgn0266557, mRNA: FBgn0266557, mRNA: FBgn0266557, mRNA: FBgn0266557, mRNA: FBgn0266557	FBpp0300573:c.[10110G>A]; FBpp0300575:c.[9654G>A]; FBpp0077804:c.[534G>A]; FBpp0289115:c.[10632G>A]; FBpp0077803:c.[10047G>A]; FBpp0300574:c.[9837G>A]
2L mapping	218829	SNV	1	C	A	47	97.8723	35.1739	CDS: FBgn0266557, CDS: FBgn0266557, CDS: FBgn0266557, CDS: FBgn0266557, CDS: FBgn0266557, CDS: FBgn0266557, Exon: Exon, Gene: FBgn0266557, Misc. feature: contig 2L_1_5 1..50000(1), mRNA: FBgn0266557, mRNA: FBgn0266557, mRNA: FBgn0266557, mRNA: FBgn0266557, mRNA: FBgn0266557, mRNA: FBgn0266557	FBpp0289115:c.[10293G>T]; FBpp0300573:c.[9771G>T]; FBpp0077803:c.[9708G>T]; FBpp0300575:c.[9315G>T]; FBpp0300574:c.[9498G>T]; FBpp0077804:c.[195G>T]
2L mapping	218908	SNV	1	A	G	42	100	35.1429	Gene: FBgn0266557, Misc. feature: contig 2L_1_5 1..50000(1)	FBpp0300575:c.[9259-23T>C]; FBpp0077803:c.[9652-23T>C]; FBpp0077804:c.[139-23T>C]; FBpp0300574:c.[9442-23T>C]; FBpp0289115:c.[10237-23T>C]; FBpp0300573:c.[9715-23T>C]
2L mapping	219091	SNV	1	C	T	47	100	34.8298	Gene: FBgn0266557, Misc. feature: contig 2L_1_5 1..50000(1)	FBpp0300573:c.[9715-206G>A]; FBpp0077803:c.[9652-206G>A]; FBpp0300574:c.[9442-206G>A]; FBpp0289115:c.[10237-206G>A]; FBpp0300575:c.[9259-206G>A]; FBpp0077804:c.[139-206G>A]
2L mapping	219102	SNV	1	A	T	43	97.6744	33.9286	Gene: FBgn0266557, Misc. feature: contig 2L_1_5 1..50000(1)	FBpp0077803:c.[9652-217T>A]; FBpp0077804:c.[139-217T>A]; FBpp0289115:c.[10237-217T>A]; FBpp0300573:c.[9715-217T>A]; FBpp0300575:c.[9259-217T>A]; FBpp0300574:c.[9442-217T>A]
2L mapping	219124	SNV	1	T	C	42	100	33.8095	Gene: FBgn0266557, Misc. feature: contig 2L_1_5 1..50000(1)	FBpp0300573:c.[9715-239A>G]; FBpp0300575:c.[9259-239A>G]; FBpp0300574:c.[9442-239A>G]; FBpp0077803:c.[9652-239A>G]; FBpp0289115:c.[10237-239A>G]; FBpp0077804:c.[139-239A>G]
2L mapping	219902	SNV	1	T	G	39	100	33.9487	Misc. RNA: FBgn0265151, Exon: Exon, Gene: FBgn0266557, Gene: FBgn0265151, Misc. feature: contig 2L_1_5 1..50000(1)	FBpp0077803:c.[9652-1017A>C]; FBpp0077804:c.[139-1017A>C]; FBpp0300575:c.[9259-1017A>C]; FBpp0300573:c.[9715-1017A>C]; FBpp0300574:c.[9442-1017A>C]; FBpp0289115:c.[10237-1017A>C]
2L mapping	220226	SNV	1	T	C	51	100	33.1176	Gene: FBgn0266557, Misc. feature: contig 2L_1_5 1..50000(1)	FBpp0300574:c.[9442-1341A>G]; FBpp0300573:c.[9715-1341A>G]; FBpp0077804:c.[138+1280A>G]; FBpp0289115:c.[10237-1341A>G]; FBpp0077803:c.[9652-1341A>G]; FBpp0300575:c.[9259-1341A>G]
2L mapping	220318	Insertion	1	-	A	38	81.5789	35.8065	Gene: FBgn0266557, Misc. feature: contig 2L_1_5 1..50000(1)	FBpp0289115:c.[10237-1433_10237-1432insT]; FBpp0300575:c.[9259-1433_9259-1432insT]; FBpp0077803:c.[9652-1433_9652-1432insT]; FBpp0300574:c.[9442-1433_9442-1432insT]; FBpp0077804:c.[138+1188_138+1189insT]; FBpp0300573:c.[9715-1433_9715-1432insT]
2L mapping	220651	SNV	1	T	C	35	100	34.6	Gene: FBgn0266557, Misc. feature: contig 2L_1_5 1..50000(1)	FBpp0300574:c.[9442-1766A>G]; FBpp0300575:c.[9259-1766A>G]; FBpp0289115:c.[10237-1766A>G]; FBpp0077804:c.[138+855A>G]; FBpp0300573:c.[9715-1766A>G]; FBpp0077803:c.[9652-1766A>G]
2L mapping	220693	SNV	1	G	C	43	100	34.1628	Gene: FBgn0266557, Misc. feature: contig 2L_1_5 1..50000(1)	FBpp0077804:c.[138+813C>G]; FBpp0300573:c.[9715-1808C>G]; FBpp0077803:c.[9652-1808C>G]; FBpp0289115:c.[10237-1808C>G]; FBpp0300575:c.[9259-1808C>G]; FBpp0300574:c.[9442-1808C>G]
2L mapping	220765	SNV	1	G	C	38	100	35.6316	Gene: FBgn0266557, Misc. feature: contig 2L_1_5 1..50000(1)	FBpp0077804:c.[138+741C>G]; FBpp0077803:c.[9652-1880C>G]; FBpp0300573:c.[9715-1880C>G]; FBpp0289115:c.[10237-1880C>G]; FBpp0300574:c.[9442-1880C>G]; FBpp0300575:c.[9259-1880C>G]
2L mapping	220938	SNV	1	G	T	45	100	34.0889	Gene: FBgn0266557, Misc. feature: contig 2L_1_5 1..50000(1)	FBpp0077804:c.[138+568C>A]; FBpp0289115:c.[10237-2053C>A]; FBpp0077803:c.[9652-2053C>A]; FBpp0300573:c.[9715-2053C>A]; FBpp0300575:c.[9259-2053C>A]; FBpp0300574:c.[9442-2053C>A]
2L mapping	221136	SNV	1	C	G	49	97.9592	34.1875	Gene: FBgn0266557, Misc. feature: contig 2L_1_5 1..50000(1)	FBpp0077804:c.[138+370G>C]; FBpp0300574:c.[9442-2251G>C]; FBpp0300573:c.[9715-2251G>C]; FBpp0077803:c.[9652-2251G>C]; FBpp0300575:c.[9259-2251G>C]; FBpp0289115:c.[10237-2251G>C]
2L mapping	221192	SNV	1	C	A	48	100	35.3333	Gene: FBgn0266557, Misc. feature: contig 2L_1_5 1..50000(1)	FBpp0077804:c.[138+314G>T]; FBpp0300574:c.[9442-2307G>T]; FBpp0300573:c.[9715-2307G>T]; FBpp0077803:c.[9652-2307G>T]; FBpp0300575:c.[9259-2307G>T]; FBpp0289115:c.[10237-2307G>T]
2L mapping	221912	SNV	1	C	G	34	100	36.0588	Exon: Exon, Gene: FBgn0266557, Misc. feature: contig 2L_1_5 1..50000(1), mRNA: FBgn0266557	FBpp0300575:c.[9259-3027G>C]; FBpp0300573:c.[9715-3027G>C]; FBpp0077803:c.[9652-3027G>C]; FBpp0300574:c.[9442-3027G>C]; FBpp0289115:c.[10237-3027G>C]
2L mapping	222148	SNV	1	G	T	39	94.8718	33.8649	Gene: FBgn0266557, Misc. feature: contig 2L_1_5 1..50000(1)	FBpp0289115:c.[10237-3263C>A]; FBpp0300574:c.[9442-3263C>A]; FBpp0300573:c.[9715-3263C>A]; FBpp0077803:c.[9652-3263C>A]; FBpp0300575:c.[9259-3263C>A]
2L mapping	222273	SNV	1	A	C	42	100	33.119	Gene: FBgn0266557, Misc. feature: contig 2L_1_5 1..50000(1)	FBpp0300573:c.[9715-3388T>G]; FBpp0077803:c.[9652-3388T>G]; FBpp0289115:c.[10237-3388T>G]; FBpp0300575:c.[9259-3388T>G]; FBpp0300574:c.[9442-3388T>G]
2L mapping	222410	SNV	1	A	G	31	100	35.8387	Gene: FBgn0266557, Misc. feature: contig 2L_1_5 1..50000(1)	FBpp0300574:c.[9442-3525T>C]; FBpp0289115:c.[10237-3525T>C]; FBpp0077803:c.[9652-3525T>C]; FBpp0300575:c.[9259-3525T>C]; FBpp0300573:c.[9715-3525T>C]
2L mapping	222501	SNV	1	T	C	29	100	34.0345	Gene: FBgn0266557, Misc. feature: contig 2L_1_5 1..50000(1)	FBpp0289115:c.[10236+3615A>G]; FBpp0300574:c.[9441+3615A>G]; FBpp0300573:c.[9714+3615A>G]; FBpp0077803:c.[9651+3615A>G]; FBpp0300575:c.[9259-3616A>G]
2L mapping	223731	SNV	1	T	A	46	100	35.5217	Misc. RNA: FBgn0265153, Exon: Exon, Gene: FBgn0266557, Gene: FBgn0265153, Misc. feature: contig 2L_1_5 1..50000(1)	FBpp0289115:c.[10236+2385A>T]; FBpp0300575:c.[9258+3641A>T]; FBpp0300573:c.[9714+2385A>T]; FBpp0300574:c.[9441+2385A>T]; FBpp0077803:c.[9651+2385A>T]
2L mapping	223843	SNV	1	T	C	40	100	33.975	Misc. RNA: FBgn0265153, Exon: Exon, Gene: FBgn0266557, Gene: FBgn0265153, Misc. feature: contig 2L_1_5 1..50000(1)	FBpp0077803:c.[9651+2273A>G]; FBpp0300574:c.[9441+2273A>G]; FBpp0300573:c.[9714+2273A>G]; FBpp0289115:c.[10236+2273A>G]; FBpp0300575:c.[9258+3529A>G]
2L mapping	224091	SNV	1	G	A	32	100	35.7188	Misc. RNA: FBgn0265153, Exon: Exon, Gene: FBgn0266557, Gene: FBgn0265153, Misc. feature: contig 2L_1_5 1..50000(1)	FBpp0300573:c.[9714+2025C>T]; FBpp0289115:c.[10236+2025C>T]; FBpp0300574:c.[9441+2025C>T]; FBpp0077803:c.[9651+2025C>T]; FBpp0300575:c.[9258+3281C>T]
2L mapping	224964	SNV	1	T	G	36	100	35.8056	Gene: FBgn0266557, Misc. feature: contig 2L_1_5 1..50000(1)	FBpp0300574:c.[9441+1152A>C]; FBpp0077803:c.[9651+1152A>C]; FBpp0300573:c.[9714+1152A>C]; FBpp0300575:c.[9258+2408A>C]; FBpp0289115:c.[10236+1152A>C]
2L mapping	225718	SNV	1	T	A	31	100	35.129	Gene: FBgn0266557, Misc. feature: contig 2L_1_5 1..50000(1)	FBpp0300573:c.[9714+398A>T]; FBpp0077803:c.[9651+398A>T]; FBpp0289115:c.[10236+398A>T]; FBpp0300574:c.[9441+398A>T]; FBpp0300575:c.[9258+1654A>T]
2L mapping	225893	SNV	1	A	T	22	36.3636	37	Gene: FBgn0266557, Misc. feature: contig 2L_1_5 1..50000(1)	FBpp0300574:c.[9441+223T>A]; FBpp0300573:c.[9714+223T>A]; FBpp0077803:c.[9651+223T>A]; FBpp0289115:c.[10236+223T>A]; FBpp0300575:c.[9258+1479T>A]
2L mapping	225894	SNV	1	T	C	21	57.1429	27.1667	Gene: FBgn0266557, Misc. feature: contig 2L_1_5 1..50000(1)	FBpp0077803:c.[9651+222A>G]; FBpp0300575:c.[9258+1478A>G]; FBpp0289115:c.[10236+222A>G]; FBpp0300573:c.[9714+222A>G]; FBpp0300574:c.[9441+222A>G]
2L mapping	226835	SNV	1	T	C	41	100	34.8293	Gene: FBgn0266557, Misc. feature: contig 2L_1_5 1..50000(1)	FBpp0300574:c.[9049-327A>G]; FBpp0077803:c.[9259-327A>G]; FBpp0289115:c.[9844-327A>G]; FBpp0300573:c.[9322-327A>G]; FBpp0300575:c.[9258+537A>G]
2L mapping	228194	SNV	1	A	G	37	100	33.1351	Misc. RNA: FBgn0265152, CDS: FBgn0266557, CDS: FBgn0266557, CDS: FBgn0266557, CDS: FBgn0266557, CDS: FBgn0266557, Exon: Exon, Exon: Exon, Exon: Exon, Gene: FBgn0266557, Gene: FBgn0265152, Misc. feature: contig 2L_1_5 1..50000(1), mRNA: FBgn0266557, mRNA: FBgn0266557, mRNA: FBgn0266557, mRNA: FBgn0266557, mRNA: FBgn0266557	FBpp0289115:c.[9021T>C]; FBpp0300575:c.[9021T>C]; FBpp0300573:c.[9084T>C]; FBpp0300574:c.[8811T>C]; FBpp0077803:c.[9021T>C]
2L mapping	228336	SNV	1	T	C	45	100	32	Misc. RNA: FBgn0265152, Exon: Exon, Gene: FBgn0266557, Gene: FBgn0265152, Misc. feature: contig 2L_1_5 1..50000(1)	FBpp0300575:c.[8934-55A>G]; FBpp0289115:c.[8934-55A>G]; FBpp0300574:c.[8724-55A>G]; FBpp0077803:c.[8934-55A>G]; FBpp0300573:c.[8997-55A>G]
2L mapping	228339	SNV	1	T	A	42	100	33.6667	Misc. RNA: FBgn0265152, Exon: Exon, Gene: FBgn0266557, Gene: FBgn0265152, Misc. feature: contig 2L_1_5 1..50000(1)	FBpp0300573:c.[8997-58A>T]; FBpp0300575:c.[8934-58A>T]; FBpp0300574:c.[8724-58A>T]; FBpp0077803:c.[8934-58A>T]; FBpp0289115:c.[8934-58A>T]
2L mapping	228351	SNV	1	A	G	38	100	33.5	Misc. RNA: FBgn0265152, Exon: Exon, Gene: FBgn0266557, Gene: FBgn0265152, Misc. feature: contig 2L_1_5 1..50000(1)	FBpp0300573:c.[8997-70T>C]; FBpp0077803:c.[8934-70T>C]; FBpp0300574:c.[8724-70T>C]; FBpp0289115:c.[8934-70T>C]; FBpp0300575:c.[8934-70T>C]
2L mapping	228808	Insertion	3	-	CAC	29	89.6552	35.6154	Gene: FBgn0266557, Misc. feature: contig 2L_1_5 1..50000(1)	FBpp0300575:c.[8933+365_8933+366insGTG]; FBpp0077803:c.[8933+365_8933+366insGTG]; FBpp0300574:c.[8724-527_8724-526insGTG]; FBpp0289115:c.[8933+365_8933+366insGTG]; FBpp0300573:c.[8996+365_8996+366insGTG]
2L mapping	228842	SNV	1	A	C	43	100	35.2558	Gene: FBgn0266557, Misc. feature: contig 2L_1_5 1..50000(1)	FBpp0300573:c.[8996+331T>G]; FBpp0289115:c.[8933+331T>G]; FBpp0300575:c.[8933+331T>G]; FBpp0077803:c.[8933+331T>G]; FBpp0300574:c.[8724-561T>G]
2L mapping	228903	SNV	1	T	C	53	100	33.9811	Gene: FBgn0266557, Misc. feature: contig 2L_1_5 1..50000(1)	FBpp0077803:c.[8933+270A>G]; FBpp0300575:c.[8933+270A>G]; FBpp0300574:c.[8724-622A>G]; FBpp0300573:c.[8996+270A>G]; FBpp0289115:c.[8933+270A>G]
2L mapping	229060	SNV	1	A	G	36	97.2222	35.0571	Gene: FBgn0266557, Misc. feature: contig 2L_1_5 1..50000(1)	FBpp0300574:c.[8724-779T>C]; FBpp0300575:c.[8933+113T>C]; FBpp0300573:c.[8996+113T>C]; FBpp0077803:c.[8933+113T>C]; FBpp0289115:c.[8933+113T>C]
2L mapping	229424	SNV	1	T	G	52	100	36.2115	Gene: FBgn0266557, Misc. feature: contig 2L_1_5 1..50000(1)	FBpp0300574:c.[8723+1114A>C]; FBpp0077803:c.[8724-42A>C]; FBpp0289115:c.[8724-42A>C]; FBpp0300575:c.[8724-42A>C]; FBpp0300573:c.[8787-42A>C]
2L mapping	229557	Insertion	2	-	AT	50	82	35.1098	Gene: FBgn0266557, Misc. feature: contig 2L_1_5 1..50000(1)	FBpp0300574:c.[8723+981_8723+982insAT]; FBpp0300573:c.[8787-175_8787-174insAT]; FBpp0300575:c.[8724-175_8724-174insAT]; FBpp0077803:c.[8724-175_8724-174insAT]; FBpp0289115:c.[8724-175_8724-174insAT]
2L mapping	229684	Insertion	1	-	T	30	63.3333	36.0526	Gene: FBgn0266557, Misc. feature: contig 2L_1_5 1..50000(1)	FBpp0300573:c.[8786+246_8786+247insA]; FBpp0077803:c.[8724-302_8724-301insA]; FBpp0300574:c.[8723+854_8723+855insA]; FBpp0300575:c.[8724-302_8724-301insA]; FBpp0289115:c.[8724-302_8724-301insA]
2L mapping	229849	SNV	1	T	C	39	100	33.0769	Gene: FBgn0266557, Misc. feature: contig 2L_1_5 1..50000(1)	FBpp0300573:c.[8786+81A>G]; FBpp0300574:c.[8723+689A>G]; FBpp0077803:c.[8724-467A>G]; FBpp0289115:c.[8724-467A>G]; FBpp0300575:c.[8724-467A>G]
2L mapping	230348	Insertion	1	-	A	35	88.5714	36.7419	Gene: FBgn0266557, Misc. feature: contig 2L_1_5 1..50000(1)	FBpp0300573:c.[8738+190_8738+191insT]; FBpp0077803:c.[8723+190_8723+191insT]; FBpp0289115:c.[8723+190_8723+191insT]; FBpp0300575:c.[8723+190_8723+191insT]; FBpp0300574:c.[8723+190_8723+191insT]
2L mapping	231324	SNV	1	A	T	56	98.2143	35.2364	Gene: FBgn0266557, Misc. feature: contig 2L_1_5 1..50000(1)	FBpp0289115:c.[8357-290T>A]; FBpp0300573:c.[8372-290T>A]; FBpp0300575:c.[8357-290T>A]; FBpp0077803:c.[8357-290T>A]; FBpp0300574:c.[8357-290T>A]
2L mapping	232131	SNV	1	A	T	26	100	36.8462	Gene: FBgn0266557, Misc. feature: contig 2L_1_5 1..50000(1)	FBpp0300574:c.[8218-30T>A]; FBpp0300573:c.[8218-30T>A]; FBpp0300575:c.[8218-30T>A]; FBpp0077803:c.[8218-30T>A]; FBpp0289115:c.[8218-30T>A]
2L mapping	233746	SNV	1	T	C	35	100	33.4571	CDS: FBgn0031235, Exon: Exon, Gene: FBgn0266557, Gene: FBgn0031235, Misc. feature: contig 2L_1_5 1..50000(1), mRNA: FBgn0031235	FBpp0077785:c.[1113T>C]; FBpp0300575:c.[8129+251A>G]; FBpp0300574:c.[8129+251A>G]; FBpp0077803:c.[8129+251A>G]; FBpp0289115:c.[8129+251A>G]; FBpp0300573:c.[8129+251A>G]
2L mapping	234221	Deletion	1	T	-	59	88.1356	33.4808	Gene: FBgn0266557, Misc. feature: contig 2L_1_5 1..50000(1)	FBpp0300574:c.[7951+16delA]; FBpp0289115:c.[7951+16delA]; FBpp0300575:c.[7951+16delA]; FBpp0077803:c.[7951+16delA]; FBpp0300573:c.[7951+16delA]
2L mapping	234412	SNV	1	C	T	41	100	35.0244	CDS: FBgn0266557, CDS: FBgn0266557, CDS: FBgn0266557, CDS: FBgn0266557, CDS: FBgn0266557, Exon: Exon, Gene: FBgn0266557, Misc. feature: contig 2L_1_5 1..50000(1), mRNA: FBgn0266557, mRNA: FBgn0266557, mRNA: FBgn0266557, mRNA: FBgn0266557, mRNA: FBgn0266557	FBpp0289115:c.[7776G>A]; FBpp0300575:c.[7776G>A]; FBpp0300574:c.[7776G>A]; FBpp0300573:c.[7776G>A]; FBpp0077803:c.[7776G>A]
2L mapping	235852	SNV	1	T	A	35	100	35.7714	CDS: FBgn0266557, CDS: FBgn0266557, CDS: FBgn0266557, CDS: FBgn0266557, CDS: FBgn0266557, Exon: Exon, Gene: FBgn0266557, Misc. feature: contig 2L_1_5 1..50000(1), mRNA: FBgn0266557, mRNA: FBgn0266557, mRNA: FBgn0266557, mRNA: FBgn0266557, mRNA: FBgn0266557	FBpp0077803:c.[6336A>T]; FBpp0300575:c.[6336A>T]; FBpp0300573:c.[6336A>T]; FBpp0300574:c.[6336A>T]; FBpp0289115:c.[6336A>T]
2L mapping	236383	SNV	1	G	A	63	100	36.5873	CDS: FBgn0266557, CDS: FBgn0266557, CDS: FBgn0266557, CDS: FBgn0266557, CDS: FBgn0266557, Exon: Exon, Gene: FBgn0266557, Misc. feature: contig 2L_1_5 1..50000(1), mRNA: FBgn0266557, mRNA: FBgn0266557, mRNA: FBgn0266557, mRNA: FBgn0266557, mRNA: FBgn0266557	FBpp0077803:c.[5805C>T]; FBpp0300574:c.[5805C>T]; FBpp0300575:c.[5805C>T]; FBpp0300573:c.[5805C>T]; FBpp0289115:c.[5805C>T]
2L mapping	236608	SNV	1	A	T	50	98	35.5102	CDS: FBgn0266557, CDS: FBgn0266557, CDS: FBgn0266557, CDS: FBgn0266557, CDS: FBgn0266557, Exon: Exon, Gene: FBgn0266557, Misc. feature: contig 2L_1_5 1..50000(1), mRNA: FBgn0266557, mRNA: FBgn0266557, mRNA: FBgn0266557, mRNA: FBgn0266557, mRNA: FBgn0266557	FBpp0077803:c.[5580T>A]; FBpp0300573:c.[5580T>A]; FBpp0289115:c.[5580T>A]; FBpp0300575:c.[5580T>A]; FBpp0300574:c.[5580T>A]	FBpp0077803:p.[Asn1860Lys]; FBpp0300573:p.[Asn1860Lys]; FBpp0289115:p.[Asn1860Lys]; FBpp0300575:p.[Asn1860Lys]; FBpp0300574:p.[Asn1860Lys]
2L mapping	236757	SNV	1	C	G	60	98.3333	35.2881	CDS: FBgn0266557, CDS: FBgn0266557, CDS: FBgn0266557, CDS: FBgn0266557, CDS: FBgn0266557, Exon: Exon, Gene: FBgn0266557, Misc. feature: contig 2L_1_5 1..50000(1), mRNA: FBgn0266557, mRNA: FBgn0266557, mRNA: FBgn0266557, mRNA: FBgn0266557, mRNA: FBgn0266557	FBpp0300574:c.[5431G>C]; FBpp0289115:c.[5431G>C]; FBpp0077803:c.[5431G>C]; FBpp0300575:c.[5431G>C]; FBpp0300573:c.[5431G>C]	FBpp0300574:p.[Ala1811Pro]; FBpp0289115:p.[Ala1811Pro]; FBpp0077803:p.[Ala1811Pro]; FBpp0300575:p.[Ala1811Pro]; FBpp0300573:p.[Ala1811Pro]
2L mapping	236866	SNV	1	G	A	40	100	34.075	CDS: FBgn0266557, CDS: FBgn0266557, CDS: FBgn0266557, CDS: FBgn0266557, CDS: FBgn0266557, Exon: Exon, Gene: FBgn0266557, Misc. feature: contig 2L_1_5 1..50000(1), mRNA: FBgn0266557, mRNA: FBgn0266557, mRNA: FBgn0266557, mRNA: FBgn0266557, mRNA: FBgn0266557	FBpp0300573:c.[5322C>T]; FBpp0300575:c.[5322C>T]; FBpp0077803:c.[5322C>T]; FBpp0300574:c.[5322C>T]; FBpp0289115:c.[5322C>T]
2L mapping	236923	SNV	1	C	G	43	100	33.093	CDS: FBgn0266557, CDS: FBgn0266557, CDS: FBgn0266557, CDS: FBgn0266557, CDS: FBgn0266557, Exon: Exon, Gene: FBgn0266557, Misc. feature: contig 2L_1_5 1..50000(1), mRNA: FBgn0266557, mRNA: FBgn0266557, mRNA: FBgn0266557, mRNA: FBgn0266557, mRNA: FBgn0266557	FBpp0077803:c.[5265G>C]; FBpp0300575:c.[5265G>C]; FBpp0300574:c.[5265G>C]; FBpp0289115:c.[5265G>C]; FBpp0300573:c.[5265G>C]	FBpp0077803:p.[Lys1755Asn]; FBpp0300575:p.[Lys1755Asn]; FBpp0300574:p.[Lys1755Asn]; FBpp0289115:p.[Lys1755Asn]; FBpp0300573:p.[Lys1755Asn]
2L mapping	237203	SNV	1	A	G	40	97.5	35.1282	CDS: FBgn0266557, CDS: FBgn0266557, CDS: FBgn0266557, CDS: FBgn0266557, CDS: FBgn0266557, Exon: Exon, Gene: FBgn0266557, Misc. feature: contig 2L_1_5 1..50000(1), mRNA: FBgn0266557, mRNA: FBgn0266557, mRNA: FBgn0266557, mRNA: FBgn0266557, mRNA: FBgn0266557	FBpp0300574:c.[4985T>C]; FBpp0289115:c.[4985T>C]; FBpp0300575:c.[4985T>C]; FBpp0300573:c.[4985T>C]; FBpp0077803:c.[4985T>C]	FBpp0300574:p.[Leu1662Pro]; FBpp0289115:p.[Leu1662Pro]; FBpp0300575:p.[Leu1662Pro]; FBpp0300573:p.[Leu1662Pro]; FBpp0077803:p.[Leu1662Pro]
2L mapping	237673	SNV	1	T	C	32	100	32.6875	CDS: FBgn0266557, CDS: FBgn0266557, CDS: FBgn0266557, CDS: FBgn0266557, CDS: FBgn0266557, Exon: Exon, Gene: FBgn0266557, Misc. feature: contig 2L_1_5 1..50000(1), mRNA: FBgn0266557, mRNA: FBgn0266557, mRNA: FBgn0266557, mRNA: FBgn0266557, mRNA: FBgn0266557	FBpp0289115:c.[4515A>G]; FBpp0077803:c.[4515A>G]; FBpp0300574:c.[4515A>G]; FBpp0300575:c.[4515A>G]; FBpp0300573:c.[4515A>G]
2L mapping	239989	SNV	1	G	A	28	100	33.1786	CDS: FBgn0266557, CDS: FBgn0266557, CDS: FBgn0266557, CDS: FBgn0266557, CDS: FBgn0266557, Exon: Exon, Gene: FBgn0266557, Misc. feature: contig 2L_1_5 1..50000(1), mRNA: FBgn0266557, mRNA: FBgn0266557, mRNA: FBgn0266557, mRNA: FBgn0266557, mRNA: FBgn0266557	FBpp0077803:c.[2199C>T]; FBpp0300573:c.[2199C>T]; FBpp0300574:c.[2199C>T]; FBpp0300575:c.[2199C>T]; FBpp0289115:c.[2199C>T]
2L mapping	242137	SNV	1	G	A	33	100	34.0303	CDS: FBgn0266557, CDS: FBgn0266557, CDS: FBgn0266557, CDS: FBgn0266557, CDS: FBgn0266557, Exon: Exon, Gene: FBgn0266557, Misc. feature: contig 2L_1_5 1..50000(1), mRNA: FBgn0266557, mRNA: FBgn0266557, mRNA: FBgn0266557, mRNA: FBgn0266557, mRNA: FBgn0266557	FBpp0300574:c.[51C>T]; FBpp0300575:c.[51C>T]; FBpp0077803:c.[51C>T]; FBpp0289115:c.[51C>T]; FBpp0300573:c.[51C>T]
2L mapping	242233	SNV	1	C	T	40	100	34.5	Gene: FBgn0266557, Misc. feature: contig 2L_1_5 1..50000(1)	FBpp0077803:c.[44+11G>A]; FBpp0300575:c.[44+11G>A]; FBpp0300573:c.[44+11G>A]; FBpp0300574:c.[44+11G>A]; FBpp0289115:c.[44+11G>A]
2L mapping	242336	SNV	1	A	G	42	97.619	36	Exon: Exon, Exon: Exon, Gene: FBgn0266557, Misc. feature: contig 2L_1_5 1..50000(1), mRNA: FBgn0266557, mRNA: FBgn0266557, mRNA: FBgn0266557, mRNA: FBgn0266557, mRNA: FBgn0266557
2L mapping	242798	SNV	1	A	C	50	98	33.898	Exon: Exon, Gene: FBgn0266557, Misc. feature: contig 2L_1_5 1..50000(1), mRNA: FBgn0266557
2L mapping	243207	SNV	1	C	T	43	100	35.5581	Gene: FBgn0266557, Misc. feature: contig 2L_1_5 1..50000(1)
2L mapping	243394	Insertion	1	-	A	35	71.4286	35.44	Gene: FBgn0266557, Misc. feature: contig 2L_1_5 1..50000(1)
2L mapping	243574	SNV	1	T	G	37	97.2973	34.5556	Gene: FBgn0266557, Misc. feature: contig 2L_1_5 1..50000(1)
2L mapping	243679	SNV	1	A	G	34	97.0588	34.6667	Gene: FBgn0266557, Misc. feature: contig 2L_1_5 1..50000(1)
2L mapping	243708	SNV	1	C	T	41	100	34.6341	Gene: FBgn0266557, Misc. feature: contig 2L_1_5 1..50000(1)
2L mapping	243732	SNV	1	A	C	47	100	33.5532	Gene: FBgn0266557, Misc. feature: contig 2L_1_5 1..50000(1)
2L mapping	243824	SNV	1	A	G	44	100	35.9773	Gene: FBgn0266557, Misc. feature: contig 2L_1_5 1..50000(1)
2L mapping	244077	Deletion	1	G	-	40	80	33.5312	Gene: FBgn0266557, Misc. feature: contig 2L_1_5 1..50000(1)
2L mapping	244079	Deletion	3	GCA	-	40	80	33.4062	Gene: FBgn0266557, Misc. feature: contig 2L_1_5 1..50000(1)
2L mapping	244085	Deletion	2	CA	-	32	100	34.1562	Gene: FBgn0266557, Misc. feature: contig 2L_1_5 1..50000(1)
2L mapping	244088	SNV	1	A	G	32	100	35.8125	Gene: FBgn0266557, Misc. feature: contig 2L_1_5 1..50000(1)
2L mapping	244268	SNV	1	A	G	41	100	36	Gene: FBgn0266557, Misc. feature: contig 2L_1_5 1..50000(1)
2L mapping	244368	SNV	1	T	A	48	100	34.4375	Gene: FBgn0266557, Misc. feature: contig 2L_1_5 1..50000(1)
2L mapping	244878	SNV	1	T	A	32	100	36.3125	Gene: FBgn0266557, Misc. feature: contig 2L_1_5 1..50000(1)
2L mapping	244894	SNV	1	T	C	34	100	34.3235	Gene: FBgn0266557, Misc. feature: contig 2L_1_5 1..50000(1)
2L mapping	245083	Insertion	1	-	T	41	95.122	36.0769	Gene: FBgn0266557, Misc. feature: contig 2L_1_5 1..50000(1)
2L mapping	246001	SNV	1	T	C	42	100	35	Gene: FBgn0266557, Misc. feature: contig 2L_1_5 1..50000(1)
2L mapping	246173	SNV	1	G	A	46	100	35.3261	Gene: FBgn0266557, Misc. feature: contig 2L_1_5 1..50000(1)
2L mapping	246490	SNV	1	G	C	43	100	33.814	Gene: FBgn0266557, Misc. feature: contig 2L_1_5 1..50000(1)
2L mapping	246803	Deletion	1	A	-	30	76.6667	24.6087	Gene: FBgn0266557, Misc. feature: contig 2L_1_5 1..50000(1)
2L mapping	246872	SNV	1	A	T	43	100	32.093	Gene: FBgn0266557, Misc. feature: contig 2L_1_5 1..50000(1)
2L mapping	248102	Deletion	1	C	-	51	90.1961	31.8696	Gene: FBgn0266557, Misc. feature: contig 2L_1_5 1..50000(1)
2L mapping	248839	SNV	1	A	G	53	100	34.6792	Gene: FBgn0266557, Misc. feature: contig 2L_1_5 1..50000(1)
2L mapping	250365	Deletion	1	T	-	53	88.6792	34.3191	Gene: FBgn0266557, Misc. feature: contig 2L_1_6 1..50000(1)
2L mapping	250924	Deletion	1	T	-	60	95	35.8947	Misc. feature: contig 2L_1_6 1..50000(1)
2L mapping	250955	SNV	1	T	C	56	100	34	Misc. feature: contig 2L_1_6 1..50000(1)
2L mapping	250993	MNV	2	CA	AG	37	100	34.9324	Misc. feature: contig 2L_1_6 1..50000(1)
2L mapping	252466	SNV	1	G	T	28	100	32.9286	Misc. feature: contig 2L_1_6 1..50000(1)
2L mapping	252572	Deletion	4	CAAT	-	45	64.4444	33.8276	Misc. feature: contig 2L_1_6 1..50000(1)
2L mapping	254355	SNV	1	G	C	31	100	31.8387	CDS: FBgn0031238, CDS: FBgn0031238, CDS: FBgn0031238, Exon: Exon, Exon: Exon, Gene: FBgn0031238, Misc. feature: contig 2L_1_6 1..50000(1), mRNA: FBgn0031238, mRNA: FBgn0031238, mRNA: FBgn0031238	FBpp0077799:c.[25C>G]; FBpp0307923:c.[25C>G]; FBpp0077800:c.[25C>G]	FBpp0077799:p.[His9Asp]; FBpp0307923:p.[His9Asp]; FBpp0077800:p.[His9Asp]
2L mapping	254400	Insertion	2	-	AA	31	77.4194	35.875	Exon: Exon, Gene: FBgn0031238, Misc. feature: contig 2L_1_6 1..50000(1), mRNA: FBgn0031238
2L mapping	254434	SNV	1	A	C	47	100	34.1064	Gene: FBgn0031238, Misc. feature: contig 2L_1_6 1..50000(1)
2L mapping	254456	SNV	1	A	G	39	100	32.0256	Gene: FBgn0031238, Misc. feature: contig 2L_1_6 1..50000(1)
2L mapping	255152	Deletion	2	CA	-	46	93.4783	33.6279	Gene: FBgn0031238, Misc. feature: contig 2L_1_6 1..50000(1)
2L mapping	255222	Replacement	4	G	AAAT	34	100	35.0294	Gene: FBgn0031238, Misc. feature: contig 2L_1_6 1..50000(1)
2L mapping	255265	SNV	1	A	T	47	100	35.0851	Gene: FBgn0031238, Misc. feature: contig 2L_1_6 1..50000(1)
2L mapping	255330	Replacement	3	T	AAA	33	75.7576	36.52	Gene: FBgn0031238, Misc. feature: contig 2L_1_6 1..50000(1)
2L mapping	255337	SNV	1	C	A	30	100	36.1	Gene: FBgn0031238, Misc. feature: contig 2L_1_6 1..50000(1)
2L mapping	255340	SNV	1	C	A	31	100	36.871	Gene: FBgn0031238, Misc. feature: contig 2L_1_6 1..50000(1)
2L mapping	255344	SNV	1	T	A	31	100	35.7742	Gene: FBgn0031238, Misc. feature: contig 2L_1_6 1..50000(1)
2L mapping	255352	SNV	1	C	A	28	100	34.8214	Gene: FBgn0031238, Misc. feature: contig 2L_1_6 1..50000(1)
2L mapping	255359	SNV	1	T	A	29	96.5517	35.0714	Gene: FBgn0031238, Misc. feature: contig 2L_1_6 1..50000(1)
2L mapping	255398	SNV	1	C	T	33	100	35.4848	Gene: FBgn0031238, Misc. feature: contig 2L_1_6 1..50000(1)
2L mapping	255472	SNV	1	G	A	46	100	35.8043	Gene: FBgn0031238, Misc. feature: contig 2L_1_6 1..50000(1)
2L mapping	255485	SNV	1	T	C	47	93.617	35.9773	Gene: FBgn0031238, Misc. feature: contig 2L_1_6 1..50000(1)
2L mapping	255487	SNV	1	C	A	47	93.617	35.6136	Gene: FBgn0031238, Misc. feature: contig 2L_1_6 1..50000(1)
2L mapping	255539	SNV	1	T	C	44	100	35.0682	Gene: FBgn0031238, Misc. feature: contig 2L_1_6 1..50000(1)
2L mapping	255952	SNV	1	G	A	30	100	35.1	Gene: FBgn0031238, Misc. feature: contig 2L_1_6 1..50000(1)
2L mapping	256133	SNV	1	A	G	37	100	32.5676	Gene: FBgn0031238, Misc. feature: contig 2L_1_6 1..50000(1)
2L mapping	256339	SNV	1	G	A	37	100	35.4595	Gene: FBgn0031238, Misc. feature: contig 2L_1_6 1..50000(1)
2L mapping	256993	SNV	1	G	A	39	100	35.0513	Gene: FBgn0031238, Misc. feature: contig 2L_1_6 1..50000(1)
2L mapping	257534	SNV	1	C	G	44	97.7273	33.4419	Gene: FBgn0031238, Misc. feature: contig 2L_1_6 1..50000(1)
2L mapping	257656	SNV	1	T	C	26	100	34.3846	Gene: FBgn0031238, Misc. feature: contig 2L_1_6 1..50000(1)
2L mapping	257880	SNV	1	G	C	34	100	32.7941	Gene: FBgn0031238, Misc. feature: contig 2L_1_6 1..50000(1)
2L mapping	258084	SNV	1	C	T	47	97.8723	32.913	Gene: FBgn0031238, Misc. feature: contig 2L_1_6 1..50000(1)
2L mapping	258215	SNV	1	T	G	40	100	34.9	Gene: FBgn0031238, Misc. feature: contig 2L_1_6 1..50000(1)
2L mapping	258379	SNV	1	G	A	34	100	32.8824	Gene: FBgn0031238, Misc. feature: contig 2L_1_6 1..50000(1)
2L mapping	258459	SNV	1	T	G	34	100	32.3824	Gene: FBgn0031238, Misc. feature: contig 2L_1_6 1..50000(1)
2L mapping	259021	SNV	1	T	A	27	70.3704	35.5789	Gene: FBgn0031238, Misc. feature: contig 2L_1_6 1..50000(1)
2L mapping	259032	Insertion	1	-	T	30	56.6667	27.4706	Gene: FBgn0031238, Misc. feature: contig 2L_1_6 1..50000(1)
2L mapping	259051	SNV	1	G	C	26	100	32.3846	Gene: FBgn0031238, Misc. feature: contig 2L_1_6 1..50000(1)
2L mapping	259065	Deletion	1	C	-	27	88.8889	33.5	Gene: FBgn0031238, Misc. feature: contig 2L_1_6 1..50000(1)
2L mapping	259067	SNV	1	T	A	27	88.8889	33.375	Gene: FBgn0031238, Misc. feature: contig 2L_1_6 1..50000(1)
2L mapping	259182	SNV	1	C	A	36	100	33.8056	Gene: FBgn0031238, Misc. feature: contig 2L_1_6 1..50000(1)
2L mapping	259295	SNV	1	A	T	40	97.5	35.6154	Gene: FBgn0031238, Misc. feature: contig 2L_1_6 1..50000(1)
2L mapping	259402	SNV	1	A	C	36	100	34.7778	Gene: FBgn0031238, Misc. feature: contig 2L_1_6 1..50000(1)
2L mapping	259407	SNV	1	A	G	36	100	34.3333	Gene: FBgn0031238, Misc. feature: contig 2L_1_6 1..50000(1)
2L mapping	259412	SNV	1	T	C	34	100	36.0588	Gene: FBgn0031238, Misc. feature: contig 2L_1_6 1..50000(1)
2L mapping	259492	Insertion	1	-	A	59	88.1356	34.8846	Gene: FBgn0031238, Misc. feature: contig 2L_1_6 1..50000(1)
2L mapping	259593	SNV	1	G	T	43	100	34.9302	Gene: FBgn0031238, Misc. feature: contig 2L_1_6 1..50000(1)
2L mapping	259613	SNV	1	C	A	41	97.561	36.7	Gene: FBgn0031238, Misc. feature: contig 2L_1_6 1..50000(1)
2L mapping	259754	SNV	1	A	G	46	100	33.913	Gene: FBgn0031238, Misc. feature: contig 2L_1_6 1..50000(1)
2L mapping	259839	Insertion	5	-	CTGGC	41	73.1707	33.28	Gene: FBgn0031238, Misc. feature: contig 2L_1_6 1..50000(1)
2L mapping	260081	SNV	1	G	T	40	100	35.375	Exon: Exon, Gene: FBgn0031238, Gene: FBgn0031239, Misc. feature: contig 2L_1_6 1..50000(1), mRNA: FBgn0031239
2L mapping	260111	Insertion	1	-	A	36	97.2222	34.1143	Exon: Exon, Gene: FBgn0031238, Gene: FBgn0031239, Misc. feature: contig 2L_1_6 1..50000(1), mRNA: FBgn0031239
2L mapping	260199	SNV	1	C	A	38	100	33.8684	Exon: Exon, Gene: FBgn0031238, Gene: FBgn0031239, Misc. feature: contig 2L_1_6 1..50000(1), mRNA: FBgn0031239
2L mapping	260353	Deletion	1	T	-	40	90	32.8611	Exon: Exon, Gene: FBgn0031238, Gene: FBgn0031239, Misc. feature: contig 2L_1_6 1..50000(1), mRNA: FBgn0031239
2L mapping	260488	SNV	1	A	T	34	100	35.8529	Exon: Exon, Gene: FBgn0031238, Gene: FBgn0031239, Misc. feature: contig 2L_1_6 1..50000(1), mRNA: FBgn0031239
2L mapping	260573	SNV	1	T	G	38	100	35.0263	Exon: Exon, Gene: FBgn0031238, Gene: FBgn0031239, Misc. feature: contig 2L_1_6 1..50000(1), mRNA: FBgn0031239
2L mapping	260726	SNV	1	A	T	50	100	34.7	Exon: Exon, Gene: FBgn0031238, Gene: FBgn0031239, Misc. feature: contig 2L_1_6 1..50000(1), mRNA: FBgn0031239
2L mapping	260915	SNV	1	A	G	42	100	34.6667	Exon: Exon, Gene: FBgn0031238, Gene: FBgn0031239, Misc. feature: contig 2L_1_6 1..50000(1), mRNA: FBgn0031239
2L mapping	261114	SNV	1	A	C	35	97.1429	34.3529	Exon: Exon, Gene: FBgn0031238, Gene: FBgn0031239, Misc. feature: contig 2L_1_6 1..50000(1), mRNA: FBgn0031239
2L mapping	261283	SNV	1	T	C	33	100	33.0303	Exon: Exon, Gene: FBgn0031238, Gene: FBgn0031239, Misc. feature: contig 2L_1_6 1..50000(1), mRNA: FBgn0031239
2L mapping	261332	SNV	1	A	C	20	45	27.5556	Exon: Exon, Gene: FBgn0031238, Gene: FBgn0031239, Misc. feature: contig 2L_1_6 1..50000(1), mRNA: FBgn0031239
2L mapping	261335	SNV	1	A	C	18	88.8889	33.625	Exon: Exon, Gene: FBgn0031238, Gene: FBgn0031239, Misc. feature: contig 2L_1_6 1..50000(1), mRNA: FBgn0031239
2L mapping	261358	SNV	1	G	A	26	100	33.5385	Exon: Exon, Gene: FBgn0031238, Gene: FBgn0031239, Misc. feature: contig 2L_1_6 1..50000(1), mRNA: FBgn0031239
2L mapping	261534	SNV	1	T	C	28	100	35.0357	Exon: Exon, Gene: FBgn0031238, Gene: FBgn0031239, Misc. feature: contig 2L_1_6 1..50000(1), mRNA: FBgn0031239
2L mapping	262133	SNV	1	T	A	33	100	35.6364	Exon: Exon, Gene: FBgn0031238, Gene: FBgn0031239, Misc. feature: contig 2L_1_6 1..50000(1), mRNA: FBgn0031239
2L mapping	262138	Insertion	3	-	AAT	33	66.6667	34.2727	Exon: Exon, Gene: FBgn0031238, Gene: FBgn0031239, Misc. feature: contig 2L_1_6 1..50000(1), mRNA: FBgn0031239
2L mapping	262139	SNV	1	A	T	33	66.6667	32.4091	Exon: Exon, Gene: FBgn0031238, Gene: FBgn0031239, Misc. feature: contig 2L_1_6 1..50000(1), mRNA: FBgn0031239
2L mapping	262249	SNV	1	A	T	36	100	35.75	Misc. RNA: FBgn0265150, Exon: Exon, Exon: Exon, Gene: FBgn0031238, Gene: FBgn0031239, Gene: FBgn0265150, Misc. feature: contig 2L_1_6 1..50000(1), mRNA: FBgn0031239
2L mapping	262257	SNV	1	T	G	36	100	33.5556	Misc. RNA: FBgn0265150, Exon: Exon, Exon: Exon, Gene: FBgn0031238, Gene: FBgn0031239, Gene: FBgn0265150, Misc. feature: contig 2L_1_6 1..50000(1), mRNA: FBgn0031239
2L mapping	262264	SNV	1	A	T	39	100	35.1538	Misc. RNA: FBgn0265150, Exon: Exon, Exon: Exon, Gene: FBgn0031238, Gene: FBgn0031239, Gene: FBgn0265150, Misc. feature: contig 2L_1_6 1..50000(1), mRNA: FBgn0031239
2L mapping	262402	SNV	1	A	C	40	100	33.425	Misc. RNA: FBgn0265150, Exon: Exon, Exon: Exon, Gene: FBgn0031238, Gene: FBgn0031239, Gene: FBgn0265150, Misc. feature: contig 2L_1_6 1..50000(1), mRNA: FBgn0031239
2L mapping	262660	Deletion	4	GACT	-	38	89.4737	35.2647	Misc. RNA: FBgn0265150, Exon: Exon, Exon: Exon, Gene: FBgn0031238, Gene: FBgn0031239, Gene: FBgn0265150, Misc. feature: contig 2L_1_6 1..50000(1), mRNA: FBgn0031239
2L mapping	262761	SNV	1	T	C	35	100	34.4571	Misc. RNA: FBgn0265150, Exon: Exon, Exon: Exon, Gene: FBgn0031238, Gene: FBgn0031239, Gene: FBgn0265150, Misc. feature: contig 2L_1_6 1..50000(1), mRNA: FBgn0031239
2L mapping	263051	Insertion	2	-	AA	48	97.9167	35.5426	Exon: Exon, Gene: FBgn0031238, Gene: FBgn0031239, Misc. feature: contig 2L_1_6 1..50000(1), mRNA: FBgn0031239
2L mapping	263148	SNV	1	A	G	37	100	33.027	Exon: Exon, Gene: FBgn0031238, Gene: FBgn0031239, Misc. feature: contig 2L_1_6 1..50000(1), mRNA: FBgn0031239
2L mapping	263171	SNV	1	G	C	39	100	33.9487	Exon: Exon, Gene: FBgn0031238, Gene: FBgn0031239, Misc. feature: contig 2L_1_6 1..50000(1), mRNA: FBgn0031239
2L mapping	263222	SNV	1	G	A	33	100	34.9394	Exon: Exon, Gene: FBgn0031238, Gene: FBgn0031239, Misc. feature: contig 2L_1_6 1..50000(1), mRNA: FBgn0031239
2L mapping	263238	SNV	1	T	A	34	100	35.1176	Exon: Exon, Gene: FBgn0031238, Gene: FBgn0031239, Misc. feature: contig 2L_1_6 1..50000(1), mRNA: FBgn0031239
2L mapping	263253	SNV	1	C	T	43	100	36.093	Exon: Exon, Gene: FBgn0031238, Gene: FBgn0031239, Misc. feature: contig 2L_1_6 1..50000(1), mRNA: FBgn0031239
2L mapping	263262	SNV	1	T	G	40	97.5	35.5385	Exon: Exon, Gene: FBgn0031238, Gene: FBgn0031239, Misc. feature: contig 2L_1_6 1..50000(1), mRNA: FBgn0031239
2L mapping	263266	SNV	1	T	C	43	97.6744	34.4524	Exon: Exon, Gene: FBgn0031238, Gene: FBgn0031239, Misc. feature: contig 2L_1_6 1..50000(1), mRNA: FBgn0031239
2L mapping	263273	SNV	1	C	T	38	97.3684	36.2703	Exon: Exon, Gene: FBgn0031238, Gene: FBgn0031239, Misc. feature: contig 2L_1_6 1..50000(1), mRNA: FBgn0031239
2L mapping	263328	SNV	1	T	G	41	97.561	35.675	Exon: Exon, Gene: FBgn0031238, Gene: FBgn0031239, Misc. feature: contig 2L_1_6 1..50000(1), mRNA: FBgn0031239
2L mapping	263341	SNV	1	T	C	26	100	35.7692	Exon: Exon, Gene: FBgn0031238, Gene: FBgn0031239, Misc. feature: contig 2L_1_6 1..50000(1), mRNA: FBgn0031239
2L mapping	263587	SNV	1	C	A	32	100	34.8125	Exon: Exon, Exon: Exon, Gene: FBgn0031238, Gene: FBgn0031239, Misc. feature: contig 2L_1_6 1..50000(1), mRNA: FBgn0031239, mRNA: FBgn0031239
2L mapping	264313	SNV	1	T	G	22	100	35.1364	CDS: FBgn0031239, CDS: FBgn0031239, Exon: Exon, Exon: Exon, Gene: FBgn0031238, Gene: FBgn0031239, Misc. feature: contig 2L_1_6 1..50000(1), mRNA: FBgn0031239, mRNA: FBgn0031239	FBpp0077801:c.[2376A>C]; FBpp0300572:c.[2376A>C]	FBpp0077801:p.[Lys792Asn]; FBpp0300572:p.[Lys792Asn]
2L mapping	264751	SNV	1	A	G	26	100	34.9231	CDS: FBgn0031239, CDS: FBgn0031239, Exon: Exon, Exon: Exon, Gene: FBgn0031238, Gene: FBgn0031239, Misc. feature: contig 2L_1_6 1..50000(1), mRNA: FBgn0031239, mRNA: FBgn0031239	FBpp0300572:c.[1938T>C]; FBpp0077801:c.[1938T>C]
2L mapping	265816	SNV	1	G	T	40	100	34.35	CDS: FBgn0031239, CDS: FBgn0031239, Exon: Exon, Exon: Exon, Gene: FBgn0031238, Gene: FBgn0031239, Misc. feature: contig 2L_1_6 1..50000(1), mRNA: FBgn0031239, mRNA: FBgn0031239	FBpp0077801:c.[873C>A]; FBpp0300572:c.[873C>A]
2L mapping	266472	SNV	1	T	C	37	100	34.8919	CDS: FBgn0031239, CDS: FBgn0031239, Exon: Exon, Exon: Exon, Gene: FBgn0031238, Gene: FBgn0031239, Misc. feature: contig 2L_1_6 1..50000(1), mRNA: FBgn0031239, mRNA: FBgn0031239	FBpp0077801:c.[217A>G]; FBpp0300572:c.[217A>G]	FBpp0077801:p.[Asn73Asp]; FBpp0300572:p.[Asn73Asp]
2L mapping	266595	SNV	1	C	T	46	100	35.1522	CDS: FBgn0031239, CDS: FBgn0031239, Exon: Exon, Exon: Exon, Gene: FBgn0031238, Gene: FBgn0031239, Misc. feature: contig 2L_1_6 1..50000(1), mRNA: FBgn0031239, mRNA: FBgn0031239	FBpp0077801:c.[94G>A]; FBpp0300572:c.[94G>A]	FBpp0077801:p.[Gly32Ser]; FBpp0300572:p.[Gly32Ser]
2L mapping	266668	SNV	1	T	C	39	100	34.3333	CDS: FBgn0031239, CDS: FBgn0031239, Exon: Exon, Exon: Exon, Gene: FBgn0031238, Gene: FBgn0031239, Misc. feature: contig 2L_1_6 1..50000(1), mRNA: FBgn0031239, mRNA: FBgn0031239	FBpp0300572:c.[21A>G]; FBpp0077801:c.[21A>G]
2L mapping	267097	Deletion	4	TCCG	-	26	65.3846	31.2941	Exon: Exon, Exon: Exon, Gene: FBgn0031238, Gene: FBgn0031239, Misc. feature: contig 2L_1_6 1..50000(1), mRNA: FBgn0031239, mRNA: FBgn0031239
2L mapping	267621	SNV	1	T	C	43	100	34.6744	Gene: FBgn0031238, Misc. feature: contig 2L_1_6 1..50000(1)
2L mapping	267658	SNV	1	T	C	42	100	34.119	Gene: FBgn0031238, Misc. feature: contig 2L_1_6 1..50000(1)
2L mapping	267731	SNV	1	T	A	50	100	35.1	Gene: FBgn0031238, Misc. feature: contig 2L_1_6 1..50000(1)
2L mapping	267804	SNV	1	G	A	47	97.8723	36.5217	Gene: FBgn0031238, Misc. feature: contig 2L_1_6 1..50000(1)
2L mapping	267992	SNV	1	G	A	51	100	33.6078	Gene: FBgn0031238, Misc. feature: contig 2L_1_6 1..50000(1)
2L mapping	268230	SNV	1	A	G	38	100	34.5	Gene: FBgn0031238, Misc. feature: contig 2L_1_6 1..50000(1)
2L mapping	268424	SNV	1	C	T	41	100	33.5854	Gene: FBgn0031238, Misc. feature: contig 2L_1_6 1..50000(1)
2L mapping	268430	SNV	1	A	G	44	100	34.8409	Gene: FBgn0031238, Misc. feature: contig 2L_1_6 1..50000(1)
2L mapping	268889	SNV	1	T	A	44	100	33.3636	Gene: FBgn0031238, Misc. feature: contig 2L_1_6 1..50000(1)
2L mapping	269487	SNV	1	T	C	37	100	32.8919	CDS: FBgn0031240, Exon: Exon, Gene: FBgn0031238, Gene: FBgn0031240, Misc. feature: contig 2L_1_6 1..50000(1), mRNA: FBgn0031240	FBpp0077786:c.228T>C
2L mapping	271430	SNV	1	C	G	49	100	35.5918	Exon: Exon, Gene: FBgn0031238, Gene: FBgn0031240, Misc. feature: contig 2L_1_6 1..50000(1), mRNA: FBgn0031240
2L mapping	271997	SNV	1	A	G	47	100	36.1277	CDS: FBgn0086912, Exon: Exon, Gene: FBgn0086912, Misc. feature: contig 2L_1_6 1..50000(1), mRNA: FBgn0086912	FBpp0077798:c.1590T>C
2L mapping	272868	SNV	1	A	G	31	100	34.2903	CDS: FBgn0086912, Exon: Exon, Gene: FBgn0086912, Misc. feature: contig 2L_1_6 1..50000(1), mRNA: FBgn0086912	FBpp0077798:c.767T>C	FBpp0077798:p.Val256Ala
2L mapping	272958	SNV	1	T	C	40	100	35.925	CDS: FBgn0086912, Exon: Exon, Gene: FBgn0086912, Misc. feature: contig 2L_1_6 1..50000(1), mRNA: FBgn0086912	FBpp0077798:c.677A>G	FBpp0077798:p.Lys226Arg
2L mapping	274249	SNV	1	T	G	42	100	34.1667	CDS: FBgn0086856, CDS: FBgn0086856, Exon: Exon, Exon: Exon, Gene: FBgn0086856, Misc. feature: contig 2L_1_6 1..50000(1), mRNA: FBgn0086856, mRNA: FBgn0086856	FBpp0077787:c.[264T>G]; FBpp0310342:c.[264T>G]
2L mapping	275743	SNV	1	T	G	38	100	35.6053	CDS: FBgn0086855, CDS: FBgn0086855, CDS: FBgn0086855, CDS: FBgn0086855, Exon: Exon, Gene: FBgn0086855, Misc. feature: contig 2L_1_6 1..50000(1), mRNA: FBgn0086855, mRNA: FBgn0086855, mRNA: FBgn0086855, mRNA: FBgn0086855	FBpp0290028:c.[1104A>C]; FBpp0303499:c.[1089A>C]; FBpp0303500:c.[1104A>C]; FBpp0303498:c.[1098A>C]
2L mapping	276598	SNV	1	A	G	35	100	36.0286	Gene: FBgn0086855, Misc. feature: contig 2L_1_6 1..50000(1)	FBpp0303499:c.[335-101T>C]; FBpp0303500:c.[350-101T>C]; FBpp0290028:c.[350-101T>C]; FBpp0303498:c.[344-101T>C]
2L mapping	276655	SNV	1	T	G	28	100	31.8571	Gene: FBgn0086855, Misc. feature: contig 2L_1_6 1..50000(1)	FBpp0303498:c.[343+84A>C]; FBpp0303500:c.[349+84A>C]; FBpp0290028:c.[349+84A>C]; FBpp0303499:c.[334+84A>C]
2L mapping	276931	SNV	1	T	C	28	100	35.9286	Gene: FBgn0086855, Misc. feature: contig 2L_1_6 1..50000(1)	FBpp0303499:c.[170-28A>G]; FBpp0303500:c.[184+28A>G]; FBpp0303498:c.[184+28A>G]; FBpp0290028:c.[184+28A>G]
2L mapping	277408	SNV	1	A	G	27	100	32.8148	Exon: Exon, Gene: FBgn0086855, Misc. feature: contig 2L_1_6 1..50000(1), mRNA: FBgn0086855
2L mapping	277649	Deletion	1	T	-	34	82.3529	31.7857	Exon: Exon, Exon: Exon, Gene: FBgn0086855, Gene: FBgn0003444, Misc. feature: contig 2L_1_6 1..50000(1), mRNA: FBgn0086855, mRNA: FBgn0003444
2L mapping	277662	Insertion	1	-	T	30	80	37	Exon: Exon, Exon: Exon, Gene: FBgn0086855, Gene: FBgn0003444, Misc. feature: contig 2L_1_6 1..50000(1), mRNA: FBgn0086855, mRNA: FBgn0003444
2L mapping	277776	SNV	1	A	T	47	100	36.1277	Exon: Exon, Exon: Exon, Gene: FBgn0086855, Gene: FBgn0003444, Misc. feature: contig 2L_1_6 1..50000(1), mRNA: FBgn0086855, mRNA: FBgn0003444
2L mapping	278355	SNV	1	A	T	39	100	33.1795	Gene: FBgn0003444, Misc. feature: contig 2L_1_6 1..50000(1)	FBpp0077788:c.432+32A>T
2L mapping	278514	SNV	1	T	A	43	97.6744	35.5238	Gene: FBgn0003444, Misc. feature: contig 2L_1_6 1..50000(1)	FBpp0077788:c.433-129T>A
2L mapping	279494	SNV	1	T	C	43	100	35.1628	CDS: FBgn0003444, Exon: Exon, Gene: FBgn0003444, Misc. feature: contig 2L_1_6 1..50000(1), mRNA: FBgn0003444	FBpp0077788:c.1224T>C
2L mapping	279674	SNV	1	C	T	39	100	34.7179	CDS: FBgn0003444, Exon: Exon, Gene: FBgn0003444, Misc. feature: contig 2L_1_6 1..50000(1), mRNA: FBgn0003444	FBpp0077788:c.1404C>T
2L mapping	279761	SNV	1	T	C	45	100	36.1778	CDS: FBgn0003444, Exon: Exon, Gene: FBgn0003444, Misc. feature: contig 2L_1_6 1..50000(1), mRNA: FBgn0003444	FBpp0077788:c.1491T>C
2L mapping	280090	SNV	1	C	A	40	100	35.625	Gene: FBgn0003444, Misc. feature: contig 2L_1_6 1..50000(1)	FBpp0077788:c.1707-20C>A
2L mapping	281271	SNV	1	C	T	32	100	35.9062	CDS: FBgn0003444, Exon: Exon, Gene: FBgn0003444, Misc. feature: contig 2L_1_6 1..50000(1), mRNA: FBgn0003444	FBpp0077788:c.2868C>T
2L mapping	281626	SNV	1	T	G	50	98	33.3878	Exon: Exon, Gene: FBgn0003444, Misc. feature: contig 2L_1_6 1..50000(1), mRNA: FBgn0003444
2L mapping	281709	SNV	1	C	T	43	100	35.3023	Exon: Exon, Exon: Exon, Gene: FBgn0003444, Gene: FBgn0031244, Misc. feature: contig 2L_1_6 1..50000(1), mRNA: FBgn0003444, mRNA: FBgn0031244
2L mapping	281866	Insertion	1	-	A	49	97.9592	35.7917	Exon: Exon, Exon: Exon, Gene: FBgn0003444, Gene: FBgn0031244, Misc. feature: contig 2L_1_6 1..50000(1), mRNA: FBgn0003444, mRNA: FBgn0031244
2L mapping	282130	SNV	1	A	C	35	100	35.2286	Exon: Exon, Exon: Exon, Exon: Exon, Gene: FBgn0003444, Gene: FBgn0031244, Misc. feature: contig 2L_1_6 1..50000(1), mRNA: FBgn0003444, mRNA: FBgn0031244, mRNA: FBgn0031244, mRNA: FBgn0031244
2L mapping	282152	SNV	1	C	A	38	100	35.0526	Exon: Exon, Exon: Exon, Exon: Exon, Gene: FBgn0003444, Gene: FBgn0031244, Misc. feature: contig 2L_1_6 1..50000(1), mRNA: FBgn0003444, mRNA: FBgn0031244, mRNA: FBgn0031244, mRNA: FBgn0031244
2L mapping	282523	SNV	1	C	T	32	100	33.0312	Gene: FBgn0031244, Misc. feature: contig 2L_1_6 1..50000(1)	FBpp0310345:c.[495-18G>A]; FBpp0310344:c.[495-18G>A]; FBpp0077796:c.[495-18G>A]
2L mapping	282561	SNV	1	A	T	49	100	34.7959	Gene: FBgn0031244, Misc. feature: contig 2L_1_6 1..50000(1)	FBpp0310345:c.[495-56T>A]; FBpp0077796:c.[495-56T>A]; FBpp0310344:c.[495-56T>A]
2L mapping	282823	SNV	1	C	T	51	98.0392	34.18	CDS: FBgn0031244, CDS: FBgn0031244, CDS: FBgn0031244, Exon: Exon, Exon: Exon, Gene: FBgn0031244, Misc. feature: contig 2L_1_6 1..50000(1), mRNA: FBgn0031244, mRNA: FBgn0031244, mRNA: FBgn0031244	FBpp0310345:c.[325G>A]; FBpp0077796:c.[325G>A]; FBpp0310344:c.[325G>A]	FBpp0310345:p.[Asp109Asn]; FBpp0077796:p.[Asp109Asn]; FBpp0310344:p.[Asp109Asn]
2L mapping	283514	Insertion	1	-	A	48	93.75	35.2889	Exon: Exon, Gene: FBgn0031245, Misc. feature: contig 2L_1_6 1..50000(1), mRNA: FBgn0031245, mRNA: FBgn0031245, mRNA: FBgn0031245
2L mapping	283594	SNV	1	T	C	46	97.8261	34.9778	Exon: Exon, Gene: FBgn0031245, Misc. feature: contig 2L_1_6 1..50000(1), mRNA: FBgn0031245, mRNA: FBgn0031245, mRNA: FBgn0031245
2L mapping	283681	SNV	1	T	G	50	100	33.34	Exon: Exon, Exon: Exon, Gene: FBgn0031245, Misc. feature: contig 2L_1_6 1..50000(1), mRNA: FBgn0031245, mRNA: FBgn0031245, mRNA: FBgn0031245, mRNA: FBgn0031245
2L mapping	283729	SNV	1	T	C	45	100	34.7333	Exon: Exon, Exon: Exon, Gene: FBgn0031245, Misc. feature: contig 2L_1_6 1..50000(1), mRNA: FBgn0031245, mRNA: FBgn0031245, mRNA: FBgn0031245, mRNA: FBgn0031245
2L mapping	283748	Insertion	4	-	TACA	40	65	36.5769	Exon: Exon, Exon: Exon, Gene: FBgn0031245, Misc. feature: contig 2L_1_6 1..50000(1), mRNA: FBgn0031245, mRNA: FBgn0031245, mRNA: FBgn0031245, mRNA: FBgn0031245
2L mapping	283762	SNV	1	A	T	37	100	35.9189	Exon: Exon, Exon: Exon, Gene: FBgn0031245, Misc. feature: contig 2L_1_6 1..50000(1), mRNA: FBgn0031245, mRNA: FBgn0031245, mRNA: FBgn0031245, mRNA: FBgn0031245
2L mapping	284283	SNV	1	C	T	48	100	35.5208	Gene: FBgn0031245, Misc. feature: contig 2L_1_6 1..50000(1)	FBpp0077794:c.[414-73G>A]; FBpp0310343:c.[420-73G>A]; FBpp0077795:c.[423-73G>A]; FBpp0111922:c.[420-73G>A]
2L mapping	284285	SNV	1	C	A	48	100	35.7083	Gene: FBgn0031245, Misc. feature: contig 2L_1_6 1..50000(1)	FBpp0077795:c.[423-75G>T]; FBpp0111922:c.[420-75G>T]; FBpp0077794:c.[414-75G>T]; FBpp0310343:c.[420-75G>T]
2L mapping	284303	SNV	1	T	C	49	100	34.5714	Gene: FBgn0031245, Misc. feature: contig 2L_1_6 1..50000(1)	FBpp0077794:c.[414-93A>G]; FBpp0310343:c.[420-93A>G]; FBpp0111922:c.[420-93A>G]; FBpp0077795:c.[423-93A>G]
2L mapping	284703	SNV	1	A	C	32	100	34.4688	Gene: FBgn0031245, Misc. feature: contig 2L_1_6 1..50000(1)	FBpp0077795:c.[422+45T>G]; FBpp0077794:c.[413+45T>G]; FBpp0111922:c.[419+45T>G]; FBpp0310343:c.[419+45T>G]
2L mapping	284882	SNV	1	A	C	45	100	34.6889	CDS: FBgn0031245, CDS: FBgn0031245, CDS: FBgn0031245, CDS: FBgn0031245, Exon: Exon, Gene: FBgn0031245, Misc. feature: contig 2L_1_6 1..50000(1), mRNA: FBgn0031245, mRNA: FBgn0031245, mRNA: FBgn0031245, mRNA: FBgn0031245	FBpp0077795:c.[288T>G]; FBpp0310343:c.[285T>G]; FBpp0077794:c.[279T>G]; FBpp0111922:c.[285T>G]
2L mapping	285011	SNV	1	A	T	40	100	34.75	Gene: FBgn0031245, Misc. feature: contig 2L_1_6 1..50000(1)	FBpp0077794:c.[193-43T>A]; FBpp0310343:c.[199-43T>A]; FBpp0077795:c.[202-43T>A]; FBpp0111922:c.[199-43T>A]
2L mapping	285557	SNV	1	A	G	46	100	34.413	CDS: FBgn0031245, Exon: Exon, Gene: FBgn0031245, Misc. feature: contig 2L_1_6 1..50000(1), mRNA: FBgn0031245	FBpp0077795:c.[77T>C]; FBpp0310343:c.[199-589T>C]; FBpp0077794:c.[193-589T>C]; FBpp0111922:c.[199-589T>C]	FBpp0077795:p.Val26Ala
2L mapping	285787	SNV	1	A	G	46	100	35.1087	Gene: FBgn0031245, Misc. feature: contig 2L_1_6 1..50000(1)	FBpp0077794:c.[192+520T>C]; FBpp0111922:c.[199-819T>C]; FBpp0310343:c.[199-819T>C]
2L mapping	285917	SNV	1	G	A	42	100	34.9762	Gene: FBgn0031245, Misc. feature: contig 2L_1_6 1..50000(1)	FBpp0310343:c.[199-949C>T]; FBpp0077794:c.[192+390C>T]; FBpp0111922:c.[199-949C>T]
2L mapping	286270	SNV	1	C	A	38	100	34.9737	Gene: FBgn0031245, Misc. feature: contig 2L_1_6 1..50000(1)	FBpp0111922:c.[199-1302G>T]; FBpp0310343:c.[199-1302G>T]; FBpp0077794:c.[192+37G>T]
2L mapping	286647	SNV	1	T	A	33	100	32.8485	Gene: FBgn0031245, Misc. feature: contig 2L_1_6 1..50000(1)	FBpp0310343:c.[199-1679A>T]; FBpp0111922:c.[199-1679A>T]
2L mapping	286991	SNV	1	T	A	46	100	34.7826	Gene: FBgn0031245, Misc. feature: contig 2L_1_6 1..50000(1)	FBpp0111922:c.[199-2023A>T]; FBpp0310343:c.[199-2023A>T]
2L mapping	287007	Insertion	5	-	CCCAG	44	88.6364	35.241	Gene: FBgn0031245, Misc. feature: contig 2L_1_6 1..50000(1)	FBpp0310343:c.[199-2039_199-2038insCTGGG]; FBpp0111922:c.[199-2039_199-2038insCTGGG]
2L mapping	287106	SNV	1	T	A	49	100	33.7551	Gene: FBgn0031245, Misc. feature: contig 2L_1_6 1..50000(1)	FBpp0310343:c.[199-2138A>T]; FBpp0111922:c.[199-2138A>T]
2L mapping	287226	SNV	1	T	A	54	100	35.0185	Gene: FBgn0031245, Misc. feature: contig 2L_1_6 1..50000(1)	FBpp0310343:c.[199-2258A>T]; FBpp0111922:c.[199-2258A>T]
2L mapping	289202	SNV	1	A	G	40	97.5	32.6154	Gene: FBgn0031245, Misc. feature: contig 2L_1_6 1..50000(1)	FBpp0111922:c.[198+1611T>C]; FBpp0310343:c.[198+1611T>C]
2L mapping	289798	SNV	1	A	C	56	100	34.5357	Gene: FBgn0031245, Misc. feature: contig 2L_1_6 1..50000(1)	FBpp0310343:c.[198+1015T>G]; FBpp0111922:c.[198+1015T>G]
2L mapping	289841	SNV	1	C	A	55	100	34.6545	Gene: FBgn0031245, Misc. feature: contig 2L_1_6 1..50000(1)	FBpp0111922:c.[198+972G>T]; FBpp0310343:c.[198+972G>T]
2L mapping	289874	SNV	1	G	T	56	98.2143	35.5818	Gene: FBgn0031245, Misc. feature: contig 2L_1_6 1..50000(1)	FBpp0310343:c.[198+939C>A]; FBpp0111922:c.[198+939C>A]
2L mapping	289952	SNV	1	G	C	48	100	34.6667	Gene: FBgn0031245, Misc. feature: contig 2L_1_6 1..50000(1)	FBpp0111922:c.[198+861C>G]; FBpp0310343:c.[198+861C>G]
2L mapping	290046	Deletion	10	TTTTTTCTTT	-	41	41.4634	35.4118	Gene: FBgn0031245, Misc. feature: contig 2L_1_6 1..50000(1)	FBpp0111922:c.[198+758_198+767delAAAGAAAAAA]; FBpp0310343:c.[198+758_198+767delAAAGAAAAAA]
2L mapping	290759	Deletion	8	TGTATCTC	-	26	46.1538	35.5	Gene: FBgn0031245, Misc. feature: contig 2L_1_6 1..50000(1)	FBpp0310343:c.[198+47_198+54delGAGATACA]; FBpp0111922:c.[198+47_198+54delGAGATACA]
2L mapping	291088	SNV	1	T	A	48	100	34.4583	Gene: FBgn0031245, Misc. feature: contig 2L_1_6 1..50000(1)
2L mapping	291209	Deletion	1	T	-	62	93.5484	33.5345	Gene: FBgn0031245, Misc. feature: contig 2L_1_6 1..50000(1)
2L mapping	292048	SNV	1	G	A	39	100	35.8718	Misc. feature: contig 2L_1_6 1..50000(1)
2L mapping	292130	SNV	1	T	A	35	97.1429	33.4118	Misc. feature: contig 2L_1_6 1..50000(1)
2L mapping	292255	SNV	1	G	A	49	97.9592	35.5	Misc. feature: contig 2L_1_6 1..50000(1)
2L mapping	292759	SNV	1	A	G	36	100	36.1389	CDS: FBgn0031247, Exon: Exon, Gene: FBgn0031247, Misc. feature: contig 2L_1_6 1..50000(1), mRNA: FBgn0031247	FBpp0077789:c.135A>G
2L mapping	292941	SNV	1	G	T	56	100	36.5357	CDS: FBgn0031247, Exon: Exon, Gene: FBgn0031247, Misc. feature: contig 2L_1_6 1..50000(1), mRNA: FBgn0031247	FBpp0077789:c.317G>T	FBpp0077789:p.Arg106Ile
2L mapping	293132	SNV	1	C	A	56	100	35.5893	Exon: Exon, Exon: Exon, Gene: FBgn0031247, Gene: FBgn0017457, Misc. feature: contig 2L_1_6 1..50000(1), mRNA: FBgn0031247, mRNA: FBgn0017457
2L mapping	293209	SNV	1	C	A	56	98.2143	35.6727	Exon: Exon, Exon: Exon, Gene: FBgn0031247, Gene: FBgn0017457, Misc. feature: contig 2L_1_6 1..50000(1), mRNA: FBgn0031247, mRNA: FBgn0017457
2L mapping	293279	SNV	1	G	A	44	100	35.2727	Exon: Exon, Gene: FBgn0017457, Misc. feature: contig 2L_1_6 1..50000(1), mRNA: FBgn0017457
2L mapping	293286	SNV	1	G	A	43	100	35.3488	Exon: Exon, Gene: FBgn0017457, Misc. feature: contig 2L_1_6 1..50000(1), mRNA: FBgn0017457
2L mapping	293446	Insertion	3	-	GGT	33	72.7273	34.6111	Exon: Exon, Exon: Exon, Gene: FBgn0017457, Misc. feature: contig 2L_1_6 1..50000(1), mRNA: FBgn0017457, mRNA: FBgn0017457
2L mapping	293760	SNV	1	G	A	24	100	34.4583	CDS: FBgn0017457, CDS: FBgn0017457, Exon: Exon, Exon: Exon, Gene: FBgn0017457, Misc. feature: contig 2L_1_6 1..50000(1), mRNA: FBgn0017457, mRNA: FBgn0017457	FBpp0305600:c.[657C>T]; FBpp0077792:c.[657C>T]
2L mapping	295534	SNV	1	G	A	44	97.7273	34.907	CDS: FBgn0024352, Exon: Exon, Gene: FBgn0024352, Misc. feature: contig 2L_1_6 1..50000(1), mRNA: FBgn0024352	FBpp0077790:c.198G>A
2L mapping	295546	SNV	1	C	T	49	100	34.8163	CDS: FBgn0024352, Exon: Exon, Gene: FBgn0024352, Misc. feature: contig 2L_1_6 1..50000(1), mRNA: FBgn0024352	FBpp0077790:c.210C>T
2L mapping	295741	SNV	1	A	G	35	100	34.9714	CDS: FBgn0024352, Exon: Exon, Gene: FBgn0024352, Misc. feature: contig 2L_1_6 1..50000(1), mRNA: FBgn0024352	FBpp0077790:c.330A>G
2L mapping	296890	SNV	1	G	A	45	100	34.6444	Gene: FBgn0024352, Misc. feature: contig 2L_1_6 1..50000(1)	FBpp0077790:c.1400+79G>A
2L mapping	297238	SNV	1	C	A	41	100	36.0244	Exon: Exon, Gene: FBgn0024352, Misc. feature: contig 2L_1_6 1..50000(1), mRNA: FBgn0024352
2L mapping	297568	SNV	1	T	C	43	100	35.186	Misc. feature: contig 2L_1_6 1..50000(1)
2L mapping	297577	SNV	1	T	C	41	100	35.2439	Misc. feature: contig 2L_1_6 1..50000(1)
2L mapping	297668	SNV	1	C	T	41	100	34.7805	Misc. feature: contig 2L_1_6 1..50000(1)
2L mapping	297724	SNV	1	A	G	23	100	34.8696	Misc. feature: contig 2L_1_6 1..50000(1)
2L mapping	297861	SNV	1	C	T	41	97.561	34.625	Misc. feature: contig 2L_1_6 1..50000(1)
2L mapping	297966	SNV	1	T	A	33	100	34.7879	Exon: Exon, Gene: FBgn0020622, Misc. feature: contig 2L_1_6 1..50000(1), mRNA: FBgn0020622, mRNA: FBgn0020622
2L mapping	298211	SNV	1	G	A	39	100	34.2308	Exon: Exon, Gene: FBgn0020622, Misc. feature: contig 2L_1_6 1..50000(1), mRNA: FBgn0020622, mRNA: FBgn0020622
2L mapping	298287	Deletion	3	GTC	-	29	86.2069	32.8	Exon: Exon, Gene: FBgn0020622, Misc. feature: contig 2L_1_6 1..50000(1), mRNA: FBgn0020622, mRNA: FBgn0020622
2L mapping	298677	SNV	1	C	T	41	100	36.2439	Gene: FBgn0020622, Misc. feature: contig 2L_1_6 1..50000(1)
2L mapping	298795	SNV	1	C	A	41	100	32.1951	Gene: FBgn0020622, Misc. feature: contig 2L_1_6 1..50000(1)
2L mapping	298883	SNV	1	A	T	35	100	34.9143	Gene: FBgn0020622, Misc. feature: contig 2L_1_6 1..50000(1)
2L mapping	298913	SNV	1	T	A	43	97.6744	35.1429	Gene: FBgn0020622, Misc. feature: contig 2L_1_6 1..50000(1)
2L mapping	299334	SNV	1	G	A	40	100	34.45	CDS: FBgn0020622, CDS: FBgn0020622, Exon: Exon, Gene: FBgn0020622, Misc. feature: contig 2L_1_6 1..50000(1), mRNA: FBgn0020622, mRNA: FBgn0020622	FBpp0303632:c.[273G>A]; FBpp0303635:c.[273G>A]
2L mapping	299382	SNV	1	G	T	45	100	33.2667	CDS: FBgn0020622, CDS: FBgn0020622, Exon: Exon, Gene: FBgn0020622, Misc. feature: contig 2L_1_6 1..50000(1), mRNA: FBgn0020622, mRNA: FBgn0020622	FBpp0303632:c.[321G>T]; FBpp0303635:c.[321G>T]
2L mapping	299415	SNV	1	A	C	41	100	34.8293	CDS: FBgn0020622, CDS: FBgn0020622, Exon: Exon, Gene: FBgn0020622, Misc. feature: contig 2L_1_6 1..50000(1), mRNA: FBgn0020622, mRNA: FBgn0020622	FBpp0303632:c.[354A>C]; FBpp0303635:c.[354A>C]
2L mapping	299935	SNV	1	A	T	40	100	34.45	Gene: FBgn0020622, Misc. feature: contig 2L_1_6 1..50000(1)	FBpp0303632:c.[857+17A>T]; FBpp0303635:c.[857+17A>T]
2L mapping	299940	SNV	1	T	A	43	100	35.7907	Gene: FBgn0020622, Misc. feature: contig 2L_1_6 1..50000(1)	FBpp0303632:c.[857+22T>A]; FBpp0303635:c.[857+22T>A]
2L mapping	300522	SNV	1	A	T	47	100	35.4681	Gene: FBgn0020622, Misc. feature: contig 2L_1_7 1..50000(1)	FBpp0303635:c.[857+604A>T]; FBpp0303632:c.[857+604A>T]
2L mapping	300732	Deletion	11	CCGATCTCTAT	-	33	42.4242	35	Gene: FBgn0020622, Misc. feature: contig 2L_1_7 1..50000(1)	FBpp0303632:c.[857+814_857+824delCCGATCTCTAT]; FBpp0303635:c.[857+814_857+824delCCGATCTCTAT]
2L mapping	301009	SNV	1	G	T	26	100	35.3462	Gene: FBgn0020622, Misc. feature: contig 2L_1_7 1..50000(1)	FBpp0303632:c.[858-1017G>T]; FBpp0303635:c.[858-1017G>T]
2L mapping	301191	SNV	1	T	C	36	100	35.2778	Gene: FBgn0020622, Misc. feature: contig 2L_1_7 1..50000(1)	FBpp0303632:c.[858-835T>C]; FBpp0303635:c.[858-835T>C]
2L mapping	301417	SNV	1	T	A	33	100	35.9394	Gene: FBgn0020622, Misc. feature: contig 2L_1_7 1..50000(1)	FBpp0303635:c.[858-609T>A]; FBpp0303632:c.[858-609T>A]
2L mapping	301738	SNV	1	T	C	38	100	35.5	Exon: Exon, Exon: Exon, Gene: FBgn0020622, Misc. feature: contig 2L_1_7 1..50000(1), mRNA: FBgn0020622, mRNA: FBgn0020622	FBpp0303632:c.[858-288T>C]; FBpp0303635:c.[858-288T>C]
2L mapping	302509	SNV	1	C	T	36	100	34.8333	CDS: FBgn0020622, CDS: FBgn0020622, CDS: FBgn0020622, CDS: FBgn0020622, Exon: Exon, Exon: Exon, Exon: Exon, Exon: Exon, Gene: FBgn0020622, Misc. feature: contig 2L_1_7 1..50000(1), mRNA: FBgn0020622, mRNA: FBgn0020622, mRNA: FBgn0020622, mRNA: FBgn0020622	FBpp0303634:c.[444C>T]; FBpp0303632:c.[1341C>T]; FBpp0303633:c.[444C>T]; FBpp0303635:c.[1341C>T]
2L mapping	303135	Deletion	2	TA	-	50	72	30.25	Exon: Exon, Exon: Exon, Exon: Exon, Exon: Exon, Gene: FBgn0020622, Misc. feature: contig 2L_1_7 1..50000(1), mRNA: FBgn0020622, mRNA: FBgn0020622, mRNA: FBgn0020622, mRNA: FBgn0020622
2L mapping	303439	SNV	1	G	A	56	98.2143	36.1636	Exon: Exon, Exon: Exon, Exon: Exon, Exon: Exon, Gene: FBgn0020622, Misc. feature: contig 2L_1_7 1..50000(1), mRNA: FBgn0020622, mRNA: FBgn0020622, mRNA: FBgn0020622, mRNA: FBgn0020622
2L mapping	305149	SNV	1	A	G	101	100	34.2574	Exon: Exon, Exon: Exon, Exon: Exon, Gene: FBgn0020622, Misc. feature: contig 2L_1_7 1..50000(1), mRNA: FBgn0020622, mRNA: FBgn0020622, mRNA: FBgn0020622
2L mapping	305626	SNV	1	C	T	94	100	34.883	Misc. feature: contig 2L_1_7 1..50000(1)
2L mapping	305826	SNV	1	C	G	94	98.9362	33.3333	Misc. feature: contig 2L_1_7 1..50000(1)
2L mapping	305847	SNV	1	C	G	92	100	34.25	Misc. feature: contig 2L_1_7 1..50000(1)
2L mapping	306131	Insertion	1	-	A	55	81.8182	35.4222	Exon: Exon, Gene: FBgn0004611, Misc. feature: contig 2L_1_7 1..50000(1), mRNA: FBgn0004611, mRNA: FBgn0004611, mRNA: FBgn0004611
2L mapping	306420	SNV	1	T	G	57	100	35.7544	Gene: FBgn0004611, Misc. feature: contig 2L_1_7 1..50000(1)
2L mapping	306546	SNV	1	G	A	80	100	35.8375	Gene: FBgn0004611, Misc. feature: contig 2L_1_7 1..50000(1)
2L mapping	306792	SNV	1	A	G	61	100	35.0492	Gene: FBgn0004611, Misc. feature: contig 2L_1_7 1..50000(1)
2L mapping	306874	Insertion	1	-	A	62	96.7742	36.3667	Gene: FBgn0004611, Misc. feature: contig 2L_1_7 1..50000(1)
2L mapping	307443	MNV	2	CC	AA	45	100	33.4778	Gene: FBgn0004611, Misc. feature: contig 2L_1_7 1..50000(1)
2L mapping	307471	SNV	1	T	C	32	100	32.9375	Gene: FBgn0004611, Misc. feature: contig 2L_1_7 1..50000(1)
2L mapping	308016	SNV	1	A	G	104	100	35.6442	Gene: FBgn0004611, Misc. feature: contig 2L_1_7 1..50000(1)
2L mapping	308108	SNV	1	T	C	74	98.6486	34.0548	Gene: FBgn0004611, Misc. feature: contig 2L_1_7 1..50000(1)
2L mapping	308188	SNV	1	G	C	85	100	35.5294	Gene: FBgn0004611, Misc. feature: contig 2L_1_7 1..50000(1)
2L mapping	308645	SNV	1	A	G	69	100	34.8261	Misc. RNA: FBgn0263872, Misc. RNA: FBgn0263872, Exon: Exon, Exon: Exon, Gene: FBgn0004611, Gene: FBgn0263872, Misc. feature: contig 2L_1_7 1..50000(1)
2L mapping	308744	Deletion	1	G	-	73	93.1507	34.5588	Misc. RNA: FBgn0263872, Misc. RNA: FBgn0263872, Exon: Exon, Exon: Exon, Gene: FBgn0004611, Gene: FBgn0263872, Misc. feature: contig 2L_1_7 1..50000(1)
2L mapping	308749	SNV	1	A	T	78	100	34.4615	Misc. RNA: FBgn0263872, Misc. RNA: FBgn0263872, Exon: Exon, Exon: Exon, Gene: FBgn0004611, Gene: FBgn0263872, Misc. feature: contig 2L_1_7 1..50000(1)
2L mapping	308885	SNV	1	A	T	73	98.6301	34.1806	Misc. RNA: FBgn0263872, Exon: Exon, Gene: FBgn0004611, Gene: FBgn0263872, Misc. feature: contig 2L_1_7 1..50000(1)
2L mapping	308899	Deletion	1	G	-	63	92.0635	31.8448	Misc. RNA: FBgn0263872, Exon: Exon, Gene: FBgn0004611, Gene: FBgn0263872, Misc. feature: contig 2L_1_7 1..50000(1)
2L mapping	309205	SNV	1	T	A	92	98.913	33.4286	Misc. RNA: FBgn0263872, Misc. RNA: FBgn0263872, Exon: Exon, Exon: Exon, Gene: FBgn0004611, Gene: FBgn0263872, Misc. feature: contig 2L_1_7 1..50000(1)
2L mapping	309372	SNV	1	C	G	80	100	35.0625	Gene: FBgn0004611, Misc. feature: contig 2L_1_7 1..50000(1)
2L mapping	309559	SNV	1	G	A	88	100	34.5568	Gene: FBgn0004611, Misc. feature: contig 2L_1_7 1..50000(1)
2L mapping	309981	MNV	2	AG	CA	68	98.5294	34.1119	Gene: FBgn0004611, Misc. feature: contig 2L_1_7 1..50000(1)
2L mapping	310715	SNV	1	T	C	79	100	34.4937	Gene: FBgn0004611, Misc. feature: contig 2L_1_7 1..50000(1)
2L mapping	310892	SNV	1	C	T	94	100	34.9255	Gene: FBgn0004611, Misc. feature: contig 2L_1_7 1..50000(1)
2L mapping	311856	SNV	1	A	C	68	100	34.7206	Gene: FBgn0004611, Misc. feature: contig 2L_1_7 1..50000(1)
2L mapping	312750	SNV	1	G	A	91	98.9011	35.2889	Gene: FBgn0004611, Misc. feature: contig 2L_1_7 1..50000(1)
2L mapping	312814	SNV	1	G	A	101	100	35.5644	Gene: FBgn0004611, Misc. feature: contig 2L_1_7 1..50000(1)
2L mapping	312971	SNV	1	T	C	101	100	35.4257	Gene: FBgn0004611, Misc. feature: contig 2L_1_7 1..50000(1)
2L mapping	313379	SNV	1	G	T	99	100	34.8081	Gene: FBgn0004611, Misc. feature: contig 2L_1_7 1..50000(1)
2L mapping	313947	Insertion	1	-	A	65	81.5385	36.8491	Gene: FBgn0004611, Misc. feature: contig 2L_1_7 1..50000(1)
2L mapping	314601	SNV	1	T	A	87	100	35.3448	Gene: FBgn0004611, Misc. feature: contig 2L_1_7 1..50000(1)
2L mapping	314638	SNV	1	C	T	90	100	35.1333	Gene: FBgn0004611, Misc. feature: contig 2L_1_7 1..50000(1)
2L mapping	315128	Deletion	8	CACACATA	-	56	41.0714	29.7826	Gene: FBgn0004611, Misc. feature: contig 2L_1_7 1..50000(1)
2L mapping	315174	Insertion	1	-	T	64	95.3125	33.8197	Gene: FBgn0004611, Misc. feature: contig 2L_1_7 1..50000(1)
2L mapping	315338	SNV	1	A	C	63	100	33.8254	Gene: FBgn0004611, Misc. feature: contig 2L_1_7 1..50000(1)
2L mapping	315787	SNV	1	A	T	37	100	36.5676	Gene: FBgn0004611, Misc. feature: contig 2L_1_7 1..50000(1)
2L mapping	315831	SNV	1	A	G	37	100	36.6216	Gene: FBgn0004611, Misc. feature: contig 2L_1_7 1..50000(1)
2L mapping	315930	SNV	1	T	G	34	97.0588	35.3333	Gene: FBgn0004611, Misc. feature: contig 2L_1_7 1..50000(1)
2L mapping	315958	SNV	1	T	C	29	100	34.2414	Gene: FBgn0004611, Misc. feature: contig 2L_1_7 1..50000(1)
2L mapping	315982	SNV	1	A	T	20	100	35.6	Gene: FBgn0004611, Misc. feature: contig 2L_1_7 1..50000(1)
2L mapping	316002	SNV	1	G	T	18	100	35.5556	Gene: FBgn0004611, Misc. feature: contig 2L_1_7 1..50000(1)
2L mapping	316005	SNV	1	G	C	18	100	35.2778	Gene: FBgn0004611, Misc. feature: contig 2L_1_7 1..50000(1)
2L mapping	316029	SNV	1	T	G	33	100	34.9697	Gene: FBgn0004611, Misc. feature: contig 2L_1_7 1..50000(1)
2L mapping	316113	Deletion	9	AACGAGAAA	-	30	60	33.8333	Gene: FBgn0004611, Misc. feature: contig 2L_1_7 1..50000(1)
2L mapping	316170	Deletion	1	C	-	39	92.3077	35.75	Gene: FBgn0004611, Misc. feature: contig 2L_1_7 1..50000(1)
2L mapping	316172	SNV	1	G	A	36	100	35.8889	Gene: FBgn0004611, Misc. feature: contig 2L_1_7 1..50000(1)
2L mapping	316452	SNV	1	G	T	26	92.3077	36.0833	Gene: FBgn0004611, Misc. feature: contig 2L_1_7 1..50000(1)
2L mapping	316664	SNV	1	A	C	45	97.7778	34.1818	Gene: FBgn0004611, Misc. feature: contig 2L_1_7 1..50000(1)
2L mapping	316722	SNV	1	A	T	42	100	35.6905	Gene: FBgn0004611, Misc. feature: contig 2L_1_7 1..50000(1)
2L mapping	316776	SNV	1	C	G	50	98	35.1633	Gene: FBgn0004611, Misc. feature: contig 2L_1_7 1..50000(1)
2L mapping	316780	SNV	1	C	G	47	97.8723	33.9565	Gene: FBgn0004611, Misc. feature: contig 2L_1_7 1..50000(1)
2L mapping	316783	SNV	1	A	C	46	97.8261	34.0444	Gene: FBgn0004611, Misc. feature: contig 2L_1_7 1..50000(1)
2L mapping	317163	Deletion	6	AATTGA	-	37	64.8649	36.0833	Gene: FBgn0004611, Misc. feature: contig 2L_1_7 1..50000(1)
2L mapping	317683	SNV	1	A	T	30	100	35.8333	Gene: FBgn0004611, Misc. feature: contig 2L_1_7 1..50000(1)
2L mapping	317827	SNV	1	C	T	47	100	34.9787	Exon: Exon, Gene: FBgn0004611, Misc. feature: contig 2L_1_7 1..50000(1), mRNA: FBgn0004611, mRNA: FBgn0004611, mRNA: FBgn0004611, mRNA: FBgn0004611, mRNA: FBgn0004611, mRNA: FBgn0004611
2L mapping	317836	SNV	1	T	C	49	100	34.3061	Exon: Exon, Gene: FBgn0004611, Misc. feature: contig 2L_1_7 1..50000(1), mRNA: FBgn0004611, mRNA: FBgn0004611, mRNA: FBgn0004611, mRNA: FBgn0004611, mRNA: FBgn0004611, mRNA: FBgn0004611
2L mapping	318262	SNV	1	G	T	49	91.8367	34.4667	Gene: FBgn0004611, Misc. feature: contig 2L_1_7 1..50000(1)	FBpp0303523:c.[93+142G>T]; FBpp0077710:c.[93+142G>T]; FBpp0089226:c.[93+142G>T]; FBpp0089225:c.[93+142G>T]; FBpp0077711:c.[93+142G>T]; FBpp0303524:c.[93+142G>T]
2L mapping	318347	Insertion	1	-	C	30	100	33.7667	Gene: FBgn0004611, Misc. feature: contig 2L_1_7 1..50000(1)	FBpp0089226:c.[93+226_93+227insC]; FBpp0077711:c.[93+226_93+227insC]; FBpp0303524:c.[93+226_93+227insC]; FBpp0089225:c.[93+226_93+227insC]; FBpp0077710:c.[93+226_93+227insC]; FBpp0303523:c.[93+226_93+227insC]
2L mapping	318348	MNV	4	CCCA	TTTG	30	100	34.2333	Gene: FBgn0004611, Misc. feature: contig 2L_1_7 1..50000(1)	FBpp0077710:c.[93+228_93+231delCCCAinsTTTG]; FBpp0077711:c.[93+228_93+231delCCCAinsTTTG]; FBpp0303524:c.[93+228_93+231delCCCAinsTTTG]; FBpp0303523:c.[93+228_93+231delCCCAinsTTTG]; FBpp0089226:c.[93+228_93+231delCCCAinsTTTG]; FBpp0089225:c.[93+228_93+231delCCCAinsTTTG]
2L mapping	318353	Deletion	1	T	-	30	100	32.5	Gene: FBgn0004611, Misc. feature: contig 2L_1_7 1..50000(1)	FBpp0303524:c.[93+233delT]; FBpp0303523:c.[93+233delT]; FBpp0089225:c.[93+233delT]; FBpp0089226:c.[93+233delT]; FBpp0077711:c.[93+233delT]; FBpp0077710:c.[93+233delT]
2L mapping	318356	Replacement	2	G	AC	30	100	34.3833	Gene: FBgn0004611, Misc. feature: contig 2L_1_7 1..50000(1)	FBpp0077710:c.[93+236delGinsAC]; FBpp0089226:c.[93+236delGinsAC]; FBpp0303524:c.[93+236delGinsAC]; FBpp0077711:c.[93+236delGinsAC]; FBpp0303523:c.[93+236delGinsAC]; FBpp0089225:c.[93+236delGinsAC]
2L mapping	318650	SNV	1	T	G	35	97.1429	35.1765	CDS: FBgn0031248, Exon: Exon, Gene: FBgn0004611, Gene: FBgn0031248, Misc. feature: contig 2L_1_7 1..50000(1), mRNA: FBgn0031248	FBpp0077758:c.[584A>C]; FBpp0303523:c.[93+530T>G]; FBpp0077711:c.[93+530T>G]; FBpp0077710:c.[93+530T>G]; FBpp0303524:c.[93+530T>G]; FBpp0089225:c.[93+530T>G]; FBpp0089226:c.[93+530T>G]	FBpp0077758:p.Asn195Thr
2L mapping	318859	SNV	1	T	C	43	100	35.7209	CDS: FBgn0031248, Exon: Exon, Gene: FBgn0004611, Gene: FBgn0031248, Misc. feature: contig 2L_1_7 1..50000(1), mRNA: FBgn0031248	FBpp0077758:c.[375A>G]; FBpp0089226:c.[93+739T>C]; FBpp0303524:c.[93+739T>C]; FBpp0303523:c.[93+739T>C]; FBpp0089225:c.[93+739T>C]; FBpp0077711:c.[93+739T>C]; FBpp0077710:c.[93+739T>C]
2L mapping	319257	SNV	1	T	A	53	98.1132	34.3077	Exon: Exon, Gene: FBgn0004611, Gene: FBgn0031248, Misc. feature: contig 2L_1_7 1..50000(1), mRNA: FBgn0031248	FBpp0077710:c.[93+1137T>A]; FBpp0077711:c.[93+1137T>A]; FBpp0089225:c.[93+1137T>A]; FBpp0089226:c.[93+1137T>A]; FBpp0303523:c.[93+1137T>A]; FBpp0303524:c.[93+1137T>A]
2L mapping	319449	SNV	1	A	C	45	97.7778	35.9545	Gene: FBgn0004611, Misc. feature: contig 2L_1_7 1..50000(1)	FBpp0077710:c.[93+1329A>C]; FBpp0303523:c.[93+1329A>C]; FBpp0089226:c.[93+1329A>C]; FBpp0089225:c.[93+1329A>C]; FBpp0077711:c.[93+1329A>C]; FBpp0303524:c.[93+1329A>C]
2L mapping	319469	SNV	1	C	A	50	100	35.98	Gene: FBgn0004611, Misc. feature: contig 2L_1_7 1..50000(1)	FBpp0077710:c.[93+1349C>A]; FBpp0089225:c.[93+1349C>A]; FBpp0303523:c.[93+1349C>A]; FBpp0303524:c.[93+1349C>A]; FBpp0089226:c.[93+1349C>A]; FBpp0077711:c.[93+1349C>A]
2L mapping	319580	SNV	1	G	A	44	100	34.1136	Gene: FBgn0004611, Misc. feature: contig 2L_1_7 1..50000(1)	FBpp0089226:c.[93+1460G>A]; FBpp0303523:c.[93+1460G>A]; FBpp0089225:c.[93+1460G>A]; FBpp0077711:c.[93+1460G>A]; FBpp0077710:c.[93+1460G>A]; FBpp0303524:c.[93+1460G>A]
2L mapping	319650	SNV	1	A	T	48	100	35.7083	Gene: FBgn0004611, Misc. feature: contig 2L_1_7 1..50000(1)	FBpp0089225:c.[93+1530A>T]; FBpp0077711:c.[93+1530A>T]; FBpp0303524:c.[93+1530A>T]; FBpp0077710:c.[93+1530A>T]; FBpp0303523:c.[93+1530A>T]; FBpp0089226:c.[93+1530A>T]
2L mapping	320229	SNV	1	C	G	51	100	35.6863	Gene: FBgn0004611, Misc. feature: contig 2L_1_7 1..50000(1)	FBpp0089225:c.[93+2109C>G]; FBpp0089226:c.[93+2109C>G]; FBpp0303523:c.[93+2109C>G]; FBpp0077710:c.[93+2109C>G]; FBpp0303524:c.[93+2109C>G]; FBpp0077711:c.[93+2109C>G]
2L mapping	321117	SNV	1	G	T	29	100	35.5862	CDS: FBgn0031249, Exon: Exon, Gene: FBgn0004611, Gene: FBgn0031249, Misc. feature: contig 2L_1_7 1..50000(1), mRNA: FBgn0031249	FBpp0077757:c.[105C>A]; FBpp0303524:c.[93+2997G>T]; FBpp0077710:c.[93+2997G>T]; FBpp0089226:c.[93+2997G>T]; FBpp0089225:c.[93+2997G>T]; FBpp0303523:c.[93+2997G>T]; FBpp0077711:c.[93+2997G>T]
2L mapping	321251	SNV	1	C	T	35	100	35.0571	Gene: FBgn0004611, Misc. feature: contig 2L_1_7 1..50000(1)	FBpp0303524:c.[93+3131C>T]; FBpp0077710:c.[93+3131C>T]; FBpp0089226:c.[93+3131C>T]; FBpp0303523:c.[93+3131C>T]; FBpp0077711:c.[93+3131C>T]; FBpp0089225:c.[93+3131C>T]
2L mapping	321394	SNV	1	T	C	40	100	31.8	Gene: FBgn0004611, Misc. feature: contig 2L_1_7 1..50000(1)	FBpp0077711:c.[93+3274T>C]; FBpp0089226:c.[93+3274T>C]; FBpp0303524:c.[93+3274T>C]; FBpp0077710:c.[93+3274T>C]; FBpp0089225:c.[93+3274T>C]; FBpp0303523:c.[93+3274T>C]
2L mapping	321801	SNV	1	T	G	34	100	33.9118	Gene: FBgn0004611, Misc. feature: contig 2L_1_7 1..50000(1)	FBpp0303523:c.[93+3681T>G]; FBpp0303524:c.[93+3681T>G]; FBpp0089225:c.[93+3681T>G]; FBpp0077710:c.[93+3681T>G]; FBpp0089226:c.[93+3681T>G]; FBpp0077711:c.[93+3681T>G]
2L mapping	321810	SNV	1	A	G	35	100	34.6571	Gene: FBgn0004611, Misc. feature: contig 2L_1_7 1..50000(1)	FBpp0089226:c.[93+3690A>G]; FBpp0077710:c.[93+3690A>G]; FBpp0089225:c.[93+3690A>G]; FBpp0077711:c.[93+3690A>G]; FBpp0303523:c.[93+3690A>G]; FBpp0303524:c.[93+3690A>G]
2L mapping	322370	SNV	1	C	T	34	100	34.2647	CDS: FBgn0053127, Exon: Exon, Gene: FBgn0004611, Gene: FBgn0053127, Misc. feature: contig 2L_1_7 1..50000(1), mRNA: FBgn0053127	FBpp0077710:c.[94-3308C>T]; FBpp0303523:c.[94-3308C>T]; FBpp0303524:c.[94-3308C>T]; FBpp0077711:c.[94-3308C>T]; FBpp0077712:c.[240C>T]; FBpp0089226:c.[94-3308C>T]; FBpp0089225:c.[94-3308C>T]
2L mapping	322751	SNV	1	C	G	42	100	36.2381	CDS: FBgn0053127, Exon: Exon, Gene: FBgn0004611, Gene: FBgn0053127, Misc. feature: contig 2L_1_7 1..50000(1), mRNA: FBgn0053127	FBpp0077711:c.[94-2927C>G]; FBpp0089226:c.[94-2927C>G]; FBpp0077712:c.[621C>G]; FBpp0077710:c.[94-2927C>G]; FBpp0303523:c.[94-2927C>G]; FBpp0303524:c.[94-2927C>G]; FBpp0089225:c.[94-2927C>G]
2L mapping	322793	SNV	1	A	T	44	100	35.9318	CDS: FBgn0053127, Exon: Exon, Gene: FBgn0004611, Gene: FBgn0053127, Misc. feature: contig 2L_1_7 1..50000(1), mRNA: FBgn0053127	FBpp0089226:c.[94-2885A>T]; FBpp0077711:c.[94-2885A>T]; FBpp0303523:c.[94-2885A>T]; FBpp0077712:c.[663A>T]; FBpp0077710:c.[94-2885A>T]; FBpp0089225:c.[94-2885A>T]; FBpp0303524:c.[94-2885A>T]
2L mapping	323052	SNV	1	C	A	52	98.0769	32.6863	Exon: Exon, Gene: FBgn0004611, Gene: FBgn0053127, Misc. feature: contig 2L_1_7 1..50000(1), mRNA: FBgn0053127	FBpp0089226:c.[94-2626C>A]; FBpp0089225:c.[94-2626C>A]; FBpp0303523:c.[94-2626C>A]; FBpp0303524:c.[94-2626C>A]; FBpp0077711:c.[94-2626C>A]; FBpp0077710:c.[94-2626C>A]
2L mapping	323155	SNV	1	A	G	45	100	34.2444	Gene: FBgn0004611, Misc. feature: contig 2L_1_7 1..50000(1)	FBpp0303524:c.[94-2523A>G]; FBpp0303523:c.[94-2523A>G]; FBpp0077710:c.[94-2523A>G]; FBpp0089226:c.[94-2523A>G]; FBpp0089225:c.[94-2523A>G]; FBpp0077711:c.[94-2523A>G]
2L mapping	323195	SNV	1	C	G	38	100	35.6316	Gene: FBgn0004611, Misc. feature: contig 2L_1_7 1..50000(1)	FBpp0303523:c.[94-2483C>G]; FBpp0089226:c.[94-2483C>G]; FBpp0089225:c.[94-2483C>G]; FBpp0077710:c.[94-2483C>G]; FBpp0077711:c.[94-2483C>G]; FBpp0303524:c.[94-2483C>G]
2L mapping	323345	SNV	1	T	A	43	100	35.3953	Gene: FBgn0004611, Misc. feature: contig 2L_1_7 1..50000(1)	FBpp0077710:c.[94-2333T>A]; FBpp0089225:c.[94-2333T>A]; FBpp0077711:c.[94-2333T>A]; FBpp0303523:c.[94-2333T>A]; FBpp0089226:c.[94-2333T>A]; FBpp0303524:c.[94-2333T>A]
2L mapping	323348	SNV	1	T	A	41	100	33.8293	Gene: FBgn0004611, Misc. feature: contig 2L_1_7 1..50000(1)	FBpp0089225:c.[94-2330T>A]; FBpp0077710:c.[94-2330T>A]; FBpp0303524:c.[94-2330T>A]; FBpp0089226:c.[94-2330T>A]; FBpp0077711:c.[94-2330T>A]; FBpp0303523:c.[94-2330T>A]
2L mapping	323351	Deletion	1	T	-	40	100	34.475	Gene: FBgn0004611, Misc. feature: contig 2L_1_7 1..50000(1)	FBpp0303524:c.[94-2327delT]; FBpp0089226:c.[94-2327delT]; FBpp0077710:c.[94-2327delT]; FBpp0089225:c.[94-2327delT]; FBpp0077711:c.[94-2327delT]; FBpp0303523:c.[94-2327delT]
2L mapping	323577	SNV	1	A	G	31	100	33.8387	Gene: FBgn0004611, Misc. feature: contig 2L_1_7 1..50000(1)	FBpp0303524:c.[94-2101A>G]; FBpp0089225:c.[94-2101A>G]; FBpp0303523:c.[94-2101A>G]; FBpp0077710:c.[94-2101A>G]; FBpp0077711:c.[94-2101A>G]; FBpp0089226:c.[94-2101A>G]
2L mapping	323605	SNV	1	A	G	37	100	35.2432	Gene: FBgn0004611, Misc. feature: contig 2L_1_7 1..50000(1)	FBpp0089226:c.[94-2073A>G]; FBpp0089225:c.[94-2073A>G]; FBpp0077711:c.[94-2073A>G]; FBpp0303523:c.[94-2073A>G]; FBpp0077710:c.[94-2073A>G]; FBpp0303524:c.[94-2073A>G]
2L mapping	323633	SNV	1	T	A	36	100	36.5	Gene: FBgn0004611, Misc. feature: contig 2L_1_7 1..50000(1)	FBpp0303523:c.[94-2045T>A]; FBpp0303524:c.[94-2045T>A]; FBpp0077710:c.[94-2045T>A]; FBpp0077711:c.[94-2045T>A]; FBpp0089226:c.[94-2045T>A]; FBpp0089225:c.[94-2045T>A]
2L mapping	323800	MNV	2	CC	TG	53	43.3962	35.1522	Gene: FBgn0004611, Misc. feature: contig 2L_1_7 1..50000(1)	FBpp0303523:c.[94-1878_94-1877delCCinsTG]; FBpp0089225:c.[94-1878_94-1877delCCinsTG]; FBpp0077711:c.[94-1878_94-1877delCCinsTG]; FBpp0089226:c.[94-1878_94-1877delCCinsTG]; FBpp0303524:c.[94-1878_94-1877delCCinsTG]; FBpp0077710:c.[94-1878_94-1877delCCinsTG]
2L mapping	323804	Insertion	1	-	G	24	100	33.9167	Gene: FBgn0004611, Misc. feature: contig 2L_1_7 1..50000(1)	FBpp0089226:c.[94-1875_94-1874insG]; FBpp0303523:c.[94-1875_94-1874insG]; FBpp0077711:c.[94-1875_94-1874insG]; FBpp0089225:c.[94-1875_94-1874insG]; FBpp0077710:c.[94-1875_94-1874insG]; FBpp0303524:c.[94-1875_94-1874insG]
2L mapping	323931	SNV	1	A	G	44	100	33.5455	Gene: FBgn0004611, Misc. feature: contig 2L_1_7 1..50000(1)	FBpp0089226:c.[94-1747A>G]; FBpp0077711:c.[94-1747A>G]; FBpp0303524:c.[94-1747A>G]; FBpp0303523:c.[94-1747A>G]; FBpp0077710:c.[94-1747A>G]; FBpp0089225:c.[94-1747A>G]
2L mapping	324007	SNV	1	A	C	47	100	35.0851	Gene: FBgn0004611, Misc. feature: contig 2L_1_7 1..50000(1)	FBpp0303524:c.[94-1671A>C]; FBpp0077710:c.[94-1671A>C]; FBpp0089225:c.[94-1671A>C]; FBpp0089226:c.[94-1671A>C]; FBpp0077711:c.[94-1671A>C]; FBpp0303523:c.[94-1671A>C]
2L mapping	324027	SNV	1	C	T	46	97.8261	35.0667	Gene: FBgn0004611, Misc. feature: contig 2L_1_7 1..50000(1)	FBpp0089225:c.[94-1651C>T]; FBpp0303524:c.[94-1651C>T]; FBpp0077710:c.[94-1651C>T]; FBpp0077711:c.[94-1651C>T]; FBpp0089226:c.[94-1651C>T]; FBpp0303523:c.[94-1651C>T]
2L mapping	324338	SNV	1	A	C	33	100	33.8182	Gene: FBgn0004611, Misc. feature: contig 2L_1_7 1..50000(1)	FBpp0077710:c.[94-1340A>C]; FBpp0077711:c.[94-1340A>C]; FBpp0303523:c.[94-1340A>C]; FBpp0089226:c.[94-1340A>C]; FBpp0303524:c.[94-1340A>C]; FBpp0089225:c.[94-1340A>C]
2L mapping	324567	Deletion	1	A	-	42	92.8571	34.3077	Gene: FBgn0004611, Misc. feature: contig 2L_1_7 1..50000(1)	FBpp0077710:c.[94-1111delA]; FBpp0077711:c.[94-1111delA]; FBpp0303523:c.[94-1111delA]; FBpp0089226:c.[94-1111delA]; FBpp0303524:c.[94-1111delA]; FBpp0089225:c.[94-1111delA]
2L mapping	324753	SNV	1	C	G	40	100	33.425	Gene: FBgn0004611, Misc. feature: contig 2L_1_7 1..50000(1)	FBpp0089226:c.[94-925C>G]; FBpp0089225:c.[94-925C>G]; FBpp0303523:c.[94-925C>G]; FBpp0077711:c.[94-925C>G]; FBpp0303524:c.[94-925C>G]; FBpp0077710:c.[94-925C>G]
2L mapping	324944	SNV	1	T	G	33	100	35.3939	Gene: FBgn0004611, Misc. feature: contig 2L_1_7 1..50000(1)	FBpp0089226:c.[94-734T>G]; FBpp0303523:c.[94-734T>G]; FBpp0077711:c.[94-734T>G]; FBpp0089225:c.[94-734T>G]; FBpp0303524:c.[94-734T>G]; FBpp0077710:c.[94-734T>G]
2L mapping	325087	SNV	1	T	C	33	100	35.5152	Gene: FBgn0004611, Misc. feature: contig 2L_1_7 1..50000(1)	FBpp0089226:c.[94-591T>C]; FBpp0077710:c.[94-591T>C]; FBpp0303523:c.[94-591T>C]; FBpp0089225:c.[94-591T>C]; FBpp0077711:c.[94-591T>C]; FBpp0303524:c.[94-591T>C]
2L mapping	325497	SNV	1	G	T	36	100	34.9722	Gene: FBgn0004611, Misc. feature: contig 2L_1_7 1..50000(1)	FBpp0303523:c.[94-181G>T]; FBpp0303524:c.[94-181G>T]; FBpp0077710:c.[94-181G>T]; FBpp0089225:c.[94-181G>T]; FBpp0089226:c.[94-181G>T]; FBpp0077711:c.[94-181G>T]
2L mapping	325884	SNV	1	G	A	33	100	33.697	CDS: FBgn0264086, Exon: Exon, Gene: FBgn0004611, Gene: FBgn0264086, Misc. feature: contig 2L_1_7 1..50000(1), mRNA: FBgn0264086	FBpp0077711:c.[240+60G>A]; FBpp0303523:c.[240+60G>A]; FBpp0303538:c.[1211C>T]; FBpp0303524:c.[240+60G>A]; FBpp0077710:c.[240+60G>A]; FBpp0089225:c.[240+60G>A]; FBpp0089226:c.[240+60G>A]	FBpp0303538:p.Ala404Val
2L mapping	326091	Deletion	2	GT	-	49	95.9184	34.8298	Gene: FBgn0004611, Gene: FBgn0264086, Misc. feature: contig 2L_1_7 1..50000(1)	FBpp0303523:c.[240+267_240+268delGT]; FBpp0303538:c.[1034-31_1034-30delAC]; FBpp0089226:c.[240+267_240+268delGT]; FBpp0077710:c.[240+267_240+268delGT]; FBpp0303524:c.[240+267_240+268delGT]; FBpp0077711:c.[240+267_240+268delGT]; FBpp0089225:c.[240+267_240+268delGT]
2L mapping	326244	SNV	1	C	A	38	100	34.5	Gene: FBgn0004611, Gene: FBgn0264086, Misc. feature: contig 2L_1_7 1..50000(1)	FBpp0077711:c.[240+420C>A]; FBpp0077710:c.[240+420C>A]; FBpp0303524:c.[240+420C>A]; FBpp0089225:c.[240+420C>A]; FBpp0303538:c.[1034-183G>T]; FBpp0089226:c.[240+420C>A]; FBpp0303523:c.[240+420C>A]
2L mapping	326280	SNV	1	T	C	56	100	35.1607	Gene: FBgn0004611, Gene: FBgn0264086, Misc. feature: contig 2L_1_7 1..50000(1)	FBpp0089226:c.[240+456T>C]; FBpp0303523:c.[240+456T>C]; FBpp0077710:c.[240+456T>C]; FBpp0303538:c.[1034-219A>G]; FBpp0089225:c.[240+456T>C]; FBpp0077711:c.[240+456T>C]; FBpp0303524:c.[240+456T>C]
2L mapping	326800	SNV	1	T	C	55	98.1818	35.8704	Gene: FBgn0004611, Gene: FBgn0264086, Misc. feature: contig 2L_1_7 1..50000(1)	FBpp0077711:c.[240+976T>C]; FBpp0089225:c.[240+976T>C]; FBpp0303524:c.[240+976T>C]; FBpp0089226:c.[240+976T>C]; FBpp0303523:c.[240+976T>C]; FBpp0303538:c.[1034-739A>G]; FBpp0077710:c.[240+976T>C]
2L mapping	326855	SNV	1	G	A	45	100	36.2222	Gene: FBgn0004611, Gene: FBgn0264086, Misc. feature: contig 2L_1_7 1..50000(1)	FBpp0077710:c.[240+1031G>A]; FBpp0089225:c.[240+1031G>A]; FBpp0303524:c.[240+1031G>A]; FBpp0303538:c.[1034-794C>T]; FBpp0089226:c.[240+1031G>A]; FBpp0077711:c.[240+1031G>A]; FBpp0303523:c.[240+1031G>A]
2L mapping	326979	SNV	1	A	G	38	100	36.2632	Gene: FBgn0004611, Gene: FBgn0264086, Misc. feature: contig 2L_1_7 1..50000(1)	FBpp0303538:c.[1034-918T>C]; FBpp0303523:c.[240+1155A>G]; FBpp0303524:c.[240+1155A>G]; FBpp0077710:c.[240+1155A>G]; FBpp0089226:c.[240+1155A>G]; FBpp0077711:c.[240+1155A>G]; FBpp0089225:c.[240+1155A>G]
2L mapping	327018	SNV	1	A	T	45	100	35.7333	Gene: FBgn0004611, Gene: FBgn0264086, Misc. feature: contig 2L_1_7 1..50000(1)	FBpp0077711:c.[240+1194A>T]; FBpp0303538:c.[1034-957T>A]; FBpp0089226:c.[240+1194A>T]; FBpp0303524:c.[240+1194A>T]; FBpp0303523:c.[240+1194A>T]; FBpp0089225:c.[240+1194A>T]; FBpp0077710:c.[240+1194A>T]
2L mapping	327023	SNV	1	G	A	44	100	34.4318	Gene: FBgn0004611, Gene: FBgn0264086, Misc. feature: contig 2L_1_7 1..50000(1)	FBpp0303538:c.[1034-962C>T]; FBpp0089226:c.[240+1199G>A]; FBpp0303524:c.[240+1199G>A]; FBpp0303523:c.[240+1199G>A]; FBpp0089225:c.[240+1199G>A]; FBpp0077710:c.[240+1199G>A]; FBpp0077711:c.[240+1199G>A]
2L mapping	327189	Deletion	6	CAACGA	-	38	73.6842	35.75	Gene: FBgn0004611, Gene: FBgn0264086, Misc. feature: contig 2L_1_7 1..50000(1)	FBpp0303523:c.[240+1365_240+1370delCAACGA]; FBpp0077710:c.[240+1365_240+1370delCAACGA]; FBpp0077711:c.[240+1365_240+1370delCAACGA]; FBpp0303524:c.[240+1365_240+1370delCAACGA]; FBpp0089226:c.[240+1365_240+1370delCAACGA]; FBpp0089225:c.[240+1365_240+1370delCAACGA]; FBpp0303538:c.[1034-1133_1034-1128delTCGTTG]
2L mapping	327204	SNV	1	A	C	40	100	35.7	Gene: FBgn0004611, Gene: FBgn0264086, Misc. feature: contig 2L_1_7 1..50000(1)	FBpp0303524:c.[240+1380A>C]; FBpp0303538:c.[1034-1143T>G]; FBpp0303523:c.[240+1380A>C]; FBpp0089225:c.[240+1380A>C]; FBpp0089226:c.[240+1380A>C]; FBpp0077710:c.[240+1380A>C]; FBpp0077711:c.[240+1380A>C]
2L mapping	327276	SNV	1	T	A	45	100	35.7111	Gene: FBgn0004611, Gene: FBgn0264086, Misc. feature: contig 2L_1_7 1..50000(1)	FBpp0303523:c.[240+1452T>A]; FBpp0089226:c.[240+1452T>A]; FBpp0303524:c.[240+1452T>A]; FBpp0089225:c.[240+1452T>A]; FBpp0077711:c.[240+1452T>A]; FBpp0303538:c.[1034-1215A>T]; FBpp0077710:c.[240+1452T>A]
2L mapping	327625	SNV	1	A	G	32	100	34.5938	CDS: FBgn0264086, Exon: Exon, Gene: FBgn0004611, Gene: FBgn0264086, Misc. feature: contig 2L_1_7 1..50000(1), mRNA: FBgn0264086	FBpp0303539:c.[1998T>C]; FBpp0303538:c.[1033+968T>C]; FBpp0089225:c.[240+1801A>G]; FBpp0089226:c.[240+1801A>G]; FBpp0077711:c.[240+1801A>G]; FBpp0303523:c.[240+1801A>G]; FBpp0303524:c.[240+1801A>G]; FBpp0077710:c.[240+1801A>G]
2L mapping	328247	SNV	1	T	C	43	100	35.3256	CDS: FBgn0264086, Exon: Exon, Gene: FBgn0004611, Gene: FBgn0264086, Misc. feature: contig 2L_1_7 1..50000(1), mRNA: FBgn0264086	FBpp0089226:c.[240+2423T>C]; FBpp0089225:c.[240+2423T>C]; FBpp0077710:c.[240+2423T>C]; FBpp0303524:c.[240+2423T>C]; FBpp0303539:c.[1376A>G]; FBpp0077711:c.[240+2423T>C]; FBpp0303538:c.[1033+346A>G]; FBpp0303523:c.[240+2423T>C]	FBpp0303539:p.Lys459Arg
2L mapping	328341	SNV	1	T	C	26	96.1538	33.76	CDS: FBgn0264086, Exon: Exon, Gene: FBgn0004611, Gene: FBgn0264086, Misc. feature: contig 2L_1_7 1..50000(1), mRNA: FBgn0264086	FBpp0303538:c.[1033+252A>G]; FBpp0303539:c.[1282A>G]; FBpp0077710:c.[240+2517T>C]; FBpp0303524:c.[240+2517T>C]; FBpp0089226:c.[240+2517T>C]; FBpp0089225:c.[240+2517T>C]; FBpp0077711:c.[240+2517T>C]; FBpp0303523:c.[240+2517T>C]	FBpp0303539:p.Lys428Glu
2L mapping	328345	Deletion	6	TTCCCC	-	26	76.9231	35	CDS: FBgn0264086, Exon: Exon, Gene: FBgn0004611, Gene: FBgn0264086, Misc. feature: contig 2L_1_7 1..50000(1), mRNA: FBgn0264086	FBpp0077711:c.[240+2521_240+2526delTTCCCC]; FBpp0303539:c.[1273_1278delGGGGAA]; FBpp0303538:c.[1033+243_1033+248delGGGGAA]; FBpp0077710:c.[240+2521_240+2526delTTCCCC]; FBpp0303523:c.[240+2521_240+2526delTTCCCC]; FBpp0089226:c.[240+2521_240+2526delTTCCCC]; FBpp0303524:c.[240+2521_240+2526delTTCCCC]; FBpp0089225:c.[240+2521_240+2526delTTCCCC]	FBpp0303539:p.Gly425_Glu426del
2L mapping	329494	SNV	1	A	G	40	100	34	CDS: FBgn0264086, CDS: FBgn0264086, Exon: Exon, Exon: Exon, Gene: FBgn0004611, Gene: FBgn0264086, Misc. feature: contig 2L_1_7 1..50000(1), mRNA: FBgn0264086, mRNA: FBgn0264086	FBpp0303523:c.[240+3670A>G]; FBpp0089225:c.[240+3670A>G]; FBpp0303539:c.[129T>C]; FBpp0303524:c.[240+3670A>G]; FBpp0303538:c.[132T>C]; FBpp0077710:c.[240+3670A>G]; FBpp0077711:c.[240+3670A>G]; FBpp0089226:c.[240+3670A>G]
2L mapping	329551	SNV	1	A	T	41	100	34.8537	CDS: FBgn0264086, CDS: FBgn0264086, Exon: Exon, Exon: Exon, Gene: FBgn0004611, Gene: FBgn0264086, Misc. feature: contig 2L_1_7 1..50000(1), mRNA: FBgn0264086, mRNA: FBgn0264086	FBpp0089225:c.[240+3727A>T]; FBpp0303523:c.[240+3727A>T]; FBpp0303539:c.[72T>A]; FBpp0089226:c.[240+3727A>T]; FBpp0303524:c.[240+3727A>T]; FBpp0077711:c.[240+3727A>T]; FBpp0077710:c.[240+3727A>T]; FBpp0303538:c.[75T>A]
2L mapping	329590	SNV	1	G	A	32	100	35.0625	CDS: FBgn0264086, CDS: FBgn0264086, Exon: Exon, Exon: Exon, Gene: FBgn0004611, Gene: FBgn0264086, Misc. feature: contig 2L_1_7 1..50000(1), mRNA: FBgn0264086, mRNA: FBgn0264086	FBpp0089226:c.[240+3766G>A]; FBpp0303523:c.[240+3766G>A]; FBpp0303539:c.[33C>T]; FBpp0077710:c.[240+3766G>A]; FBpp0089225:c.[240+3766G>A]; FBpp0077711:c.[240+3766G>A]; FBpp0303524:c.[240+3766G>A]; FBpp0303538:c.[36C>T]
2L mapping	329600	SNV	1	G	T	30	100	35.5333	CDS: FBgn0264086, CDS: FBgn0264086, Exon: Exon, Exon: Exon, Gene: FBgn0004611, Gene: FBgn0264086, Misc. feature: contig 2L_1_7 1..50000(1), mRNA: FBgn0264086, mRNA: FBgn0264086	FBpp0089226:c.[240+3776G>T]; FBpp0303538:c.[26C>A]; FBpp0303539:c.[23C>A]; FBpp0303523:c.[240+3776G>T]; FBpp0077711:c.[240+3776G>T]; FBpp0303524:c.[240+3776G>T]; FBpp0089225:c.[240+3776G>T]; FBpp0077710:c.[240+3776G>T]	FBpp0303538:p.[Pro9His]; FBpp0303539:p.[Pro8His]
2L mapping	329736	Insertion	2	-	TT	47	65.9574	36.5484	Exon: Exon, Exon: Exon, Gene: FBgn0004611, Gene: FBgn0264086, Misc. feature: contig 2L_1_7 1..50000(1), mRNA: FBgn0264086, mRNA: FBgn0264086	FBpp0077711:c.[240+3911_240+3912insTT]; FBpp0303523:c.[240+3911_240+3912insTT]; FBpp0303524:c.[240+3911_240+3912insTT]; FBpp0089225:c.[240+3911_240+3912insTT]; FBpp0077710:c.[240+3911_240+3912insTT]; FBpp0089226:c.[240+3911_240+3912insTT]
2L mapping	329809	SNV	1	C	T	35	100	34.6286	Gene: FBgn0004611, Misc. feature: contig 2L_1_7 1..50000(1)	FBpp0089226:c.[240+3985C>T]; FBpp0089225:c.[240+3985C>T]; FBpp0303524:c.[240+3985C>T]; FBpp0077711:c.[240+3985C>T]; FBpp0077710:c.[240+3985C>T]; FBpp0303523:c.[240+3985C>T]
2L mapping	329818	SNV	1	T	G	54	50	35.2593	Gene: FBgn0004611, Misc. feature: contig 2L_1_7 1..50000(1)	FBpp0077711:c.[240+3994T>G]; FBpp0303524:c.[240+3994T>G]; FBpp0077710:c.[240+3994T>G]; FBpp0089225:c.[240+3994T>G]; FBpp0303523:c.[240+3994T>G]; FBpp0089226:c.[240+3994T>G]
2L mapping	329820	SNV	1	G	A	55	49.0909	36.037	Gene: FBgn0004611, Misc. feature: contig 2L_1_7 1..50000(1)	FBpp0089225:c.[240+3996G>A]; FBpp0077710:c.[240+3996G>A]; FBpp0303524:c.[240+3996G>A]; FBpp0089226:c.[240+3996G>A]; FBpp0303523:c.[240+3996G>A]; FBpp0077711:c.[240+3996G>A]
2L mapping	329839	SNV	1	A	C	35	100	34.0857	Gene: FBgn0004611, Misc. feature: contig 2L_1_7 1..50000(1)	FBpp0077711:c.[240+4015A>C]; FBpp0089226:c.[240+4015A>C]; FBpp0077710:c.[240+4015A>C]; FBpp0303524:c.[240+4015A>C]; FBpp0089225:c.[240+4015A>C]; FBpp0303523:c.[240+4015A>C]
2L mapping	329858	SNV	1	A	C	41	100	35.9512	Gene: FBgn0004611, Misc. feature: contig 2L_1_7 1..50000(1)	FBpp0089225:c.[240+4034A>C]; FBpp0303523:c.[240+4034A>C]; FBpp0089226:c.[240+4034A>C]; FBpp0077711:c.[240+4034A>C]; FBpp0303524:c.[240+4034A>C]; FBpp0077710:c.[240+4034A>C]
2L mapping	329941	SNV	1	T	C	43	100	32.3488	Exon: Exon, Gene: FBgn0004611, Gene: FBgn0051921, Misc. feature: contig 2L_1_7 1..50000(1), mRNA: FBgn0051921	FBpp0303523:c.[240+4117T>C]; FBpp0077711:c.[240+4117T>C]; FBpp0303524:c.[240+4117T>C]; FBpp0077710:c.[240+4117T>C]; FBpp0089225:c.[240+4117T>C]; FBpp0089226:c.[240+4117T>C]
2L mapping	330215	SNV	1	T	C	46	100	34.4348	CDS: FBgn0051921, Exon: Exon, Gene: FBgn0004611, Gene: FBgn0051921, Misc. feature: contig 2L_1_7 1..50000(1), mRNA: FBgn0051921	FBpp0077755:c.[1918A>G]; FBpp0303523:c.[241-3905T>C]; FBpp0077710:c.[241-3905T>C]; FBpp0303524:c.[241-3905T>C]; FBpp0089226:c.[241-3905T>C]; FBpp0089225:c.[241-3905T>C]; FBpp0077711:c.[241-3905T>C]	FBpp0077755:p.Ser640Gly
2L mapping	330228	SNV	1	G	A	42	97.619	32.561	CDS: FBgn0051921, Exon: Exon, Gene: FBgn0004611, Gene: FBgn0051921, Misc. feature: contig 2L_1_7 1..50000(1), mRNA: FBgn0051921	FBpp0077711:c.[241-3892G>A]; FBpp0089226:c.[241-3892G>A]; FBpp0303523:c.[241-3892G>A]; FBpp0303524:c.[241-3892G>A]; FBpp0077710:c.[241-3892G>A]; FBpp0089225:c.[241-3892G>A]; FBpp0077755:c.[1905C>T]
2L mapping	330803	SNV	1	T	C	40	97.5	34.2308	CDS: FBgn0051921, Exon: Exon, Gene: FBgn0004611, Gene: FBgn0051921, Misc. feature: contig 2L_1_7 1..50000(1), mRNA: FBgn0051921	FBpp0303524:c.[241-3317T>C]; FBpp0089225:c.[241-3317T>C]; FBpp0089226:c.[241-3317T>C]; FBpp0303523:c.[241-3317T>C]; FBpp0077755:c.[1330A>G]; FBpp0077710:c.[241-3317T>C]; FBpp0077711:c.[241-3317T>C]	FBpp0077755:p.Ser444Gly
2L mapping	330853	SNV	1	T	C	36	97.2222	33.7143	CDS: FBgn0051921, Exon: Exon, Gene: FBgn0004611, Gene: FBgn0051921, Misc. feature: contig 2L_1_7 1..50000(1), mRNA: FBgn0051921	FBpp0077755:c.[1280A>G]; FBpp0089226:c.[241-3267T>C]; FBpp0303524:c.[241-3267T>C]; FBpp0303523:c.[241-3267T>C]; FBpp0077710:c.[241-3267T>C]; FBpp0089225:c.[241-3267T>C]; FBpp0077711:c.[241-3267T>C]	FBpp0077755:p.Lys427Arg
2L mapping	330906	SNV	1	C	A	35	100	31.6857	CDS: FBgn0051921, Exon: Exon, Gene: FBgn0004611, Gene: FBgn0051921, Misc. feature: contig 2L_1_7 1..50000(1), mRNA: FBgn0051921	FBpp0089226:c.[241-3214C>A]; FBpp0303523:c.[241-3214C>A]; FBpp0077710:c.[241-3214C>A]; FBpp0089225:c.[241-3214C>A]; FBpp0077711:c.[241-3214C>A]; FBpp0077755:c.[1227G>T]; FBpp0303524:c.[241-3214C>A]	FBpp0077755:p.Lys409Asn
2L mapping	331027	SNV	1	T	C	33	96.9697	34.6562	CDS: FBgn0051921, Exon: Exon, Gene: FBgn0004611, Gene: FBgn0051921, Misc. feature: contig 2L_1_7 1..50000(1), mRNA: FBgn0051921	FBpp0303524:c.[241-3093T>C]; FBpp0089225:c.[241-3093T>C]; FBpp0077711:c.[241-3093T>C]; FBpp0077755:c.[1106A>G]; FBpp0303523:c.[241-3093T>C]; FBpp0089226:c.[241-3093T>C]; FBpp0077710:c.[241-3093T>C]	FBpp0077755:p.Glu369Gly
2L mapping	331747	SNV	1	G	C	25	100	33.76	CDS: FBgn0051921, Exon: Exon, Gene: FBgn0004611, Gene: FBgn0051921, Misc. feature: contig 2L_1_7 1..50000(1), mRNA: FBgn0051921	FBpp0303523:c.[241-2373G>C]; FBpp0089225:c.[241-2373G>C]; FBpp0089226:c.[241-2373G>C]; FBpp0077755:c.[386C>G]; FBpp0077710:c.[241-2373G>C]; FBpp0077711:c.[241-2373G>C]; FBpp0303524:c.[241-2373G>C]	FBpp0077755:p.Thr129Ser
2L mapping	332208	SNV	1	A	C	24	100	32.5	Exon: Exon, Gene: FBgn0004611, Gene: FBgn0051921, Misc. feature: contig 2L_1_7 1..50000(1), mRNA: FBgn0051921	FBpp0303524:c.[241-1912A>C]; FBpp0303523:c.[241-1912A>C]; FBpp0077710:c.[241-1912A>C]; FBpp0089226:c.[241-1912A>C]; FBpp0089225:c.[241-1912A>C]; FBpp0077711:c.[241-1912A>C]
2L mapping	332273	SNV	1	T	A	40	100	35.65	Exon: Exon, Gene: FBgn0004611, Gene: FBgn0051921, Misc. feature: contig 2L_1_7 1..50000(1), mRNA: FBgn0051921	FBpp0089226:c.[241-1847T>A]; FBpp0077711:c.[241-1847T>A]; FBpp0077710:c.[241-1847T>A]; FBpp0303524:c.[241-1847T>A]; FBpp0089225:c.[241-1847T>A]; FBpp0303523:c.[241-1847T>A]
2L mapping	332361	SNV	1	T	C	42	100	35.0238	Gene: FBgn0004611, Misc. feature: contig 2L_1_7 1..50000(1)	FBpp0089226:c.[241-1759T>C]; FBpp0077711:c.[241-1759T>C]; FBpp0089225:c.[241-1759T>C]; FBpp0303524:c.[241-1759T>C]; FBpp0303523:c.[241-1759T>C]; FBpp0077710:c.[241-1759T>C]
2L mapping	332381	SNV	1	C	T	40	97.5	35.1538	Gene: FBgn0004611, Misc. feature: contig 2L_1_7 1..50000(1)	FBpp0303524:c.[241-1739C>T]; FBpp0089225:c.[241-1739C>T]; FBpp0089226:c.[241-1739C>T]; FBpp0077710:c.[241-1739C>T]; FBpp0077711:c.[241-1739C>T]; FBpp0303523:c.[241-1739C>T]
2L mapping	332515	SNV	1	G	A	26	100	34.8462	Gene: FBgn0004611, Misc. feature: contig 2L_1_7 1..50000(1)	FBpp0077710:c.[241-1605G>A]; FBpp0303523:c.[241-1605G>A]; FBpp0089225:c.[241-1605G>A]; FBpp0303524:c.[241-1605G>A]; FBpp0089226:c.[241-1605G>A]; FBpp0077711:c.[241-1605G>A]
2L mapping	332907	SNV	1	G	A	22	95.4545	34.7619	Gene: FBgn0004611, Misc. feature: contig 2L_1_7 1..50000(1)	FBpp0089225:c.[241-1213G>A]; FBpp0303524:c.[241-1213G>A]; FBpp0089226:c.[241-1213G>A]; FBpp0303523:c.[241-1213G>A]; FBpp0077710:c.[241-1213G>A]; FBpp0077711:c.[241-1213G>A]
2L mapping	332917	Deletion	1	C	-	23	95.6522	33.2727	Gene: FBgn0004611, Misc. feature: contig 2L_1_7 1..50000(1)	FBpp0077710:c.[241-1203delC]; FBpp0303523:c.[241-1203delC]; FBpp0089225:c.[241-1203delC]; FBpp0089226:c.[241-1203delC]; FBpp0303524:c.[241-1203delC]; FBpp0077711:c.[241-1203delC]
2L mapping	333077	SNV	1	A	C	24	100	35.25	Gene: FBgn0004611, Misc. feature: contig 2L_1_7 1..50000(1)	FBpp0089226:c.[241-1043A>C]; FBpp0077710:c.[241-1043A>C]; FBpp0303523:c.[241-1043A>C]; FBpp0303524:c.[241-1043A>C]; FBpp0089225:c.[241-1043A>C]; FBpp0077711:c.[241-1043A>C]
2L mapping	333346	SNV	1	T	C	33	100	33.9394	Gene: FBgn0004611, Misc. feature: contig 2L_1_7 1..50000(1)	FBpp0089225:c.[241-774T>C]; FBpp0077711:c.[241-774T>C]; FBpp0077710:c.[241-774T>C]; FBpp0303523:c.[241-774T>C]; FBpp0303524:c.[241-774T>C]; FBpp0089226:c.[241-774T>C]
2L mapping	333423	SNV	1	C	A	34	100	34.7647	Gene: FBgn0004611, Misc. feature: contig 2L_1_7 1..50000(1)	FBpp0089226:c.[241-697C>A]; FBpp0303524:c.[241-697C>A]; FBpp0077710:c.[241-697C>A]; FBpp0077711:c.[241-697C>A]; FBpp0089225:c.[241-697C>A]; FBpp0303523:c.[241-697C>A]
2L mapping	333590	SNV	1	T	A	37	100	34.9459	Gene: FBgn0004611, Misc. feature: contig 2L_1_7 1..50000(1)	FBpp0089226:c.[241-530T>A]; FBpp0303523:c.[241-530T>A]; FBpp0089225:c.[241-530T>A]; FBpp0077711:c.[241-530T>A]; FBpp0077710:c.[241-530T>A]; FBpp0303524:c.[241-530T>A]
2L mapping	333605	SNV	1	G	A	37	100	35.2703	Gene: FBgn0004611, Misc. feature: contig 2L_1_7 1..50000(1)	FBpp0089226:c.[241-515G>A]; FBpp0303523:c.[241-515G>A]; FBpp0303524:c.[241-515G>A]; FBpp0089225:c.[241-515G>A]; FBpp0077710:c.[241-515G>A]; FBpp0077711:c.[241-515G>A]
2L mapping	333667	SNV	1	A	T	41	100	34.4878	Gene: FBgn0004611, Misc. feature: contig 2L_1_7 1..50000(1)	FBpp0089226:c.[241-453A>T]; FBpp0303524:c.[241-453A>T]; FBpp0077710:c.[241-453A>T]; FBpp0089225:c.[241-453A>T]; FBpp0303523:c.[241-453A>T]; FBpp0077711:c.[241-453A>T]
2L mapping	333924	SNV	1	C	A	38	97.3684	35.8378	Gene: FBgn0004611, Misc. feature: contig 2L_1_7 1..50000(1)	FBpp0089226:c.[241-196C>A]; FBpp0089225:c.[241-196C>A]; FBpp0303523:c.[241-196C>A]; FBpp0077711:c.[241-196C>A]; FBpp0303524:c.[241-196C>A]; FBpp0077710:c.[241-196C>A]
2L mapping	334706	SNV	1	A	T	24	45.8333	36.0909	Gene: FBgn0004611, Misc. feature: contig 2L_1_7 1..50000(1)	FBpp0077711:c.[378+449A>T]; FBpp0303524:c.[378+449A>T]; FBpp0089225:c.[378+449A>T]; FBpp0303523:c.[378+449A>T]; FBpp0077710:c.[378+449A>T]; FBpp0089226:c.[378+449A>T]
2L mapping	334712	SNV	1	T	C	26	53.8462	36.4286	Gene: FBgn0004611, Misc. feature: contig 2L_1_7 1..50000(1)	FBpp0089225:c.[378+455T>C]; FBpp0303524:c.[378+455T>C]; FBpp0303523:c.[378+455T>C]; FBpp0077710:c.[378+455T>C]; FBpp0089226:c.[378+455T>C]; FBpp0077711:c.[378+455T>C]
2L mapping	334720	SNV	1	T	C	30	66.6667	34.95	Gene: FBgn0004611, Misc. feature: contig 2L_1_7 1..50000(1)	FBpp0077710:c.[378+463T>C]; FBpp0089226:c.[378+463T>C]; FBpp0303524:c.[378+463T>C]; FBpp0303523:c.[378+463T>C]; FBpp0077711:c.[378+463T>C]; FBpp0089225:c.[378+463T>C]
2L mapping	334986	SNV	1	A	C	42	100	36	Gene: FBgn0004611, Misc. feature: contig 2L_1_7 1..50000(1)	FBpp0077711:c.[379-429A>C]; FBpp0089226:c.[379-429A>C]; FBpp0089225:c.[379-429A>C]; FBpp0077710:c.[379-429A>C]; FBpp0303524:c.[379-429A>C]; FBpp0303523:c.[379-429A>C]
2L mapping	335152	SNV	1	A	G	29	96.5517	32.6071	Gene: FBgn0004611, Misc. feature: contig 2L_1_7 1..50000(1)	FBpp0077711:c.[379-263A>G]; FBpp0303524:c.[379-263A>G]; FBpp0089226:c.[379-263A>G]; FBpp0303523:c.[379-263A>G]; FBpp0077710:c.[379-263A>G]; FBpp0089225:c.[379-263A>G]
2L mapping	335673	Deletion	6	TTCGGG	-	31	48.3871	33.6	Gene: FBgn0004611, Misc. feature: contig 2L_1_7 1..50000(1)	FBpp0303523:c.[512+125_512+130delTTCGGG]; FBpp0089225:c.[512+125_512+130delTTCGGG]; FBpp0303524:c.[512+125_512+130delTTCGGG]; FBpp0089226:c.[512+125_512+130delTTCGGG]; FBpp0077711:c.[512+125_512+130delTTCGGG]; FBpp0077710:c.[512+125_512+130delTTCGGG]
2L mapping	335706	SNV	1	C	T	27	100	35.8519	Gene: FBgn0004611, Misc. feature: contig 2L_1_7 1..50000(1)	FBpp0303524:c.[512+158C>T]; FBpp0089226:c.[512+158C>T]; FBpp0077710:c.[512+158C>T]; FBpp0089225:c.[512+158C>T]; FBpp0077711:c.[512+158C>T]; FBpp0303523:c.[512+158C>T]
2L mapping	335752	SNV	1	A	T	26	100	35.2692	Gene: FBgn0004611, Misc. feature: contig 2L_1_7 1..50000(1)	FBpp0089226:c.[512+204A>T]; FBpp0077711:c.[512+204A>T]; FBpp0089225:c.[512+204A>T]; FBpp0303524:c.[512+204A>T]; FBpp0303523:c.[512+204A>T]; FBpp0077710:c.[512+204A>T]
2L mapping	336093	SNV	1	G	A	30	100	34.5	CDS: FBgn0004611, CDS: FBgn0004611, CDS: FBgn0004611, CDS: FBgn0004611, CDS: FBgn0004611, CDS: FBgn0004611, Exon: Exon, Gene: FBgn0004611, Misc. feature: contig 2L_1_7 1..50000(1), mRNA: FBgn0004611, mRNA: FBgn0004611, mRNA: FBgn0004611, mRNA: FBgn0004611, mRNA: FBgn0004611, mRNA: FBgn0004611	FBpp0089226:c.[588G>A]; FBpp0303524:c.[588G>A]; FBpp0303523:c.[588G>A]; FBpp0077710:c.[588G>A]; FBpp0077711:c.[588G>A]; FBpp0089225:c.[588G>A]
2L mapping	336508	SNV	1	T	C	39	100	34.359	CDS: FBgn0004611, CDS: FBgn0004611, CDS: FBgn0004611, CDS: FBgn0004611, CDS: FBgn0004611, CDS: FBgn0004611, Exon: Exon, Gene: FBgn0004611, Misc. feature: contig 2L_1_7 1..50000(1), mRNA: FBgn0004611, mRNA: FBgn0004611, mRNA: FBgn0004611, mRNA: FBgn0004611, mRNA: FBgn0004611, mRNA: FBgn0004611	FBpp0089226:c.[858T>C]; FBpp0303524:c.[858T>C]; FBpp0077711:c.[858T>C]; FBpp0303523:c.[858T>C]; FBpp0077710:c.[858T>C]; FBpp0089225:c.[858T>C]
2L mapping	336730	SNV	1	A	G	48	100	33.4375	Gene: FBgn0004611, Misc. feature: contig 2L_1_7 1..50000(1)	FBpp0089226:c.[896+184A>G]; FBpp0077710:c.[896+184A>G]; FBpp0077711:c.[896+184A>G]; FBpp0303523:c.[896+184A>G]; FBpp0089225:c.[896+184A>G]; FBpp0303524:c.[896+184A>G]
2L mapping	336792	SNV	1	G	T	38	97.3684	35.5676	Gene: FBgn0004611, Misc. feature: contig 2L_1_7 1..50000(1)	FBpp0089225:c.[897-224G>T]; FBpp0077710:c.[897-224G>T]; FBpp0077711:c.[897-224G>T]; FBpp0303524:c.[897-224G>T]; FBpp0089226:c.[897-224G>T]; FBpp0303523:c.[896+246G>T]
2L mapping	337209	SNV	1	G	A	33	100	34.9394	Gene: FBgn0004611, Misc. feature: contig 2L_1_7 1..50000(1)	FBpp0303523:c.[896+663G>A]; FBpp0089225:c.[1079+11G>A]; FBpp0089226:c.[1079+11G>A]; FBpp0077711:c.[1079+11G>A]; FBpp0303524:c.[1079+11G>A]; FBpp0077710:c.[1079+11G>A]
2L mapping	337220	SNV	1	T	A	31	96.7742	33.3667	Gene: FBgn0004611, Misc. feature: contig 2L_1_7 1..50000(1)	FBpp0303523:c.[896+674T>A]; FBpp0089226:c.[1079+22T>A]; FBpp0077711:c.[1079+22T>A]; FBpp0303524:c.[1079+22T>A]; FBpp0077710:c.[1079+22T>A]; FBpp0089225:c.[1079+22T>A]
2L mapping	337346	SNV	1	T	C	34	97.0588	36.6364	Gene: FBgn0004611, Misc. feature: contig 2L_1_7 1..50000(1)	FBpp0089225:c.[1079+148T>C]; FBpp0303524:c.[1079+148T>C]; FBpp0077711:c.[1079+148T>C]; FBpp0089226:c.[1079+148T>C]; FBpp0077710:c.[1079+148T>C]; FBpp0303523:c.[897-592T>C]
2L mapping	337448	SNV	1	T	C	31	100	34.4516	Gene: FBgn0004611, Misc. feature: contig 2L_1_7 1..50000(1)	FBpp0077711:c.[1079+250T>C]; FBpp0303523:c.[897-490T>C]; FBpp0303524:c.[1079+250T>C]; FBpp0077710:c.[1079+250T>C]; FBpp0089226:c.[1079+250T>C]; FBpp0089225:c.[1079+250T>C]
2L mapping	337509	MNV	2	TC	AT	47	100	35.234	Gene: FBgn0004611, Misc. feature: contig 2L_1_7 1..50000(1)	FBpp0089226:c.[1079+311_1079+312delTCinsAT]; FBpp0077710:c.[1079+311_1079+312delTCinsAT]; FBpp0303524:c.[1079+311_1079+312delTCinsAT]; FBpp0077711:c.[1079+311_1079+312delTCinsAT]; FBpp0089225:c.[1079+311_1079+312delTCinsAT]; FBpp0303523:c.[897-429_897-428delTCinsAT]
2L mapping	337525	SNV	1	C	T	51	100	35.8824	Gene: FBgn0004611, Misc. feature: contig 2L_1_7 1..50000(1)	FBpp0089226:c.[1079+327C>T]; FBpp0303523:c.[897-413C>T]; FBpp0077711:c.[1079+327C>T]; FBpp0077710:c.[1079+327C>T]; FBpp0303524:c.[1079+327C>T]; FBpp0089225:c.[1079+327C>T]
2L mapping	337570	MNV	2	AC	TA	37	100	35.1351	Gene: FBgn0004611, Misc. feature: contig 2L_1_7 1..50000(1)	FBpp0077710:c.[1080-368_1080-367delACinsTA]; FBpp0089225:c.[1080-368_1080-367delACinsTA]; FBpp0077711:c.[1080-368_1080-367delACinsTA]; FBpp0089226:c.[1080-368_1080-367delACinsTA]; FBpp0303523:c.[897-368_897-367delACinsTA]; FBpp0303524:c.[1080-368_1080-367delACinsTA]
2L mapping	337574	MNV	2	TA	AT	37	100	35.5405	Gene: FBgn0004611, Misc. feature: contig 2L_1_7 1..50000(1)	FBpp0303524:c.[1080-364_1080-363delTAinsAT]; FBpp0089225:c.[1080-364_1080-363delTAinsAT]; FBpp0077711:c.[1080-364_1080-363delTAinsAT]; FBpp0077710:c.[1080-364_1080-363delTAinsAT]; FBpp0089226:c.[1080-364_1080-363delTAinsAT]; FBpp0303523:c.[897-364_897-363delTAinsAT]
2L mapping	337583	SNV	1	C	A	42	100	36.0238	Gene: FBgn0004611, Misc. feature: contig 2L_1_7 1..50000(1)	FBpp0077711:c.[1080-355C>A]; FBpp0303523:c.[897-355C>A]; FBpp0089226:c.[1080-355C>A]; FBpp0303524:c.[1080-355C>A]; FBpp0089225:c.[1080-355C>A]; FBpp0077710:c.[1080-355C>A]
2L mapping	337841	SNV	1	G	A	33	96.9697	35.75	Gene: FBgn0004611, Misc. feature: contig 2L_1_7 1..50000(1)	FBpp0303523:c.[897-97G>A]; FBpp0089226:c.[1080-97G>A]; FBpp0077711:c.[1080-97G>A]; FBpp0089225:c.[1080-97G>A]; FBpp0077710:c.[1080-97G>A]; FBpp0303524:c.[1080-97G>A]
2L mapping	338305	SNV	1	C	G	58	100	33.3103	Gene: FBgn0004611, Misc. feature: contig 2L_1_7 1..50000(1)	FBpp0077710:c.[1260+187C>G]; FBpp0303524:c.[1260+187C>G]; FBpp0303523:c.[1077+187C>G]; FBpp0089226:c.[1260+187C>G]; FBpp0077711:c.[1260+187C>G]; FBpp0089225:c.[1260+187C>G]
2L mapping	338520	SNV	1	A	C	42	100	35.3333	Gene: FBgn0004611, Misc. feature: contig 2L_1_7 1..50000(1)	FBpp0089225:c.[1260+402A>C]; FBpp0077710:c.[1260+402A>C]; FBpp0303524:c.[1260+402A>C]; FBpp0089226:c.[1260+402A>C]; FBpp0303523:c.[1077+402A>C]; FBpp0077711:c.[1260+402A>C]
2L mapping	338919	SNV	1	C	T	44	100	34.2045	Gene: FBgn0004611, Misc. feature: contig 2L_1_7 1..50000(1)	FBpp0077711:c.[1261-288C>T]; FBpp0303523:c.[1078-288C>T]; FBpp0089225:c.[1261-288C>T]; FBpp0089226:c.[1261-288C>T]; FBpp0303524:c.[1261-288C>T]; FBpp0077710:c.[1261-288C>T]
2L mapping	339014	Insertion	2	-	AT	53	83.0189	35.7273	Gene: FBgn0004611, Misc. feature: contig 2L_1_7 1..50000(1)	FBpp0089226:c.[1261-194_1261-193insAT]; FBpp0089225:c.[1261-194_1261-193insAT]; FBpp0303523:c.[1078-194_1078-193insAT]; FBpp0077710:c.[1261-194_1261-193insAT]; FBpp0303524:c.[1261-194_1261-193insAT]; FBpp0077711:c.[1261-194_1261-193insAT]
2L mapping	339030	Insertion	5	-	TCTTA	39	71.7949	35.6143	Gene: FBgn0004611, Misc. feature: contig 2L_1_7 1..50000(1)	FBpp0089226:c.[1261-178_1261-177insTCTTA]; FBpp0077710:c.[1261-178_1261-177insTCTTA]; FBpp0089225:c.[1261-178_1261-177insTCTTA]; FBpp0303523:c.[1078-178_1078-177insTCTTA]; FBpp0303524:c.[1261-178_1261-177insTCTTA]; FBpp0077711:c.[1261-178_1261-177insTCTTA]
2L mapping	339145	SNV	1	C	T	46	100	35.1522	Gene: FBgn0004611, Misc. feature: contig 2L_1_7 1..50000(1)	FBpp0089225:c.[1261-62C>T]; FBpp0077711:c.[1261-62C>T]; FBpp0303523:c.[1078-62C>T]; FBpp0303524:c.[1261-62C>T]; FBpp0089226:c.[1261-62C>T]; FBpp0077710:c.[1261-62C>T]
2L mapping	339392	SNV	1	G	T	42	100	33.6667	CDS: FBgn0004611, CDS: FBgn0004611, CDS: FBgn0004611, CDS: FBgn0004611, CDS: FBgn0004611, CDS: FBgn0004611, Exon: Exon, Gene: FBgn0004611, Misc. feature: contig 2L_1_7 1..50000(1), mRNA: FBgn0004611, mRNA: FBgn0004611, mRNA: FBgn0004611, mRNA: FBgn0004611, mRNA: FBgn0004611, mRNA: FBgn0004611	FBpp0077710:c.[1446G>T]; FBpp0077711:c.[1446G>T]; FBpp0303524:c.[1446G>T]; FBpp0089225:c.[1446G>T]; FBpp0089226:c.[1446G>T]; FBpp0303523:c.[1263G>T]
2L mapping	339514	SNV	1	T	C	37	97.2973	34.8056	Gene: FBgn0004611, Misc. feature: contig 2L_1_7 1..50000(1)	FBpp0089225:c.[1495+73T>C]; FBpp0089226:c.[1495+73T>C]; FBpp0077711:c.[1495+73T>C]; FBpp0303523:c.[1312+73T>C]; FBpp0303524:c.[1495+73T>C]; FBpp0077710:c.[1495+73T>C]
2L mapping	339800	SNV	1	A	G	40	97.5	34.8462	Gene: FBgn0004611, Misc. feature: contig 2L_1_7 1..50000(1)	FBpp0303523:c.[1312+359A>G]; FBpp0089226:c.[1495+359A>G]; FBpp0077710:c.[1495+359A>G]; FBpp0303524:c.[1495+359A>G]; FBpp0089225:c.[1495+359A>G]; FBpp0077711:c.[1495+359A>G]
2L mapping	340570	SNV	1	C	G	39	100	31.2821	Gene: FBgn0004611, Misc. feature: contig 2L_1_7 1..50000(1)	FBpp0303524:c.[1496-140C>G]; FBpp0089225:c.[1496-140C>G]; FBpp0089226:c.[1496-140C>G]; FBpp0077710:c.[1496-140C>G]; FBpp0303523:c.[1313-140C>G]; FBpp0077711:c.[1496-140C>G]
2L mapping	340583	SNV	1	G	C	40	100	32.75	Gene: FBgn0004611, Misc. feature: contig 2L_1_7 1..50000(1)	FBpp0303523:c.[1313-127G>C]; FBpp0077711:c.[1496-127G>C]; FBpp0303524:c.[1496-127G>C]; FBpp0077710:c.[1496-127G>C]; FBpp0089226:c.[1496-127G>C]; FBpp0089225:c.[1496-127G>C]
2L mapping	340628	SNV	1	C	T	50	100	34.14	Gene: FBgn0004611, Misc. feature: contig 2L_1_7 1..50000(1)	FBpp0077710:c.[1496-82C>T]; FBpp0089226:c.[1496-82C>T]; FBpp0303523:c.[1313-82C>T]; FBpp0077711:c.[1496-82C>T]; FBpp0089225:c.[1496-82C>T]; FBpp0303524:c.[1496-82C>T]
2L mapping	340737	SNV	1	G	C	32	100	34.0625	CDS: FBgn0004611, CDS: FBgn0004611, CDS: FBgn0004611, CDS: FBgn0004611, CDS: FBgn0004611, CDS: FBgn0004611, Exon: Exon, Gene: FBgn0004611, Misc. feature: contig 2L_1_7 1..50000(1), mRNA: FBgn0004611, mRNA: FBgn0004611, mRNA: FBgn0004611, mRNA: FBgn0004611, mRNA: FBgn0004611, mRNA: FBgn0004611	FBpp0089225:c.[1523G>C]; FBpp0303524:c.[1523G>C]; FBpp0089226:c.[1523G>C]; FBpp0077710:c.[1523G>C]; FBpp0077711:c.[1523G>C]; FBpp0303523:c.[1340G>C]	FBpp0089225:p.[Gly508Ala]; FBpp0303524:p.[Gly508Ala]; FBpp0089226:p.[Gly508Ala]; FBpp0077710:p.[Gly508Ala]; FBpp0077711:p.[Gly508Ala]; FBpp0303523:p.[Gly447Ala]
2L mapping	340937	SNV	1	A	C	44	100	34.8636	Gene: FBgn0004611, Misc. feature: contig 2L_1_7 1..50000(1)	FBpp0303523:c.[1458+82A>C]; FBpp0089225:c.[1641+82A>C]; FBpp0077711:c.[1641+82A>C]; FBpp0077710:c.[1641+82A>C]; FBpp0089226:c.[1641+82A>C]; FBpp0303524:c.[1641+82A>C]
2L mapping	341158	SNV	1	A	T	58	100	34.2069	Gene: FBgn0004611, Misc. feature: contig 2L_1_7 1..50000(1)	FBpp0089226:c.[1641+303A>T]; FBpp0077711:c.[1641+303A>T]; FBpp0303523:c.[1458+303A>T]; FBpp0077710:c.[1641+303A>T]; FBpp0089225:c.[1641+303A>T]; FBpp0303524:c.[1641+303A>T]
2L mapping	341194	SNV	1	A	G	56	100	35.7321	Gene: FBgn0004611, Misc. feature: contig 2L_1_7 1..50000(1)	FBpp0303524:c.[1641+339A>G]; FBpp0303523:c.[1458+339A>G]; FBpp0089226:c.[1641+339A>G]; FBpp0089225:c.[1641+339A>G]; FBpp0077711:c.[1641+339A>G]; FBpp0077710:c.[1641+339A>G]
2L mapping	341242	SNV	1	A	T	43	100	35.1395	Gene: FBgn0004611, Misc. feature: contig 2L_1_7 1..50000(1)	FBpp0303523:c.[1458+387A>T]; FBpp0089225:c.[1641+387A>T]; FBpp0089226:c.[1641+387A>T]; FBpp0077711:c.[1641+387A>T]; FBpp0303524:c.[1641+387A>T]; FBpp0077710:c.[1641+387A>T]
2L mapping	341362	Deletion	1	T	-	41	68.2927	33.25	Gene: FBgn0004611, Misc. feature: contig 2L_1_7 1..50000(1)	FBpp0089226:c.[1641+507delT]; FBpp0303523:c.[1458+507delT]; FBpp0077710:c.[1641+507delT]; FBpp0077711:c.[1641+507delT]; FBpp0089225:c.[1641+507delT]; FBpp0303524:c.[1641+507delT]
2L mapping	341538	MNV	2	TA	AC	51	43.1373	33.9773	Gene: FBgn0004611, Misc. feature: contig 2L_1_7 1..50000(1)	FBpp0303523:c.[1458+683_1458+684delTAinsAC]; FBpp0077710:c.[1641+683_1641+684delTAinsAC]; FBpp0089225:c.[1641+683_1641+684delTAinsAC]; FBpp0089226:c.[1641+683_1641+684delTAinsAC]; FBpp0077711:c.[1641+683_1641+684delTAinsAC]; FBpp0303524:c.[1641+683_1641+684delTAinsAC]
2L mapping	341757	SNV	1	A	G	45	100	32.3778	Gene: FBgn0004611, Misc. feature: contig 2L_1_7 1..50000(1)	FBpp0077711:c.[1642-822A>G]; FBpp0077710:c.[1642-822A>G]; FBpp0089225:c.[1642-822A>G]; FBpp0303523:c.[1459-822A>G]; FBpp0303524:c.[1642-822A>G]; FBpp0089226:c.[1642-822A>G]
2L mapping	341897	SNV	1	T	G	48	97.9167	35.8085	Gene: FBgn0004611, Misc. feature: contig 2L_1_7 1..50000(1)	FBpp0303524:c.[1642-682T>G]; FBpp0089225:c.[1642-682T>G]; FBpp0303523:c.[1459-682T>G]; FBpp0089226:c.[1642-682T>G]; FBpp0077711:c.[1642-682T>G]; FBpp0077710:c.[1642-682T>G]
2L mapping	341992	SNV	1	C	G	30	100	35.3	Gene: FBgn0004611, Misc. feature: contig 2L_1_7 1..50000(1)	FBpp0089226:c.[1642-587C>G]; FBpp0089225:c.[1642-587C>G]; FBpp0303523:c.[1459-587C>G]; FBpp0077711:c.[1642-587C>G]; FBpp0077710:c.[1642-587C>G]; FBpp0303524:c.[1642-587C>G]
2L mapping	341998	SNV	1	A	G	30	100	35.3333	Gene: FBgn0004611, Misc. feature: contig 2L_1_7 1..50000(1)	FBpp0303524:c.[1642-581A>G]; FBpp0077710:c.[1642-581A>G]; FBpp0077711:c.[1642-581A>G]; FBpp0089225:c.[1642-581A>G]; FBpp0303523:c.[1459-581A>G]; FBpp0089226:c.[1642-581A>G]
2L mapping	342098	SNV	1	A	C	36	100	33.8333	Gene: FBgn0004611, Misc. feature: contig 2L_1_7 1..50000(1)	FBpp0303523:c.[1459-481A>C]; FBpp0077710:c.[1642-481A>C]; FBpp0089225:c.[1642-481A>C]; FBpp0303524:c.[1642-481A>C]; FBpp0077711:c.[1642-481A>C]; FBpp0089226:c.[1642-481A>C]
2L mapping	342171	SNV	1	T	G	46	100	33.7391	Gene: FBgn0004611, Misc. feature: contig 2L_1_7 1..50000(1)	FBpp0089226:c.[1642-408T>G]; FBpp0077710:c.[1642-408T>G]; FBpp0303523:c.[1459-408T>G]; FBpp0303524:c.[1642-408T>G]; FBpp0089225:c.[1642-408T>G]; FBpp0077711:c.[1642-408T>G]
2L mapping	342215	SNV	1	T	A	49	100	35.2653	Gene: FBgn0004611, Misc. feature: contig 2L_1_7 1..50000(1)	FBpp0089226:c.[1642-364T>A]; FBpp0303523:c.[1459-364T>A]; FBpp0089225:c.[1642-364T>A]; FBpp0077710:c.[1642-364T>A]; FBpp0077711:c.[1642-364T>A]; FBpp0303524:c.[1642-364T>A]
2L mapping	342394	SNV	1	T	C	41	100	34.2683	Gene: FBgn0004611, Misc. feature: contig 2L_1_7 1..50000(1)	FBpp0089225:c.[1642-185T>C]; FBpp0303523:c.[1459-185T>C]; FBpp0089226:c.[1642-185T>C]; FBpp0303524:c.[1642-185T>C]; FBpp0077710:c.[1642-185T>C]; FBpp0077711:c.[1642-185T>C]
2L mapping	342423	SNV	1	A	G	34	100	35.9706	Gene: FBgn0004611, Misc. feature: contig 2L_1_7 1..50000(1)	FBpp0077710:c.[1642-156A>G]; FBpp0089225:c.[1642-156A>G]; FBpp0077711:c.[1642-156A>G]; FBpp0089226:c.[1642-156A>G]; FBpp0303523:c.[1459-156A>G]; FBpp0303524:c.[1642-156A>G]
2L mapping	342549	SNV	1	T	C	36	100	35.2222	Gene: FBgn0004611, Misc. feature: contig 2L_1_7 1..50000(1)	FBpp0303523:c.[1459-30T>C]; FBpp0077710:c.[1642-30T>C]; FBpp0089225:c.[1642-30T>C]; FBpp0089226:c.[1642-30T>C]; FBpp0303524:c.[1642-30T>C]; FBpp0077711:c.[1642-30T>C]
2L mapping	342562	SNV	1	T	C	38	100	34.2632	Gene: FBgn0004611, Misc. feature: contig 2L_1_7 1..50000(1)	FBpp0303524:c.[1642-17T>C]; FBpp0303523:c.[1459-17T>C]; FBpp0089225:c.[1642-17T>C]; FBpp0089226:c.[1642-17T>C]; FBpp0077711:c.[1642-17T>C]; FBpp0077710:c.[1642-17T>C]
2L mapping	342802	MNV	2	CC	AA	35	97.1429	33.7206	Gene: FBgn0004611, Misc. feature: contig 2L_1_7 1..50000(1)	FBpp0089226:c.[1855+10_1855+11delCCinsAA]; FBpp0303523:c.[1672+10_1672+11delCCinsAA]; FBpp0077711:c.[1855+10_1855+11delCCinsAA]; FBpp0089225:c.[1855+10_1855+11delCCinsAA]; FBpp0303524:c.[1855+10_1855+11delCCinsAA]; FBpp0077710:c.[1855+10_1855+11delCCinsAA]
2L mapping	342858	SNV	1	T	G	38	100	35.5526	Gene: FBgn0004611, Misc. feature: contig 2L_1_7 1..50000(1)	FBpp0089225:c.[1856-8T>G]; FBpp0077711:c.[1856-8T>G]; FBpp0303523:c.[1673-8T>G]; FBpp0089226:c.[1856-8T>G]; FBpp0303524:c.[1856-8T>G]; FBpp0077710:c.[1856-8T>G]
2L mapping	343158	SNV	1	A	C	33	100	33.4242	CDS: FBgn0004611, CDS: FBgn0004611, CDS: FBgn0004611, CDS: FBgn0004611, CDS: FBgn0004611, CDS: FBgn0004611, Exon: Exon, Gene: FBgn0004611, Misc. feature: contig 2L_1_7 1..50000(1), mRNA: FBgn0004611, mRNA: FBgn0004611, mRNA: FBgn0004611, mRNA: FBgn0004611, mRNA: FBgn0004611, mRNA: FBgn0004611	FBpp0077711:c.[2148A>C]; FBpp0089225:c.[2148A>C]; FBpp0303524:c.[2148A>C]; FBpp0077710:c.[2148A>C]; FBpp0303523:c.[1965A>C]; FBpp0089226:c.[2148A>C]
2L mapping	344985	SNV	1	T	A	36	100	34.5	Gene: FBgn0004611, Misc. feature: contig 2L_1_7 1..50000(1)	FBpp0303523:c.[3375-24T>A]; FBpp0089225:c.[3558-24T>A]; FBpp0089226:c.[3579-24T>A]; FBpp0077711:c.[3561-24T>A]; FBpp0303524:c.[3543-24T>A]; FBpp0077710:c.[3561-24T>A]
2L mapping	345166	SNV	1	A	G	48	100	35.4792	Gene: FBgn0004611, Misc. feature: contig 2L_1_7 1..50000(1)	FBpp0089225:c.[3702+13A>G]; FBpp0089226:c.[3723+13A>G]; FBpp0303524:c.[3687+13A>G]; FBpp0077711:c.[3705+13A>G]; FBpp0303523:c.[3519+13A>G]; FBpp0077710:c.[3705+13A>G]
2L mapping	345190	SNV	1	C	G	53	100	34.0943	Gene: FBgn0004611, Misc. feature: contig 2L_1_7 1..50000(1)	FBpp0303523:c.[3520-25C>G]; FBpp0303524:c.[3688-25C>G]; FBpp0077710:c.[3706-25C>G]; FBpp0077711:c.[3706-25C>G]; FBpp0089226:c.[3724-25C>G]; FBpp0089225:c.[3703-25C>G]
2L mapping	345207	SNV	1	A	C	53	100	35.5094	Gene: FBgn0004611, Misc. feature: contig 2L_1_7 1..50000(1)	FBpp0089225:c.[3703-8A>C]; FBpp0303523:c.[3520-8A>C]; FBpp0303524:c.[3688-8A>C]; FBpp0077711:c.[3706-8A>C]; FBpp0089226:c.[3724-8A>C]; FBpp0077710:c.[3706-8A>C]
2L mapping	345229	SNV	1	C	G	45	100	34.2667	CDS: FBgn0004611, CDS: FBgn0004611, CDS: FBgn0004611, CDS: FBgn0004611, CDS: FBgn0004611, CDS: FBgn0004611, Exon: Exon, Exon: Exon, Exon: Exon, Exon: Exon, Gene: FBgn0004611, Misc. feature: contig 2L_1_7 1..50000(1), mRNA: FBgn0004611, mRNA: FBgn0004611, mRNA: FBgn0004611, mRNA: FBgn0004611, mRNA: FBgn0004611, mRNA: FBgn0004611	FBpp0303523:c.[3534C>G]; FBpp0303524:c.[3702C>G]; FBpp0077710:c.[3720C>G]; FBpp0077711:c.[3720C>G]; FBpp0089225:c.[3717C>G]; FBpp0089226:c.[3738C>G]
2L mapping	346252	SNV	1	C	T	53	90.566	36.7083	Exon: Exon, Exon: Exon, Exon: Exon, Exon: Exon, Gene: FBgn0004611, Misc. feature: contig 2L_1_7 1..50000(1), mRNA: FBgn0004611, mRNA: FBgn0004611, mRNA: FBgn0004611, mRNA: FBgn0004611, mRNA: FBgn0004611, mRNA: FBgn0004611
2L mapping	346425	SNV	1	T	C	57	100	35.7193	Exon: Exon, Exon: Exon, Exon: Exon, Gene: FBgn0004611, Misc. feature: contig 2L_1_7 1..50000(1), mRNA: FBgn0004611, mRNA: FBgn0004611, mRNA: FBgn0004611
2L mapping	346605	SNV	1	C	A	47	100	33.617	Exon: Exon, Exon: Exon, Gene: FBgn0004611, Misc. feature: contig 2L_1_7 1..50000(1), mRNA: FBgn0004611, mRNA: FBgn0004611
2L mapping	346672	SNV	1	A	T	47	100	35.4681	Exon: Exon, Exon: Exon, Gene: FBgn0004611, Misc. feature: contig 2L_1_7 1..50000(1), mRNA: FBgn0004611, mRNA: FBgn0004611
2L mapping	346882	MNV	2	AT	TA	36	94.4444	36.25	Exon: Exon, Exon: Exon, Gene: FBgn0004611, Misc. feature: contig 2L_1_7 1..50000(1), mRNA: FBgn0004611, mRNA: FBgn0004611
2L mapping	347113	SNV	1	A	C	49	100	34.9592	Exon: Exon, Exon: Exon, Gene: FBgn0004611, Misc. feature: contig 2L_1_7 1..50000(1), mRNA: FBgn0004611, mRNA: FBgn0004611
2L mapping	347246	SNV	1	C	A	45	100	33.7778	Exon: Exon, Exon: Exon, Gene: FBgn0004611, Misc. feature: contig 2L_1_7 1..50000(1), mRNA: FBgn0004611, mRNA: FBgn0004611
2L mapping	347385	SNV	1	G	A	43	100	35.6512	Exon: Exon, Exon: Exon, Gene: FBgn0004611, Misc. feature: contig 2L_1_7 1..50000(1), mRNA: FBgn0004611, mRNA: FBgn0004611
2L mapping	347518	SNV	1	C	A	44	100	35.9545	Exon: Exon, Exon: Exon, Gene: FBgn0004611, Misc. feature: contig 2L_1_7 1..50000(1), mRNA: FBgn0004611, mRNA: FBgn0004611
2L mapping	347604	SNV	1	C	T	50	100	36.14	Exon: Exon, Exon: Exon, Gene: FBgn0004611, Misc. feature: contig 2L_1_7 1..50000(1), mRNA: FBgn0004611, mRNA: FBgn0004611
2L mapping	347726	SNV	1	A	T	38	100	36.2895	Exon: Exon, Exon: Exon, Gene: FBgn0004611, Misc. feature: contig 2L_1_7 1..50000(1), mRNA: FBgn0004611, mRNA: FBgn0004611
2L mapping	347831	SNV	1	C	A	47	100	35.5319	Exon: Exon, Exon: Exon, Gene: FBgn0004611, Misc. feature: contig 2L_1_7 1..50000(1), mRNA: FBgn0004611, mRNA: FBgn0004611
2L mapping	355957	SNV	1	C	T	49	100	34.2857	Misc. RNA: FBgn0266907, CDS: FBgn0031250, CDS: FBgn0031250, CDS: FBgn0031250, Exon: Exon, Exon: Exon, Gene: FBgn0031250, Gene: FBgn0266907, Misc. feature: contig 2L_1_8 1..50000(1), mRNA: FBgn0031250, mRNA: FBgn0031250, mRNA: FBgn0031250	FBpp0077753:c.[1392G>A]; FBpp0303501:c.[1392G>A]; FBpp0077754:c.[1392G>A]
2L mapping	356206	SNV	1	C	T	40	100	35.375	Misc. RNA: FBgn0266907, CDS: FBgn0031250, CDS: FBgn0031250, CDS: FBgn0031250, Exon: Exon, Exon: Exon, Gene: FBgn0031250, Gene: FBgn0266907, Misc. feature: contig 2L_1_8 1..50000(1), mRNA: FBgn0031250, mRNA: FBgn0031250, mRNA: FBgn0031250	FBpp0077753:c.[1143G>A]; FBpp0077754:c.[1143G>A]; FBpp0303501:c.[1143G>A]
2L mapping	356221	SNV	1	T	A	38	100	36.0263	Misc. RNA: FBgn0266907, CDS: FBgn0031250, CDS: FBgn0031250, CDS: FBgn0031250, Exon: Exon, Exon: Exon, Gene: FBgn0031250, Gene: FBgn0266907, Misc. feature: contig 2L_1_8 1..50000(1), mRNA: FBgn0031250, mRNA: FBgn0031250, mRNA: FBgn0031250	FBpp0303501:c.[1128A>T]; FBpp0077753:c.[1128A>T]; FBpp0077754:c.[1128A>T]	FBpp0303501:p.[Leu376Phe]; FBpp0077753:p.[Leu376Phe]; FBpp0077754:p.[Leu376Phe]
2L mapping	360210	SNV	1	T	A	20	90	35.2222	Misc. feature: contig 2L_1_8 1..50000(1)
2L mapping	362985	Deletion	1	T	-	144	46.5278	32.9552	Misc. feature: contig 2L_1_8 1..50000(1)
2L mapping	363986	MNV	2	CC	AA	53	58.4906	35.3387	Misc. feature: contig 2L_1_8 1..50000(1)
2L mapping	364035	SNV	1	T	G	93	46.2366	33.8372	Misc. feature: contig 2L_1_8 1..50000(1)
2L mapping	371253	SNV	1	G	T	36	100	34.9444	Misc. feature: contig 2L_1_8 1..50000(1)
2L mapping	371772	SNV	1	T	G	38	100	34	Misc. feature: contig 2L_1_8 1..50000(1)
2L mapping	371936	SNV	1	T	C	40	100	35.4	Misc. feature: contig 2L_1_8 1..50000(1)
2L mapping	372188	SNV	1	A	G	48	100	34.3333	Misc. feature: contig 2L_1_8 1..50000(1)
2L mapping	372198	SNV	1	C	G	50	100	33.64	Misc. feature: contig 2L_1_8 1..50000(1)
2L mapping	373319	SNV	1	A	G	54	100	35.5741	Misc. feature: contig 2L_1_8 1..50000(1)
2L mapping	374693	SNV	1	A	T	45	100	35.3111	Misc. feature: contig 2L_1_8 1..50000(1)
2L mapping	374736	SNV	1	C	A	40	100	35.475	Misc. feature: contig 2L_1_8 1..50000(1)
2L mapping	375898	SNV	1	C	G	43	100	33.4884	Misc. feature: contig 2L_1_8 1..50000(1)
2L mapping	375966	SNV	1	C	T	29	100	34.2069	Misc. feature: contig 2L_1_8 1..50000(1)
2L mapping	376430	SNV	1	C	T	51	100	35.7451	Misc. feature: contig 2L_1_8 1..50000(1)
2L mapping	376463	SNV	1	C	T	38	100	36.4737	Misc. feature: contig 2L_1_8 1..50000(1)
2L mapping	377273	SNV	1	T	A	30	100	35.8333	Misc. feature: contig 2L_1_8 1..50000(1)
2L mapping	379087	SNV	1	A	G	40	100	33.3	Gene: FBgn0000061, Misc. feature: contig 2L_1_8 1..50000(1)
2L mapping	379346	SNV	1	G	A	42	100	35.6905	Gene: FBgn0000061, Misc. feature: contig 2L_1_8 1..50000(1)
2L mapping	379422	SNV	1	T	G	43	100	32.4419	Gene: FBgn0000061, Misc. feature: contig 2L_1_8 1..50000(1)
2L mapping	379490	SNV	1	A	C	31	96.7742	35.1667	Gene: FBgn0000061, Misc. feature: contig 2L_1_8 1..50000(1)
2L mapping	379692	SNV	1	A	G	45	100	33.8667	Gene: FBgn0000061, Misc. feature: contig 2L_1_8 1..50000(1)
2L mapping	379873	SNV	1	T	G	28	96.4286	31.963	Gene: FBgn0000061, Misc. feature: contig 2L_1_8 1..50000(1)
2L mapping	379879	SNV	1	G	A	25	100	29.44	Gene: FBgn0000061, Misc. feature: contig 2L_1_8 1..50000(1)
2L mapping	380421	Deletion	1	T	-	34	94.1176	35.3125	Gene: FBgn0000061, Misc. feature: contig 2L_1_8 1..50000(1)
2L mapping	380424	SNV	1	A	C	33	100	35.2424	Gene: FBgn0000061, Misc. feature: contig 2L_1_8 1..50000(1)
2L mapping	380513	SNV	1	C	T	38	100	35.7895	Gene: FBgn0000061, Misc. feature: contig 2L_1_8 1..50000(1)
2L mapping	380540	SNV	1	T	A	36	100	34.5833	Gene: FBgn0000061, Misc. feature: contig 2L_1_8 1..50000(1)
2L mapping	380741	SNV	1	C	T	29	100	34.1724	Gene: FBgn0000061, Misc. feature: contig 2L_1_8 1..50000(1)
2L mapping	381261	SNV	1	C	T	33	100	34.3636	Gene: FBgn0000061, Misc. feature: contig 2L_1_8 1..50000(1)
2L mapping	381386	SNV	1	G	A	54	100	35.2037	Gene: FBgn0000061, Misc. feature: contig 2L_1_8 1..50000(1)
2L mapping	381570	Insertion	1	-	T	39	100	34.7436	Gene: FBgn0000061, Misc. feature: contig 2L_1_8 1..50000(1)
2L mapping	381787	SNV	1	A	G	38	100	33.9474	Gene: FBgn0000061, Misc. feature: contig 2L_1_8 1..50000(1)
2L mapping	381846	SNV	1	T	C	39	100	35.1282	Gene: FBgn0000061, Misc. feature: contig 2L_1_8 1..50000(1)
2L mapping	382173	SNV	1	G	C	26	100	34.3077	Gene: FBgn0000061, Misc. feature: contig 2L_1_8 1..50000(1)
2L mapping	382411	SNV	1	T	C	29	100	34.4483	Gene: FBgn0000061, Misc. feature: contig 2L_1_8 1..50000(1)
2L mapping	383384	SNV	1	G	C	37	100	32.1081	Gene: FBgn0000061, Misc. feature: contig 2L_1_8 1..50000(1)
2L mapping	383450	SNV	1	T	C	28	100	35.4286	Gene: FBgn0000061, Misc. feature: contig 2L_1_8 1..50000(1)
2L mapping	384022	SNV	1	T	G	34	97.0588	32.8182	Gene: FBgn0000061, Misc. feature: contig 2L_1_8 1..50000(1)
2L mapping	385552	SNV	1	A	T	39	100	35.0769	Gene: FBgn0000061, Misc. feature: contig 2L_1_8 1..50000(1)	FBpp0077713:c.345-149A>T
2L mapping	386803	SNV	1	A	C	30	100	31.5333	CDS: FBgn0000061, Exon: Exon, Gene: FBgn0000061, Misc. feature: contig 2L_1_8 1..50000(1), mRNA: FBgn0000061	FBpp0077713:c.760A>C	FBpp0077713:p.Thr254Pro
2L mapping	388850	SNV	1	A	G	44	100	34.0909	Misc. feature: contig 2L_1_8 1..50000(1)
2L mapping	390144	SNV	1	G	T	30	100	32.7667	Misc. feature: contig 2L_1_8 1..50000(1)
2L mapping	390346	SNV	1	C	T	33	100	34.4545	Misc. feature: contig 2L_1_8 1..50000(1)
2L mapping	390348	SNV	1	A	T	33	100	34.6364	Misc. feature: contig 2L_1_8 1..50000(1)
2L mapping	390919	SNV	1	A	G	33	100	33.3636	Misc. feature: contig 2L_1_8 1..50000(1)
2L mapping	390995	SNV	1	T	C	40	100	34.725	Misc. feature: contig 2L_1_8 1..50000(1)
2L mapping	391036	SNV	1	G	C	47	100	35.2979	Misc. feature: contig 2L_1_8 1..50000(1)
2L mapping	391220	SNV	1	A	T	39	100	35.4872	Misc. feature: contig 2L_1_8 1..50000(1)
2L mapping	391355	Deletion	2	AA	-	36	66.6667	30.9167	Misc. feature: contig 2L_1_8 1..50000(1)
2L mapping	391520	SNV	1	A	C	31	100	36.0968	Misc. feature: contig 2L_1_8 1..50000(1)
2L mapping	391610	SNV	1	A	C	47	100	35.0213	Misc. feature: contig 2L_1_8 1..50000(1)
2L mapping	392403	SNV	1	A	C	40	100	35.025	Misc. feature: contig 2L_1_8 1..50000(1)
2L mapping	392479	SNV	1	G	A	39	100	35.9487	Misc. feature: contig 2L_1_8 1..50000(1)
2L mapping	392659	SNV	1	G	C	40	100	35.25	Misc. feature: contig 2L_1_8 1..50000(1)
2L mapping	393134	SNV	1	G	A	39	100	34.3846	Misc. feature: contig 2L_1_8 1..50000(1)
2L mapping	393147	SNV	1	A	C	36	100	36.3333	Misc. feature: contig 2L_1_8 1..50000(1)
2L mapping	393445	SNV	1	G	A	40	100	34.175	Misc. feature: contig 2L_1_8 1..50000(1)
2L mapping	393669	SNV	1	T	G	58	37.931	35.5909	Misc. feature: contig 2L_1_8 1..50000(1)
2L mapping	393674	Replacement	2	GT	A	56	39.2857	35.3636	Misc. feature: contig 2L_1_8 1..50000(1)
2L mapping	393983	SNV	1	A	C	34	100	33.2353	Misc. feature: contig 2L_1_8 1..50000(1)
2L mapping	394019	SNV	1	A	G	38	100	34.7632	Misc. feature: contig 2L_1_8 1..50000(1)
2L mapping	394144	SNV	1	G	T	41	100	35.8049	Misc. feature: contig 2L_1_8 1..50000(1)
2L mapping	394202	SNV	1	T	C	37	100	35.8919	Misc. feature: contig 2L_1_8 1..50000(1)
2L mapping	395650	SNV	1	T	A	36	100	35.75	Misc. feature: contig 2L_1_8 1..50000(1)
2L mapping	395753	SNV	1	T	G	41	100	32.1463	Misc. feature: contig 2L_1_8 1..50000(1)
2L mapping	395765	SNV	1	C	G	41	100	35.2683	Misc. feature: contig 2L_1_8 1..50000(1)
2L mapping	395803	SNV	1	G	T	33	100	33.8182	Misc. feature: contig 2L_1_8 1..50000(1)
2L mapping	395914	SNV	1	A	G	40	100	34.35	Misc. feature: contig 2L_1_8 1..50000(1)
2L mapping	396351	SNV	1	T	G	38	100	33.7368	Misc. RNA: FBgn0263871, Exon: Exon, Gene: FBgn0263871, Misc. feature: contig 2L_1_8 1..50000(1)
2L mapping	396526	SNV	1	C	T	38	100	35.5789	Misc. RNA: FBgn0263871, Exon: Exon, Gene: FBgn0263871, Misc. feature: contig 2L_1_8 1..50000(1)
2L mapping	396732	SNV	1	A	T	41	100	36.4634	Exon: Exon, Gene: FBgn0031251, Misc. feature: contig 2L_1_8 1..50000(1), mRNA: FBgn0031251, mRNA: FBgn0031251
2L mapping	397016	SNV	1	A	G	34	100	35.5294	CDS: FBgn0031251, CDS: FBgn0031251, Exon: Exon, Gene: FBgn0031251, Misc. feature: contig 2L_1_8 1..50000(1), mRNA: FBgn0031251, mRNA: FBgn0031251	FBpp0303631:c.[3480T>C]; FBpp0077752:c.[3480T>C]
2L mapping	397095	SNV	1	A	C	33	96.9697	33.7188	CDS: FBgn0031251, CDS: FBgn0031251, Exon: Exon, Gene: FBgn0031251, Misc. feature: contig 2L_1_8 1..50000(1), mRNA: FBgn0031251, mRNA: FBgn0031251	FBpp0077752:c.[3401T>G]; FBpp0303631:c.[3401T>G]	FBpp0077752:p.[Val1134Gly]; FBpp0303631:p.[Val1134Gly]
2L mapping	397136	SNV	1	T	A	40	100	34.425	CDS: FBgn0031251, CDS: FBgn0031251, Exon: Exon, Gene: FBgn0031251, Misc. feature: contig 2L_1_8 1..50000(1), mRNA: FBgn0031251, mRNA: FBgn0031251	FBpp0303631:c.[3360A>T]; FBpp0077752:c.[3360A>T]
2L mapping	397179	SNV	1	A	C	34	100	34.8529	CDS: FBgn0031251, CDS: FBgn0031251, Exon: Exon, Gene: FBgn0031251, Misc. feature: contig 2L_1_8 1..50000(1), mRNA: FBgn0031251, mRNA: FBgn0031251	FBpp0303631:c.[3317T>G]; FBpp0077752:c.[3317T>G]	FBpp0303631:p.[Phe1106Cys]; FBpp0077752:p.[Phe1106Cys]
2L mapping	397245	SNV	1	G	A	35	100	34.0571	CDS: FBgn0031251, CDS: FBgn0031251, Exon: Exon, Gene: FBgn0031251, Misc. feature: contig 2L_1_8 1..50000(1), mRNA: FBgn0031251, mRNA: FBgn0031251	FBpp0077752:c.[3251C>T]; FBpp0303631:c.[3251C>T]	FBpp0077752:p.[Thr1084Ile]; FBpp0303631:p.[Thr1084Ile]
2L mapping	397261	SNV	1	A	G	32	100	34.9688	CDS: FBgn0031251, CDS: FBgn0031251, Exon: Exon, Gene: FBgn0031251, Misc. feature: contig 2L_1_8 1..50000(1), mRNA: FBgn0031251, mRNA: FBgn0031251	FBpp0077752:c.[3235T>C]; FBpp0303631:c.[3235T>C]	FBpp0077752:p.[Ser1079Pro]; FBpp0303631:p.[Ser1079Pro]
2L mapping	397474	SNV	1	T	C	40	100	35.975	CDS: FBgn0031251, CDS: FBgn0031251, Exon: Exon, Gene: FBgn0031251, Misc. feature: contig 2L_1_8 1..50000(1), mRNA: FBgn0031251, mRNA: FBgn0031251	FBpp0303631:c.[3022A>G]; FBpp0077752:c.[3022A>G]	FBpp0303631:p.[Thr1008Ala]; FBpp0077752:p.[Thr1008Ala]
2L mapping	397541	SNV	1	A	T	38	100	33.6053	CDS: FBgn0031251, CDS: FBgn0031251, Exon: Exon, Gene: FBgn0031251, Misc. feature: contig 2L_1_8 1..50000(1), mRNA: FBgn0031251, mRNA: FBgn0031251	FBpp0303631:c.[2955T>A]; FBpp0077752:c.[2955T>A]
2L mapping	397579	SNV	1	G	T	35	97.1429	36.3529	CDS: FBgn0031251, CDS: FBgn0031251, Exon: Exon, Gene: FBgn0031251, Misc. feature: contig 2L_1_8 1..50000(1), mRNA: FBgn0031251, mRNA: FBgn0031251	FBpp0077752:c.[2917C>A]; FBpp0303631:c.[2917C>A]	FBpp0077752:p.[Gln973Lys]; FBpp0303631:p.[Gln973Lys]
2L mapping	398075	SNV	1	A	G	32	100	33.9688	CDS: FBgn0031251, CDS: FBgn0031251, Exon: Exon, Gene: FBgn0031251, Misc. feature: contig 2L_1_8 1..50000(1), mRNA: FBgn0031251, mRNA: FBgn0031251	FBpp0077752:c.[2421T>C]; FBpp0303631:c.[2421T>C]
2L mapping	398438	SNV	1	C	T	39	100	35.4359	CDS: FBgn0031251, CDS: FBgn0031251, Exon: Exon, Gene: FBgn0031251, Misc. feature: contig 2L_1_8 1..50000(1), mRNA: FBgn0031251, mRNA: FBgn0031251	FBpp0303631:c.[2058G>A]; FBpp0077752:c.[2058G>A]
2L mapping	398594	SNV	1	T	G	30	100	35.9	CDS: FBgn0031251, CDS: FBgn0031251, Exon: Exon, Gene: FBgn0031251, Misc. feature: contig 2L_1_8 1..50000(1), mRNA: FBgn0031251, mRNA: FBgn0031251	FBpp0303631:c.[1902A>C]; FBpp0077752:c.[1902A>C]
2L mapping	398834	SNV	1	C	T	47	100	35.0213	CDS: FBgn0031251, CDS: FBgn0031251, Exon: Exon, Gene: FBgn0031251, Misc. feature: contig 2L_1_8 1..50000(1), mRNA: FBgn0031251, mRNA: FBgn0031251	FBpp0077752:c.[1662G>A]; FBpp0303631:c.[1662G>A]
2L mapping	399556	SNV	1	G	A	32	100	34.1562	Gene: FBgn0031251, Misc. feature: contig 2L_1_8 1..50000(1)	FBpp0077752:c.[1629+292C>T]; FBpp0303631:c.[1629+292C>T]
2L mapping	402178	SNV	1	A	G	49	100	33.551	Exon: Exon, Gene: FBgn0031251, Misc. feature: contig 2L_1_9 1..50000(1), mRNA: FBgn0031251
2L mapping	402992	Deletion	1	T	-	36	91.6667	34.3333	Misc. feature: contig 2L_1_9 1..50000(1)
2L mapping	405939	SNV	1	T	C	47	100	36.5319	CDS: FBgn0003278, Exon: Exon, Gene: FBgn0003278, Misc. feature: contig 2L_1_9 1..50000(1), mRNA: FBgn0003278	FBpp0077714:c.1494T>C
2L mapping	408238	SNV	1	G	A	56	98.2143	36.1636	Exon: Exon, Gene: FBgn0264855, Misc. feature: contig 2L_1_9 1..50000(1), mRNA: FBgn0264855
2L mapping	408424	SNV	1	C	A	46	100	35.7609	Exon: Exon, Gene: FBgn0264855, Misc. feature: contig 2L_1_9 1..50000(1), mRNA: FBgn0264855
2L mapping	408551	SNV	1	T	A	44	100	34.4773	Exon: Exon, Gene: FBgn0264855, Misc. feature: contig 2L_1_9 1..50000(1), mRNA: FBgn0264855
2L mapping	408589	MNV	2	AT	TG	50	94	34.4787	Exon: Exon, Gene: FBgn0264855, Misc. feature: contig 2L_1_9 1..50000(1), mRNA: FBgn0264855
2L mapping	408731	SNV	1	C	T	47	100	34.9574	Exon: Exon, Gene: FBgn0264855, Misc. feature: contig 2L_1_9 1..50000(1), mRNA: FBgn0264855
2L mapping	408738	SNV	1	T	C	40	100	35.4	Exon: Exon, Gene: FBgn0264855, Misc. feature: contig 2L_1_9 1..50000(1), mRNA: FBgn0264855
2L mapping	408889	SNV	1	T	C	52	100	35.2692	Exon: Exon, Exon: Exon, Gene: FBgn0264855, Misc. feature: contig 2L_1_9 1..50000(1), mRNA: FBgn0264855, mRNA: FBgn0264855
2L mapping	409074	SNV	1	T	C	47	100	35.4468	Exon: Exon, Exon: Exon, Gene: FBgn0264855, Misc. feature: contig 2L_1_9 1..50000(1), mRNA: FBgn0264855, mRNA: FBgn0264855
2L mapping	409109	SNV	1	G	T	53	96.2264	34.4118	Exon: Exon, Exon: Exon, Gene: FBgn0264855, Misc. feature: contig 2L_1_9 1..50000(1), mRNA: FBgn0264855, mRNA: FBgn0264855
2L mapping	409123	Insertion	1	-	G	48	91.6667	34.2727	Exon: Exon, Exon: Exon, Gene: FBgn0264855, Misc. feature: contig 2L_1_9 1..50000(1), mRNA: FBgn0264855, mRNA: FBgn0264855
2L mapping	409132	SNV	1	T	A	48	100	35.1667	Exon: Exon, Exon: Exon, Gene: FBgn0264855, Misc. feature: contig 2L_1_9 1..50000(1), mRNA: FBgn0264855, mRNA: FBgn0264855
2L mapping	409223	SNV	1	G	A	39	100	36.3333	Exon: Exon, Exon: Exon, Gene: FBgn0264855, Misc. feature: contig 2L_1_9 1..50000(1), mRNA: FBgn0264855, mRNA: FBgn0264855
2L mapping	409409	SNV	1	A	G	27	100	33.1481	CDS: FBgn0264855, CDS: FBgn0264855, Exon: Exon, Exon: Exon, Gene: FBgn0264855, Misc. feature: contig 2L_1_9 1..50000(1), mRNA: FBgn0264855, mRNA: FBgn0264855	FBpp0088945:c.[2838T>C]; FBpp0088490:c.[2802T>C]
2L mapping	409745	SNV	1	G	A	38	97.3684	34.7568	Gene: FBgn0264855, Misc. feature: contig 2L_1_9 1..50000(1)	FBpp0088945:c.[2577-9C>T]; FBpp0088490:c.[2541-9C>T]
2L mapping	409965	SNV	1	A	G	42	100	34.1905	CDS: FBgn0264855, CDS: FBgn0264855, Exon: Exon, Gene: FBgn0264855, Misc. feature: contig 2L_1_9 1..50000(1), mRNA: FBgn0264855, mRNA: FBgn0264855	FBpp0088490:c.[2365T>C]; FBpp0088945:c.[2401T>C]
2L mapping	410655	SNV	1	C	T	49	100	35.7959	CDS: FBgn0264855, CDS: FBgn0264855, Exon: Exon, Gene: FBgn0264855, Misc. feature: contig 2L_1_9 1..50000(1), mRNA: FBgn0264855, mRNA: FBgn0264855	FBpp0088945:c.[1764G>A]; FBpp0088490:c.[1728G>A]
2L mapping	411092	SNV	1	A	C	28	100	32.4643	Gene: FBgn0264855, Misc. feature: contig 2L_1_9 1..50000(1)	FBpp0088490:c.[1323-32T>G]; FBpp0088945:c.[1359-32T>G]
2L mapping	411188	SNV	1	A	G	33	100	35.7576	CDS: FBgn0264855, CDS: FBgn0264855, Exon: Exon, Gene: FBgn0264855, Misc. feature: contig 2L_1_9 1..50000(1), mRNA: FBgn0264855, mRNA: FBgn0264855	FBpp0088945:c.[1299T>C]; FBpp0088490:c.[1263T>C]
2L mapping	412241	SNV	1	A	T	35	100	33.9429	Gene: FBgn0264855, Misc. feature: contig 2L_1_9 1..50000(1)	FBpp0088945:c.[313-4T>A]; FBpp0088490:c.[277-4T>A]
2L mapping	412294	SNV	1	T	G	37	100	35.2703	Gene: FBgn0264855, Misc. feature: contig 2L_1_9 1..50000(1)	FBpp0088945:c.[313-57A>C]; FBpp0088490:c.[277-57A>C]
2L mapping	412297	Deletion	1	T	-	37	100	32.2162	Gene: FBgn0264855, Misc. feature: contig 2L_1_9 1..50000(1)	FBpp0088945:c.[313-60delA]; FBpp0088490:c.[277-60delA]
2L mapping	412327	SNV	1	G	A	47	100	35.0426	Gene: FBgn0264855, Misc. feature: contig 2L_1_9 1..50000(1)	FBpp0088490:c.[277-90C>T]; FBpp0088945:c.[313-90C>T]
2L mapping	413130	Deletion	1	A	-	32	100	30.9062	Gene: FBgn0264855, Misc. feature: contig 2L_1_9 1..50000(1)	FBpp0088490:c.64+266delT
2L mapping	413132	SNV	1	A	G	32	100	32.4688	Gene: FBgn0264855, Misc. feature: contig 2L_1_9 1..50000(1)	FBpp0088490:c.64+264T>C
2L mapping	413136	Replacement	2	AT	C	38	84.2105	32.7031	Gene: FBgn0264855, Misc. feature: contig 2L_1_9 1..50000(1)	FBpp0088490:c.64+259_64+260delATinsG
2L mapping	413139	MNV	2	AC	CA	38	84.2105	32.0312	Gene: FBgn0264855, Misc. feature: contig 2L_1_9 1..50000(1)	FBpp0088490:c.64+256_64+257delGTinsTG
2L mapping	413527	SNV	1	G	T	35	100	33.0857	Exon: Exon, Gene: FBgn0264855, Misc. feature: contig 2L_1_9 1..50000(1), mRNA: FBgn0264855
2L mapping	413610	SNV	1	C	A	43	100	34.7209	Exon: Exon, Gene: FBgn0264855, Misc. feature: contig 2L_1_9 1..50000(1), mRNA: FBgn0264855
2L mapping	413638	SNV	1	C	T	42	100	36.4286	Exon: Exon, Gene: FBgn0264855, Misc. feature: contig 2L_1_9 1..50000(1), mRNA: FBgn0264855
2L mapping	413821	Deletion	2	AC	-	52	88.4615	34.1739	Gene: FBgn0264855, Misc. feature: contig 2L_1_9 1..50000(1)
2L mapping	413906	SNV	1	C	T	43	100	35.2791	Gene: FBgn0264855, Misc. feature: contig 2L_1_9 1..50000(1)
2L mapping	414058	SNV	1	T	G	37	94.5946	33.5429	Gene: FBgn0264855, Misc. feature: contig 2L_1_9 1..50000(1)
2L mapping	414294	SNV	1	C	T	37	100	33.1081	Gene: FBgn0264855, Misc. feature: contig 2L_1_9 1..50000(1)
2L mapping	414368	Deletion	2	AA	-	33	87.8788	32.5517	Gene: FBgn0264855, Misc. feature: contig 2L_1_9 1..50000(1)
2L mapping	414906	SNV	1	C	G	45	97.7778	36	Misc. feature: contig 2L_1_9 1..50000(1)
2L mapping	415250	SNV	1	A	T	47	100	33.8085	Exon: Exon, Gene: FBgn0263933, Misc. feature: contig 2L_1_9 1..50000(1), mRNA: FBgn0263933
2L mapping	415352	SNV	1	C	A	42	100	34.3571	Exon: Exon, Gene: FBgn0263933, Misc. feature: contig 2L_1_9 1..50000(1), mRNA: FBgn0263933
2L mapping	416140	SNV	1	T	C	35	100	35.9143	CDS: FBgn0263933, Exon: Exon, Gene: FBgn0263933, Misc. feature: contig 2L_1_9 1..50000(1), mRNA: FBgn0263933	FBpp0077715:c.687T>C
2L mapping	417295	SNV	1	G	C	34	100	35.2647	CDS: FBgn0263933, Exon: Exon, Gene: FBgn0263933, Misc. feature: contig 2L_1_9 1..50000(1), mRNA: FBgn0263933	FBpp0077715:c.1764G>C
2L mapping	418012	SNV	1	A	G	45	100	33.3333	Exon: Exon, Gene: FBgn0263933, Misc. feature: contig 2L_1_9 1..50000(1), mRNA: FBgn0263933
2L mapping	418046	SNV	1	G	C	38	100	34.2105	Exon: Exon, Gene: FBgn0263933, Misc. feature: contig 2L_1_9 1..50000(1), mRNA: FBgn0263933
2L mapping	418451	Insertion	1	-	T	43	90.6977	34.8462	Exon: Exon, Exon: Exon, Gene: FBgn0263933, Gene: FBgn0031252, Misc. feature: contig 2L_1_9 1..50000(1), mRNA: FBgn0263933, mRNA: FBgn0031252
2L mapping	418854	SNV	1	G	A	45	100	35.4889	CDS: FBgn0031252, Exon: Exon, Gene: FBgn0031252, Misc. feature: contig 2L_1_9 1..50000(1), mRNA: FBgn0031252	FBpp0077750:c.747C>T
2L mapping	418911	SNV	1	A	G	41	100	34.4634	CDS: FBgn0031252, Exon: Exon, Gene: FBgn0031252, Misc. feature: contig 2L_1_9 1..50000(1), mRNA: FBgn0031252	FBpp0077750:c.690T>C
2L mapping	419205	SNV	1	G	A	32	100	33.75	CDS: FBgn0031252, Exon: Exon, Gene: FBgn0031252, Misc. feature: contig 2L_1_9 1..50000(1), mRNA: FBgn0031252	FBpp0077750:c.396C>T
2L mapping	419254	SNV	1	C	T	34	100	34.7647	CDS: FBgn0031252, Exon: Exon, Gene: FBgn0031252, Misc. feature: contig 2L_1_9 1..50000(1), mRNA: FBgn0031252	FBpp0077750:c.347G>A	FBpp0077750:p.Gly116Glu
2L mapping	419582	SNV	1	C	A	46	100	34.1087	CDS: FBgn0031252, Exon: Exon, Gene: FBgn0031252, Misc. feature: contig 2L_1_9 1..50000(1), mRNA: FBgn0031252	FBpp0077750:c.19G>T	FBpp0077750:p.Val7Leu
2L mapping	419611	Deletion	1	T	-	50	90	30.5778	Exon: Exon, Gene: FBgn0031252, Misc. feature: contig 2L_1_9 1..50000(1), mRNA: FBgn0031252
2L mapping	419617	SNV	1	T	A	50	96	30.1875	Exon: Exon, Gene: FBgn0031252, Misc. feature: contig 2L_1_9 1..50000(1), mRNA: FBgn0031252
2L mapping	419636	SNV	1	C	G	47	97.8723	33.7826	Exon: Exon, Gene: FBgn0031252, Misc. feature: contig 2L_1_9 1..50000(1), mRNA: FBgn0031252
2L mapping	419704	Deletion	1	T	-	43	83.7209	34.1389	Misc. feature: contig 2L_1_9 1..50000(1)
2L mapping	419719	SNV	1	T	G	43	100	34.2326	Misc. feature: contig 2L_1_9 1..50000(1)
2L mapping	419755	SNV	1	A	G	41	100	34.3171	Misc. feature: contig 2L_1_9 1..50000(1)
2L mapping	419788	SNV	1	G	C	47	100	34.2979	Misc. feature: contig 2L_1_9 1..50000(1)
2L mapping	419919	SNV	1	C	T	31	100	35.6452	Misc. feature: contig 2L_1_9 1..50000(1)
2L mapping	420177	SNV	1	A	C	31	100	35.7097	Gene: FBgn0002593, Misc. feature: contig 2L_1_9 1..50000(1)	FBpp0304265:c.[72+31A>C]; FBpp0077716:c.[72+31A>C]
2L mapping	420569	SNV	1	G	A	37	100	34.1351	Exon: Exon, Exon: Exon, Gene: FBgn0002593, Misc. feature: contig 2L_1_9 1..50000(1), mRNA: FBgn0002593, mRNA: FBgn0002593
2L mapping	420684	Deletion	3	AGA	-	38	92.1053	32.8	Exon: Exon, Exon: Exon, Gene: FBgn0002593, Misc. feature: contig 2L_1_9 1..50000(1), mRNA: FBgn0002593, mRNA: FBgn0002593
2L mapping	420703	Deletion	3	ATT	-	41	95.122	34.0513	Exon: Exon, Gene: FBgn0002593, Misc. feature: contig 2L_1_9 1..50000(1), mRNA: FBgn0002593
2L mapping	420731	SNV	1	G	A	50	100	33.7	Exon: Exon, Gene: FBgn0002593, Misc. feature: contig 2L_1_9 1..50000(1), mRNA: FBgn0002593
2L mapping	420794	SNV	1	T	C	44	100	35.2273	Exon: Exon, Gene: FBgn0002593, Misc. feature: contig 2L_1_9 1..50000(1), mRNA: FBgn0002593
2L mapping	420836	Insertion	1	-	A	40	100	34.35	Exon: Exon, Gene: FBgn0002593, Misc. feature: contig 2L_1_9 1..50000(1), mRNA: FBgn0002593
2L mapping	420887	Insertion	1	-	T	40	77.5	33.7742	Misc. feature: contig 2L_1_9 1..50000(1)
2L mapping	421689	SNV	1	G	A	46	100	36.1739	Misc. feature: contig 2L_1_9 1..50000(1)
2L mapping	421883	SNV	1	T	C	47	100	35.1064	CDS: FBgn0031254, Exon: Exon, Gene: FBgn0031254, Misc. feature: contig 2L_1_9 1..50000(1), mRNA: FBgn0031254	FBpp0077717:c.84T>C
2L mapping	421960	SNV	1	A	G	47	100	35.5745	CDS: FBgn0031254, Exon: Exon, Gene: FBgn0031254, Misc. feature: contig 2L_1_9 1..50000(1), mRNA: FBgn0031254	FBpp0077717:c.161A>G	FBpp0077717:p.Asp54Gly
2L mapping	422457	SNV	1	T	A	36	100	35.8611	Exon: Exon, Gene: FBgn0031254, Misc. feature: contig 2L_1_9 1..50000(1), mRNA: FBgn0031254
2L mapping	422475	SNV	1	A	T	40	100	35.5	Exon: Exon, Gene: FBgn0031254, Misc. feature: contig 2L_1_9 1..50000(1), mRNA: FBgn0031254
2L mapping	422846	SNV	1	A	G	47	100	35.2766	Misc. feature: contig 2L_1_9 1..50000(1)
2L mapping	422848	SNV	1	A	G	47	100	34.3617	Misc. feature: contig 2L_1_9 1..50000(1)
2L mapping	423051	SNV	1	A	T	40	100	35.1	Exon: Exon, Gene: FBgn0031255, Misc. feature: contig 2L_1_9 1..50000(1), mRNA: FBgn0031255
2L mapping	423177	SNV	1	T	C	44	100	34.2727	Exon: Exon, Gene: FBgn0031255, Misc. feature: contig 2L_1_9 1..50000(1), mRNA: FBgn0031255
2L mapping	423194	SNV	1	A	T	42	97.619	35.5122	Exon: Exon, Gene: FBgn0031255, Misc. feature: contig 2L_1_9 1..50000(1), mRNA: FBgn0031255
2L mapping	423269	Deletion	1	A	-	40	80	31.5312	Exon: Exon, Gene: FBgn0031255, Misc. feature: contig 2L_1_9 1..50000(1), mRNA: FBgn0031255
2L mapping	423273	MNV	2	GA	TT	32	100	34.0156	Exon: Exon, Gene: FBgn0031255, Misc. feature: contig 2L_1_9 1..50000(1), mRNA: FBgn0031255
2L mapping	423406	Deletion	1	T	-	37	81.0811	34.6667	Exon: Exon, Gene: FBgn0031255, Misc. feature: contig 2L_1_9 1..50000(1), mRNA: FBgn0031255
2L mapping	423835	SNV	1	A	C	36	100	33.1667	CDS: FBgn0031255, Exon: Exon, Gene: FBgn0031255, Misc. feature: contig 2L_1_9 1..50000(1), mRNA: FBgn0031255	FBpp0077718:c.384A>C
2L mapping	423935	SNV	1	C	T	25	100	35.36	CDS: FBgn0031255, Exon: Exon, Gene: FBgn0031255, Misc. feature: contig 2L_1_9 1..50000(1), mRNA: FBgn0031255	FBpp0077718:c.414C>T
2L mapping	424082	SNV	1	G	T	26	100	34.2308	CDS: FBgn0031255, Exon: Exon, Gene: FBgn0031255, Misc. feature: contig 2L_1_9 1..50000(1), mRNA: FBgn0031255	FBpp0077718:c.561G>T
2L mapping	424139	SNV	1	A	G	30	100	34.3	CDS: FBgn0031255, Exon: Exon, Gene: FBgn0031255, Misc. feature: contig 2L_1_9 1..50000(1), mRNA: FBgn0031255	FBpp0077718:c.618A>G
2L mapping	424145	SNV	1	T	A	28	100	34.5	CDS: FBgn0031255, Exon: Exon, Gene: FBgn0031255, Misc. feature: contig 2L_1_9 1..50000(1), mRNA: FBgn0031255	FBpp0077718:c.624T>A
2L mapping	424235	SNV	1	C	T	32	100	33.8438	CDS: FBgn0031255, Exon: Exon, Gene: FBgn0031255, Misc. feature: contig 2L_1_9 1..50000(1), mRNA: FBgn0031255	FBpp0077718:c.714C>T
2L mapping	424262	SNV	1	A	G	32	100	35.2812	CDS: FBgn0031255, Exon: Exon, Gene: FBgn0031255, Misc. feature: contig 2L_1_9 1..50000(1), mRNA: FBgn0031255	FBpp0077718:c.741A>G
2L mapping	424295	SNV	1	T	C	33	100	35.0606	CDS: FBgn0031255, Exon: Exon, Gene: FBgn0031255, Misc. feature: contig 2L_1_9 1..50000(1), mRNA: FBgn0031255	FBpp0077718:c.774T>C
2L mapping	424394	SNV	1	C	T	28	96.4286	35.8519	CDS: FBgn0031255, Exon: Exon, Gene: FBgn0031255, Misc. feature: contig 2L_1_9 1..50000(1), mRNA: FBgn0031255	FBpp0077718:c.873C>T
2L mapping	424514	SNV	1	T	A	49	100	34.3469	CDS: FBgn0031255, Exon: Exon, Gene: FBgn0031255, Misc. feature: contig 2L_1_9 1..50000(1), mRNA: FBgn0031255	FBpp0077718:c.993T>A
2L mapping	424520	SNV	1	C	G	49	100	36.4694	CDS: FBgn0031255, Exon: Exon, Gene: FBgn0031255, Misc. feature: contig 2L_1_9 1..50000(1), mRNA: FBgn0031255	FBpp0077718:c.999C>G
2L mapping	424681	SNV	1	C	T	38	97.3684	34.8649	CDS: FBgn0031255, Exon: Exon, Gene: FBgn0031255, Misc. feature: contig 2L_1_9 1..50000(1), mRNA: FBgn0031255	FBpp0077718:c.1160C>T	FBpp0077718:p.Ala387Val
2L mapping	424778	SNV	1	C	G	40	100	35.175	Gene: FBgn0031255, Misc. feature: contig 2L_1_9 1..50000(1)	FBpp0077718:c.1242+15C>G
2L mapping	425105	SNV	1	T	C	40	100	35.4	CDS: FBgn0031255, Exon: Exon, Gene: FBgn0031255, Misc. feature: contig 2L_1_9 1..50000(1), mRNA: FBgn0031255	FBpp0077718:c.1464T>C
2L mapping	425849	SNV	1	C	T	39	100	35.7179	Misc. feature: contig 2L_1_9 1..50000(1)
2L mapping	425876	SNV	1	G	A	41	100	35	Misc. feature: contig 2L_1_9 1..50000(1)
2L mapping	426274	SNV	1	G	C	15	86.6667	35.2308	Misc. feature: contig 2L_1_9 1..50000(1)
2L mapping	426674	Deletion	1	T	-	34	100	32.9706	Misc. feature: contig 2L_1_9 1..50000(1)
2L mapping	426684	SNV	1	G	A	39	94.8718	31.6757	Misc. feature: contig 2L_1_9 1..50000(1)
2L mapping	426698	SNV	1	G	A	40	100	31.375	Misc. feature: contig 2L_1_9 1..50000(1)
2L mapping	426734	SNV	1	G	A	41	100	35.4634	Misc. feature: contig 2L_1_9 1..50000(1)
2L mapping	426747	SNV	1	T	C	40	97.5	34.5641	Misc. feature: contig 2L_1_9 1..50000(1)
2L mapping	426832	SNV	1	C	A	28	100	32.5714	Misc. feature: contig 2L_1_9 1..50000(1)
2L mapping	426871	SNV	1	A	C	28	100	32.6786	Misc. feature: contig 2L_1_9 1..50000(1)
2L mapping	426928	Insertion	5	-	TGAGA	25	68	35.3294	Misc. feature: contig 2L_1_9 1..50000(1)
2L mapping	428272	SNV	1	A	G	33	100	34.9697	Misc. feature: contig 2L_1_9 1..50000(1)
2L mapping	428423	SNV	1	C	T	40	100	34.15	Misc. feature: contig 2L_1_9 1..50000(1)
2L mapping	429660	Insertion	3	-	CAA	42	66.6667	35.619	Misc. feature: contig 2L_1_9 1..50000(1)
2L mapping	429739	Deletion	2	AA	-	41	70.7317	28.5172	Misc. feature: contig 2L_1_9 1..50000(1)
2L mapping	429851	SNV	1	C	T	33	100	34.9394	Misc. feature: contig 2L_1_9 1..50000(1)
2L mapping	430672	SNV	1	A	T	53	100	36.6604	Misc. feature: contig 2L_1_9 1..50000(1)
2L mapping	431370	SNV	1	A	G	41	100	33.8537	Exon: Exon, Exon: Exon, Gene: FBgn0004583, Misc. feature: contig 2L_1_9 1..50000(1), mRNA: FBgn0004583, mRNA: FBgn0004583
2L mapping	431420	SNV	1	C	A	44	100	36.0682	Exon: Exon, Exon: Exon, Gene: FBgn0004583, Misc. feature: contig 2L_1_9 1..50000(1), mRNA: FBgn0004583, mRNA: FBgn0004583
2L mapping	431795	SNV	1	T	G	42	100	34.119	Exon: Exon, Exon: Exon, Gene: FBgn0004583, Misc. feature: contig 2L_1_9 1..50000(1), mRNA: FBgn0004583, mRNA: FBgn0004583
2L mapping	431799	SNV	1	T	G	42	100	36.0238	Exon: Exon, Exon: Exon, Gene: FBgn0004583, Misc. feature: contig 2L_1_9 1..50000(1), mRNA: FBgn0004583, mRNA: FBgn0004583
2L mapping	432313	Insertion	1	-	T	42	54.7619	35.3478	Gene: FBgn0004583, Misc. feature: contig 2L_1_9 1..50000(1)
2L mapping	432453	SNV	1	C	A	52	96.1538	33.42	Gene: FBgn0004583, Misc. feature: contig 2L_1_9 1..50000(1)
2L mapping	432716	SNV	1	G	C	42	100	34.7381	Gene: FBgn0004583, Misc. feature: contig 2L_1_9 1..50000(1)
2L mapping	433086	Replacement	3	TTG	C	34	100	36.1569	Gene: FBgn0004583, Misc. feature: contig 2L_1_9 1..50000(1)
2L mapping	433090	MNV	2	TC	CA	34	100	35.25	Gene: FBgn0004583, Misc. feature: contig 2L_1_9 1..50000(1)
2L mapping	433451	SNV	1	C	T	41	97.561	35.1	Gene: FBgn0004583, Misc. feature: contig 2L_1_9 1..50000(1)
2L mapping	434997	SNV	1	A	G	44	100	35.7727	Gene: FBgn0004583, Misc. feature: contig 2L_1_9 1..50000(1)
2L mapping	435397	SNV	1	A	T	37	97.2973	33.5278	Gene: FBgn0004583, Misc. feature: contig 2L_1_9 1..50000(1)
2L mapping	435431	SNV	1	G	C	38	100	35.6579	Gene: FBgn0004583, Misc. feature: contig 2L_1_9 1..50000(1)
2L mapping	436023	SNV	1	A	C	27	100	33.9259	Gene: FBgn0004583, Misc. feature: contig 2L_1_9 1..50000(1)
2L mapping	436060	MNV	2	AC	GT	33	96.9697	34.2969	Gene: FBgn0004583, Misc. feature: contig 2L_1_9 1..50000(1)
2L mapping	436179	SNV	1	C	T	32	100	34.6562	Gene: FBgn0004583, Misc. feature: contig 2L_1_9 1..50000(1)
2L mapping	436207	SNV	1	T	A	31	96.7742	33.7333	Gene: FBgn0004583, Misc. feature: contig 2L_1_9 1..50000(1)
2L mapping	436286	SNV	1	C	G	33	100	33.9394	Gene: FBgn0004583, Misc. feature: contig 2L_1_9 1..50000(1)
2L mapping	436551	SNV	1	A	G	36	100	35.0833	Gene: FBgn0004583, Misc. feature: contig 2L_1_9 1..50000(1)
2L mapping	436671	SNV	1	C	G	43	100	36.1628	Gene: FBgn0004583, Misc. feature: contig 2L_1_9 1..50000(1)
2L mapping	436747	SNV	1	C	T	46	100	35.1304	Gene: FBgn0004583, Misc. feature: contig 2L_1_9 1..50000(1)
2L mapping	436900	SNV	1	T	C	50	100	34.5	Gene: FBgn0004583, Misc. feature: contig 2L_1_9 1..50000(1)
2L mapping	437215	SNV	1	A	G	53	100	35.4717	Gene: FBgn0004583, Misc. feature: contig 2L_1_9 1..50000(1)
2L mapping	437253	SNV	1	C	A	44	100	35.6818	Gene: FBgn0004583, Misc. feature: contig 2L_1_9 1..50000(1)
2L mapping	437276	Insertion	6	-	TTTGTT	38	71.0526	35.3704	Gene: FBgn0004583, Misc. feature: contig 2L_1_9 1..50000(1)
2L mapping	437487	SNV	1	T	C	48	100	35.4583	Gene: FBgn0004583, Misc. feature: contig 2L_1_9 1..50000(1)
2L mapping	437495	SNV	1	G	C	42	100	35.4524	Gene: FBgn0004583, Misc. feature: contig 2L_1_9 1..50000(1)
2L mapping	437806	SNV	1	C	G	38	100	33.3158	Gene: FBgn0004583, Misc. feature: contig 2L_1_9 1..50000(1)
2L mapping	438020	SNV	1	T	C	24	100	33.7917	Gene: FBgn0004583, Misc. feature: contig 2L_1_9 1..50000(1)
2L mapping	438155	SNV	1	A	C	37	100	33.973	Gene: FBgn0004583, Misc. feature: contig 2L_1_9 1..50000(1)
2L mapping	438167	SNV	1	T	G	39	100	32.3333	Gene: FBgn0004583, Misc. feature: contig 2L_1_9 1..50000(1)
2L mapping	438747	Deletion	1	G	-	37	89.1892	33.3939	Gene: FBgn0004583, Misc. feature: contig 2L_1_9 1..50000(1)	FBpp0077719:c.[238+20delG]; FBpp0302878:c.[238+20delG]
2L mapping	439486	SNV	1	C	T	45	100	34.8444	Gene: FBgn0004583, Misc. feature: contig 2L_1_9 1..50000(1)	FBpp0302878:c.[238+759C>T]; FBpp0077719:c.[238+759C>T]
2L mapping	439541	SNV	1	T	A	40	100	35.75	Misc. RNA: FBgn0263870, Exon: Exon, Gene: FBgn0004583, Gene: FBgn0263870, Misc. feature: contig 2L_1_9 1..50000(1)	FBpp0302878:c.[238+814T>A]; FBpp0077719:c.[238+814T>A]
2L mapping	439568	SNV	1	G	A	35	100	35.0571	Misc. RNA: FBgn0263870, Exon: Exon, Gene: FBgn0004583, Gene: FBgn0263870, Misc. feature: contig 2L_1_9 1..50000(1)	FBpp0302878:c.[238+841G>A]; FBpp0077719:c.[238+841G>A]
2L mapping	439803	SNV	1	T	C	39	100	35.9487	Misc. RNA: FBgn0263870, Exon: Exon, Gene: FBgn0004583, Gene: FBgn0263870, Misc. feature: contig 2L_1_9 1..50000(1)	FBpp0302878:c.[238+1076T>C]; FBpp0077719:c.[238+1076T>C]
2L mapping	440085	SNV	1	C	A	42	100	36.1429	Misc. RNA: FBgn0263870, Exon: Exon, Gene: FBgn0004583, Gene: FBgn0263870, Misc. feature: contig 2L_1_9 1..50000(1)	FBpp0077719:c.[238+1358C>A]; FBpp0302878:c.[238+1358C>A]
2L mapping	440843	Deletion	1	T	-	45	95.5556	31.1163	Gene: FBgn0004583, Misc. feature: contig 2L_1_9 1..50000(1)	FBpp0077719:c.[238+2116delT]; FBpp0302878:c.[238+2116delT]
2L mapping	440851	Deletion	1	T	-	47	82.9787	33.4615	Gene: FBgn0004583, Misc. feature: contig 2L_1_9 1..50000(1)	FBpp0302878:c.[238+2124delT]; FBpp0077719:c.[238+2124delT]
2L mapping	440876	SNV	1	C	A	59	98.3051	31.1034	Gene: FBgn0004583, Misc. feature: contig 2L_1_9 1..50000(1)	FBpp0302878:c.[238+2149C>A]; FBpp0077719:c.[238+2149C>A]
2L mapping	441029	Deletion	9	TGGACTTTG	-	45	40	34.5	Gene: FBgn0004583, Misc. feature: contig 2L_1_9 1..50000(1)	FBpp0077719:c.[239-2053_239-2045delTGGACTTTG]; FBpp0302878:c.[239-2053_239-2045delTGGACTTTG]
2L mapping	441107	SNV	1	T	A	43	100	33.8372	Gene: FBgn0004583, Misc. feature: contig 2L_1_9 1..50000(1)	FBpp0302878:c.[239-1975T>A]; FBpp0077719:c.[239-1975T>A]
2L mapping	441169	SNV	1	C	T	41	100	35.1951	Gene: FBgn0004583, Misc. feature: contig 2L_1_9 1..50000(1)	FBpp0302878:c.[239-1913C>T]; FBpp0077719:c.[239-1913C>T]
2L mapping	441196	Insertion	2	-	TA	43	74.4186	34.375	Gene: FBgn0004583, Misc. feature: contig 2L_1_9 1..50000(1)	FBpp0077719:c.[239-1887_239-1886insTA]; FBpp0302878:c.[239-1887_239-1886insTA]
2L mapping	441794	SNV	1	C	T	44	100	32.8636	Gene: FBgn0004583, Misc. feature: contig 2L_1_9 1..50000(1)	FBpp0077719:c.[239-1288C>T]; FBpp0302878:c.[239-1288C>T]
2L mapping	441876	SNV	1	A	T	34	97.0588	35.3333	Gene: FBgn0004583, Misc. feature: contig 2L_1_9 1..50000(1)	FBpp0077719:c.[239-1206A>T]; FBpp0302878:c.[239-1206A>T]
2L mapping	442088	SNV	1	A	T	36	100	36.3889	Gene: FBgn0004583, Misc. feature: contig 2L_1_9 1..50000(1)	FBpp0302878:c.[239-994A>T]; FBpp0077719:c.[239-994A>T]
2L mapping	442101	SNV	1	C	T	41	100	35.9024	Gene: FBgn0004583, Misc. feature: contig 2L_1_9 1..50000(1)	FBpp0077719:c.[239-981C>T]; FBpp0302878:c.[239-981C>T]
2L mapping	442260	SNV	1	G	C	31	100	36.6129	Gene: FBgn0004583, Misc. feature: contig 2L_1_9 1..50000(1)	FBpp0077719:c.[239-822G>C]; FBpp0302878:c.[239-822G>C]
2L mapping	442542	SNV	1	T	G	20	95	33.7895	Gene: FBgn0004583, Misc. feature: contig 2L_1_9 1..50000(1)	FBpp0302878:c.[239-540T>G]; FBpp0077719:c.[239-540T>G]
2L mapping	443558	SNV	1	T	C	43	100	35.093	CDS: FBgn0004583, CDS: FBgn0004583, Exon: Exon, Gene: FBgn0004583, Misc. feature: contig 2L_1_9 1..50000(1), mRNA: FBgn0004583, mRNA: FBgn0004583	FBpp0302878:c.[651T>C]; FBpp0077719:c.[651T>C]
2L mapping	444596	SNV	1	C	T	43	100	34.8372	CDS: FBgn0004583, CDS: FBgn0004583, Exon: Exon, Gene: FBgn0004583, Misc. feature: contig 2L_1_9 1..50000(1), mRNA: FBgn0004583, mRNA: FBgn0004583	FBpp0077719:c.[1689C>T]; FBpp0302878:c.[1689C>T]
2L mapping	444671	SNV	1	A	T	39	100	34.1538	CDS: FBgn0004583, CDS: FBgn0004583, Exon: Exon, Gene: FBgn0004583, Misc. feature: contig 2L_1_9 1..50000(1), mRNA: FBgn0004583, mRNA: FBgn0004583	FBpp0077719:c.[1764A>T]; FBpp0302878:c.[1764A>T]
2L mapping	444713	SNV	1	G	A	43	100	33.6744	CDS: FBgn0004583, CDS: FBgn0004583, Exon: Exon, Gene: FBgn0004583, Misc. feature: contig 2L_1_9 1..50000(1), mRNA: FBgn0004583, mRNA: FBgn0004583	FBpp0302878:c.[1806G>A]; FBpp0077719:c.[1806G>A]
2L mapping	444985	SNV	1	A	C	33	100	33.7273	CDS: FBgn0004583, CDS: FBgn0004583, Exon: Exon, Gene: FBgn0004583, Misc. feature: contig 2L_1_9 1..50000(1), mRNA: FBgn0004583, mRNA: FBgn0004583	FBpp0077719:c.[2078A>C]; FBpp0302878:c.[2078A>C]	FBpp0077719:p.[Gln693Pro]; FBpp0302878:p.[Gln693Pro]
2L mapping	445199	SNV	1	T	C	28	100	36.0714	CDS: FBgn0004583, CDS: FBgn0004583, Exon: Exon, Gene: FBgn0004583, Misc. feature: contig 2L_1_9 1..50000(1), mRNA: FBgn0004583, mRNA: FBgn0004583	FBpp0077719:c.[2292T>C]; FBpp0302878:c.[2292T>C]
2L mapping	445373	SNV	1	A	G	19	100	34.3684	CDS: FBgn0004583, CDS: FBgn0004583, Exon: Exon, Gene: FBgn0004583, Misc. feature: contig 2L_1_9 1..50000(1), mRNA: FBgn0004583, mRNA: FBgn0004583	FBpp0302878:c.[2466A>G]; FBpp0077719:c.[2466A>G]
2L mapping	445467	SNV	1	A	C	30	100	32.5667	CDS: FBgn0004583, CDS: FBgn0004583, Exon: Exon, Gene: FBgn0004583, Misc. feature: contig 2L_1_9 1..50000(1), mRNA: FBgn0004583, mRNA: FBgn0004583	FBpp0077719:c.[2560A>C]; FBpp0302878:c.[2560A>C]
2L mapping	445650	Deletion	6	CCGCAC	-	22	68.1818	32.6667	CDS: FBgn0004583, CDS: FBgn0004583, Exon: Exon, Gene: FBgn0004583, Misc. feature: contig 2L_1_9 1..50000(1), mRNA: FBgn0004583, mRNA: FBgn0004583	FBpp0077719:c.[2743_2748delCCGCAC]; FBpp0302878:c.[2743_2748delCCGCAC]	FBpp0077719:p.[Pro915_His916del]; FBpp0302878:p.[Pro915_His916del]
2L mapping	446630	Deletion	1	T	-	36	100	31.6944	Gene: FBgn0004583, Misc. feature: contig 2L_1_9 1..50000(1)	FBpp0302878:c.[3677-12delT]; FBpp0077719:c.[3677-12delT]
2L mapping	447525	SNV	1	A	G	39	100	34.4359	Exon: Exon, Gene: FBgn0004583, Misc. feature: contig 2L_1_9 1..50000(1), mRNA: FBgn0004583, mRNA: FBgn0004583
2L mapping	448655	SNV	1	C	T	60	96.6667	33.7586	Exon: Exon, Exon: Exon, Gene: FBgn0004583, Gene: FBgn0015924, Misc. feature: contig 2L_1_9 1..50000(1), mRNA: FBgn0004583, mRNA: FBgn0004583, mRNA: FBgn0015924, mRNA: FBgn0015924
2L mapping	448809	Deletion	1	A	-	42	61.9048	30.5	Exon: Exon, Exon: Exon, Gene: FBgn0015924, Misc. feature: contig 2L_1_9 1..50000(1), mRNA: FBgn0015924, mRNA: FBgn0015924, mRNA: FBgn0015924, mRNA: FBgn0015924, mRNA: FBgn0015924
2L mapping	448813	SNV	1	T	G	39	74.359	31.8966	Exon: Exon, Exon: Exon, Gene: FBgn0015924, Misc. feature: contig 2L_1_9 1..50000(1), mRNA: FBgn0015924, mRNA: FBgn0015924, mRNA: FBgn0015924, mRNA: FBgn0015924, mRNA: FBgn0015924
2L mapping	449057	SNV	1	C	T	50	100	35.7	CDS: FBgn0015924, CDS: FBgn0015924, CDS: FBgn0015924, CDS: FBgn0015924, CDS: FBgn0015924, Exon: Exon, Exon: Exon, Gene: FBgn0015924, Misc. feature: contig 2L_1_9 1..50000(1), mRNA: FBgn0015924, mRNA: FBgn0015924, mRNA: FBgn0015924, mRNA: FBgn0015924, mRNA: FBgn0015924	FBpp0077748:c.[1440G>A]; FBpp0303674:c.[1440G>A]; FBpp0077747:c.[1440G>A]; FBpp0303675:c.[1440G>A]; FBpp0293283:c.[1440G>A]
2L mapping	449060	SNV	1	C	A	52	100	35.4038	CDS: FBgn0015924, CDS: FBgn0015924, CDS: FBgn0015924, CDS: FBgn0015924, CDS: FBgn0015924, Exon: Exon, Exon: Exon, Gene: FBgn0015924, Misc. feature: contig 2L_1_9 1..50000(1), mRNA: FBgn0015924, mRNA: FBgn0015924, mRNA: FBgn0015924, mRNA: FBgn0015924, mRNA: FBgn0015924	FBpp0077747:c.[1437G>T]; FBpp0077748:c.[1437G>T]; FBpp0303675:c.[1437G>T]; FBpp0293283:c.[1437G>T]; FBpp0303674:c.[1437G>T]
2L mapping	449188	SNV	1	G	T	46	100	35.8043	Gene: FBgn0015924, Misc. feature: contig 2L_1_9 1..50000(1)	FBpp0303674:c.[1327-18C>A]; FBpp0293283:c.[1327-18C>A]; FBpp0077748:c.[1327-18C>A]; FBpp0077747:c.[1327-18C>A]; FBpp0303675:c.[1327-18C>A]
2L mapping	449931	SNV	1	A	T	33	100	33.2424	CDS: FBgn0015924, CDS: FBgn0015924, CDS: FBgn0015924, CDS: FBgn0015924, CDS: FBgn0015924, Exon: Exon, Gene: FBgn0015924, Misc. feature: contig 2L_1_9 1..50000(1), mRNA: FBgn0015924, mRNA: FBgn0015924, mRNA: FBgn0015924, mRNA: FBgn0015924, mRNA: FBgn0015924	FBpp0303675:c.[739T>A]; FBpp0293283:c.[739T>A]; FBpp0077747:c.[739T>A]; FBpp0077748:c.[739T>A]; FBpp0303674:c.[739T>A]	FBpp0303675:p.[Ser247Thr]; FBpp0293283:p.[Ser247Thr]; FBpp0077747:p.[Ser247Thr]; FBpp0077748:p.[Ser247Thr]; FBpp0303674:p.[Ser247Thr]
2L mapping	450585	Insertion	1	-	T	43	39.5349	33.4118	Gene: FBgn0015924, Misc. feature: contig 2L_1_10 1..50000(1)	FBpp0077748:c.[130-45_130-44insA]; FBpp0303675:c.[130-45_130-44insA]; FBpp0303674:c.[130-45_130-44insA]; FBpp0293283:c.[130-45_130-44insA]; FBpp0077747:c.[130-45_130-44insA]
2L mapping	451184	SNV	1	A	C	34	100	35	Gene: FBgn0015924, Misc. feature: contig 2L_1_10 1..50000(1)
2L mapping	451472	SNV	1	T	G	40	100	35.8	Gene: FBgn0015924, Misc. feature: contig 2L_1_10 1..50000(1)
2L mapping	452159	SNV	1	T	G	43	100	34.5349	Gene: FBgn0015924, Misc. feature: contig 2L_1_10 1..50000(1)
2L mapping	452295	SNV	1	A	T	32	78.125	36.08	Gene: FBgn0015924, Misc. feature: contig 2L_1_10 1..50000(1)
2L mapping	452581	SNV	1	T	A	50	100	35.76	Exon: Exon, Exon: Exon, Exon: Exon, Gene: FBgn0015924, Misc. feature: contig 2L_1_10 1..50000(1), mRNA: FBgn0015924, mRNA: FBgn0015924, mRNA: FBgn0015924, mRNA: FBgn0015924
2L mapping	452796	SNV	1	A	T	43	100	33.7907	Exon: Exon, Gene: FBgn0015924, Misc. feature: contig 2L_1_10 1..50000(1), mRNA: FBgn0015924
2L mapping	455639	SNV	1	C	A	40	92.5	35.4054	Exon: Exon, Gene: FBgn0031257, Misc. feature: contig 2L_1_10 1..50000(1), mRNA: FBgn0031257, mRNA: FBgn0031257, mRNA: FBgn0031257
2L mapping	455661	SNV	1	G	T	43	100	35.4186	Exon: Exon, Gene: FBgn0031257, Misc. feature: contig 2L_1_10 1..50000(1), mRNA: FBgn0031257, mRNA: FBgn0031257, mRNA: FBgn0031257
2L mapping	455768	SNV	1	C	A	36	100	36.2222	Exon: Exon, Gene: FBgn0031257, Misc. feature: contig 2L_1_10 1..50000(1), mRNA: FBgn0031257, mRNA: FBgn0031257, mRNA: FBgn0031257
2L mapping	455960	SNV	1	C	T	43	100	34.9767	Gene: FBgn0031257, Misc. feature: contig 2L_1_10 1..50000(1)	FBpp0303673:c.[28-126C>T]; FBpp0303672:c.[28-126C>T]; FBpp0077721:c.[28-126C>T]
2L mapping	456595	SNV	1	T	C	42	100	34.0714	CDS: FBgn0031257, CDS: FBgn0031257, CDS: FBgn0031257, Exon: Exon, Gene: FBgn0031257, Misc. feature: contig 2L_1_10 1..50000(1), mRNA: FBgn0031257, mRNA: FBgn0031257, mRNA: FBgn0031257	FBpp0303672:c.[402T>C]; FBpp0303673:c.[402T>C]; FBpp0077721:c.[402T>C]
2L mapping	456734	Deletion	4	GTTC	-	37	70.2703	34.4615	Gene: FBgn0031257, Misc. feature: contig 2L_1_10 1..50000(1)	FBpp0303673:c.[536+5_536+8delGTTC]; FBpp0303672:c.[536+5_536+8delGTTC]; FBpp0077721:c.[536+5_536+8delGTTC]
2L mapping	457325	SNV	1	C	T	43	97.6744	33.7857	CDS: FBgn0031257, CDS: FBgn0031257, CDS: FBgn0031257, Exon: Exon, Exon: Exon, Gene: FBgn0031257, Misc. feature: contig 2L_1_10 1..50000(1), mRNA: FBgn0031257, mRNA: FBgn0031257, mRNA: FBgn0031257	FBpp0077721:c.[1065C>T]; FBpp0303672:c.[990C>T]; FBpp0303673:c.[1065C>T]
2L mapping	457362	SNV	1	C	T	37	100	35.8108	Gene: FBgn0031257, Misc. feature: contig 2L_1_10 1..50000(1)	FBpp0303672:c.[1003+24C>T]; FBpp0077721:c.[1078+24C>T]; FBpp0303673:c.[1078+24C>T]
2L mapping	457661	SNV	1	C	T	34	100	35.0882	CDS: FBgn0031257, CDS: FBgn0031257, CDS: FBgn0031257, Exon: Exon, Exon: Exon, Gene: FBgn0031257, Misc. feature: contig 2L_1_10 1..50000(1), mRNA: FBgn0031257, mRNA: FBgn0031257, mRNA: FBgn0031257	FBpp0077721:c.[1275C>T]; FBpp0303672:c.[1200C>T]; FBpp0303673:c.[1288C>T]
2L mapping	458285	SNV	1	T	C	36	100	34.8889	CDS: FBgn0031257, CDS: FBgn0031257, Exon: Exon, Exon: Exon, Gene: FBgn0031257, Misc. feature: contig 2L_1_10 1..50000(1), mRNA: FBgn0031257, mRNA: FBgn0031257, mRNA: FBgn0031257	FBpp0303672:c.[1824T>C]; FBpp0077721:c.[1899T>C]
2L mapping	458429	SNV	1	C	T	37	100	35.5135	Exon: Exon, Exon: Exon, Gene: FBgn0031257, Misc. feature: contig 2L_1_10 1..50000(1), mRNA: FBgn0031257, mRNA: FBgn0031257, mRNA: FBgn0031257
2L mapping	458442	SNV	1	A	G	37	100	35.3784	Exon: Exon, Exon: Exon, Gene: FBgn0031257, Misc. feature: contig 2L_1_10 1..50000(1), mRNA: FBgn0031257, mRNA: FBgn0031257, mRNA: FBgn0031257
2L mapping	458724	SNV	1	A	G	46	100	31.5	Exon: Exon, Exon: Exon, Gene: FBgn0031257, Misc. feature: contig 2L_1_10 1..50000(1), mRNA: FBgn0031257, mRNA: FBgn0031257, mRNA: FBgn0031257
2L mapping	458754	SNV	1	T	C	40	100	34.025	Misc. feature: contig 2L_1_10 1..50000(1)
2L mapping	458803	SNV	1	A	G	36	97.2222	29.3429	Misc. feature: contig 2L_1_10 1..50000(1)
2L mapping	458832	Deletion	1	A	-	37	62.1622	24.6087	Misc. feature: contig 2L_1_10 1..50000(1)
2L mapping	458936	SNV	1	T	G	43	97.6744	34.0476	Exon: Exon, Gene: FBgn0031258, Misc. feature: contig 2L_1_10 1..50000(1), mRNA: FBgn0031258, mRNA: FBgn0031258
2L mapping	459010	SNV	1	A	C	53	100	35.6415	Exon: Exon, Gene: FBgn0031258, Misc. feature: contig 2L_1_10 1..50000(1), mRNA: FBgn0031258, mRNA: FBgn0031258
2L mapping	459470	SNV	1	C	T	42	100	35.619	Exon: Exon, Gene: FBgn0031258, Misc. feature: contig 2L_1_10 1..50000(1), mRNA: FBgn0031258, mRNA: FBgn0031258
2L mapping	459576	SNV	1	C	T	44	100	35.25	Exon: Exon, Gene: FBgn0031258, Misc. feature: contig 2L_1_10 1..50000(1), mRNA: FBgn0031258, mRNA: FBgn0031258
2L mapping	459604	SNV	1	C	T	42	100	35.8333	Exon: Exon, Gene: FBgn0031258, Misc. feature: contig 2L_1_10 1..50000(1), mRNA: FBgn0031258, mRNA: FBgn0031258
2L mapping	459777	SNV	1	A	T	44	100	35.6364	Exon: Exon, Gene: FBgn0031258, Misc. feature: contig 2L_1_10 1..50000(1), mRNA: FBgn0031258, mRNA: FBgn0031258
2L mapping	459907	Insertion	1	-	C	33	90.9091	34.2667	Exon: Exon, Gene: FBgn0031258, Misc. feature: contig 2L_1_10 1..50000(1), mRNA: FBgn0031258, mRNA: FBgn0031258
2L mapping	460138	SNV	1	T	A	49	100	34.7143	Exon: Exon, Gene: FBgn0031258, Misc. feature: contig 2L_1_10 1..50000(1), mRNA: FBgn0031258, mRNA: FBgn0031258
2L mapping	461581	SNV	1	A	G	37	100	35.0811	CDS: FBgn0031258, CDS: FBgn0031258, Exon: Exon, Gene: FBgn0031258, Misc. feature: contig 2L_1_10 1..50000(1), mRNA: FBgn0031258, mRNA: FBgn0031258	FBpp0301737:c.[3353T>C]; FBpp0301738:c.[3353T>C]	FBpp0301737:p.[Val1118Ala]; FBpp0301738:p.[Val1118Ala]
2L mapping	461802	SNV	1	T	C	45	100	35.0222	CDS: FBgn0031258, CDS: FBgn0031258, Exon: Exon, Gene: FBgn0031258, Misc. feature: contig 2L_1_10 1..50000(1), mRNA: FBgn0031258, mRNA: FBgn0031258	FBpp0301737:c.[3132A>G]; FBpp0301738:c.[3132A>G]
2L mapping	462506	SNV	1	A	C	45	100	35.6444	CDS: FBgn0031258, CDS: FBgn0031258, Exon: Exon, Gene: FBgn0031258, Misc. feature: contig 2L_1_10 1..50000(1), mRNA: FBgn0031258, mRNA: FBgn0031258	FBpp0301738:c.[2428T>G]; FBpp0301737:c.[2428T>G]	FBpp0301738:p.[Leu810Val]; FBpp0301737:p.[Leu810Val]
2L mapping	462741	SNV	1	T	C	43	100	35.2326	CDS: FBgn0031258, CDS: FBgn0031258, Exon: Exon, Gene: FBgn0031258, Misc. feature: contig 2L_1_10 1..50000(1), mRNA: FBgn0031258, mRNA: FBgn0031258	FBpp0301738:c.[2193A>G]; FBpp0301737:c.[2193A>G]
2L mapping	462744	SNV	1	G	A	42	100	35.8095	CDS: FBgn0031258, CDS: FBgn0031258, Exon: Exon, Gene: FBgn0031258, Misc. feature: contig 2L_1_10 1..50000(1), mRNA: FBgn0031258, mRNA: FBgn0031258	FBpp0301737:c.[2190C>T]; FBpp0301738:c.[2190C>T]
2L mapping	463002	SNV	1	G	T	39	100	32.9744	CDS: FBgn0031258, CDS: FBgn0031258, Exon: Exon, Gene: FBgn0031258, Misc. feature: contig 2L_1_10 1..50000(1), mRNA: FBgn0031258, mRNA: FBgn0031258	FBpp0301738:c.[1932C>A]; FBpp0301737:c.[1932C>A]
2L mapping	464034	SNV	1	C	A	30	96.6667	32.5172	CDS: FBgn0031258, CDS: FBgn0031258, Exon: Exon, Gene: FBgn0031258, Misc. feature: contig 2L_1_10 1..50000(1), mRNA: FBgn0031258, mRNA: FBgn0031258	FBpp0301738:c.[900G>T]; FBpp0301737:c.[900G>T]
2L mapping	464136	SNV	1	A	G	40	100	34.625	CDS: FBgn0031258, CDS: FBgn0031258, Exon: Exon, Gene: FBgn0031258, Misc. feature: contig 2L_1_10 1..50000(1), mRNA: FBgn0031258, mRNA: FBgn0031258	FBpp0301737:c.[798T>C]; FBpp0301738:c.[798T>C]
2L mapping	464582	SNV	1	G	C	41	100	33.3902	CDS: FBgn0031258, CDS: FBgn0031258, Exon: Exon, Gene: FBgn0031258, Misc. feature: contig 2L_1_10 1..50000(1), mRNA: FBgn0031258, mRNA: FBgn0031258	FBpp0301737:c.[352C>G]; FBpp0301738:c.[352C>G]	FBpp0301737:p.[Pro118Ala]; FBpp0301738:p.[Pro118Ala]
2L mapping	464760	SNV	1	G	A	31	100	35.3548	CDS: FBgn0031258, CDS: FBgn0031258, Exon: Exon, Gene: FBgn0031258, Misc. feature: contig 2L_1_10 1..50000(1), mRNA: FBgn0031258, mRNA: FBgn0031258	FBpp0301738:c.[174C>T]; FBpp0301737:c.[174C>T]
2L mapping	464880	SNV	1	A	T	34	100	35.7059	CDS: FBgn0031258, CDS: FBgn0031258, Exon: Exon, Gene: FBgn0031258, Misc. feature: contig 2L_1_10 1..50000(1), mRNA: FBgn0031258, mRNA: FBgn0031258	FBpp0301738:c.[54T>A]; FBpp0301737:c.[54T>A]
2L mapping	464953	SNV	1	T	G	40	100	34.125	Gene: FBgn0031258, Misc. feature: contig 2L_1_10 1..50000(1)
2L mapping	465215	SNV	1	A	C	48	100	35.2292	Gene: FBgn0031258, Misc. feature: contig 2L_1_10 1..50000(1)
2L mapping	465374	SNV	1	A	G	49	100	33.551	Gene: FBgn0031258, Misc. feature: contig 2L_1_10 1..50000(1)
2L mapping	465414	SNV	1	C	A	36	97.2222	32.6	Gene: FBgn0031258, Misc. feature: contig 2L_1_10 1..50000(1)
2L mapping	465416	SNV	1	T	G	36	100	33.9167	Gene: FBgn0031258, Misc. feature: contig 2L_1_10 1..50000(1)
2L mapping	465424	SNV	1	G	T	44	100	34.8409	Gene: FBgn0031258, Misc. feature: contig 2L_1_10 1..50000(1)
2L mapping	465730	Insertion	1	-	T	42	97.619	34.7805	Gene: FBgn0031258, Misc. feature: contig 2L_1_10 1..50000(1)
2L mapping	465790	SNV	1	G	A	42	100	34.9762	Gene: FBgn0031258, Misc. feature: contig 2L_1_10 1..50000(1)
2L mapping	465940	SNV	1	C	A	33	100	34.2424	Gene: FBgn0031258, Misc. feature: contig 2L_1_10 1..50000(1)
2L mapping	466416	SNV	1	A	G	43	95.3488	35.3415	Gene: FBgn0031258, Misc. feature: contig 2L_1_10 1..50000(1)
2L mapping	466504	SNV	1	G	A	51	100	36.6078	Gene: FBgn0031258, Misc. feature: contig 2L_1_10 1..50000(1)
2L mapping	466537	SNV	1	C	T	54	100	35.4815	Gene: FBgn0031258, Misc. feature: contig 2L_1_10 1..50000(1)
2L mapping	467141	SNV	1	A	G	33	100	31.3636	Gene: FBgn0031258, Misc. feature: contig 2L_1_10 1..50000(1)
2L mapping	467285	SNV	1	C	T	50	100	35.94	Gene: FBgn0031258, Misc. feature: contig 2L_1_10 1..50000(1)
2L mapping	467327	SNV	1	A	T	50	100	35.38	Gene: FBgn0031258, Misc. feature: contig 2L_1_10 1..50000(1)
2L mapping	467346	SNV	1	T	A	57	94.7368	34.463	Gene: FBgn0031258, Misc. feature: contig 2L_1_10 1..50000(1)
2L mapping	467357	SNV	1	G	A	52	100	35.6154	Gene: FBgn0031258, Misc. feature: contig 2L_1_10 1..50000(1)
2L mapping	467492	SNV	1	G	A	45	100	36.1778	Gene: FBgn0031258, Misc. feature: contig 2L_1_10 1..50000(1)
2L mapping	467663	SNV	1	A	T	44	100	34.7273	Gene: FBgn0031258, Misc. feature: contig 2L_1_10 1..50000(1)
2L mapping	467704	SNV	1	G	T	47	100	35.4468	Gene: FBgn0031258, Misc. feature: contig 2L_1_10 1..50000(1)
2L mapping	467717	SNV	1	C	T	46	100	32.8696	Gene: FBgn0031258, Misc. feature: contig 2L_1_10 1..50000(1)
2L mapping	467813	SNV	1	C	G	31	100	33.871	Gene: FBgn0031258, Misc. feature: contig 2L_1_10 1..50000(1)
2L mapping	468431	SNV	1	T	C	39	100	36.5385	Gene: FBgn0031258, Misc. feature: contig 2L_1_10 1..50000(1)
2L mapping	468585	SNV	1	T	C	38	100	33.7105	Gene: FBgn0031258, Misc. feature: contig 2L_1_10 1..50000(1)
2L mapping	468614	SNV	1	C	A	41	100	32.6585	Gene: FBgn0031258, Misc. feature: contig 2L_1_10 1..50000(1)
2L mapping	468651	SNV	1	C	G	36	100	34.8333	Gene: FBgn0031258, Misc. feature: contig 2L_1_10 1..50000(1)
2L mapping	468936	SNV	1	C	A	42	100	35.0952	Gene: FBgn0031258, Misc. feature: contig 2L_1_10 1..50000(1)
2L mapping	469414	SNV	1	A	C	47	100	33.0638	Gene: FBgn0031258, Misc. feature: contig 2L_1_10 1..50000(1)
2L mapping	469446	SNV	1	G	A	36	100	36.7778	Gene: FBgn0031258, Misc. feature: contig 2L_1_10 1..50000(1)
2L mapping	469453	SNV	1	A	G	33	100	36.5758	Gene: FBgn0031258, Misc. feature: contig 2L_1_10 1..50000(1)
2L mapping	469685	SNV	1	T	G	47	100	35.2979	Gene: FBgn0031258, Misc. feature: contig 2L_1_10 1..50000(1)
2L mapping	469710	SNV	1	T	C	41	100	35.561	Gene: FBgn0031258, Misc. feature: contig 2L_1_10 1..50000(1)
2L mapping	469732	SNV	1	C	T	37	89.1892	35.303	Gene: FBgn0031258, Misc. feature: contig 2L_1_10 1..50000(1)
2L mapping	469734	SNV	1	T	A	37	89.1892	35.7576	Gene: FBgn0031258, Misc. feature: contig 2L_1_10 1..50000(1)
2L mapping	469941	SNV	1	A	G	40	100	35.75	Gene: FBgn0031258, Misc. feature: contig 2L_1_10 1..50000(1)
2L mapping	470163	SNV	1	C	T	45	100	35.2889	Gene: FBgn0031258, Misc. feature: contig 2L_1_10 1..50000(1)
2L mapping	470361	SNV	1	T	A	46	100	36.1087	Gene: FBgn0031258, Misc. feature: contig 2L_1_10 1..50000(1)
2L mapping	470447	SNV	1	A	G	41	97.561	33.875	Gene: FBgn0031258, Misc. feature: contig 2L_1_10 1..50000(1)
2L mapping	470557	Deletion	2	AA	-	43	81.3953	31.9143	Gene: FBgn0031258, Misc. feature: contig 2L_1_10 1..50000(1)
2L mapping	470674	SNV	1	A	T	40	100	34.575	Gene: FBgn0031258, Misc. feature: contig 2L_1_10 1..50000(1)
2L mapping	470758	SNV	1	G	A	48	100	36.625	Gene: FBgn0031258, Misc. feature: contig 2L_1_10 1..50000(1)
2L mapping	471065	Deletion	2	AA	-	46	78.2609	35.5833	Gene: FBgn0031258, Misc. feature: contig 2L_1_10 1..50000(1)
2L mapping	471163	SNV	1	C	G	45	100	35.2667	Gene: FBgn0031258, Misc. feature: contig 2L_1_10 1..50000(1)
2L mapping	471186	SNV	1	T	C	43	100	36.3953	Gene: FBgn0031258, Misc. feature: contig 2L_1_10 1..50000(1)
2L mapping	471468	SNV	1	G	T	49	100	34.8571	Exon: Exon, Exon: Exon, Gene: FBgn0031258, Misc. feature: contig 2L_1_10 1..50000(1), mRNA: FBgn0031258, mRNA: FBgn0031258
2L mapping	471558	Insertion	1	-	T	51	86.2745	35.8864	Exon: Exon, Gene: FBgn0031258, Misc. feature: contig 2L_1_10 1..50000(1), mRNA: FBgn0031258
2L mapping	471594	Deletion	1	T	-	41	90.2439	32.027	Exon: Exon, Gene: FBgn0031258, Misc. feature: contig 2L_1_10 1..50000(1), mRNA: FBgn0031258
2L mapping	471954	SNV	1	A	G	61	100	34.7049	Exon: Exon, Gene: FBgn0031258, Misc. feature: contig 2L_1_10 1..50000(1), mRNA: FBgn0031258
2L mapping	472498	SNV	1	T	C	48	97.9167	34.5532	Misc. feature: contig 2L_1_10 1..50000(1)
2L mapping	472514	SNV	1	G	A	52	100	35.3077	Misc. feature: contig 2L_1_10 1..50000(1)
2L mapping	472671	Insertion	1	-	T	60	100	35.6167	Misc. feature: contig 2L_1_10 1..50000(1)
2L mapping	472697	SNV	1	G	C	62	100	36.2742	Misc. feature: contig 2L_1_10 1..50000(1)
2L mapping	472820	Insertion	2	-	TT	62	82.2581	36.5294	Misc. feature: contig 2L_1_10 1..50000(1)
2L mapping	472837	SNV	1	C	T	59	100	35.5763	Misc. feature: contig 2L_1_10 1..50000(1)
2L mapping	472960	SNV	1	C	A	54	100	35.3333	Misc. feature: contig 2L_1_10 1..50000(1)
2L mapping	472967	SNV	1	T	A	57	100	35.8596	Misc. feature: contig 2L_1_10 1..50000(1)
2L mapping	473033	SNV	1	C	G	45	100	33.7556	Exon: Exon, Gene: FBgn0027592, Misc. feature: contig 2L_1_10 1..50000(1), mRNA: FBgn0027592
2L mapping	473195	Deletion	3	AGT	-	31	77.4194	35.2917	Gene: FBgn0027592, Misc. feature: contig 2L_1_10 1..50000(1)	FBpp0077722:c.54-28_54-26delAGT
2L mapping	473223	SNV	1	C	T	38	100	35.6842	CDS: FBgn0027592, Exon: Exon, Gene: FBgn0027592, Misc. feature: contig 2L_1_10 1..50000(1), mRNA: FBgn0027592	FBpp0077722:c.54C>T
2L mapping	473424	SNV	1	G	A	33	100	35.9697	CDS: FBgn0027592, Exon: Exon, Gene: FBgn0027592, Misc. feature: contig 2L_1_10 1..50000(1), mRNA: FBgn0027592	FBpp0077722:c.255G>A
2L mapping	473724	SNV	1	A	C	28	100	33.7857	CDS: FBgn0027592, Exon: Exon, Gene: FBgn0027592, Misc. feature: contig 2L_1_10 1..50000(1), mRNA: FBgn0027592	FBpp0077722:c.555A>C
2L mapping	473751	SNV	1	C	A	34	100	34.6176	CDS: FBgn0027592, Exon: Exon, Gene: FBgn0027592, Misc. feature: contig 2L_1_10 1..50000(1), mRNA: FBgn0027592	FBpp0077722:c.582C>A
2L mapping	474128	SNV	1	T	C	25	96	34.5	CDS: FBgn0027592, Exon: Exon, Gene: FBgn0027592, Misc. feature: contig 2L_1_10 1..50000(1), mRNA: FBgn0027592	FBpp0077722:c.900T>C
2L mapping	474287	SNV	1	A	G	31	96.7742	33.7	CDS: FBgn0027592, Exon: Exon, Gene: FBgn0027592, Misc. feature: contig 2L_1_10 1..50000(1), mRNA: FBgn0027592	FBpp0077722:c.1059A>G
2L mapping	474416	SNV	1	A	G	34	100	34.1471	CDS: FBgn0027592, Exon: Exon, Gene: FBgn0027592, Misc. feature: contig 2L_1_10 1..50000(1), mRNA: FBgn0027592	FBpp0077722:c.1188A>G
2L mapping	474683	SNV	1	A	G	35	97.1429	34.5882	CDS: FBgn0027592, Exon: Exon, Gene: FBgn0027592, Misc. feature: contig 2L_1_10 1..50000(1), mRNA: FBgn0027592	FBpp0077722:c.1455A>G
2L mapping	474776	SNV	1	A	G	38	97.3684	34.6757	Gene: FBgn0027592, Misc. feature: contig 2L_1_10 1..50000(1)	FBpp0077722:c.1537+11A>G
2L mapping	474793	Insertion	3	-	TTT	36	77.7778	34.5	Gene: FBgn0027592, Misc. feature: contig 2L_1_10 1..50000(1)	FBpp0077722:c.1537+27_1537+28insTTT
2L mapping	474824	SNV	1	T	A	41	97.561	33.425	Gene: FBgn0027592, Misc. feature: contig 2L_1_10 1..50000(1)	FBpp0077722:c.1537+59T>A
2L mapping	474836	SNV	1	T	A	37	94.5946	33.9714	Gene: FBgn0027592, Misc. feature: contig 2L_1_10 1..50000(1)	FBpp0077722:c.1537+71T>A
2L mapping	474839	SNV	1	A	T	34	91.1765	33.9355	Gene: FBgn0027592, Misc. feature: contig 2L_1_10 1..50000(1)	FBpp0077722:c.1537+74A>T
2L mapping	474841	Deletion	1	T	-	34	94.1176	32.5938	Gene: FBgn0027592, Misc. feature: contig 2L_1_10 1..50000(1)	FBpp0077722:c.1537+76delT
2L mapping	474843	Deletion	2	CT	-	34	94.1176	32.6562	Gene: FBgn0027592, Misc. feature: contig 2L_1_10 1..50000(1)	FBpp0077722:c.1537+78_1537+79delCT
2L mapping	474870	SNV	1	A	T	40	97.5	35.8974	Gene: FBgn0027592, Misc. feature: contig 2L_1_10 1..50000(1)	FBpp0077722:c.1537+105A>T
2L mapping	474885	Deletion	2	TT	-	33	66.6667	35.7727	Gene: FBgn0027592, Misc. feature: contig 2L_1_10 1..50000(1)	FBpp0077722:c.1537+120_1537+121delTT
2L mapping	474890	Deletion	1	T	-	23	95.6522	36.6364	Gene: FBgn0027592, Misc. feature: contig 2L_1_10 1..50000(1)	FBpp0077722:c.1537+125delT
2L mapping	474893	SNV	1	T	A	23	95.6522	36.8182	Gene: FBgn0027592, Misc. feature: contig 2L_1_10 1..50000(1)	FBpp0077722:c.1537+128T>A
2L mapping	474895	MNV	4	GTTT	TGGC	23	95.6522	36.3182	Gene: FBgn0027592, Misc. feature: contig 2L_1_10 1..50000(1)	FBpp0077722:c.1537+130_1537+133delGTTTinsTGGC
2L mapping	474932	SNV	1	A	C	40	100	36.125	Gene: FBgn0027592, Misc. feature: contig 2L_1_10 1..50000(1)	FBpp0077722:c.1538-104A>C
2L mapping	474934	SNV	1	A	G	40	100	34.35	Gene: FBgn0027592, Misc. feature: contig 2L_1_10 1..50000(1)	FBpp0077722:c.1538-102A>G
2L mapping	474943	SNV	1	T	A	40	100	33.925	Gene: FBgn0027592, Misc. feature: contig 2L_1_10 1..50000(1)	FBpp0077722:c.1538-93T>A
2L mapping	474959	SNV	1	G	T	46	97.8261	34.5333	Gene: FBgn0027592, Misc. feature: contig 2L_1_10 1..50000(1)	FBpp0077722:c.1538-77G>T
2L mapping	475106	SNV	1	G	T	56	100	35.7321	CDS: FBgn0027592, Exon: Exon, Gene: FBgn0027592, Misc. feature: contig 2L_1_10 1..50000(1), mRNA: FBgn0027592	FBpp0077722:c.1608G>T
2L mapping	475206	SNV	1	A	T	53	96.2264	35.451	Gene: FBgn0027592, Misc. feature: contig 2L_1_10 1..50000(1)	FBpp0077722:c.1681-27A>T
2L mapping	475238	SNV	1	C	A	53	100	35.9623	CDS: FBgn0027592, Exon: Exon, Gene: FBgn0027592, Misc. feature: contig 2L_1_10 1..50000(1), mRNA: FBgn0027592	FBpp0077722:c.1686C>A
2L mapping	475256	SNV	1	G	A	55	100	35.0182	CDS: FBgn0027592, Exon: Exon, Gene: FBgn0027592, Misc. feature: contig 2L_1_10 1..50000(1), mRNA: FBgn0027592	FBpp0077722:c.1704G>A
2L mapping	475299	SNV	1	T	C	43	100	35.5116	CDS: FBgn0027592, Exon: Exon, Gene: FBgn0027592, Misc. feature: contig 2L_1_10 1..50000(1), mRNA: FBgn0027592	FBpp0077722:c.1747T>C
2L mapping	475500	SNV	1	G	A	43	100	33.6977	CDS: FBgn0027592, Exon: Exon, Gene: FBgn0027592, Misc. feature: contig 2L_1_10 1..50000(1), mRNA: FBgn0027592	FBpp0077722:c.1948G>A	FBpp0077722:p.Ala650Thr
2L mapping	475533	SNV	1	A	C	37	100	35.1081	CDS: FBgn0027592, Exon: Exon, Gene: FBgn0027592, Misc. feature: contig 2L_1_10 1..50000(1), mRNA: FBgn0027592	FBpp0077722:c.1981A>C
2L mapping	475832	MNV	2	CA	TT	51	98.0392	36.23	Exon: Exon, Gene: FBgn0027592, Misc. feature: contig 2L_1_10 1..50000(1), mRNA: FBgn0027592
2L mapping	475842	SNV	1	T	C	60	100	35.0667	Exon: Exon, Gene: FBgn0027592, Misc. feature: contig 2L_1_10 1..50000(1), mRNA: FBgn0027592
2L mapping	475871	Insertion	2	-	TT	57	82.4561	34.6277	Gene: FBgn0027592, Misc. feature: contig 2L_1_10 1..50000(1)
2L mapping	475902	SNV	1	C	G	58	98.2759	35.1754	Gene: FBgn0027592, Misc. feature: contig 2L_1_10 1..50000(1)
2L mapping	475944	SNV	1	A	G	49	97.9592	32.2917	Exon: Exon, Gene: FBgn0027592, Misc. feature: contig 2L_1_10 1..50000(1), mRNA: FBgn0027592
2L mapping	475994	SNV	1	G	A	47	100	34.2553	Exon: Exon, Gene: FBgn0027592, Misc. feature: contig 2L_1_10 1..50000(1), mRNA: FBgn0027592
2L mapping	476175	Deletion	1	A	-	53	58.4906	34.1935	Misc. feature: contig 2L_1_10 1..50000(1)
2L mapping	476280	SNV	1	A	T	44	100	34.75	Exon: Exon, Gene: FBgn0003963, Misc. feature: contig 2L_1_10 1..50000(1), mRNA: FBgn0003963, mRNA: FBgn0003963
2L mapping	476363	SNV	1	C	A	52	100	34.5577	Gene: FBgn0003963, Misc. feature: contig 2L_1_10 1..50000(1)
2L mapping	476369	Insertion	1	-	A	53	84.9057	34.8444	Gene: FBgn0003963, Misc. feature: contig 2L_1_10 1..50000(1)
2L mapping	476572	SNV	1	G	A	62	100	35.7903	Exon: Exon, Exon: Exon, Exon: Exon, Gene: FBgn0003963, Gene: FBgn0043364, Misc. feature: contig 2L_1_10 1..50000(1), mRNA: FBgn0043364, mRNA: FBgn0043364, mRNA: FBgn0043364
2L mapping	476583	SNV	1	T	C	62	100	34.5645	Exon: Exon, Exon: Exon, Exon: Exon, Gene: FBgn0003963, Gene: FBgn0043364, Misc. feature: contig 2L_1_10 1..50000(1), mRNA: FBgn0043364, mRNA: FBgn0043364, mRNA: FBgn0043364
2L mapping	476893	SNV	1	T	A	35	100	35.2286	Exon: Exon, Exon: Exon, Exon: Exon, Gene: FBgn0003963, Gene: FBgn0043364, Misc. feature: contig 2L_1_10 1..50000(1), mRNA: FBgn0043364, mRNA: FBgn0043364, mRNA: FBgn0043364
2L mapping	476904	MNV	2	GA	CC	33	100	33.2273	Exon: Exon, Exon: Exon, Exon: Exon, Gene: FBgn0003963, Gene: FBgn0043364, Misc. feature: contig 2L_1_10 1..50000(1), mRNA: FBgn0043364, mRNA: FBgn0043364, mRNA: FBgn0043364
2L mapping	476966	SNV	1	A	G	31	100	34.1613	Exon: Exon, Exon: Exon, Exon: Exon, Gene: FBgn0003963, Gene: FBgn0043364, Misc. feature: contig 2L_1_10 1..50000(1), mRNA: FBgn0043364, mRNA: FBgn0043364, mRNA: FBgn0043364
2L mapping	477023	SNV	1	G	A	38	97.3684	35.6216	CDS: FBgn0043364, CDS: FBgn0043364, CDS: FBgn0043364, Exon: Exon, Exon: Exon, Exon: Exon, Gene: FBgn0003963, Gene: FBgn0043364, Misc. feature: contig 2L_1_10 1..50000(1), mRNA: FBgn0043364, mRNA: FBgn0043364, mRNA: FBgn0043364	FBpp0301733:c.[1008C>T]; FBpp0077743:c.[1251C>T]; FBpp0077744:c.[1008C>T]
2L mapping	477449	SNV	1	G	A	42	100	32.619	CDS: FBgn0043364, CDS: FBgn0043364, CDS: FBgn0043364, Exon: Exon, Exon: Exon, Exon: Exon, Gene: FBgn0003963, Gene: FBgn0043364, Misc. feature: contig 2L_1_10 1..50000(1), mRNA: FBgn0043364, mRNA: FBgn0043364, mRNA: FBgn0043364	FBpp0077744:c.[582C>T]; FBpp0077743:c.[825C>T]; FBpp0301733:c.[582C>T]
2L mapping	477470	SNV	1	G	A	43	100	35.7209	CDS: FBgn0043364, CDS: FBgn0043364, CDS: FBgn0043364, Exon: Exon, Exon: Exon, Exon: Exon, Gene: FBgn0003963, Gene: FBgn0043364, Misc. feature: contig 2L_1_10 1..50000(1), mRNA: FBgn0043364, mRNA: FBgn0043364, mRNA: FBgn0043364	FBpp0301733:c.[561C>T]; FBpp0077743:c.[804C>T]; FBpp0077744:c.[561C>T]
2L mapping	477659	SNV	1	C	T	46	100	35.2391	CDS: FBgn0043364, CDS: FBgn0043364, CDS: FBgn0043364, Exon: Exon, Exon: Exon, Exon: Exon, Gene: FBgn0003963, Gene: FBgn0043364, Misc. feature: contig 2L_1_10 1..50000(1), mRNA: FBgn0043364, mRNA: FBgn0043364, mRNA: FBgn0043364	FBpp0077743:c.[615G>A]; FBpp0077744:c.[372G>A]; FBpp0301733:c.[372G>A]
2L mapping	477712	SNV	1	T	C	44	100	33.2045	CDS: FBgn0043364, CDS: FBgn0043364, CDS: FBgn0043364, Exon: Exon, Exon: Exon, Exon: Exon, Gene: FBgn0003963, Gene: FBgn0043364, Misc. feature: contig 2L_1_10 1..50000(1), mRNA: FBgn0043364, mRNA: FBgn0043364, mRNA: FBgn0043364	FBpp0077743:c.[562A>G]; FBpp0077744:c.[319A>G]; FBpp0301733:c.[319A>G]	FBpp0077743:p.[Thr188Ala]; FBpp0077744:p.[Thr107Ala]; FBpp0301733:p.[Thr107Ala]
2L mapping	477926	SNV	1	A	G	45	100	35.7556	CDS: FBgn0043364, CDS: FBgn0043364, CDS: FBgn0043364, Exon: Exon, Exon: Exon, Exon: Exon, Gene: FBgn0003963, Gene: FBgn0043364, Misc. feature: contig 2L_1_10 1..50000(1), mRNA: FBgn0043364, mRNA: FBgn0043364, mRNA: FBgn0043364	FBpp0077743:c.[348T>C]; FBpp0301733:c.[105T>C]; FBpp0077744:c.[105T>C]
2L mapping	477980	SNV	1	C	A	41	100	35.3171	CDS: FBgn0043364, CDS: FBgn0043364, CDS: FBgn0043364, Exon: Exon, Exon: Exon, Exon: Exon, Gene: FBgn0003963, Gene: FBgn0043364, Misc. feature: contig 2L_1_10 1..50000(1), mRNA: FBgn0043364, mRNA: FBgn0043364, mRNA: FBgn0043364	FBpp0301733:c.[51G>T]; FBpp0077744:c.[51G>T]; FBpp0077743:c.[294G>T]
2L mapping	478456	SNV	1	T	A	53	100	35.3962	Exon: Exon, Gene: FBgn0003963, Gene: FBgn0043364, Misc. feature: contig 2L_1_10 1..50000(1), mRNA: FBgn0043364	FBpp0077743:c.70-252A>T
2L mapping	478480	SNV	1	C	T	55	100	35.8182	Exon: Exon, Gene: FBgn0003963, Gene: FBgn0043364, Misc. feature: contig 2L_1_10 1..50000(1), mRNA: FBgn0043364	FBpp0077743:c.70-276G>A
2L mapping	478579	Deletion	5	TGTAT	-	42	66.6667	35.1786	Exon: Exon, Gene: FBgn0003963, Gene: FBgn0043364, Misc. feature: contig 2L_1_10 1..50000(1), mRNA: FBgn0043364	FBpp0077743:c.70-379_70-375delATACA
2L mapping	478661	SNV	1	C	T	46	97.8261	33.4	Exon: Exon, Gene: FBgn0003963, Gene: FBgn0043364, Misc. feature: contig 2L_1_10 1..50000(1), mRNA: FBgn0043364	FBpp0077743:c.70-457G>A
2L mapping	478801	SNV	1	G	A	61	100	35.2623	Exon: Exon, Gene: FBgn0003963, Gene: FBgn0043364, Misc. feature: contig 2L_1_10 1..50000(1), mRNA: FBgn0043364	FBpp0077743:c.70-597C>T
2L mapping	478918	SNV	1	A	T	42	100	34.0952	Exon: Exon, Gene: FBgn0003963, Gene: FBgn0043364, Misc. feature: contig 2L_1_10 1..50000(1), mRNA: FBgn0043364	FBpp0077743:c.69+489T>A
2L mapping	479380	SNV	1	T	C	47	100	35.4255	Exon: Exon, Exon: Exon, Gene: FBgn0003963, Gene: FBgn0043364, Misc. feature: contig 2L_1_10 1..50000(1), mRNA: FBgn0043364, mRNA: FBgn0043364	FBpp0077743:c.69+27A>G
2L mapping	480068	SNV	1	C	A	30	100	35.4333	Gene: FBgn0003963, Misc. feature: contig 2L_1_10 1..50000(1)
2L mapping	480121	SNV	1	C	T	28	100	34.9643	Gene: FBgn0003963, Misc. feature: contig 2L_1_10 1..50000(1)
2L mapping	480273	SNV	1	T	G	41	100	35.5122	Gene: FBgn0003963, Misc. feature: contig 2L_1_10 1..50000(1)
2L mapping	480716	SNV	1	T	A	43	100	35	Gene: FBgn0003963, Misc. feature: contig 2L_1_10 1..50000(1)
2L mapping	480968	SNV	1	G	A	45	100	33.7111	Gene: FBgn0003963, Misc. feature: contig 2L_1_10 1..50000(1)
2L mapping	480990	SNV	1	G	A	43	100	35.186	Gene: FBgn0003963, Misc. feature: contig 2L_1_10 1..50000(1)
2L mapping	481048	SNV	1	A	G	54	98.1481	35.1321	Gene: FBgn0003963, Misc. feature: contig 2L_1_10 1..50000(1)
2L mapping	481082	SNV	1	A	T	37	100	34.5405	Gene: FBgn0003963, Misc. feature: contig 2L_1_10 1..50000(1)
2L mapping	481087	SNV	1	A	G	40	100	35.9	Gene: FBgn0003963, Misc. feature: contig 2L_1_10 1..50000(1)
2L mapping	481134	SNV	1	C	A	37	100	35.3514	Gene: FBgn0003963, Misc. feature: contig 2L_1_10 1..50000(1)
2L mapping	481183	Insertion	1	-	A	34	94.1176	36.375	Gene: FBgn0003963, Misc. feature: contig 2L_1_10 1..50000(1)
2L mapping	481806	SNV	1	A	G	27	100	34.4074	Gene: FBgn0003963, Misc. feature: contig 2L_1_10 1..50000(1)
2L mapping	482466	SNV	1	A	T	39	100	35.4615	Gene: FBgn0003963, Misc. feature: contig 2L_1_10 1..50000(1)
2L mapping	482547	SNV	1	A	G	52	100	34.7692	Gene: FBgn0003963, Misc. feature: contig 2L_1_10 1..50000(1)
2L mapping	482850	SNV	1	T	C	57	100	35.5263	Gene: FBgn0003963, Misc. feature: contig 2L_1_10 1..50000(1)
2L mapping	483363	SNV	1	A	G	47	100	34.1064	Gene: FBgn0003963, Misc. feature: contig 2L_1_10 1..50000(1)
2L mapping	483380	SNV	1	C	A	40	95	34.1053	Gene: FBgn0003963, Misc. feature: contig 2L_1_10 1..50000(1)
2L mapping	483776	SNV	1	T	C	49	95.9184	33.8298	Gene: FBgn0003963, Misc. feature: contig 2L_1_10 1..50000(1)
2L mapping	483924	SNV	1	C	T	48	95.8333	35.4565	Gene: FBgn0003963, Misc. feature: contig 2L_1_10 1..50000(1)
2L mapping	483990	SNV	1	A	T	52	98.0769	34.6667	Gene: FBgn0003963, Misc. feature: contig 2L_1_10 1..50000(1)
2L mapping	484142	SNV	1	C	T	58	98.2759	35.6842	Gene: FBgn0003963, Misc. feature: contig 2L_1_10 1..50000(1)
2L mapping	484165	SNV	1	C	T	49	100	34.2041	Gene: FBgn0003963, Misc. feature: contig 2L_1_10 1..50000(1)
2L mapping	484284	SNV	1	T	C	35	100	33.0286	Gene: FBgn0003963, Misc. feature: contig 2L_1_10 1..50000(1)
2L mapping	484310	SNV	1	A	T	42	100	35.7381	Gene: FBgn0003963, Misc. feature: contig 2L_1_10 1..50000(1)
2L mapping	485176	SNV	1	C	T	41	100	35.6829	Gene: FBgn0003963, Misc. feature: contig 2L_1_10 1..50000(1)
2L mapping	485182	SNV	1	C	T	43	100	33.8372	Gene: FBgn0003963, Misc. feature: contig 2L_1_10 1..50000(1)
2L mapping	485221	SNV	1	A	G	44	100	34.9318	Gene: FBgn0003963, Misc. feature: contig 2L_1_10 1..50000(1)
2L mapping	485234	SNV	1	G	A	45	100	35.3111	Gene: FBgn0003963, Misc. feature: contig 2L_1_10 1..50000(1)
2L mapping	485254	SNV	1	T	C	43	100	35.0465	Gene: FBgn0003963, Misc. feature: contig 2L_1_10 1..50000(1)
2L mapping	485256	SNV	1	C	A	43	100	34.4419	Gene: FBgn0003963, Misc. feature: contig 2L_1_10 1..50000(1)
2L mapping	485274	Deletion	7	CATCTGC	-	38	78.9474	32.7	Gene: FBgn0003963, Misc. feature: contig 2L_1_10 1..50000(1)
2L mapping	485315	SNV	1	C	T	32	100	34.7812	Gene: FBgn0003963, Misc. feature: contig 2L_1_10 1..50000(1)
2L mapping	485447	Deletion	6	AATCGG	-	32	68.75	34.6818	Gene: FBgn0003963, Misc. feature: contig 2L_1_10 1..50000(1)
2L mapping	485558	SNV	1	T	G	36	100	35.5	Gene: FBgn0003963, Misc. feature: contig 2L_1_10 1..50000(1)
2L mapping	485575	SNV	1	C	G	32	100	36.0625	Gene: FBgn0003963, Misc. feature: contig 2L_1_10 1..50000(1)
2L mapping	485964	SNV	1	C	A	41	100	34.2195	Gene: FBgn0003963, Misc. feature: contig 2L_1_10 1..50000(1)
2L mapping	486046	SNV	1	G	C	36	97.2222	34.2857	Gene: FBgn0003963, Misc. feature: contig 2L_1_10 1..50000(1)
2L mapping	486094	SNV	1	T	C	36	100	35.0833	Gene: FBgn0003963, Misc. feature: contig 2L_1_10 1..50000(1)
2L mapping	486338	Deletion	1	T	-	52	84.6154	30.0909	Gene: FBgn0003963, Misc. feature: contig 2L_1_10 1..50000(1)
2L mapping	486594	SNV	1	T	G	34	100	35.5588	Gene: FBgn0003963, Misc. feature: contig 2L_1_10 1..50000(1)
2L mapping	486610	Deletion	1	T	-	45	37.7778	31	Gene: FBgn0003963, Misc. feature: contig 2L_1_10 1..50000(1)
2L mapping	486613	SNV	1	A	G	47	42.5532	33.4	Gene: FBgn0003963, Misc. feature: contig 2L_1_10 1..50000(1)
2L mapping	486619	MNV	2	TC	GA	44	45.4545	32.625	Gene: FBgn0003963, Misc. feature: contig 2L_1_10 1..50000(1)
2L mapping	486632	SNV	1	A	T	25	100	34.84	Gene: FBgn0003963, Misc. feature: contig 2L_1_10 1..50000(1)
2L mapping	486752	SNV	1	G	A	39	100	36.0256	Gene: FBgn0003963, Misc. feature: contig 2L_1_10 1..50000(1)
2L mapping	486803	SNV	1	C	T	44	100	35.1136	Gene: FBgn0003963, Misc. feature: contig 2L_1_10 1..50000(1)
2L mapping	486904	Insertion	10	-	TGGTCATATC	28	42.8571	35.7417	Gene: FBgn0003963, Misc. feature: contig 2L_1_10 1..50000(1)
2L mapping	486918	Insertion	1	-	C	36	100	35.6389	Gene: FBgn0003963, Misc. feature: contig 2L_1_10 1..50000(1)
2L mapping	486931	SNV	1	T	C	46	100	35.9348	Gene: FBgn0003963, Misc. feature: contig 2L_1_10 1..50000(1)
2L mapping	486939	SNV	1	G	A	49	100	35.5918	Gene: FBgn0003963, Misc. feature: contig 2L_1_10 1..50000(1)
2L mapping	486941	SNV	1	G	C	49	100	36.1633	Gene: FBgn0003963, Misc. feature: contig 2L_1_10 1..50000(1)
2L mapping	486955	SNV	1	C	T	50	100	36.46	Gene: FBgn0003963, Misc. feature: contig 2L_1_10 1..50000(1)
2L mapping	486961	SNV	1	C	G	49	100	35.0816	Gene: FBgn0003963, Misc. feature: contig 2L_1_10 1..50000(1)
2L mapping	486980	SNV	1	T	C	45	100	35.4444	Gene: FBgn0003963, Misc. feature: contig 2L_1_10 1..50000(1)
2L mapping	486985	SNV	1	G	A	47	100	35.1702	Gene: FBgn0003963, Misc. feature: contig 2L_1_10 1..50000(1)
2L mapping	487008	SNV	1	G	C	47	100	34.9149	Gene: FBgn0003963, Misc. feature: contig 2L_1_10 1..50000(1)
2L mapping	487048	SNV	1	A	C	45	100	31.4667	Gene: FBgn0003963, Misc. feature: contig 2L_1_10 1..50000(1)
2L mapping	487065	SNV	1	T	C	53	64.1509	34.5	Gene: FBgn0003963, Misc. feature: contig 2L_1_10 1..50000(1)
2L mapping	487073	SNV	1	G	T	48	56.25	34.5185	Gene: FBgn0003963, Misc. feature: contig 2L_1_10 1..50000(1)
2L mapping	487081	SNV	1	T	C	53	58.4906	34.6774	Gene: FBgn0003963, Misc. feature: contig 2L_1_10 1..50000(1)
2L mapping	487083	SNV	1	T	G	53	58.4906	32.9355	Gene: FBgn0003963, Misc. feature: contig 2L_1_10 1..50000(1)
2L mapping	487104	SNV	1	C	A	55	100	30.4182	Gene: FBgn0003963, Misc. feature: contig 2L_1_10 1..50000(1)
2L mapping	487123	SNV	1	C	T	63	100	35.127	Gene: FBgn0003963, Misc. feature: contig 2L_1_10 1..50000(1)
2L mapping	487257	SNV	1	C	A	48	100	35.1042	Gene: FBgn0003963, Misc. feature: contig 2L_1_10 1..50000(1)
2L mapping	487317	SNV	1	A	C	47	100	35.0638	Gene: FBgn0003963, Misc. feature: contig 2L_1_10 1..50000(1)
2L mapping	487466	SNV	1	C	G	52	98.0769	34.451	Gene: FBgn0003963, Misc. feature: contig 2L_1_10 1..50000(1)
2L mapping	487472	SNV	1	T	C	44	100	34.7045	Gene: FBgn0003963, Misc. feature: contig 2L_1_10 1..50000(1)
2L mapping	487477	SNV	1	A	G	42	100	34.881	Gene: FBgn0003963, Misc. feature: contig 2L_1_10 1..50000(1)
2L mapping	487533	SNV	1	T	G	38	100	35.7895	Gene: FBgn0003963, Misc. feature: contig 2L_1_10 1..50000(1)
2L mapping	487536	SNV	1	T	G	35	100	35.7143	Gene: FBgn0003963, Misc. feature: contig 2L_1_10 1..50000(1)
2L mapping	487543	SNV	1	C	T	36	100	35.5	Gene: FBgn0003963, Misc. feature: contig 2L_1_10 1..50000(1)
2L mapping	487557	SNV	1	C	T	37	100	35.7297	Gene: FBgn0003963, Misc. feature: contig 2L_1_10 1..50000(1)
2L mapping	487583	SNV	1	T	G	38	97.3684	35.1351	Gene: FBgn0003963, Misc. feature: contig 2L_1_10 1..50000(1)
2L mapping	487637	SNV	1	T	A	39	100	34.9231	Gene: FBgn0003963, Misc. feature: contig 2L_1_10 1..50000(1)
2L mapping	487762	SNV	1	G	A	39	100	35.3077	Gene: FBgn0003963, Misc. feature: contig 2L_1_10 1..50000(1)
2L mapping	488212	SNV	1	G	T	44	100	32.8636	Gene: FBgn0003963, Misc. feature: contig 2L_1_10 1..50000(1)
2L mapping	488234	SNV	1	A	T	44	100	33.1136	Gene: FBgn0003963, Misc. feature: contig 2L_1_10 1..50000(1)
2L mapping	488367	SNV	1	G	C	58	100	34.7759	Gene: FBgn0003963, Misc. feature: contig 2L_1_10 1..50000(1)
2L mapping	488495	Deletion	7	TACTCTA	-	42	73.8095	34.2903	Gene: FBgn0003963, Misc. feature: contig 2L_1_10 1..50000(1)
2L mapping	488639	SNV	1	C	A	47	100	34.0638	Gene: FBgn0003963, Misc. feature: contig 2L_1_10 1..50000(1)
2L mapping	488850	SNV	1	T	C	39	100	33.8205	Gene: FBgn0003963, Misc. feature: contig 2L_1_10 1..50000(1)
2L mapping	489107	SNV	1	T	A	38	94.7368	35.3333	Gene: FBgn0003963, Misc. feature: contig 2L_1_10 1..50000(1)
2L mapping	489249	SNV	1	T	C	48	100	33.6667	Gene: FBgn0003963, Misc. feature: contig 2L_1_10 1..50000(1)
2L mapping	489500	SNV	1	C	T	43	95.3488	35.8049	Gene: FBgn0003963, Misc. feature: contig 2L_1_10 1..50000(1)
2L mapping	489741	SNV	1	G	T	36	100	32.1389	Exon: Exon, Gene: FBgn0003963, Misc. feature: contig 2L_1_10 1..50000(1), mRNA: FBgn0003963
2L mapping	489853	SNV	1	C	T	43	100	35.1163	Exon: Exon, Gene: FBgn0003963, Misc. feature: contig 2L_1_10 1..50000(1), mRNA: FBgn0003963
2L mapping	489877	SNV	1	A	G	55	100	33.8182	Exon: Exon, Gene: FBgn0003963, Misc. feature: contig 2L_1_10 1..50000(1), mRNA: FBgn0003963
2L mapping	490087	SNV	1	C	G	48	100	35.5417	Exon: Exon, Gene: FBgn0003963, Misc. feature: contig 2L_1_10 1..50000(1), mRNA: FBgn0003963
2L mapping	490145	Insertion	3	-	ACA	50	86	36.0465	Exon: Exon, Gene: FBgn0003963, Misc. feature: contig 2L_1_10 1..50000(1), mRNA: FBgn0003963
2L mapping	490182	SNV	1	C	T	48	97.9167	35.5745	Exon: Exon, Gene: FBgn0003963, Misc. feature: contig 2L_1_10 1..50000(1), mRNA: FBgn0003963
2L mapping	490581	SNV	1	T	G	47	97.8723	34.8043	Exon: Exon, Gene: FBgn0003963, Misc. feature: contig 2L_1_10 1..50000(1), mRNA: FBgn0003963
2L mapping	490664	SNV	1	A	T	46	100	35.6087	Exon: Exon, Gene: FBgn0003963, Misc. feature: contig 2L_1_10 1..50000(1), mRNA: FBgn0003963
2L mapping	490666	SNV	1	A	C	46	97.8261	34.5333	Exon: Exon, Gene: FBgn0003963, Misc. feature: contig 2L_1_10 1..50000(1), mRNA: FBgn0003963
2L mapping	490743	SNV	1	T	C	49	75.5102	29.3243	Exon: Exon, Gene: FBgn0003963, Misc. feature: contig 2L_1_10 1..50000(1), mRNA: FBgn0003963
2L mapping	490745	SNV	1	C	T	49	81.6327	35.025	Exon: Exon, Gene: FBgn0003963, Misc. feature: contig 2L_1_10 1..50000(1), mRNA: FBgn0003963
2L mapping	490748	SNV	1	A	C	53	100	35.9623	Exon: Exon, Gene: FBgn0003963, Misc. feature: contig 2L_1_10 1..50000(1), mRNA: FBgn0003963
2L mapping	490759	Insertion	2	-	TA	47	63.8298	34.1833	Exon: Exon, Gene: FBgn0003963, Misc. feature: contig 2L_1_10 1..50000(1), mRNA: FBgn0003963
2L mapping	490770	SNV	1	T	C	34	100	34.2059	Exon: Exon, Gene: FBgn0003963, Misc. feature: contig 2L_1_10 1..50000(1), mRNA: FBgn0003963
2L mapping	490786	Deletion	1	G	-	34	97.0588	32.7879	Exon: Exon, Gene: FBgn0003963, Misc. feature: contig 2L_1_10 1..50000(1), mRNA: FBgn0003963
2L mapping	490939	SNV	1	A	T	36	100	33.9722	Exon: Exon, Exon: Exon, Gene: FBgn0003963, Misc. feature: contig 2L_1_10 1..50000(1), mRNA: FBgn0003963, mRNA: FBgn0003963
2L mapping	490987	SNV	1	G	T	39	97.4359	36	Exon: Exon, Exon: Exon, Gene: FBgn0003963, Misc. feature: contig 2L_1_10 1..50000(1), mRNA: FBgn0003963, mRNA: FBgn0003963
2L mapping	490995	SNV	1	A	T	38	100	33.3947	Exon: Exon, Exon: Exon, Gene: FBgn0003963, Misc. feature: contig 2L_1_10 1..50000(1), mRNA: FBgn0003963, mRNA: FBgn0003963
2L mapping	491097	SNV	1	G	A	33	100	35.5152	Exon: Exon, Exon: Exon, Gene: FBgn0003963, Misc. feature: contig 2L_1_10 1..50000(1), mRNA: FBgn0003963, mRNA: FBgn0003963
2L mapping	491364	SNV	1	C	T	42	100	35.5476	Gene: FBgn0003963, Misc. feature: contig 2L_1_10 1..50000(1)	FBpp0301730:c.[43+6C>T]; FBpp0305228:c.[43+6C>T]
2L mapping	491569	SNV	1	C	T	44	100	35.9545	Gene: FBgn0003963, Misc. feature: contig 2L_1_10 1..50000(1)	FBpp0301730:c.[43+211C>T]; FBpp0305228:c.[43+211C>T]
2L mapping	491703	Deletion	1	C	-	48	100	34.9375	Gene: FBgn0003963, Misc. feature: contig 2L_1_10 1..50000(1)	FBpp0301730:c.[43+345delC]; FBpp0305228:c.[43+345delC]
2L mapping	491714	SNV	1	T	G	55	100	34.7091	Gene: FBgn0003963, Misc. feature: contig 2L_1_10 1..50000(1)	FBpp0305228:c.[43+356T>G]; FBpp0301730:c.[43+356T>G]
2L mapping	491777	SNV	1	T	C	47	100	34.5532	Gene: FBgn0003963, Misc. feature: contig 2L_1_10 1..50000(1)	FBpp0305228:c.[43+419T>C]; FBpp0301730:c.[43+419T>C]
2L mapping	491785	Replacement	2	CG	A	45	100	34.5111	Gene: FBgn0003963, Misc. feature: contig 2L_1_10 1..50000(1)	FBpp0301730:c.[43+427_43+428delCGinsA]; FBpp0305228:c.[43+427_43+428delCGinsA]
2L mapping	491824	SNV	1	G	T	47	100	35.2979	Gene: FBgn0003963, Misc. feature: contig 2L_1_10 1..50000(1)	FBpp0301730:c.[43+466G>T]; FBpp0305228:c.[43+466G>T]
2L mapping	491866	SNV	1	C	A	48	100	34.375	Gene: FBgn0003963, Misc. feature: contig 2L_1_10 1..50000(1)	FBpp0301730:c.[43+508C>A]; FBpp0305228:c.[43+508C>A]
2L mapping	491870	SNV	1	G	C	48	100	34.375	Gene: FBgn0003963, Misc. feature: contig 2L_1_10 1..50000(1)	FBpp0305228:c.[43+512G>C]; FBpp0301730:c.[43+512G>C]
2L mapping	491883	SNV	1	T	A	49	100	36.1429	Gene: FBgn0003963, Misc. feature: contig 2L_1_10 1..50000(1)	FBpp0301730:c.[43+525T>A]; FBpp0305228:c.[43+525T>A]
2L mapping	492217	SNV	1	C	T	35	100	32.4	Gene: FBgn0003963, Misc. feature: contig 2L_1_10 1..50000(1)	FBpp0305228:c.[43+859C>T]; FBpp0301730:c.[43+859C>T]
2L mapping	492231	SNV	1	A	C	34	100	33.0588	Gene: FBgn0003963, Misc. feature: contig 2L_1_10 1..50000(1)	FBpp0301730:c.[43+873A>C]; FBpp0305228:c.[43+873A>C]
2L mapping	492267	SNV	1	T	C	41	100	34.6585	Gene: FBgn0003963, Misc. feature: contig 2L_1_10 1..50000(1)	FBpp0305228:c.[43+909T>C]; FBpp0301730:c.[43+909T>C]
2L mapping	492331	SNV	1	A	T	37	100	32.4054	Gene: FBgn0003963, Misc. feature: contig 2L_1_10 1..50000(1)	FBpp0305228:c.[43+973A>T]; FBpp0301730:c.[43+973A>T]
2L mapping	492383	SNV	1	C	T	37	100	33.8649	Gene: FBgn0003963, Misc. feature: contig 2L_1_10 1..50000(1)	FBpp0305228:c.[43+1025C>T]; FBpp0301730:c.[43+1025C>T]
2L mapping	492701	SNV	1	A	C	44	100	34	Gene: FBgn0003963, Misc. feature: contig 2L_1_10 1..50000(1)	FBpp0301730:c.[43+1343A>C]; FBpp0305228:c.[43+1343A>C]
2L mapping	492810	SNV	1	C	T	53	100	35.3774	Gene: FBgn0003963, Misc. feature: contig 2L_1_10 1..50000(1)	FBpp0305228:c.[43+1452C>T]; FBpp0301730:c.[43+1452C>T]
2L mapping	492829	SNV	1	C	G	53	100	35	Gene: FBgn0003963, Misc. feature: contig 2L_1_10 1..50000(1)	FBpp0305228:c.[43+1471C>G]; FBpp0301730:c.[43+1471C>G]
2L mapping	493004	Insertion	1	-	C	46	80.4348	33.8378	Gene: FBgn0003963, Misc. feature: contig 2L_1_10 1..50000(1)	FBpp0301730:c.[43+1645_43+1646insC]; FBpp0305228:c.[43+1645_43+1646insC]
2L mapping	493393	SNV	1	G	A	41	100	35.1951	Gene: FBgn0003963, Misc. feature: contig 2L_1_10 1..50000(1)	FBpp0305228:c.[43+2035G>A]; FBpp0301730:c.[43+2035G>A]
2L mapping	493401	SNV	1	T	A	36	100	35.7222	Gene: FBgn0003963, Misc. feature: contig 2L_1_10 1..50000(1)	FBpp0301730:c.[43+2043T>A]; FBpp0305228:c.[43+2043T>A]
2L mapping	493403	SNV	1	G	A	36	100	33.1944	Gene: FBgn0003963, Misc. feature: contig 2L_1_10 1..50000(1)	FBpp0301730:c.[43+2045G>A]; FBpp0305228:c.[43+2045G>A]
2L mapping	493408	SNV	1	G	T	36	100	34.1389	Gene: FBgn0003963, Misc. feature: contig 2L_1_10 1..50000(1)	FBpp0305228:c.[43+2050G>T]; FBpp0301730:c.[43+2050G>T]
2L mapping	493416	SNV	1	A	T	30	96.6667	35.2414	Gene: FBgn0003963, Misc. feature: contig 2L_1_10 1..50000(1)	FBpp0301730:c.[43+2058A>T]; FBpp0305228:c.[43+2058A>T]
2L mapping	493420	Replacement	7	AAAAAAA	G	29	58.6207	35.0588	Gene: FBgn0003963, Misc. feature: contig 2L_1_10 1..50000(1)	FBpp0305228:c.[43+2062_43+2068delAAAAAAAinsG]; FBpp0301730:c.[43+2062_43+2068delAAAAAAAinsG]
2L mapping	493448	SNV	1	A	T	46	100	35.1087	Gene: FBgn0003963, Misc. feature: contig 2L_1_10 1..50000(1)	FBpp0301730:c.[43+2090A>T]; FBpp0305228:c.[43+2090A>T]
2L mapping	493469	SNV	1	G	T	46	100	33.2609	Gene: FBgn0003963, Misc. feature: contig 2L_1_10 1..50000(1)	FBpp0305228:c.[43+2111G>T]; FBpp0301730:c.[43+2111G>T]
2L mapping	493472	SNV	1	A	G	44	100	29.6364	Gene: FBgn0003963, Misc. feature: contig 2L_1_10 1..50000(1)	FBpp0305228:c.[43+2114A>G]; FBpp0301730:c.[43+2114A>G]
2L mapping	493485	SNV	1	A	G	46	91.3043	32.6667	Gene: FBgn0003963, Misc. feature: contig 2L_1_10 1..50000(1)	FBpp0301730:c.[43+2127A>G]; FBpp0305228:c.[43+2127A>G]
2L mapping	493493	Deletion	1	G	-	44	93.1818	35.2683	Gene: FBgn0003963, Misc. feature: contig 2L_1_10 1..50000(1)	FBpp0305228:c.[43+2135delG]; FBpp0301730:c.[43+2135delG]
2L mapping	493504	MNV	2	CA	TT	43	97.6744	35.4643	Gene: FBgn0003963, Misc. feature: contig 2L_1_10 1..50000(1)	FBpp0301730:c.[43+2146_43+2147delCAinsTT]; FBpp0305228:c.[43+2146_43+2147delCAinsTT]
2L mapping	493518	SNV	1	A	T	47	100	34.9574	Gene: FBgn0003963, Misc. feature: contig 2L_1_10 1..50000(1)	FBpp0301730:c.[43+2160A>T]; FBpp0305228:c.[43+2160A>T]
2L mapping	493531	SNV	1	A	C	41	100	34.1463	Gene: FBgn0003963, Misc. feature: contig 2L_1_10 1..50000(1)	FBpp0305228:c.[43+2173A>C]; FBpp0301730:c.[43+2173A>C]
2L mapping	493550	SNV	1	G	A	38	100	35.8684	Gene: FBgn0003963, Misc. feature: contig 2L_1_10 1..50000(1)	FBpp0301730:c.[43+2192G>A]; FBpp0305228:c.[43+2192G>A]
2L mapping	493656	MNV	2	CG	TA	36	100	35.5139	Gene: FBgn0003963, Misc. feature: contig 2L_1_10 1..50000(1)	FBpp0301730:c.[43+2298_43+2299delCGinsTA]; FBpp0305228:c.[43+2298_43+2299delCGinsTA]
2L mapping	493701	SNV	1	T	G	33	100	35.1515	Gene: FBgn0003963, Misc. feature: contig 2L_1_10 1..50000(1)	FBpp0305228:c.[43+2343T>G]; FBpp0301730:c.[43+2343T>G]
2L mapping	493790	SNV	1	G	T	35	100	35.3429	Gene: FBgn0003963, Misc. feature: contig 2L_1_10 1..50000(1)	FBpp0305228:c.[43+2432G>T]; FBpp0301730:c.[43+2432G>T]
2L mapping	493865	SNV	1	A	G	26	100	33.4615	Gene: FBgn0003963, Misc. feature: contig 2L_1_10 1..50000(1)	FBpp0301730:c.[43+2507A>G]; FBpp0305228:c.[43+2507A>G]
2L mapping	493873	SNV	1	C	A	25	100	32.04	Gene: FBgn0003963, Misc. feature: contig 2L_1_10 1..50000(1)	FBpp0301730:c.[43+2515C>A]; FBpp0305228:c.[43+2515C>A]
2L mapping	493883	SNV	1	T	A	20	95	33.5263	Gene: FBgn0003963, Misc. feature: contig 2L_1_10 1..50000(1)	FBpp0305228:c.[43+2525T>A]; FBpp0301730:c.[43+2525T>A]
2L mapping	493891	Deletion	1	C	-	21	95.2381	31.3	Gene: FBgn0003963, Misc. feature: contig 2L_1_10 1..50000(1)	FBpp0301730:c.[43+2533delC]; FBpp0305228:c.[43+2533delC]
2L mapping	493899	Replacement	2	T	AA	19	94.7368	36.0278	Gene: FBgn0003963, Misc. feature: contig 2L_1_10 1..50000(1)	FBpp0305228:c.[43+2541delTinsAA]; FBpp0301730:c.[43+2541delTinsAA]
2L mapping	493917	SNV	1	A	G	21	100	36.4286	Gene: FBgn0003963, Misc. feature: contig 2L_1_10 1..50000(1)	FBpp0305228:c.[43+2559A>G]; FBpp0301730:c.[43+2559A>G]
2L mapping	493966	SNV	1	A	G	26	100	34.3077	Gene: FBgn0003963, Misc. feature: contig 2L_1_10 1..50000(1)	FBpp0305228:c.[43+2608A>G]; FBpp0301730:c.[43+2608A>G]
2L mapping	493968	SNV	1	A	C	26	96.1538	35.52	Gene: FBgn0003963, Misc. feature: contig 2L_1_10 1..50000(1)	FBpp0305228:c.[43+2610A>C]; FBpp0301730:c.[43+2610A>C]
2L mapping	493972	SNV	1	T	A	28	100	35.75	Gene: FBgn0003963, Misc. feature: contig 2L_1_10 1..50000(1)	FBpp0301730:c.[43+2614T>A]; FBpp0305228:c.[43+2614T>A]
2L mapping	494100	SNV	1	A	G	37	100	36.027	Gene: FBgn0003963, Misc. feature: contig 2L_1_10 1..50000(1)	FBpp0305228:c.[43+2742A>G]; FBpp0301730:c.[43+2742A>G]
2L mapping	494165	Insertion	4	-	GCCC	30	73.3333	35.6364	Gene: FBgn0003963, Misc. feature: contig 2L_1_10 1..50000(1)	FBpp0305228:c.[43+2806_43+2807insGCCC]; FBpp0301730:c.[43+2806_43+2807insGCCC]
2L mapping	494690	Insertion	1	-	A	39	35.8974	35.2857	Gene: FBgn0003963, Misc. feature: contig 2L_1_10 1..50000(1)	FBpp0305228:c.[43+3331_43+3332insA]; FBpp0301730:c.[43+3331_43+3332insA]
2L mapping	494718	SNV	1	G	A	33	84.8485	35.75	Gene: FBgn0003963, Misc. feature: contig 2L_1_10 1..50000(1)	FBpp0301730:c.[43+3360G>A]; FBpp0305228:c.[43+3360G>A]
2L mapping	494721	SNV	1	A	G	35	88.5714	33.9032	Gene: FBgn0003963, Misc. feature: contig 2L_1_10 1..50000(1)	FBpp0305228:c.[43+3363A>G]; FBpp0301730:c.[43+3363A>G]
2L mapping	494728	SNV	1	A	G	36	100	31.6667	Gene: FBgn0003963, Misc. feature: contig 2L_1_10 1..50000(1)	FBpp0305228:c.[43+3370A>G]; FBpp0301730:c.[43+3370A>G]
2L mapping	494732	SNV	1	T	C	37	100	33.1081	Gene: FBgn0003963, Misc. feature: contig 2L_1_10 1..50000(1)	FBpp0301730:c.[43+3374T>C]; FBpp0305228:c.[43+3374T>C]
2L mapping	494767	SNV	1	A	T	45	100	35.8667	Gene: FBgn0003963, Misc. feature: contig 2L_1_10 1..50000(1)	FBpp0301730:c.[43+3409A>T]; FBpp0305228:c.[43+3409A>T]
2L mapping	494769	SNV	1	C	T	45	100	36.1778	Gene: FBgn0003963, Misc. feature: contig 2L_1_10 1..50000(1)	FBpp0301730:c.[43+3411C>T]; FBpp0305228:c.[43+3411C>T]
2L mapping	494853	Deletion	1	C	-	19	94.7368	34.4444	Gene: FBgn0003963, Misc. feature: contig 2L_1_10 1..50000(1)	FBpp0301730:c.[43+3495delC]; FBpp0305228:c.[43+3495delC]
2L mapping	494855	Deletion	9	TTTAAGTTT	-	18	100	35.5	Gene: FBgn0003963, Misc. feature: contig 2L_1_10 1..50000(1)	FBpp0301730:c.[43+3497_43+3505delTTTAAGTTT]; FBpp0305228:c.[43+3497_43+3505delTTTAAGTTT]
2L mapping	495064	Deletion	2	TT	-	53	73.5849	36.6923	Gene: FBgn0003963, Misc. feature: contig 2L_1_10 1..50000(1)	FBpp0305228:c.[43+3706_43+3707delTT]; FBpp0301730:c.[43+3706_43+3707delTT]
2L mapping	495162	SNV	1	T	C	41	100	35.9268	Gene: FBgn0003963, Misc. feature: contig 2L_1_10 1..50000(1)	FBpp0301730:c.[43+3804T>C]; FBpp0305228:c.[43+3804T>C]
2L mapping	495220	SNV	1	A	C	38	100	35.9737	Gene: FBgn0003963, Misc. feature: contig 2L_1_10 1..50000(1)	FBpp0301730:c.[43+3862A>C]; FBpp0305228:c.[43+3862A>C]
2L mapping	495253	SNV	1	T	A	42	100	35.381	Gene: FBgn0003963, Misc. feature: contig 2L_1_10 1..50000(1)	FBpp0305228:c.[43+3895T>A]; FBpp0301730:c.[43+3895T>A]
2L mapping	495458	SNV	1	C	T	38	100	34.4474	Gene: FBgn0003963, Misc. feature: contig 2L_1_10 1..50000(1)	FBpp0301730:c.[43+4100C>T]; FBpp0305228:c.[43+4100C>T]
2L mapping	495512	SNV	1	G	T	35	94.2857	35.0909	Gene: FBgn0003963, Misc. feature: contig 2L_1_10 1..50000(1)	FBpp0305228:c.[43+4154G>T]; FBpp0301730:c.[43+4154G>T]
2L mapping	495580	SNV	1	G	A	36	100	34.3611	Gene: FBgn0003963, Misc. feature: contig 2L_1_10 1..50000(1)	FBpp0301730:c.[43+4222G>A]; FBpp0305228:c.[43+4222G>A]
2L mapping	495599	SNV	1	C	T	39	100	34.8974	Gene: FBgn0003963, Misc. feature: contig 2L_1_10 1..50000(1)	FBpp0301730:c.[43+4241C>T]; FBpp0305228:c.[43+4241C>T]
2L mapping	495614	SNV	1	C	T	34	100	33.6471	Gene: FBgn0003963, Misc. feature: contig 2L_1_10 1..50000(1)	FBpp0301730:c.[43+4256C>T]; FBpp0305228:c.[43+4256C>T]
2L mapping	495810	SNV	1	C	G	41	100	35.561	Gene: FBgn0003963, Misc. feature: contig 2L_1_10 1..50000(1)	FBpp0305228:c.[43+4452C>G]; FBpp0301730:c.[43+4452C>G]
2L mapping	495979	SNV	1	T	C	40	100	36.35	Gene: FBgn0003963, Misc. feature: contig 2L_1_10 1..50000(1)	FBpp0305228:c.[43+4621T>C]; FBpp0301730:c.[43+4621T>C]
2L mapping	496308	SNV	1	A	T	27	100	36.1852	Gene: FBgn0003963, Misc. feature: contig 2L_1_10 1..50000(1)	FBpp0305228:c.[43+4950A>T]; FBpp0301730:c.[43+4950A>T]
2L mapping	496321	MNV	2	AC	GT	60	55	34.4848	Gene: FBgn0003963, Misc. feature: contig 2L_1_10 1..50000(1)	FBpp0305228:c.[43+4963_43+4964delACinsGT]; FBpp0301730:c.[43+4963_43+4964delACinsGT]
2L mapping	496322	SNV	1	C	T	60	45	35.4074	Gene: FBgn0003963, Misc. feature: contig 2L_1_10 1..50000(1)	FBpp0305228:c.[43+4964C>T]; FBpp0301730:c.[43+4964C>T]
2L mapping	496329	SNV	1	G	A	63	57.1429	35.3333	Gene: FBgn0003963, Misc. feature: contig 2L_1_10 1..50000(1)	FBpp0301730:c.[43+4971G>A]; FBpp0305228:c.[43+4971G>A]
2L mapping	496340	SNV	1	A	T	65	40	35.0385	Gene: FBgn0003963, Misc. feature: contig 2L_1_10 1..50000(1)	FBpp0301730:c.[43+4982A>T]; FBpp0305228:c.[43+4982A>T]
2L mapping	496446	SNV	1	A	T	33	100	35.9091	Gene: FBgn0003963, Misc. feature: contig 2L_1_10 1..50000(1)	FBpp0305228:c.[43+5088A>T]; FBpp0301730:c.[43+5088A>T]
2L mapping	496492	Deletion	1	A	-	46	91.3043	34.4286	Gene: FBgn0003963, Misc. feature: contig 2L_1_10 1..50000(1)	FBpp0301730:c.[43+5134delA]; FBpp0305228:c.[43+5134delA]
2L mapping	496505	SNV	1	A	G	40	100	34.425	Gene: FBgn0003963, Misc. feature: contig 2L_1_10 1..50000(1)	FBpp0305228:c.[43+5147A>G]; FBpp0301730:c.[43+5147A>G]
2L mapping	496801	SNV	1	A	C	12	100	32.4167	Gene: FBgn0003963, Misc. feature: contig 2L_1_10 1..50000(1)	FBpp0305228:c.[43+5443A>C]; FBpp0301730:c.[43+5443A>C]
2L mapping	496830	SNV	1	T	C	12	100	34.5	Gene: FBgn0003963, Misc. feature: contig 2L_1_10 1..50000(1)	FBpp0301730:c.[43+5472T>C]; FBpp0305228:c.[43+5472T>C]
2L mapping	497026	Insertion	8	-	CGTCTGTC	37	43.2432	35.0625	Gene: FBgn0003963, Misc. feature: contig 2L_1_10 1..50000(1)	FBpp0305228:c.[43+5667_43+5668insCGTCTGTC]; FBpp0301730:c.[43+5667_43+5668insCGTCTGTC]
2L mapping	497404	MNV	2	TA	AG	30	100	34.95	Gene: FBgn0003963, Misc. feature: contig 2L_1_10 1..50000(1)	FBpp0301730:c.[43+6046_43+6047delTAinsAG]; FBpp0305228:c.[43+6046_43+6047delTAinsAG]
2L mapping	497421	SNV	1	T	A	29	100	34.5862	Gene: FBgn0003963, Misc. feature: contig 2L_1_10 1..50000(1)	FBpp0305228:c.[43+6063T>A]; FBpp0301730:c.[43+6063T>A]
2L mapping	497432	SNV	1	T	A	29	100	34.7931	Gene: FBgn0003963, Misc. feature: contig 2L_1_10 1..50000(1)	FBpp0305228:c.[43+6074T>A]; FBpp0301730:c.[43+6074T>A]
2L mapping	497439	SNV	1	A	C	33	100	35.6364	Gene: FBgn0003963, Misc. feature: contig 2L_1_10 1..50000(1)	FBpp0305228:c.[43+6081A>C]; FBpp0301730:c.[43+6081A>C]
2L mapping	497441	SNV	1	C	T	33	100	35.5152	Gene: FBgn0003963, Misc. feature: contig 2L_1_10 1..50000(1)	FBpp0301730:c.[43+6083C>T]; FBpp0305228:c.[43+6083C>T]
2L mapping	497447	SNV	1	T	A	37	97.2973	34.6667	Gene: FBgn0003963, Misc. feature: contig 2L_1_10 1..50000(1)	FBpp0305228:c.[43+6089T>A]; FBpp0301730:c.[43+6089T>A]
2L mapping	497537	SNV	1	C	T	23	100	35.3043	Gene: FBgn0003963, Misc. feature: contig 2L_1_10 1..50000(1)	FBpp0301730:c.[43+6179C>T]; FBpp0305228:c.[43+6179C>T]
2L mapping	497560	SNV	1	C	T	32	100	36.0625	Gene: FBgn0003963, Misc. feature: contig 2L_1_10 1..50000(1)	FBpp0301730:c.[43+6202C>T]; FBpp0305228:c.[43+6202C>T]
2L mapping	497597	SNV	1	C	T	42	100	35.7381	Gene: FBgn0003963, Misc. feature: contig 2L_1_10 1..50000(1)	FBpp0301730:c.[43+6239C>T]; FBpp0305228:c.[43+6239C>T]
2L mapping	497766	SNV	1	T	C	38	100	35.6842	Gene: FBgn0003963, Misc. feature: contig 2L_1_10 1..50000(1)	FBpp0301730:c.[43+6408T>C]; FBpp0305228:c.[43+6408T>C]
2L mapping	497838	SNV	1	T	G	36	100	34.8333	Gene: FBgn0003963, Misc. feature: contig 2L_1_10 1..50000(1)	FBpp0305228:c.[43+6480T>G]; FBpp0301730:c.[43+6480T>G]
2L mapping	497840	SNV	1	A	G	36	100	34.5833	Gene: FBgn0003963, Misc. feature: contig 2L_1_10 1..50000(1)	FBpp0305228:c.[43+6482A>G]; FBpp0301730:c.[43+6482A>G]
2L mapping	498252	SNV	1	C	T	38	100	33.0263	Gene: FBgn0003963, Misc. feature: contig 2L_1_10 1..50000(1)	FBpp0305228:c.[43+6894C>T]; FBpp0301730:c.[43+6894C>T]
2L mapping	498259	SNV	1	A	G	38	100	35.7105	Gene: FBgn0003963, Misc. feature: contig 2L_1_10 1..50000(1)	FBpp0305228:c.[43+6901A>G]; FBpp0301730:c.[43+6901A>G]
2L mapping	498266	SNV	1	T	A	40	100	35.175	Gene: FBgn0003963, Misc. feature: contig 2L_1_10 1..50000(1)	FBpp0305228:c.[43+6908T>A]; FBpp0301730:c.[43+6908T>A]
2L mapping	498822	SNV	1	T	G	39	100	34.359	Gene: FBgn0003963, Misc. feature: contig 2L_1_10 1..50000(1)	FBpp0305228:c.[43+7464T>G]; FBpp0301730:c.[43+7464T>G]
2L mapping	498864	SNV	1	G	A	41	100	34.5854	Gene: FBgn0003963, Misc. feature: contig 2L_1_10 1..50000(1)	FBpp0301730:c.[43+7506G>A]; FBpp0305228:c.[43+7506G>A]
2L mapping	498964	Deletion	2	AA	-	42	97.619	31.8049	Gene: FBgn0003963, Misc. feature: contig 2L_1_10 1..50000(1)	FBpp0305228:c.[43+7606_43+7607delAA]; FBpp0301730:c.[43+7606_43+7607delAA]
2L mapping	499232	SNV	1	C	A	41	100	35.8049	Gene: FBgn0003963, Misc. feature: contig 2L_1_10 1..50000(1)	FBpp0305228:c.[43+7874C>A]; FBpp0301730:c.[43+7874C>A]
2L mapping	499256	MNV	2	GG	AA	44	100	33.7273	Gene: FBgn0003963, Misc. feature: contig 2L_1_10 1..50000(1)	FBpp0305228:c.[43+7898_43+7899delGGinsAA]; FBpp0301730:c.[43+7898_43+7899delGGinsAA]
2L mapping	499276	SNV	1	A	G	38	100	34.8947	Gene: FBgn0003963, Misc. feature: contig 2L_1_10 1..50000(1)	FBpp0301730:c.[43+7918A>G]; FBpp0305228:c.[43+7918A>G]
2L mapping	499575	SNV	1	A	T	37	100	36.5676	Gene: FBgn0003963, Misc. feature: contig 2L_1_10 1..50000(1)	FBpp0301730:c.[43+8217A>T]; FBpp0305228:c.[43+8217A>T]
2L mapping	499660	SNV	1	A	T	50	98	34.8163	Gene: FBgn0003963, Misc. feature: contig 2L_1_10 1..50000(1)	FBpp0301730:c.[43+8302A>T]; FBpp0305228:c.[43+8302A>T]
2L mapping	499702	SNV	1	T	A	49	100	35.2449	Gene: FBgn0003963, Misc. feature: contig 2L_1_10 1..50000(1)	FBpp0305228:c.[43+8344T>A]; FBpp0301730:c.[43+8344T>A]
2L mapping	499705	SNV	1	C	T	48	100	35.6875	Gene: FBgn0003963, Misc. feature: contig 2L_1_10 1..50000(1)	FBpp0301730:c.[43+8347C>T]; FBpp0305228:c.[43+8347C>T]
2L mapping	499716	SNV	1	T	C	42	100	35.6905	Gene: FBgn0003963, Misc. feature: contig 2L_1_10 1..50000(1)	FBpp0301730:c.[43+8358T>C]; FBpp0305228:c.[43+8358T>C]
2L mapping	499719	SNV	1	C	T	40	100	35.575	Gene: FBgn0003963, Misc. feature: contig 2L_1_10 1..50000(1)	FBpp0301730:c.[43+8361C>T]; FBpp0305228:c.[43+8361C>T]
2L mapping	499753	SNV	1	A	G	37	100	35.2432	Gene: FBgn0003963, Misc. feature: contig 2L_1_10 1..50000(1)	FBpp0301730:c.[43+8395A>G]; FBpp0305228:c.[43+8395A>G]
2L mapping	499771	SNV	1	A	G	38	100	35.0789	Gene: FBgn0003963, Misc. feature: contig 2L_1_10 1..50000(1)	FBpp0301730:c.[43+8413A>G]; FBpp0305228:c.[43+8413A>G]
2L mapping	499919	SNV	1	C	G	36	100	35.3889	Gene: FBgn0003963, Misc. feature: contig 2L_1_10 1..50000(1)	FBpp0305228:c.[43+8561C>G]; FBpp0301730:c.[43+8561C>G]
2L mapping	499921	SNV	1	C	A	36	100	36.2778	Gene: FBgn0003963, Misc. feature: contig 2L_1_10 1..50000(1)	FBpp0305228:c.[43+8563C>A]; FBpp0301730:c.[43+8563C>A]
2L mapping	500496	SNV	1	C	T	25	100	35.56	Gene: FBgn0003963, Misc. feature: contig 2L_1_11 1..50000(1)	FBpp0301730:c.[43+9138C>T]; FBpp0305228:c.[43+9138C>T]
2L mapping	500779	SNV	1	A	C	38	100	35.1579	Gene: FBgn0003963, Misc. feature: contig 2L_1_11 1..50000(1)	FBpp0305228:c.[43+9421A>C]; FBpp0301730:c.[43+9421A>C]
2L mapping	500819	Insertion	1	-	A	34	82.3529	36.6429	Gene: FBgn0003963, Misc. feature: contig 2L_1_11 1..50000(1)	FBpp0305228:c.[43+9460_43+9461insA]; FBpp0301730:c.[43+9460_43+9461insA]
2L mapping	500820	SNV	1	G	A	28	100	35.8214	Gene: FBgn0003963, Misc. feature: contig 2L_1_11 1..50000(1)	FBpp0301730:c.[43+9462G>A]; FBpp0305228:c.[43+9462G>A]
2L mapping	500822	Insertion	1	-	A	28	100	35.8571	Gene: FBgn0003963, Misc. feature: contig 2L_1_11 1..50000(1)	FBpp0301730:c.[43+9463_43+9464insA]; FBpp0305228:c.[43+9463_43+9464insA]
2L mapping	500850	SNV	1	T	G	35	100	34.0571	Gene: FBgn0003963, Misc. feature: contig 2L_1_11 1..50000(1)	FBpp0301730:c.[43+9492T>G]; FBpp0305228:c.[43+9492T>G]
2L mapping	500922	SNV	1	T	C	36	97.2222	34.9143	Gene: FBgn0003963, Misc. feature: contig 2L_1_11 1..50000(1)	FBpp0301730:c.[43+9564T>C]; FBpp0305228:c.[43+9564T>C]
2L mapping	501040	SNV	1	T	G	34	100	34.8235	Gene: FBgn0003963, Misc. feature: contig 2L_1_11 1..50000(1)	FBpp0301730:c.[43+9682T>G]; FBpp0305228:c.[43+9682T>G]
2L mapping	501279	SNV	1	G	A	23	95.6522	33.9091	Gene: FBgn0003963, Misc. feature: contig 2L_1_11 1..50000(1)	FBpp0305228:c.[43+9921G>A]; FBpp0301730:c.[43+9921G>A]
2L mapping	501301	SNV	1	C	T	21	100	31.9048	Gene: FBgn0003963, Misc. feature: contig 2L_1_11 1..50000(1)	FBpp0301730:c.[43+9943C>T]; FBpp0305228:c.[43+9943C>T]
2L mapping	501310	Insertion	1	-	T	19	42.1053	36.5	Gene: FBgn0003963, Misc. feature: contig 2L_1_11 1..50000(1)	FBpp0301730:c.[43+9951_43+9952insT]; FBpp0305228:c.[43+9951_43+9952insT]
2L mapping	501396	MNV	2	CT	AC	46	100	33.0543	Gene: FBgn0003963, Misc. feature: contig 2L_1_11 1..50000(1)	FBpp0305228:c.[43+10038_43+10039delCTinsAC]; FBpp0301730:c.[43+10038_43+10039delCTinsAC]
2L mapping	501402	MNV	2	TC	GT	44	97.7273	34.9302	Gene: FBgn0003963, Misc. feature: contig 2L_1_11 1..50000(1)	FBpp0301730:c.[43+10044_43+10045delTCinsGT]; FBpp0305228:c.[43+10044_43+10045delTCinsGT]
2L mapping	501408	SNV	1	G	A	47	100	32.3404	Gene: FBgn0003963, Misc. feature: contig 2L_1_11 1..50000(1)	FBpp0301730:c.[43+10050G>A]; FBpp0305228:c.[43+10050G>A]
2L mapping	501427	SNV	1	C	A	35	100	35.5714	Gene: FBgn0003963, Misc. feature: contig 2L_1_11 1..50000(1)	FBpp0305228:c.[43+10069C>A]; FBpp0301730:c.[43+10069C>A]
2L mapping	501530	SNV	1	G	T	41	100	34.0976	Gene: FBgn0003963, Misc. feature: contig 2L_1_11 1..50000(1)	FBpp0301730:c.[43+10172G>T]; FBpp0305228:c.[43+10172G>T]
2L mapping	501834	SNV	1	T	C	32	100	34.8125	Gene: FBgn0003963, Misc. feature: contig 2L_1_11 1..50000(1)	FBpp0301730:c.[43+10476T>C]; FBpp0305228:c.[43+10476T>C]
2L mapping	501836	SNV	1	T	C	32	100	36.125	Gene: FBgn0003963, Misc. feature: contig 2L_1_11 1..50000(1)	FBpp0301730:c.[43+10478T>C]; FBpp0305228:c.[43+10478T>C]
2L mapping	501846	Deletion	4	GAGC	-	33	54.5455	34.1667	Gene: FBgn0003963, Misc. feature: contig 2L_1_11 1..50000(1)	FBpp0305228:c.[43+10488_43+10491delGAGC]; FBpp0301730:c.[43+10488_43+10491delGAGC]
2L mapping	501849	SNV	1	C	A	33	39.3939	33.1538	Gene: FBgn0003963, Misc. feature: contig 2L_1_11 1..50000(1)	FBpp0305228:c.[43+10491C>A]; FBpp0301730:c.[43+10491C>A]
2L mapping	501991	SNV	1	C	A	42	100	33	Gene: FBgn0003963, Misc. feature: contig 2L_1_11 1..50000(1)	FBpp0301730:c.[43+10633C>A]; FBpp0305228:c.[43+10633C>A]
2L mapping	502618	SNV	1	T	C	25	100	34.12	Gene: FBgn0003963, Misc. feature: contig 2L_1_11 1..50000(1)	FBpp0301730:c.[43+11260T>C]; FBpp0305228:c.[43+11260T>C]
2L mapping	503357	SNV	1	A	G	38	100	35.4474	Gene: FBgn0003963, Misc. feature: contig 2L_1_11 1..50000(1)	FBpp0305228:c.[43+11999A>G]; FBpp0301730:c.[43+11999A>G]
2L mapping	503551	SNV	1	G	A	43	100	36.3023	Gene: FBgn0003963, Misc. feature: contig 2L_1_11 1..50000(1)	FBpp0301730:c.[43+12193G>A]; FBpp0305228:c.[43+12193G>A]
2L mapping	503577	SNV	1	C	G	44	100	36.3182	Gene: FBgn0003963, Misc. feature: contig 2L_1_11 1..50000(1)	FBpp0305228:c.[43+12219C>G]; FBpp0301730:c.[43+12219C>G]
2L mapping	503589	SNV	1	G	T	43	100	35.6512	Gene: FBgn0003963, Misc. feature: contig 2L_1_11 1..50000(1)	FBpp0301730:c.[43+12231G>T]; FBpp0305228:c.[43+12231G>T]
2L mapping	503619	SNV	1	T	A	48	100	34.3333	Gene: FBgn0003963, Misc. feature: contig 2L_1_11 1..50000(1)	FBpp0301730:c.[43+12261T>A]; FBpp0305228:c.[43+12261T>A]
2L mapping	503627	SNV	1	A	T	44	100	34.25	Gene: FBgn0003963, Misc. feature: contig 2L_1_11 1..50000(1)	FBpp0301730:c.[43+12269A>T]; FBpp0305228:c.[43+12269A>T]
2L mapping	503660	SNV	1	T	A	39	94.8718	36.2432	Gene: FBgn0003963, Misc. feature: contig 2L_1_11 1..50000(1)	FBpp0305228:c.[43+12302T>A]; FBpp0301730:c.[43+12302T>A]
2L mapping	503679	SNV	1	C	A	40	100	33.225	Gene: FBgn0003963, Misc. feature: contig 2L_1_11 1..50000(1)	FBpp0305228:c.[43+12321C>A]; FBpp0301730:c.[43+12321C>A]
2L mapping	503686	SNV	1	A	C	39	100	34.7692	Gene: FBgn0003963, Misc. feature: contig 2L_1_11 1..50000(1)	FBpp0305228:c.[43+12328A>C]; FBpp0301730:c.[43+12328A>C]
2L mapping	503730	SNV	1	A	T	38	100	34.2368	Gene: FBgn0003963, Misc. feature: contig 2L_1_11 1..50000(1)	FBpp0301730:c.[43+12372A>T]; FBpp0305228:c.[43+12372A>T]
2L mapping	503985	Insertion	6	-	GTGTGA	39	53.8462	36.246	Gene: FBgn0003963, Misc. feature: contig 2L_1_11 1..50000(1)	FBpp0301730:c.[43+12626_43+12627insGTGTGA]; FBpp0305228:c.[43+12626_43+12627insGTGTGA]
2L mapping	504107	SNV	1	A	G	31	96.7742	34.8	Gene: FBgn0003963, Misc. feature: contig 2L_1_11 1..50000(1)	FBpp0305228:c.[43+12749A>G]; FBpp0301730:c.[43+12749A>G]
2L mapping	504276	SNV	1	T	A	35	100	36.6	Gene: FBgn0003963, Misc. feature: contig 2L_1_11 1..50000(1)	FBpp0301730:c.[43+12918T>A]; FBpp0305228:c.[43+12918T>A]
2L mapping	504295	MNV	2	GG	AT	37	100	34.0946	Gene: FBgn0003963, Misc. feature: contig 2L_1_11 1..50000(1)	FBpp0301730:c.[43+12937_43+12938delGGinsAT]; FBpp0305228:c.[43+12937_43+12938delGGinsAT]
2L mapping	504299	SNV	1	G	A	37	97.2973	35.0556	Gene: FBgn0003963, Misc. feature: contig 2L_1_11 1..50000(1)	FBpp0301730:c.[43+12941G>A]; FBpp0305228:c.[43+12941G>A]
2L mapping	504302	Insertion	1	-	T	37	97.2973	36.0556	Gene: FBgn0003963, Misc. feature: contig 2L_1_11 1..50000(1)	FBpp0305228:c.[43+12943_43+12944insT]; FBpp0301730:c.[43+12943_43+12944insT]
2L mapping	504449	SNV	1	G	C	34	97.0588	35.8485	Gene: FBgn0003963, Misc. feature: contig 2L_1_11 1..50000(1)	FBpp0301730:c.[43+13091G>C]; FBpp0305228:c.[43+13091G>C]
2L mapping	504462	SNV	1	A	C	41	97.561	35.625	Gene: FBgn0003963, Misc. feature: contig 2L_1_11 1..50000(1)	FBpp0301730:c.[43+13104A>C]; FBpp0305228:c.[43+13104A>C]
2L mapping	504521	SNV	1	T	G	51	100	34.3725	Gene: FBgn0003963, Misc. feature: contig 2L_1_11 1..50000(1)	FBpp0305228:c.[43+13163T>G]; FBpp0301730:c.[43+13163T>G]
2L mapping	504690	SNV	1	A	G	46	100	35.5217	Gene: FBgn0003963, Misc. feature: contig 2L_1_11 1..50000(1)	FBpp0301730:c.[43+13332A>G]; FBpp0305228:c.[43+13332A>G]
2L mapping	504855	Insertion	1	-	G	42	35.7143	34.4667	Gene: FBgn0003963, Misc. feature: contig 2L_1_11 1..50000(1)	FBpp0301730:c.[43+13496_43+13497insG]; FBpp0305228:c.[43+13496_43+13497insG]
2L mapping	504857	SNV	1	C	A	45	40	33.8333	Gene: FBgn0003963, Misc. feature: contig 2L_1_11 1..50000(1)	FBpp0305228:c.[43+13499C>A]; FBpp0301730:c.[43+13499C>A]
2L mapping	504861	Insertion	1	-	A	31	100	35.2581	Gene: FBgn0003963, Misc. feature: contig 2L_1_11 1..50000(1)	FBpp0301730:c.[43+13502_43+13503insA]; FBpp0305228:c.[43+13502_43+13503insA]
2L mapping	504880	SNV	1	C	T	40	100	33.9	Gene: FBgn0003963, Misc. feature: contig 2L_1_11 1..50000(1)	FBpp0301730:c.[43+13522C>T]; FBpp0305228:c.[43+13522C>T]
2L mapping	504941	SNV	1	C	T	38	100	35.7632	Gene: FBgn0003963, Misc. feature: contig 2L_1_11 1..50000(1)	FBpp0305228:c.[43+13583C>T]; FBpp0301730:c.[43+13583C>T]
2L mapping	504950	SNV	1	G	A	41	100	35.2439	Gene: FBgn0003963, Misc. feature: contig 2L_1_11 1..50000(1)	FBpp0305228:c.[43+13592G>A]; FBpp0301730:c.[43+13592G>A]
2L mapping	504959	SNV	1	C	G	43	100	34.5814	Gene: FBgn0003963, Misc. feature: contig 2L_1_11 1..50000(1)	FBpp0301730:c.[43+13601C>G]; FBpp0305228:c.[43+13601C>G]
2L mapping	504989	SNV	1	C	T	45	100	34.9111	Gene: FBgn0003963, Misc. feature: contig 2L_1_11 1..50000(1)	FBpp0305228:c.[43+13631C>T]; FBpp0301730:c.[43+13631C>T]
2L mapping	505231	Insertion	1	-	T	33	45.4545	33.6667	Gene: FBgn0003963, Misc. feature: contig 2L_1_11 1..50000(1)	FBpp0305228:c.[43+13872_43+13873insT]; FBpp0301730:c.[43+13872_43+13873insT]
2L mapping	505238	SNV	1	G	T	36	69.4444	36.36	Gene: FBgn0003963, Misc. feature: contig 2L_1_11 1..50000(1)	FBpp0301730:c.[43+13880G>T]; FBpp0305228:c.[43+13880G>T]
2L mapping	505293	Insertion	1	-	G	28	96.4286	34.9259	Gene: FBgn0003963, Misc. feature: contig 2L_1_11 1..50000(1)	FBpp0305228:c.[43+13934_43+13935insG]; FBpp0301730:c.[43+13934_43+13935insG]
2L mapping	505402	SNV	1	C	T	37	100	36.1892	Gene: FBgn0003963, Misc. feature: contig 2L_1_11 1..50000(1)	FBpp0305228:c.[43+14044C>T]; FBpp0301730:c.[43+14044C>T]
2L mapping	505440	SNV	1	T	A	37	100	33.4865	Gene: FBgn0003963, Misc. feature: contig 2L_1_11 1..50000(1)	FBpp0305228:c.[43+14082T>A]; FBpp0301730:c.[43+14082T>A]
2L mapping	505648	SNV	1	C	G	38	100	34.9474	Gene: FBgn0003963, Misc. feature: contig 2L_1_11 1..50000(1)	FBpp0305228:c.[43+14290C>G]; FBpp0301730:c.[43+14290C>G]
2L mapping	505733	SNV	1	C	T	54	100	35.3704	Gene: FBgn0003963, Misc. feature: contig 2L_1_11 1..50000(1)	FBpp0305228:c.[43+14375C>T]; FBpp0301730:c.[43+14375C>T]
2L mapping	505829	SNV	1	T	G	49	100	35.8776	Gene: FBgn0003963, Misc. feature: contig 2L_1_11 1..50000(1)	FBpp0305228:c.[43+14471T>G]; FBpp0301730:c.[43+14471T>G]
2L mapping	506088	SNV	1	G	C	48	100	34.9375	Gene: FBgn0003963, Misc. feature: contig 2L_1_11 1..50000(1)	FBpp0301730:c.[43+14730G>C]; FBpp0305228:c.[43+14730G>C]
2L mapping	506116	SNV	1	C	T	42	95.2381	35.075	Gene: FBgn0003963, Misc. feature: contig 2L_1_11 1..50000(1)	FBpp0301730:c.[43+14758C>T]; FBpp0305228:c.[43+14758C>T]
2L mapping	506125	SNV	1	G	A	37	97.2973	31.5833	Gene: FBgn0003963, Misc. feature: contig 2L_1_11 1..50000(1)	FBpp0305228:c.[43+14767G>A]; FBpp0301730:c.[43+14767G>A]
2L mapping	506129	Insertion	4	-	TTTT	33	51.5152	35.0147	Gene: FBgn0003963, Misc. feature: contig 2L_1_11 1..50000(1)	FBpp0301730:c.[43+14770_43+14771insTTTT]; FBpp0305228:c.[43+14770_43+14771insTTTT]
2L mapping	506158	SNV	1	C	T	39	94.8718	32.973	Gene: FBgn0003963, Misc. feature: contig 2L_1_11 1..50000(1)	FBpp0305228:c.[43+14800C>T]; FBpp0301730:c.[43+14800C>T]
2L mapping	506175	Deletion	1	A	-	46	86.9565	34	Gene: FBgn0003963, Misc. feature: contig 2L_1_11 1..50000(1)	FBpp0301730:c.[43+14817delA]; FBpp0305228:c.[43+14817delA]
2L mapping	506497	SNV	1	G	T	38	100	34.9474	Gene: FBgn0003963, Misc. feature: contig 2L_1_11 1..50000(1)	FBpp0301730:c.[43+15139G>T]; FBpp0305228:c.[43+15139G>T]
2L mapping	506999	SNV	1	C	G	40	100	34.35	Gene: FBgn0003963, Misc. feature: contig 2L_1_11 1..50000(1)	FBpp0301730:c.[43+15641C>G]; FBpp0305228:c.[43+15641C>G]
2L mapping	507013	SNV	1	G	T	33	100	35.4545	Gene: FBgn0003963, Misc. feature: contig 2L_1_11 1..50000(1)	FBpp0305228:c.[43+15655G>T]; FBpp0301730:c.[43+15655G>T]
2L mapping	507017	SNV	1	T	G	34	100	35.5588	Gene: FBgn0003963, Misc. feature: contig 2L_1_11 1..50000(1)	FBpp0305228:c.[43+15659T>G]; FBpp0301730:c.[43+15659T>G]
2L mapping	507075	SNV	1	T	A	37	100	36	Gene: FBgn0003963, Misc. feature: contig 2L_1_11 1..50000(1)	FBpp0305228:c.[43+15717T>A]; FBpp0301730:c.[43+15717T>A]
2L mapping	507102	SNV	1	G	C	41	97.561	34.4	Gene: FBgn0003963, Misc. feature: contig 2L_1_11 1..50000(1)	FBpp0301730:c.[43+15744G>C]; FBpp0305228:c.[43+15744G>C]
2L mapping	507114	SNV	1	A	T	43	100	34.8605	Gene: FBgn0003963, Misc. feature: contig 2L_1_11 1..50000(1)	FBpp0301730:c.[43+15756A>T]; FBpp0305228:c.[43+15756A>T]
2L mapping	507128	SNV	1	G	A	40	100	35.875	Gene: FBgn0003963, Misc. feature: contig 2L_1_11 1..50000(1)	FBpp0301730:c.[43+15770G>A]; FBpp0305228:c.[43+15770G>A]
2L mapping	507163	SNV	1	C	T	37	100	34.8919	Gene: FBgn0003963, Misc. feature: contig 2L_1_11 1..50000(1)	FBpp0305228:c.[43+15805C>T]; FBpp0301730:c.[43+15805C>T]
2L mapping	507284	SNV	1	T	C	27	100	33.7407	Gene: FBgn0003963, Misc. feature: contig 2L_1_11 1..50000(1)	FBpp0301730:c.[43+15926T>C]; FBpp0305228:c.[43+15926T>C]
2L mapping	507635	SNV	1	A	C	48	100	35	Gene: FBgn0003963, Misc. feature: contig 2L_1_11 1..50000(1)	FBpp0305228:c.[43+16277A>C]; FBpp0301730:c.[43+16277A>C]
2L mapping	507671	SNV	1	C	T	55	98.1818	32.6667	Gene: FBgn0003963, Misc. feature: contig 2L_1_11 1..50000(1)	FBpp0305228:c.[43+16313C>T]; FBpp0301730:c.[43+16313C>T]
2L mapping	507708	SNV	1	C	T	42	97.619	34.8049	Gene: FBgn0003963, Misc. feature: contig 2L_1_11 1..50000(1)	FBpp0305228:c.[43+16350C>T]; FBpp0301730:c.[43+16350C>T]
2L mapping	507863	Deletion	11	TCGCTTCACCG	-	30	46.6667	31.6429	Gene: FBgn0003963, Misc. feature: contig 2L_1_11 1..50000(1)	FBpp0301730:c.[43+16505_43+16515delTCGCTTCACCG]; FBpp0305228:c.[43+16505_43+16515delTCGCTTCACCG]
2L mapping	508156	Deletion	1	T	-	28	82.1429	36.0435	Gene: FBgn0003963, Misc. feature: contig 2L_1_11 1..50000(1)	FBpp0305228:c.[43+16798delT]; FBpp0301730:c.[43+16798delT]
2L mapping	508210	SNV	1	A	G	28	100	33.6071	Gene: FBgn0003963, Misc. feature: contig 2L_1_11 1..50000(1)	FBpp0301730:c.[43+16852A>G]; FBpp0305228:c.[43+16852A>G]
2L mapping	508428	SNV	1	T	C	37	100	31.6757	Gene: FBgn0003963, Misc. feature: contig 2L_1_11 1..50000(1)	FBpp0305228:c.[44-16964T>C]; FBpp0301730:c.[44-16964T>C]
2L mapping	508695	SNV	1	T	C	42	97.619	33.7073	Gene: FBgn0003963, Misc. feature: contig 2L_1_11 1..50000(1)	FBpp0301730:c.[44-16697T>C]; FBpp0305228:c.[44-16697T>C]
2L mapping	508740	SNV	1	A	C	42	100	34.5	Gene: FBgn0003963, Misc. feature: contig 2L_1_11 1..50000(1)	FBpp0301730:c.[44-16652A>C]; FBpp0305228:c.[44-16652A>C]
2L mapping	508776	SNV	1	A	T	45	95.5556	34.7907	Gene: FBgn0003963, Misc. feature: contig 2L_1_11 1..50000(1)	FBpp0301730:c.[44-16616A>T]; FBpp0305228:c.[44-16616A>T]
2L mapping	508815	SNV	1	A	G	47	97.8723	33.2826	Gene: FBgn0003963, Misc. feature: contig 2L_1_11 1..50000(1)	FBpp0305228:c.[44-16577A>G]; FBpp0301730:c.[44-16577A>G]
2L mapping	509232	SNV	1	A	G	42	100	34.2857	Gene: FBgn0003963, Misc. feature: contig 2L_1_11 1..50000(1)	FBpp0305228:c.[44-16160A>G]; FBpp0301730:c.[44-16160A>G]
2L mapping	509897	SNV	1	T	A	43	100	35.3023	Gene: FBgn0003963, Misc. feature: contig 2L_1_11 1..50000(1)	FBpp0301730:c.[44-15495T>A]; FBpp0305228:c.[44-15495T>A]
2L mapping	510024	SNV	1	T	G	48	100	34.1042	Gene: FBgn0003963, Misc. feature: contig 2L_1_11 1..50000(1)	FBpp0301730:c.[44-15368T>G]; FBpp0305228:c.[44-15368T>G]
2L mapping	510226	SNV	1	G	T	37	100	36.0541	Gene: FBgn0003963, Misc. feature: contig 2L_1_11 1..50000(1)	FBpp0301730:c.[44-15166G>T]; FBpp0305228:c.[44-15166G>T]
2L mapping	510230	SNV	1	G	A	36	100	35.6389	Gene: FBgn0003963, Misc. feature: contig 2L_1_11 1..50000(1)	FBpp0301730:c.[44-15162G>A]; FBpp0305228:c.[44-15162G>A]
2L mapping	510269	Deletion	5	GTTGC	-	31	96.7742	35.1	Gene: FBgn0003963, Misc. feature: contig 2L_1_11 1..50000(1)	FBpp0301730:c.[44-15123_44-15119delGTTGC]; FBpp0305228:c.[44-15123_44-15119delGTTGC]
2L mapping	510458	SNV	1	G	C	47	100	34.2128	Gene: FBgn0003963, Misc. feature: contig 2L_1_11 1..50000(1)	FBpp0305228:c.[44-14934G>C]; FBpp0301730:c.[44-14934G>C]
2L mapping	510632	SNV	1	T	G	43	100	32.3256	Gene: FBgn0003963, Misc. feature: contig 2L_1_11 1..50000(1)	FBpp0301730:c.[44-14760T>G]; FBpp0305228:c.[44-14760T>G]
2L mapping	510752	SNV	1	G	C	52	100	31.8077	Gene: FBgn0003963, Misc. feature: contig 2L_1_11 1..50000(1)	FBpp0301730:c.[44-14640G>C]; FBpp0305228:c.[44-14640G>C]
2L mapping	510802	SNV	1	T	G	52	100	34.8077	Gene: FBgn0003963, Misc. feature: contig 2L_1_11 1..50000(1)	FBpp0305228:c.[44-14590T>G]; FBpp0301730:c.[44-14590T>G]
2L mapping	510853	Deletion	1	T	-	40	85	33.7941	Gene: FBgn0003963, Misc. feature: contig 2L_1_11 1..50000(1)	FBpp0301730:c.[44-14539delT]; FBpp0305228:c.[44-14539delT]
2L mapping	510984	Insertion	1	-	G	34	91.1765	35.6774	Gene: FBgn0003963, Misc. feature: contig 2L_1_11 1..50000(1)	FBpp0301730:c.[44-14409_44-14408insG]; FBpp0305228:c.[44-14409_44-14408insG]
2L mapping	511052	SNV	1	G	C	64	100	34.5	Gene: FBgn0003963, Misc. feature: contig 2L_1_11 1..50000(1)	FBpp0301730:c.[44-14340G>C]; FBpp0305228:c.[44-14340G>C]
2L mapping	511102	SNV	1	A	T	44	100	34.8182	Gene: FBgn0003963, Misc. feature: contig 2L_1_11 1..50000(1)	FBpp0305228:c.[44-14290A>T]; FBpp0301730:c.[44-14290A>T]
2L mapping	511148	SNV	1	T	C	34	100	35.0294	Gene: FBgn0003963, Misc. feature: contig 2L_1_11 1..50000(1)	FBpp0301730:c.[44-14244T>C]; FBpp0305228:c.[44-14244T>C]
2L mapping	511349	SNV	1	A	G	57	100	33.7719	Gene: FBgn0003963, Misc. feature: contig 2L_1_11 1..50000(1)	FBpp0305228:c.[44-14043A>G]; FBpp0301730:c.[44-14043A>G]
2L mapping	511354	SNV	1	T	G	56	100	34.5179	Gene: FBgn0003963, Misc. feature: contig 2L_1_11 1..50000(1)	FBpp0301730:c.[44-14038T>G]; FBpp0305228:c.[44-14038T>G]
2L mapping	511374	SNV	1	G	A	53	100	34.9057	Gene: FBgn0003963, Misc. feature: contig 2L_1_11 1..50000(1)	FBpp0305228:c.[44-14018G>A]; FBpp0301730:c.[44-14018G>A]
2L mapping	511519	SNV	1	G	A	31	100	33.7419	Gene: FBgn0003963, Misc. feature: contig 2L_1_11 1..50000(1)	FBpp0301730:c.[44-13873G>A]; FBpp0305228:c.[44-13873G>A]
2L mapping	511645	SNV	1	T	C	40	100	34.375	Gene: FBgn0003963, Misc. feature: contig 2L_1_11 1..50000(1)	FBpp0301730:c.[44-13747T>C]; FBpp0305228:c.[44-13747T>C]
2L mapping	512209	SNV	1	T	C	41	100	35.3415	Gene: FBgn0003963, Misc. feature: contig 2L_1_11 1..50000(1)	FBpp0301730:c.[44-13183T>C]; FBpp0305228:c.[44-13183T>C]
2L mapping	512240	Deletion	1	G	-	46	100	34.8261	Gene: FBgn0003963, Misc. feature: contig 2L_1_11 1..50000(1)	FBpp0301730:c.[44-13152delG]; FBpp0305228:c.[44-13152delG]
2L mapping	512380	SNV	1	T	A	53	100	35.3019	Gene: FBgn0003963, Misc. feature: contig 2L_1_11 1..50000(1)	FBpp0305228:c.[44-13012T>A]; FBpp0301730:c.[44-13012T>A]
2L mapping	512391	SNV	1	A	G	47	100	35.9787	Gene: FBgn0003963, Misc. feature: contig 2L_1_11 1..50000(1)	FBpp0305228:c.[44-13001A>G]; FBpp0301730:c.[44-13001A>G]
2L mapping	512429	Deletion	1	T	-	45	88.8889	35.675	Gene: FBgn0003963, Misc. feature: contig 2L_1_11 1..50000(1)	FBpp0301730:c.[44-12963delT]; FBpp0305228:c.[44-12963delT]
2L mapping	512438	SNV	1	C	T	48	100	35.5417	Gene: FBgn0003963, Misc. feature: contig 2L_1_11 1..50000(1)	FBpp0305228:c.[44-12954C>T]; FBpp0301730:c.[44-12954C>T]
2L mapping	512473	SNV	1	A	C	48	100	34.3958	Gene: FBgn0003963, Misc. feature: contig 2L_1_11 1..50000(1)	FBpp0305228:c.[44-12919A>C]; FBpp0301730:c.[44-12919A>C]
2L mapping	512613	Insertion	1	-	T	35	62.8571	36	Gene: FBgn0003963, Misc. feature: contig 2L_1_11 1..50000(1)	FBpp0305228:c.[44-12780_44-12779insT]; FBpp0301730:c.[44-12780_44-12779insT]
2L mapping	513099	SNV	1	A	G	47	100	35.2979	Gene: FBgn0003963, Misc. feature: contig 2L_1_11 1..50000(1)	FBpp0305228:c.[44-12293A>G]; FBpp0301730:c.[44-12293A>G]
2L mapping	513405	SNV	1	G	A	40	100	33.325	Gene: FBgn0003963, Misc. feature: contig 2L_1_11 1..50000(1)	FBpp0301730:c.[44-11987G>A]; FBpp0305228:c.[44-11987G>A]
2L mapping	513424	SNV	1	A	T	39	100	35	Gene: FBgn0003963, Misc. feature: contig 2L_1_11 1..50000(1)	FBpp0305228:c.[44-11968A>T]; FBpp0301730:c.[44-11968A>T]
2L mapping	513636	SNV	1	A	T	42	100	34.3095	Gene: FBgn0003963, Misc. feature: contig 2L_1_11 1..50000(1)	FBpp0301730:c.[44-11756A>T]; FBpp0305228:c.[44-11756A>T]
2L mapping	513765	SNV	1	A	G	47	97.8723	34.8696	Gene: FBgn0003963, Misc. feature: contig 2L_1_11 1..50000(1)	FBpp0305228:c.[44-11627A>G]; FBpp0301730:c.[44-11627A>G]
2L mapping	513965	Insertion	1	-	A	38	94.7368	34.9722	Gene: FBgn0003963, Misc. feature: contig 2L_1_11 1..50000(1)	FBpp0305228:c.[44-11428_44-11427insA]; FBpp0301730:c.[44-11428_44-11427insA]
2L mapping	514292	SNV	1	T	C	43	100	36.1628	Gene: FBgn0003963, Misc. feature: contig 2L_1_11 1..50000(1)	FBpp0301730:c.[44-11100T>C]; FBpp0305228:c.[44-11100T>C]
2L mapping	514422	SNV	1	A	G	36	100	34.9167	Gene: FBgn0003963, Misc. feature: contig 2L_1_11 1..50000(1)	FBpp0301730:c.[44-10970A>G]; FBpp0305228:c.[44-10970A>G]
2L mapping	514556	SNV	1	G	T	28	100	33.8929	Gene: FBgn0003963, Misc. feature: contig 2L_1_11 1..50000(1)	FBpp0301730:c.[44-10836G>T]; FBpp0305228:c.[44-10836G>T]
2L mapping	514570	SNV	1	G	C	25	96	34.6667	Gene: FBgn0003963, Misc. feature: contig 2L_1_11 1..50000(1)	FBpp0305228:c.[44-10822G>C]; FBpp0301730:c.[44-10822G>C]
2L mapping	514715	SNV	1	T	C	33	96.9697	34.2188	Gene: FBgn0003963, Misc. feature: contig 2L_1_11 1..50000(1)	FBpp0305228:c.[44-10677T>C]; FBpp0301730:c.[44-10677T>C]
2L mapping	514802	SNV	1	C	A	32	100	35.5312	Gene: FBgn0003963, Misc. feature: contig 2L_1_11 1..50000(1)	FBpp0301730:c.[44-10590C>A]; FBpp0305228:c.[44-10590C>A]
2L mapping	514810	Deletion	1	A	-	34	82.3529	33.0714	Gene: FBgn0003963, Misc. feature: contig 2L_1_11 1..50000(1)	FBpp0305228:c.[44-10582delA]; FBpp0301730:c.[44-10582delA]
2L mapping	514818	SNV	1	A	C	32	100	33.3125	Gene: FBgn0003963, Misc. feature: contig 2L_1_11 1..50000(1)	FBpp0305228:c.[44-10574A>C]; FBpp0301730:c.[44-10574A>C]
2L mapping	514823	SNV	1	G	A	34	100	35.6765	Gene: FBgn0003963, Misc. feature: contig 2L_1_11 1..50000(1)	FBpp0305228:c.[44-10569G>A]; FBpp0301730:c.[44-10569G>A]
2L mapping	514900	SNV	1	T	G	29	100	33.0345	Gene: FBgn0003963, Misc. feature: contig 2L_1_11 1..50000(1)	FBpp0301730:c.[44-10492T>G]; FBpp0305228:c.[44-10492T>G]
2L mapping	515035	SNV	1	C	T	31	100	32.2258	Gene: FBgn0003963, Misc. feature: contig 2L_1_11 1..50000(1)	FBpp0305228:c.[44-10357C>T]; FBpp0301730:c.[44-10357C>T]
2L mapping	515063	SNV	1	A	T	32	96.875	34.4194	Gene: FBgn0003963, Misc. feature: contig 2L_1_11 1..50000(1)	FBpp0305228:c.[44-10329A>T]; FBpp0301730:c.[44-10329A>T]
2L mapping	515071	SNV	1	T	A	32	100	34.75	Gene: FBgn0003963, Misc. feature: contig 2L_1_11 1..50000(1)	FBpp0301730:c.[44-10321T>A]; FBpp0305228:c.[44-10321T>A]
2L mapping	515128	SNV	1	A	G	31	96.7742	33.3	Gene: FBgn0003963, Misc. feature: contig 2L_1_11 1..50000(1)	FBpp0305228:c.[44-10264A>G]; FBpp0301730:c.[44-10264A>G]
2L mapping	515142	SNV	1	G	A	34	100	33.4706	Gene: FBgn0003963, Misc. feature: contig 2L_1_11 1..50000(1)	FBpp0301730:c.[44-10250G>A]; FBpp0305228:c.[44-10250G>A]
2L mapping	515314	SNV	1	C	T	28	100	34.0714	Gene: FBgn0003963, Misc. feature: contig 2L_1_11 1..50000(1)	FBpp0301730:c.[44-10078C>T]; FBpp0305228:c.[44-10078C>T]
2L mapping	515471	SNV	1	G	A	28	96.4286	35.1111	Gene: FBgn0003963, Misc. feature: contig 2L_1_11 1..50000(1)	FBpp0305228:c.[44-9921G>A]; FBpp0301730:c.[44-9921G>A]
2L mapping	515640	Insertion	1	-	G	12	83.3333	35.1	Gene: FBgn0003963, Misc. feature: contig 2L_1_11 1..50000(1)	FBpp0305228:c.[44-9753_44-9752insG]; FBpp0301730:c.[44-9753_44-9752insG]
2L mapping	515646	SNV	1	G	A	25	64	28.3125	Gene: FBgn0003963, Misc. feature: contig 2L_1_11 1..50000(1)	FBpp0305228:c.[44-9746G>A]; FBpp0301730:c.[44-9746G>A]
2L mapping	516087	SNV	1	C	T	33	100	32.4242	Gene: FBgn0003963, Misc. feature: contig 2L_1_11 1..50000(1)	FBpp0305228:c.[44-9305C>T]; FBpp0301730:c.[44-9305C>T]
2L mapping	517361	SNV	1	C	A	41	100	34.3415	Gene: FBgn0003963, Misc. feature: contig 2L_1_11 1..50000(1)	FBpp0305228:c.[44-8031C>A]; FBpp0301730:c.[44-8031C>A]
2L mapping	517873	SNV	1	T	C	36	100	35.8611	Gene: FBgn0003963, Misc. feature: contig 2L_1_11 1..50000(1)	FBpp0301730:c.[44-7519T>C]; FBpp0305228:c.[44-7519T>C]
2L mapping	518419	SNV	1	A	G	30	96.6667	35.4138	Gene: FBgn0003963, Misc. feature: contig 2L_1_11 1..50000(1)	FBpp0301730:c.[44-6973A>G]; FBpp0305228:c.[44-6973A>G]
2L mapping	518577	MNV	2	GA	AC	30	96.6667	34.8621	Gene: FBgn0003963, Misc. feature: contig 2L_1_11 1..50000(1)	FBpp0305228:c.[44-6815_44-6814delGAinsAC]; FBpp0301730:c.[44-6815_44-6814delGAinsAC]
2L mapping	518748	SNV	1	T	C	44	100	35.3182	Gene: FBgn0003963, Misc. feature: contig 2L_1_11 1..50000(1)	FBpp0301730:c.[44-6644T>C]; FBpp0305228:c.[44-6644T>C]
2L mapping	518814	SNV	1	C	A	37	100	35.0811	Gene: FBgn0003963, Misc. feature: contig 2L_1_11 1..50000(1)	FBpp0301730:c.[44-6578C>A]; FBpp0305228:c.[44-6578C>A]
2L mapping	518826	SNV	1	T	G	40	97.5	35.7949	Gene: FBgn0003963, Misc. feature: contig 2L_1_11 1..50000(1)	FBpp0301730:c.[44-6566T>G]; FBpp0305228:c.[44-6566T>G]
2L mapping	518977	SNV	1	A	G	34	97.0588	34.6364	Gene: FBgn0003963, Misc. feature: contig 2L_1_11 1..50000(1)	FBpp0305228:c.[44-6415A>G]; FBpp0301730:c.[44-6415A>G]
2L mapping	519045	SNV	1	C	A	36	100	33.8333	Gene: FBgn0003963, Misc. feature: contig 2L_1_11 1..50000(1)	FBpp0301730:c.[44-6347C>A]; FBpp0305228:c.[44-6347C>A]
2L mapping	519176	SNV	1	A	G	41	100	35.3659	Gene: FBgn0003963, Misc. feature: contig 2L_1_11 1..50000(1)	FBpp0301730:c.[44-6216A>G]; FBpp0305228:c.[44-6216A>G]
2L mapping	519871	SNV	1	C	G	45	97.7778	36.5909	Gene: FBgn0003963, Misc. feature: contig 2L_1_11 1..50000(1)	FBpp0305228:c.[44-5521C>G]; FBpp0301730:c.[44-5521C>G]
2L mapping	519996	SNV	1	G	C	51	100	33.4314	Gene: FBgn0003963, Misc. feature: contig 2L_1_11 1..50000(1)	FBpp0301730:c.[44-5396G>C]; FBpp0305228:c.[44-5396G>C]
2L mapping	520184	SNV	1	G	A	50	100	36.12	Gene: FBgn0003963, Misc. feature: contig 2L_1_11 1..50000(1)	FBpp0305228:c.[44-5208G>A]; FBpp0301730:c.[44-5208G>A]
2L mapping	520190	SNV	1	G	A	53	100	33.6415	Gene: FBgn0003963, Misc. feature: contig 2L_1_11 1..50000(1)	FBpp0301730:c.[44-5202G>A]; FBpp0305228:c.[44-5202G>A]
2L mapping	520339	SNV	1	G	C	59	100	34.9831	Gene: FBgn0003963, Misc. feature: contig 2L_1_11 1..50000(1)	FBpp0305228:c.[44-5053G>C]; FBpp0301730:c.[44-5053G>C]
2L mapping	520383	Insertion	1	-	G	55	96.3636	33.6604	Gene: FBgn0003963, Misc. feature: contig 2L_1_11 1..50000(1)	FBpp0301730:c.[44-5010_44-5009insG]; FBpp0305228:c.[44-5010_44-5009insG]
2L mapping	520562	SNV	1	G	C	32	100	36.25	Gene: FBgn0003963, Misc. feature: contig 2L_1_11 1..50000(1)	FBpp0301730:c.[44-4830G>C]; FBpp0305228:c.[44-4830G>C]
2L mapping	520585	SNV	1	A	G	41	100	35.5854	Gene: FBgn0003963, Misc. feature: contig 2L_1_11 1..50000(1)	FBpp0305228:c.[44-4807A>G]; FBpp0301730:c.[44-4807A>G]
2L mapping	520743	SNV	1	C	T	41	97.561	35.575	Gene: FBgn0003963, Misc. feature: contig 2L_1_11 1..50000(1)	FBpp0305228:c.[44-4649C>T]; FBpp0301730:c.[44-4649C>T]
2L mapping	520752	SNV	1	T	A	45	100	34.6444	Gene: FBgn0003963, Misc. feature: contig 2L_1_11 1..50000(1)	FBpp0305228:c.[44-4640T>A]; FBpp0301730:c.[44-4640T>A]
2L mapping	520769	SNV	1	A	T	40	97.5	36.0513	Gene: FBgn0003963, Misc. feature: contig 2L_1_11 1..50000(1)	FBpp0301730:c.[44-4623A>T]; FBpp0305228:c.[44-4623A>T]
2L mapping	520773	SNV	1	C	T	41	100	34.5366	Gene: FBgn0003963, Misc. feature: contig 2L_1_11 1..50000(1)	FBpp0301730:c.[44-4619C>T]; FBpp0305228:c.[44-4619C>T]
2L mapping	520783	SNV	1	A	T	43	100	36.3023	Gene: FBgn0003963, Misc. feature: contig 2L_1_11 1..50000(1)	FBpp0305228:c.[44-4609A>T]; FBpp0301730:c.[44-4609A>T]
2L mapping	520785	SNV	1	T	G	43	100	35.9535	Gene: FBgn0003963, Misc. feature: contig 2L_1_11 1..50000(1)	FBpp0301730:c.[44-4607T>G]; FBpp0305228:c.[44-4607T>G]
2L mapping	520791	SNV	1	T	C	42	100	34.2857	Gene: FBgn0003963, Misc. feature: contig 2L_1_11 1..50000(1)	FBpp0305228:c.[44-4601T>C]; FBpp0301730:c.[44-4601T>C]
2L mapping	520816	MNV	2	CG	AA	36	100	36.0417	Gene: FBgn0003963, Misc. feature: contig 2L_1_11 1..50000(1)	FBpp0301730:c.[44-4576_44-4575delCGinsAA]; FBpp0305228:c.[44-4576_44-4575delCGinsAA]
2L mapping	520829	Deletion	5	TTCAG	-	32	68.75	34.5455	Gene: FBgn0003963, Misc. feature: contig 2L_1_11 1..50000(1)	FBpp0305228:c.[44-4563_44-4559delTTCAG]; FBpp0301730:c.[44-4563_44-4559delTTCAG]
2L mapping	521048	SNV	1	A	T	49	100	34.2653	Gene: FBgn0003963, Misc. feature: contig 2L_1_11 1..50000(1)	FBpp0305228:c.[44-4344A>T]; FBpp0301730:c.[44-4344A>T]
2L mapping	521050	SNV	1	A	C	49	100	33.4082	Gene: FBgn0003963, Misc. feature: contig 2L_1_11 1..50000(1)	FBpp0305228:c.[44-4342A>C]; FBpp0301730:c.[44-4342A>C]
2L mapping	521108	SNV	1	T	C	54	100	35.0556	Gene: FBgn0003963, Misc. feature: contig 2L_1_11 1..50000(1)	FBpp0301730:c.[44-4284T>C]; FBpp0305228:c.[44-4284T>C]
2L mapping	521120	SNV	1	G	C	52	98.0769	34.6471	Gene: FBgn0003963, Misc. feature: contig 2L_1_11 1..50000(1)	FBpp0305228:c.[44-4272G>C]; FBpp0301730:c.[44-4272G>C]
2L mapping	521283	SNV	1	A	C	40	100	35.3	Gene: FBgn0003963, Misc. feature: contig 2L_1_11 1..50000(1)	FBpp0301730:c.[44-4109A>C]; FBpp0305228:c.[44-4109A>C]
2L mapping	521290	Insertion	1	-	T	41	92.6829	34.0263	Gene: FBgn0003963, Misc. feature: contig 2L_1_11 1..50000(1)	FBpp0305228:c.[44-4103_44-4102insT]; FBpp0301730:c.[44-4103_44-4102insT]
2L mapping	521305	Deletion	2	GT	-	41	78.0488	32.0938	Gene: FBgn0003963, Misc. feature: contig 2L_1_11 1..50000(1)	FBpp0301730:c.[44-4087_44-4086delGT]; FBpp0305228:c.[44-4087_44-4086delGT]
2L mapping	521309	SNV	1	G	A	41	80.4878	30.4545	Gene: FBgn0003963, Misc. feature: contig 2L_1_11 1..50000(1)	FBpp0305228:c.[44-4083G>A]; FBpp0301730:c.[44-4083G>A]
2L mapping	521348	Insertion	4	-	AGGA	33	72.7273	33.4167	Gene: FBgn0003963, Misc. feature: contig 2L_1_11 1..50000(1)	FBpp0305228:c.[44-4045_44-4044insAGGA]; FBpp0301730:c.[44-4045_44-4044insAGGA]
2L mapping	521426	SNV	1	G	A	36	97.2222	31.6286	Gene: FBgn0003963, Misc. feature: contig 2L_1_11 1..50000(1)	FBpp0305228:c.[44-3966G>A]; FBpp0301730:c.[44-3966G>A]
2L mapping	521444	SNV	1	T	C	37	100	35.027	Gene: FBgn0003963, Misc. feature: contig 2L_1_11 1..50000(1)	FBpp0301730:c.[44-3948T>C]; FBpp0305228:c.[44-3948T>C]
2L mapping	521454	SNV	1	A	C	38	100	33.3421	Gene: FBgn0003963, Misc. feature: contig 2L_1_11 1..50000(1)	FBpp0305228:c.[44-3938A>C]; FBpp0301730:c.[44-3938A>C]
2L mapping	521550	SNV	1	G	A	24	100	35.875	Gene: FBgn0003963, Misc. feature: contig 2L_1_11 1..50000(1)	FBpp0305228:c.[44-3842G>A]; FBpp0301730:c.[44-3842G>A]
2L mapping	521781	SNV	1	G	T	27	100	31.3704	Gene: FBgn0003963, Misc. feature: contig 2L_1_11 1..50000(1)	FBpp0305228:c.[44-3611G>T]; FBpp0301730:c.[44-3611G>T]
2L mapping	521790	SNV	1	C	T	24	95.8333	28.3043	Gene: FBgn0003963, Misc. feature: contig 2L_1_11 1..50000(1)	FBpp0301730:c.[44-3602C>T]; FBpp0305228:c.[44-3602C>T]
2L mapping	521815	SNV	1	A	T	24	41.6667	29	Gene: FBgn0003963, Misc. feature: contig 2L_1_11 1..50000(1)	FBpp0301730:c.[44-3577A>T]; FBpp0305228:c.[44-3577A>T]
2L mapping	521929	Insertion	1	-	A	21	57.1429	36.6667	Gene: FBgn0003963, Misc. feature: contig 2L_1_11 1..50000(1)	FBpp0305228:c.[44-3464_44-3463insA]; FBpp0301730:c.[44-3464_44-3463insA]
2L mapping	522059	SNV	1	T	A	39	100	35.1282	Gene: FBgn0003963, Misc. feature: contig 2L_1_11 1..50000(1)	FBpp0301730:c.[44-3333T>A]; FBpp0305228:c.[44-3333T>A]
2L mapping	522179	SNV	1	A	G	35	100	34.4	Gene: FBgn0003963, Misc. feature: contig 2L_1_11 1..50000(1)	FBpp0301730:c.[44-3213A>G]; FBpp0305228:c.[44-3213A>G]
2L mapping	522347	SNV	1	T	G	33	100	34.7576	Gene: FBgn0003963, Misc. feature: contig 2L_1_11 1..50000(1)	FBpp0301730:c.[44-3045T>G]; FBpp0305228:c.[44-3045T>G]
2L mapping	522517	SNV	1	A	C	21	57.1429	32	Gene: FBgn0003963, Misc. feature: contig 2L_1_11 1..50000(1)	FBpp0301730:c.[44-2875A>C]; FBpp0305228:c.[44-2875A>C]
2L mapping	522519	SNV	1	A	T	21	61.9048	32.3846	Gene: FBgn0003963, Misc. feature: contig 2L_1_11 1..50000(1)	FBpp0301730:c.[44-2873A>T]; FBpp0305228:c.[44-2873A>T]
2L mapping	522802	SNV	1	C	T	29	100	34.3103	Gene: FBgn0003963, Misc. feature: contig 2L_1_11 1..50000(1)	FBpp0305228:c.[44-2590C>T]; FBpp0301730:c.[44-2590C>T]
2L mapping	522816	SNV	1	A	T	27	100	31.7407	Gene: FBgn0003963, Misc. feature: contig 2L_1_11 1..50000(1)	FBpp0301730:c.[44-2576A>T]; FBpp0305228:c.[44-2576A>T]
2L mapping	522848	SNV	1	G	A	20	100	36	Gene: FBgn0003963, Misc. feature: contig 2L_1_11 1..50000(1)	FBpp0301730:c.[44-2544G>A]; FBpp0305228:c.[44-2544G>A]
2L mapping	522863	Deletion	2	CA	-	25	36	28.6667	Gene: FBgn0003963, Misc. feature: contig 2L_1_11 1..50000(1)	FBpp0301730:c.[44-2529_44-2528delCA]; FBpp0305228:c.[44-2529_44-2528delCA]
2L mapping	522865	Deletion	1	C	-	25	36	34.7778	Gene: FBgn0003963, Misc. feature: contig 2L_1_11 1..50000(1)	FBpp0305228:c.[44-2527delC]; FBpp0301730:c.[44-2527delC]
2L mapping	522901	SNV	1	T	C	27	100	31.4815	Gene: FBgn0003963, Misc. feature: contig 2L_1_11 1..50000(1)	FBpp0301730:c.[44-2491T>C]; FBpp0305228:c.[44-2491T>C]
2L mapping	523223	SNV	1	A	G	35	100	34.6857	Gene: FBgn0003963, Misc. feature: contig 2L_1_11 1..50000(1)	FBpp0305228:c.[44-2169A>G]; FBpp0301730:c.[44-2169A>G]
2L mapping	523536	SNV	1	C	T	30	100	32.6667	Exon: Exon, Gene: FBgn0003963, Misc. feature: contig 2L_1_11 1..50000(1), mRNA: FBgn0003963	FBpp0301730:c.[44-1856C>T]; FBpp0305228:c.[44-1856C>T]
2L mapping	523758	SNV	1	G	A	40	100	35.575	Exon: Exon, Exon: Exon, Gene: FBgn0003963, Misc. feature: contig 2L_1_11 1..50000(1), mRNA: FBgn0003963, mRNA: FBgn0003963	FBpp0305228:c.[44-1634G>A]; FBpp0301730:c.[44-1634G>A]
2L mapping	523803	SNV	1	C	T	33	100	34.3636	Exon: Exon, Exon: Exon, Gene: FBgn0003963, Misc. feature: contig 2L_1_11 1..50000(1), mRNA: FBgn0003963, mRNA: FBgn0003963	FBpp0301730:c.[44-1589C>T]; FBpp0305228:c.[44-1589C>T]
2L mapping	523903	SNV	1	G	A	45	100	35.5556	Exon: Exon, Exon: Exon, Gene: FBgn0003963, Misc. feature: contig 2L_1_11 1..50000(1), mRNA: FBgn0003963, mRNA: FBgn0003963	FBpp0301730:c.[44-1489G>A]; FBpp0305228:c.[44-1489G>A]
2L mapping	524271	SNV	1	A	T	49	100	35.3878	Gene: FBgn0003963, Misc. feature: contig 2L_1_11 1..50000(1)	FBpp0077723:c.[22+212A>T]; FBpp0302929:c.[22+212A>T]; FBpp0301730:c.[44-1121A>T]; FBpp0305228:c.[44-1121A>T]
2L mapping	524541	SNV	1	A	G	37	100	33.9189	Gene: FBgn0003963, Misc. feature: contig 2L_1_11 1..50000(1)	FBpp0077723:c.[22+482A>G]; FBpp0302929:c.[22+482A>G]; FBpp0301730:c.[44-851A>G]; FBpp0305228:c.[44-851A>G]
2L mapping	524556	SNV	1	T	G	38	100	34.2105	Gene: FBgn0003963, Misc. feature: contig 2L_1_11 1..50000(1)	FBpp0301730:c.[44-836T>G]; FBpp0302929:c.[22+497T>G]; FBpp0077723:c.[22+497T>G]; FBpp0305228:c.[44-836T>G]
2L mapping	524792	SNV	1	C	G	33	96.9697	35.9062	Gene: FBgn0003963, Misc. feature: contig 2L_1_11 1..50000(1)	FBpp0302929:c.[23-600C>G]; FBpp0077723:c.[23-600C>G]; FBpp0301730:c.[44-600C>G]; FBpp0305228:c.[44-600C>G]
2L mapping	524795	SNV	1	T	C	31	100	33.3871	Gene: FBgn0003963, Misc. feature: contig 2L_1_11 1..50000(1)	FBpp0302929:c.[23-597T>C]; FBpp0301730:c.[44-597T>C]; FBpp0305228:c.[44-597T>C]; FBpp0077723:c.[23-597T>C]
2L mapping	524954	Insertion	4	-	GGGG	40	77.5	33.75	Gene: FBgn0003963, Misc. feature: contig 2L_1_11 1..50000(1)	FBpp0301730:c.[44-439_44-438insGGGG]; FBpp0077723:c.[23-439_23-438insGGGG]; FBpp0302929:c.[23-439_23-438insGGGG]; FBpp0305228:c.[44-439_44-438insGGGG]
2L mapping	525267	SNV	1	A	G	43	100	35.7674	Gene: FBgn0003963, Misc. feature: contig 2L_1_11 1..50000(1)	FBpp0301730:c.[44-125A>G]; FBpp0302929:c.[23-125A>G]; FBpp0077723:c.[23-125A>G]; FBpp0305228:c.[44-125A>G]
2L mapping	525321	SNV	1	C	G	63	100	34.8413	Gene: FBgn0003963, Misc. feature: contig 2L_1_11 1..50000(1)	FBpp0301730:c.[44-71C>G]; FBpp0305228:c.[44-71C>G]; FBpp0302929:c.[23-71C>G]; FBpp0077723:c.[23-71C>G]
2L mapping	525337	SNV	1	A	C	62	100	35.871	Gene: FBgn0003963, Misc. feature: contig 2L_1_11 1..50000(1)	FBpp0302929:c.[23-55A>C]; FBpp0077723:c.[23-55A>C]; FBpp0301730:c.[44-55A>C]; FBpp0305228:c.[44-55A>C]
2L mapping	525446	SNV	1	T	C	48	100	35.0417	Gene: FBgn0003963, Misc. feature: contig 2L_1_11 1..50000(1)	FBpp0305227:c.[19+10T>C]; FBpp0301730:c.[88+10T>C]; FBpp0302929:c.[67+10T>C]; FBpp0305228:c.[88+10T>C]; FBpp0077723:c.[67+10T>C]
2L mapping	525531	SNV	1	C	T	55	100	34.9273	Gene: FBgn0003963, Misc. feature: contig 2L_1_11 1..50000(1)	FBpp0301730:c.[88+95C>T]; FBpp0305227:c.[19+95C>T]; FBpp0302929:c.[67+95C>T]; FBpp0077723:c.[67+95C>T]; FBpp0305228:c.[88+95C>T]
2L mapping	525825	Insertion	1	-	T	27	85.1852	33.1739	Gene: FBgn0003963, Misc. feature: contig 2L_1_11 1..50000(1)	FBpp0077723:c.[67+388_67+389insT]; FBpp0305227:c.[19+388_19+389insT]; FBpp0302929:c.[67+388_67+389insT]; FBpp0305228:c.[88+388_88+389insT]; FBpp0301730:c.[88+388_88+389insT]
2L mapping	525924	SNV	1	T	A	11	100	32.4545	Gene: FBgn0003963, Misc. feature: contig 2L_1_11 1..50000(1)	FBpp0302929:c.[67+488T>A]; FBpp0305227:c.[19+488T>A]; FBpp0077723:c.[67+488T>A]; FBpp0301730:c.[88+488T>A]; FBpp0305228:c.[88+488T>A]
2L mapping	526017	SNV	1	G	A	25	100	32.8	Gene: FBgn0003963, Misc. feature: contig 2L_1_11 1..50000(1)	FBpp0305228:c.[88+581G>A]; FBpp0301730:c.[88+581G>A]; FBpp0305227:c.[19+581G>A]; FBpp0077723:c.[67+581G>A]; FBpp0302929:c.[67+581G>A]
2L mapping	526182	SNV	1	C	A	32	100	35.0938	Gene: FBgn0003963, Misc. feature: contig 2L_1_11 1..50000(1)	FBpp0302929:c.[67+746C>A]; FBpp0077723:c.[67+746C>A]; FBpp0305228:c.[88+746C>A]; FBpp0301730:c.[88+746C>A]; FBpp0305227:c.[19+746C>A]
2L mapping	526366	SNV	1	T	C	39	100	34.8718	Gene: FBgn0003963, Misc. feature: contig 2L_1_11 1..50000(1)	FBpp0301730:c.[88+930T>C]; FBpp0302929:c.[67+930T>C]; FBpp0305228:c.[88+930T>C]; FBpp0077723:c.[67+930T>C]; FBpp0305227:c.[19+930T>C]
2L mapping	526431	SNV	1	A	T	44	100	35.5455	Gene: FBgn0003963, Misc. feature: contig 2L_1_11 1..50000(1)	FBpp0077723:c.[67+995A>T]; FBpp0305228:c.[88+995A>T]; FBpp0305227:c.[19+995A>T]; FBpp0302929:c.[67+995A>T]; FBpp0301730:c.[88+995A>T]
2L mapping	526461	SNV	1	T	A	42	100	33.4286	Gene: FBgn0003963, Misc. feature: contig 2L_1_11 1..50000(1)	FBpp0301730:c.[88+1025T>A]; FBpp0302929:c.[67+1025T>A]; FBpp0305227:c.[19+1025T>A]; FBpp0305228:c.[88+1025T>A]; FBpp0077723:c.[67+1025T>A]
2L mapping	526483	SNV	1	C	T	46	95.6522	34.9318	Gene: FBgn0003963, Misc. feature: contig 2L_1_11 1..50000(1)	FBpp0077723:c.[67+1047C>T]; FBpp0305227:c.[19+1047C>T]; FBpp0301730:c.[88+1047C>T]; FBpp0302929:c.[67+1047C>T]; FBpp0305228:c.[88+1047C>T]
2L mapping	526673	SNV	1	C	A	31	41.9355	34.9231	Gene: FBgn0003963, Misc. feature: contig 2L_1_11 1..50000(1)	FBpp0301730:c.[88+1237C>A]; FBpp0077723:c.[67+1237C>A]; FBpp0305227:c.[19+1237C>A]; FBpp0302929:c.[67+1237C>A]; FBpp0305228:c.[88+1237C>A]
2L mapping	526676	SNV	1	T	C	31	38.7097	34.75	Gene: FBgn0003963, Misc. feature: contig 2L_1_11 1..50000(1)	FBpp0305227:c.[19+1240T>C]; FBpp0077723:c.[67+1240T>C]; FBpp0301730:c.[88+1240T>C]; FBpp0302929:c.[67+1240T>C]; FBpp0305228:c.[88+1240T>C]
2L mapping	526756	SNV	1	T	A	29	100	33	Gene: FBgn0003963, Misc. feature: contig 2L_1_11 1..50000(1)	FBpp0077723:c.[67+1320T>A]; FBpp0302929:c.[67+1320T>A]; FBpp0301730:c.[88+1320T>A]; FBpp0305228:c.[88+1320T>A]; FBpp0305227:c.[19+1320T>A]
2L mapping	526758	SNV	1	C	T	29	100	33.0345	Gene: FBgn0003963, Misc. feature: contig 2L_1_11 1..50000(1)	FBpp0305228:c.[88+1322C>T]; FBpp0077723:c.[67+1322C>T]; FBpp0301730:c.[88+1322C>T]; FBpp0302929:c.[67+1322C>T]; FBpp0305227:c.[19+1322C>T]
2L mapping	526805	SNV	1	A	G	35	100	33.7714	Gene: FBgn0003963, Misc. feature: contig 2L_1_11 1..50000(1)	FBpp0077723:c.[67+1369A>G]; FBpp0301730:c.[88+1369A>G]; FBpp0305227:c.[19+1369A>G]; FBpp0305228:c.[88+1369A>G]; FBpp0302929:c.[67+1369A>G]
2L mapping	527029	Deletion	5	CCGCT	-	29	79.3103	32.2174	Gene: FBgn0003963, Misc. feature: contig 2L_1_11 1..50000(1)	FBpp0305228:c.[88+1593_88+1597delCCGCT]; FBpp0077723:c.[67+1593_67+1597delCCGCT]; FBpp0301730:c.[88+1593_88+1597delCCGCT]; FBpp0302929:c.[67+1593_67+1597delCCGCT]; FBpp0305227:c.[19+1593_19+1597delCCGCT]
2L mapping	527101	SNV	1	A	C	42	100	34.4524	Gene: FBgn0003963, Misc. feature: contig 2L_1_11 1..50000(1)	FBpp0302929:c.[67+1665A>C]; FBpp0301730:c.[88+1665A>C]; FBpp0305227:c.[19+1665A>C]; FBpp0305228:c.[88+1665A>C]; FBpp0077723:c.[67+1665A>C]
2L mapping	527111	SNV	1	G	A	43	100	36.186	Gene: FBgn0003963, Misc. feature: contig 2L_1_11 1..50000(1)	FBpp0305228:c.[88+1675G>A]; FBpp0302929:c.[67+1675G>A]; FBpp0077723:c.[67+1675G>A]; FBpp0301730:c.[88+1675G>A]; FBpp0305227:c.[19+1675G>A]
2L mapping	527144	SNV	1	A	T	47	97.8723	35.7609	Gene: FBgn0003963, Misc. feature: contig 2L_1_11 1..50000(1)	FBpp0305227:c.[19+1708A>T]; FBpp0302929:c.[67+1708A>T]; FBpp0305228:c.[88+1708A>T]; FBpp0077723:c.[67+1708A>T]; FBpp0301730:c.[88+1708A>T]
2L mapping	527157	SNV	1	C	T	51	100	35.8431	Gene: FBgn0003963, Misc. feature: contig 2L_1_11 1..50000(1)	FBpp0301730:c.[88+1721C>T]; FBpp0077723:c.[67+1721C>T]; FBpp0302929:c.[67+1721C>T]; FBpp0305227:c.[19+1721C>T]; FBpp0305228:c.[88+1721C>T]
2L mapping	527197	SNV	1	T	A	43	100	35.2558	Gene: FBgn0003963, Misc. feature: contig 2L_1_11 1..50000(1)	FBpp0305227:c.[19+1761T>A]; FBpp0305228:c.[88+1761T>A]; FBpp0302929:c.[67+1761T>A]; FBpp0077723:c.[67+1761T>A]; FBpp0301730:c.[88+1761T>A]
2L mapping	527330	SNV	1	C	A	43	97.6744	34.1429	Gene: FBgn0003963, Misc. feature: contig 2L_1_11 1..50000(1)	FBpp0305227:c.[19+1894C>A]; FBpp0302929:c.[67+1894C>A]; FBpp0077723:c.[67+1894C>A]; FBpp0301730:c.[88+1894C>A]; FBpp0305228:c.[88+1894C>A]
2L mapping	527500	Deletion	4	TGTG	-	34	61.7647	33.1905	Gene: FBgn0003963, Misc. feature: contig 2L_1_11 1..50000(1)	FBpp0305228:c.[88+2064_88+2067delTGTG]; FBpp0305227:c.[19+2064_19+2067delTGTG]; FBpp0302929:c.[67+2064_67+2067delTGTG]; FBpp0077723:c.[67+2064_67+2067delTGTG]; FBpp0301730:c.[88+2064_88+2067delTGTG]
2L mapping	527739	SNV	1	T	C	39	97.4359	33.8684	Gene: FBgn0003963, Misc. feature: contig 2L_1_11 1..50000(1)	FBpp0077723:c.[67+2303T>C]; FBpp0301730:c.[88+2303T>C]; FBpp0302929:c.[67+2303T>C]; FBpp0305228:c.[88+2303T>C]; FBpp0305227:c.[19+2303T>C]
2L mapping	527943	SNV	1	T	A	31	100	36.0323	Gene: FBgn0003963, Misc. feature: contig 2L_1_11 1..50000(1)	FBpp0301730:c.[88+2507T>A]; FBpp0305227:c.[19+2507T>A]; FBpp0302929:c.[67+2507T>A]; FBpp0077723:c.[67+2507T>A]; FBpp0305228:c.[88+2507T>A]
2L mapping	527985	SNV	1	G	C	30	96.6667	33.6552	Gene: FBgn0003963, Misc. feature: contig 2L_1_11 1..50000(1)	FBpp0305227:c.[19+2549G>C]; FBpp0305228:c.[88+2549G>C]; FBpp0301730:c.[88+2549G>C]; FBpp0302929:c.[67+2549G>C]; FBpp0077723:c.[67+2549G>C]
2L mapping	528086	Deletion	1	A	-	24	91.6667	33.0455	Gene: FBgn0003963, Misc. feature: contig 2L_1_11 1..50000(1)	FBpp0302929:c.[67+2650delA]; FBpp0305228:c.[88+2650delA]; FBpp0077723:c.[67+2650delA]; FBpp0301730:c.[88+2650delA]; FBpp0305227:c.[19+2650delA]
2L mapping	528151	SNV	1	C	T	46	100	34.7391	Gene: FBgn0003963, Misc. feature: contig 2L_1_11 1..50000(1)	FBpp0077723:c.[67+2715C>T]; FBpp0305228:c.[88+2715C>T]; FBpp0305227:c.[19+2715C>T]; FBpp0301730:c.[88+2715C>T]; FBpp0302929:c.[67+2715C>T]
2L mapping	528314	Insertion	1	-	T	29	89.6552	35.4231	Gene: FBgn0003963, Misc. feature: contig 2L_1_11 1..50000(1)	FBpp0302929:c.[67+2877_67+2878insT]; FBpp0305227:c.[19+2877_19+2878insT]; FBpp0305228:c.[88+2877_88+2878insT]; FBpp0301730:c.[88+2877_88+2878insT]; FBpp0077723:c.[67+2877_67+2878insT]
2L mapping	528352	SNV	1	T	G	28	100	34.6071	Gene: FBgn0003963, Misc. feature: contig 2L_1_11 1..50000(1)	FBpp0301730:c.[88+2916T>G]; FBpp0077723:c.[67+2916T>G]; FBpp0305228:c.[88+2916T>G]; FBpp0305227:c.[19+2916T>G]; FBpp0302929:c.[67+2916T>G]
2L mapping	528468	MNV	2	GG	CT	47	100	34.4149	Gene: FBgn0003963, Misc. feature: contig 2L_1_11 1..50000(1)	FBpp0077723:c.[67+3032_67+3033delGGinsCT]; FBpp0305227:c.[19+3032_19+3033delGGinsCT]; FBpp0305228:c.[88+3032_88+3033delGGinsCT]; FBpp0302929:c.[67+3032_67+3033delGGinsCT]; FBpp0301730:c.[88+3032_88+3033delGGinsCT]
2L mapping	528489	SNV	1	C	G	45	97.7778	34.75	Gene: FBgn0003963, Misc. feature: contig 2L_1_11 1..50000(1)	FBpp0077723:c.[67+3053C>G]; FBpp0305227:c.[19+3053C>G]; FBpp0305228:c.[88+3053C>G]; FBpp0301730:c.[88+3053C>G]; FBpp0302929:c.[67+3053C>G]
2L mapping	528535	MNV	3	CAA	TGG	31	96.7742	34.3556	Gene: FBgn0003963, Misc. feature: contig 2L_1_11 1..50000(1)	FBpp0302929:c.[67+3099_67+3101delCAAinsTGG]; FBpp0301730:c.[88+3099_88+3101delCAAinsTGG]; FBpp0305227:c.[19+3099_19+3101delCAAinsTGG]; FBpp0305228:c.[88+3099_88+3101delCAAinsTGG]; FBpp0077723:c.[67+3099_67+3101delCAAinsTGG]
2L mapping	528540	Replacement	3	TTT	G	31	96.7742	32.2222	Gene: FBgn0003963, Misc. feature: contig 2L_1_11 1..50000(1)	FBpp0077723:c.[67+3104_67+3106delTTTinsG]; FBpp0301730:c.[88+3104_88+3106delTTTinsG]; FBpp0305227:c.[19+3104_19+3106delTTTinsG]; FBpp0305228:c.[88+3104_88+3106delTTTinsG]; FBpp0302929:c.[67+3104_67+3106delTTTinsG]
2L mapping	528562	SNV	1	C	A	41	100	35.1463	Gene: FBgn0003963, Misc. feature: contig 2L_1_11 1..50000(1)	FBpp0305227:c.[19+3126C>A]; FBpp0077723:c.[67+3126C>A]; FBpp0301730:c.[88+3126C>A]; FBpp0305228:c.[88+3126C>A]; FBpp0302929:c.[67+3126C>A]
2L mapping	528575	SNV	1	A	T	36	100	36.0833	Gene: FBgn0003963, Misc. feature: contig 2L_1_11 1..50000(1)	FBpp0305227:c.[19+3139A>T]; FBpp0301730:c.[88+3139A>T]; FBpp0302929:c.[67+3139A>T]; FBpp0077723:c.[67+3139A>T]; FBpp0305228:c.[88+3139A>T]
2L mapping	528593	SNV	1	C	T	35	100	34.5429	Gene: FBgn0003963, Misc. feature: contig 2L_1_11 1..50000(1)	FBpp0077723:c.[67+3157C>T]; FBpp0305227:c.[19+3157C>T]; FBpp0301730:c.[88+3157C>T]; FBpp0302929:c.[67+3157C>T]; FBpp0305228:c.[88+3157C>T]
2L mapping	528770	SNV	1	T	C	47	100	35.8511	Gene: FBgn0003963, Misc. feature: contig 2L_1_11 1..50000(1)	FBpp0301730:c.[88+3334T>C]; FBpp0077723:c.[67+3334T>C]; FBpp0305227:c.[19+3334T>C]; FBpp0305228:c.[88+3334T>C]; FBpp0302929:c.[67+3334T>C]
2L mapping	528773	Deletion	3	GAT	-	47	74.4681	34.7714	Gene: FBgn0003963, Misc. feature: contig 2L_1_11 1..50000(1)	FBpp0302929:c.[67+3337_67+3339delGAT]; FBpp0077723:c.[67+3337_67+3339delGAT]; FBpp0301730:c.[88+3337_88+3339delGAT]; FBpp0305228:c.[88+3337_88+3339delGAT]; FBpp0305227:c.[19+3337_19+3339delGAT]
2L mapping	528911	SNV	1	C	G	49	100	34.898	Gene: FBgn0003963, Misc. feature: contig 2L_1_11 1..50000(1)	FBpp0305227:c.[19+3475C>G]; FBpp0302929:c.[67+3475C>G]; FBpp0077723:c.[67+3475C>G]; FBpp0305228:c.[88+3475C>G]; FBpp0301730:c.[88+3475C>G]
2L mapping	529085	Deletion	1	T	-	37	83.7838	33.9677	Gene: FBgn0003963, Misc. feature: contig 2L_1_11 1..50000(1)	FBpp0301730:c.[88+3649delT]; FBpp0305227:c.[19+3649delT]; FBpp0305228:c.[88+3649delT]; FBpp0302929:c.[67+3649delT]; FBpp0077723:c.[67+3649delT]
2L mapping	529157	SNV	1	T	C	49	100	35.2857	Gene: FBgn0003963, Misc. feature: contig 2L_1_11 1..50000(1)	FBpp0301730:c.[88+3721T>C]; FBpp0305227:c.[19+3721T>C]; FBpp0302929:c.[67+3721T>C]; FBpp0077723:c.[67+3721T>C]; FBpp0305228:c.[88+3721T>C]
2L mapping	529444	SNV	1	G	A	41	100	34.0488	Gene: FBgn0003963, Misc. feature: contig 2L_1_11 1..50000(1)	FBpp0302929:c.[67+4008G>A]; FBpp0305227:c.[19+4008G>A]; FBpp0301730:c.[88+4008G>A]; FBpp0305228:c.[88+4008G>A]; FBpp0077723:c.[67+4008G>A]
2L mapping	529476	SNV	1	A	G	44	100	34.5227	Gene: FBgn0003963, Misc. feature: contig 2L_1_11 1..50000(1)	FBpp0302929:c.[67+4040A>G]; FBpp0305228:c.[88+4040A>G]; FBpp0077723:c.[67+4040A>G]; FBpp0305227:c.[19+4040A>G]; FBpp0301730:c.[88+4040A>G]
2L mapping	529610	SNV	1	C	T	42	97.619	35.2195	Gene: FBgn0003963, Misc. feature: contig 2L_1_11 1..50000(1)	FBpp0077723:c.[67+4174C>T]; FBpp0305227:c.[19+4174C>T]; FBpp0302929:c.[67+4174C>T]; FBpp0301730:c.[88+4174C>T]; FBpp0305228:c.[88+4174C>T]
2L mapping	529727	Deletion	1	T	-	45	42.2222	33.4211	Gene: FBgn0003963, Misc. feature: contig 2L_1_11 1..50000(1)	FBpp0301730:c.[88+4291delT]; FBpp0305227:c.[19+4291delT]; FBpp0077723:c.[67+4291delT]; FBpp0305228:c.[88+4291delT]; FBpp0302929:c.[67+4291delT]
2L mapping	529755	Deletion	1	T	-	35	100	32.1714	Gene: FBgn0003963, Misc. feature: contig 2L_1_11 1..50000(1)	FBpp0305228:c.[88+4319delT]; FBpp0302929:c.[67+4319delT]; FBpp0301730:c.[88+4319delT]; FBpp0077723:c.[67+4319delT]; FBpp0305227:c.[19+4319delT]
2L mapping	529821	SNV	1	A	G	39	100	35	Gene: FBgn0003963, Misc. feature: contig 2L_1_11 1..50000(1)	FBpp0302929:c.[67+4385A>G]; FBpp0305228:c.[88+4385A>G]; FBpp0077723:c.[67+4385A>G]; FBpp0301730:c.[88+4385A>G]; FBpp0305227:c.[19+4385A>G]
2L mapping	529844	SNV	1	T	C	38	100	35.9474	Gene: FBgn0003963, Misc. feature: contig 2L_1_11 1..50000(1)	FBpp0301730:c.[88+4408T>C]; FBpp0077723:c.[67+4408T>C]; FBpp0305227:c.[19+4408T>C]; FBpp0305228:c.[88+4408T>C]; FBpp0302929:c.[67+4408T>C]
2L mapping	529943	SNV	1	T	G	44	100	35.6591	Gene: FBgn0003963, Misc. feature: contig 2L_1_11 1..50000(1)	FBpp0077723:c.[67+4507T>G]; FBpp0305227:c.[19+4507T>G]; FBpp0301730:c.[88+4507T>G]; FBpp0302929:c.[67+4507T>G]; FBpp0305228:c.[88+4507T>G]
2L mapping	529999	SNV	1	C	T	44	100	35.5227	Gene: FBgn0003963, Misc. feature: contig 2L_1_11 1..50000(1)	FBpp0077723:c.[67+4563C>T]; FBpp0305227:c.[19+4563C>T]; FBpp0301730:c.[88+4563C>T]; FBpp0305228:c.[88+4563C>T]; FBpp0302929:c.[67+4563C>T]
2L mapping	530029	SNV	1	T	G	44	100	35.2273	Gene: FBgn0003963, Misc. feature: contig 2L_1_11 1..50000(1)	FBpp0305228:c.[88+4593T>G]; FBpp0302929:c.[67+4593T>G]; FBpp0305227:c.[19+4593T>G]; FBpp0077723:c.[67+4593T>G]; FBpp0301730:c.[88+4593T>G]
2L mapping	530123	SNV	1	C	T	35	100	35.7143	Gene: FBgn0003963, Misc. feature: contig 2L_1_11 1..50000(1)	FBpp0305228:c.[88+4687C>T]; FBpp0302929:c.[67+4687C>T]; FBpp0077723:c.[67+4687C>T]; FBpp0301730:c.[88+4687C>T]; FBpp0305227:c.[19+4687C>T]
2L mapping	530262	SNV	1	A	G	35	100	35.4857	Gene: FBgn0003963, Misc. feature: contig 2L_1_11 1..50000(1)	FBpp0305227:c.[19+4826A>G]; FBpp0302929:c.[67+4826A>G]; FBpp0077723:c.[67+4826A>G]; FBpp0301730:c.[88+4826A>G]; FBpp0305228:c.[88+4826A>G]
2L mapping	530266	SNV	1	G	T	33	100	33.6667	Gene: FBgn0003963, Misc. feature: contig 2L_1_11 1..50000(1)	FBpp0302929:c.[67+4830G>T]; FBpp0301730:c.[88+4830G>T]; FBpp0305228:c.[88+4830G>T]; FBpp0077723:c.[67+4830G>T]; FBpp0305227:c.[19+4830G>T]
2L mapping	530327	Insertion	5	-	AGCCA	19	94.7368	35.9889	Gene: FBgn0003963, Misc. feature: contig 2L_1_11 1..50000(1)	FBpp0077723:c.[67+4890_67+4891insAGCCA]; FBpp0301730:c.[88+4890_88+4891insAGCCA]; FBpp0305228:c.[88+4890_88+4891insAGCCA]; FBpp0305227:c.[19+4890_19+4891insAGCCA]; FBpp0302929:c.[67+4890_67+4891insAGCCA]
2L mapping	530329	Replacement	3	T	CCA	19	100	35.193	Gene: FBgn0003963, Misc. feature: contig 2L_1_11 1..50000(1)	FBpp0301730:c.[88+4893delTinsCCA]; FBpp0077723:c.[67+4893delTinsCCA]; FBpp0305228:c.[88+4893delTinsCCA]; FBpp0302929:c.[67+4893delTinsCCA]; FBpp0305227:c.[19+4893delTinsCCA]
2L mapping	530354	SNV	1	C	T	30	100	35.8	Gene: FBgn0003963, Misc. feature: contig 2L_1_11 1..50000(1)	FBpp0305228:c.[88+4918C>T]; FBpp0077723:c.[67+4918C>T]; FBpp0305227:c.[19+4918C>T]; FBpp0301730:c.[88+4918C>T]; FBpp0302929:c.[67+4918C>T]
2L mapping	530374	SNV	1	C	A	42	97.619	32.6341	Gene: FBgn0003963, Misc. feature: contig 2L_1_11 1..50000(1)	FBpp0301730:c.[88+4938C>A]; FBpp0077723:c.[67+4938C>A]; FBpp0305227:c.[19+4938C>A]; FBpp0302929:c.[67+4938C>A]; FBpp0305228:c.[88+4938C>A]
2L mapping	530476	SNV	1	T	C	26	100	34.3846	Gene: FBgn0003963, Misc. feature: contig 2L_1_11 1..50000(1)	FBpp0305228:c.[88+5040T>C]; FBpp0077723:c.[67+5040T>C]; FBpp0302929:c.[67+5040T>C]; FBpp0301730:c.[88+5040T>C]; FBpp0305227:c.[19+5040T>C]
2L mapping	530481	SNV	1	G	A	26	100	32.8462	Gene: FBgn0003963, Misc. feature: contig 2L_1_11 1..50000(1)	FBpp0302929:c.[67+5045G>A]; FBpp0301730:c.[88+5045G>A]; FBpp0077723:c.[67+5045G>A]; FBpp0305228:c.[88+5045G>A]; FBpp0305227:c.[19+5045G>A]
2L mapping	530485	SNV	1	G	T	28	100	34.9643	Gene: FBgn0003963, Misc. feature: contig 2L_1_11 1..50000(1)	FBpp0077723:c.[67+5049G>T]; FBpp0301730:c.[88+5049G>T]; FBpp0302929:c.[67+5049G>T]; FBpp0305228:c.[88+5049G>T]; FBpp0305227:c.[19+5049G>T]
2L mapping	530615	SNV	1	G	T	37	100	34.7297	Gene: FBgn0003963, Misc. feature: contig 2L_1_11 1..50000(1)	FBpp0305227:c.[19+5179G>T]; FBpp0302929:c.[67+5179G>T]; FBpp0301730:c.[88+5179G>T]; FBpp0305228:c.[88+5179G>T]; FBpp0077723:c.[67+5179G>T]
2L mapping	530772	SNV	1	A	G	27	100	32.8519	Gene: FBgn0003963, Misc. feature: contig 2L_1_11 1..50000(1)	FBpp0305228:c.[89-5251A>G]; FBpp0302929:c.[68-5251A>G]; FBpp0305227:c.[20-5251A>G]; FBpp0077723:c.[68-5251A>G]; FBpp0301730:c.[89-5251A>G]
2L mapping	530785	SNV	1	A	T	26	92.3077	30.625	Gene: FBgn0003963, Misc. feature: contig 2L_1_11 1..50000(1)	FBpp0305228:c.[89-5238A>T]; FBpp0302929:c.[68-5238A>T]; FBpp0301730:c.[89-5238A>T]; FBpp0305227:c.[20-5238A>T]; FBpp0077723:c.[68-5238A>T]
2L mapping	530887	SNV	1	A	G	27	100	31.9259	Gene: FBgn0003963, Misc. feature: contig 2L_1_11 1..50000(1)	FBpp0302929:c.[68-5136A>G]; FBpp0301730:c.[89-5136A>G]; FBpp0305228:c.[89-5136A>G]; FBpp0305227:c.[20-5136A>G]; FBpp0077723:c.[68-5136A>G]
2L mapping	530965	Insertion	2	-	AA	27	44.4444	36.8333	Gene: FBgn0003963, Misc. feature: contig 2L_1_11 1..50000(1)	FBpp0305228:c.[89-5059_89-5058insAA]; FBpp0305227:c.[20-5059_20-5058insAA]; FBpp0302929:c.[68-5059_68-5058insAA]; FBpp0301730:c.[89-5059_89-5058insAA]; FBpp0077723:c.[68-5059_68-5058insAA]
2L mapping	531154	Insertion	1	-	G	31	96.7742	35.9333	Gene: FBgn0003963, Misc. feature: contig 2L_1_11 1..50000(1)	FBpp0302929:c.[68-4870_68-4869insG]; FBpp0305228:c.[89-4870_89-4869insG]; FBpp0305227:c.[20-4870_20-4869insG]; FBpp0301730:c.[89-4870_89-4869insG]; FBpp0077723:c.[68-4870_68-4869insG]
2L mapping	531223	SNV	1	G	A	44	97.7273	33.3721	Gene: FBgn0003963, Misc. feature: contig 2L_1_11 1..50000(1)	FBpp0301730:c.[89-4800G>A]; FBpp0302929:c.[68-4800G>A]; FBpp0305228:c.[89-4800G>A]; FBpp0077723:c.[68-4800G>A]; FBpp0305227:c.[20-4800G>A]
2L mapping	531260	SNV	1	T	G	49	100	34.4898	Gene: FBgn0003963, Misc. feature: contig 2L_1_11 1..50000(1)	FBpp0302929:c.[68-4763T>G]; FBpp0305227:c.[20-4763T>G]; FBpp0301730:c.[89-4763T>G]; FBpp0077723:c.[68-4763T>G]; FBpp0305228:c.[89-4763T>G]
2L mapping	531280	SNV	1	C	G	45	100	34.9556	Gene: FBgn0003963, Misc. feature: contig 2L_1_11 1..50000(1)	FBpp0077723:c.[68-4743C>G]; FBpp0302929:c.[68-4743C>G]; FBpp0305227:c.[20-4743C>G]; FBpp0305228:c.[89-4743C>G]; FBpp0301730:c.[89-4743C>G]
2L mapping	531315	SNV	1	A	T	34	64.7059	34.4545	Gene: FBgn0003963, Misc. feature: contig 2L_1_11 1..50000(1)	FBpp0302929:c.[68-4708A>T]; FBpp0077723:c.[68-4708A>T]; FBpp0305227:c.[20-4708A>T]; FBpp0301730:c.[89-4708A>T]; FBpp0305228:c.[89-4708A>T]
2L mapping	531453	SNV	1	G	A	34	100	34.4412	Gene: FBgn0003963, Misc. feature: contig 2L_1_11 1..50000(1)	FBpp0077723:c.[68-4570G>A]; FBpp0302929:c.[68-4570G>A]; FBpp0305227:c.[20-4570G>A]; FBpp0301730:c.[89-4570G>A]; FBpp0305228:c.[89-4570G>A]
2L mapping	531730	SNV	1	T	A	28	35.7143	36.2	Gene: FBgn0003963, Misc. feature: contig 2L_1_11 1..50000(1)	FBpp0305228:c.[89-4293T>A]; FBpp0302929:c.[68-4293T>A]; FBpp0077723:c.[68-4293T>A]; FBpp0305227:c.[20-4293T>A]; FBpp0301730:c.[89-4293T>A]
2L mapping	531863	SNV	1	G	C	32	100	36.5625	Gene: FBgn0003963, Misc. feature: contig 2L_1_11 1..50000(1)	FBpp0301730:c.[89-4160G>C]; FBpp0077723:c.[68-4160G>C]; FBpp0305228:c.[89-4160G>C]; FBpp0305227:c.[20-4160G>C]; FBpp0302929:c.[68-4160G>C]
2L mapping	531889	SNV	1	C	G	34	100	33.2353	Gene: FBgn0003963, Misc. feature: contig 2L_1_11 1..50000(1)	FBpp0302929:c.[68-4134C>G]; FBpp0305227:c.[20-4134C>G]; FBpp0077723:c.[68-4134C>G]; FBpp0305228:c.[89-4134C>G]; FBpp0301730:c.[89-4134C>G]
2L mapping	532224	SNV	1	G	A	35	100	32.4571	Gene: FBgn0003963, Misc. feature: contig 2L_1_11 1..50000(1)	FBpp0305227:c.[20-3799G>A]; FBpp0302929:c.[68-3799G>A]; FBpp0077723:c.[68-3799G>A]; FBpp0305228:c.[89-3799G>A]; FBpp0301730:c.[89-3799G>A]
2L mapping	532254	SNV	1	A	G	36	100	34.8333	Gene: FBgn0003963, Misc. feature: contig 2L_1_11 1..50000(1)	FBpp0302929:c.[68-3769A>G]; FBpp0301730:c.[89-3769A>G]; FBpp0305227:c.[20-3769A>G]; FBpp0305228:c.[89-3769A>G]; FBpp0077723:c.[68-3769A>G]
2L mapping	532265	SNV	1	G	T	40	100	35.55	Gene: FBgn0003963, Misc. feature: contig 2L_1_11 1..50000(1)	FBpp0301730:c.[89-3758G>T]; FBpp0305227:c.[20-3758G>T]; FBpp0302929:c.[68-3758G>T]; FBpp0077723:c.[68-3758G>T]; FBpp0305228:c.[89-3758G>T]
2L mapping	532283	SNV	1	A	G	39	100	34	Gene: FBgn0003963, Misc. feature: contig 2L_1_11 1..50000(1)	FBpp0302929:c.[68-3740A>G]; FBpp0301730:c.[89-3740A>G]; FBpp0305227:c.[20-3740A>G]; FBpp0305228:c.[89-3740A>G]; FBpp0077723:c.[68-3740A>G]
2L mapping	532597	MNV	2	CA	AG	40	97.5	35.0256	Gene: FBgn0003963, Misc. feature: contig 2L_1_11 1..50000(1)	FBpp0305227:c.[20-3426_20-3425delCAinsAG]; FBpp0305228:c.[89-3426_89-3425delCAinsAG]; FBpp0077723:c.[68-3426_68-3425delCAinsAG]; FBpp0302929:c.[68-3426_68-3425delCAinsAG]; FBpp0301730:c.[89-3426_89-3425delCAinsAG]
2L mapping	532624	SNV	1	C	A	42	100	34.9524	Gene: FBgn0003963, Misc. feature: contig 2L_1_11 1..50000(1)	FBpp0305228:c.[89-3399C>A]; FBpp0077723:c.[68-3399C>A]; FBpp0302929:c.[68-3399C>A]; FBpp0305227:c.[20-3399C>A]; FBpp0301730:c.[89-3399C>A]
2L mapping	532668	SNV	1	A	G	45	100	34.5333	Gene: FBgn0003963, Misc. feature: contig 2L_1_11 1..50000(1)	FBpp0301730:c.[89-3355A>G]; FBpp0305228:c.[89-3355A>G]; FBpp0077723:c.[68-3355A>G]; FBpp0305227:c.[20-3355A>G]; FBpp0302929:c.[68-3355A>G]
2L mapping	532744	SNV	1	G	A	35	100	31.8857	Gene: FBgn0003963, Misc. feature: contig 2L_1_11 1..50000(1)	FBpp0302929:c.[68-3279G>A]; FBpp0305227:c.[20-3279G>A]; FBpp0305228:c.[89-3279G>A]; FBpp0077723:c.[68-3279G>A]; FBpp0301730:c.[89-3279G>A]
2L mapping	533185	SNV	1	G	A	28	96.4286	32.4444	Gene: FBgn0003963, Misc. feature: contig 2L_1_11 1..50000(1)	FBpp0305227:c.[20-2838G>A]; FBpp0302929:c.[68-2838G>A]; FBpp0077723:c.[68-2838G>A]; FBpp0305228:c.[89-2838G>A]; FBpp0301730:c.[89-2838G>A]
2L mapping	533191	Deletion	1	T	-	33	93.9394	30.4839	Gene: FBgn0003963, Misc. feature: contig 2L_1_11 1..50000(1)	FBpp0301730:c.[89-2832delT]; FBpp0302929:c.[68-2832delT]; FBpp0305228:c.[89-2832delT]; FBpp0305227:c.[20-2832delT]; FBpp0077723:c.[68-2832delT]
2L mapping	533393	SNV	1	G	A	26	100	35.0385	Gene: FBgn0003963, Misc. feature: contig 2L_1_11 1..50000(1)	FBpp0302929:c.[68-2630G>A]; FBpp0301730:c.[89-2630G>A]; FBpp0305228:c.[89-2630G>A]; FBpp0305227:c.[20-2630G>A]; FBpp0077723:c.[68-2630G>A]
2L mapping	533396	SNV	1	T	G	25	100	33.84	Gene: FBgn0003963, Misc. feature: contig 2L_1_11 1..50000(1)	FBpp0305227:c.[20-2627T>G]; FBpp0305228:c.[89-2627T>G]; FBpp0302929:c.[68-2627T>G]; FBpp0077723:c.[68-2627T>G]; FBpp0301730:c.[89-2627T>G]
2L mapping	533403	SNV	1	C	T	24	100	36.4167	Gene: FBgn0003963, Misc. feature: contig 2L_1_11 1..50000(1)	FBpp0302929:c.[68-2620C>T]; FBpp0077723:c.[68-2620C>T]; FBpp0301730:c.[89-2620C>T]; FBpp0305228:c.[89-2620C>T]; FBpp0305227:c.[20-2620C>T]
2L mapping	533426	SNV	1	C	T	23	100	36.2174	Gene: FBgn0003963, Misc. feature: contig 2L_1_11 1..50000(1)	FBpp0305227:c.[20-2597C>T]; FBpp0077723:c.[68-2597C>T]; FBpp0301730:c.[89-2597C>T]; FBpp0305228:c.[89-2597C>T]; FBpp0302929:c.[68-2597C>T]
2L mapping	533507	SNV	1	G	A	35	100	34.6	Gene: FBgn0003963, Misc. feature: contig 2L_1_11 1..50000(1)	FBpp0077723:c.[68-2516G>A]; FBpp0305227:c.[20-2516G>A]; FBpp0305228:c.[89-2516G>A]; FBpp0302929:c.[68-2516G>A]; FBpp0301730:c.[89-2516G>A]
2L mapping	533659	SNV	1	T	C	31	100	34.6452	Gene: FBgn0003963, Misc. feature: contig 2L_1_11 1..50000(1)	FBpp0305228:c.[89-2364T>C]; FBpp0305227:c.[20-2364T>C]; FBpp0302929:c.[68-2364T>C]; FBpp0301730:c.[89-2364T>C]; FBpp0077723:c.[68-2364T>C]
2L mapping	533782	SNV	1	A	C	30	100	35.9333	Gene: FBgn0003963, Misc. feature: contig 2L_1_11 1..50000(1)	FBpp0302929:c.[68-2241A>C]; FBpp0301730:c.[89-2241A>C]; FBpp0305228:c.[89-2241A>C]; FBpp0305227:c.[20-2241A>C]; FBpp0077723:c.[68-2241A>C]
2L mapping	533805	SNV	1	A	T	31	100	32.5161	Gene: FBgn0003963, Misc. feature: contig 2L_1_11 1..50000(1)	FBpp0077723:c.[68-2218A>T]; FBpp0305228:c.[89-2218A>T]; FBpp0301730:c.[89-2218A>T]; FBpp0302929:c.[68-2218A>T]; FBpp0305227:c.[20-2218A>T]
2L mapping	534014	SNV	1	C	T	36	100	36.2778	Gene: FBgn0003963, Misc. feature: contig 2L_1_11 1..50000(1)	FBpp0305227:c.[20-2009C>T]; FBpp0305228:c.[89-2009C>T]; FBpp0302929:c.[68-2009C>T]; FBpp0301730:c.[89-2009C>T]; FBpp0077723:c.[68-2009C>T]
2L mapping	534024	SNV	1	A	T	38	100	34.6053	Gene: FBgn0003963, Misc. feature: contig 2L_1_11 1..50000(1)	FBpp0077723:c.[68-1999A>T]; FBpp0305228:c.[89-1999A>T]; FBpp0305227:c.[20-1999A>T]; FBpp0302929:c.[68-1999A>T]; FBpp0301730:c.[89-1999A>T]
2L mapping	534172	SNV	1	A	G	34	100	33.7941	Gene: FBgn0003963, Misc. feature: contig 2L_1_11 1..50000(1)	FBpp0302929:c.[68-1851A>G]; FBpp0077723:c.[68-1851A>G]; FBpp0305227:c.[20-1851A>G]; FBpp0301730:c.[89-1851A>G]; FBpp0305228:c.[89-1851A>G]
2L mapping	534220	SNV	1	T	G	42	100	35.7381	Gene: FBgn0003963, Misc. feature: contig 2L_1_11 1..50000(1)	FBpp0301730:c.[89-1803T>G]; FBpp0305228:c.[89-1803T>G]; FBpp0302929:c.[68-1803T>G]; FBpp0077723:c.[68-1803T>G]; FBpp0305227:c.[20-1803T>G]
2L mapping	534404	SNV	1	G	T	30	100	33.8333	Gene: FBgn0003963, Misc. feature: contig 2L_1_11 1..50000(1)	FBpp0077723:c.[68-1619G>T]; FBpp0305228:c.[89-1619G>T]; FBpp0301730:c.[89-1619G>T]; FBpp0302929:c.[68-1619G>T]; FBpp0305227:c.[20-1619G>T]
2L mapping	534432	SNV	1	T	A	33	100	34.697	Gene: FBgn0003963, Misc. feature: contig 2L_1_11 1..50000(1)	FBpp0305228:c.[89-1591T>A]; FBpp0302929:c.[68-1591T>A]; FBpp0305227:c.[20-1591T>A]; FBpp0301730:c.[89-1591T>A]; FBpp0077723:c.[68-1591T>A]
2L mapping	534462	SNV	1	C	T	43	100	33.8605	Gene: FBgn0003963, Misc. feature: contig 2L_1_11 1..50000(1)	FBpp0077723:c.[68-1561C>T]; FBpp0305228:c.[89-1561C>T]; FBpp0301730:c.[89-1561C>T]; FBpp0305227:c.[20-1561C>T]; FBpp0302929:c.[68-1561C>T]
2L mapping	534468	SNV	1	T	C	42	100	33.1667	Gene: FBgn0003963, Misc. feature: contig 2L_1_11 1..50000(1)	FBpp0305227:c.[20-1555T>C]; FBpp0302929:c.[68-1555T>C]; FBpp0077723:c.[68-1555T>C]; FBpp0301730:c.[89-1555T>C]; FBpp0305228:c.[89-1555T>C]
2L mapping	534700	SNV	1	C	T	41	100	34.9756	Gene: FBgn0003963, Misc. feature: contig 2L_1_11 1..50000(1)	FBpp0077723:c.[68-1323C>T]; FBpp0305228:c.[89-1323C>T]; FBpp0302929:c.[68-1323C>T]; FBpp0301730:c.[89-1323C>T]; FBpp0305227:c.[20-1323C>T]
2L mapping	534985	SNV	1	G	A	48	97.9167	35.6383	Gene: FBgn0003963, Misc. feature: contig 2L_1_11 1..50000(1)	FBpp0302929:c.[68-1038G>A]; FBpp0301730:c.[89-1038G>A]; FBpp0077723:c.[68-1038G>A]; FBpp0305227:c.[20-1038G>A]; FBpp0305228:c.[89-1038G>A]
2L mapping	535024	SNV	1	T	G	39	97.4359	34.8158	Gene: FBgn0003963, Misc. feature: contig 2L_1_11 1..50000(1)	FBpp0077723:c.[68-999T>G]; FBpp0302929:c.[68-999T>G]; FBpp0301730:c.[89-999T>G]; FBpp0305228:c.[89-999T>G]; FBpp0305227:c.[20-999T>G]
2L mapping	535033	SNV	1	C	A	44	97.7273	35.3953	Gene: FBgn0003963, Misc. feature: contig 2L_1_11 1..50000(1)	FBpp0301730:c.[89-990C>A]; FBpp0305227:c.[20-990C>A]; FBpp0077723:c.[68-990C>A]; FBpp0305228:c.[89-990C>A]; FBpp0302929:c.[68-990C>A]
2L mapping	535038	SNV	1	A	G	42	97.619	34.3171	Gene: FBgn0003963, Misc. feature: contig 2L_1_11 1..50000(1)	FBpp0302929:c.[68-985A>G]; FBpp0305227:c.[20-985A>G]; FBpp0077723:c.[68-985A>G]; FBpp0305228:c.[89-985A>G]; FBpp0301730:c.[89-985A>G]
2L mapping	535109	SNV	1	T	C	32	100	34.8438	Gene: FBgn0003963, Misc. feature: contig 2L_1_11 1..50000(1)	FBpp0077723:c.[68-914T>C]; FBpp0305228:c.[89-914T>C]; FBpp0301730:c.[89-914T>C]; FBpp0305227:c.[20-914T>C]; FBpp0302929:c.[68-914T>C]
2L mapping	535256	SNV	1	G	T	35	100	33.0286	Gene: FBgn0003963, Misc. feature: contig 2L_1_11 1..50000(1)	FBpp0305228:c.[89-767G>T]; FBpp0301730:c.[89-767G>T]; FBpp0302929:c.[68-767G>T]; FBpp0077723:c.[68-767G>T]; FBpp0305227:c.[20-767G>T]
2L mapping	535681	Deletion	2	TA	-	44	54.5455	35.375	Gene: FBgn0003963, Misc. feature: contig 2L_1_11 1..50000(1)	FBpp0077723:c.[68-342_68-341delTA]; FBpp0305228:c.[89-342_89-341delTA]; FBpp0301730:c.[89-342_89-341delTA]; FBpp0302929:c.[68-342_68-341delTA]; FBpp0305227:c.[20-342_20-341delTA]
2L mapping	535685	Replacement	2	CA	G	35	68.5714	35.8958	Gene: FBgn0003963, Misc. feature: contig 2L_1_11 1..50000(1)	FBpp0301730:c.[89-338_89-337delCAinsG]; FBpp0302929:c.[68-338_68-337delCAinsG]; FBpp0077723:c.[68-338_68-337delCAinsG]; FBpp0305228:c.[89-338_89-337delCAinsG]; FBpp0305227:c.[20-338_20-337delCAinsG]
2L mapping	535689	Deletion	2	CT	-	24	100	35.0417	Gene: FBgn0003963, Misc. feature: contig 2L_1_11 1..50000(1)	FBpp0305227:c.[20-334_20-333delCT]; FBpp0301730:c.[89-334_89-333delCT]; FBpp0305228:c.[89-334_89-333delCT]; FBpp0302929:c.[68-334_68-333delCT]; FBpp0077723:c.[68-334_68-333delCT]
2L mapping	535692	Deletion	1	T	-	24	100	34.875	Gene: FBgn0003963, Misc. feature: contig 2L_1_11 1..50000(1)	FBpp0305227:c.[20-331delT]; FBpp0302929:c.[68-331delT]; FBpp0305228:c.[89-331delT]; FBpp0301730:c.[89-331delT]; FBpp0077723:c.[68-331delT]
2L mapping	535830	SNV	1	T	A	42	100	34.5714	Gene: FBgn0003963, Misc. feature: contig 2L_1_11 1..50000(1)	FBpp0302929:c.[68-193T>A]; FBpp0305227:c.[20-193T>A]; FBpp0305228:c.[89-193T>A]; FBpp0077723:c.[68-193T>A]; FBpp0301730:c.[89-193T>A]
2L mapping	535969	SNV	1	A	G	46	100	35.6304	Gene: FBgn0003963, Misc. feature: contig 2L_1_11 1..50000(1)	FBpp0301730:c.[89-54A>G]; FBpp0305227:c.[20-54A>G]; FBpp0077723:c.[68-54A>G]; FBpp0305228:c.[89-54A>G]; FBpp0302929:c.[68-54A>G]
2L mapping	536010	SNV	1	T	G	45	100	34.9111	Gene: FBgn0003963, Misc. feature: contig 2L_1_11 1..50000(1)	FBpp0305228:c.[89-13T>G]; FBpp0077723:c.[68-13T>G]; FBpp0301730:c.[89-13T>G]; FBpp0305227:c.[20-13T>G]; FBpp0302929:c.[68-13T>G]
2L mapping	536430	SNV	1	G	A	34	100	33.8529	CDS: FBgn0003963, CDS: FBgn0003963, CDS: FBgn0003963, CDS: FBgn0003963, CDS: FBgn0003963, Exon: Exon, Gene: FBgn0003963, Misc. feature: contig 2L_1_11 1..50000(1), mRNA: FBgn0003963, mRNA: FBgn0003963, mRNA: FBgn0003963, mRNA: FBgn0003963, mRNA: FBgn0003963	FBpp0301730:c.[496G>A]; FBpp0305227:c.[427G>A]; FBpp0077723:c.[475G>A]; FBpp0302929:c.[475G>A]; FBpp0305228:c.[496G>A]	FBpp0301730:p.[Ala166Thr]; FBpp0305227:p.[Ala143Thr]; FBpp0077723:p.[Ala159Thr]; FBpp0302929:p.[Ala159Thr]; FBpp0305228:p.[Ala166Thr]
2L mapping	536642	SNV	1	C	T	40	95	32.6842	CDS: FBgn0003963, CDS: FBgn0003963, CDS: FBgn0003963, CDS: FBgn0003963, CDS: FBgn0003963, Exon: Exon, Gene: FBgn0003963, Misc. feature: contig 2L_1_11 1..50000(1), mRNA: FBgn0003963, mRNA: FBgn0003963, mRNA: FBgn0003963, mRNA: FBgn0003963, mRNA: FBgn0003963	FBpp0302929:c.[687C>T]; FBpp0305227:c.[639C>T]; FBpp0305228:c.[708C>T]; FBpp0301730:c.[708C>T]; FBpp0077723:c.[687C>T]
2L mapping	536744	SNV	1	A	G	35	100	33.0286	CDS: FBgn0003963, CDS: FBgn0003963, CDS: FBgn0003963, CDS: FBgn0003963, CDS: FBgn0003963, Exon: Exon, Gene: FBgn0003963, Misc. feature: contig 2L_1_11 1..50000(1), mRNA: FBgn0003963, mRNA: FBgn0003963, mRNA: FBgn0003963, mRNA: FBgn0003963, mRNA: FBgn0003963	FBpp0302929:c.[789A>G]; FBpp0305227:c.[741A>G]; FBpp0305228:c.[810A>G]; FBpp0301730:c.[810A>G]; FBpp0077723:c.[789A>G]
2L mapping	536751	SNV	1	A	G	34	100	35.7353	CDS: FBgn0003963, CDS: FBgn0003963, CDS: FBgn0003963, CDS: FBgn0003963, CDS: FBgn0003963, Exon: Exon, Gene: FBgn0003963, Misc. feature: contig 2L_1_11 1..50000(1), mRNA: FBgn0003963, mRNA: FBgn0003963, mRNA: FBgn0003963, mRNA: FBgn0003963, mRNA: FBgn0003963	FBpp0305228:c.[817A>G]; FBpp0077723:c.[796A>G]; FBpp0305227:c.[748A>G]; FBpp0301730:c.[817A>G]; FBpp0302929:c.[796A>G]	FBpp0305228:p.[Thr273Ala]; FBpp0077723:p.[Thr266Ala]; FBpp0305227:p.[Thr250Ala]; FBpp0301730:p.[Thr273Ala]; FBpp0302929:p.[Thr266Ala]
2L mapping	537216	SNV	1	A	T	33	100	34.0606	CDS: FBgn0003963, CDS: FBgn0003963, CDS: FBgn0003963, CDS: FBgn0003963, CDS: FBgn0003963, Exon: Exon, Gene: FBgn0003963, Misc. feature: contig 2L_1_11 1..50000(1), mRNA: FBgn0003963, mRNA: FBgn0003963, mRNA: FBgn0003963, mRNA: FBgn0003963, mRNA: FBgn0003963	FBpp0305228:c.[1212A>T]; FBpp0302929:c.[1191A>T]; FBpp0305227:c.[1143A>T]; FBpp0301730:c.[1212A>T]; FBpp0077723:c.[1191A>T]
2L mapping	537438	SNV	1	T	G	28	100	35.4643	Gene: FBgn0003963, Misc. feature: contig 2L_1_11 1..50000(1)	FBpp0077723:c.[1406+7T>G]; FBpp0302929:c.[1406+7T>G]; FBpp0301730:c.[1427+7T>G]; FBpp0305227:c.[1358+7T>G]; FBpp0305228:c.[1427+7T>G]
2L mapping	537450	SNV	1	A	C	29	100	36.069	Gene: FBgn0003963, Misc. feature: contig 2L_1_11 1..50000(1)	FBpp0305227:c.[1358+19A>C]; FBpp0302929:c.[1406+19A>C]; FBpp0077723:c.[1406+19A>C]; FBpp0305228:c.[1427+19A>C]; FBpp0301730:c.[1427+19A>C]
2L mapping	537748	SNV	1	A	C	32	96.875	35.8065	CDS: FBgn0003963, CDS: FBgn0003963, CDS: FBgn0003963, CDS: FBgn0003963, CDS: FBgn0003963, Exon: Exon, Gene: FBgn0003963, Misc. feature: contig 2L_1_11 1..50000(1), mRNA: FBgn0003963, mRNA: FBgn0003963, mRNA: FBgn0003963, mRNA: FBgn0003963, mRNA: FBgn0003963	FBpp0305228:c.[1627A>C]; FBpp0305227:c.[1558A>C]; FBpp0077723:c.[1606A>C]; FBpp0302929:c.[1606A>C]; FBpp0301730:c.[1627A>C]
2L mapping	537759	Insertion	2	-	TA	31	83.871	34.1731	Gene: FBgn0003963, Misc. feature: contig 2L_1_11 1..50000(1)	FBpp0301730:c.[1628+9_1628+10insTA]; FBpp0305227:c.[1559+9_1559+10insTA]; FBpp0077723:c.[1607+9_1607+10insTA]; FBpp0302929:c.[1607+9_1607+10insTA]; FBpp0305228:c.[1628+9_1628+10insTA]
2L mapping	537777	SNV	1	G	C	33	100	33.3636	Gene: FBgn0003963, Misc. feature: contig 2L_1_11 1..50000(1)	FBpp0302929:c.[1607+28G>C]; FBpp0305227:c.[1559+28G>C]; FBpp0301730:c.[1628+28G>C]; FBpp0077723:c.[1607+28G>C]; FBpp0305228:c.[1628+28G>C]
2L mapping	537905	SNV	1	C	T	35	100	34.7143	CDS: FBgn0003963, CDS: FBgn0003963, CDS: FBgn0003963, CDS: FBgn0003963, CDS: FBgn0003963, Exon: Exon, Gene: FBgn0003963, Misc. feature: contig 2L_1_11 1..50000(1), mRNA: FBgn0003963, mRNA: FBgn0003963, mRNA: FBgn0003963, mRNA: FBgn0003963, mRNA: FBgn0003963	FBpp0077723:c.[1650C>T]; FBpp0305227:c.[1602C>T]; FBpp0305228:c.[1671C>T]; FBpp0302929:c.[1650C>T]; FBpp0301730:c.[1671C>T]
2L mapping	537985	SNV	1	T	C	41	100	35.8293	CDS: FBgn0003963, CDS: FBgn0003963, CDS: FBgn0003963, CDS: FBgn0003963, CDS: FBgn0003963, Exon: Exon, Gene: FBgn0003963, Misc. feature: contig 2L_1_11 1..50000(1), mRNA: FBgn0003963, mRNA: FBgn0003963, mRNA: FBgn0003963, mRNA: FBgn0003963, mRNA: FBgn0003963	FBpp0305228:c.[1751T>C]; FBpp0301730:c.[1751T>C]; FBpp0302929:c.[1730T>C]; FBpp0077723:c.[1730T>C]; FBpp0305227:c.[1682T>C]	FBpp0305228:p.[Val584Ala]; FBpp0301730:p.[Val584Ala]; FBpp0302929:p.[Val577Ala]; FBpp0077723:p.[Val577Ala]; FBpp0305227:p.[Val561Ala]
2L mapping	538328	SNV	1	C	T	26	96.1538	34	CDS: FBgn0003963, CDS: FBgn0003963, CDS: FBgn0003963, CDS: FBgn0003963, CDS: FBgn0003963, Exon: Exon, Gene: FBgn0003963, Misc. feature: contig 2L_1_11 1..50000(1), mRNA: FBgn0003963, mRNA: FBgn0003963, mRNA: FBgn0003963, mRNA: FBgn0003963, mRNA: FBgn0003963	FBpp0305227:c.[2025C>T]; FBpp0302929:c.[2073C>T]; FBpp0077723:c.[2073C>T]; FBpp0305228:c.[2094C>T]; FBpp0301730:c.[2094C>T]
2L mapping	538334	SNV	1	C	A	28	100	31.5357	CDS: FBgn0003963, CDS: FBgn0003963, CDS: FBgn0003963, CDS: FBgn0003963, CDS: FBgn0003963, Exon: Exon, Gene: FBgn0003963, Misc. feature: contig 2L_1_11 1..50000(1), mRNA: FBgn0003963, mRNA: FBgn0003963, mRNA: FBgn0003963, mRNA: FBgn0003963, mRNA: FBgn0003963	FBpp0302929:c.[2079C>A]; FBpp0301730:c.[2100C>A]; FBpp0305227:c.[2031C>A]; FBpp0077723:c.[2079C>A]; FBpp0305228:c.[2100C>A]
2L mapping	538338	SNV	1	T	A	29	96.5517	31.5	CDS: FBgn0003963, CDS: FBgn0003963, CDS: FBgn0003963, CDS: FBgn0003963, CDS: FBgn0003963, Exon: Exon, Gene: FBgn0003963, Misc. feature: contig 2L_1_11 1..50000(1), mRNA: FBgn0003963, mRNA: FBgn0003963, mRNA: FBgn0003963, mRNA: FBgn0003963, mRNA: FBgn0003963	FBpp0302929:c.[2083T>A]; FBpp0301730:c.[2104T>A]; FBpp0305227:c.[2035T>A]; FBpp0305228:c.[2104T>A]; FBpp0077723:c.[2083T>A]	FBpp0302929:p.[Ser695Thr]; FBpp0301730:p.[Ser702Thr]; FBpp0305227:p.[Ser679Thr]; FBpp0305228:p.[Ser702Thr]; FBpp0077723:p.[Ser695Thr]
2L mapping	538460	SNV	1	T	C	35	100	34.6286	CDS: FBgn0003963, CDS: FBgn0003963, CDS: FBgn0003963, CDS: FBgn0003963, CDS: FBgn0003963, Exon: Exon, Gene: FBgn0003963, Misc. feature: contig 2L_1_11 1..50000(1), mRNA: FBgn0003963, mRNA: FBgn0003963, mRNA: FBgn0003963, mRNA: FBgn0003963, mRNA: FBgn0003963	FBpp0305228:c.[2226T>C]; FBpp0302929:c.[2205T>C]; FBpp0077723:c.[2205T>C]; FBpp0301730:c.[2226T>C]; FBpp0305227:c.[2157T>C]
2L mapping	538520	SNV	1	A	G	34	100	34.0882	CDS: FBgn0003963, CDS: FBgn0003963, CDS: FBgn0003963, CDS: FBgn0003963, CDS: FBgn0003963, Exon: Exon, Gene: FBgn0003963, Misc. feature: contig 2L_1_11 1..50000(1), mRNA: FBgn0003963, mRNA: FBgn0003963, mRNA: FBgn0003963, mRNA: FBgn0003963, mRNA: FBgn0003963	FBpp0305228:c.[2286A>G]; FBpp0077723:c.[2265A>G]; FBpp0305227:c.[2217A>G]; FBpp0302929:c.[2265A>G]; FBpp0301730:c.[2286A>G]
2L mapping	538524	SNV	1	G	A	36	97.2222	35.4857	CDS: FBgn0003963, CDS: FBgn0003963, CDS: FBgn0003963, CDS: FBgn0003963, CDS: FBgn0003963, Exon: Exon, Gene: FBgn0003963, Misc. feature: contig 2L_1_11 1..50000(1), mRNA: FBgn0003963, mRNA: FBgn0003963, mRNA: FBgn0003963, mRNA: FBgn0003963, mRNA: FBgn0003963	FBpp0301730:c.[2290G>A]; FBpp0305228:c.[2290G>A]; FBpp0305227:c.[2221G>A]; FBpp0302929:c.[2269G>A]; FBpp0077723:c.[2269G>A]	FBpp0301730:p.[Ala764Thr]; FBpp0305228:p.[Ala764Thr]; FBpp0305227:p.[Ala741Thr]; FBpp0302929:p.[Ala757Thr]; FBpp0077723:p.[Ala757Thr]
2L mapping	538541	SNV	1	C	T	28	100	34.0714	CDS: FBgn0003963, CDS: FBgn0003963, CDS: FBgn0003963, CDS: FBgn0003963, CDS: FBgn0003963, Exon: Exon, Gene: FBgn0003963, Misc. feature: contig 2L_1_11 1..50000(1), mRNA: FBgn0003963, mRNA: FBgn0003963, mRNA: FBgn0003963, mRNA: FBgn0003963, mRNA: FBgn0003963	FBpp0077723:c.[2286C>T]; FBpp0305227:c.[2238C>T]; FBpp0301730:c.[2307C>T]; FBpp0302929:c.[2286C>T]; FBpp0305228:c.[2307C>T]
2L mapping	538601	SNV	1	G	A	29	100	34.7241	CDS: FBgn0003963, CDS: FBgn0003963, CDS: FBgn0003963, CDS: FBgn0003963, CDS: FBgn0003963, Exon: Exon, Gene: FBgn0003963, Misc. feature: contig 2L_1_11 1..50000(1), mRNA: FBgn0003963, mRNA: FBgn0003963, mRNA: FBgn0003963, mRNA: FBgn0003963, mRNA: FBgn0003963	FBpp0305228:c.[2367G>A]; FBpp0301730:c.[2367G>A]; FBpp0302929:c.[2346G>A]; FBpp0305227:c.[2298G>A]; FBpp0077723:c.[2346G>A]
2L mapping	538799	SNV	1	G	T	28	96.4286	35.1111	CDS: FBgn0003963, CDS: FBgn0003963, CDS: FBgn0003963, CDS: FBgn0003963, CDS: FBgn0003963, Exon: Exon, Gene: FBgn0003963, Misc. feature: contig 2L_1_11 1..50000(1), mRNA: FBgn0003963, mRNA: FBgn0003963, mRNA: FBgn0003963, mRNA: FBgn0003963, mRNA: FBgn0003963	FBpp0302929:c.[2544G>T]; FBpp0305227:c.[2496G>T]; FBpp0077723:c.[2544G>T]; FBpp0301730:c.[2565G>T]; FBpp0305228:c.[2565G>T]	FBpp0302929:p.[Lys848Asn]; FBpp0305227:p.[Lys832Asn]; FBpp0077723:p.[Lys848Asn]; FBpp0301730:p.[Lys855Asn]; FBpp0305228:p.[Lys855Asn]
2L mapping	539448	SNV	1	C	G	44	97.7273	34.5116	CDS: FBgn0003963, CDS: FBgn0003963, CDS: FBgn0003963, CDS: FBgn0003963, CDS: FBgn0003963, Exon: Exon, Gene: FBgn0003963, Misc. feature: contig 2L_1_11 1..50000(1), mRNA: FBgn0003963, mRNA: FBgn0003963, mRNA: FBgn0003963, mRNA: FBgn0003963, mRNA: FBgn0003963	FBpp0305228:c.[3154C>G]; FBpp0301730:c.[3154C>G]; FBpp0305227:c.[3085C>G]; FBpp0077723:c.[3133C>G]; FBpp0302929:c.[3133C>G]	FBpp0305228:p.[Pro1052Ala]; FBpp0301730:p.[Pro1052Ala]; FBpp0305227:p.[Pro1029Ala]; FBpp0077723:p.[Pro1045Ala]; FBpp0302929:p.[Pro1045Ala]
2L mapping	539462	SNV	1	A	G	41	100	34.561	Gene: FBgn0003963, Misc. feature: contig 2L_1_11 1..50000(1)	FBpp0305228:c.[3158+10A>G]; FBpp0302929:c.[3137+10A>G]; FBpp0301730:c.[3158+10A>G]; FBpp0305227:c.[3089+10A>G]; FBpp0077723:c.[3137+10A>G]
2L mapping	539466	SNV	1	G	A	41	97.561	35.775	Gene: FBgn0003963, Misc. feature: contig 2L_1_11 1..50000(1)	FBpp0305228:c.[3158+14G>A]; FBpp0302929:c.[3137+14G>A]; FBpp0305227:c.[3089+14G>A]; FBpp0077723:c.[3137+14G>A]; FBpp0301730:c.[3158+14G>A]
2L mapping	539507	SNV	1	C	T	46	100	35.1739	Gene: FBgn0003963, Misc. feature: contig 2L_1_11 1..50000(1)	FBpp0302929:c.[3138-11C>T]; FBpp0301730:c.[3159-11C>T]; FBpp0077723:c.[3138-11C>T]; FBpp0305227:c.[3090-11C>T]; FBpp0305228:c.[3159-11C>T]
2L mapping	539513	SNV	1	C	T	47	100	35.8085	Gene: FBgn0003963, Misc. feature: contig 2L_1_11 1..50000(1)	FBpp0077723:c.[3138-5C>T]; FBpp0305227:c.[3090-5C>T]; FBpp0302929:c.[3138-5C>T]; FBpp0301730:c.[3159-5C>T]; FBpp0305228:c.[3159-5C>T]
2L mapping	539686	SNV	1	C	T	35	100	34.7429	CDS: FBgn0003963, CDS: FBgn0003963, CDS: FBgn0003963, CDS: FBgn0003963, CDS: FBgn0003963, Exon: Exon, Exon: Exon, Gene: FBgn0003963, Misc. feature: contig 2L_1_11 1..50000(1), mRNA: FBgn0003963, mRNA: FBgn0003963, mRNA: FBgn0003963, mRNA: FBgn0003963, mRNA: FBgn0003963	FBpp0305228:c.[3327C>T]; FBpp0302929:c.[3306C>T]; FBpp0077723:c.[3306C>T]; FBpp0301730:c.[3327C>T]; FBpp0305227:c.[3258C>T]
2L mapping	539692	SNV	1	C	T	37	100	35.4595	CDS: FBgn0003963, CDS: FBgn0003963, CDS: FBgn0003963, CDS: FBgn0003963, CDS: FBgn0003963, Exon: Exon, Exon: Exon, Gene: FBgn0003963, Misc. feature: contig 2L_1_11 1..50000(1), mRNA: FBgn0003963, mRNA: FBgn0003963, mRNA: FBgn0003963, mRNA: FBgn0003963, mRNA: FBgn0003963	FBpp0077723:c.[3312C>T]; FBpp0305228:c.[3333C>T]; FBpp0302929:c.[3312C>T]; FBpp0305227:c.[3264C>T]; FBpp0301730:c.[3333C>T]
2L mapping	539893	SNV	1	C	G	26	100	34	CDS: FBgn0003963, CDS: FBgn0003963, CDS: FBgn0003963, CDS: FBgn0003963, CDS: FBgn0003963, Exon: Exon, Exon: Exon, Gene: FBgn0003963, Misc. feature: contig 2L_1_11 1..50000(1), mRNA: FBgn0003963, mRNA: FBgn0003963, mRNA: FBgn0003963, mRNA: FBgn0003963, mRNA: FBgn0003963	FBpp0305228:c.[3534C>G]; FBpp0077723:c.[3513C>G]; FBpp0305227:c.[3465C>G]; FBpp0302929:c.[3513C>G]; FBpp0301730:c.[3534C>G]
2L mapping	539902	SNV	1	C	T	27	100	34.2963	CDS: FBgn0003963, CDS: FBgn0003963, CDS: FBgn0003963, CDS: FBgn0003963, CDS: FBgn0003963, Exon: Exon, Exon: Exon, Gene: FBgn0003963, Misc. feature: contig 2L_1_11 1..50000(1), mRNA: FBgn0003963, mRNA: FBgn0003963, mRNA: FBgn0003963, mRNA: FBgn0003963, mRNA: FBgn0003963	FBpp0302929:c.[3522C>T]; FBpp0301730:c.[3543C>T]; FBpp0077723:c.[3522C>T]; FBpp0305228:c.[3543C>T]; FBpp0305227:c.[3474C>T]
2L mapping	539936	SNV	1	C	T	38	100	33.7895	CDS: FBgn0003963, CDS: FBgn0003963, CDS: FBgn0003963, CDS: FBgn0003963, CDS: FBgn0003963, Exon: Exon, Exon: Exon, Gene: FBgn0003963, Misc. feature: contig 2L_1_11 1..50000(1), mRNA: FBgn0003963, mRNA: FBgn0003963, mRNA: FBgn0003963, mRNA: FBgn0003963, mRNA: FBgn0003963	FBpp0305227:c.[3508C>T]; FBpp0302929:c.[3556C>T]; FBpp0305228:c.[3577C>T]; FBpp0301730:c.[3577C>T]; FBpp0077723:c.[3556C>T]
2L mapping	540097	SNV	1	C	A	37	100	34.1351	Exon: Exon, Exon: Exon, Gene: FBgn0003963, Misc. feature: contig 2L_1_11 1..50000(1), mRNA: FBgn0003963, mRNA: FBgn0003963, mRNA: FBgn0003963, mRNA: FBgn0003963, mRNA: FBgn0003963
2L mapping	540119	SNV	1	A	G	38	100	34.7895	Exon: Exon, Exon: Exon, Gene: FBgn0003963, Misc. feature: contig 2L_1_11 1..50000(1), mRNA: FBgn0003963, mRNA: FBgn0003963, mRNA: FBgn0003963, mRNA: FBgn0003963, mRNA: FBgn0003963
[truncated: 670,377+ more rows]
