# Supplementary material for: A genome engineering resource to uncover principles of cellular organization and tissue architecture by lipid signaling
Source: eLife. 2020 Dec 15;9:e55793. doi: 10.7554/eLife.55793 (PMC7771963; doi:10.7554/eLife.55793)
Supplement: Supplementary file 4. — The table shows chromosome location wise comparison between the S2R+ cells with the reference genome. Average coverage for each sequence suggests the number of times each region has been sequenced. The frequency at which the variation is observed has been mentioned. A sequence quality of >Q30 score, which corresponds to >99.9% accuracy has been obtained. Each variation has been mapped based on genomic annotation of coding vs non-coding region. If variation in the coding region leads to amino-acid changes, it has been tabulated. [file elife-55793-supp4.xlsx]

## Sheet: 2D-adapter-12_R2 trimmed ma...
Mapping	Reference Position	Type	Length	Reference	Allele	Coverage	Frequency	Average quality	Overlapping annotations	Coding region change	Amino acid change
2L mapping	5092	SNV	1	C	T	14	100	33.9286	Misc. feature: contig 2L_1_1 1..50000(1)
2L mapping	5095	SNV	1	T	A	14	100	35.2857	Misc. feature: contig 2L_1_1 1..50000(1)
2L mapping	5659	Deletion	1	A	-	22	86.3636	35.1053	Misc. feature: contig 2L_1_1 1..50000(1)
2L mapping	5661	SNV	1	C	T	20	95	32.9474	Misc. feature: contig 2L_1_1 1..50000(1)
2L mapping	5664	Deletion	1	A	-	20	95	32.5789	Misc. feature: contig 2L_1_1 1..50000(1)
2L mapping	5776	SNV	1	C	G	20	100	34.95	Misc. feature: contig 2L_1_1 1..50000(1)
2L mapping	6313	SNV	1	G	A	16	100	35.0625	Misc. feature: contig 2L_1_1 1..50000(1)
2L mapping	6353	SNV	1	C	T	14	100	36.4286	Misc. feature: contig 2L_1_1 1..50000(1)
2L mapping	6631	SNV	1	A	G	31	100	34.3226	Misc. feature: contig 2L_1_1 1..50000(1)
2L mapping	6921	SNV	1	G	T	25	100	35.64	Misc. feature: contig 2L_1_1 1..50000(1)
2L mapping	7542	SNV	1	G	T	24	100	35.2917	Exon: Exon, Gene: FBgn0031208, Misc. feature: contig 2L_1_1 1..50000(1), mRNA: FBgn0031208, mRNA: FBgn0031208, mRNA: FBgn0031208
2L mapping	9998	SNV	1	A	C	35	100	33.2571	Exon: Exon, Exon: Exon, Gene: FBgn0002121, Misc. feature: contig 2L_1_1 1..50000(1), mRNA: FBgn0002121, mRNA: FBgn0002121, mRNA: FBgn0002121, mRNA: FBgn0002121, mRNA: FBgn0002121, mRNA: FBgn0002121, mRNA: FBgn0002121, mRNA: FBgn0002121, mRNA: FBgn0002121, mRNA: FBgn0002121, mRNA: FBgn0002121
2L mapping	10610	SNV	1	G	T	27	100	33.963	Exon: Exon, Exon: Exon, Gene: FBgn0002121, Misc. feature: contig 2L_1_1 1..50000(1), mRNA: FBgn0002121, mRNA: FBgn0002121, mRNA: FBgn0002121, mRNA: FBgn0002121, mRNA: FBgn0002121, mRNA: FBgn0002121, mRNA: FBgn0002121, mRNA: FBgn0002121, mRNA: FBgn0002121, mRNA: FBgn0002121, mRNA: FBgn0002121
2L mapping	10745	SNV	1	T	A	34	100	34.5588	Exon: Exon, Exon: Exon, Gene: FBgn0002121, Misc. feature: contig 2L_1_1 1..50000(1), mRNA: FBgn0002121, mRNA: FBgn0002121, mRNA: FBgn0002121, mRNA: FBgn0002121, mRNA: FBgn0002121, mRNA: FBgn0002121, mRNA: FBgn0002121, mRNA: FBgn0002121, mRNA: FBgn0002121, mRNA: FBgn0002121, mRNA: FBgn0002121
2L mapping	11354	Deletion	1	A	-	30	83.3333	31.96	Gene: FBgn0002121, Misc. feature: contig 2L_1_1 1..50000(1)	FBpp0077824:c.[3333-10delT]; FBpp0303505:c.[3248-10delT]; FBpp0297545:c.[3357-10delT]; FBpp0077827:c.[3210-10delT]; FBpp0297546:c.[3357-10delT]; FBpp0077825:c.[3210-10delT]; FBpp0077826:c.[3210-10delT]; FBpp0077828:c.[3357-10delT]; FBpp0077829:c.[3357-10delT]; FBpp0297547:c.[3357-10delT]; FBpp0297544:c.[3357-10delT]
2L mapping	13247	SNV	1	C	T	31	100	35	Gene: FBgn0002121, Misc. feature: contig 2L_1_1 1..50000(1)	FBpp0077827:c.[2014+273G>A]; FBpp0297544:c.[2161+273G>A]; FBpp0077828:c.[2161+273G>A]; FBpp0077829:c.[2161+273G>A]; FBpp0297546:c.[2161+273G>A]; FBpp0077826:c.[2014+273G>A]; FBpp0297545:c.[2161+273G>A]; FBpp0297547:c.[2161+273G>A]; FBpp0303505:c.[2161+273G>A]; FBpp0077824:c.[2137+273G>A]; FBpp0077825:c.[2014+273G>A]
2L mapping	13465	Deletion	3	TTT	-	28	60.7143	35.7059	Gene: FBgn0002121, Misc. feature: contig 2L_1_1 1..50000(1)	FBpp0297544:c.[2161+53_2161+55delAAA]; FBpp0077826:c.[2014+53_2014+55delAAA]; FBpp0303505:c.[2161+53_2161+55delAAA]; FBpp0077829:c.[2161+53_2161+55delAAA]; FBpp0077827:c.[2014+53_2014+55delAAA]; FBpp0297546:c.[2161+53_2161+55delAAA]; FBpp0077824:c.[2137+53_2137+55delAAA]; FBpp0297545:c.[2161+53_2161+55delAAA]; FBpp0297547:c.[2161+53_2161+55delAAA]; FBpp0077825:c.[2014+53_2014+55delAAA]; FBpp00778…
2L mapping	13638	SNV	1	G	A	21	100	36.8095	Gene: FBgn0002121, Misc. feature: contig 2L_1_1 1..50000(1)	FBpp0077827:c.[1909-13C>T]; FBpp0077825:c.[1909-13C>T]; FBpp0077824:c.[2032-13C>T]; FBpp0297545:c.[2056-13C>T]; FBpp0303505:c.[2056-13C>T]; FBpp0297544:c.[2056-13C>T]; FBpp0297546:c.[2056-13C>T]; FBpp0077828:c.[2056-13C>T]; FBpp0077829:c.[2056-13C>T]; FBpp0297547:c.[2056-13C>T]; FBpp0077826:c.[1909-13C>T]
2L mapping	15752	SNV	1	C	A	24	100	35.5	Gene: FBgn0002121, Misc. feature: contig 2L_1_1 1..50000(1)	FBpp0077828:c.[85-41G>T]; FBpp0297544:c.[85-41G>T]; FBpp0297545:c.[85-41G>T]; FBpp0077824:c.[61-41G>T]; FBpp0303505:c.[85-41G>T]; FBpp0077829:c.[85-41G>T]; FBpp0297547:c.[85-41G>T]; FBpp0297546:c.[85-41G>T]
2L mapping	15806	SNV	1	T	C	32	100	34.0312	Gene: FBgn0002121, Misc. feature: contig 2L_1_1 1..50000(1)	FBpp0297547:c.[85-95A>G]; FBpp0297546:c.[85-95A>G]; FBpp0077824:c.[61-95A>G]; FBpp0297545:c.[85-95A>G]; FBpp0077828:c.[85-95A>G]; FBpp0297544:c.[85-95A>G]; FBpp0303505:c.[85-95A>G]; FBpp0077829:c.[85-95A>G]
2L mapping	16149	SNV	1	A	T	39	100	35.5897	Gene: FBgn0002121, Misc. feature: contig 2L_1_1 1..50000(1)	FBpp0303505:c.[85-438T>A]; FBpp0297545:c.[85-438T>A]; FBpp0297544:c.[85-438T>A]; FBpp0297546:c.[85-438T>A]; FBpp0077824:c.[61-438T>A]; FBpp0077829:c.[85-438T>A]; FBpp0297547:c.[85-438T>A]; FBpp0077828:c.[85-438T>A]
2L mapping	16334	SNV	1	G	A	27	100	36.3333	Gene: FBgn0002121, Misc. feature: contig 2L_1_1 1..50000(1)	FBpp0297544:c.[85-623C>T]; FBpp0297547:c.[85-623C>T]; FBpp0297546:c.[85-623C>T]; FBpp0077824:c.[61-623C>T]; FBpp0297545:c.[85-623C>T]; FBpp0077828:c.[85-623C>T]; FBpp0303505:c.[85-623C>T]; FBpp0077829:c.[85-623C>T]
2L mapping	16467	SNV	1	G	A	32	100	35.75	Gene: FBgn0002121, Misc. feature: contig 2L_1_1 1..50000(1)	FBpp0297547:c.[84+586C>T]; FBpp0297544:c.[84+586C>T]; FBpp0297545:c.[84+586C>T]; FBpp0077829:c.[84+586C>T]; FBpp0297546:c.[84+586C>T]; FBpp0077824:c.[61-756C>T]; FBpp0077828:c.[84+586C>T]; FBpp0303505:c.[84+586C>T]
2L mapping	17005	Insertion	1	-	A	23	52.1739	35.0833	Gene: FBgn0002121, Misc. feature: contig 2L_1_1 1..50000(1)	FBpp0297546:c.[84+48_84+49insT]; FBpp0077829:c.[84+48_84+49insT]; FBpp0077828:c.[84+48_84+49insT]; FBpp0077824:c.[61-1294_61-1293insT]; FBpp0297547:c.[84+48_84+49insT]; FBpp0297545:c.[84+48_84+49insT]; FBpp0303505:c.[84+48_84+49insT]; FBpp0297544:c.[84+48_84+49insT]
2L mapping	17131	SNV	1	T	G	19	100	35.2632	CDS: FBgn0002121, CDS: FBgn0002121, CDS: FBgn0002121, CDS: FBgn0002121, CDS: FBgn0002121, CDS: FBgn0002121, CDS: FBgn0002121, Exon: Exon, Gene: FBgn0002121, Misc. feature: contig 2L_1_1 1..50000(1), mRNA: FBgn0002121, mRNA: FBgn0002121, mRNA: FBgn0002121, mRNA: FBgn0002121, mRNA: FBgn0002121, mRNA: FBgn0002121, mRNA: FBgn0002121	FBpp0077824:c.[61-1420A>C]; FBpp0297546:c.[6A>C]; FBpp0297547:c.[6A>C]; FBpp0297545:c.[6A>C]; FBpp0303505:c.[6A>C]; FBpp0297544:c.[6A>C]; FBpp0077828:c.[6A>C]; FBpp0077829:c.[6A>C]	FBpp0297546:p.[Leu2Phe]; FBpp0297547:p.[Leu2Phe]; FBpp0297545:p.[Leu2Phe]; FBpp0303505:p.[Leu2Phe]; FBpp0297544:p.[Leu2Phe]; FBpp0077828:p.[Leu2Phe]; FBpp0077829:p.[Leu2Phe]
2L mapping	17441	SNV	1	A	G	24	100	36.8333	Gene: FBgn0002121, Misc. feature: contig 2L_1_1 1..50000(1)	FBpp0077824:c.61-1730T>C
2L mapping	17582	SNV	1	G	C	27	100	33.4444	Gene: FBgn0002121, Misc. feature: contig 2L_1_1 1..50000(1)	FBpp0077824:c.61-1871C>G
2L mapping	19528	Deletion	3	AGA	-	17	88.2353	36.0667	Gene: FBgn0002121, Misc. feature: contig 2L_1_1 1..50000(1)	FBpp0077824:c.60+355_60+357delTCT
2L mapping	19836	Deletion	1	A	-	16	68.75	31	Gene: FBgn0002121, Misc. feature: contig 2L_1_1 1..50000(1)	FBpp0077824:c.60+49delT
2L mapping	20242	SNV	1	A	G	18	100	34.9444	Gene: FBgn0002121, Misc. feature: contig 2L_1_1 1..50000(1)
2L mapping	20615	SNV	1	C	T	42	42.8571	36.3333	Gene: FBgn0002121, Misc. feature: contig 2L_1_1 1..50000(1)
2L mapping	21540	Insertion	3	-	ATA	27	66.6667	35.6852	Misc. feature: contig 2L_1_1 1..50000(1)
2L mapping	25741	SNV	1	T	C	52	40.3846	35.5238	Exon: Exon, Gene: FBgn0051973, Misc. feature: contig 2L_1_1 1..50000(1), mRNA: FBgn0051973, mRNA: FBgn0051973, mRNA: FBgn0051973, mRNA: FBgn0051973, mRNA: FBgn0051973, mRNA: FBgn0051973, mRNA: FBgn0051973, mRNA: FBgn0051973
2L mapping	26707	Deletion	1	T	-	25	80	34.85	Gene: FBgn0051973, Misc. feature: contig 2L_1_1 1..50000(1)	FBpp0112328:c.[2956-19delA]; FBpp0301167:c.[5386-19delA]; FBpp0301165:c.[5206-19delA]; FBpp0301166:c.[2509-19delA]; FBpp0077822:c.[5830-19delA]; FBpp0301168:c.[5506-19delA]; FBpp0077821:c.[2953-19delA]; FBpp0301164:c.[4522-19delA]
2L mapping	28813	SNV	1	A	G	25	100	33.96	CDS: FBgn0051973, CDS: FBgn0051973, CDS: FBgn0051973, CDS: FBgn0051973, CDS: FBgn0051973, CDS: FBgn0051973, CDS: FBgn0051973, CDS: FBgn0051973, Exon: Exon, Gene: FBgn0051973, Misc. feature: contig 2L_1_1 1..50000(1), mRNA: FBgn0051973, mRNA: FBgn0051973, mRNA: FBgn0051973, mRNA: FBgn0051973, mRNA: FBgn0051973, mRNA: FBgn0051973, mRNA: FBgn0051973, mRNA: FBgn0051973	FBpp0077821:c.[2009T>C]; FBpp0301168:c.[4562T>C]; FBpp0301167:c.[4442T>C]; FBpp0301164:c.[3578T>C]; FBpp0301165:c.[4262T>C]; FBpp0077822:c.[4886T>C]; FBpp0112328:c.[2009T>C]; FBpp0301166:c.[1565T>C]	FBpp0077821:p.[Met670Thr]; FBpp0301168:p.[Met1521Thr]; FBpp0301167:p.[Met1481Thr]; FBpp0301164:p.[Met1193Thr]; FBpp0301165:p.[Met1421Thr]; FBpp0077822:p.[Met1629Thr]; FBpp0112328:p.[Met670Thr]; FBpp0301166:p.[Met522Thr]
2L mapping	29147	SNV	1	T	A	26	100	33.8462	Gene: FBgn0051973, Misc. feature: contig 2L_1_1 1..50000(1)	FBpp0112328:c.[1809-79A>T]; FBpp0077822:c.[4686-79A>T]; FBpp0301166:c.[1365-79A>T]; FBpp0301167:c.[4242-79A>T]; FBpp0301164:c.[3378-79A>T]; FBpp0077821:c.[1809-79A>T]; FBpp0301165:c.[4062-79A>T]; FBpp0301168:c.[4362-79A>T]
2L mapping	30727	SNV	1	A	T	18	100	35.7222	CDS: FBgn0051973, CDS: FBgn0051973, Exon: Exon, Gene: FBgn0051973, Misc. feature: contig 2L_1_1 1..50000(1), mRNA: FBgn0051973, mRNA: FBgn0051973	FBpp0301166:c.[1365-1659T>A]; FBpp0112328:c.[1809-1659T>A]; FBpp0301167:c.[3908T>A]; FBpp0077821:c.[1809-1659T>A]; FBpp0301168:c.[4362-1659T>A]; FBpp0077822:c.[4352T>A]; FBpp0301165:c.[4062-1659T>A]; FBpp0301164:c.[3378-1659T>A]	FBpp0301167:p.[Leu1303His]; FBpp0077822:p.[Leu1451His]
2L mapping	32476	SNV	1	C	T	20	100	34.7	CDS: FBgn0051973, CDS: FBgn0051973, Exon: Exon, Gene: FBgn0051973, Misc. feature: contig 2L_1_1 1..50000(1), mRNA: FBgn0051973, mRNA: FBgn0051973	FBpp0301164:c.[3377+3270G>A]; FBpp0301166:c.[1364+2082G>A]; FBpp0301168:c.[4361+1369G>A]; FBpp0301167:c.[2159G>A]; FBpp0112328:c.[1808+1369G>A]; FBpp0077821:c.[1808+1369G>A]; FBpp0301165:c.[4061+1369G>A]; FBpp0077822:c.[2603G>A]	FBpp0301167:p.[Ser720Asn]; FBpp0077822:p.[Ser868Asn]
2L mapping	35460	SNV	1	C	T	21	100	34.1429	Gene: FBgn0051973, Misc. feature: contig 2L_1_1 1..50000(1)	FBpp0077821:c.[825-248G>A]; FBpp0077822:c.[825-248G>A]; FBpp0301165:c.[3377+286G>A]; FBpp0301167:c.[825-248G>A]; FBpp0112328:c.[825-248G>A]; FBpp0301166:c.[825-248G>A]; FBpp0301164:c.[3377+286G>A]; FBpp0301168:c.[3378-248G>A]
2L mapping	36330	SNV	1	A	T	27	100	35.5556	CDS: FBgn0051973, CDS: FBgn0051973, CDS: FBgn0051973, Exon: Exon, Gene: FBgn0051973, Misc. feature: contig 2L_1_1 1..50000(1), mRNA: FBgn0051973, mRNA: FBgn0051973, mRNA: FBgn0051973	FBpp0301168:c.[2793T>A]; FBpp0301164:c.[2793T>A]; FBpp0301166:c.[825-1118T>A]; FBpp0301167:c.[825-1118T>A]; FBpp0077822:c.[825-1118T>A]; FBpp0077821:c.[825-1118T>A]; FBpp0301165:c.[2793T>A]; FBpp0112328:c.[825-1118T>A]	FBpp0301168:p.[Asp931Glu]; FBpp0301164:p.[Asp931Glu]; FBpp0301165:p.[Asp931Glu]
2L mapping	36696	SNV	1	A	C	20	100	35.9	CDS: FBgn0051973, CDS: FBgn0051973, CDS: FBgn0051973, Exon: Exon, Gene: FBgn0051973, Misc. feature: contig 2L_1_1 1..50000(1), mRNA: FBgn0051973, mRNA: FBgn0051973, mRNA: FBgn0051973	FBpp0301166:c.[825-1484T>G]; FBpp0077822:c.[825-1484T>G]; FBpp0301165:c.[2427T>G]; FBpp0301167:c.[825-1484T>G]; FBpp0301168:c.[2427T>G]; FBpp0077821:c.[825-1484T>G]; FBpp0112328:c.[825-1484T>G]; FBpp0301164:c.[2427T>G]	FBpp0301165:p.[Asp809Glu]; FBpp0301168:p.[Asp809Glu]; FBpp0301164:p.[Asp809Glu]
2L mapping	39100	Deletion	1	T	-	29	89.6552	34.1923	Gene: FBgn0051973, Misc. feature: contig 2L_1_1 1..50000(1)	FBpp0301166:c.[627+201delA]; FBpp0077822:c.[627+201delA]; FBpp0301168:c.[627+201delA]; FBpp0112328:c.[627+201delA]; FBpp0301165:c.[627+201delA]; FBpp0301164:c.[627+201delA]; FBpp0301167:c.[627+201delA]; FBpp0077821:c.[627+201delA]
2L mapping	39132	Deletion	1	T	-	25	88	29.7273	Gene: FBgn0051973, Misc. feature: contig 2L_1_1 1..50000(1)	FBpp0077821:c.[627+169delA]; FBpp0301166:c.[627+169delA]; FBpp0301165:c.[627+169delA]; FBpp0112328:c.[627+169delA]; FBpp0301164:c.[627+169delA]; FBpp0077822:c.[627+169delA]; FBpp0301167:c.[627+169delA]; FBpp0301168:c.[627+169delA]
2L mapping	39397	SNV	1	A	C	24	100	34.75	CDS: FBgn0051973, CDS: FBgn0051973, CDS: FBgn0051973, CDS: FBgn0051973, CDS: FBgn0051973, CDS: FBgn0051973, CDS: FBgn0051973, CDS: FBgn0051973, Exon: Exon, Gene: FBgn0051973, Misc. feature: contig 2L_1_1 1..50000(1), mRNA: FBgn0051973, mRNA: FBgn0051973, mRNA: FBgn0051973, mRNA: FBgn0051973, mRNA: FBgn0051973, mRNA: FBgn0051973, mRNA: FBgn0051973, mRNA: FBgn0051973	FBpp0301166:c.[531T>G]; FBpp0301165:c.[531T>G]; FBpp0301167:c.[531T>G]; FBpp0077821:c.[531T>G]; FBpp0301164:c.[531T>G]; FBpp0077822:c.[531T>G]; FBpp0301168:c.[531T>G]; FBpp0112328:c.[531T>G]
2L mapping	39993	SNV	1	G	T	28	100	36.8571	Gene: FBgn0051973, Misc. feature: contig 2L_1_1 1..50000(1)	FBpp0077822:c.[71-136C>A]; FBpp0077821:c.[71-136C>A]; FBpp0301166:c.[71-136C>A]; FBpp0301164:c.[71-136C>A]; FBpp0301168:c.[71-136C>A]; FBpp0112328:c.[71-136C>A]; FBpp0301167:c.[71-136C>A]; FBpp0301165:c.[71-136C>A]
2L mapping	40067	SNV	1	G	C	30	100	34.1667	Gene: FBgn0051973, Misc. feature: contig 2L_1_1 1..50000(1)	FBpp0112328:c.[71-210C>G]; FBpp0301167:c.[71-210C>G]; FBpp0077821:c.[71-210C>G]; FBpp0301168:c.[71-210C>G]; FBpp0301164:c.[71-210C>G]; FBpp0301166:c.[71-210C>G]; FBpp0301165:c.[71-210C>G]; FBpp0077822:c.[71-210C>G]
2L mapping	40556	SNV	1	C	T	19	100	36.2632	Gene: FBgn0051973, Misc. feature: contig 2L_1_1 1..50000(1)	FBpp0301166:c.[71-699G>A]; FBpp0301165:c.[71-699G>A]; FBpp0301164:c.[71-699G>A]; FBpp0077822:c.[71-699G>A]; FBpp0077821:c.[71-699G>A]; FBpp0301167:c.[71-699G>A]; FBpp0301168:c.[71-699G>A]; FBpp0112328:c.[71-699G>A]
2L mapping	40750	SNV	1	C	T	33	100	33.303	Gene: FBgn0051973, Misc. feature: contig 2L_1_1 1..50000(1)	FBpp0301167:c.[71-893G>A]; FBpp0077821:c.[71-893G>A]; FBpp0077822:c.[71-893G>A]; FBpp0301165:c.[71-893G>A]; FBpp0112328:c.[71-893G>A]; FBpp0301168:c.[71-893G>A]; FBpp0301166:c.[71-893G>A]; FBpp0301164:c.[71-893G>A]
2L mapping	40829	SNV	1	A	G	31	100	35.7742	Gene: FBgn0051973, Misc. feature: contig 2L_1_1 1..50000(1)	FBpp0077821:c.[71-972T>C]; FBpp0112328:c.[71-972T>C]; FBpp0301164:c.[71-972T>C]; FBpp0301166:c.[71-972T>C]; FBpp0301167:c.[71-972T>C]; FBpp0301168:c.[71-972T>C]; FBpp0301165:c.[71-972T>C]; FBpp0077822:c.[71-972T>C]
2L mapping	40852	SNV	1	T	C	25	100	35.88	Gene: FBgn0051973, Misc. feature: contig 2L_1_1 1..50000(1)	FBpp0077822:c.[71-995A>G]; FBpp0301168:c.[71-995A>G]; FBpp0301166:c.[71-995A>G]; FBpp0112328:c.[71-995A>G]; FBpp0077821:c.[71-995A>G]; FBpp0301164:c.[71-995A>G]; FBpp0301165:c.[71-995A>G]; FBpp0301167:c.[71-995A>G]
2L mapping	41405	SNV	1	T	A	28	100	35.8214	Gene: FBgn0051973, Misc. feature: contig 2L_1_1 1..50000(1)	FBpp0112328:c.[71-1548A>T]; FBpp0301165:c.[71-1548A>T]; FBpp0077822:c.[71-1548A>T]; FBpp0301168:c.[71-1548A>T]; FBpp0301164:c.[71-1548A>T]; FBpp0301166:c.[71-1548A>T]; FBpp0077821:c.[71-1548A>T]; FBpp0301167:c.[71-1548A>T]
2L mapping	41882	Insertion	1	-	C	23	82.6087	33.4211	Gene: FBgn0051973, Misc. feature: contig 2L_1_1 1..50000(1)	FBpp0112328:c.[71-2025_71-2024insG]; FBpp0301168:c.[71-2025_71-2024insG]; FBpp0301164:c.[71-2025_71-2024insG]; FBpp0301165:c.[71-2025_71-2024insG]; FBpp0077821:c.[71-2025_71-2024insG]; FBpp0077822:c.[71-2025_71-2024insG]; FBpp0301167:c.[71-2025_71-2024insG]; FBpp0301166:c.[71-2025_71-2024insG]
2L mapping	42012	SNV	1	T	G	30	100	36.1	Gene: FBgn0051973, Misc. feature: contig 2L_1_1 1..50000(1)	FBpp0301166:c.[71-2155A>C]; FBpp0301167:c.[71-2155A>C]; FBpp0301164:c.[71-2155A>C]; FBpp0077822:c.[71-2155A>C]; FBpp0077821:c.[71-2155A>C]; FBpp0301168:c.[71-2155A>C]; FBpp0112328:c.[71-2155A>C]; FBpp0301165:c.[71-2155A>C]
2L mapping	42186	SNV	1	C	G	17	100	33.5294	Gene: FBgn0051973, Misc. feature: contig 2L_1_1 1..50000(1)	FBpp0301168:c.[71-2329G>C]; FBpp0301164:c.[71-2329G>C]; FBpp0077821:c.[71-2329G>C]; FBpp0112328:c.[71-2329G>C]; FBpp0301165:c.[71-2329G>C]; FBpp0301167:c.[71-2329G>C]; FBpp0077822:c.[71-2329G>C]; FBpp0301166:c.[71-2329G>C]
2L mapping	42385	Insertion	5	-	TCGCC	26	84.6154	35.8909	Gene: FBgn0051973, Misc. feature: contig 2L_1_1 1..50000(1)	FBpp0077821:c.[71-2528_71-2527insGGCGA]; FBpp0301165:c.[71-2528_71-2527insGGCGA]; FBpp0112328:c.[71-2528_71-2527insGGCGA]; FBpp0301167:c.[71-2528_71-2527insGGCGA]; FBpp0301164:c.[71-2528_71-2527insGGCGA]; FBpp0301166:c.[71-2528_71-2527insGGCGA]; FBpp0077822:c.[71-2528_71-2527insGGCGA]; FBpp0301168:c.[71-2528_71-2527insGGCGA]
2L mapping	42860	SNV	1	G	A	24	100	32.9167	Gene: FBgn0051973, Misc. feature: contig 2L_1_1 1..50000(1)	FBpp0077822:c.[71-3003C>T]; FBpp0301168:c.[71-3003C>T]; FBpp0112328:c.[71-3003C>T]; FBpp0301165:c.[71-3003C>T]; FBpp0077821:c.[71-3003C>T]; FBpp0301167:c.[71-3003C>T]; FBpp0301164:c.[71-3003C>T]; FBpp0301166:c.[71-3003C>T]
2L mapping	42877	Insertion	1	-	C	17	82.3529	34.5	Gene: FBgn0051973, Misc. feature: contig 2L_1_1 1..50000(1)	FBpp0301165:c.[71-3020_71-3019insG]; FBpp0301167:c.[71-3020_71-3019insG]; FBpp0077822:c.[71-3020_71-3019insG]; FBpp0301164:c.[71-3020_71-3019insG]; FBpp0112328:c.[71-3020_71-3019insG]; FBpp0301168:c.[71-3020_71-3019insG]; FBpp0301166:c.[71-3020_71-3019insG]; FBpp0077821:c.[71-3020_71-3019insG]
2L mapping	43105	SNV	1	G	T	21	100	37	Gene: FBgn0051973, Misc. feature: contig 2L_1_1 1..50000(1)	FBpp0301168:c.[71-3248C>A]; FBpp0077821:c.[71-3248C>A]; FBpp0301167:c.[71-3248C>A]; FBpp0301166:c.[71-3248C>A]; FBpp0301165:c.[71-3248C>A]; FBpp0077822:c.[71-3248C>A]; FBpp0301164:c.[71-3248C>A]; FBpp0112328:c.[71-3248C>A]
2L mapping	43241	SNV	1	A	G	25	100	35.52	Gene: FBgn0051973, Misc. feature: contig 2L_1_1 1..50000(1)	FBpp0301165:c.[71-3384T>C]; FBpp0077822:c.[71-3384T>C]; FBpp0077821:c.[71-3384T>C]; FBpp0301164:c.[71-3384T>C]; FBpp0301167:c.[71-3384T>C]; FBpp0112328:c.[71-3384T>C]; FBpp0301166:c.[71-3384T>C]; FBpp0301168:c.[71-3384T>C]
2L mapping	43265	SNV	1	A	G	15	100	35.4667	Gene: FBgn0051973, Misc. feature: contig 2L_1_1 1..50000(1)	FBpp0301165:c.[71-3408T>C]; FBpp0077821:c.[71-3408T>C]; FBpp0301166:c.[71-3408T>C]; FBpp0112328:c.[71-3408T>C]; FBpp0301167:c.[71-3408T>C]; FBpp0077822:c.[71-3408T>C]; FBpp0301164:c.[71-3408T>C]; FBpp0301168:c.[71-3408T>C]
2L mapping	43548	SNV	1	C	T	29	100	33.3103	Gene: FBgn0051973, Misc. feature: contig 2L_1_1 1..50000(1)	FBpp0077822:c.[71-3691G>A]; FBpp0301168:c.[71-3691G>A]; FBpp0301164:c.[71-3691G>A]; FBpp0077821:c.[71-3691G>A]; FBpp0301166:c.[71-3691G>A]; FBpp0301167:c.[71-3691G>A]; FBpp0112328:c.[71-3691G>A]; FBpp0301165:c.[71-3691G>A]
2L mapping	43751	SNV	1	C	A	27	100	35.2593	Gene: FBgn0051973, Misc. feature: contig 2L_1_1 1..50000(1)	FBpp0301167:c.[71-3894G>T]; FBpp0077821:c.[71-3894G>T]; FBpp0301168:c.[71-3894G>T]; FBpp0301166:c.[71-3894G>T]; FBpp0301165:c.[71-3894G>T]; FBpp0077822:c.[71-3894G>T]; FBpp0112328:c.[71-3894G>T]; FBpp0301164:c.[71-3894G>T]
2L mapping	44434	Insertion	1	-	T	34	91.1765	36.2903	Gene: FBgn0051973, Misc. feature: contig 2L_1_1 1..50000(1)	FBpp0301165:c.[71-4577_71-4576insA]; FBpp0301167:c.[71-4577_71-4576insA]; FBpp0077821:c.[71-4577_71-4576insA]; FBpp0112328:c.[71-4577_71-4576insA]; FBpp0301166:c.[71-4577_71-4576insA]; FBpp0077822:c.[71-4577_71-4576insA]; FBpp0301164:c.[71-4577_71-4576insA]; FBpp0301168:c.[71-4577_71-4576insA]
2L mapping	44679	SNV	1	A	T	28	100	35.8929	Gene: FBgn0051973, Misc. feature: contig 2L_1_1 1..50000(1)	FBpp0077821:c.[71-4822T>A]; FBpp0301166:c.[71-4822T>A]; FBpp0301168:c.[71-4822T>A]; FBpp0301167:c.[71-4822T>A]; FBpp0301164:c.[71-4822T>A]; FBpp0077822:c.[71-4822T>A]; FBpp0301165:c.[71-4822T>A]; FBpp0112328:c.[71-4822T>A]
2L mapping	45282	Insertion	3	-	GTG	23	86.9565	35.1833	Gene: FBgn0051973, Misc. feature: contig 2L_1_1 1..50000(1)	FBpp0301168:c.[71-5425_71-5424insCAC]; FBpp0112328:c.[71-5425_71-5424insCAC]; FBpp0077822:c.[71-5425_71-5424insCAC]; FBpp0301166:c.[71-5425_71-5424insCAC]; FBpp0301167:c.[71-5425_71-5424insCAC]; FBpp0301164:c.[71-5425_71-5424insCAC]; FBpp0077821:c.[71-5425_71-5424insCAC]; FBpp0301165:c.[71-5425_71-5424insCAC]
2L mapping	45770	SNV	1	T	A	15	93.3333	36	Gene: FBgn0051973, Misc. feature: contig 2L_1_1 1..50000(1)	FBpp0077822:c.[71-5913A>T]; FBpp0077821:c.[71-5913A>T]; FBpp0301168:c.[71-5913A>T]; FBpp0301167:c.[71-5913A>T]; FBpp0301165:c.[71-5913A>T]; FBpp0112328:c.[71-5913A>T]; FBpp0301164:c.[71-5913A>T]; FBpp0301166:c.[71-5913A>T]
2L mapping	46105	SNV	1	G	A	64	46.875	35.1667	Gene: FBgn0051973, Misc. feature: contig 2L_1_1 1..50000(1)	FBpp0077821:c.[71-6248C>T]; FBpp0112328:c.[71-6248C>T]; FBpp0301165:c.[71-6248C>T]; FBpp0301166:c.[71-6248C>T]; FBpp0077822:c.[71-6248C>T]; FBpp0301164:c.[71-6248C>T]; FBpp0301168:c.[71-6248C>T]; FBpp0301167:c.[71-6248C>T]
2L mapping	46149	SNV	1	A	G	56	51.7857	36.4483	Gene: FBgn0051973, Misc. feature: contig 2L_1_1 1..50000(1)	FBpp0112328:c.[71-6292T>C]; FBpp0301164:c.[71-6292T>C]; FBpp0077822:c.[71-6292T>C]; FBpp0301168:c.[71-6292T>C]; FBpp0301166:c.[71-6292T>C]; FBpp0077821:c.[71-6292T>C]; FBpp0301167:c.[71-6292T>C]; FBpp0301165:c.[71-6292T>C]
2L mapping	46404	Insertion	1	-	A	45	62.2222	35.9286	Gene: FBgn0051973, Misc. feature: contig 2L_1_1 1..50000(1)	FBpp0301167:c.[71-6547_71-6546insT]; FBpp0077821:c.[71-6547_71-6546insT]; FBpp0112328:c.[71-6547_71-6546insT]; FBpp0301164:c.[71-6547_71-6546insT]; FBpp0301165:c.[71-6547_71-6546insT]; FBpp0301168:c.[71-6547_71-6546insT]; FBpp0301166:c.[71-6547_71-6546insT]; FBpp0077822:c.[71-6547_71-6546insT]
2L mapping	46954	SNV	1	T	C	54	100	35.1852	Gene: FBgn0051973, Misc. feature: contig 2L_1_1 1..50000(1)	FBpp0301166:c.[71-7097A>G]; FBpp0077821:c.[71-7097A>G]; FBpp0301168:c.[71-7097A>G]; FBpp0301167:c.[71-7097A>G]; FBpp0077822:c.[71-7097A>G]; FBpp0301164:c.[71-7097A>G]; FBpp0301165:c.[71-7097A>G]; FBpp0112328:c.[71-7097A>G]
2L mapping	47238	SNV	1	A	T	53	100	34.9811	Gene: FBgn0051973, Misc. feature: contig 2L_1_1 1..50000(1)	FBpp0301167:c.[71-7381T>A]; FBpp0301165:c.[71-7381T>A]; FBpp0301168:c.[71-7381T>A]; FBpp0112328:c.[71-7381T>A]; FBpp0301164:c.[71-7381T>A]; FBpp0077821:c.[71-7381T>A]; FBpp0301166:c.[71-7381T>A]; FBpp0077822:c.[71-7381T>A]
2L mapping	47287	SNV	1	T	A	59	100	36.1186	Gene: FBgn0051973, Misc. feature: contig 2L_1_1 1..50000(1)	FBpp0077822:c.[71-7430A>T]; FBpp0301167:c.[71-7430A>T]; FBpp0301165:c.[71-7430A>T]; FBpp0301168:c.[71-7430A>T]; FBpp0077821:c.[71-7430A>T]; FBpp0301166:c.[71-7430A>T]; FBpp0301164:c.[71-7430A>T]; FBpp0112328:c.[71-7430A>T]
2L mapping	47356	Deletion	1	T	-	65	96.9231	34.9524	Gene: FBgn0051973, Misc. feature: contig 2L_1_1 1..50000(1)	FBpp0301164:c.[71-7499delA]; FBpp0112328:c.[71-7499delA]; FBpp0077821:c.[71-7499delA]; FBpp0301166:c.[71-7499delA]; FBpp0301165:c.[71-7499delA]; FBpp0077822:c.[71-7499delA]; FBpp0301168:c.[71-7499delA]; FBpp0301167:c.[71-7499delA]
2L mapping	52553	MNV	2	AA	CG	34	58.8235	35.9	Gene: FBgn0051973, Misc. feature: contig 2L_1_2 1..50000(1)	FBpp0301167:c.[70+5527_70+5528delTTinsCG]; FBpp0301166:c.[70+5527_70+5528delTTinsCG]; FBpp0301164:c.[70+5527_70+5528delTTinsCG]; FBpp0301168:c.[70+5527_70+5528delTTinsCG]; FBpp0077822:c.[70+5527_70+5528delTTinsCG]; FBpp0077821:c.[70+5527_70+5528delTTinsCG]; FBpp0301165:c.[70+5527_70+5528delTTinsCG]; FBpp0112328:c.[70+5527_70+5528delTTinsCG]
2L mapping	52557	SNV	1	A	C	33	60.6061	34.95	Gene: FBgn0051973, Misc. feature: contig 2L_1_2 1..50000(1)	FBpp0301165:c.[70+5524T>G]; FBpp0077822:c.[70+5524T>G]; FBpp0301168:c.[70+5524T>G]; FBpp0301166:c.[70+5524T>G]; FBpp0301164:c.[70+5524T>G]; FBpp0077821:c.[70+5524T>G]; FBpp0301167:c.[70+5524T>G]; FBpp0112328:c.[70+5524T>G]
2L mapping	52559	SNV	1	A	C	33	57.5758	35.3684	Gene: FBgn0051973, Misc. feature: contig 2L_1_2 1..50000(1)	FBpp0112328:c.[70+5522T>G]; FBpp0301165:c.[70+5522T>G]; FBpp0301168:c.[70+5522T>G]; FBpp0077822:c.[70+5522T>G]; FBpp0301167:c.[70+5522T>G]; FBpp0077821:c.[70+5522T>G]; FBpp0301166:c.[70+5522T>G]; FBpp0301164:c.[70+5522T>G]
2L mapping	52632	SNV	1	T	A	48	39.5833	36.5789	Gene: FBgn0051973, Misc. feature: contig 2L_1_2 1..50000(1)	FBpp0301167:c.[70+5449A>T]; FBpp0301165:c.[70+5449A>T]; FBpp0301168:c.[70+5449A>T]; FBpp0077822:c.[70+5449A>T]; FBpp0077821:c.[70+5449A>T]; FBpp0112328:c.[70+5449A>T]; FBpp0301166:c.[70+5449A>T]; FBpp0301164:c.[70+5449A>T]
2L mapping	53642	SNV	1	T	C	24	100	35.2917	Gene: FBgn0051973, Misc. feature: contig 2L_1_2 1..50000(1)	FBpp0301166:c.[70+4439A>G]; FBpp0112328:c.[70+4439A>G]; FBpp0301164:c.[70+4439A>G]; FBpp0077822:c.[70+4439A>G]; FBpp0301165:c.[70+4439A>G]; FBpp0301167:c.[70+4439A>G]; FBpp0301168:c.[70+4439A>G]; FBpp0077821:c.[70+4439A>G]
2L mapping	54049	SNV	1	G	T	34	97.0588	33.697	Gene: FBgn0051973, Misc. feature: contig 2L_1_2 1..50000(1)	FBpp0077822:c.[70+4032C>A]; FBpp0301166:c.[70+4032C>A]; FBpp0301165:c.[70+4032C>A]; FBpp0301168:c.[70+4032C>A]; FBpp0301167:c.[70+4032C>A]; FBpp0112328:c.[70+4032C>A]; FBpp0301164:c.[70+4032C>A]; FBpp0077821:c.[70+4032C>A]
2L mapping	54273	MNV	2	AT	GA	32	100	35.7812	Gene: FBgn0051973, Misc. feature: contig 2L_1_2 1..50000(1)	FBpp0077821:c.[70+3807_70+3808delATinsTC]; FBpp0301164:c.[70+3807_70+3808delATinsTC]; FBpp0301168:c.[70+3807_70+3808delATinsTC]; FBpp0301167:c.[70+3807_70+3808delATinsTC]; FBpp0301165:c.[70+3807_70+3808delATinsTC]; FBpp0077822:c.[70+3807_70+3808delATinsTC]; FBpp0301166:c.[70+3807_70+3808delATinsTC]; FBpp0112328:c.[70+3807_70+3808delATinsTC]
2L mapping	54339	SNV	1	T	A	37	100	34.8649	Gene: FBgn0051973, Misc. feature: contig 2L_1_2 1..50000(1)	FBpp0301168:c.[70+3742A>T]; FBpp0301164:c.[70+3742A>T]; FBpp0301166:c.[70+3742A>T]; FBpp0112328:c.[70+3742A>T]; FBpp0301167:c.[70+3742A>T]; FBpp0077822:c.[70+3742A>T]; FBpp0077821:c.[70+3742A>T]; FBpp0301165:c.[70+3742A>T]
2L mapping	54570	SNV	1	G	A	41	97.561	34.25	Gene: FBgn0051973, Misc. feature: contig 2L_1_2 1..50000(1)	FBpp0301168:c.[70+3511C>T]; FBpp0301167:c.[70+3511C>T]; FBpp0301165:c.[70+3511C>T]; FBpp0077822:c.[70+3511C>T]; FBpp0112328:c.[70+3511C>T]; FBpp0301164:c.[70+3511C>T]; FBpp0077821:c.[70+3511C>T]; FBpp0301166:c.[70+3511C>T]
2L mapping	54573	SNV	1	A	G	38	100	35.6579	Gene: FBgn0051973, Misc. feature: contig 2L_1_2 1..50000(1)	FBpp0301168:c.[70+3508T>C]; FBpp0077822:c.[70+3508T>C]; FBpp0301164:c.[70+3508T>C]; FBpp0301165:c.[70+3508T>C]; FBpp0301167:c.[70+3508T>C]; FBpp0077821:c.[70+3508T>C]; FBpp0301166:c.[70+3508T>C]; FBpp0112328:c.[70+3508T>C]
2L mapping	55774	SNV	1	A	G	29	100	33.1379	Gene: FBgn0051973, Misc. feature: contig 2L_1_2 1..50000(1)	FBpp0077821:c.[70+2307T>C]; FBpp0301165:c.[70+2307T>C]; FBpp0112328:c.[70+2307T>C]; FBpp0301168:c.[70+2307T>C]; FBpp0301167:c.[70+2307T>C]; FBpp0301164:c.[70+2307T>C]; FBpp0077822:c.[70+2307T>C]; FBpp0301166:c.[70+2307T>C]
2L mapping	56423	SNV	1	C	T	25	100	33.32	Gene: FBgn0051973, Misc. feature: contig 2L_1_2 1..50000(1)	FBpp0112328:c.[70+1658G>A]; FBpp0301164:c.[70+1658G>A]; FBpp0077821:c.[70+1658G>A]; FBpp0301166:c.[70+1658G>A]; FBpp0077822:c.[70+1658G>A]; FBpp0301167:c.[70+1658G>A]; FBpp0301168:c.[70+1658G>A]; FBpp0301165:c.[70+1658G>A]
2L mapping	56855	SNV	1	G	A	22	100	35.8182	Gene: FBgn0051973, Misc. feature: contig 2L_1_2 1..50000(1)	FBpp0301164:c.[70+1226C>T]; FBpp0301168:c.[70+1226C>T]; FBpp0301166:c.[70+1226C>T]; FBpp0301165:c.[70+1226C>T]; FBpp0077822:c.[70+1226C>T]; FBpp0301167:c.[70+1226C>T]; FBpp0077821:c.[70+1226C>T]; FBpp0112328:c.[70+1226C>T]
2L mapping	57088	SNV	1	G	T	31	100	34.6774	Gene: FBgn0051973, Misc. feature: contig 2L_1_2 1..50000(1)	FBpp0077821:c.[70+993C>A]; FBpp0077822:c.[70+993C>A]; FBpp0301166:c.[70+993C>A]; FBpp0301167:c.[70+993C>A]; FBpp0112328:c.[70+993C>A]; FBpp0301165:c.[70+993C>A]; FBpp0301168:c.[70+993C>A]; FBpp0301164:c.[70+993C>A]
2L mapping	57096	SNV	1	T	C	28	100	35.8571	Gene: FBgn0051973, Misc. feature: contig 2L_1_2 1..50000(1)	FBpp0077821:c.[70+985A>G]; FBpp0077822:c.[70+985A>G]; FBpp0301165:c.[70+985A>G]; FBpp0301167:c.[70+985A>G]; FBpp0301168:c.[70+985A>G]; FBpp0301166:c.[70+985A>G]; FBpp0301164:c.[70+985A>G]; FBpp0112328:c.[70+985A>G]
2L mapping	57256	SNV	1	C	T	28	100	35.1786	Gene: FBgn0051973, Misc. feature: contig 2L_1_2 1..50000(1)	FBpp0301165:c.[70+825G>A]; FBpp0112328:c.[70+825G>A]; FBpp0077822:c.[70+825G>A]; FBpp0301167:c.[70+825G>A]; FBpp0077821:c.[70+825G>A]; FBpp0301166:c.[70+825G>A]; FBpp0301168:c.[70+825G>A]; FBpp0301164:c.[70+825G>A]
2L mapping	57571	Insertion	2	-	AT	20	45	37	Gene: FBgn0051973, Misc. feature: contig 2L_1_2 1..50000(1)	FBpp0077822:c.[70+510_70+511insAT]; FBpp0112328:c.[70+510_70+511insAT]; FBpp0301168:c.[70+510_70+511insAT]; FBpp0077821:c.[70+510_70+511insAT]; FBpp0301166:c.[70+510_70+511insAT]; FBpp0301165:c.[70+510_70+511insAT]; FBpp0301167:c.[70+510_70+511insAT]; FBpp0301164:c.[70+510_70+511insAT]
2L mapping	57810	SNV	1	A	G	24	100	32.0417	Gene: FBgn0051973, Misc. feature: contig 2L_1_2 1..50000(1)	FBpp0301167:c.[70+271T>C]; FBpp0301165:c.[70+271T>C]; FBpp0301168:c.[70+271T>C]; FBpp0112328:c.[70+271T>C]; FBpp0301166:c.[70+271T>C]; FBpp0301164:c.[70+271T>C]; FBpp0077822:c.[70+271T>C]; FBpp0077821:c.[70+271T>C]
2L mapping	58166	SNV	1	T	C	28	100	33.7857	Exon: Exon, Exon: Exon, Exon: Exon, Gene: FBgn0051973, Misc. feature: contig 2L_1_2 1..50000(1), mRNA: FBgn0051973, mRNA: FBgn0051973, mRNA: FBgn0051973, mRNA: FBgn0051973, mRNA: FBgn0051973, mRNA: FBgn0051973, mRNA: FBgn0051973, mRNA: FBgn0051973
2L mapping	59250	Insertion	1	-	G	22	100	36.4545	Exon: Exon, Exon: Exon, Gene: FBgn0051973, Misc. feature: contig 2L_1_2 1..50000(1), mRNA: FBgn0051973, mRNA: FBgn0051973, mRNA: FBgn0051973, mRNA: FBgn0051973, mRNA: FBgn0051973, mRNA: FBgn0051973, mRNA: FBgn0051973
2L mapping	59771	Deletion	2	GC	-	16	100	35.625	Gene: FBgn0051973, Misc. feature: contig 2L_1_2 1..50000(1)
2L mapping	59775	Deletion	8	ACTACTTC	-	18	88.8889	35.5	Gene: FBgn0051973, Misc. feature: contig 2L_1_2 1..50000(1)
2L mapping	60927	SNV	1	G	A	23	100	34.5652	Gene: FBgn0051973, Misc. feature: contig 2L_1_2 1..50000(1)
2L mapping	61157	SNV	1	T	A	34	100	34.3824	Gene: FBgn0051973, Misc. feature: contig 2L_1_2 1..50000(1)
2L mapping	61165	SNV	1	G	C	35	100	35.8857	Gene: FBgn0051973, Misc. feature: contig 2L_1_2 1..50000(1)
2L mapping	61604	SNV	1	G	T	29	100	33.2414	Gene: FBgn0051973, Misc. feature: contig 2L_1_2 1..50000(1)
2L mapping	61607	Insertion	1	-	A	28	92.8571	35.1923	Gene: FBgn0051973, Misc. feature: contig 2L_1_2 1..50000(1)
2L mapping	61629	SNV	1	T	C	30	100	34.8	Gene: FBgn0051973, Misc. feature: contig 2L_1_2 1..50000(1)
2L mapping	62314	SNV	1	C	T	28	100	33.1786	Gene: FBgn0051973, Misc. feature: contig 2L_1_2 1..50000(1)
2L mapping	62944	Insertion	1	-	A	22	95.4545	36.619	Gene: FBgn0051973, Misc. feature: contig 2L_1_2 1..50000(1)
2L mapping	62945	MNV	3	TGC	CAA	22	95.4545	35.5714	Gene: FBgn0051973, Misc. feature: contig 2L_1_2 1..50000(1)
2L mapping	63513	SNV	1	G	A	31	100	33.1613	Gene: FBgn0051973, Misc. feature: contig 2L_1_2 1..50000(1)
2L mapping	63575	SNV	1	A	G	27	100	33.4074	Gene: FBgn0051973, Misc. feature: contig 2L_1_2 1..50000(1)
2L mapping	64004	Deletion	1	T	-	18	55.5556	33.9	Gene: FBgn0051973, Misc. feature: contig 2L_1_2 1..50000(1)
2L mapping	64468	SNV	1	G	C	19	100	35.5789	Gene: FBgn0051973, Misc. feature: contig 2L_1_2 1..50000(1)
2L mapping	65405	SNV	1	G	T	27	100	35.6296	Misc. feature: contig 2L_1_2 1..50000(1)
2L mapping	65445	SNV	1	A	T	32	100	35.9688	Misc. feature: contig 2L_1_2 1..50000(1)
2L mapping	65518	Insertion	1	-	T	29	72.4138	34.6667	Misc. feature: contig 2L_1_2 1..50000(1)
2L mapping	67497	SNV	1	T	C	21	100	31.7143	Exon: Exon, Exon: Exon, Gene: FBgn0067779, Misc. feature: contig 2L_1_2 1..50000(1), mRNA: FBgn0067779, mRNA: FBgn0067779, mRNA: FBgn0067779, mRNA: FBgn0067779, mRNA: FBgn0067779
2L mapping	70596	SNV	1	G	A	29	100	35.9655	Gene: FBgn0067779, Misc. feature: contig 2L_1_2 1..50000(1)	FBpp0077759:c.[2736-11G>A]; FBpp0297495:c.[2736-11G>A]; FBpp0297496:c.[2736-11G>A]; FBpp0297497:c.[2736-11G>A]; FBpp0297494:c.[2736-11G>A]
2L mapping	70661	SNV	1	A	C	33	100	34.3333	CDS: FBgn0067779, CDS: FBgn0067779, CDS: FBgn0067779, CDS: FBgn0067779, CDS: FBgn0067779, Exon: Exon, Exon: Exon, Gene: FBgn0067779, Misc. feature: contig 2L_1_2 1..50000(1), mRNA: FBgn0067779, mRNA: FBgn0067779, mRNA: FBgn0067779, mRNA: FBgn0067779, mRNA: FBgn0067779	FBpp0297495:c.[2790A>C]; FBpp0297496:c.[2790A>C]; FBpp0297494:c.[2790A>C]; FBpp0297497:c.[2790A>C]; FBpp0077759:c.[2790A>C]
2L mapping	70874	SNV	1	G	A	29	100	32.6552	CDS: FBgn0067779, CDS: FBgn0067779, CDS: FBgn0067779, CDS: FBgn0067779, CDS: FBgn0067779, Exon: Exon, Exon: Exon, Gene: FBgn0067779, Misc. feature: contig 2L_1_2 1..50000(1), mRNA: FBgn0067779, mRNA: FBgn0067779, mRNA: FBgn0067779, mRNA: FBgn0067779, mRNA: FBgn0067779	FBpp0297494:c.[3003G>A]; FBpp0297496:c.[3003G>A]; FBpp0297495:c.[3003G>A]; FBpp0077759:c.[3003G>A]; FBpp0297497:c.[3003G>A]
2L mapping	70992	Deletion	9	TACAATGTA	-	33	39.3939	31.6154	Exon: Exon, Exon: Exon, Gene: FBgn0067779, Misc. feature: contig 2L_1_2 1..50000(1), mRNA: FBgn0067779, mRNA: FBgn0067779, mRNA: FBgn0067779, mRNA: FBgn0067779, mRNA: FBgn0067779
2L mapping	71942	Deletion	1	T	-	30	90	32.5185	Misc. RNA: FBgn0266322, Misc. RNA: FBgn0266322, Exon: Exon, Exon: Exon, Gene: FBgn0266322, Gene: FBgn0031213, Misc. feature: contig 2L_1_2 1..50000(1)
2L mapping	72395	SNV	1	T	G	29	96.5517	33.2857	Misc. RNA: FBgn0266322, Misc. RNA: FBgn0266322, Exon: Exon, Exon: Exon, Exon: Exon, Gene: FBgn0266322, Gene: FBgn0031213, Misc. feature: contig 2L_1_2 1..50000(1), mRNA: FBgn0031213	FBpp0297498:c.69+314T>G
2L mapping	72683	SNV	1	T	C	30	100	34.7333	Misc. RNA: FBgn0266322, Misc. RNA: FBgn0266322, CDS: FBgn0031213, Exon: Exon, Exon: Exon, Exon: Exon, Gene: FBgn0266322, Gene: FBgn0031213, Misc. feature: contig 2L_1_2 1..50000(1), mRNA: FBgn0031213	FBpp0077760:c.[81T>C]; FBpp0297498:c.[69+602T>C]
2L mapping	73869	SNV	1	A	G	31	100	35.7742	Exon: Exon, Gene: FBgn0031213, Misc. feature: contig 2L_1_2 1..50000(1), mRNA: FBgn0031213	FBpp0291374:c.[123+177A>G]; FBpp0077760:c.[375+892A>G]; FBpp0297498:c.[70-1034A>G]
2L mapping	74167	SNV	1	A	G	29	100	35.7931	Exon: Exon, Gene: FBgn0031213, Misc. feature: contig 2L_1_2 1..50000(1), mRNA: FBgn0031213	FBpp0077760:c.[376-736A>G]; FBpp0297498:c.[70-736A>G]; FBpp0291374:c.[123+475A>G]
2L mapping	76324	SNV	1	C	A	26	100	36.2308	Misc. feature: contig 2L_1_2 1..50000(1)
2L mapping	76479	SNV	1	C	T	34	100	35	CDS: FBgn0031214, Exon: Exon, Gene: FBgn0031214, Misc. feature: contig 2L_1_2 1..50000(1), mRNA: FBgn0031214	FBpp0297499:c.34C>T
2L mapping	80074	SNV	1	C	T	37	97.2973	35.3056	Misc. feature: contig 2L_1_2 1..50000(1)
2L mapping	80243	Deletion	3	TGG	-	28	92.8571	34.4615	Misc. feature: contig 2L_1_2 1..50000(1)
2L mapping	80376	SNV	1	G	T	25	100	33.48	Misc. feature: contig 2L_1_2 1..50000(1)
2L mapping	80705	SNV	1	C	G	39	100	34.3846	Misc. feature: contig 2L_1_2 1..50000(1)
2L mapping	80900	SNV	1	A	G	32	100	32.9375	Misc. feature: contig 2L_1_2 1..50000(1)
2L mapping	81825	Insertion	1	-	A	38	100	33.9737	Misc. feature: contig 2L_1_2 1..50000(1)
2L mapping	82441	SNV	1	A	T	36	100	34.4722	Exon: Exon, Gene: FBgn0002931, Misc. feature: contig 2L_1_2 1..50000(1), mRNA: FBgn0002931
2L mapping	83057	SNV	1	A	T	27	88.8889	35.5833	Exon: Exon, Exon: Exon, Gene: FBgn0002931, Misc. feature: contig 2L_1_2 1..50000(1), mRNA: FBgn0002931, mRNA: FBgn0002931
2L mapping	84418	SNV	1	A	G	24	100	35.9583	Gene: FBgn0002931, Misc. feature: contig 2L_1_2 1..50000(1)	FBpp0288762:c.[74-141T>C]; FBpp0303487:c.[74-141T>C]
2L mapping	84886	SNV	1	T	G	39	100	33.7436	Gene: FBgn0002931, Misc. feature: contig 2L_1_2 1..50000(1)	FBpp0303487:c.[74-609A>C]; FBpp0288762:c.[74-609A>C]
2L mapping	85475	SNV	1	C	G	38	100	35.7895	Gene: FBgn0002931, Misc. feature: contig 2L_1_2 1..50000(1)	FBpp0303487:c.[74-1198G>C]; FBpp0288762:c.[74-1198G>C]
2L mapping	86588	SNV	1	C	T	33	100	36.1515	Gene: FBgn0002931, Misc. feature: contig 2L_1_2 1..50000(1)	FBpp0288762:c.[73+432G>A]; FBpp0303487:c.[73+432G>A]
2L mapping	87553	SNV	1	A	G	37	100	33.4324	Misc. feature: contig 2L_1_2 1..50000(1)
2L mapping	89411	SNV	1	G	T	35	100	35.0857	Misc. feature: contig 2L_1_2 1..50000(1)
2L mapping	91143	SNV	1	G	A	38	100	35.5	Misc. feature: contig 2L_1_2 1..50000(1)
2L mapping	91698	SNV	1	A	C	35	97.1429	35.5588	Misc. feature: contig 2L_1_2 1..50000(1)
2L mapping	92895	SNV	1	T	C	31	100	34.9677	Misc. feature: contig 2L_1_2 1..50000(1)
2L mapping	93336	SNV	1	G	C	32	100	34.75	Misc. feature: contig 2L_1_2 1..50000(1)
2L mapping	93510	SNV	1	T	G	25	100	36.36	Misc. feature: contig 2L_1_2 1..50000(1)
2L mapping	93878	SNV	1	G	C	30	100	29.8	Misc. feature: contig 2L_1_2 1..50000(1)
2L mapping	94410	SNV	1	T	A	42	100	32.9762	Misc. feature: contig 2L_1_2 1..50000(1)
2L mapping	94968	Insertion	1	-	T	44	95.4545	34.9048	Gene: FBgn0031216, Misc. feature: contig 2L_1_2 1..50000(1)	FBpp0077762:c.42-22_42-21insT
2L mapping	100206	SNV	1	A	C	34	100	35.8235	CDS: FBgn0031216, Exon: Exon, Gene: FBgn0031216, Misc. feature: contig 2L_1_3 1..50000(1), mRNA: FBgn0031216	FBpp0077762:c.4979A>C	FBpp0077762:p.Lys1660Thr
2L mapping	101869	SNV	1	C	T	42	100	35.4524	Gene: FBgn0031216, Misc. feature: contig 2L_1_3 1..50000(1)	FBpp0077762:c.6153-7C>T
2L mapping	104299	SNV	1	A	T	46	97.8261	35.1556	Exon: Exon, Gene: FBgn0026787, Misc. feature: contig 2L_1_3 1..50000(1), mRNA: FBgn0026787
2L mapping	104670	SNV	1	T	C	41	97.561	34.925	CDS: FBgn0026787, Exon: Exon, Gene: FBgn0026787, Misc. feature: contig 2L_1_3 1..50000(1), mRNA: FBgn0026787	FBpp0290667:c.1753A>G	FBpp0290667:p.Met585Val
2L mapping	106253	SNV	1	T	C	40	100	35.05	CDS: FBgn0026787, Exon: Exon, Gene: FBgn0026787, Misc. feature: contig 2L_1_3 1..50000(1), mRNA: FBgn0026787	FBpp0290667:c.390A>G
2L mapping	107087	Replacement	2	A	TC	30	100	34.2833	Gene: FBgn0005278, Misc. feature: contig 2L_1_3 1..50000(1)
2L mapping	107089	SNV	1	T	G	30	100	35.8333	Gene: FBgn0005278, Misc. feature: contig 2L_1_3 1..50000(1)
2L mapping	107091	Insertion	1	-	G	30	100	35.1667	Gene: FBgn0005278, Misc. feature: contig 2L_1_3 1..50000(1)
2L mapping	107092	SNV	1	G	T	30	100	34.4333	Gene: FBgn0005278, Misc. feature: contig 2L_1_3 1..50000(1)
2L mapping	107094	Insertion	1	-	G	30	100	35.6333	Gene: FBgn0005278, Misc. feature: contig 2L_1_3 1..50000(1)
2L mapping	110539	SNV	1	A	G	40	100	33.7	Gene: FBgn0005278, Misc. feature: contig 2L_1_3 1..50000(1)	FBpp0088449:c.[202+56A>G]; FBpp0088447:c.[202+56A>G]; FBpp0088450:c.[202+56A>G]; FBpp0088446:c.[202+56A>G]; FBpp0088444:c.[202+56A>G]; FBpp0300434:c.[202+56A>G]; FBpp0088445:c.[202+56A>G]; FBpp0088448:c.[202+56A>G]; FBpp0303506:c.[202+56A>G]; FBpp0088926:c.[202+56A>G]; FBpp0088452:c.[121+56A>G]; FBpp0088451:c.[202+56A>G]
2L mapping	111262	SNV	1	A	G	52	98.0769	35.7451	Exon: Exon, Gene: FBgn0005278, Misc. feature: contig 2L_1_3 1..50000(1), mRNA: FBgn0005278	FBpp0088452:c.[357+145A>G]; FBpp0088926:c.[325+385A>G]; FBpp0088449:c.[325+385A>G]; FBpp0088448:c.[325+385A>G]; FBpp0088445:c.[325+385A>G]; FBpp0088444:c.[438+145A>G]; FBpp0088446:c.[325+385A>G]; FBpp0088447:c.[438+145A>G]; FBpp0303506:c.[325+385A>G]; FBpp0088451:c.[438+145A>G]; FBpp0088450:c.[325+385A>G]
2L mapping	115195	SNV	1	A	T	59	96.6102	35.1754	Gene: FBgn0031228, Misc. feature: contig 2L_1_3 1..50000(1)
2L mapping	115614	SNV	1	A	C	54	100	35.3704	Exon: Exon, Exon: Exon, Gene: FBgn0031228, Gene: FBgn0031219, Misc. feature: contig 2L_1_3 1..50000(1), mRNA: FBgn0031219, mRNA: FBgn0031219
2L mapping	123242	SNV	1	C	T	43	100	35.2093	Misc. RNA: FBgn0266304, CDS: FBgn0025683, CDS: FBgn0025683, CDS: FBgn0025683, CDS: FBgn0025683, Exon: Exon, Exon: Exon, Exon: Exon, Gene: FBgn0031228, Gene: FBgn0025683, Gene: FBgn0266304, Misc. feature: contig 2L_1_3 1..50000(1), mRNA: FBgn0025683, mRNA: FBgn0025683, mRNA: FBgn0025683, mRNA: FBgn0025683	FBpp0089109:c.[1987G>A]; FBpp0077813:c.[1984G>A]; FBpp0099791:c.[1984G>A]; FBpp0077812:c.[1987G>A]	FBpp0089109:p.[Asp663Asn]; FBpp0077813:p.[Asp662Asn]; FBpp0099791:p.[Asp662Asn]; FBpp0077812:p.[Asp663Asn]
2L mapping	123259	SNV	1	G	A	50	100	35.4	CDS: FBgn0025683, CDS: FBgn0025683, CDS: FBgn0025683, CDS: FBgn0025683, Exon: Exon, Exon: Exon, Gene: FBgn0031228, Gene: FBgn0025683, Gene: FBgn0266304, Misc. feature: contig 2L_1_3 1..50000(1), mRNA: FBgn0025683, mRNA: FBgn0025683, mRNA: FBgn0025683, mRNA: FBgn0025683	FBpp0099791:c.[1967C>T]; FBpp0077812:c.[1970C>T]; FBpp0089109:c.[1970C>T]; FBpp0077813:c.[1967C>T]	FBpp0099791:p.[Thr656Ile]; FBpp0077812:p.[Thr657Ile]; FBpp0089109:p.[Thr657Ile]; FBpp0077813:p.[Thr656Ile]
2L mapping	127224	SNV	1	C	T	53	98.1132	33.4808	Gene: FBgn0031228, Gene: FBgn0025683, Misc. feature: contig 2L_1_3 1..50000(1)	FBpp0077812:c.[188-997G>A]; FBpp0099791:c.[185-997G>A]; FBpp0089109:c.[188-997G>A]; FBpp0077813:c.[185-997G>A]
2L mapping	127497	SNV	1	C	T	63	98.4127	33.6129	Gene: FBgn0031228, Gene: FBgn0025683, Misc. feature: contig 2L_1_3 1..50000(1)	FBpp0099791:c.[185-1270G>A]; FBpp0077813:c.[185-1270G>A]; FBpp0089109:c.[188-1270G>A]; FBpp0077812:c.[188-1270G>A]
2L mapping	128111	SNV	1	A	T	46	100	35.1957	Gene: FBgn0031228, Gene: FBgn0025683, Misc. feature: contig 2L_1_3 1..50000(1)	FBpp0099791:c.[184+689T>A]; FBpp0089109:c.[187+689T>A]; FBpp0077813:c.[184+689T>A]; FBpp0077812:c.[187+689T>A]
2L mapping	130033	SNV	1	G	A	51	100	35.6863	Gene: FBgn0031228, Gene: FBgn0025683, Misc. feature: contig 2L_1_3 1..50000(1)	FBpp0077812:c.[44+475C>T]; FBpp0089109:c.[44+475C>T]
2L mapping	135369	SNV	1	T	A	60	96.6667	34.7414	Gene: FBgn0031228, Misc. feature: contig 2L_1_3 1..50000(1)
2L mapping	135371	SNV	1	A	G	60	96.6667	35.2586	Gene: FBgn0031228, Misc. feature: contig 2L_1_3 1..50000(1)
2L mapping	136169	SNV	1	T	A	50	100	34.28	Misc. RNA: FBgn0265075, Exon: Exon, Gene: FBgn0031228, Gene: FBgn0265075, Misc. feature: contig 2L_1_3 1..50000(1)
2L mapping	138350	SNV	1	A	G	65	100	36.1692	Gene: FBgn0031228, Misc. feature: contig 2L_1_3 1..50000(1)
2L mapping	143422	SNV	1	G	A	49	100	34.3061	CDS: FBgn0031224, Exon: Exon, Gene: FBgn0031228, Gene: FBgn0031224, Misc. feature: contig 2L_1_3 1..50000(1), mRNA: FBgn0031224	FBpp0077775:c.45G>A
2L mapping	146279	Deletion	1	T	-	46	93.4783	33.4186	Gene: FBgn0031228, Gene: FBgn0259818, Misc. feature: contig 2L_1_3 1..50000(1)	FBpp0291141:c.[3432-369delA]; FBpp0303493:c.[3426-369delA]
2L mapping	146738	Insertion	1	-	C	30	90	35.2963	Gene: FBgn0031228, Gene: FBgn0259818, Misc. feature: contig 2L_1_3 1..50000(1)	FBpp0291141:c.[3431+611_3431+612insG]; FBpp0303493:c.[3425+617_3425+618insG]
2L mapping	147316	Replacement	3	GGC	TT	42	90.4762	35.1754	Gene: FBgn0031228, Gene: FBgn0259818, Misc. feature: contig 2L_1_3 1..50000(1)	FBpp0303493:c.[3425+37_3425+39delGCCinsAA]; FBpp0291141:c.[3431+31_3431+33delGCCinsAA]
2L mapping	147688	SNV	1	C	T	38	100	36.2105	CDS: FBgn0259818, CDS: FBgn0259818, Exon: Exon, Gene: FBgn0031228, Gene: FBgn0259818, Misc. feature: contig 2L_1_3 1..50000(1), mRNA: FBgn0259818, mRNA: FBgn0259818	FBpp0303493:c.[3148G>A]; FBpp0291141:c.[3148G>A]	FBpp0303493:p.[Ala1050Thr]; FBpp0291141:p.[Ala1050Thr]
2L mapping	148266	SNV	1	A	G	40	100	34.55	Gene: FBgn0031228, Gene: FBgn0259818, Misc. feature: contig 2L_1_3 1..50000(1)	FBpp0303493:c.[2828+72T>C]; FBpp0291141:c.[2828+72T>C]
2L mapping	150144	Deletion	1	T	-	42	76.1905	31.5625	Gene: FBgn0031228, Gene: FBgn0259818, Misc. feature: contig 2L_1_4 1..50000(1)	FBpp0291141:c.[1993-918delA]; FBpp0303493:c.[1993-918delA]
2L mapping	150188	SNV	1	A	G	45	86.6667	29.5128	Gene: FBgn0031228, Gene: FBgn0259818, Misc. feature: contig 2L_1_4 1..50000(1)	FBpp0291141:c.[1992+927T>C]; FBpp0303493:c.[1992+927T>C]
2L mapping	150369	Deletion	4	TGCA	-	49	67.3469	35.1515	Gene: FBgn0031228, Gene: FBgn0259818, Misc. feature: contig 2L_1_4 1..50000(1)	FBpp0303493:c.[1992+743_1992+746delTGCA]; FBpp0291141:c.[1992+743_1992+746delTGCA]
2L mapping	150381	SNV	1	T	G	47	100	35.2128	Gene: FBgn0031228, Gene: FBgn0259818, Misc. feature: contig 2L_1_4 1..50000(1)	FBpp0303493:c.[1992+734A>C]; FBpp0291141:c.[1992+734A>C]
2L mapping	151022	SNV	1	T	G	37	100	35.4595	Gene: FBgn0031228, Gene: FBgn0259818, Misc. feature: contig 2L_1_4 1..50000(1)	FBpp0291141:c.[1992+93A>C]; FBpp0303493:c.[1992+93A>C]
2L mapping	151719	SNV	1	G	T	39	100	34.5641	CDS: FBgn0259818, CDS: FBgn0259818, Exon: Exon, Gene: FBgn0031228, Gene: FBgn0259818, Misc. feature: contig 2L_1_4 1..50000(1), mRNA: FBgn0259818, mRNA: FBgn0259818	FBpp0291141:c.[1388C>A]; FBpp0303493:c.[1388C>A]	FBpp0291141:p.[Thr463Asn]; FBpp0303493:p.[Thr463Asn]
2L mapping	152103	SNV	1	A	G	42	100	35.1905	CDS: FBgn0259818, CDS: FBgn0259818, Exon: Exon, Gene: FBgn0031228, Gene: FBgn0259818, Misc. feature: contig 2L_1_4 1..50000(1), mRNA: FBgn0259818, mRNA: FBgn0259818	FBpp0303493:c.[1004T>C]; FBpp0291141:c.[1004T>C]	FBpp0303493:p.[Leu335Ser]; FBpp0291141:p.[Leu335Ser]
2L mapping	152567	SNV	1	C	A	44	100	35.3636	CDS: FBgn0259818, CDS: FBgn0259818, Exon: Exon, Gene: FBgn0031228, Gene: FBgn0259818, Misc. feature: contig 2L_1_4 1..50000(1), mRNA: FBgn0259818, mRNA: FBgn0259818	FBpp0291141:c.[540G>T]; FBpp0303493:c.[540G>T]	FBpp0291141:p.[Glu180Asp]; FBpp0303493:p.[Glu180Asp]
2L mapping	153150	SNV	1	C	T	39	97.4359	33.9474	Exon: Exon, Gene: FBgn0031228, Gene: FBgn0259818, Misc. feature: contig 2L_1_4 1..50000(1), mRNA: FBgn0259818, mRNA: FBgn0259818
2L mapping	153797	SNV	1	A	G	44	100	35.6591	CDS: FBgn0031227, Exon: Exon, Gene: FBgn0031228, Gene: FBgn0031227, Misc. feature: contig 2L_1_4 1..50000(1), mRNA: FBgn0031227	FBpp0077806:c.1383T>C
2L mapping	154698	SNV	1	A	C	48	100	34.2708	CDS: FBgn0031227, Exon: Exon, Gene: FBgn0031228, Gene: FBgn0031227, Misc. feature: contig 2L_1_4 1..50000(1), mRNA: FBgn0031227	FBpp0077806:c.482T>G	FBpp0077806:p.Val161Gly
2L mapping	155545	Replacement	3	G	ATT	41	92.6829	35.5789	Exon: Exon, Exon: Exon, Exon: Exon, Exon: Exon, Gene: FBgn0031228, Misc. feature: contig 2L_1_4 1..50000(1), mRNA: FBgn0031228, mRNA: FBgn0031228, mRNA: FBgn0031228, mRNA: FBgn0031228
2L mapping	155691	SNV	1	C	G	39	100	35.7436	CDS: FBgn0031228, CDS: FBgn0031228, CDS: FBgn0031228, CDS: FBgn0031228, CDS: FBgn0031228, CDS: FBgn0031228, CDS: FBgn0031228, CDS: FBgn0031228, CDS: FBgn0031228, CDS: FBgn0031228, Exon: Exon, Exon: Exon, Exon: Exon, Exon: Exon, Exon: Exon, Exon: Exon, Exon: Exon, Gene: FBgn0031228, Misc. feature: contig 2L_1_4 1..50000(1), mRNA: FBgn0031228, mRNA: FBgn0031228, mRNA: FBgn0031228, mRNA: FBgn0031228…	FBpp0303488:c.[120C>G]; FBpp0077776:c.[120C>G]; FBpp0297500:c.[120C>G]; FBpp0303489:c.[27C>G]; FBpp0291100:c.[120C>G]; FBpp0303492:c.[120C>G]; FBpp0291101:c.[120C>G]; FBpp0303491:c.[120C>G]; FBpp0303490:c.[27C>G]; FBpp0077777:c.[120C>G]
2L mapping	155961	SNV	1	G	T	36	91.6667	35.1515	Exon: Exon, Gene: FBgn0031228, Misc. feature: contig 2L_1_4 1..50000(1), mRNA: FBgn0031228, mRNA: FBgn0031228, mRNA: FBgn0031228, mRNA: FBgn0031228, mRNA: FBgn0031228, mRNA: FBgn0031228, mRNA: FBgn0031228, mRNA: FBgn0031228, mRNA: FBgn0031228, mRNA: FBgn0031228
2L mapping	156084	MNV	2	TC	GA	32	100	35.5625	Exon: Exon, Gene: FBgn0031229, Misc. feature: contig 2L_1_4 1..50000(1), mRNA: FBgn0031229
2L mapping	157709	SNV	1	T	A	55	100	34.8545	Misc. feature: contig 2L_1_4 1..50000(1)
2L mapping	157831	SNV	1	C	A	62	100	34.3548	Misc. feature: contig 2L_1_4 1..50000(1)
2L mapping	158506	SNV	1	G	T	51	100	35.5098	CDS: FBgn0053635, Exon: Exon, Gene: FBgn0053635, Misc. feature: contig 2L_1_4 1..50000(1), mRNA: FBgn0053635	FBpp0090982:c.98C>A	FBpp0090982:p.Pro33Gln
2L mapping	158894	SNV	1	G	A	53	98.1132	35.4231	Misc. feature: contig 2L_1_4 1..50000(1)
2L mapping	158993	SNV	1	C	T	56	100	35.75	Misc. feature: contig 2L_1_4 1..50000(1)
2L mapping	160054	Insertion	2	-	AT	41	100	35.1951	Exon: Exon, Gene: FBgn0016977, Misc. feature: contig 2L_1_4 1..50000(1), mRNA: FBgn0016977
2L mapping	160059	SNV	1	A	T	45	100	34.0667	Exon: Exon, Gene: FBgn0016977, Misc. feature: contig 2L_1_4 1..50000(1), mRNA: FBgn0016977
2L mapping	160228	SNV	1	T	C	56	100	33.4107	Exon: Exon, Gene: FBgn0016977, Misc. feature: contig 2L_1_4 1..50000(1), mRNA: FBgn0016977
2L mapping	160380	SNV	1	G	A	48	100	36.1875	Exon: Exon, Gene: FBgn0016977, Misc. feature: contig 2L_1_4 1..50000(1), mRNA: FBgn0016977
2L mapping	160996	Deletion	1	A	-	29	75.8621	32.8636	Exon: Exon, Gene: FBgn0016977, Misc. feature: contig 2L_1_4 1..50000(1), mRNA: FBgn0016977
2L mapping	161042	SNV	1	T	C	44	97.7273	33.4419	Exon: Exon, Gene: FBgn0016977, Misc. feature: contig 2L_1_4 1..50000(1), mRNA: FBgn0016977
2L mapping	161591	SNV	1	C	T	31	100	35.0968	Exon: Exon, Gene: FBgn0016977, Misc. feature: contig 2L_1_4 1..50000(1), mRNA: FBgn0016977
2L mapping	162966	SNV	1	T	C	45	37.7778	33.7059	CDS: FBgn0016977, CDS: FBgn0016977, Exon: Exon, Exon: Exon, Exon: Exon, Gene: FBgn0016977, Misc. feature: contig 2L_1_4 1..50000(1), mRNA: FBgn0016977, mRNA: FBgn0016977, mRNA: FBgn0016977, mRNA: FBgn0016977, mRNA: FBgn0016977	FBpp0077780:c.[144T>C]; FBpp0077781:c.[144T>C]
2L mapping	163981	Insertion	1	-	T	55	90.9091	34.32	Gene: FBgn0016977, Misc. feature: contig 2L_1_4 1..50000(1)	FBpp0077780:c.[179+979_179+980insT]; FBpp0077781:c.[179+979_179+980insT]
2L mapping	164518	Deletion	3	AAG	-	61	77.0492	35.0638	Gene: FBgn0016977, Misc. feature: contig 2L_1_4 1..50000(1)	FBpp0077781:c.[179+1517_179+1519delAAG]; FBpp0077780:c.[179+1517_179+1519delAAG]
2L mapping	164690	SNV	1	A	C	63	100	34.9365	Gene: FBgn0016977, Misc. feature: contig 2L_1_4 1..50000(1)	FBpp0077781:c.[179+1689A>C]; FBpp0077780:c.[179+1689A>C]
2L mapping	165228	SNV	1	A	T	47	100	35.1064	Gene: FBgn0016977, Misc. feature: contig 2L_1_4 1..50000(1)	FBpp0077780:c.[179+2227A>T]; FBpp0077781:c.[179+2227A>T]
2L mapping	165233	SNV	1	C	A	47	100	34.9362	Gene: FBgn0016977, Misc. feature: contig 2L_1_4 1..50000(1)	FBpp0077780:c.[179+2232C>A]; FBpp0077781:c.[179+2232C>A]
2L mapping	165238	SNV	1	T	C	50	100	35.74	Gene: FBgn0016977, Misc. feature: contig 2L_1_4 1..50000(1)	FBpp0077780:c.[179+2237T>C]; FBpp0077781:c.[179+2237T>C]
2L mapping	165314	SNV	1	T	C	63	100	35.2222	Gene: FBgn0016977, Misc. feature: contig 2L_1_4 1..50000(1)	FBpp0077780:c.[179+2313T>C]; FBpp0077781:c.[179+2313T>C]
2L mapping	167152	SNV	1	A	G	62	100	34.3387	Gene: FBgn0016977, Misc. feature: contig 2L_1_4 1..50000(1)	FBpp0077781:c.[179+4151A>G]; FBpp0077780:c.[179+4151A>G]
2L mapping	171280	SNV	1	A	G	60	100	35.2	Gene: FBgn0016977, Misc. feature: contig 2L_1_4 1..50000(1)	FBpp0077780:c.[179+8279A>G]; FBpp0077781:c.[179+8279A>G]
2L mapping	171817	SNV	1	G	A	57	100	34.3509	Gene: FBgn0016977, Misc. feature: contig 2L_1_4 1..50000(1)	FBpp0077781:c.[179+8816G>A]; FBpp0077780:c.[179+8816G>A]
2L mapping	172310	Insertion	1	-	T	38	36.8421	29.2857	Gene: FBgn0016977, Misc. feature: contig 2L_1_4 1..50000(1)	FBpp0077780:c.[179+9308_179+9309insT]; FBpp0077781:c.[179+9308_179+9309insT]
2L mapping	173244	Insertion	2	-	AG	57	89.4737	34.2941	Gene: FBgn0016977, Misc. feature: contig 2L_1_4 1..50000(1)	FBpp0077781:c.[179+10242_179+10243insAG]; FBpp0077780:c.[179+10242_179+10243insAG]
2L mapping	173685	SNV	1	G	T	51	100	34.2745	Gene: FBgn0016977, Misc. feature: contig 2L_1_4 1..50000(1)	FBpp0077781:c.[180-10076G>T]; FBpp0077780:c.[180-10076G>T]
2L mapping	174630	Insertion	1	-	T	58	70.6897	35.2439	Gene: FBgn0016977, Misc. feature: contig 2L_1_4 1..50000(1)	FBpp0077781:c.[180-9132_180-9131insT]; FBpp0077780:c.[180-9132_180-9131insT]
2L mapping	183483	Deletion	1	A	-	45	73.3333	30.8182	Gene: FBgn0016977, Misc. feature: contig 2L_1_4 1..50000(1)	FBpp0077780:c.[180-278delA]; FBpp0303502:c.[15-278delA]; FBpp0077781:c.[180-278delA]; FBpp0303503:c.[30-278delA]; FBpp0304614:c.[8+64delA]; FBpp0077782:c.[8+64delA]; FBpp0304613:c.[15-278delA]; FBpp0297434:c.[15-278delA]
2L mapping	183672	SNV	1	G	A	57	100	32.6667	Gene: FBgn0016977, Misc. feature: contig 2L_1_4 1..50000(1)	FBpp0077782:c.[9-89G>A]; FBpp0303502:c.[15-89G>A]; FBpp0077781:c.[180-89G>A]; FBpp0304614:c.[9-89G>A]; FBpp0303503:c.[30-89G>A]; FBpp0297434:c.[15-89G>A]; FBpp0304613:c.[15-89G>A]; FBpp0077780:c.[180-89G>A]
2L mapping	187382	Deletion	1	T	-	38	78.9474	33.1667	Gene: FBgn0016977, Misc. feature: contig 2L_1_4 1..50000(1)	FBpp0297434:c.[3133-100delT]; FBpp0303502:c.[3133-100delT]; FBpp0077781:c.[3298-100delT]; FBpp0303503:c.[3148-100delT]; FBpp0077780:c.[3298-100delT]; FBpp0304613:c.[3079-100delT]; FBpp0077782:c.[3127-100delT]; FBpp0304614:c.[3073-100delT]
2L mapping	193405	SNV	1	C	G	45	100	34.1333	CDS: FBgn0016977, CDS: FBgn0016977, CDS: FBgn0016977, CDS: FBgn0016977, CDS: FBgn0016977, CDS: FBgn0016977, CDS: FBgn0016977, CDS: FBgn0016977, Exon: Exon, Gene: FBgn0016977, Misc. feature: contig 2L_1_4 1..50000(1), mRNA: FBgn0016977, mRNA: FBgn0016977, mRNA: FBgn0016977, mRNA: FBgn0016977, mRNA: FBgn0016977, mRNA: FBgn0016977, mRNA: FBgn0016977, mRNA: FBgn0016977	FBpp0303503:c.[9071C>G]; FBpp0304614:c.[8996C>G]; FBpp0303502:c.[9056C>G]; FBpp0077782:c.[9050C>G]; FBpp0077781:c.[9221C>G]; FBpp0077780:c.[9221C>G]; FBpp0304613:c.[9002C>G]; FBpp0297434:c.[9056C>G]	FBpp0303503:p.[Pro3024Arg]; FBpp0304614:p.[Pro2999Arg]; FBpp0303502:p.[Pro3019Arg]; FBpp0077782:p.[Pro3017Arg]; FBpp0077781:p.[Pro3074Arg]; FBpp0077780:p.[Pro3074Arg]; FBpp0304613:p.[Pro3001Arg]; FBpp0297434:p.[Pro3019Arg]
2L mapping	200342	SNV	1	T	C	46	100	34.6087	Gene: FBgn0016977, Misc. feature: contig 2L_1_5 1..50000(1)	FBpp0077782:c.[15523+27T>C]; FBpp0304613:c.[15556+27T>C]; FBpp0303503:c.[15625+27T>C]; FBpp0304614:c.[15469+27T>C]; FBpp0077781:c.[15775+27T>C]; FBpp0077780:c.[15694+27T>C]; FBpp0303502:c.[15610+27T>C]; FBpp0297434:c.[15610+27T>C]
2L mapping	202875	SNV	1	A	T	53	94.3396	34.28	Exon: Exon, Exon: Exon, Gene: FBgn0016977, Misc. feature: contig 2L_1_5 1..50000(1), mRNA: FBgn0016977, mRNA: FBgn0016977, mRNA: FBgn0016977, mRNA: FBgn0016977
2L mapping	206256	SNV	1	G	T	68	100	35.5	Gene: FBgn0031232, Misc. feature: contig 2L_1_5 1..50000(1)
2L mapping	207133	SNV	1	A	G	46	100	34.413	Gene: FBgn0031232, Misc. feature: contig 2L_1_5 1..50000(1)
2L mapping	207210	SNV	1	A	T	51	98.0392	35.52	Exon: Exon, Gene: FBgn0031232, Gene: FBgn0031233, Misc. feature: contig 2L_1_5 1..50000(1), mRNA: FBgn0031233
2L mapping	209243	SNV	1	T	C	55	100	34.7455	CDS: FBgn0031233, CDS: FBgn0031233, CDS: FBgn0031233, Exon: Exon, Exon: Exon, Gene: FBgn0031233, Misc. feature: contig 2L_1_5 1..50000(1), mRNA: FBgn0031233, mRNA: FBgn0031233, mRNA: FBgn0031233	FBpp0304615:c.[1533T>C]; FBpp0304616:c.[1533T>C]; FBpp0077784:c.[1533T>C]
2L mapping	210678	SNV	1	C	T	59	98.3051	35.4483	Exon: Exon, Gene: FBgn0031233, Misc. feature: contig 2L_1_5 1..50000(1), mRNA: FBgn0031233
2L mapping	213547	SNV	1	A	G	37	100	35.8649	CDS: FBgn0266557, CDS: FBgn0266557, CDS: FBgn0266557, CDS: FBgn0266557, CDS: FBgn0266557, CDS: FBgn0266557, Exon: Exon, Gene: FBgn0266557, Misc. feature: contig 2L_1_5 1..50000(1), mRNA: FBgn0266557, mRNA: FBgn0266557, mRNA: FBgn0266557, mRNA: FBgn0266557, mRNA: FBgn0266557, mRNA: FBgn0266557	FBpp0077803:c.[14607T>C]; FBpp0300575:c.[14214T>C]; FBpp0300574:c.[14397T>C]; FBpp0077804:c.[5094T>C]; FBpp0289115:c.[15192T>C]; FBpp0300573:c.[14670T>C]
2L mapping	218829	SNV	1	C	A	33	100	33.1515	CDS: FBgn0266557, CDS: FBgn0266557, CDS: FBgn0266557, CDS: FBgn0266557, CDS: FBgn0266557, CDS: FBgn0266557, Exon: Exon, Gene: FBgn0266557, Misc. feature: contig 2L_1_5 1..50000(1), mRNA: FBgn0266557, mRNA: FBgn0266557, mRNA: FBgn0266557, mRNA: FBgn0266557, mRNA: FBgn0266557, mRNA: FBgn0266557	FBpp0300573:c.[9771G>T]; FBpp0077804:c.[195G>T]; FBpp0300575:c.[9315G>T]; FBpp0077803:c.[9708G>T]; FBpp0300574:c.[9498G>T]; FBpp0289115:c.[10293G>T]
2L mapping	219091	SNV	1	C	T	34	100	36.5882	Gene: FBgn0266557, Misc. feature: contig 2L_1_5 1..50000(1)	FBpp0300573:c.[9715-206G>A]; FBpp0289115:c.[10237-206G>A]; FBpp0300575:c.[9259-206G>A]; FBpp0300574:c.[9442-206G>A]; FBpp0077803:c.[9652-206G>A]; FBpp0077804:c.[139-206G>A]
2L mapping	219102	Deletion	1	A	-	33	87.8788	35.8276	Gene: FBgn0266557, Misc. feature: contig 2L_1_5 1..50000(1)	FBpp0077803:c.[9652-217delT]; FBpp0300575:c.[9259-217delT]; FBpp0300573:c.[9715-217delT]; FBpp0289115:c.[10237-217delT]; FBpp0300574:c.[9442-217delT]; FBpp0077804:c.[139-217delT]
2L mapping	219104	Deletion	2	AG	-	33	87.8788	35.2414	Gene: FBgn0266557, Misc. feature: contig 2L_1_5 1..50000(1)	FBpp0077804:c.[139-220_139-219delCT]; FBpp0300575:c.[9259-220_9259-219delCT]; FBpp0077803:c.[9652-220_9652-219delCT]; FBpp0300573:c.[9715-220_9715-219delCT]; FBpp0300574:c.[9442-220_9442-219delCT]; FBpp0289115:c.[10237-220_10237-219delCT]
2L mapping	219107	Deletion	1	C	-	33	87.8788	35.2414	Gene: FBgn0266557, Misc. feature: contig 2L_1_5 1..50000(1)	FBpp0300573:c.[9715-222delG]; FBpp0300575:c.[9259-222delG]; FBpp0077803:c.[9652-222delG]; FBpp0300574:c.[9442-222delG]; FBpp0289115:c.[10237-222delG]; FBpp0077804:c.[139-222delG]
2L mapping	219124	SNV	1	T	C	34	100	36.2353	Gene: FBgn0266557, Misc. feature: contig 2L_1_5 1..50000(1)	FBpp0077804:c.[139-239A>G]; FBpp0077803:c.[9652-239A>G]; FBpp0300573:c.[9715-239A>G]; FBpp0300575:c.[9259-239A>G]; FBpp0289115:c.[10237-239A>G]; FBpp0300574:c.[9442-239A>G]
2L mapping	219902	SNV	1	T	G	24	100	35.25	Misc. RNA: FBgn0265151, Exon: Exon, Gene: FBgn0266557, Gene: FBgn0265151, Misc. feature: contig 2L_1_5 1..50000(1)	FBpp0289115:c.[10237-1017A>C]; FBpp0077804:c.[139-1017A>C]; FBpp0300575:c.[9259-1017A>C]; FBpp0300574:c.[9442-1017A>C]; FBpp0300573:c.[9715-1017A>C]; FBpp0077803:c.[9652-1017A>C]
2L mapping	220630	SNV	1	T	A	32	100	35.7812	Gene: FBgn0266557, Misc. feature: contig 2L_1_5 1..50000(1)	FBpp0300574:c.[9442-1745A>T]; FBpp0289115:c.[10237-1745A>T]; FBpp0077804:c.[138+876A>T]; FBpp0077803:c.[9652-1745A>T]; FBpp0300575:c.[9259-1745A>T]; FBpp0300573:c.[9715-1745A>T]
2L mapping	221416	SNV	1	C	G	38	100	34.6579	Gene: FBgn0266557, Misc. feature: contig 2L_1_5 1..50000(1)	FBpp0077804:c.[138+90G>C]; FBpp0289115:c.[10237-2531G>C]; FBpp0300574:c.[9442-2531G>C]; FBpp0077803:c.[9652-2531G>C]; FBpp0300573:c.[9715-2531G>C]; FBpp0300575:c.[9259-2531G>C]
2L mapping	224947	SNV	1	C	T	35	100	35.8857	Gene: FBgn0266557, Misc. feature: contig 2L_1_5 1..50000(1)	FBpp0077803:c.[9651+1169G>A]; FBpp0289115:c.[10236+1169G>A]; FBpp0300573:c.[9714+1169G>A]; FBpp0300574:c.[9441+1169G>A]; FBpp0300575:c.[9258+2425G>A]
2L mapping	225718	SNV	1	T	A	26	100	34	Gene: FBgn0266557, Misc. feature: contig 2L_1_5 1..50000(1)	FBpp0289115:c.[10236+398A>T]; FBpp0300575:c.[9258+1654A>T]; FBpp0300574:c.[9441+398A>T]; FBpp0077803:c.[9651+398A>T]; FBpp0300573:c.[9714+398A>T]
2L mapping	226359	SNV	1	A	G	16	100	34.6875	CDS: FBgn0266557, CDS: FBgn0266557, CDS: FBgn0266557, CDS: FBgn0266557, Exon: Exon, Gene: FBgn0266557, Misc. feature: contig 2L_1_5 1..50000(1), mRNA: FBgn0266557, mRNA: FBgn0266557, mRNA: FBgn0266557, mRNA: FBgn0266557	FBpp0300573:c.[9471T>C]; FBpp0300575:c.[9258+1013T>C]; FBpp0289115:c.[9993T>C]; FBpp0077803:c.[9408T>C]; FBpp0300574:c.[9198T>C]
2L mapping	226835	SNV	1	T	C	27	100	36	Gene: FBgn0266557, Misc. feature: contig 2L_1_5 1..50000(1)	FBpp0300573:c.[9322-327A>G]; FBpp0300575:c.[9258+537A>G]; FBpp0077803:c.[9259-327A>G]; FBpp0300574:c.[9049-327A>G]; FBpp0289115:c.[9844-327A>G]
2L mapping	228194	SNV	1	A	G	26	100	35.2692	Misc. RNA: FBgn0265152, CDS: FBgn0266557, CDS: FBgn0266557, CDS: FBgn0266557, CDS: FBgn0266557, CDS: FBgn0266557, Exon: Exon, Exon: Exon, Exon: Exon, Gene: FBgn0266557, Gene: FBgn0265152, Misc. feature: contig 2L_1_5 1..50000(1), mRNA: FBgn0266557, mRNA: FBgn0266557, mRNA: FBgn0266557, mRNA: FBgn0266557, mRNA: FBgn0266557	FBpp0300575:c.[9021T>C]; FBpp0300574:c.[8811T>C]; FBpp0300573:c.[9084T>C]; FBpp0077803:c.[9021T>C]; FBpp0289115:c.[9021T>C]
2L mapping	228336	SNV	1	T	C	44	100	34.2955	Misc. RNA: FBgn0265152, Exon: Exon, Gene: FBgn0266557, Gene: FBgn0265152, Misc. feature: contig 2L_1_5 1..50000(1)	FBpp0289115:c.[8934-55A>G]; FBpp0300574:c.[8724-55A>G]; FBpp0300575:c.[8934-55A>G]; FBpp0300573:c.[8997-55A>G]; FBpp0077803:c.[8934-55A>G]
2L mapping	228339	SNV	1	T	A	43	100	35.1163	Misc. RNA: FBgn0265152, Exon: Exon, Gene: FBgn0266557, Gene: FBgn0265152, Misc. feature: contig 2L_1_5 1..50000(1)	FBpp0077803:c.[8934-58A>T]; FBpp0300574:c.[8724-58A>T]; FBpp0289115:c.[8934-58A>T]; FBpp0300573:c.[8997-58A>T]; FBpp0300575:c.[8934-58A>T]
2L mapping	228351	SNV	1	A	G	38	100	35.9211	Misc. RNA: FBgn0265152, Exon: Exon, Gene: FBgn0266557, Gene: FBgn0265152, Misc. feature: contig 2L_1_5 1..50000(1)	FBpp0289115:c.[8934-70T>C]; FBpp0077803:c.[8934-70T>C]; FBpp0300574:c.[8724-70T>C]; FBpp0300573:c.[8997-70T>C]; FBpp0300575:c.[8934-70T>C]
2L mapping	228903	SNV	1	T	C	36	97.2222	34.6571	Gene: FBgn0266557, Misc. feature: contig 2L_1_5 1..50000(1)	FBpp0289115:c.[8933+270A>G]; FBpp0077803:c.[8933+270A>G]; FBpp0300573:c.[8996+270A>G]; FBpp0300575:c.[8933+270A>G]; FBpp0300574:c.[8724-622A>G]
2L mapping	229424	SNV	1	T	G	40	100	34.875	Gene: FBgn0266557, Misc. feature: contig 2L_1_5 1..50000(1)	FBpp0289115:c.[8724-42A>C]; FBpp0300575:c.[8724-42A>C]; FBpp0300573:c.[8787-42A>C]; FBpp0300574:c.[8723+1114A>C]; FBpp0077803:c.[8724-42A>C]
2L mapping	229557	Insertion	2	-	AT	31	80.6452	35.3	Gene: FBgn0266557, Misc. feature: contig 2L_1_5 1..50000(1)	FBpp0077803:c.[8724-175_8724-174insAT]; FBpp0300573:c.[8787-175_8787-174insAT]; FBpp0289115:c.[8724-175_8724-174insAT]; FBpp0300575:c.[8724-175_8724-174insAT]; FBpp0300574:c.[8723+981_8723+982insAT]
2L mapping	229684	Insertion	1	-	T	25	64	34.6875	Gene: FBgn0266557, Misc. feature: contig 2L_1_5 1..50000(1)	FBpp0077803:c.[8724-302_8724-301insA]; FBpp0300573:c.[8786+246_8786+247insA]; FBpp0289115:c.[8724-302_8724-301insA]; FBpp0300575:c.[8724-302_8724-301insA]; FBpp0300574:c.[8723+854_8723+855insA]
2L mapping	229849	SNV	1	T	C	36	100	34.3333	Gene: FBgn0266557, Misc. feature: contig 2L_1_5 1..50000(1)	FBpp0077803:c.[8724-467A>G]; FBpp0300574:c.[8723+689A>G]; FBpp0300575:c.[8724-467A>G]; FBpp0289115:c.[8724-467A>G]; FBpp0300573:c.[8786+81A>G]
2L mapping	230346	Insertion	1	-	T	37	43.2432	30.8125	Gene: FBgn0266557, Misc. feature: contig 2L_1_5 1..50000(1)	FBpp0289115:c.[8723+192_8723+193insA]; FBpp0077803:c.[8723+192_8723+193insA]; FBpp0300574:c.[8723+192_8723+193insA]; FBpp0300573:c.[8738+192_8738+193insA]; FBpp0300575:c.[8723+192_8723+193insA]
2L mapping	232131	SNV	1	A	T	40	100	36.2	Gene: FBgn0266557, Misc. feature: contig 2L_1_5 1..50000(1)	FBpp0077803:c.[8218-30T>A]; FBpp0300573:c.[8218-30T>A]; FBpp0300574:c.[8218-30T>A]; FBpp0289115:c.[8218-30T>A]; FBpp0300575:c.[8218-30T>A]
2L mapping	232383	Insertion	1	-	A	37	86.4865	33.5625	Gene: FBgn0266557, Misc. feature: contig 2L_1_5 1..50000(1)	FBpp0300574:c.[8130-4_8130-3insT]; FBpp0300575:c.[8130-4_8130-3insT]; FBpp0077803:c.[8130-4_8130-3insT]; FBpp0289115:c.[8130-4_8130-3insT]; FBpp0300573:c.[8130-4_8130-3insT]
2L mapping	232505	MNV	2	AC	CA	40	95	36.1579	Exon: Exon, Gene: FBgn0266557, Gene: FBgn0031235, Misc. feature: contig 2L_1_5 1..50000(1), mRNA: FBgn0031235	FBpp0300573:c.[8130-127_8130-126delGTinsTG]; FBpp0289115:c.[8130-127_8130-126delGTinsTG]; FBpp0300575:c.[8130-127_8130-126delGTinsTG]; FBpp0077803:c.[8130-127_8130-126delGTinsTG]; FBpp0300574:c.[8130-127_8130-126delGTinsTG]
2L mapping	233114	SNV	1	A	T	38	100	34.7105	CDS: FBgn0031235, Exon: Exon, Gene: FBgn0266557, Gene: FBgn0031235, Misc. feature: contig 2L_1_5 1..50000(1), mRNA: FBgn0031235	FBpp0077785:c.[543A>T]; FBpp0300574:c.[8130-735T>A]; FBpp0300573:c.[8130-735T>A]; FBpp0300575:c.[8130-735T>A]; FBpp0077803:c.[8130-735T>A]; FBpp0289115:c.[8130-735T>A]
2L mapping	233746	SNV	1	T	C	34	100	35.1471	CDS: FBgn0031235, Exon: Exon, Gene: FBgn0266557, Gene: FBgn0031235, Misc. feature: contig 2L_1_5 1..50000(1), mRNA: FBgn0031235	FBpp0300575:c.[8129+251A>G]; FBpp0077803:c.[8129+251A>G]; FBpp0300574:c.[8129+251A>G]; FBpp0289115:c.[8129+251A>G]; FBpp0300573:c.[8129+251A>G]; FBpp0077785:c.[1113T>C]
2L mapping	242233	SNV	1	C	T	32	100	35.4375	Gene: FBgn0266557, Misc. feature: contig 2L_1_5 1..50000(1)	FBpp0300573:c.[44+11G>A]; FBpp0300575:c.[44+11G>A]; FBpp0289115:c.[44+11G>A]; FBpp0077803:c.[44+11G>A]; FBpp0300574:c.[44+11G>A]
2L mapping	242336	SNV	1	A	G	40	100	34.675	Exon: Exon, Exon: Exon, Gene: FBgn0266557, Misc. feature: contig 2L_1_5 1..50000(1), mRNA: FBgn0266557, mRNA: FBgn0266557, mRNA: FBgn0266557, mRNA: FBgn0266557, mRNA: FBgn0266557
2L mapping	244535	SNV	1	C	T	38	39.4737	37	Gene: FBgn0266557, Misc. feature: contig 2L_1_5 1..50000(1)
2L mapping	245355	SNV	1	A	T	29	100	35.5862	Gene: FBgn0266557, Misc. feature: contig 2L_1_5 1..50000(1)
2L mapping	250497	Deletion	1	A	-	32	81.25	31.8462	Gene: FBgn0266557, Misc. feature: contig 2L_1_6 1..50000(1)
2L mapping	250501	Deletion	1	A	-	26	100	35.2692	Gene: FBgn0266557, Misc. feature: contig 2L_1_6 1..50000(1)
2L mapping	250503	SNV	1	A	T	26	100	35.1154	Gene: FBgn0266557, Misc. feature: contig 2L_1_6 1..50000(1)
2L mapping	250626	SNV	1	G	C	38	100	34.4474	Gene: FBgn0266557, Misc. feature: contig 2L_1_6 1..50000(1)
2L mapping	254400	Insertion	1	-	A	36	66.6667	36.4167	Exon: Exon, Gene: FBgn0031238, Misc. feature: contig 2L_1_6 1..50000(1), mRNA: FBgn0031238
2L mapping	254504	SNV	1	C	T	30	100	34.2	Gene: FBgn0031238, Misc. feature: contig 2L_1_6 1..50000(1)
2L mapping	255152	Deletion	2	CA	-	34	88.2353	35.7667	Gene: FBgn0031238, Misc. feature: contig 2L_1_6 1..50000(1)
2L mapping	255222	Replacement	4	G	AAAT	30	100	34.6333	Gene: FBgn0031238, Misc. feature: contig 2L_1_6 1..50000(1)
2L mapping	256884	SNV	1	A	G	16	100	35.625	Gene: FBgn0031238, Misc. feature: contig 2L_1_6 1..50000(1)
2L mapping	257534	SNV	1	C	G	28	100	34.5	Gene: FBgn0031238, Misc. feature: contig 2L_1_6 1..50000(1)
2L mapping	257815	Deletion	7	AAGTGGA	-	30	86.6667	33.3846	Gene: FBgn0031238, Misc. feature: contig 2L_1_6 1..50000(1)
2L mapping	258215	SNV	1	T	G	34	100	35.7353	Gene: FBgn0031238, Misc. feature: contig 2L_1_6 1..50000(1)
2L mapping	259402	SNV	1	A	C	29	96.5517	31.5357	Gene: FBgn0031238, Misc. feature: contig 2L_1_6 1..50000(1)
2L mapping	259407	SNV	1	A	G	28	100	32.3214	Gene: FBgn0031238, Misc. feature: contig 2L_1_6 1..50000(1)
2L mapping	259412	SNV	1	T	C	28	96.4286	34.2222	Gene: FBgn0031238, Misc. feature: contig 2L_1_6 1..50000(1)
2L mapping	259492	Insertion	2	-	AA	27	66.6667	35.6389	Gene: FBgn0031238, Misc. feature: contig 2L_1_6 1..50000(1)
2L mapping	259593	SNV	1	G	T	26	100	34.5769	Gene: FBgn0031238, Misc. feature: contig 2L_1_6 1..50000(1)
2L mapping	259613	SNV	1	C	A	22	100	36.3636	Gene: FBgn0031238, Misc. feature: contig 2L_1_6 1..50000(1)
2L mapping	259747	SNV	1	G	C	24	100	32.8333	Gene: FBgn0031238, Misc. feature: contig 2L_1_6 1..50000(1)
2L mapping	259754	SNV	1	A	G	26	100	34.8846	Gene: FBgn0031238, Misc. feature: contig 2L_1_6 1..50000(1)
2L mapping	260161	SNV	1	T	G	31	83.871	31.6538	Exon: Exon, Gene: FBgn0031238, Gene: FBgn0031239, Misc. feature: contig 2L_1_6 1..50000(1), mRNA: FBgn0031239
2L mapping	260488	SNV	1	A	G	40	97.5	36.5385	Exon: Exon, Gene: FBgn0031238, Gene: FBgn0031239, Misc. feature: contig 2L_1_6 1..50000(1), mRNA: FBgn0031239
2L mapping	260726	SNV	1	A	T	40	100	34.65	Exon: Exon, Gene: FBgn0031238, Gene: FBgn0031239, Misc. feature: contig 2L_1_6 1..50000(1), mRNA: FBgn0031239
2L mapping	260915	SNV	1	A	G	24	100	35.0417	Exon: Exon, Gene: FBgn0031238, Gene: FBgn0031239, Misc. feature: contig 2L_1_6 1..50000(1), mRNA: FBgn0031239
2L mapping	261114	SNV	1	A	C	41	100	34.4634	Exon: Exon, Gene: FBgn0031238, Gene: FBgn0031239, Misc. feature: contig 2L_1_6 1..50000(1), mRNA: FBgn0031239
2L mapping	261358	SNV	1	G	A	15	100	32.4667	Exon: Exon, Gene: FBgn0031238, Gene: FBgn0031239, Misc. feature: contig 2L_1_6 1..50000(1), mRNA: FBgn0031239
2L mapping	261447	Deletion	9	CTCTACGCC	-	20	85	34.3529	Exon: Exon, Gene: FBgn0031238, Gene: FBgn0031239, Misc. feature: contig 2L_1_6 1..50000(1), mRNA: FBgn0031239
2L mapping	261646	SNV	1	A	G	29	100	33.3793	Exon: Exon, Gene: FBgn0031238, Gene: FBgn0031239, Misc. feature: contig 2L_1_6 1..50000(1), mRNA: FBgn0031239
2L mapping	262506	SNV	1	G	A	39	100	33.2051	Misc. RNA: FBgn0265150, Exon: Exon, Exon: Exon, Gene: FBgn0031238, Gene: FBgn0031239, Gene: FBgn0265150, Misc. feature: contig 2L_1_6 1..50000(1), mRNA: FBgn0031239
2L mapping	262825	SNV	1	C	A	40	100	35.425	Misc. RNA: FBgn0265150, Exon: Exon, Exon: Exon, Gene: FBgn0031238, Gene: FBgn0031239, Gene: FBgn0265150, Misc. feature: contig 2L_1_6 1..50000(1), mRNA: FBgn0031239
2L mapping	263051	Insertion	2	-	AA	36	91.6667	35.6667	Exon: Exon, Gene: FBgn0031238, Gene: FBgn0031239, Misc. feature: contig 2L_1_6 1..50000(1), mRNA: FBgn0031239
2L mapping	263148	SNV	1	A	G	36	100	34.7222	Exon: Exon, Gene: FBgn0031238, Gene: FBgn0031239, Misc. feature: contig 2L_1_6 1..50000(1), mRNA: FBgn0031239
2L mapping	263171	SNV	1	G	C	35	100	33.8571	Exon: Exon, Gene: FBgn0031238, Gene: FBgn0031239, Misc. feature: contig 2L_1_6 1..50000(1), mRNA: FBgn0031239
2L mapping	263222	SNV	1	G	A	32	100	35.3438	Exon: Exon, Gene: FBgn0031238, Gene: FBgn0031239, Misc. feature: contig 2L_1_6 1..50000(1), mRNA: FBgn0031239
2L mapping	263238	SNV	1	T	A	42	100	34.2857	Exon: Exon, Gene: FBgn0031238, Gene: FBgn0031239, Misc. feature: contig 2L_1_6 1..50000(1), mRNA: FBgn0031239
2L mapping	263253	SNV	1	C	T	43	100	35.5349	Exon: Exon, Gene: FBgn0031238, Gene: FBgn0031239, Misc. feature: contig 2L_1_6 1..50000(1), mRNA: FBgn0031239
2L mapping	263266	SNV	1	T	C	48	100	34.875	Exon: Exon, Gene: FBgn0031238, Gene: FBgn0031239, Misc. feature: contig 2L_1_6 1..50000(1), mRNA: FBgn0031239
2L mapping	263273	SNV	1	C	T	50	100	35.1	Exon: Exon, Gene: FBgn0031238, Gene: FBgn0031239, Misc. feature: contig 2L_1_6 1..50000(1), mRNA: FBgn0031239
2L mapping	263328	SNV	1	T	G	39	100	34.4359	Exon: Exon, Gene: FBgn0031238, Gene: FBgn0031239, Misc. feature: contig 2L_1_6 1..50000(1), mRNA: FBgn0031239
2L mapping	263341	SNV	1	T	C	37	100	34.5135	Exon: Exon, Gene: FBgn0031238, Gene: FBgn0031239, Misc. feature: contig 2L_1_6 1..50000(1), mRNA: FBgn0031239
2L mapping	263403	SNV	1	A	G	28	100	34.7143	Exon: Exon, Gene: FBgn0031238, Gene: FBgn0031239, Misc. feature: contig 2L_1_6 1..50000(1), mRNA: FBgn0031239
2L mapping	263485	SNV	1	A	C	38	100	35.5526	Exon: Exon, Exon: Exon, Gene: FBgn0031238, Gene: FBgn0031239, Misc. feature: contig 2L_1_6 1..50000(1), mRNA: FBgn0031239, mRNA: FBgn0031239
2L mapping	263587	SNV	1	C	A	28	100	35.2143	Exon: Exon, Exon: Exon, Gene: FBgn0031238, Gene: FBgn0031239, Misc. feature: contig 2L_1_6 1..50000(1), mRNA: FBgn0031239, mRNA: FBgn0031239
2L mapping	264313	SNV	1	T	G	24	100	32.4167	CDS: FBgn0031239, CDS: FBgn0031239, Exon: Exon, Exon: Exon, Gene: FBgn0031238, Gene: FBgn0031239, Misc. feature: contig 2L_1_6 1..50000(1), mRNA: FBgn0031239, mRNA: FBgn0031239	FBpp0300572:c.[2376A>C]; FBpp0077801:c.[2376A>C]	FBpp0300572:p.[Lys792Asn]; FBpp0077801:p.[Lys792Asn]
2L mapping	265051	SNV	1	C	G	34	100	34.7647	CDS: FBgn0031239, CDS: FBgn0031239, Exon: Exon, Exon: Exon, Gene: FBgn0031238, Gene: FBgn0031239, Misc. feature: contig 2L_1_6 1..50000(1), mRNA: FBgn0031239, mRNA: FBgn0031239	FBpp0300572:c.[1638G>C]; FBpp0077801:c.[1638G>C]
2L mapping	265162	SNV	1	A	G	33	100	34.3333	CDS: FBgn0031239, CDS: FBgn0031239, Exon: Exon, Exon: Exon, Gene: FBgn0031238, Gene: FBgn0031239, Misc. feature: contig 2L_1_6 1..50000(1), mRNA: FBgn0031239, mRNA: FBgn0031239	FBpp0077801:c.[1527T>C]; FBpp0300572:c.[1527T>C]
2L mapping	265828	SNV	1	T	C	26	100	34.4615	CDS: FBgn0031239, CDS: FBgn0031239, Exon: Exon, Exon: Exon, Gene: FBgn0031238, Gene: FBgn0031239, Misc. feature: contig 2L_1_6 1..50000(1), mRNA: FBgn0031239, mRNA: FBgn0031239	FBpp0300572:c.[861A>G]; FBpp0077801:c.[861A>G]
2L mapping	266595	SNV	1	C	T	42	100	35.8333	CDS: FBgn0031239, CDS: FBgn0031239, Exon: Exon, Exon: Exon, Gene: FBgn0031238, Gene: FBgn0031239, Misc. feature: contig 2L_1_6 1..50000(1), mRNA: FBgn0031239, mRNA: FBgn0031239	FBpp0077801:c.[94G>A]; FBpp0300572:c.[94G>A]	FBpp0077801:p.[Gly32Ser]; FBpp0300572:p.[Gly32Ser]
2L mapping	266868	SNV	1	G	T	41	100	35.561	Exon: Exon, Exon: Exon, Gene: FBgn0031238, Gene: FBgn0031239, Misc. feature: contig 2L_1_6 1..50000(1), mRNA: FBgn0031239, mRNA: FBgn0031239
2L mapping	267002	SNV	1	T	A	42	100	35.9286	Exon: Exon, Exon: Exon, Gene: FBgn0031238, Gene: FBgn0031239, Misc. feature: contig 2L_1_6 1..50000(1), mRNA: FBgn0031239, mRNA: FBgn0031239
2L mapping	267025	SNV	1	G	A	37	100	33.2973	Exon: Exon, Exon: Exon, Gene: FBgn0031238, Gene: FBgn0031239, Misc. feature: contig 2L_1_6 1..50000(1), mRNA: FBgn0031239, mRNA: FBgn0031239
2L mapping	267801	SNV	1	A	T	31	100	34.2903	Gene: FBgn0031238, Misc. feature: contig 2L_1_6 1..50000(1)
2L mapping	267804	SNV	1	G	A	32	93.75	35.7	Gene: FBgn0031238, Misc. feature: contig 2L_1_6 1..50000(1)
2L mapping	269487	SNV	1	T	C	31	100	34.5484	CDS: FBgn0031240, Exon: Exon, Gene: FBgn0031238, Gene: FBgn0031240, Misc. feature: contig 2L_1_6 1..50000(1), mRNA: FBgn0031240	FBpp0077786:c.228T>C
2L mapping	271809	SNV	1	G	A	33	100	34.4242	Misc. feature: contig 2L_1_6 1..50000(1)
2L mapping	271841	SNV	1	T	G	41	60.9756	35.76	Misc. feature: contig 2L_1_6 1..50000(1)
2L mapping	271852	Deletion	3	AAC	-	21	80.9524	36.7647	Misc. feature: contig 2L_1_6 1..50000(1)
2L mapping	271931	SNV	1	T	C	28	100	33.9643	Exon: Exon, Gene: FBgn0086912, Misc. feature: contig 2L_1_6 1..50000(1), mRNA: FBgn0086912
2L mapping	271945	SNV	1	T	C	28	100	36	Exon: Exon, Gene: FBgn0086912, Misc. feature: contig 2L_1_6 1..50000(1), mRNA: FBgn0086912
2L mapping	271997	SNV	1	A	G	27	100	35.4444	CDS: FBgn0086912, Exon: Exon, Gene: FBgn0086912, Misc. feature: contig 2L_1_6 1..50000(1), mRNA: FBgn0086912	FBpp0077798:c.1590T>C
2L mapping	272069	SNV	1	A	C	24	100	33.3333	CDS: FBgn0086912, Exon: Exon, Gene: FBgn0086912, Misc. feature: contig 2L_1_6 1..50000(1), mRNA: FBgn0086912	FBpp0077798:c.1518T>G	FBpp0077798:p.Ser506Arg
2L mapping	272154	SNV	1	T	C	18	100	36.1111	CDS: FBgn0086912, Exon: Exon, Gene: FBgn0086912, Misc. feature: contig 2L_1_6 1..50000(1), mRNA: FBgn0086912	FBpp0077798:c.1433A>G	FBpp0077798:p.Glu478Gly
2L mapping	272822	SNV	1	A	G	28	100	33.6071	CDS: FBgn0086912, Exon: Exon, Gene: FBgn0086912, Misc. feature: contig 2L_1_6 1..50000(1), mRNA: FBgn0086912	FBpp0077798:c.813T>C
2L mapping	272868	SNV	1	A	G	29	100	35.5862	CDS: FBgn0086912, Exon: Exon, Gene: FBgn0086912, Misc. feature: contig 2L_1_6 1..50000(1), mRNA: FBgn0086912	FBpp0077798:c.767T>C	FBpp0077798:p.Val256Ala
2L mapping	272958	SNV	1	T	C	38	100	34.6053	CDS: FBgn0086912, Exon: Exon, Gene: FBgn0086912, Misc. feature: contig 2L_1_6 1..50000(1), mRNA: FBgn0086912	FBpp0077798:c.677A>G	FBpp0077798:p.Lys226Arg
2L mapping	274249	SNV	1	T	G	33	100	36.4545	CDS: FBgn0086856, CDS: FBgn0086856, Exon: Exon, Exon: Exon, Gene: FBgn0086856, Misc. feature: contig 2L_1_6 1..50000(1), mRNA: FBgn0086856, mRNA: FBgn0086856	FBpp0077787:c.[264T>G]; FBpp0310342:c.[264T>G]
2L mapping	275057	SNV	1	C	A	36	100	34.6111	CDS: FBgn0086855, CDS: FBgn0086855, CDS: FBgn0086855, CDS: FBgn0086855, Exon: Exon, Gene: FBgn0086855, Misc. feature: contig 2L_1_6 1..50000(1), mRNA: FBgn0086855, mRNA: FBgn0086855, mRNA: FBgn0086855, mRNA: FBgn0086855	FBpp0303498:c.[1717G>T]; FBpp0290028:c.[1723G>T]; FBpp0303500:c.[1723G>T]; FBpp0303499:c.[1708G>T]	FBpp0303498:p.[Val573Phe]; FBpp0290028:p.[Val575Phe]; FBpp0303500:p.[Val575Phe]; FBpp0303499:p.[Val570Phe]
2L mapping	275743	SNV	1	T	G	32	100	34.6875	CDS: FBgn0086855, CDS: FBgn0086855, CDS: FBgn0086855, CDS: FBgn0086855, Exon: Exon, Gene: FBgn0086855, Misc. feature: contig 2L_1_6 1..50000(1), mRNA: FBgn0086855, mRNA: FBgn0086855, mRNA: FBgn0086855, mRNA: FBgn0086855	FBpp0290028:c.[1104A>C]; FBpp0303498:c.[1098A>C]; FBpp0303500:c.[1104A>C]; FBpp0303499:c.[1089A>C]
2L mapping	276598	SNV	1	A	G	35	100	34.5143	Gene: FBgn0086855, Misc. feature: contig 2L_1_6 1..50000(1)	FBpp0303499:c.[335-101T>C]; FBpp0303498:c.[344-101T>C]; FBpp0303500:c.[350-101T>C]; FBpp0290028:c.[350-101T>C]
2L mapping	276655	SNV	1	T	G	45	100	33.3556	Gene: FBgn0086855, Misc. feature: contig 2L_1_6 1..50000(1)	FBpp0303499:c.[334+84A>C]; FBpp0290028:c.[349+84A>C]; FBpp0303498:c.[343+84A>C]; FBpp0303500:c.[349+84A>C]
2L mapping	276931	SNV	1	T	C	38	100	35.9211	Gene: FBgn0086855, Misc. feature: contig 2L_1_6 1..50000(1)	FBpp0303498:c.[184+28A>G]; FBpp0303500:c.[184+28A>G]; FBpp0290028:c.[184+28A>G]; FBpp0303499:c.[170-28A>G]
2L mapping	277649	Deletion	1	T	-	23	91.3043	30.5238	Exon: Exon, Exon: Exon, Gene: FBgn0086855, Gene: FBgn0003444, Misc. feature: contig 2L_1_6 1..50000(1), mRNA: FBgn0086855, mRNA: FBgn0003444
2L mapping	277662	Insertion	1	-	T	23	56.5217	34.8462	Exon: Exon, Exon: Exon, Gene: FBgn0086855, Gene: FBgn0003444, Misc. feature: contig 2L_1_6 1..50000(1), mRNA: FBgn0086855, mRNA: FBgn0003444
2L mapping	278207	SNV	1	C	G	41	100	34.5366	CDS: FBgn0003444, Exon: Exon, Exon: Exon, Gene: FBgn0086855, Gene: FBgn0003444, Misc. feature: contig 2L_1_6 1..50000(1), mRNA: FBgn0086855, mRNA: FBgn0003444	FBpp0077788:c.316C>G	FBpp0077788:p.Pro106Ala
2L mapping	278355	SNV	1	A	T	38	97.3684	35.2162	Gene: FBgn0003444, Misc. feature: contig 2L_1_6 1..50000(1)	FBpp0077788:c.432+32A>T
2L mapping	278514	SNV	1	T	A	37	100	34.0541	Gene: FBgn0003444, Misc. feature: contig 2L_1_6 1..50000(1)	FBpp0077788:c.433-129T>A
2L mapping	281271	SNV	1	C	T	45	100	34.6222	CDS: FBgn0003444, Exon: Exon, Gene: FBgn0003444, Misc. feature: contig 2L_1_6 1..50000(1), mRNA: FBgn0003444	FBpp0077788:c.2868C>T
2L mapping	282415	SNV	1	T	G	37	100	34.9459	CDS: FBgn0031244, CDS: FBgn0031244, CDS: FBgn0031244, Exon: Exon, Exon: Exon, Gene: FBgn0031244, Misc. feature: contig 2L_1_6 1..50000(1), mRNA: FBgn0031244, mRNA: FBgn0031244, mRNA: FBgn0031244	FBpp0077796:c.[585A>C]; FBpp0310345:c.[585A>C]; FBpp0310344:c.[585A>C]
2L mapping	283681	SNV	1	T	G	42	100	34.8095	Exon: Exon, Exon: Exon, Gene: FBgn0031245, Misc. feature: contig 2L_1_6 1..50000(1), mRNA: FBgn0031245, mRNA: FBgn0031245, mRNA: FBgn0031245, mRNA: FBgn0031245
2L mapping	284703	SNV	1	A	C	41	100	35.8537	Gene: FBgn0031245, Misc. feature: contig 2L_1_6 1..50000(1)	FBpp0111922:c.[419+45T>G]; FBpp0077794:c.[413+45T>G]; FBpp0310343:c.[419+45T>G]; FBpp0077795:c.[422+45T>G]
2L mapping	284882	SNV	1	A	C	42	100	33.8571	CDS: FBgn0031245, CDS: FBgn0031245, CDS: FBgn0031245, CDS: FBgn0031245, Exon: Exon, Gene: FBgn0031245, Misc. feature: contig 2L_1_6 1..50000(1), mRNA: FBgn0031245, mRNA: FBgn0031245, mRNA: FBgn0031245, mRNA: FBgn0031245	FBpp0077794:c.[279T>G]; FBpp0077795:c.[288T>G]; FBpp0310343:c.[285T>G]; FBpp0111922:c.[285T>G]
2L mapping	285011	SNV	1	A	T	37	100	35.8649	Gene: FBgn0031245, Misc. feature: contig 2L_1_6 1..50000(1)	FBpp0077795:c.[202-43T>A]; FBpp0310343:c.[199-43T>A]; FBpp0111922:c.[199-43T>A]; FBpp0077794:c.[193-43T>A]
2L mapping	285056	SNV	1	C	T	32	100	34.6562	Gene: FBgn0031245, Misc. feature: contig 2L_1_6 1..50000(1)	FBpp0077794:c.[193-88G>A]; FBpp0077795:c.[202-88G>A]; FBpp0310343:c.[199-88G>A]; FBpp0111922:c.[199-88G>A]
2L mapping	287152	Insertion	4	-	ATTG	47	70.2128	35.3485	Gene: FBgn0031245, Misc. feature: contig 2L_1_6 1..50000(1)	FBpp0111922:c.[199-2184_199-2183insCAAT]; FBpp0310343:c.[199-2184_199-2183insCAAT]
2L mapping	287226	SNV	1	T	A	33	100	34.9697	Gene: FBgn0031245, Misc. feature: contig 2L_1_6 1..50000(1)	FBpp0111922:c.[199-2258A>T]; FBpp0310343:c.[199-2258A>T]
2L mapping	287763	SNV	1	A	C	22	100	36	CDS: FBgn0025686, CDS: FBgn0025686, Exon: Exon, Exon: Exon, Gene: FBgn0031245, Gene: FBgn0025686, Misc. feature: contig 2L_1_6 1..50000(1), mRNA: FBgn0025686, mRNA: FBgn0025686	FBpp0077793:c.[1157T>G]; FBpp0303497:c.[1157T>G]; FBpp0310343:c.[199-2795T>G]; FBpp0111922:c.[199-2795T>G]	FBpp0077793:p.[Leu386Arg]; FBpp0303497:p.[Leu386Arg]
2L mapping	292048	SNV	1	G	A	34	100	35.9706	Misc. feature: contig 2L_1_6 1..50000(1)
2L mapping	292130	SNV	1	T	A	26	100	36.1538	Misc. feature: contig 2L_1_6 1..50000(1)
2L mapping	292146	Deletion	1	T	-	27	100	34.8889	Misc. feature: contig 2L_1_6 1..50000(1)
2L mapping	292149	Deletion	2	AA	-	27	96.2963	33.6538	Misc. feature: contig 2L_1_6 1..50000(1)
2L mapping	292255	SNV	1	G	A	41	100	36.561	Misc. feature: contig 2L_1_6 1..50000(1)
2L mapping	292759	SNV	1	A	G	44	100	36.5909	CDS: FBgn0031247, Exon: Exon, Gene: FBgn0031247, Misc. feature: contig 2L_1_6 1..50000(1), mRNA: FBgn0031247	FBpp0077789:c.135A>G
2L mapping	292941	SNV	1	G	T	34	97.0588	33.8182	CDS: FBgn0031247, Exon: Exon, Gene: FBgn0031247, Misc. feature: contig 2L_1_6 1..50000(1), mRNA: FBgn0031247	FBpp0077789:c.317G>T	FBpp0077789:p.Arg106Ile
2L mapping	293132	SNV	1	C	A	26	100	35.6154	Exon: Exon, Exon: Exon, Gene: FBgn0031247, Gene: FBgn0017457, Misc. feature: contig 2L_1_6 1..50000(1), mRNA: FBgn0031247, mRNA: FBgn0017457
2L mapping	293209	SNV	1	C	A	31	96.7742	35.7	Exon: Exon, Exon: Exon, Gene: FBgn0031247, Gene: FBgn0017457, Misc. feature: contig 2L_1_6 1..50000(1), mRNA: FBgn0031247, mRNA: FBgn0017457
2L mapping	293279	SNV	1	G	A	34	100	35.1176	Exon: Exon, Gene: FBgn0017457, Misc. feature: contig 2L_1_6 1..50000(1), mRNA: FBgn0017457
2L mapping	293286	SNV	1	G	A	34	100	34.0588	Exon: Exon, Gene: FBgn0017457, Misc. feature: contig 2L_1_6 1..50000(1), mRNA: FBgn0017457
2L mapping	293446	Insertion	3	-	GGT	24	70.8333	32.4706	Exon: Exon, Exon: Exon, Gene: FBgn0017457, Misc. feature: contig 2L_1_6 1..50000(1), mRNA: FBgn0017457, mRNA: FBgn0017457
2L mapping	293554	SNV	1	T	A	25	100	35.88	Exon: Exon, Exon: Exon, Gene: FBgn0017457, Misc. feature: contig 2L_1_6 1..50000(1), mRNA: FBgn0017457, mRNA: FBgn0017457
2L mapping	294711	SNV	1	T	A	49	100	34.8571	Misc. feature: contig 2L_1_6 1..50000(1)
2L mapping	294769	Deletion	8	AATATGCT	-	34	67.6471	33.2174	Misc. feature: contig 2L_1_6 1..50000(1)
2L mapping	294816	SNV	1	G	C	43	100	32.4419	Misc. feature: contig 2L_1_6 1..50000(1)
2L mapping	294903	SNV	1	A	T	42	100	33.0714	Misc. feature: contig 2L_1_6 1..50000(1)
2L mapping	294915	SNV	1	T	C	32	100	33.4688	Misc. feature: contig 2L_1_6 1..50000(1)
2L mapping	294926	Replacement	3	ATA	C	25	96	32.5556	Misc. feature: contig 2L_1_6 1..50000(1)
2L mapping	295003	Insertion	1	-	T	41	100	34.2927	Misc. feature: contig 2L_1_6 1..50000(1)
2L mapping	295004	MNV	2	TT	AA	41	100	34.8293	Misc. feature: contig 2L_1_6 1..50000(1)
2L mapping	295012	MNV	2	AG	CA	44	97.7273	34.8488	Misc. feature: contig 2L_1_6 1..50000(1)
2L mapping	295741	SNV	1	A	G	23	100	35.0435	CDS: FBgn0024352, Exon: Exon, Gene: FBgn0024352, Misc. feature: contig 2L_1_6 1..50000(1), mRNA: FBgn0024352	FBpp0077790:c.330A>G
2L mapping	296890	SNV	1	G	A	45	100	34.2222	Gene: FBgn0024352, Misc. feature: contig 2L_1_6 1..50000(1)	FBpp0077790:c.1400+79G>A
2L mapping	300026	SNV	1	A	C	32	100	35.1875	Gene: FBgn0020622, Misc. feature: contig 2L_1_7 1..50000(1)	FBpp0303632:c.[857+108A>C]; FBpp0303635:c.[857+108A>C]
2L mapping	300273	MNV	2	CC	GT	28	100	33.9643	Gene: FBgn0020622, Misc. feature: contig 2L_1_7 1..50000(1)	FBpp0303632:c.[857+355_857+356delCCinsGT]; FBpp0303635:c.[857+355_857+356delCCinsGT]
2L mapping	300437	SNV	1	C	A	33	100	34.697	Gene: FBgn0020622, Misc. feature: contig 2L_1_7 1..50000(1)	FBpp0303632:c.[857+519C>A]; FBpp0303635:c.[857+519C>A]
2L mapping	300522	SNV	1	A	T	25	100	35.12	Gene: FBgn0020622, Misc. feature: contig 2L_1_7 1..50000(1)	FBpp0303635:c.[857+604A>T]; FBpp0303632:c.[857+604A>T]
2L mapping	300732	Deletion	11	CCGATCTCTAT	-	22	45.4545	34.3	Gene: FBgn0020622, Misc. feature: contig 2L_1_7 1..50000(1)	FBpp0303632:c.[857+814_857+824delCCGATCTCTAT]; FBpp0303635:c.[857+814_857+824delCCGATCTCTAT]
2L mapping	301009	SNV	1	G	T	37	97.2973	35.0556	Gene: FBgn0020622, Misc. feature: contig 2L_1_7 1..50000(1)	FBpp0303635:c.[858-1017G>T]; FBpp0303632:c.[858-1017G>T]
2L mapping	301191	SNV	1	T	C	20	100	34.95	Gene: FBgn0020622, Misc. feature: contig 2L_1_7 1..50000(1)	FBpp0303632:c.[858-835T>C]; FBpp0303635:c.[858-835T>C]
2L mapping	302772	SNV	1	A	G	39	100	33.9744	Exon: Exon, Exon: Exon, Exon: Exon, Exon: Exon, Gene: FBgn0020622, Misc. feature: contig 2L_1_7 1..50000(1), mRNA: FBgn0020622, mRNA: FBgn0020622, mRNA: FBgn0020622, mRNA: FBgn0020622
2L mapping	302795	MNV	2	TT	AC	48	97.9167	34.4255	Exon: Exon, Exon: Exon, Exon: Exon, Exon: Exon, Gene: FBgn0020622, Misc. feature: contig 2L_1_7 1..50000(1), mRNA: FBgn0020622, mRNA: FBgn0020622, mRNA: FBgn0020622, mRNA: FBgn0020622
2L mapping	302879	Insertion	1	-	T	37	81.0811	31	Exon: Exon, Exon: Exon, Exon: Exon, Exon: Exon, Gene: FBgn0020622, Misc. feature: contig 2L_1_7 1..50000(1), mRNA: FBgn0020622, mRNA: FBgn0020622, mRNA: FBgn0020622, mRNA: FBgn0020622
2L mapping	302939	SNV	1	C	G	39	100	35.1538	Exon: Exon, Exon: Exon, Exon: Exon, Exon: Exon, Gene: FBgn0020622, Misc. feature: contig 2L_1_7 1..50000(1), mRNA: FBgn0020622, mRNA: FBgn0020622, mRNA: FBgn0020622, mRNA: FBgn0020622
2L mapping	303019	SNV	1	C	T	49	100	35.449	Exon: Exon, Exon: Exon, Exon: Exon, Exon: Exon, Gene: FBgn0020622, Misc. feature: contig 2L_1_7 1..50000(1), mRNA: FBgn0020622, mRNA: FBgn0020622, mRNA: FBgn0020622, mRNA: FBgn0020622
2L mapping	303433	SNV	1	C	T	36	100	35.75	Exon: Exon, Exon: Exon, Exon: Exon, Exon: Exon, Gene: FBgn0020622, Misc. feature: contig 2L_1_7 1..50000(1), mRNA: FBgn0020622, mRNA: FBgn0020622, mRNA: FBgn0020622, mRNA: FBgn0020622
2L mapping	303935	Deletion	1	A	-	24	37.5	22.6667	Exon: Exon, Exon: Exon, Exon: Exon, Gene: FBgn0020622, Misc. feature: contig 2L_1_7 1..50000(1), mRNA: FBgn0020622, mRNA: FBgn0020622, mRNA: FBgn0020622
2L mapping	305149	SNV	1	A	G	35	97.1429	35	Exon: Exon, Exon: Exon, Exon: Exon, Gene: FBgn0020622, Misc. feature: contig 2L_1_7 1..50000(1), mRNA: FBgn0020622, mRNA: FBgn0020622, mRNA: FBgn0020622
2L mapping	306010	SNV	1	T	A	29	100	31.6552	Exon: Exon, Gene: FBgn0004611, Misc. feature: contig 2L_1_7 1..50000(1), mRNA: FBgn0004611, mRNA: FBgn0004611, mRNA: FBgn0004611
2L mapping	306086	SNV	1	G	A	30	100	31.8333	Exon: Exon, Gene: FBgn0004611, Misc. feature: contig 2L_1_7 1..50000(1), mRNA: FBgn0004611, mRNA: FBgn0004611, mRNA: FBgn0004611
2L mapping	306131	Insertion	2	-	AA	25	52	35.6538	Exon: Exon, Gene: FBgn0004611, Misc. feature: contig 2L_1_7 1..50000(1), mRNA: FBgn0004611, mRNA: FBgn0004611, mRNA: FBgn0004611
2L mapping	306159	SNV	1	A	T	22	100	33.5	Exon: Exon, Gene: FBgn0004611, Misc. feature: contig 2L_1_7 1..50000(1), mRNA: FBgn0004611, mRNA: FBgn0004611, mRNA: FBgn0004611
2L mapping	306420	SNV	1	T	G	29	96.5517	34.7143	Gene: FBgn0004611, Misc. feature: contig 2L_1_7 1..50000(1)
2L mapping	307048	SNV	1	A	G	30	100	36.0667	Gene: FBgn0004611, Misc. feature: contig 2L_1_7 1..50000(1)
2L mapping	307146	SNV	1	G	A	21	100	33.7143	Gene: FBgn0004611, Misc. feature: contig 2L_1_7 1..50000(1)
2L mapping	307451	Insertion	1	-	C	11	36.3636	33.5	Gene: FBgn0004611, Misc. feature: contig 2L_1_7 1..50000(1)
2L mapping	307471	SNV	1	T	C	13	100	34.9231	Gene: FBgn0004611, Misc. feature: contig 2L_1_7 1..50000(1)
2L mapping	310302	SNV	1	C	A	30	100	35.9667	Exon: Exon, Gene: FBgn0004611, Misc. feature: contig 2L_1_7 1..50000(1), mRNA: FBgn0004611, mRNA: FBgn0004611, mRNA: FBgn0004611
2L mapping	310715	SNV	1	T	C	24	100	34.6667	Gene: FBgn0004611, Misc. feature: contig 2L_1_7 1..50000(1)
2L mapping	311316	SNV	1	T	A	40	100	34.4	Gene: FBgn0004611, Misc. feature: contig 2L_1_7 1..50000(1)
2L mapping	311511	SNV	1	C	T	35	94.2857	36.0303	Gene: FBgn0004611, Misc. feature: contig 2L_1_7 1..50000(1)
2L mapping	311559	SNV	1	A	T	43	100	36.1395	Gene: FBgn0004611, Misc. feature: contig 2L_1_7 1..50000(1)
2L mapping	312064	SNV	1	A	C	33	100	31.8182	Gene: FBgn0004611, Misc. feature: contig 2L_1_7 1..50000(1)
2L mapping	312971	SNV	1	T	C	41	100	35.6098	Gene: FBgn0004611, Misc. feature: contig 2L_1_7 1..50000(1)
2L mapping	313620	SNV	1	C	T	34	100	34	Gene: FBgn0004611, Misc. feature: contig 2L_1_7 1..50000(1)
2L mapping	313656	SNV	1	T	C	25	100	33.88	Gene: FBgn0004611, Misc. feature: contig 2L_1_7 1..50000(1)
2L mapping	313826	SNV	1	G	T	23	95.6522	34.4545	Gene: FBgn0004611, Misc. feature: contig 2L_1_7 1..50000(1)
2L mapping	313947	Insertion	1	-	A	27	77.7778	32.4762	Gene: FBgn0004611, Misc. feature: contig 2L_1_7 1..50000(1)
2L mapping	314200	SNV	1	T	C	25	100	35.2	Gene: FBgn0004611, Misc. feature: contig 2L_1_7 1..50000(1)
2L mapping	314218	Deletion	1	T	-	23	95.6522	32	Gene: FBgn0004611, Misc. feature: contig 2L_1_7 1..50000(1)
2L mapping	314410	SNV	1	A	G	24	100	35.5417	Gene: FBgn0004611, Misc. feature: contig 2L_1_7 1..50000(1)
2L mapping	314425	MNV	2	GG	TT	26	100	36.4615	Gene: FBgn0004611, Misc. feature: contig 2L_1_7 1..50000(1)
2L mapping	314440	Deletion	1	G	-	31	87.0968	34.3704	Gene: FBgn0004611, Misc. feature: contig 2L_1_7 1..50000(1)
2L mapping	314601	SNV	1	T	A	29	100	34.3103	Gene: FBgn0004611, Misc. feature: contig 2L_1_7 1..50000(1)
2L mapping	314638	SNV	1	C	T	32	100	36.1875	Gene: FBgn0004611, Misc. feature: contig 2L_1_7 1..50000(1)
2L mapping	316074	SNV	1	T	C	25	100	34.56	Gene: FBgn0004611, Misc. feature: contig 2L_1_7 1..50000(1)
2L mapping	316664	SNV	1	A	C	32	100	32.9062	Gene: FBgn0004611, Misc. feature: contig 2L_1_7 1..50000(1)
2L mapping	317683	SNV	1	A	T	31	100	34.8065	Gene: FBgn0004611, Misc. feature: contig 2L_1_7 1..50000(1)
2L mapping	318262	SNV	1	G	T	41	97.561	34.95	Gene: FBgn0004611, Misc. feature: contig 2L_1_7 1..50000(1)	FBpp0089225:c.[93+142G>T]; FBpp0077711:c.[93+142G>T]; FBpp0303523:c.[93+142G>T]; FBpp0089226:c.[93+142G>T]; FBpp0303524:c.[93+142G>T]; FBpp0077710:c.[93+142G>T]
2L mapping	318347	SNV	1	A	C	32	100	34.0938	Gene: FBgn0004611, Misc. feature: contig 2L_1_7 1..50000(1)	FBpp0089226:c.[93+227A>C]; FBpp0089225:c.[93+227A>C]; FBpp0303523:c.[93+227A>C]; FBpp0077711:c.[93+227A>C]; FBpp0077710:c.[93+227A>C]; FBpp0303524:c.[93+227A>C]
2L mapping	318650	SNV	1	T	G	25	96	35.6667	CDS: FBgn0031248, Exon: Exon, Gene: FBgn0004611, Gene: FBgn0031248, Misc. feature: contig 2L_1_7 1..50000(1), mRNA: FBgn0031248	FBpp0077758:c.[584A>C]; FBpp0089225:c.[93+530T>G]; FBpp0303524:c.[93+530T>G]; FBpp0303523:c.[93+530T>G]; FBpp0077710:c.[93+530T>G]; FBpp0077711:c.[93+530T>G]; FBpp0089226:c.[93+530T>G]	FBpp0077758:p.Asn195Thr
2L mapping	318906	SNV	1	C	T	28	100	34.0357	CDS: FBgn0031248, Exon: Exon, Gene: FBgn0004611, Gene: FBgn0031248, Misc. feature: contig 2L_1_7 1..50000(1), mRNA: FBgn0031248	FBpp0077758:c.[328G>A]; FBpp0303523:c.[93+786C>T]; FBpp0089226:c.[93+786C>T]; FBpp0089225:c.[93+786C>T]; FBpp0303524:c.[93+786C>T]; FBpp0077710:c.[93+786C>T]; FBpp0077711:c.[93+786C>T]	FBpp0077758:p.Gly110Ser
2L mapping	319548	SNV	1	G	T	27	100	34.8519	Gene: FBgn0004611, Misc. feature: contig 2L_1_7 1..50000(1)	FBpp0077711:c.[93+1428G>T]; FBpp0077710:c.[93+1428G>T]; FBpp0089225:c.[93+1428G>T]; FBpp0089226:c.[93+1428G>T]; FBpp0303523:c.[93+1428G>T]; FBpp0303524:c.[93+1428G>T]
2L mapping	319570	SNV	1	A	G	30	100	34.7333	Gene: FBgn0004611, Misc. feature: contig 2L_1_7 1..50000(1)	FBpp0303524:c.[93+1450A>G]; FBpp0077710:c.[93+1450A>G]; FBpp0089225:c.[93+1450A>G]; FBpp0077711:c.[93+1450A>G]; FBpp0303523:c.[93+1450A>G]; FBpp0089226:c.[93+1450A>G]
2L mapping	319697	SNV	1	A	C	41	100	34.439	Gene: FBgn0004611, Misc. feature: contig 2L_1_7 1..50000(1)	FBpp0089225:c.[93+1577A>C]; FBpp0303523:c.[93+1577A>C]; FBpp0077710:c.[93+1577A>C]; FBpp0089226:c.[93+1577A>C]; FBpp0303524:c.[93+1577A>C]; FBpp0077711:c.[93+1577A>C]
2L mapping	321394	SNV	1	T	C	34	100	33.0588	Gene: FBgn0004611, Misc. feature: contig 2L_1_7 1..50000(1)	FBpp0077710:c.[93+3274T>C]; FBpp0303523:c.[93+3274T>C]; FBpp0089226:c.[93+3274T>C]; FBpp0077711:c.[93+3274T>C]; FBpp0303524:c.[93+3274T>C]; FBpp0089225:c.[93+3274T>C]
2L mapping	321801	SNV	1	T	G	41	100	34.4878	Gene: FBgn0004611, Misc. feature: contig 2L_1_7 1..50000(1)	FBpp0077711:c.[93+3681T>G]; FBpp0089225:c.[93+3681T>G]; FBpp0077710:c.[93+3681T>G]; FBpp0089226:c.[93+3681T>G]; FBpp0303524:c.[93+3681T>G]; FBpp0303523:c.[93+3681T>G]
2L mapping	321810	SNV	1	A	G	41	100	35.3171	Gene: FBgn0004611, Misc. feature: contig 2L_1_7 1..50000(1)	FBpp0077710:c.[93+3690A>G]; FBpp0089225:c.[93+3690A>G]; FBpp0089226:c.[93+3690A>G]; FBpp0303523:c.[93+3690A>G]; FBpp0303524:c.[93+3690A>G]; FBpp0077711:c.[93+3690A>G]
2L mapping	321886	SNV	1	G	A	30	100	33.1667	Gene: FBgn0004611, Misc. feature: contig 2L_1_7 1..50000(1)	FBpp0089225:c.[93+3766G>A]; FBpp0077710:c.[93+3766G>A]; FBpp0077711:c.[93+3766G>A]; FBpp0303524:c.[93+3766G>A]; FBpp0303523:c.[93+3766G>A]; FBpp0089226:c.[93+3766G>A]
2L mapping	321888	SNV	1	G	T	30	100	34.9	Gene: FBgn0004611, Misc. feature: contig 2L_1_7 1..50000(1)	FBpp0077710:c.[93+3768G>T]; FBpp0077711:c.[93+3768G>T]; FBpp0089225:c.[93+3768G>T]; FBpp0303524:c.[93+3768G>T]; FBpp0303523:c.[93+3768G>T]; FBpp0089226:c.[93+3768G>T]
2L mapping	321894	SNV	1	G	C	32	96.875	34.1613	Gene: FBgn0004611, Misc. feature: contig 2L_1_7 1..50000(1)	FBpp0077711:c.[93+3774G>C]; FBpp0089226:c.[93+3774G>C]; FBpp0089225:c.[93+3774G>C]; FBpp0303523:c.[93+3774G>C]; FBpp0303524:c.[93+3774G>C]; FBpp0077710:c.[93+3774G>C]
2L mapping	321917	SNV	1	T	C	35	100	35.9714	Gene: FBgn0004611, Misc. feature: contig 2L_1_7 1..50000(1)	FBpp0303523:c.[94-3761T>C]; FBpp0077711:c.[94-3761T>C]; FBpp0077710:c.[94-3761T>C]; FBpp0089225:c.[94-3761T>C]; FBpp0089226:c.[94-3761T>C]; FBpp0303524:c.[94-3761T>C]
2L mapping	321953	SNV	1	C	G	33	100	34.4848	Gene: FBgn0004611, Misc. feature: contig 2L_1_7 1..50000(1)	FBpp0089225:c.[94-3725C>G]; FBpp0303523:c.[94-3725C>G]; FBpp0089226:c.[94-3725C>G]; FBpp0077710:c.[94-3725C>G]; FBpp0303524:c.[94-3725C>G]; FBpp0077711:c.[94-3725C>G]
2L mapping	322370	SNV	1	C	T	33	100	35.6061	CDS: FBgn0053127, Exon: Exon, Gene: FBgn0004611, Gene: FBgn0053127, Misc. feature: contig 2L_1_7 1..50000(1), mRNA: FBgn0053127	FBpp0089225:c.[94-3308C>T]; FBpp0077712:c.[240C>T]; FBpp0077711:c.[94-3308C>T]; FBpp0089226:c.[94-3308C>T]; FBpp0303523:c.[94-3308C>T]; FBpp0303524:c.[94-3308C>T]; FBpp0077710:c.[94-3308C>T]
2L mapping	322504	SNV	1	C	A	26	100	33.6538	CDS: FBgn0053127, Exon: Exon, Gene: FBgn0004611, Gene: FBgn0053127, Misc. feature: contig 2L_1_7 1..50000(1), mRNA: FBgn0053127	FBpp0089225:c.[94-3174C>A]; FBpp0077712:c.[374C>A]; FBpp0089226:c.[94-3174C>A]; FBpp0303524:c.[94-3174C>A]; FBpp0077710:c.[94-3174C>A]; FBpp0303523:c.[94-3174C>A]; FBpp0077711:c.[94-3174C>A]	FBpp0077712:p.Thr125Lys
2L mapping	323052	SNV	1	C	A	28	100	32.8214	Exon: Exon, Gene: FBgn0004611, Gene: FBgn0053127, Misc. feature: contig 2L_1_7 1..50000(1), mRNA: FBgn0053127	FBpp0077711:c.[94-2626C>A]; FBpp0089226:c.[94-2626C>A]; FBpp0303524:c.[94-2626C>A]; FBpp0089225:c.[94-2626C>A]; FBpp0077710:c.[94-2626C>A]; FBpp0303523:c.[94-2626C>A]
2L mapping	323155	SNV	1	A	G	39	97.4359	34.8421	Gene: FBgn0004611, Misc. feature: contig 2L_1_7 1..50000(1)	FBpp0089226:c.[94-2523A>G]; FBpp0303523:c.[94-2523A>G]; FBpp0303524:c.[94-2523A>G]; FBpp0077710:c.[94-2523A>G]; FBpp0077711:c.[94-2523A>G]; FBpp0089225:c.[94-2523A>G]
2L mapping	323195	SNV	1	C	G	32	100	33.5	Gene: FBgn0004611, Misc. feature: contig 2L_1_7 1..50000(1)	FBpp0303523:c.[94-2483C>G]; FBpp0077710:c.[94-2483C>G]; FBpp0077711:c.[94-2483C>G]; FBpp0089225:c.[94-2483C>G]; FBpp0303524:c.[94-2483C>G]; FBpp0089226:c.[94-2483C>G]
2L mapping	323313	Replacement	5	TTCCT	G	14	100	35.0857	Gene: FBgn0004611, Misc. feature: contig 2L_1_7 1..50000(1)	FBpp0089225:c.[94-2365_94-2361delTTCCTinsG]; FBpp0303523:c.[94-2365_94-2361delTTCCTinsG]; FBpp0089226:c.[94-2365_94-2361delTTCCTinsG]; FBpp0303524:c.[94-2365_94-2361delTTCCTinsG]; FBpp0077710:c.[94-2365_94-2361delTTCCTinsG]; FBpp0077711:c.[94-2365_94-2361delTTCCTinsG]
2L mapping	323319	Deletion	1	T	-	14	100	35.7143	Gene: FBgn0004611, Misc. feature: contig 2L_1_7 1..50000(1)	FBpp0077710:c.[94-2359delT]; FBpp0303524:c.[94-2359delT]; FBpp0077711:c.[94-2359delT]; FBpp0089225:c.[94-2359delT]; FBpp0089226:c.[94-2359delT]; FBpp0303523:c.[94-2359delT]
2L mapping	323321	Deletion	1	A	-	14	100	34.3571	Gene: FBgn0004611, Misc. feature: contig 2L_1_7 1..50000(1)	FBpp0089225:c.[94-2357delA]; FBpp0303524:c.[94-2357delA]; FBpp0089226:c.[94-2357delA]; FBpp0303523:c.[94-2357delA]; FBpp0077710:c.[94-2357delA]; FBpp0077711:c.[94-2357delA]
2L mapping	323345	SNV	1	T	A	31	100	35.0968	Gene: FBgn0004611, Misc. feature: contig 2L_1_7 1..50000(1)	FBpp0077710:c.[94-2333T>A]; FBpp0303524:c.[94-2333T>A]; FBpp0303523:c.[94-2333T>A]; FBpp0089225:c.[94-2333T>A]; FBpp0077711:c.[94-2333T>A]; FBpp0089226:c.[94-2333T>A]
2L mapping	323348	SNV	1	T	A	30	100	35.2667	Gene: FBgn0004611, Misc. feature: contig 2L_1_7 1..50000(1)	FBpp0303524:c.[94-2330T>A]; FBpp0303523:c.[94-2330T>A]; FBpp0077711:c.[94-2330T>A]; FBpp0089225:c.[94-2330T>A]; FBpp0089226:c.[94-2330T>A]; FBpp0077710:c.[94-2330T>A]
2L mapping	323351	Deletion	1	T	-	29	100	33.2414	Gene: FBgn0004611, Misc. feature: contig 2L_1_7 1..50000(1)	FBpp0089225:c.[94-2327delT]; FBpp0077710:c.[94-2327delT]; FBpp0303523:c.[94-2327delT]; FBpp0077711:c.[94-2327delT]; FBpp0089226:c.[94-2327delT]; FBpp0303524:c.[94-2327delT]
2L mapping	323577	SNV	1	A	G	26	100	29.8462	Gene: FBgn0004611, Misc. feature: contig 2L_1_7 1..50000(1)	FBpp0303523:c.[94-2101A>G]; FBpp0089225:c.[94-2101A>G]; FBpp0303524:c.[94-2101A>G]; FBpp0089226:c.[94-2101A>G]; FBpp0077711:c.[94-2101A>G]; FBpp0077710:c.[94-2101A>G]
2L mapping	323605	SNV	1	A	G	25	100	34.2	Gene: FBgn0004611, Misc. feature: contig 2L_1_7 1..50000(1)	FBpp0089225:c.[94-2073A>G]; FBpp0303523:c.[94-2073A>G]; FBpp0077710:c.[94-2073A>G]; FBpp0077711:c.[94-2073A>G]; FBpp0089226:c.[94-2073A>G]; FBpp0303524:c.[94-2073A>G]
2L mapping	323800	MNV	2	CC	TG	37	56.7568	35.2381	Gene: FBgn0004611, Misc. feature: contig 2L_1_7 1..50000(1)	FBpp0303524:c.[94-1878_94-1877delCCinsTG]; FBpp0089226:c.[94-1878_94-1877delCCinsTG]; FBpp0303523:c.[94-1878_94-1877delCCinsTG]; FBpp0077710:c.[94-1878_94-1877delCCinsTG]; FBpp0077711:c.[94-1878_94-1877delCCinsTG]; FBpp0089225:c.[94-1878_94-1877delCCinsTG]
2L mapping	323804	Insertion	1	-	G	21	100	35.8571	Gene: FBgn0004611, Misc. feature: contig 2L_1_7 1..50000(1)	FBpp0077711:c.[94-1875_94-1874insG]; FBpp0303523:c.[94-1875_94-1874insG]; FBpp0089226:c.[94-1875_94-1874insG]; FBpp0089225:c.[94-1875_94-1874insG]; FBpp0077710:c.[94-1875_94-1874insG]; FBpp0303524:c.[94-1875_94-1874insG]
2L mapping	323848	SNV	1	C	T	31	100	33.4194	Gene: FBgn0004611, Misc. feature: contig 2L_1_7 1..50000(1)	FBpp0303523:c.[94-1830C>T]; FBpp0077710:c.[94-1830C>T]; FBpp0303524:c.[94-1830C>T]; FBpp0089225:c.[94-1830C>T]; FBpp0077711:c.[94-1830C>T]; FBpp0089226:c.[94-1830C>T]
2L mapping	324007	SNV	1	A	C	31	100	34.9355	Gene: FBgn0004611, Misc. feature: contig 2L_1_7 1..50000(1)	FBpp0303523:c.[94-1671A>C]; FBpp0089225:c.[94-1671A>C]; FBpp0077711:c.[94-1671A>C]; FBpp0303524:c.[94-1671A>C]; FBpp0077710:c.[94-1671A>C]; FBpp0089226:c.[94-1671A>C]
2L mapping	324027	SNV	1	C	T	28	100	34.8929	Gene: FBgn0004611, Misc. feature: contig 2L_1_7 1..50000(1)	FBpp0089225:c.[94-1651C>T]; FBpp0303524:c.[94-1651C>T]; FBpp0077710:c.[94-1651C>T]; FBpp0077711:c.[94-1651C>T]; FBpp0303523:c.[94-1651C>T]; FBpp0089226:c.[94-1651C>T]
2L mapping	324338	SNV	1	A	C	31	96.7742	35.3667	Gene: FBgn0004611, Misc. feature: contig 2L_1_7 1..50000(1)	FBpp0077711:c.[94-1340A>C]; FBpp0089225:c.[94-1340A>C]; FBpp0077710:c.[94-1340A>C]; FBpp0089226:c.[94-1340A>C]; FBpp0303523:c.[94-1340A>C]; FBpp0303524:c.[94-1340A>C]
2L mapping	324753	SNV	1	C	G	42	100	34.0476	Gene: FBgn0004611, Misc. feature: contig 2L_1_7 1..50000(1)	FBpp0077710:c.[94-925C>G]; FBpp0089226:c.[94-925C>G]; FBpp0077711:c.[94-925C>G]; FBpp0303524:c.[94-925C>G]; FBpp0303523:c.[94-925C>G]; FBpp0089225:c.[94-925C>G]
2L mapping	324944	SNV	1	T	G	34	100	36.2059	Gene: FBgn0004611, Misc. feature: contig 2L_1_7 1..50000(1)	FBpp0077710:c.[94-734T>G]; FBpp0089226:c.[94-734T>G]; FBpp0089225:c.[94-734T>G]; FBpp0303523:c.[94-734T>G]; FBpp0077711:c.[94-734T>G]; FBpp0303524:c.[94-734T>G]
2L mapping	324951	SNV	1	A	C	34	100	34.8235	Gene: FBgn0004611, Misc. feature: contig 2L_1_7 1..50000(1)	FBpp0303523:c.[94-727A>C]; FBpp0077710:c.[94-727A>C]; FBpp0077711:c.[94-727A>C]; FBpp0089226:c.[94-727A>C]; FBpp0303524:c.[94-727A>C]; FBpp0089225:c.[94-727A>C]
2L mapping	325087	SNV	1	T	C	30	96.6667	34.2759	Gene: FBgn0004611, Misc. feature: contig 2L_1_7 1..50000(1)	FBpp0077711:c.[94-591T>C]; FBpp0089225:c.[94-591T>C]; FBpp0089226:c.[94-591T>C]; FBpp0303524:c.[94-591T>C]; FBpp0077710:c.[94-591T>C]; FBpp0303523:c.[94-591T>C]
2L mapping	325292	SNV	1	G	A	38	100	34.1316	Gene: FBgn0004611, Misc. feature: contig 2L_1_7 1..50000(1)	FBpp0077711:c.[94-386G>A]; FBpp0089225:c.[94-386G>A]; FBpp0303523:c.[94-386G>A]; FBpp0089226:c.[94-386G>A]; FBpp0077710:c.[94-386G>A]; FBpp0303524:c.[94-386G>A]
2L mapping	326091	SNV	1	G	C	35	100	34.6857	Gene: FBgn0004611, Gene: FBgn0264086, Misc. feature: contig 2L_1_7 1..50000(1)	FBpp0077711:c.[240+267G>C]; FBpp0089226:c.[240+267G>C]; FBpp0089225:c.[240+267G>C]; FBpp0303523:c.[240+267G>C]; FBpp0303538:c.[1034-30C>G]; FBpp0077710:c.[240+267G>C]; FBpp0303524:c.[240+267G>C]
2L mapping	326115	SNV	1	G	A	43	100	34.6047	Gene: FBgn0004611, Gene: FBgn0264086, Misc. feature: contig 2L_1_7 1..50000(1)	FBpp0077711:c.[240+291G>A]; FBpp0089226:c.[240+291G>A]; FBpp0077710:c.[240+291G>A]; FBpp0303523:c.[240+291G>A]; FBpp0303524:c.[240+291G>A]; FBpp0089225:c.[240+291G>A]; FBpp0303538:c.[1034-54C>T]
2L mapping	326145	SNV	1	G	T	41	100	34.8293	Gene: FBgn0004611, Gene: FBgn0264086, Misc. feature: contig 2L_1_7 1..50000(1)	FBpp0089226:c.[240+321G>T]; FBpp0303538:c.[1034-84C>A]; FBpp0077711:c.[240+321G>T]; FBpp0303523:c.[240+321G>T]; FBpp0077710:c.[240+321G>T]; FBpp0089225:c.[240+321G>T]; FBpp0303524:c.[240+321G>T]
2L mapping	326180	SNV	1	G	A	40	100	33.525	Gene: FBgn0004611, Gene: FBgn0264086, Misc. feature: contig 2L_1_7 1..50000(1)	FBpp0303524:c.[240+356G>A]; FBpp0077710:c.[240+356G>A]; FBpp0089226:c.[240+356G>A]; FBpp0303523:c.[240+356G>A]; FBpp0089225:c.[240+356G>A]; FBpp0303538:c.[1034-119C>T]; FBpp0077711:c.[240+356G>A]
2L mapping	326198	SNV	1	C	T	33	100	33.8182	Gene: FBgn0004611, Gene: FBgn0264086, Misc. feature: contig 2L_1_7 1..50000(1)	FBpp0303523:c.[240+374C>T]; FBpp0089226:c.[240+374C>T]; FBpp0089225:c.[240+374C>T]; FBpp0303524:c.[240+374C>T]; FBpp0077710:c.[240+374C>T]; FBpp0077711:c.[240+374C>T]; FBpp0303538:c.[1034-137G>A]
2L mapping	326244	SNV	1	C	A	33	100	35.0606	Gene: FBgn0004611, Gene: FBgn0264086, Misc. feature: contig 2L_1_7 1..50000(1)	FBpp0303523:c.[240+420C>A]; FBpp0089225:c.[240+420C>A]; FBpp0303524:c.[240+420C>A]; FBpp0089226:c.[240+420C>A]; FBpp0077710:c.[240+420C>A]; FBpp0303538:c.[1034-183G>T]; FBpp0077711:c.[240+420C>A]
2L mapping	326314	SNV	1	C	G	33	100	35.3939	Gene: FBgn0004611, Gene: FBgn0264086, Misc. feature: contig 2L_1_7 1..50000(1)	FBpp0077711:c.[240+490C>G]; FBpp0089225:c.[240+490C>G]; FBpp0303523:c.[240+490C>G]; FBpp0077710:c.[240+490C>G]; FBpp0303524:c.[240+490C>G]; FBpp0303538:c.[1034-253G>C]; FBpp0089226:c.[240+490C>G]
2L mapping	326320	Deletion	1	C	-	29	96.5517	33.8571	Gene: FBgn0004611, Gene: FBgn0264086, Misc. feature: contig 2L_1_7 1..50000(1)	FBpp0077711:c.[240+496delC]; FBpp0303523:c.[240+496delC]; FBpp0089225:c.[240+496delC]; FBpp0077710:c.[240+496delC]; FBpp0089226:c.[240+496delC]; FBpp0303538:c.[1034-259delG]; FBpp0303524:c.[240+496delC]
2L mapping	326335	SNV	1	C	G	29	100	35.5172	Gene: FBgn0004611, Gene: FBgn0264086, Misc. feature: contig 2L_1_7 1..50000(1)	FBpp0089226:c.[240+511C>G]; FBpp0303538:c.[1034-274G>C]; FBpp0303524:c.[240+511C>G]; FBpp0077710:c.[240+511C>G]; FBpp0077711:c.[240+511C>G]; FBpp0303523:c.[240+511C>G]; FBpp0089225:c.[240+511C>G]
2L mapping	326817	SNV	1	C	A	35	100	32.8571	Gene: FBgn0004611, Gene: FBgn0264086, Misc. feature: contig 2L_1_7 1..50000(1)	FBpp0089226:c.[240+993C>A]; FBpp0089225:c.[240+993C>A]; FBpp0077711:c.[240+993C>A]; FBpp0303524:c.[240+993C>A]; FBpp0077710:c.[240+993C>A]; FBpp0303523:c.[240+993C>A]; FBpp0303538:c.[1034-756G>T]
2L mapping	327018	SNV	1	A	T	37	100	32.973	Gene: FBgn0004611, Gene: FBgn0264086, Misc. feature: contig 2L_1_7 1..50000(1)	FBpp0089225:c.[240+1194A>T]; FBpp0077710:c.[240+1194A>T]; FBpp0089226:c.[240+1194A>T]; FBpp0303538:c.[1034-957T>A]; FBpp0303523:c.[240+1194A>T]; FBpp0303524:c.[240+1194A>T]; FBpp0077711:c.[240+1194A>T]
2L mapping	327023	SNV	1	G	A	37	100	35.5135	Gene: FBgn0004611, Gene: FBgn0264086, Misc. feature: contig 2L_1_7 1..50000(1)	FBpp0303538:c.[1034-962C>T]; FBpp0089226:c.[240+1199G>A]; FBpp0077711:c.[240+1199G>A]; FBpp0089225:c.[240+1199G>A]; FBpp0303524:c.[240+1199G>A]; FBpp0077710:c.[240+1199G>A]; FBpp0303523:c.[240+1199G>A]
2L mapping	327109	Deletion	4	GTAG	-	11	90.9091	35.6	Gene: FBgn0004611, Gene: FBgn0264086, Misc. feature: contig 2L_1_7 1..50000(1)	FBpp0077711:c.[240+1285_240+1288delGTAG]; FBpp0089225:c.[240+1285_240+1288delGTAG]; FBpp0303524:c.[240+1285_240+1288delGTAG]; FBpp0303523:c.[240+1285_240+1288delGTAG]; FBpp0303538:c.[1034-1051_1034-1048delCTAC]; FBpp0077710:c.[240+1285_240+1288delGTAG]; FBpp0089226:c.[240+1285_240+1288delGTAG]
2L mapping	327115	MNV	2	TG	CA	11	90.9091	35.6	Gene: FBgn0004611, Gene: FBgn0264086, Misc. feature: contig 2L_1_7 1..50000(1)	FBpp0303538:c.[1034-1055_1034-1054delCAinsTG]; FBpp0077711:c.[240+1291_240+1292delTGinsCA]; FBpp0077710:c.[240+1291_240+1292delTGinsCA]; FBpp0303523:c.[240+1291_240+1292delTGinsCA]; FBpp0303524:c.[240+1291_240+1292delTGinsCA]; FBpp0089225:c.[240+1291_240+1292delTGinsCA]; FBpp0089226:c.[240+1291_240+1292delTGinsCA]
2L mapping	327119	Deletion	3	GAG	-	11	100	35.9091	Gene: FBgn0004611, Gene: FBgn0264086, Misc. feature: contig 2L_1_7 1..50000(1)	FBpp0303523:c.[240+1295_240+1297delGAG]; FBpp0077711:c.[240+1295_240+1297delGAG]; FBpp0089225:c.[240+1295_240+1297delGAG]; FBpp0303538:c.[1034-1060_1034-1058delCTC]; FBpp0303524:c.[240+1295_240+1297delGAG]; FBpp0089226:c.[240+1295_240+1297delGAG]; FBpp0077710:c.[240+1295_240+1297delGAG]
2L mapping	327276	SNV	1	T	A	45	100	35.0222	Gene: FBgn0004611, Gene: FBgn0264086, Misc. feature: contig 2L_1_7 1..50000(1)	FBpp0077711:c.[240+1452T>A]; FBpp0303538:c.[1034-1215A>T]; FBpp0089226:c.[240+1452T>A]; FBpp0089225:c.[240+1452T>A]; FBpp0303523:c.[240+1452T>A]; FBpp0077710:c.[240+1452T>A]; FBpp0303524:c.[240+1452T>A]
2L mapping	327625	SNV	1	A	G	33	100	35.9091	CDS: FBgn0264086, Exon: Exon, Gene: FBgn0004611, Gene: FBgn0264086, Misc. feature: contig 2L_1_7 1..50000(1), mRNA: FBgn0264086	FBpp0303524:c.[240+1801A>G]; FBpp0077710:c.[240+1801A>G]; FBpp0303539:c.[1998T>C]; FBpp0089226:c.[240+1801A>G]; FBpp0303523:c.[240+1801A>G]; FBpp0303538:c.[1033+968T>C]; FBpp0077711:c.[240+1801A>G]; FBpp0089225:c.[240+1801A>G]
2L mapping	327983	SNV	1	T	C	33	100	34.0909	CDS: FBgn0264086, Exon: Exon, Gene: FBgn0004611, Gene: FBgn0264086, Misc. feature: contig 2L_1_7 1..50000(1), mRNA: FBgn0264086	FBpp0303539:c.[1640A>G]; FBpp0077710:c.[240+2159T>C]; FBpp0089226:c.[240+2159T>C]; FBpp0077711:c.[240+2159T>C]; FBpp0089225:c.[240+2159T>C]; FBpp0303538:c.[1033+610A>G]; FBpp0303523:c.[240+2159T>C]; FBpp0303524:c.[240+2159T>C]	FBpp0303539:p.Asp547Gly
2L mapping	328095	SNV	1	C	T	28	100	34.9286	CDS: FBgn0264086, Exon: Exon, Gene: FBgn0004611, Gene: FBgn0264086, Misc. feature: contig 2L_1_7 1..50000(1), mRNA: FBgn0264086	FBpp0077710:c.[240+2271C>T]; FBpp0303539:c.[1528G>A]; FBpp0077711:c.[240+2271C>T]; FBpp0089226:c.[240+2271C>T]; FBpp0303524:c.[240+2271C>T]; FBpp0089225:c.[240+2271C>T]; FBpp0303523:c.[240+2271C>T]; FBpp0303538:c.[1033+498G>A]	FBpp0303539:p.Gly510Arg
2L mapping	328259	SNV	1	C	A	27	100	35.4074	CDS: FBgn0264086, Exon: Exon, Gene: FBgn0004611, Gene: FBgn0264086, Misc. feature: contig 2L_1_7 1..50000(1), mRNA: FBgn0264086	FBpp0089226:c.[240+2435C>A]; FBpp0303539:c.[1364G>T]; FBpp0077710:c.[240+2435C>A]; FBpp0303538:c.[1033+334G>T]; FBpp0303523:c.[240+2435C>A]; FBpp0089225:c.[240+2435C>A]; FBpp0077711:c.[240+2435C>A]; FBpp0303524:c.[240+2435C>A]	FBpp0303539:p.Gly455Val
2L mapping	328283	SNV	1	C	T	23	69.5652	33.5625	CDS: FBgn0264086, Exon: Exon, Gene: FBgn0004611, Gene: FBgn0264086, Misc. feature: contig 2L_1_7 1..50000(1), mRNA: FBgn0264086	FBpp0077710:c.[240+2459C>T]; FBpp0089226:c.[240+2459C>T]; FBpp0077711:c.[240+2459C>T]; FBpp0303523:c.[240+2459C>T]; FBpp0089225:c.[240+2459C>T]; FBpp0303539:c.[1340G>A]; FBpp0303524:c.[240+2459C>T]; FBpp0303538:c.[1033+310G>A]	FBpp0303539:p.Gly447Asp
2L mapping	328285	SNV	1	T	G	25	64	35.875	CDS: FBgn0264086, Exon: Exon, Gene: FBgn0004611, Gene: FBgn0264086, Misc. feature: contig 2L_1_7 1..50000(1), mRNA: FBgn0264086	FBpp0089225:c.[240+2461T>G]; FBpp0089226:c.[240+2461T>G]; FBpp0303538:c.[1033+308A>C]; FBpp0077710:c.[240+2461T>G]; FBpp0077711:c.[240+2461T>G]; FBpp0303539:c.[1338A>C]; FBpp0303524:c.[240+2461T>G]; FBpp0303523:c.[240+2461T>G]	FBpp0303539:p.Lys446Asn
2L mapping	328292	SNV	1	A	T	12	100	34.75	CDS: FBgn0264086, Exon: Exon, Gene: FBgn0004611, Gene: FBgn0264086, Misc. feature: contig 2L_1_7 1..50000(1), mRNA: FBgn0264086	FBpp0077710:c.[240+2468A>T]; FBpp0303523:c.[240+2468A>T]; FBpp0089226:c.[240+2468A>T]; FBpp0303539:c.[1331T>A]; FBpp0089225:c.[240+2468A>T]; FBpp0303538:c.[1033+301T>A]; FBpp0303524:c.[240+2468A>T]; FBpp0077711:c.[240+2468A>T]	FBpp0303539:p.Met444Lys
2L mapping	328524	SNV	1	C	T	33	100	36.7576	CDS: FBgn0264086, Exon: Exon, Gene: FBgn0004611, Gene: FBgn0264086, Misc. feature: contig 2L_1_7 1..50000(1), mRNA: FBgn0264086	FBpp0089226:c.[240+2700C>T]; FBpp0303538:c.[1033+69G>A]; FBpp0077711:c.[240+2700C>T]; FBpp0303539:c.[1099G>A]; FBpp0303523:c.[240+2700C>T]; FBpp0303524:c.[240+2700C>T]; FBpp0089225:c.[240+2700C>T]; FBpp0077710:c.[240+2700C>T]	FBpp0303539:p.Asp367Asn
2L mapping	329350	SNV	1	T	C	30	100	34.6	CDS: FBgn0264086, CDS: FBgn0264086, Exon: Exon, Exon: Exon, Gene: FBgn0004611, Gene: FBgn0264086, Misc. feature: contig 2L_1_7 1..50000(1), mRNA: FBgn0264086, mRNA: FBgn0264086	FBpp0303539:c.[273A>G]; FBpp0089225:c.[240+3526T>C]; FBpp0077711:c.[240+3526T>C]; FBpp0303524:c.[240+3526T>C]; FBpp0303538:c.[276A>G]; FBpp0303523:c.[240+3526T>C]; FBpp0077710:c.[240+3526T>C]; FBpp0089226:c.[240+3526T>C]
2L mapping	329494	SNV	1	A	G	29	100	34.5862	CDS: FBgn0264086, CDS: FBgn0264086, Exon: Exon, Exon: Exon, Gene: FBgn0004611, Gene: FBgn0264086, Misc. feature: contig 2L_1_7 1..50000(1), mRNA: FBgn0264086, mRNA: FBgn0264086	FBpp0303524:c.[240+3670A>G]; FBpp0077711:c.[240+3670A>G]; FBpp0303538:c.[132T>C]; FBpp0303523:c.[240+3670A>G]; FBpp0077710:c.[240+3670A>G]; FBpp0089226:c.[240+3670A>G]; FBpp0303539:c.[129T>C]; FBpp0089225:c.[240+3670A>G]
2L mapping	329590	SNV	1	G	A	31	100	35.4839	CDS: FBgn0264086, CDS: FBgn0264086, Exon: Exon, Exon: Exon, Gene: FBgn0004611, Gene: FBgn0264086, Misc. feature: contig 2L_1_7 1..50000(1), mRNA: FBgn0264086, mRNA: FBgn0264086	FBpp0089226:c.[240+3766G>A]; FBpp0089225:c.[240+3766G>A]; FBpp0303523:c.[240+3766G>A]; FBpp0303524:c.[240+3766G>A]; FBpp0077711:c.[240+3766G>A]; FBpp0077710:c.[240+3766G>A]; FBpp0303538:c.[36C>T]; FBpp0303539:c.[33C>T]
2L mapping	329600	SNV	1	G	T	28	100	35.0357	CDS: FBgn0264086, CDS: FBgn0264086, Exon: Exon, Exon: Exon, Gene: FBgn0004611, Gene: FBgn0264086, Misc. feature: contig 2L_1_7 1..50000(1), mRNA: FBgn0264086, mRNA: FBgn0264086	FBpp0077711:c.[240+3776G>T]; FBpp0303539:c.[23C>A]; FBpp0303523:c.[240+3776G>T]; FBpp0089225:c.[240+3776G>T]; FBpp0089226:c.[240+3776G>T]; FBpp0303538:c.[26C>A]; FBpp0077710:c.[240+3776G>T]; FBpp0303524:c.[240+3776G>T]	FBpp0303539:p.[Pro8His]; FBpp0303538:p.[Pro9His]
2L mapping	329736	Insertion	2	-	TT	28	60.7143	34.8235	Exon: Exon, Exon: Exon, Gene: FBgn0004611, Gene: FBgn0264086, Misc. feature: contig 2L_1_7 1..50000(1), mRNA: FBgn0264086, mRNA: FBgn0264086	FBpp0303524:c.[240+3911_240+3912insTT]; FBpp0077711:c.[240+3911_240+3912insTT]; FBpp0089225:c.[240+3911_240+3912insTT]; FBpp0303523:c.[240+3911_240+3912insTT]; FBpp0089226:c.[240+3911_240+3912insTT]; FBpp0077710:c.[240+3911_240+3912insTT]
2L mapping	329839	SNV	1	A	C	27	100	34.8519	Gene: FBgn0004611, Misc. feature: contig 2L_1_7 1..50000(1)	FBpp0303524:c.[240+4015A>C]; FBpp0303523:c.[240+4015A>C]; FBpp0089226:c.[240+4015A>C]; FBpp0089225:c.[240+4015A>C]; FBpp0077711:c.[240+4015A>C]; FBpp0077710:c.[240+4015A>C]
2L mapping	329858	SNV	1	A	C	24	100	32.75	Gene: FBgn0004611, Misc. feature: contig 2L_1_7 1..50000(1)	FBpp0089225:c.[240+4034A>C]; FBpp0077711:c.[240+4034A>C]; FBpp0077710:c.[240+4034A>C]; FBpp0089226:c.[240+4034A>C]; FBpp0303524:c.[240+4034A>C]; FBpp0303523:c.[240+4034A>C]
2L mapping	329975	Insertion	1	-	A	29	65.5172	32.1579	Exon: Exon, Gene: FBgn0004611, Gene: FBgn0051921, Misc. feature: contig 2L_1_7 1..50000(1), mRNA: FBgn0051921	FBpp0303524:c.[241-4146_241-4145insA]; FBpp0077711:c.[241-4146_241-4145insA]; FBpp0089225:c.[241-4146_241-4145insA]; FBpp0077710:c.[241-4146_241-4145insA]; FBpp0089226:c.[241-4146_241-4145insA]; FBpp0303523:c.[241-4146_241-4145insA]
2L mapping	330084	SNV	1	T	A	31	100	33.7419	CDS: FBgn0051921, Exon: Exon, Gene: FBgn0004611, Gene: FBgn0051921, Misc. feature: contig 2L_1_7 1..50000(1), mRNA: FBgn0051921	FBpp0303523:c.[241-4036T>A]; FBpp0077710:c.[241-4036T>A]; FBpp0077755:c.[2049A>T]; FBpp0089226:c.[241-4036T>A]; FBpp0089225:c.[241-4036T>A]; FBpp0077711:c.[241-4036T>A]; FBpp0303524:c.[241-4036T>A]
2L mapping	330215	SNV	1	T	C	36	100	34.5833	CDS: FBgn0051921, Exon: Exon, Gene: FBgn0004611, Gene: FBgn0051921, Misc. feature: contig 2L_1_7 1..50000(1), mRNA: FBgn0051921	FBpp0089225:c.[241-3905T>C]; FBpp0089226:c.[241-3905T>C]; FBpp0303524:c.[241-3905T>C]; FBpp0077755:c.[1918A>G]; FBpp0077711:c.[241-3905T>C]; FBpp0303523:c.[241-3905T>C]; FBpp0077710:c.[241-3905T>C]	FBpp0077755:p.Ser640Gly
2L mapping	330228	SNV	1	G	A	30	100	34.2667	CDS: FBgn0051921, Exon: Exon, Gene: FBgn0004611, Gene: FBgn0051921, Misc. feature: contig 2L_1_7 1..50000(1), mRNA: FBgn0051921	FBpp0077711:c.[241-3892G>A]; FBpp0089225:c.[241-3892G>A]; FBpp0077755:c.[1905C>T]; FBpp0303523:c.[241-3892G>A]; FBpp0077710:c.[241-3892G>A]; FBpp0089226:c.[241-3892G>A]; FBpp0303524:c.[241-3892G>A]
2L mapping	331099	SNV	1	T	C	21	100	33.9524	CDS: FBgn0051921, Exon: Exon, Gene: FBgn0004611, Gene: FBgn0051921, Misc. feature: contig 2L_1_7 1..50000(1), mRNA: FBgn0051921	FBpp0077755:c.[1034A>G]; FBpp0077710:c.[241-3021T>C]; FBpp0089226:c.[241-3021T>C]; FBpp0089225:c.[241-3021T>C]; FBpp0077711:c.[241-3021T>C]; FBpp0303523:c.[241-3021T>C]; FBpp0303524:c.[241-3021T>C]	FBpp0077755:p.Lys345Arg
2L mapping	331202	SNV	1	C	T	27	100	36.1852	CDS: FBgn0051921, Exon: Exon, Gene: FBgn0004611, Gene: FBgn0051921, Misc. feature: contig 2L_1_7 1..50000(1), mRNA: FBgn0051921	FBpp0089225:c.[241-2918C>T]; FBpp0303523:c.[241-2918C>T]; FBpp0089226:c.[241-2918C>T]; FBpp0303524:c.[241-2918C>T]; FBpp0077755:c.[931G>A]; FBpp0077711:c.[241-2918C>T]; FBpp0077710:c.[241-2918C>T]	FBpp0077755:p.Val311Ile
2L mapping	331392	SNV	1	C	T	30	100	32.9	CDS: FBgn0051921, Exon: Exon, Gene: FBgn0004611, Gene: FBgn0051921, Misc. feature: contig 2L_1_7 1..50000(1), mRNA: FBgn0051921	FBpp0077755:c.[741G>A]; FBpp0089226:c.[241-2728C>T]; FBpp0303523:c.[241-2728C>T]; FBpp0077711:c.[241-2728C>T]; FBpp0089225:c.[241-2728C>T]; FBpp0303524:c.[241-2728C>T]; FBpp0077710:c.[241-2728C>T]
2L mapping	331520	SNV	1	G	A	30	100	34.6667	CDS: FBgn0051921, Exon: Exon, Gene: FBgn0004611, Gene: FBgn0051921, Misc. feature: contig 2L_1_7 1..50000(1), mRNA: FBgn0051921	FBpp0089225:c.[241-2600G>A]; FBpp0077710:c.[241-2600G>A]; FBpp0077755:c.[613C>T]; FBpp0077711:c.[241-2600G>A]; FBpp0303523:c.[241-2600G>A]; FBpp0089226:c.[241-2600G>A]; FBpp0303524:c.[241-2600G>A]
2L mapping	332208	SNV	1	A	C	37	100	33.8919	Exon: Exon, Gene: FBgn0004611, Gene: FBgn0051921, Misc. feature: contig 2L_1_7 1..50000(1), mRNA: FBgn0051921	FBpp0303523:c.[241-1912A>C]; FBpp0077710:c.[241-1912A>C]; FBpp0089226:c.[241-1912A>C]; FBpp0089225:c.[241-1912A>C]; FBpp0303524:c.[241-1912A>C]; FBpp0077711:c.[241-1912A>C]
2L mapping	332273	SNV	1	T	A	27	100	33.1852	Exon: Exon, Gene: FBgn0004611, Gene: FBgn0051921, Misc. feature: contig 2L_1_7 1..50000(1), mRNA: FBgn0051921	FBpp0077710:c.[241-1847T>A]; FBpp0303523:c.[241-1847T>A]; FBpp0089225:c.[241-1847T>A]; FBpp0089226:c.[241-1847T>A]; FBpp0077711:c.[241-1847T>A]; FBpp0303524:c.[241-1847T>A]
2L mapping	332361	SNV	1	T	C	27	100	35.037	Gene: FBgn0004611, Misc. feature: contig 2L_1_7 1..50000(1)	FBpp0303523:c.[241-1759T>C]; FBpp0089225:c.[241-1759T>C]; FBpp0089226:c.[241-1759T>C]; FBpp0077711:c.[241-1759T>C]; FBpp0077710:c.[241-1759T>C]; FBpp0303524:c.[241-1759T>C]
2L mapping	332515	SNV	1	G	A	33	100	33.9394	Gene: FBgn0004611, Misc. feature: contig 2L_1_7 1..50000(1)	FBpp0089226:c.[241-1605G>A]; FBpp0303524:c.[241-1605G>A]; FBpp0303523:c.[241-1605G>A]; FBpp0089225:c.[241-1605G>A]; FBpp0077710:c.[241-1605G>A]; FBpp0077711:c.[241-1605G>A]
2L mapping	332672	SNV	1	C	T	17	100	35.5882	Gene: FBgn0004611, Misc. feature: contig 2L_1_7 1..50000(1)	FBpp0089225:c.[241-1448C>T]; FBpp0077711:c.[241-1448C>T]; FBpp0077710:c.[241-1448C>T]; FBpp0303523:c.[241-1448C>T]; FBpp0089226:c.[241-1448C>T]; FBpp0303524:c.[241-1448C>T]
2L mapping	332907	SNV	1	G	A	31	96.7742	34.6	Gene: FBgn0004611, Misc. feature: contig 2L_1_7 1..50000(1)	FBpp0077710:c.[241-1213G>A]; FBpp0077711:c.[241-1213G>A]; FBpp0089226:c.[241-1213G>A]; FBpp0089225:c.[241-1213G>A]; FBpp0303524:c.[241-1213G>A]; FBpp0303523:c.[241-1213G>A]
2L mapping	332917	Deletion	1	C	-	26	92.3077	31.4167	Gene: FBgn0004611, Misc. feature: contig 2L_1_7 1..50000(1)	FBpp0303524:c.[241-1203delC]; FBpp0303523:c.[241-1203delC]; FBpp0077710:c.[241-1203delC]; FBpp0077711:c.[241-1203delC]; FBpp0089226:c.[241-1203delC]; FBpp0089225:c.[241-1203delC]
2L mapping	333077	SNV	1	A	C	33	100	35.9697	Gene: FBgn0004611, Misc. feature: contig 2L_1_7 1..50000(1)	FBpp0089226:c.[241-1043A>C]; FBpp0077711:c.[241-1043A>C]; FBpp0077710:c.[241-1043A>C]; FBpp0303524:c.[241-1043A>C]; FBpp0303523:c.[241-1043A>C]; FBpp0089225:c.[241-1043A>C]
2L mapping	333212	SNV	1	G	A	27	100	34.5926	Gene: FBgn0004611, Misc. feature: contig 2L_1_7 1..50000(1)	FBpp0077710:c.[241-908G>A]; FBpp0089226:c.[241-908G>A]; FBpp0089225:c.[241-908G>A]; FBpp0077711:c.[241-908G>A]; FBpp0303523:c.[241-908G>A]; FBpp0303524:c.[241-908G>A]
2L mapping	333274	MNV	2	AG	TT	24	100	34.9792	Gene: FBgn0004611, Misc. feature: contig 2L_1_7 1..50000(1)	FBpp0077710:c.[241-846_241-845delAGinsTT]; FBpp0089226:c.[241-846_241-845delAGinsTT]; FBpp0089225:c.[241-846_241-845delAGinsTT]; FBpp0303524:c.[241-846_241-845delAGinsTT]; FBpp0077711:c.[241-846_241-845delAGinsTT]; FBpp0303523:c.[241-846_241-845delAGinsTT]
2L mapping	333346	SNV	1	T	C	32	96.875	35.8387	Gene: FBgn0004611, Misc. feature: contig 2L_1_7 1..50000(1)	FBpp0089225:c.[241-774T>C]; FBpp0077710:c.[241-774T>C]; FBpp0089226:c.[241-774T>C]; FBpp0077711:c.[241-774T>C]; FBpp0303524:c.[241-774T>C]; FBpp0303523:c.[241-774T>C]
2L mapping	333423	SNV	1	C	A	44	100	35.6364	Gene: FBgn0004611, Misc. feature: contig 2L_1_7 1..50000(1)	FBpp0077711:c.[241-697C>A]; FBpp0303524:c.[241-697C>A]; FBpp0077710:c.[241-697C>A]; FBpp0089226:c.[241-697C>A]; FBpp0303523:c.[241-697C>A]; FBpp0089225:c.[241-697C>A]
2L mapping	333603	SNV	1	G	C	29	100	34.2069	Gene: FBgn0004611, Misc. feature: contig 2L_1_7 1..50000(1)	FBpp0089226:c.[241-517G>C]; FBpp0303524:c.[241-517G>C]; FBpp0077710:c.[241-517G>C]; FBpp0077711:c.[241-517G>C]; FBpp0303523:c.[241-517G>C]; FBpp0089225:c.[241-517G>C]
2L mapping	333605	SNV	1	G	A	29	100	32.6897	Gene: FBgn0004611, Misc. feature: contig 2L_1_7 1..50000(1)	FBpp0089225:c.[241-515G>A]; FBpp0089226:c.[241-515G>A]; FBpp0077711:c.[241-515G>A]; FBpp0077710:c.[241-515G>A]; FBpp0303523:c.[241-515G>A]; FBpp0303524:c.[241-515G>A]
2L mapping	333667	SNV	1	A	T	32	100	34.2812	Gene: FBgn0004611, Misc. feature: contig 2L_1_7 1..50000(1)	FBpp0089225:c.[241-453A>T]; FBpp0077710:c.[241-453A>T]; FBpp0089226:c.[241-453A>T]; FBpp0303523:c.[241-453A>T]; FBpp0303524:c.[241-453A>T]; FBpp0077711:c.[241-453A>T]
2L mapping	334096	SNV	1	G	T	38	100	34.5	Gene: FBgn0004611, Misc. feature: contig 2L_1_7 1..50000(1)	FBpp0077710:c.[241-24G>T]; FBpp0303523:c.[241-24G>T]; FBpp0077711:c.[241-24G>T]; FBpp0089226:c.[241-24G>T]; FBpp0303524:c.[241-24G>T]; FBpp0089225:c.[241-24G>T]
2L mapping	334394	SNV	1	T	A	31	100	33.3226	Gene: FBgn0004611, Misc. feature: contig 2L_1_7 1..50000(1)	FBpp0077710:c.[378+137T>A]; FBpp0089226:c.[378+137T>A]; FBpp0077711:c.[378+137T>A]; FBpp0303523:c.[378+137T>A]; FBpp0303524:c.[378+137T>A]; FBpp0089225:c.[378+137T>A]
2L mapping	334500	SNV	1	G	T	38	100	33	Gene: FBgn0004611, Misc. feature: contig 2L_1_7 1..50000(1)	FBpp0077711:c.[378+243G>T]; FBpp0303524:c.[378+243G>T]; FBpp0089226:c.[378+243G>T]; FBpp0077710:c.[378+243G>T]; FBpp0303523:c.[378+243G>T]; FBpp0089225:c.[378+243G>T]
2L mapping	335673	Deletion	6	TTCGGG	-	14	78.5714	31.5455	Gene: FBgn0004611, Misc. feature: contig 2L_1_7 1..50000(1)	FBpp0089225:c.[512+125_512+130delTTCGGG]; FBpp0303523:c.[512+125_512+130delTTCGGG]; FBpp0077710:c.[512+125_512+130delTTCGGG]; FBpp0089226:c.[512+125_512+130delTTCGGG]; FBpp0077711:c.[512+125_512+130delTTCGGG]; FBpp0303524:c.[512+125_512+130delTTCGGG]
2L mapping	335706	SNV	1	C	T	25	100	34.36	Gene: FBgn0004611, Misc. feature: contig 2L_1_7 1..50000(1)	FBpp0089225:c.[512+158C>T]; FBpp0303524:c.[512+158C>T]; FBpp0077711:c.[512+158C>T]; FBpp0077710:c.[512+158C>T]; FBpp0089226:c.[512+158C>T]; FBpp0303523:c.[512+158C>T]
2L mapping	336183	SNV	1	G	A	31	100	35.129	CDS: FBgn0004611, CDS: FBgn0004611, CDS: FBgn0004611, CDS: FBgn0004611, CDS: FBgn0004611, CDS: FBgn0004611, Exon: Exon, Gene: FBgn0004611, Misc. feature: contig 2L_1_7 1..50000(1), mRNA: FBgn0004611, mRNA: FBgn0004611, mRNA: FBgn0004611, mRNA: FBgn0004611, mRNA: FBgn0004611, mRNA: FBgn0004611	FBpp0303523:c.[678G>A]; FBpp0077711:c.[678G>A]; FBpp0077710:c.[678G>A]; FBpp0089226:c.[678G>A]; FBpp0089225:c.[678G>A]; FBpp0303524:c.[678G>A]
2L mapping	336508	SNV	1	T	C	30	100	35.3	CDS: FBgn0004611, CDS: FBgn0004611, CDS: FBgn0004611, CDS: FBgn0004611, CDS: FBgn0004611, CDS: FBgn0004611, Exon: Exon, Gene: FBgn0004611, Misc. feature: contig 2L_1_7 1..50000(1), mRNA: FBgn0004611, mRNA: FBgn0004611, mRNA: FBgn0004611, mRNA: FBgn0004611, mRNA: FBgn0004611, mRNA: FBgn0004611	FBpp0077710:c.[858T>C]; FBpp0077711:c.[858T>C]; FBpp0303524:c.[858T>C]; FBpp0303523:c.[858T>C]; FBpp0089226:c.[858T>C]; FBpp0089225:c.[858T>C]
2L mapping	336614	SNV	1	T	C	30	100	33.9	Gene: FBgn0004611, Misc. feature: contig 2L_1_7 1..50000(1)	FBpp0303523:c.[896+68T>C]; FBpp0303524:c.[896+68T>C]; FBpp0089226:c.[896+68T>C]; FBpp0089225:c.[896+68T>C]; FBpp0077711:c.[896+68T>C]; FBpp0077710:c.[896+68T>C]
2L mapping	336662	SNV	1	C	A	28	100	33.8214	Gene: FBgn0004611, Misc. feature: contig 2L_1_7 1..50000(1)	FBpp0077710:c.[896+116C>A]; FBpp0077711:c.[896+116C>A]; FBpp0303523:c.[896+116C>A]; FBpp0089226:c.[896+116C>A]; FBpp0089225:c.[896+116C>A]; FBpp0303524:c.[896+116C>A]
2L mapping	336720	SNV	1	A	G	29	100	34.5172	Gene: FBgn0004611, Misc. feature: contig 2L_1_7 1..50000(1)	FBpp0303524:c.[896+174A>G]; FBpp0303523:c.[896+174A>G]; FBpp0077710:c.[896+174A>G]; FBpp0077711:c.[896+174A>G]; FBpp0089226:c.[896+174A>G]; FBpp0089225:c.[896+174A>G]
2L mapping	336730	SNV	1	A	G	28	100	34.6786	Gene: FBgn0004611, Misc. feature: contig 2L_1_7 1..50000(1)	FBpp0303524:c.[896+184A>G]; FBpp0089225:c.[896+184A>G]; FBpp0077710:c.[896+184A>G]; FBpp0077711:c.[896+184A>G]; FBpp0089226:c.[896+184A>G]; FBpp0303523:c.[896+184A>G]
2L mapping	337444	SNV	1	A	T	42	100	34.0238	Gene: FBgn0004611, Misc. feature: contig 2L_1_7 1..50000(1)	FBpp0303523:c.[897-494A>T]; FBpp0089225:c.[1079+246A>T]; FBpp0303524:c.[1079+246A>T]; FBpp0077710:c.[1079+246A>T]; FBpp0077711:c.[1079+246A>T]; FBpp0089226:c.[1079+246A>T]
2L mapping	337509	SNV	1	T	A	43	100	34.907	Gene: FBgn0004611, Misc. feature: contig 2L_1_7 1..50000(1)	FBpp0303524:c.[1079+311T>A]; FBpp0303523:c.[897-429T>A]; FBpp0089225:c.[1079+311T>A]; FBpp0089226:c.[1079+311T>A]; FBpp0077710:c.[1079+311T>A]; FBpp0077711:c.[1079+311T>A]
2L mapping	337525	SNV	1	C	T	39	100	35.5897	Gene: FBgn0004611, Misc. feature: contig 2L_1_7 1..50000(1)	FBpp0303524:c.[1079+327C>T]; FBpp0089226:c.[1079+327C>T]; FBpp0089225:c.[1079+327C>T]; FBpp0077710:c.[1079+327C>T]; FBpp0077711:c.[1079+327C>T]; FBpp0303523:c.[897-413C>T]
2L mapping	337841	SNV	1	G	A	40	100	33.65	Gene: FBgn0004611, Misc. feature: contig 2L_1_7 1..50000(1)	FBpp0077711:c.[1080-97G>A]; FBpp0089225:c.[1080-97G>A]; FBpp0089226:c.[1080-97G>A]; FBpp0077710:c.[1080-97G>A]; FBpp0303524:c.[1080-97G>A]; FBpp0303523:c.[897-97G>A]
2L mapping	338520	SNV	1	A	C	29	100	34.4483	Gene: FBgn0004611, Misc. feature: contig 2L_1_7 1..50000(1)	FBpp0303523:c.[1077+402A>C]; FBpp0303524:c.[1260+402A>C]; FBpp0077710:c.[1260+402A>C]; FBpp0089225:c.[1260+402A>C]; FBpp0077711:c.[1260+402A>C]; FBpp0089226:c.[1260+402A>C]
2L mapping	338919	SNV	1	C	T	31	100	34.7419	Gene: FBgn0004611, Misc. feature: contig 2L_1_7 1..50000(1)	FBpp0089226:c.[1261-288C>T]; FBpp0303524:c.[1261-288C>T]; FBpp0077710:c.[1261-288C>T]; FBpp0077711:c.[1261-288C>T]; FBpp0303523:c.[1078-288C>T]; FBpp0089225:c.[1261-288C>T]
2L mapping	339014	Insertion	2	-	AT	32	93.75	35.2167	Gene: FBgn0004611, Misc. feature: contig 2L_1_7 1..50000(1)	FBpp0303523:c.[1078-194_1078-193insAT]; FBpp0077710:c.[1261-194_1261-193insAT]; FBpp0303524:c.[1261-194_1261-193insAT]; FBpp0089226:c.[1261-194_1261-193insAT]; FBpp0089225:c.[1261-194_1261-193insAT]; FBpp0077711:c.[1261-194_1261-193insAT]
2L mapping	339030	Insertion	5	-	TCTTA	26	65.3846	34.2588	Gene: FBgn0004611, Misc. feature: contig 2L_1_7 1..50000(1)	FBpp0077711:c.[1261-178_1261-177insTCTTA]; FBpp0089225:c.[1261-178_1261-177insTCTTA]; FBpp0303523:c.[1078-178_1078-177insTCTTA]; FBpp0089226:c.[1261-178_1261-177insTCTTA]; FBpp0303524:c.[1261-178_1261-177insTCTTA]; FBpp0077710:c.[1261-178_1261-177insTCTTA]
2L mapping	339266	SNV	1	G	A	32	100	33.9375	CDS: FBgn0004611, CDS: FBgn0004611, CDS: FBgn0004611, CDS: FBgn0004611, CDS: FBgn0004611, CDS: FBgn0004611, Exon: Exon, Gene: FBgn0004611, Misc. feature: contig 2L_1_7 1..50000(1), mRNA: FBgn0004611, mRNA: FBgn0004611, mRNA: FBgn0004611, mRNA: FBgn0004611, mRNA: FBgn0004611, mRNA: FBgn0004611	FBpp0077710:c.[1320G>A]; FBpp0303523:c.[1137G>A]; FBpp0077711:c.[1320G>A]; FBpp0089225:c.[1320G>A]; FBpp0089226:c.[1320G>A]; FBpp0303524:c.[1320G>A]
2L mapping	339423	SNV	1	C	T	20	100	31.7	CDS: FBgn0004611, CDS: FBgn0004611, CDS: FBgn0004611, CDS: FBgn0004611, CDS: FBgn0004611, CDS: FBgn0004611, Exon: Exon, Gene: FBgn0004611, Misc. feature: contig 2L_1_7 1..50000(1), mRNA: FBgn0004611, mRNA: FBgn0004611, mRNA: FBgn0004611, mRNA: FBgn0004611, mRNA: FBgn0004611, mRNA: FBgn0004611	FBpp0303524:c.[1477C>T]; FBpp0089226:c.[1477C>T]; FBpp0089225:c.[1477C>T]; FBpp0077711:c.[1477C>T]; FBpp0077710:c.[1477C>T]; FBpp0303523:c.[1294C>T]
2L mapping	339514	SNV	1	T	C	29	100	36.2414	Gene: FBgn0004611, Misc. feature: contig 2L_1_7 1..50000(1)	FBpp0089226:c.[1495+73T>C]; FBpp0303523:c.[1312+73T>C]; FBpp0089225:c.[1495+73T>C]; FBpp0077710:c.[1495+73T>C]; FBpp0077711:c.[1495+73T>C]; FBpp0303524:c.[1495+73T>C]
2L mapping	339800	SNV	1	A	G	25	100	36.12	Gene: FBgn0004611, Misc. feature: contig 2L_1_7 1..50000(1)	FBpp0077711:c.[1495+359A>G]; FBpp0089225:c.[1495+359A>G]; FBpp0077710:c.[1495+359A>G]; FBpp0089226:c.[1495+359A>G]; FBpp0303523:c.[1312+359A>G]; FBpp0303524:c.[1495+359A>G]
2L mapping	339972	Deletion	3	TAG	-	31	80.6452	33.28	Gene: FBgn0004611, Misc. feature: contig 2L_1_7 1..50000(1)	FBpp0089225:c.[1495+531_1495+533delTAG]; FBpp0077710:c.[1495+531_1495+533delTAG]; FBpp0089226:c.[1495+531_1495+533delTAG]; FBpp0303523:c.[1312+531_1312+533delTAG]; FBpp0303524:c.[1495+531_1495+533delTAG]; FBpp0077711:c.[1495+531_1495+533delTAG]
2L mapping	339995	SNV	1	A	G	21	100	35.6667	Gene: FBgn0004611, Misc. feature: contig 2L_1_7 1..50000(1)	FBpp0303524:c.[1495+554A>G]; FBpp0077710:c.[1495+554A>G]; FBpp0303523:c.[1312+554A>G]; FBpp0089225:c.[1495+554A>G]; FBpp0089226:c.[1495+554A>G]; FBpp0077711:c.[1495+554A>G]
2L mapping	339997	SNV	1	T	A	21	100	35.2381	Gene: FBgn0004611, Misc. feature: contig 2L_1_7 1..50000(1)	FBpp0077711:c.[1495+556T>A]; FBpp0303523:c.[1312+556T>A]; FBpp0089225:c.[1495+556T>A]; FBpp0077710:c.[1495+556T>A]; FBpp0089226:c.[1495+556T>A]; FBpp0303524:c.[1495+556T>A]
2L mapping	340037	SNV	1	A	C	27	100	33.3333	Gene: FBgn0004611, Misc. feature: contig 2L_1_7 1..50000(1)	FBpp0303523:c.[1312+596A>C]; FBpp0303524:c.[1495+596A>C]; FBpp0089225:c.[1495+596A>C]; FBpp0089226:c.[1495+596A>C]; FBpp0077711:c.[1495+596A>C]; FBpp0077710:c.[1495+596A>C]
2L mapping	340369	SNV	1	A	T	37	100	35	Gene: FBgn0004611, Misc. feature: contig 2L_1_7 1..50000(1)	FBpp0303524:c.[1496-341A>T]; FBpp0077710:c.[1496-341A>T]; FBpp0089225:c.[1496-341A>T]; FBpp0077711:c.[1496-341A>T]; FBpp0303523:c.[1313-341A>T]; FBpp0089226:c.[1496-341A>T]
2L mapping	340737	SNV	1	G	C	29	100	35.069	CDS: FBgn0004611, CDS: FBgn0004611, CDS: FBgn0004611, CDS: FBgn0004611, CDS: FBgn0004611, CDS: FBgn0004611, Exon: Exon, Gene: FBgn0004611, Misc. feature: contig 2L_1_7 1..50000(1), mRNA: FBgn0004611, mRNA: FBgn0004611, mRNA: FBgn0004611, mRNA: FBgn0004611, mRNA: FBgn0004611, mRNA: FBgn0004611	FBpp0089226:c.[1523G>C]; FBpp0077710:c.[1523G>C]; FBpp0077711:c.[1523G>C]; FBpp0089225:c.[1523G>C]; FBpp0303523:c.[1340G>C]; FBpp0303524:c.[1523G>C]	FBpp0089226:p.[Gly508Ala]; FBpp0077710:p.[Gly508Ala]; FBpp0077711:p.[Gly508Ala]; FBpp0089225:p.[Gly508Ala]; FBpp0303523:p.[Gly447Ala]; FBpp0303524:p.[Gly508Ala]
2L mapping	341362	Deletion	1	T	-	29	79.3103	34.2174	Gene: FBgn0004611, Misc. feature: contig 2L_1_7 1..50000(1)	FBpp0303523:c.[1458+507delT]; FBpp0089226:c.[1641+507delT]; FBpp0303524:c.[1641+507delT]; FBpp0077711:c.[1641+507delT]; FBpp0077710:c.[1641+507delT]; FBpp0089225:c.[1641+507delT]
2L mapping	341538	MNV	2	TA	AC	46	39.1304	34.1389	Gene: FBgn0004611, Misc. feature: contig 2L_1_7 1..50000(1)	FBpp0089226:c.[1641+683_1641+684delTAinsAC]; FBpp0089225:c.[1641+683_1641+684delTAinsAC]; FBpp0303523:c.[1458+683_1458+684delTAinsAC]; FBpp0077711:c.[1641+683_1641+684delTAinsAC]; FBpp0077710:c.[1641+683_1641+684delTAinsAC]; FBpp0303524:c.[1641+683_1641+684delTAinsAC]
2L mapping	341542	Deletion	1	C	-	46	60.8696	32.5714	Gene: FBgn0004611, Misc. feature: contig 2L_1_7 1..50000(1)	FBpp0077710:c.[1641+687delC]; FBpp0089226:c.[1641+687delC]; FBpp0303523:c.[1458+687delC]; FBpp0077711:c.[1641+687delC]; FBpp0303524:c.[1641+687delC]; FBpp0089225:c.[1641+687delC]
2L mapping	345421	SNV	1	C	T	33	100	33.6667	CDS: FBgn0004611, CDS: FBgn0004611, CDS: FBgn0004611, CDS: FBgn0004611, CDS: FBgn0004611, CDS: FBgn0004611, Exon: Exon, Exon: Exon, Exon: Exon, Exon: Exon, Gene: FBgn0004611, Misc. feature: contig 2L_1_7 1..50000(1), mRNA: FBgn0004611, mRNA: FBgn0004611, mRNA: FBgn0004611, mRNA: FBgn0004611, mRNA: FBgn0004611, mRNA: FBgn0004611	FBpp0303524:c.[3894C>T]; FBpp0303523:c.[3726C>T]; FBpp0089225:c.[3909C>T]; FBpp0077710:c.[3912C>T]; FBpp0089226:c.[3930C>T]; FBpp0077711:c.[3912C>T]
2L mapping	345482	SNV	1	C	A	34	100	34.9412	Exon: Exon, Exon: Exon, Exon: Exon, Exon: Exon, Gene: FBgn0004611, Misc. feature: contig 2L_1_7 1..50000(1), mRNA: FBgn0004611, mRNA: FBgn0004611, mRNA: FBgn0004611, mRNA: FBgn0004611, mRNA: FBgn0004611, mRNA: FBgn0004611
2L mapping	345756	SNV	1	T	C	43	100	35	Exon: Exon, Exon: Exon, Exon: Exon, Exon: Exon, Gene: FBgn0004611, Misc. feature: contig 2L_1_7 1..50000(1), mRNA: FBgn0004611, mRNA: FBgn0004611, mRNA: FBgn0004611, mRNA: FBgn0004611, mRNA: FBgn0004611, mRNA: FBgn0004611
2L mapping	345870	SNV	1	T	A	36	100	34.5278	Exon: Exon, Exon: Exon, Exon: Exon, Exon: Exon, Gene: FBgn0004611, Misc. feature: contig 2L_1_7 1..50000(1), mRNA: FBgn0004611, mRNA: FBgn0004611, mRNA: FBgn0004611, mRNA: FBgn0004611, mRNA: FBgn0004611, mRNA: FBgn0004611
2L mapping	346797	SNV	1	G	A	37	97.2973	34.8611	Exon: Exon, Exon: Exon, Gene: FBgn0004611, Misc. feature: contig 2L_1_7 1..50000(1), mRNA: FBgn0004611, mRNA: FBgn0004611
2L mapping	347952	SNV	1	A	C	37	40.5405	33.8	Gene: FBgn0004611, Misc. feature: contig 2L_1_7 1..50000(1)
2L mapping	362985	Deletion	1	T	-	90	47.7778	30.8605	Misc. feature: contig 2L_1_8 1..50000(1)
2L mapping	371772	SNV	1	T	G	42	100	34.5476	Misc. feature: contig 2L_1_8 1..50000(1)
2L mapping	371936	SNV	1	T	C	28	100	36.0357	Misc. feature: contig 2L_1_8 1..50000(1)
2L mapping	372188	SNV	1	A	G	29	100	34.9655	Misc. feature: contig 2L_1_8 1..50000(1)
2L mapping	372198	SNV	1	C	G	33	100	34.2727	Misc. feature: contig 2L_1_8 1..50000(1)
2L mapping	373319	SNV	1	A	G	30	100	35.1	Misc. feature: contig 2L_1_8 1..50000(1)
2L mapping	374693	SNV	1	A	T	37	100	35.5135	Misc. feature: contig 2L_1_8 1..50000(1)
2L mapping	374736	SNV	1	C	A	42	100	35.1429	Misc. feature: contig 2L_1_8 1..50000(1)
2L mapping	375966	SNV	1	C	T	35	100	33.6857	Misc. feature: contig 2L_1_8 1..50000(1)
2L mapping	376529	SNV	1	C	T	42	100	33.1667	Misc. feature: contig 2L_1_8 1..50000(1)
2L mapping	377273	SNV	1	T	A	37	100	35.2162	Misc. feature: contig 2L_1_8 1..50000(1)
2L mapping	377955	SNV	1	T	C	26	100	35.4231	Misc. feature: contig 2L_1_8 1..50000(1)
2L mapping	378200	SNV	1	C	T	23	100	34.3913	Exon: Exon, Gene: FBgn0000061, Misc. feature: contig 2L_1_8 1..50000(1), mRNA: FBgn0000061
2L mapping	378373	SNV	1	A	T	36	97.2222	34.7714	Exon: Exon, Gene: FBgn0000061, Misc. feature: contig 2L_1_8 1..50000(1), mRNA: FBgn0000061
2L mapping	378391	SNV	1	A	G	35	100	35.1429	Exon: Exon, Gene: FBgn0000061, Misc. feature: contig 2L_1_8 1..50000(1), mRNA: FBgn0000061
2L mapping	379087	SNV	1	A	G	39	100	34.8974	Gene: FBgn0000061, Misc. feature: contig 2L_1_8 1..50000(1)
2L mapping	379422	SNV	1	T	G	37	100	34.9459	Gene: FBgn0000061, Misc. feature: contig 2L_1_8 1..50000(1)
2L mapping	379490	SNV	1	A	C	34	100	33.7647	Gene: FBgn0000061, Misc. feature: contig 2L_1_8 1..50000(1)
2L mapping	379673	SNV	1	G	A	32	100	33.1562	Gene: FBgn0000061, Misc. feature: contig 2L_1_8 1..50000(1)
2L mapping	379760	SNV	1	G	A	30	100	34.3333	Gene: FBgn0000061, Misc. feature: contig 2L_1_8 1..50000(1)
2L mapping	381261	SNV	1	C	T	43	100	34.3488	Gene: FBgn0000061, Misc. feature: contig 2L_1_8 1..50000(1)
2L mapping	381556	SNV	1	G	A	31	100	35.5161	Gene: FBgn0000061, Misc. feature: contig 2L_1_8 1..50000(1)
2L mapping	381570	Insertion	1	-	T	31	93.5484	34.6552	Gene: FBgn0000061, Misc. feature: contig 2L_1_8 1..50000(1)
2L mapping	381728	SNV	1	A	T	38	97.3684	33.5135	Gene: FBgn0000061, Misc. feature: contig 2L_1_8 1..50000(1)
2L mapping	381787	SNV	1	A	G	33	100	35.6364	Gene: FBgn0000061, Misc. feature: contig 2L_1_8 1..50000(1)
2L mapping	381846	SNV	1	T	C	34	100	33.2941	Gene: FBgn0000061, Misc. feature: contig 2L_1_8 1..50000(1)
2L mapping	382173	SNV	1	G	C	27	100	34.8148	Gene: FBgn0000061, Misc. feature: contig 2L_1_8 1..50000(1)
2L mapping	382411	SNV	1	T	C	37	97.2973	35.7222	Gene: FBgn0000061, Misc. feature: contig 2L_1_8 1..50000(1)
2L mapping	382724	SNV	1	A	G	40	100	35.575	Gene: FBgn0000061, Misc. feature: contig 2L_1_8 1..50000(1)
2L mapping	382861	SNV	1	A	T	37	100	35.4054	Gene: FBgn0000061, Misc. feature: contig 2L_1_8 1..50000(1)
2L mapping	382957	SNV	1	A	T	40	100	35.925	Gene: FBgn0000061, Misc. feature: contig 2L_1_8 1..50000(1)
2L mapping	383384	SNV	1	G	C	31	100	35.6452	Gene: FBgn0000061, Misc. feature: contig 2L_1_8 1..50000(1)
2L mapping	383450	SNV	1	T	C	30	100	35.6333	Gene: FBgn0000061, Misc. feature: contig 2L_1_8 1..50000(1)
2L mapping	383878	Insertion	1	-	T	19	100	34.7368	Gene: FBgn0000061, Misc. feature: contig 2L_1_8 1..50000(1)
2L mapping	384022	SNV	1	T	G	24	100	32.6667	Gene: FBgn0000061, Misc. feature: contig 2L_1_8 1..50000(1)
2L mapping	384054	SNV	1	G	A	30	100	34.6667	Gene: FBgn0000061, Misc. feature: contig 2L_1_8 1..50000(1)
2L mapping	384360	SNV	1	C	T	31	100	36.2258	Gene: FBgn0000061, Misc. feature: contig 2L_1_8 1..50000(1)
2L mapping	384479	Deletion	1	A	-	37	89.1892	30.2424	Gene: FBgn0000061, Misc. feature: contig 2L_1_8 1..50000(1)
2L mapping	385215	SNV	1	A	T	27	100	34.8889	Gene: FBgn0000061, Misc. feature: contig 2L_1_8 1..50000(1)	FBpp0077713:c.344+321A>T
2L mapping	385372	SNV	1	G	A	23	100	36.2174	Gene: FBgn0000061, Misc. feature: contig 2L_1_8 1..50000(1)	FBpp0077713:c.345-329G>A
2L mapping	385397	SNV	1	G	A	25	100	35.52	Gene: FBgn0000061, Misc. feature: contig 2L_1_8 1..50000(1)	FBpp0077713:c.345-304G>A
2L mapping	385512	SNV	1	C	T	33	100	33.6667	Gene: FBgn0000061, Misc. feature: contig 2L_1_8 1..50000(1)	FBpp0077713:c.345-189C>T
2L mapping	385652	SNV	1	T	C	19	100	34.3684	Gene: FBgn0000061, Misc. feature: contig 2L_1_8 1..50000(1)	FBpp0077713:c.345-49T>C
2L mapping	386295	SNV	1	C	A	35	100	35.0571	Gene: FBgn0000061, Misc. feature: contig 2L_1_8 1..50000(1)	FBpp0077713:c.391-13C>A
2L mapping	386803	SNV	1	A	C	28	100	32.75	CDS: FBgn0000061, Exon: Exon, Gene: FBgn0000061, Misc. feature: contig 2L_1_8 1..50000(1), mRNA: FBgn0000061	FBpp0077713:c.760A>C	FBpp0077713:p.Thr254Pro
2L mapping	387006	SNV	1	T	G	27	100	34	CDS: FBgn0000061, Exon: Exon, Gene: FBgn0000061, Misc. feature: contig 2L_1_8 1..50000(1), mRNA: FBgn0000061	FBpp0077713:c.963T>G	FBpp0077713:p.His321Gln
2L mapping	387471	SNV	1	T	A	38	100	35.9737	Misc. feature: contig 2L_1_8 1..50000(1)
2L mapping	388584	Deletion	7	ATGGGAA	-	30	60	34.9444	Misc. feature: contig 2L_1_8 1..50000(1)
2L mapping	388611	SNV	1	A	T	34	100	36.0294	Misc. feature: contig 2L_1_8 1..50000(1)
2L mapping	388673	SNV	1	T	G	30	100	35.9667	Misc. feature: contig 2L_1_8 1..50000(1)
2L mapping	388823	SNV	1	A	G	43	100	34.6512	Misc. feature: contig 2L_1_8 1..50000(1)
2L mapping	389248	Insertion	2	-	AG	36	91.6667	35.697	Misc. feature: contig 2L_1_8 1..50000(1)
2L mapping	389249	Insertion	1	-	C	36	91.6667	35.3333	Misc. feature: contig 2L_1_8 1..50000(1)
2L mapping	389278	SNV	1	G	T	43	100	34.1628	Misc. feature: contig 2L_1_8 1..50000(1)
2L mapping	389330	SNV	1	A	C	42	100	35.0714	Misc. feature: contig 2L_1_8 1..50000(1)
2L mapping	389334	SNV	1	A	G	44	100	34.9773	Misc. feature: contig 2L_1_8 1..50000(1)
2L mapping	389413	SNV	1	T	G	53	100	35.8302	Misc. feature: contig 2L_1_8 1..50000(1)
2L mapping	389698	SNV	1	T	C	28	100	36.5714	Misc. feature: contig 2L_1_8 1..50000(1)
2L mapping	389822	SNV	1	T	A	34	100	34.8824	Misc. feature: contig 2L_1_8 1..50000(1)
2L mapping	390139	SNV	1	G	A	24	100	34.625	Misc. feature: contig 2L_1_8 1..50000(1)
2L mapping	390346	SNV	1	C	T	21	100	35.4762	Misc. feature: contig 2L_1_8 1..50000(1)
2L mapping	390348	SNV	1	A	T	21	100	34.1429	Misc. feature: contig 2L_1_8 1..50000(1)
2L mapping	390526	Replacement	2	A	TT	24	87.5	36.4524	Misc. feature: contig 2L_1_8 1..50000(1)
2L mapping	390995	SNV	1	T	C	33	100	35.6667	Misc. feature: contig 2L_1_8 1..50000(1)
2L mapping	391220	SNV	1	A	T	37	100	33.8919	Misc. feature: contig 2L_1_8 1..50000(1)
2L mapping	391345	SNV	1	T	C	46	100	34.0217	Misc. feature: contig 2L_1_8 1..50000(1)
2L mapping	391355	Deletion	3	AAA	-	46	82.6087	32.8947	Misc. feature: contig 2L_1_8 1..50000(1)
2L mapping	391904	SNV	1	A	G	29	100	32.6897	Misc. feature: contig 2L_1_8 1..50000(1)
2L mapping	392047	SNV	1	A	T	25	100	32	Misc. feature: contig 2L_1_8 1..50000(1)
2L mapping	392479	MNV	2	GA	AG	29	100	35.0345	Misc. feature: contig 2L_1_8 1..50000(1)
2L mapping	393147	SNV	1	A	C	34	100	35.7353	Misc. feature: contig 2L_1_8 1..50000(1)
2L mapping	393238	MNV	2	GG	AC	26	100	35.3654	Misc. feature: contig 2L_1_8 1..50000(1)
2L mapping	393674	Replacement	2	GT	A	41	36.5854	35.2	Misc. feature: contig 2L_1_8 1..50000(1)
2L mapping	393983	SNV	1	A	C	32	100	36.0625	Misc. feature: contig 2L_1_8 1..50000(1)
2L mapping	394144	SNV	1	G	T	33	100	35.5152	Misc. feature: contig 2L_1_8 1..50000(1)
2L mapping	394164	Insertion	1	-	A	34	94.1176	35.5625	Misc. feature: contig 2L_1_8 1..50000(1)
2L mapping	394628	SNV	1	T	C	48	100	35.8542	Misc. feature: contig 2L_1_8 1..50000(1)
2L mapping	395538	SNV	1	G	T	25	100	36.52	Misc. feature: contig 2L_1_8 1..50000(1)
2L mapping	395661	SNV	1	C	A	29	100	35.3103	Misc. feature: contig 2L_1_8 1..50000(1)
2L mapping	395765	SNV	1	C	G	16	100	33.5	Misc. feature: contig 2L_1_8 1..50000(1)
2L mapping	395803	SNV	1	G	T	21	100	32.5238	Misc. feature: contig 2L_1_8 1..50000(1)
2L mapping	396526	SNV	1	C	T	31	100	35.4839	Misc. RNA: FBgn0263871, Exon: Exon, Gene: FBgn0263871, Misc. feature: contig 2L_1_8 1..50000(1)
2L mapping	396732	SNV	1	A	T	23	100	33.9565	Exon: Exon, Gene: FBgn0031251, Misc. feature: contig 2L_1_8 1..50000(1), mRNA: FBgn0031251, mRNA: FBgn0031251
2L mapping	397016	SNV	1	A	G	39	100	35.641	CDS: FBgn0031251, CDS: FBgn0031251, Exon: Exon, Gene: FBgn0031251, Misc. feature: contig 2L_1_8 1..50000(1), mRNA: FBgn0031251, mRNA: FBgn0031251	FBpp0077752:c.[3480T>C]; FBpp0303631:c.[3480T>C]
2L mapping	397095	SNV	1	A	C	37	97.2973	33.1667	CDS: FBgn0031251, CDS: FBgn0031251, Exon: Exon, Gene: FBgn0031251, Misc. feature: contig 2L_1_8 1..50000(1), mRNA: FBgn0031251, mRNA: FBgn0031251	FBpp0077752:c.[3401T>G]; FBpp0303631:c.[3401T>G]	FBpp0077752:p.[Val1134Gly]; FBpp0303631:p.[Val1134Gly]
2L mapping	397136	SNV	1	T	A	35	100	34.5143	CDS: FBgn0031251, CDS: FBgn0031251, Exon: Exon, Gene: FBgn0031251, Misc. feature: contig 2L_1_8 1..50000(1), mRNA: FBgn0031251, mRNA: FBgn0031251	FBpp0303631:c.[3360A>T]; FBpp0077752:c.[3360A>T]
2L mapping	397179	SNV	1	A	C	38	100	33.6316	CDS: FBgn0031251, CDS: FBgn0031251, Exon: Exon, Gene: FBgn0031251, Misc. feature: contig 2L_1_8 1..50000(1), mRNA: FBgn0031251, mRNA: FBgn0031251	FBpp0303631:c.[3317T>G]; FBpp0077752:c.[3317T>G]	FBpp0303631:p.[Phe1106Cys]; FBpp0077752:p.[Phe1106Cys]
2L mapping	397261	SNV	1	A	G	32	100	33.0312	CDS: FBgn0031251, CDS: FBgn0031251, Exon: Exon, Gene: FBgn0031251, Misc. feature: contig 2L_1_8 1..50000(1), mRNA: FBgn0031251, mRNA: FBgn0031251	FBpp0077752:c.[3235T>C]; FBpp0303631:c.[3235T>C]	FBpp0077752:p.[Ser1079Pro]; FBpp0303631:p.[Ser1079Pro]
2L mapping	397289	SNV	1	C	T	34	100	34.5	CDS: FBgn0031251, CDS: FBgn0031251, Exon: Exon, Gene: FBgn0031251, Misc. feature: contig 2L_1_8 1..50000(1), mRNA: FBgn0031251, mRNA: FBgn0031251	FBpp0303631:c.[3207G>A]; FBpp0077752:c.[3207G>A]
2L mapping	397416	SNV	1	G	T	33	100	34.8182	CDS: FBgn0031251, CDS: FBgn0031251, Exon: Exon, Gene: FBgn0031251, Misc. feature: contig 2L_1_8 1..50000(1), mRNA: FBgn0031251, mRNA: FBgn0031251	FBpp0303631:c.[3080C>A]; FBpp0077752:c.[3080C>A]	FBpp0303631:p.[Thr1027Asn]; FBpp0077752:p.[Thr1027Asn]
2L mapping	397420	SNV	1	C	T	32	96.875	33.7097	CDS: FBgn0031251, CDS: FBgn0031251, Exon: Exon, Gene: FBgn0031251, Misc. feature: contig 2L_1_8 1..50000(1), mRNA: FBgn0031251, mRNA: FBgn0031251	FBpp0303631:c.[3076G>A]; FBpp0077752:c.[3076G>A]	FBpp0303631:p.[Ala1026Thr]; FBpp0077752:p.[Ala1026Thr]
2L mapping	397474	SNV	1	T	C	30	100	36.2333	CDS: FBgn0031251, CDS: FBgn0031251, Exon: Exon, Gene: FBgn0031251, Misc. feature: contig 2L_1_8 1..50000(1), mRNA: FBgn0031251, mRNA: FBgn0031251	FBpp0303631:c.[3022A>G]; FBpp0077752:c.[3022A>G]	FBpp0303631:p.[Thr1008Ala]; FBpp0077752:p.[Thr1008Ala]
2L mapping	398075	SNV	1	A	G	41	100	35.4146	CDS: FBgn0031251, CDS: FBgn0031251, Exon: Exon, Gene: FBgn0031251, Misc. feature: contig 2L_1_8 1..50000(1), mRNA: FBgn0031251, mRNA: FBgn0031251	FBpp0077752:c.[2421T>C]; FBpp0303631:c.[2421T>C]
2L mapping	398089	SNV	1	C	G	40	100	34.825	CDS: FBgn0031251, CDS: FBgn0031251, Exon: Exon, Gene: FBgn0031251, Misc. feature: contig 2L_1_8 1..50000(1), mRNA: FBgn0031251, mRNA: FBgn0031251	FBpp0077752:c.[2407G>C]; FBpp0303631:c.[2407G>C]	FBpp0077752:p.[Glu803Gln]; FBpp0303631:p.[Glu803Gln]
2L mapping	398117	SNV	1	T	G	38	100	34.3421	CDS: FBgn0031251, CDS: FBgn0031251, Exon: Exon, Gene: FBgn0031251, Misc. feature: contig 2L_1_8 1..50000(1), mRNA: FBgn0031251, mRNA: FBgn0031251	FBpp0077752:c.[2379A>C]; FBpp0303631:c.[2379A>C]
2L mapping	398222	SNV	1	A	T	35	100	35.0857	CDS: FBgn0031251, CDS: FBgn0031251, Exon: Exon, Gene: FBgn0031251, Misc. feature: contig 2L_1_8 1..50000(1), mRNA: FBgn0031251, mRNA: FBgn0031251	FBpp0077752:c.[2274T>A]; FBpp0303631:c.[2274T>A]	FBpp0077752:p.[Asp758Glu]; FBpp0303631:p.[Asp758Glu]
2L mapping	398594	SNV	1	T	G	35	97.1429	33.1176	CDS: FBgn0031251, CDS: FBgn0031251, Exon: Exon, Gene: FBgn0031251, Misc. feature: contig 2L_1_8 1..50000(1), mRNA: FBgn0031251, mRNA: FBgn0031251	FBpp0303631:c.[1902A>C]; FBpp0077752:c.[1902A>C]
2L mapping	398834	SNV	1	C	T	42	97.619	35.0732	CDS: FBgn0031251, CDS: FBgn0031251, Exon: Exon, Gene: FBgn0031251, Misc. feature: contig 2L_1_8 1..50000(1), mRNA: FBgn0031251, mRNA: FBgn0031251	FBpp0303631:c.[1662G>A]; FBpp0077752:c.[1662G>A]
2L mapping	399912	SNV	1	T	A	25	96	36.25	CDS: FBgn0031251, CDS: FBgn0031251, Exon: Exon, Gene: FBgn0031251, Misc. feature: contig 2L_1_8 1..50000(1), mRNA: FBgn0031251, mRNA: FBgn0031251	FBpp0077752:c.[1565A>T]; FBpp0303631:c.[1565A>T]	FBpp0077752:p.[Asp522Val]; FBpp0303631:p.[Asp522Val]
2L mapping	400496	Deletion	7	ATATAAG	-	20	95	27.2632	Gene: FBgn0031251, Misc. feature: contig 2L_1_9 1..50000(1)	FBpp0303631:c.[1020+21_1020+27delCTTATAT]; FBpp0077752:c.[1020+21_1020+27delCTTATAT]
2L mapping	400583	SNV	1	C	T	36	100	34.1667	CDS: FBgn0031251, CDS: FBgn0031251, Exon: Exon, Gene: FBgn0031251, Misc. feature: contig 2L_1_9 1..50000(1), mRNA: FBgn0031251, mRNA: FBgn0031251	FBpp0303631:c.[960G>A]; FBpp0077752:c.[960G>A]
2L mapping	402178	SNV	1	A	G	36	97.2222	33	Exon: Exon, Gene: FBgn0031251, Misc. feature: contig 2L_1_9 1..50000(1), mRNA: FBgn0031251
2L mapping	405939	SNV	1	T	C	30	100	34.6	CDS: FBgn0003278, Exon: Exon, Gene: FBgn0003278, Misc. feature: contig 2L_1_9 1..50000(1), mRNA: FBgn0003278	FBpp0077714:c.1494T>C
2L mapping	412540	SNV	1	C	T	46	100	35.2174	CDS: FBgn0264855, CDS: FBgn0264855, Exon: Exon, Gene: FBgn0264855, Misc. feature: contig 2L_1_9 1..50000(1), mRNA: FBgn0264855, mRNA: FBgn0264855	FBpp0088945:c.[219G>A]; FBpp0088490:c.[183G>A]
2L mapping	413638	SNV	1	C	T	37	100	34.7838	Exon: Exon, Gene: FBgn0264855, Misc. feature: contig 2L_1_9 1..50000(1), mRNA: FBgn0264855
2L mapping	413821	Deletion	2	AC	-	32	84.375	34.9259	Gene: FBgn0264855, Misc. feature: contig 2L_1_9 1..50000(1)
2L mapping	413906	SNV	1	C	T	27	100	36.4074	Gene: FBgn0264855, Misc. feature: contig 2L_1_9 1..50000(1)
2L mapping	413942	SNV	1	A	G	32	100	34.9688	Gene: FBgn0264855, Misc. feature: contig 2L_1_9 1..50000(1)
2L mapping	414058	SNV	1	T	G	33	100	33.4242	Gene: FBgn0264855, Misc. feature: contig 2L_1_9 1..50000(1)
2L mapping	414368	Deletion	2	AA	-	30	86.6667	32.7308	Gene: FBgn0264855, Misc. feature: contig 2L_1_9 1..50000(1)
2L mapping	414906	SNV	1	C	G	37	97.2973	33.8333	Misc. feature: contig 2L_1_9 1..50000(1)
2L mapping	415294	SNV	1	C	T	22	95.4545	33.8571	Exon: Exon, Gene: FBgn0263933, Misc. feature: contig 2L_1_9 1..50000(1), mRNA: FBgn0263933
2L mapping	415352	SNV	1	C	A	25	100	33.32	Exon: Exon, Gene: FBgn0263933, Misc. feature: contig 2L_1_9 1..50000(1), mRNA: FBgn0263933
2L mapping	415996	SNV	1	G	A	29	100	33.4138	CDS: FBgn0263933, Exon: Exon, Gene: FBgn0263933, Misc. feature: contig 2L_1_9 1..50000(1), mRNA: FBgn0263933	FBpp0077715:c.543G>A
2L mapping	416140	SNV	1	T	C	29	96.5517	33.4643	CDS: FBgn0263933, Exon: Exon, Gene: FBgn0263933, Misc. feature: contig 2L_1_9 1..50000(1), mRNA: FBgn0263933	FBpp0077715:c.687T>C
2L mapping	416256	SNV	1	C	T	24	100	32.4167	CDS: FBgn0263933, Exon: Exon, Gene: FBgn0263933, Misc. feature: contig 2L_1_9 1..50000(1), mRNA: FBgn0263933	FBpp0077715:c.803C>T	FBpp0077715:p.Ser268Phe
2L mapping	418854	SNV	1	G	A	31	100	34.1935	CDS: FBgn0031252, Exon: Exon, Gene: FBgn0031252, Misc. feature: contig 2L_1_9 1..50000(1), mRNA: FBgn0031252	FBpp0077750:c.747C>T
2L mapping	418911	SNV	1	A	G	21	100	33.5238	CDS: FBgn0031252, Exon: Exon, Gene: FBgn0031252, Misc. feature: contig 2L_1_9 1..50000(1), mRNA: FBgn0031252	FBpp0077750:c.690T>C
2L mapping	419394	SNV	1	C	T	33	100	33.697	CDS: FBgn0031252, Exon: Exon, Gene: FBgn0031252, Misc. feature: contig 2L_1_9 1..50000(1), mRNA: FBgn0031252	FBpp0077750:c.207G>A
2L mapping	419611	Deletion	1	T	-	30	93.3333	33.9286	Exon: Exon, Gene: FBgn0031252, Misc. feature: contig 2L_1_9 1..50000(1), mRNA: FBgn0031252
2L mapping	419919	SNV	1	C	T	36	94.4444	36.4706	Misc. feature: contig 2L_1_9 1..50000(1)
2L mapping	420029	SNV	1	A	C	34	100	35.9706	Exon: Exon, Gene: FBgn0002593, Misc. feature: contig 2L_1_9 1..50000(1), mRNA: FBgn0002593, mRNA: FBgn0002593
2L mapping	420177	SNV	1	A	C	40	100	35.1	Gene: FBgn0002593, Misc. feature: contig 2L_1_9 1..50000(1)	FBpp0304265:c.[72+31A>C]; FBpp0077716:c.[72+31A>C]
2L mapping	420229	Deletion	1	G	-	41	92.6829	35.2368	Gene: FBgn0002593, Misc. feature: contig 2L_1_9 1..50000(1)	FBpp0304265:c.[73-63delG]; FBpp0077716:c.[73-63delG]
2L mapping	420569	SNV	1	G	A	27	100	31.3704	Exon: Exon, Exon: Exon, Gene: FBgn0002593, Misc. feature: contig 2L_1_9 1..50000(1), mRNA: FBgn0002593, mRNA: FBgn0002593
2L mapping	420703	Deletion	3	ATT	-	28	89.2857	33.24	Exon: Exon, Gene: FBgn0002593, Misc. feature: contig 2L_1_9 1..50000(1), mRNA: FBgn0002593
2L mapping	420731	SNV	1	G	A	34	97.0588	34.7576	Exon: Exon, Gene: FBgn0002593, Misc. feature: contig 2L_1_9 1..50000(1), mRNA: FBgn0002593
2L mapping	420794	SNV	1	T	C	32	100	36	Exon: Exon, Gene: FBgn0002593, Misc. feature: contig 2L_1_9 1..50000(1), mRNA: FBgn0002593
2L mapping	420836	Insertion	1	-	A	26	100	35.7308	Exon: Exon, Gene: FBgn0002593, Misc. feature: contig 2L_1_9 1..50000(1), mRNA: FBgn0002593
2L mapping	421361	SNV	1	G	A	31	100	34.1935	CDS: FBgn0031253, Exon: Exon, Gene: FBgn0031253, Misc. feature: contig 2L_1_9 1..50000(1), mRNA: FBgn0031253	FBpp0077749:c.6C>T
2L mapping	421794	SNV	1	G	T	33	100	35.303	Exon: Exon, Gene: FBgn0031254, Misc. feature: contig 2L_1_9 1..50000(1), mRNA: FBgn0031254
2L mapping	421883	SNV	1	T	C	31	100	34.5806	CDS: FBgn0031254, Exon: Exon, Gene: FBgn0031254, Misc. feature: contig 2L_1_9 1..50000(1), mRNA: FBgn0031254	FBpp0077717:c.84T>C
2L mapping	422345	SNV	1	A	G	32	100	35.8125	CDS: FBgn0031254, Exon: Exon, Gene: FBgn0031254, Misc. feature: contig 2L_1_9 1..50000(1), mRNA: FBgn0031254	FBpp0077717:c.492A>G
2L mapping	422372	SNV	1	G	A	32	100	36.1875	CDS: FBgn0031254, Exon: Exon, Gene: FBgn0031254, Misc. feature: contig 2L_1_9 1..50000(1), mRNA: FBgn0031254	FBpp0077717:c.519G>A
2L mapping	422457	SNV	1	T	A	38	100	34.7105	Exon: Exon, Gene: FBgn0031254, Misc. feature: contig 2L_1_9 1..50000(1), mRNA: FBgn0031254
2L mapping	422475	SNV	1	A	T	40	100	35.625	Exon: Exon, Gene: FBgn0031254, Misc. feature: contig 2L_1_9 1..50000(1), mRNA: FBgn0031254
2L mapping	422489	SNV	1	G	A	41	100	34.7805	Exon: Exon, Gene: FBgn0031254, Misc. feature: contig 2L_1_9 1..50000(1), mRNA: FBgn0031254
2L mapping	422507	SNV	1	T	A	40	100	34.15	Misc. feature: contig 2L_1_9 1..50000(1)
2L mapping	422846	SNV	1	A	G	36	100	34.4722	Misc. feature: contig 2L_1_9 1..50000(1)
2L mapping	422848	SNV	1	A	G	36	100	35.4722	Misc. feature: contig 2L_1_9 1..50000(1)
2L mapping	423177	SNV	1	T	C	33	100	31.5455	Exon: Exon, Gene: FBgn0031255, Misc. feature: contig 2L_1_9 1..50000(1), mRNA: FBgn0031255
2L mapping	423269	Deletion	1	A	-	31	93.5484	30.3793	Exon: Exon, Gene: FBgn0031255, Misc. feature: contig 2L_1_9 1..50000(1), mRNA: FBgn0031255
2L mapping	423273	MNV	2	GA	TT	29	100	35.2414	Exon: Exon, Gene: FBgn0031255, Misc. feature: contig 2L_1_9 1..50000(1), mRNA: FBgn0031255
2L mapping	423311	SNV	1	A	G	34	97.0588	34.9394	Exon: Exon, Gene: FBgn0031255, Misc. feature: contig 2L_1_9 1..50000(1), mRNA: FBgn0031255
2L mapping	423406	Deletion	1	T	-	34	67.6471	31.9565	Exon: Exon, Gene: FBgn0031255, Misc. feature: contig 2L_1_9 1..50000(1), mRNA: FBgn0031255
2L mapping	423522	SNV	1	C	T	21	100	33.2381	CDS: FBgn0031255, Exon: Exon, Gene: FBgn0031255, Misc. feature: contig 2L_1_9 1..50000(1), mRNA: FBgn0031255	FBpp0077718:c.71C>T	FBpp0077718:p.Ser24Phe
2L mapping	423835	SNV	1	A	C	26	96.1538	34.28	CDS: FBgn0031255, Exon: Exon, Gene: FBgn0031255, Misc. feature: contig 2L_1_9 1..50000(1), mRNA: FBgn0031255	FBpp0077718:c.384A>C
2L mapping	423935	SNV	1	C	T	24	100	34.6667	CDS: FBgn0031255, Exon: Exon, Gene: FBgn0031255, Misc. feature: contig 2L_1_9 1..50000(1), mRNA: FBgn0031255	FBpp0077718:c.414C>T
2L mapping	424082	SNV	1	G	T	15	100	31.1333	CDS: FBgn0031255, Exon: Exon, Gene: FBgn0031255, Misc. feature: contig 2L_1_9 1..50000(1), mRNA: FBgn0031255	FBpp0077718:c.561G>T
2L mapping	424139	SNV	1	A	G	18	100	32.6667	CDS: FBgn0031255, Exon: Exon, Gene: FBgn0031255, Misc. feature: contig 2L_1_9 1..50000(1), mRNA: FBgn0031255	FBpp0077718:c.618A>G
2L mapping	424145	SNV	1	T	A	22	100	35.1364	CDS: FBgn0031255, Exon: Exon, Gene: FBgn0031255, Misc. feature: contig 2L_1_9 1..50000(1), mRNA: FBgn0031255	FBpp0077718:c.624T>A
2L mapping	424295	SNV	1	T	C	24	100	33.75	CDS: FBgn0031255, Exon: Exon, Gene: FBgn0031255, Misc. feature: contig 2L_1_9 1..50000(1), mRNA: FBgn0031255	FBpp0077718:c.774T>C
2L mapping	424367	SNV	1	G	A	32	96.875	34.1935	CDS: FBgn0031255, Exon: Exon, Gene: FBgn0031255, Misc. feature: contig 2L_1_9 1..50000(1), mRNA: FBgn0031255	FBpp0077718:c.846G>A
2L mapping	424681	SNV	1	C	T	34	100	33.4706	CDS: FBgn0031255, Exon: Exon, Gene: FBgn0031255, Misc. feature: contig 2L_1_9 1..50000(1), mRNA: FBgn0031255	FBpp0077718:c.1160C>T	FBpp0077718:p.Ala387Val
2L mapping	425105	SNV	1	T	C	36	100	34.75	CDS: FBgn0031255, Exon: Exon, Gene: FBgn0031255, Misc. feature: contig 2L_1_9 1..50000(1), mRNA: FBgn0031255	FBpp0077718:c.1464T>C
2L mapping	425876	SNV	1	G	A	31	100	35.1613	Misc. feature: contig 2L_1_9 1..50000(1)
2L mapping	426674	SNV	1	T	C	10	60	27.3333	Misc. feature: contig 2L_1_9 1..50000(1)
2L mapping	426675	Insertion	1	-	C	10	40	37	Misc. feature: contig 2L_1_9 1..50000(1)
2L mapping	426734	SNV	1	G	A	25	100	34.96	Misc. feature: contig 2L_1_9 1..50000(1)
2L mapping	426747	SNV	1	T	C	28	100	34.1071	Misc. feature: contig 2L_1_9 1..50000(1)
2L mapping	429144	SNV	1	G	C	26	100	35.6154	Misc. feature: contig 2L_1_9 1..50000(1)
2L mapping	429845	SNV	1	C	A	26	100	34.6923	Misc. feature: contig 2L_1_9 1..50000(1)
2L mapping	430184	SNV	1	T	C	21	100	34.381	Misc. feature: contig 2L_1_9 1..50000(1)
2L mapping	430324	Deletion	11	CTAAGTAGCCC	-	21	66.6667	34.7857	Misc. feature: contig 2L_1_9 1..50000(1)
2L mapping	431795	SNV	1	T	G	32	100	35.3438	Exon: Exon, Exon: Exon, Gene: FBgn0004583, Misc. feature: contig 2L_1_9 1..50000(1), mRNA: FBgn0004583, mRNA: FBgn0004583
2L mapping	431799	SNV	1	T	G	30	100	34.9333	Exon: Exon, Exon: Exon, Gene: FBgn0004583, Misc. feature: contig 2L_1_9 1..50000(1), mRNA: FBgn0004583, mRNA: FBgn0004583
2L mapping	432313	Insertion	1	-	T	28	46.4286	37	Gene: FBgn0004583, Misc. feature: contig 2L_1_9 1..50000(1)
2L mapping	432453	SNV	1	C	A	28	100	32.3929	Gene: FBgn0004583, Misc. feature: contig 2L_1_9 1..50000(1)
2L mapping	432716	SNV	1	G	C	28	96.4286	35.5556	Gene: FBgn0004583, Misc. feature: contig 2L_1_9 1..50000(1)
2L mapping	433086	Replacement	3	TTG	C	23	100	33.3043	Gene: FBgn0004583, Misc. feature: contig 2L_1_9 1..50000(1)
2L mapping	433090	MNV	2	TC	CA	23	100	36.1087	Gene: FBgn0004583, Misc. feature: contig 2L_1_9 1..50000(1)
2L mapping	433451	SNV	1	C	T	25	96	33.125	Gene: FBgn0004583, Misc. feature: contig 2L_1_9 1..50000(1)
2L mapping	434004	SNV	1	G	A	31	100	34.4194	Gene: FBgn0004583, Misc. feature: contig 2L_1_9 1..50000(1)
2L mapping	434246	Insertion	2	-	AA	30	80	35.2917	Gene: FBgn0004583, Misc. feature: contig 2L_1_9 1..50000(1)
2L mapping	434250	SNV	1	C	A	30	100	31.4333	Gene: FBgn0004583, Misc. feature: contig 2L_1_9 1..50000(1)
2L mapping	434699	SNV	1	C	A	29	100	34.4138	Gene: FBgn0004583, Misc. feature: contig 2L_1_9 1..50000(1)
2L mapping	434886	SNV	1	T	G	31	100	34.6774	Gene: FBgn0004583, Misc. feature: contig 2L_1_9 1..50000(1)
2L mapping	434929	SNV	1	G	A	30	100	35.9333	Gene: FBgn0004583, Misc. feature: contig 2L_1_9 1..50000(1)
2L mapping	434949	SNV	1	A	G	29	100	35.5862	Gene: FBgn0004583, Misc. feature: contig 2L_1_9 1..50000(1)
2L mapping	434980	SNV	1	G	T	35	100	34.7714	Gene: FBgn0004583, Misc. feature: contig 2L_1_9 1..50000(1)
2L mapping	435001	SNV	1	T	G	40	100	35.2	Gene: FBgn0004583, Misc. feature: contig 2L_1_9 1..50000(1)
2L mapping	435121	SNV	1	T	A	42	100	32.5952	Gene: FBgn0004583, Misc. feature: contig 2L_1_9 1..50000(1)
2L mapping	435339	SNV	1	C	T	39	100	34.359	Gene: FBgn0004583, Misc. feature: contig 2L_1_9 1..50000(1)
2L mapping	435397	SNV	1	A	T	35	100	35.5714	Gene: FBgn0004583, Misc. feature: contig 2L_1_9 1..50000(1)
2L mapping	435431	SNV	1	G	C	27	100	35.7037	Gene: FBgn0004583, Misc. feature: contig 2L_1_9 1..50000(1)
2L mapping	435603	SNV	1	G	A	30	100	34.8333	Gene: FBgn0004583, Misc. feature: contig 2L_1_9 1..50000(1)
2L mapping	435615	SNV	1	C	T	36	94.4444	36.2941	Gene: FBgn0004583, Misc. feature: contig 2L_1_9 1..50000(1)
2L mapping	435618	Insertion	1	-	A	36	80.5556	35.6897	Gene: FBgn0004583, Misc. feature: contig 2L_1_9 1..50000(1)
2L mapping	435629	SNV	1	C	T	34	100	34.5882	Gene: FBgn0004583, Misc. feature: contig 2L_1_9 1..50000(1)
2L mapping	435660	Deletion	5	AATTA	-	14	92.8571	32.6154	Gene: FBgn0004583, Misc. feature: contig 2L_1_9 1..50000(1)
2L mapping	435667	Deletion	3	AAT	-	22	59.0909	33.0769	Gene: FBgn0004583, Misc. feature: contig 2L_1_9 1..50000(1)
2L mapping	435671	Deletion	3	GGT	-	23	56.5217	34.3846	Gene: FBgn0004583, Misc. feature: contig 2L_1_9 1..50000(1)
2L mapping	435673	Deletion	1	T	-	23	43.4783	28.6	Gene: FBgn0004583, Misc. feature: contig 2L_1_9 1..50000(1)
2L mapping	436011	Insertion	1	-	C	15	93.3333	33.2143	Gene: FBgn0004583, Misc. feature: contig 2L_1_9 1..50000(1)
2L mapping	436054	SNV	1	C	T	21	100	30.5238	Gene: FBgn0004583, Misc. feature: contig 2L_1_9 1..50000(1)
2L mapping	436060	SNV	1	A	G	23	100	33.9565	Gene: FBgn0004583, Misc. feature: contig 2L_1_9 1..50000(1)
2L mapping	436179	SNV	1	C	T	31	100	36.2258	Gene: FBgn0004583, Misc. feature: contig 2L_1_9 1..50000(1)
2L mapping	436207	SNV	1	T	A	38	100	33.4737	Gene: FBgn0004583, Misc. feature: contig 2L_1_9 1..50000(1)
2L mapping	436286	SNV	1	C	G	36	100	34.7778	Gene: FBgn0004583, Misc. feature: contig 2L_1_9 1..50000(1)
2L mapping	436495	SNV	1	G	A	32	100	36.4375	Gene: FBgn0004583, Misc. feature: contig 2L_1_9 1..50000(1)
2L mapping	436497	SNV	1	A	C	32	100	35.9688	Gene: FBgn0004583, Misc. feature: contig 2L_1_9 1..50000(1)
2L mapping	436671	SNV	1	C	G	35	100	35.7714	Gene: FBgn0004583, Misc. feature: contig 2L_1_9 1..50000(1)
2L mapping	436694	SNV	1	C	T	26	100	35.5	Gene: FBgn0004583, Misc. feature: contig 2L_1_9 1..50000(1)
2L mapping	436726	SNV	1	C	A	20	100	34.75	Gene: FBgn0004583, Misc. feature: contig 2L_1_9 1..50000(1)
2L mapping	436774	SNV	1	G	A	38	100	34.2368	Gene: FBgn0004583, Misc. feature: contig 2L_1_9 1..50000(1)
2L mapping	436900	SNV	1	T	C	42	100	35.5476	Gene: FBgn0004583, Misc. feature: contig 2L_1_9 1..50000(1)
2L mapping	437215	SNV	1	A	G	37	100	36.4054	Gene: FBgn0004583, Misc. feature: contig 2L_1_9 1..50000(1)
2L mapping	437253	SNV	1	C	A	40	100	34.975	Gene: FBgn0004583, Misc. feature: contig 2L_1_9 1..50000(1)
2L mapping	437276	Insertion	6	-	TTTGTT	32	65.625	33.5952	Gene: FBgn0004583, Misc. feature: contig 2L_1_9 1..50000(1)
2L mapping	437359	SNV	1	G	A	29	100	34.2759	Gene: FBgn0004583, Misc. feature: contig 2L_1_9 1..50000(1)
2L mapping	437482	SNV	1	C	T	31	100	33.4194	Gene: FBgn0004583, Misc. feature: contig 2L_1_9 1..50000(1)
2L mapping	437487	SNV	1	T	C	29	100	36.1034	Gene: FBgn0004583, Misc. feature: contig 2L_1_9 1..50000(1)
2L mapping	437495	SNV	1	G	C	32	100	35.2812	Gene: FBgn0004583, Misc. feature: contig 2L_1_9 1..50000(1)
2L mapping	437500	SNV	1	T	C	34	100	34.7059	Gene: FBgn0004583, Misc. feature: contig 2L_1_9 1..50000(1)
2L mapping	437556	SNV	1	A	T	35	100	35.8857	Gene: FBgn0004583, Misc. feature: contig 2L_1_9 1..50000(1)
2L mapping	437589	SNV	1	C	T	34	100	34.7059	Gene: FBgn0004583, Misc. feature: contig 2L_1_9 1..50000(1)
2L mapping	438020	SNV	1	T	C	28	96.4286	35.3333	Gene: FBgn0004583, Misc. feature: contig 2L_1_9 1..50000(1)
2L mapping	438077	SNV	1	C	T	34	100	36.1176	Gene: FBgn0004583, Misc. feature: contig 2L_1_9 1..50000(1)
2L mapping	438155	SNV	1	A	C	41	100	34.2927	Gene: FBgn0004583, Misc. feature: contig 2L_1_9 1..50000(1)
2L mapping	438191	SNV	1	A	C	31	100	33.6129	Gene: FBgn0004583, Misc. feature: contig 2L_1_9 1..50000(1)
2L mapping	438747	Deletion	1	G	-	16	93.75	35.8	Gene: FBgn0004583, Misc. feature: contig 2L_1_9 1..50000(1)	FBpp0077719:c.[238+20delG]; FBpp0302878:c.[238+20delG]
2L mapping	439086	SNV	1	G	A	35	100	34.7714	Gene: FBgn0004583, Misc. feature: contig 2L_1_9 1..50000(1)	FBpp0077719:c.[238+359G>A]; FBpp0302878:c.[238+359G>A]
2L mapping	440601	SNV	1	T	A	37	100	31.7568	Gene: FBgn0004583, Misc. feature: contig 2L_1_9 1..50000(1)	FBpp0077719:c.[238+1874T>A]; FBpp0302878:c.[238+1874T>A]
2L mapping	442260	SNV	1	G	C	52	100	34.75	Gene: FBgn0004583, Misc. feature: contig 2L_1_9 1..50000(1)	FBpp0302878:c.[239-822G>C]; FBpp0077719:c.[239-822G>C]
2L mapping	443477	SNV	1	A	G	44	100	35.6591	CDS: FBgn0004583, CDS: FBgn0004583, Exon: Exon, Gene: FBgn0004583, Misc. feature: contig 2L_1_9 1..50000(1), mRNA: FBgn0004583, mRNA: FBgn0004583	FBpp0077719:c.[570A>G]; FBpp0302878:c.[570A>G]
2L mapping	443488	SNV	1	C	T	45	100	34.4889	CDS: FBgn0004583, CDS: FBgn0004583, Exon: Exon, Gene: FBgn0004583, Misc. feature: contig 2L_1_9 1..50000(1), mRNA: FBgn0004583, mRNA: FBgn0004583	FBpp0077719:c.[581C>T]; FBpp0302878:c.[581C>T]	FBpp0077719:p.[Ser194Leu]; FBpp0302878:p.[Ser194Leu]
2L mapping	443558	SNV	1	T	C	40	100	33.95	CDS: FBgn0004583, CDS: FBgn0004583, Exon: Exon, Gene: FBgn0004583, Misc. feature: contig 2L_1_9 1..50000(1), mRNA: FBgn0004583, mRNA: FBgn0004583	FBpp0302878:c.[651T>C]; FBpp0077719:c.[651T>C]
2L mapping	444984	MNV	2	CA	TC	50	98	33.8673	CDS: FBgn0004583, CDS: FBgn0004583, Exon: Exon, Gene: FBgn0004583, Misc. feature: contig 2L_1_9 1..50000(1), mRNA: FBgn0004583, mRNA: FBgn0004583	FBpp0302878:c.[2077_2078delCAinsTC]; FBpp0077719:c.[2077_2078delCAinsTC]	FBpp0302878:p.[Gln693Ser]; FBpp0077719:p.[Gln693Ser]
2L mapping	447214	Insertion	6	-	CAGCAG	37	43.2432	35.6354	CDS: FBgn0004583, CDS: FBgn0004583, Exon: Exon, Gene: FBgn0004583, Misc. feature: contig 2L_1_9 1..50000(1), mRNA: FBgn0004583, mRNA: FBgn0004583	FBpp0302878:c.[4248_4249insCAGCAG]; FBpp0077719:c.[4248_4249insCAGCAG]	FBpp0302878:p.[Gln1422_His1423insGlnGln]; FBpp0077719:p.[Gln1422_His1423insGlnGln]
2L mapping	447525	SNV	1	A	G	47	100	36.7447	Exon: Exon, Gene: FBgn0004583, Misc. feature: contig 2L_1_9 1..50000(1), mRNA: FBgn0004583, mRNA: FBgn0004583
2L mapping	447687	SNV	1	G	C	56	100	35.3571	Exon: Exon, Gene: FBgn0004583, Misc. feature: contig 2L_1_9 1..50000(1), mRNA: FBgn0004583, mRNA: FBgn0004583
2L mapping	448435	Insertion	2	-	TA	37	83.7838	34.629	Exon: Exon, Exon: Exon, Gene: FBgn0004583, Gene: FBgn0015924, Misc. feature: contig 2L_1_9 1..50000(1), mRNA: FBgn0004583, mRNA: FBgn0004583, mRNA: FBgn0015924, mRNA: FBgn0015924
2L mapping	448809	Deletion	1	A	-	46	76.087	30.6286	Exon: Exon, Exon: Exon, Gene: FBgn0015924, Misc. feature: contig 2L_1_9 1..50000(1), mRNA: FBgn0015924, mRNA: FBgn0015924, mRNA: FBgn0015924, mRNA: FBgn0015924, mRNA: FBgn0015924
2L mapping	448813	SNV	1	T	G	43	83.7209	32.9167	Exon: Exon, Exon: Exon, Gene: FBgn0015924, Misc. feature: contig 2L_1_9 1..50000(1), mRNA: FBgn0015924, mRNA: FBgn0015924, mRNA: FBgn0015924, mRNA: FBgn0015924, mRNA: FBgn0015924
2L mapping	449545	SNV	1	C	T	30	100	34.1	CDS: FBgn0015924, CDS: FBgn0015924, CDS: FBgn0015924, CDS: FBgn0015924, CDS: FBgn0015924, Exon: Exon, Gene: FBgn0015924, Misc. feature: contig 2L_1_9 1..50000(1), mRNA: FBgn0015924, mRNA: FBgn0015924, mRNA: FBgn0015924, mRNA: FBgn0015924, mRNA: FBgn0015924	FBpp0077748:c.[1125G>A]; FBpp0303674:c.[1125G>A]; FBpp0293283:c.[1125G>A]; FBpp0077747:c.[1125G>A]; FBpp0303675:c.[1125G>A]
2L mapping	449931	SNV	1	A	C	32	100	32.875	CDS: FBgn0015924, CDS: FBgn0015924, CDS: FBgn0015924, CDS: FBgn0015924, CDS: FBgn0015924, Exon: Exon, Gene: FBgn0015924, Misc. feature: contig 2L_1_9 1..50000(1), mRNA: FBgn0015924, mRNA: FBgn0015924, mRNA: FBgn0015924, mRNA: FBgn0015924, mRNA: FBgn0015924	FBpp0303674:c.[739T>G]; FBpp0293283:c.[739T>G]; FBpp0077748:c.[739T>G]; FBpp0303675:c.[739T>G]; FBpp0077747:c.[739T>G]	FBpp0303674:p.[Ser247Ala]; FBpp0293283:p.[Ser247Ala]; FBpp0077748:p.[Ser247Ala]; FBpp0303675:p.[Ser247Ala]; FBpp0077747:p.[Ser247Ala]
2L mapping	450585	Insertion	1	-	T	39	53.8462	34.2857	Gene: FBgn0015924, Misc. feature: contig 2L_1_10 1..50000(1)	FBpp0077748:c.[130-45_130-44insA]; FBpp0077747:c.[130-45_130-44insA]; FBpp0303674:c.[130-45_130-44insA]; FBpp0293283:c.[130-45_130-44insA]; FBpp0303675:c.[130-45_130-44insA]
2L mapping	451312	SNV	1	G	T	38	100	34.3421	Gene: FBgn0015924, Misc. feature: contig 2L_1_10 1..50000(1)
2L mapping	452159	SNV	1	T	G	39	97.4359	35.7105	Gene: FBgn0015924, Misc. feature: contig 2L_1_10 1..50000(1)
2L mapping	452273	SNV	1	C	T	42	100	36.619	Gene: FBgn0015924, Misc. feature: contig 2L_1_10 1..50000(1)
2L mapping	452292	Insertion	1	-	T	36	36.1111	34.9231	Gene: FBgn0015924, Misc. feature: contig 2L_1_10 1..50000(1)
2L mapping	452295	SNV	1	A	T	32	59.375	36.5789	Gene: FBgn0015924, Misc. feature: contig 2L_1_10 1..50000(1)
2L mapping	452296	Insertion	10	-	GCATGCACTT	32	40.625	36.2769	Gene: FBgn0015924, Misc. feature: contig 2L_1_10 1..50000(1)
2L mapping	455401	SNV	1	T	A	14	100	36.4286	Misc. feature: contig 2L_1_10 1..50000(1)
2L mapping	455724	SNV	1	A	G	42	100	34.8333	Exon: Exon, Gene: FBgn0031257, Misc. feature: contig 2L_1_10 1..50000(1), mRNA: FBgn0031257, mRNA: FBgn0031257, mRNA: FBgn0031257
2L mapping	455768	SNV	1	C	A	49	100	33.7143	Exon: Exon, Gene: FBgn0031257, Misc. feature: contig 2L_1_10 1..50000(1), mRNA: FBgn0031257, mRNA: FBgn0031257, mRNA: FBgn0031257
2L mapping	456097	SNV	1	C	T	43	100	34	CDS: FBgn0031257, CDS: FBgn0031257, CDS: FBgn0031257, Exon: Exon, Gene: FBgn0031257, Misc. feature: contig 2L_1_10 1..50000(1), mRNA: FBgn0031257, mRNA: FBgn0031257, mRNA: FBgn0031257	FBpp0303673:c.[39C>T]; FBpp0303672:c.[39C>T]; FBpp0077721:c.[39C>T]
2L mapping	456516	SNV	1	C	T	37	100	34.8649	Gene: FBgn0031257, Misc. feature: contig 2L_1_10 1..50000(1)	FBpp0077721:c.[346-23C>T]; FBpp0303673:c.[346-23C>T]; FBpp0303672:c.[346-23C>T]
2L mapping	456595	SNV	1	T	C	34	100	35.0882	CDS: FBgn0031257, CDS: FBgn0031257, CDS: FBgn0031257, Exon: Exon, Gene: FBgn0031257, Misc. feature: contig 2L_1_10 1..50000(1), mRNA: FBgn0031257, mRNA: FBgn0031257, mRNA: FBgn0031257	FBpp0303673:c.[402T>C]; FBpp0303672:c.[402T>C]; FBpp0077721:c.[402T>C]
2L mapping	456734	Deletion	4	GTTC	-	28	89.2857	33.12	Gene: FBgn0031257, Misc. feature: contig 2L_1_10 1..50000(1)	FBpp0303672:c.[536+5_536+8delGTTC]; FBpp0303673:c.[536+5_536+8delGTTC]; FBpp0077721:c.[536+5_536+8delGTTC]
2L mapping	457296	SNV	1	T	C	29	96.5517	34.2143	CDS: FBgn0031257, CDS: FBgn0031257, CDS: FBgn0031257, Exon: Exon, Exon: Exon, Gene: FBgn0031257, Misc. feature: contig 2L_1_10 1..50000(1), mRNA: FBgn0031257, mRNA: FBgn0031257, mRNA: FBgn0031257	FBpp0303673:c.[1036T>C]; FBpp0303672:c.[961T>C]; FBpp0077721:c.[1036T>C]
2L mapping	457354	SNV	1	G	T	29	100	30.8276	Gene: FBgn0031257, Misc. feature: contig 2L_1_10 1..50000(1)	FBpp0303672:c.[1003+16G>T]; FBpp0303673:c.[1078+16G>T]; FBpp0077721:c.[1078+16G>T]
2L mapping	457584	SNV	1	G	T	27	88.8889	33.5	Gene: FBgn0031257, Misc. feature: contig 2L_1_10 1..50000(1)	FBpp0077721:c.[1241+22G>T]; FBpp0303672:c.[1166+22G>T]; FBpp0303673:c.[1241+22G>T]
2L mapping	459470	SNV	1	C	T	48	100	35.875	Exon: Exon, Gene: FBgn0031258, Misc. feature: contig 2L_1_10 1..50000(1), mRNA: FBgn0031258, mRNA: FBgn0031258
2L mapping	459604	SNV	1	C	T	53	100	34.8113	Exon: Exon, Gene: FBgn0031258, Misc. feature: contig 2L_1_10 1..50000(1), mRNA: FBgn0031258, mRNA: FBgn0031258
2L mapping	461383	SNV	1	C	T	39	100	34.4615	CDS: FBgn0031258, CDS: FBgn0031258, Exon: Exon, Gene: FBgn0031258, Misc. feature: contig 2L_1_10 1..50000(1), mRNA: FBgn0031258, mRNA: FBgn0031258	FBpp0301737:c.[3551G>A]; FBpp0301738:c.[3551G>A]	FBpp0301737:p.[Ser1184Asn]; FBpp0301738:p.[Ser1184Asn]
2L mapping	461802	SNV	1	T	C	48	100	35.9792	CDS: FBgn0031258, CDS: FBgn0031258, Exon: Exon, Gene: FBgn0031258, Misc. feature: contig 2L_1_10 1..50000(1), mRNA: FBgn0031258, mRNA: FBgn0031258	FBpp0301737:c.[3132A>G]; FBpp0301738:c.[3132A>G]
2L mapping	462741	SNV	1	T	C	46	100	33.7826	CDS: FBgn0031258, CDS: FBgn0031258, Exon: Exon, Gene: FBgn0031258, Misc. feature: contig 2L_1_10 1..50000(1), mRNA: FBgn0031258, mRNA: FBgn0031258	FBpp0301738:c.[2193A>G]; FBpp0301737:c.[2193A>G]
2L mapping	462744	SNV	1	G	A	45	100	33.6444	CDS: FBgn0031258, CDS: FBgn0031258, Exon: Exon, Gene: FBgn0031258, Misc. feature: contig 2L_1_10 1..50000(1), mRNA: FBgn0031258, mRNA: FBgn0031258	FBpp0301738:c.[2190C>T]; FBpp0301737:c.[2190C>T]
2L mapping	463786	SNV	1	G	T	30	36.6667	32.3636	CDS: FBgn0031258, CDS: FBgn0031258, Exon: Exon, Gene: FBgn0031258, Misc. feature: contig 2L_1_10 1..50000(1), mRNA: FBgn0031258, mRNA: FBgn0031258	FBpp0301737:c.[1148C>A]; FBpp0301738:c.[1148C>A]	FBpp0301737:p.[Pro383His]; FBpp0301738:p.[Pro383His]
2L mapping	463791	SNV	1	A	G	29	41.3793	34.6667	CDS: FBgn0031258, CDS: FBgn0031258, Exon: Exon, Gene: FBgn0031258, Misc. feature: contig 2L_1_10 1..50000(1), mRNA: FBgn0031258, mRNA: FBgn0031258	FBpp0301738:c.[1143T>C]; FBpp0301737:c.[1143T>C]
2L mapping	463800	SNV	1	C	T	13	100	30.8462	CDS: FBgn0031258, CDS: FBgn0031258, Exon: Exon, Gene: FBgn0031258, Misc. feature: contig 2L_1_10 1..50000(1), mRNA: FBgn0031258, mRNA: FBgn0031258	FBpp0301738:c.[1134G>A]; FBpp0301737:c.[1134G>A]
2L mapping	463806	MNV	2	AG	TC	19	94.7368	31.3889	CDS: FBgn0031258, CDS: FBgn0031258, Exon: Exon, Gene: FBgn0031258, Misc. feature: contig 2L_1_10 1..50000(1), mRNA: FBgn0031258, mRNA: FBgn0031258	FBpp0301738:c.[1127_1128delCTinsGA]; FBpp0301737:c.[1127_1128delCTinsGA]	FBpp0301738:p.[Ala376Gly]; FBpp0301737:p.[Ala376Gly]
2L mapping	465374	SNV	1	A	G	40	100	32.9	Gene: FBgn0031258, Misc. feature: contig 2L_1_10 1..50000(1)
2L mapping	467431	SNV	1	C	G	14	100	35.7143	Gene: FBgn0031258, Misc. feature: contig 2L_1_10 1..50000(1)
2L mapping	467663	SNV	1	A	G	51	100	34.3333	Gene: FBgn0031258, Misc. feature: contig 2L_1_10 1..50000(1)
2L mapping	467676	SNV	1	A	C	50	100	35.48	Gene: FBgn0031258, Misc. feature: contig 2L_1_10 1..50000(1)
2L mapping	467685	SNV	1	C	G	47	100	34.0638	Gene: FBgn0031258, Misc. feature: contig 2L_1_10 1..50000(1)
2L mapping	467704	SNV	1	G	T	44	100	34.4091	Gene: FBgn0031258, Misc. feature: contig 2L_1_10 1..50000(1)
2L mapping	467717	SNV	1	C	T	42	97.619	34.8049	Gene: FBgn0031258, Misc. feature: contig 2L_1_10 1..50000(1)
2L mapping	467813	SNV	1	C	G	58	100	35.2931	Gene: FBgn0031258, Misc. feature: contig 2L_1_10 1..50000(1)
2L mapping	468585	SNV	1	T	C	49	100	34.5102	Gene: FBgn0031258, Misc. feature: contig 2L_1_10 1..50000(1)
2L mapping	468651	SNV	1	C	G	38	100	33.3684	Gene: FBgn0031258, Misc. feature: contig 2L_1_10 1..50000(1)
2L mapping	468936	SNV	1	C	A	38	100	34.9737	Gene: FBgn0031258, Misc. feature: contig 2L_1_10 1..50000(1)
2L mapping	469414	SNV	1	A	C	45	100	35.8	Gene: FBgn0031258, Misc. feature: contig 2L_1_10 1..50000(1)
2L mapping	469446	SNV	1	G	A	45	100	36.3111	Gene: FBgn0031258, Misc. feature: contig 2L_1_10 1..50000(1)
2L mapping	469453	SNV	1	A	G	40	100	36.25	Gene: FBgn0031258, Misc. feature: contig 2L_1_10 1..50000(1)
2L mapping	469685	SNV	1	T	G	53	100	36.1509	Gene: FBgn0031258, Misc. feature: contig 2L_1_10 1..50000(1)
2L mapping	469710	SNV	1	T	C	55	100	34.6364	Gene: FBgn0031258, Misc. feature: contig 2L_1_10 1..50000(1)
2L mapping	469732	SNV	1	C	T	64	95.3125	35.4098	Gene: FBgn0031258, Misc. feature: contig 2L_1_10 1..50000(1)
2L mapping	469734	SNV	1	T	A	64	95.3125	34.7705	Gene: FBgn0031258, Misc. feature: contig 2L_1_10 1..50000(1)
2L mapping	469763	SNV	1	T	A	63	100	34.7778	Gene: FBgn0031258, Misc. feature: contig 2L_1_10 1..50000(1)
2L mapping	469941	SNV	1	A	G	43	100	34.0233	Gene: FBgn0031258, Misc. feature: contig 2L_1_10 1..50000(1)
2L mapping	470063	Deletion	9	ACTAATTTG	-	44	70.4545	33.5484	Gene: FBgn0031258, Misc. feature: contig 2L_1_10 1..50000(1)
2L mapping	470163	SNV	1	C	T	39	100	34.2308	Gene: FBgn0031258, Misc. feature: contig 2L_1_10 1..50000(1)
2L mapping	470546	SNV	1	G	T	37	100	32.973	Gene: FBgn0031258, Misc. feature: contig 2L_1_10 1..50000(1)
2L mapping	470557	Deletion	1	A	-	37	78.3784	32.6207	Gene: FBgn0031258, Misc. feature: contig 2L_1_10 1..50000(1)
2L mapping	470570	SNV	1	A	C	36	100	33.3333	Gene: FBgn0031258, Misc. feature: contig 2L_1_10 1..50000(1)
2L mapping	470674	SNV	1	A	T	31	100	36.1613	Gene: FBgn0031258, Misc. feature: contig 2L_1_10 1..50000(1)
2L mapping	470730	Deletion	1	A	-	33	42.4242	34.3571	Gene: FBgn0031258, Misc. feature: contig 2L_1_10 1..50000(1)
2L mapping	470758	SNV	1	G	A	38	97.3684	34.027	Gene: FBgn0031258, Misc. feature: contig 2L_1_10 1..50000(1)
2L mapping	471065	Deletion	2	AA	-	30	93.3333	34.9643	Gene: FBgn0031258, Misc. feature: contig 2L_1_10 1..50000(1)
2L mapping	471163	SNV	1	C	G	53	100	34.8868	Gene: FBgn0031258, Misc. feature: contig 2L_1_10 1..50000(1)
2L mapping	471186	SNV	1	T	C	46	100	35.0652	Gene: FBgn0031258, Misc. feature: contig 2L_1_10 1..50000(1)
2L mapping	471468	SNV	1	G	T	34	100	35.2941	Exon: Exon, Exon: Exon, Gene: FBgn0031258, Misc. feature: contig 2L_1_10 1..50000(1), mRNA: FBgn0031258, mRNA: FBgn0031258
2L mapping	471558	Insertion	1	-	T	50	92	34.9348	Exon: Exon, Gene: FBgn0031258, Misc. feature: contig 2L_1_10 1..50000(1), mRNA: FBgn0031258
2L mapping	471594	Deletion	1	T	-	60	85	34.1569	Exon: Exon, Gene: FBgn0031258, Misc. feature: contig 2L_1_10 1..50000(1), mRNA: FBgn0031258
2L mapping	471761	SNV	1	C	G	38	100	35.3158	Exon: Exon, Gene: FBgn0031258, Misc. feature: contig 2L_1_10 1..50000(1), mRNA: FBgn0031258
2L mapping	472340	SNV	1	C	A	44	97.7273	35.5349	Misc. feature: contig 2L_1_10 1..50000(1)
2L mapping	472498	SNV	1	T	C	43	100	34.1163	Misc. feature: contig 2L_1_10 1..50000(1)
2L mapping	472514	SNV	1	G	A	50	100	35.66	Misc. feature: contig 2L_1_10 1..50000(1)
2L mapping	472671	Insertion	1	-	T	42	100	36.3571	Misc. feature: contig 2L_1_10 1..50000(1)
2L mapping	472820	Insertion	3	-	TTT	45	68.8889	35.9462	Misc. feature: contig 2L_1_10 1..50000(1)
2L mapping	472837	SNV	1	C	T	37	100	35.2162	Misc. feature: contig 2L_1_10 1..50000(1)
2L mapping	472960	SNV	1	C	A	75	98.6667	35.527	Misc. feature: contig 2L_1_10 1..50000(1)
2L mapping	472967	SNV	1	T	A	66	98.4848	35.3385	Misc. feature: contig 2L_1_10 1..50000(1)
2L mapping	473033	SNV	1	C	G	64	100	36.2812	Exon: Exon, Gene: FBgn0027592, Misc. feature: contig 2L_1_10 1..50000(1), mRNA: FBgn0027592
2L mapping	473195	Deletion	3	AGT	-	75	88	34.0303	Gene: FBgn0027592, Misc. feature: contig 2L_1_10 1..50000(1)	FBpp0077722:c.54-28_54-26delAGT
2L mapping	473293	SNV	1	C	A	73	98.6301	35.9722	CDS: FBgn0027592, Exon: Exon, Gene: FBgn0027592, Misc. feature: contig 2L_1_10 1..50000(1), mRNA: FBgn0027592	FBpp0077722:c.124C>A
2L mapping	475195	SNV	1	C	T	56	100	34.875	Gene: FBgn0027592, Misc. feature: contig 2L_1_10 1..50000(1)	FBpp0077722:c.1680+17C>T
2L mapping	475206	SNV	1	A	T	64	100	34.0312	Gene: FBgn0027592, Misc. feature: contig 2L_1_10 1..50000(1)	FBpp0077722:c.1681-27A>T
2L mapping	475299	SNV	1	T	C	62	100	35.7903	CDS: FBgn0027592, Exon: Exon, Gene: FBgn0027592, Misc. feature: contig 2L_1_10 1..50000(1), mRNA: FBgn0027592	FBpp0077722:c.1747T>C
2L mapping	475500	SNV	1	G	A	66	100	34.3788	CDS: FBgn0027592, Exon: Exon, Gene: FBgn0027592, Misc. feature: contig 2L_1_10 1..50000(1), mRNA: FBgn0027592	FBpp0077722:c.1948G>A	FBpp0077722:p.Ala650Thr
2L mapping	475533	SNV	1	A	C	60	100	34.1333	CDS: FBgn0027592, Exon: Exon, Gene: FBgn0027592, Misc. feature: contig 2L_1_10 1..50000(1), mRNA: FBgn0027592	FBpp0077722:c.1981A>C
2L mapping	475902	SNV	1	C	G	75	100	35.1867	Gene: FBgn0027592, Misc. feature: contig 2L_1_10 1..50000(1)
2L mapping	476369	Deletion	1	A	-	65	86.1538	36	Gene: FBgn0003963, Misc. feature: contig 2L_1_10 1..50000(1)
2L mapping	476373	SNV	1	A	G	60	96.6667	35.5172	Gene: FBgn0003963, Misc. feature: contig 2L_1_10 1..50000(1)
2L mapping	476583	SNV	1	T	C	79	100	35.6962	Exon: Exon, Exon: Exon, Exon: Exon, Gene: FBgn0003963, Gene: FBgn0043364, Misc. feature: contig 2L_1_10 1..50000(1), mRNA: FBgn0043364, mRNA: FBgn0043364, mRNA: FBgn0043364
2L mapping	476624	SNV	1	A	G	81	61.7284	35.64	Exon: Exon, Exon: Exon, Exon: Exon, Gene: FBgn0003963, Gene: FBgn0043364, Misc. feature: contig 2L_1_10 1..50000(1), mRNA: FBgn0043364, mRNA: FBgn0043364, mRNA: FBgn0043364
2L mapping	476893	SNV	1	T	A	68	100	35.3529	Exon: Exon, Exon: Exon, Exon: Exon, Gene: FBgn0003963, Gene: FBgn0043364, Misc. feature: contig 2L_1_10 1..50000(1), mRNA: FBgn0043364, mRNA: FBgn0043364, mRNA: FBgn0043364
2L mapping	476905	SNV	1	A	C	65	100	34.8154	Exon: Exon, Exon: Exon, Exon: Exon, Gene: FBgn0003963, Gene: FBgn0043364, Misc. feature: contig 2L_1_10 1..50000(1), mRNA: FBgn0043364, mRNA: FBgn0043364, mRNA: FBgn0043364
2L mapping	476966	SNV	1	A	G	66	100	34.0909	Exon: Exon, Exon: Exon, Exon: Exon, Gene: FBgn0003963, Gene: FBgn0043364, Misc. feature: contig 2L_1_10 1..50000(1), mRNA: FBgn0043364, mRNA: FBgn0043364, mRNA: FBgn0043364
2L mapping	477659	SNV	1	C	T	74	100	33.0541	CDS: FBgn0043364, CDS: FBgn0043364, CDS: FBgn0043364, Exon: Exon, Exon: Exon, Exon: Exon, Gene: FBgn0003963, Gene: FBgn0043364, Misc. feature: contig 2L_1_10 1..50000(1), mRNA: FBgn0043364, mRNA: FBgn0043364, mRNA: FBgn0043364	FBpp0077744:c.[372G>A]; FBpp0077743:c.[615G>A]; FBpp0301733:c.[372G>A]
2L mapping	477712	SNV	1	T	C	65	100	33.9077	CDS: FBgn0043364, CDS: FBgn0043364, CDS: FBgn0043364, Exon: Exon, Exon: Exon, Exon: Exon, Gene: FBgn0003963, Gene: FBgn0043364, Misc. feature: contig 2L_1_10 1..50000(1), mRNA: FBgn0043364, mRNA: FBgn0043364, mRNA: FBgn0043364	FBpp0301733:c.[319A>G]; FBpp0077744:c.[319A>G]; FBpp0077743:c.[562A>G]	FBpp0301733:p.[Thr107Ala]; FBpp0077744:p.[Thr107Ala]; FBpp0077743:p.[Thr188Ala]
2L mapping	477926	SNV	1	A	G	66	100	35.1667	CDS: FBgn0043364, CDS: FBgn0043364, CDS: FBgn0043364, Exon: Exon, Exon: Exon, Exon: Exon, Gene: FBgn0003963, Gene: FBgn0043364, Misc. feature: contig 2L_1_10 1..50000(1), mRNA: FBgn0043364, mRNA: FBgn0043364, mRNA: FBgn0043364	FBpp0077744:c.[105T>C]; FBpp0301733:c.[105T>C]; FBpp0077743:c.[348T>C]
2L mapping	477980	SNV	1	C	A	61	100	33.9508	CDS: FBgn0043364, CDS: FBgn0043364, CDS: FBgn0043364, Exon: Exon, Exon: Exon, Exon: Exon, Gene: FBgn0003963, Gene: FBgn0043364, Misc. feature: contig 2L_1_10 1..50000(1), mRNA: FBgn0043364, mRNA: FBgn0043364, mRNA: FBgn0043364	FBpp0077743:c.[294G>T]; FBpp0301733:c.[51G>T]; FBpp0077744:c.[51G>T]
2L mapping	478456	SNV	1	T	A	75	98.6667	32.9595	Exon: Exon, Gene: FBgn0003963, Gene: FBgn0043364, Misc. feature: contig 2L_1_10 1..50000(1), mRNA: FBgn0043364	FBpp0077743:c.70-252A>T
2L mapping	478480	SNV	1	C	T	72	98.6111	35.1268	Exon: Exon, Gene: FBgn0003963, Gene: FBgn0043364, Misc. feature: contig 2L_1_10 1..50000(1), mRNA: FBgn0043364	FBpp0077743:c.70-276G>A
2L mapping	478661	SNV	1	C	T	87	100	33.046	Exon: Exon, Gene: FBgn0003963, Gene: FBgn0043364, Misc. feature: contig 2L_1_10 1..50000(1), mRNA: FBgn0043364	FBpp0077743:c.70-457G>A
2L mapping	478801	SNV	1	G	A	75	100	34.88	Exon: Exon, Gene: FBgn0003963, Gene: FBgn0043364, Misc. feature: contig 2L_1_10 1..50000(1), mRNA: FBgn0043364	FBpp0077743:c.70-597C>T
2L mapping	479111	Insertion	1	-	T	80	93.75	35.0267	Exon: Exon, Exon: Exon, Gene: FBgn0003963, Gene: FBgn0043364, Misc. feature: contig 2L_1_10 1..50000(1), mRNA: FBgn0043364, mRNA: FBgn0043364	FBpp0077743:c.69+296_69+297insA
2L mapping	480473	SNV	1	A	T	44	100	35.1364	Gene: FBgn0003963, Misc. feature: contig 2L_1_10 1..50000(1)
2L mapping	482074	SNV	1	G	C	76	100	32.8026	Gene: FBgn0003963, Misc. feature: contig 2L_1_10 1..50000(1)
2L mapping	482088	SNV	1	C	T	78	100	34.2949	Gene: FBgn0003963, Misc. feature: contig 2L_1_10 1..50000(1)
2L mapping	482353	MNV	2	GA	AG	52	98.0769	33.3922	Gene: FBgn0003963, Misc. feature: contig 2L_1_10 1..50000(1)
2L mapping	482547	SNV	1	A	G	64	100	36.0781	Gene: FBgn0003963, Misc. feature: contig 2L_1_10 1..50000(1)
2L mapping	482789	SNV	1	T	C	72	100	34.1389	Gene: FBgn0003963, Misc. feature: contig 2L_1_10 1..50000(1)
2L mapping	482813	SNV	1	A	C	78	100	35.4103	Gene: FBgn0003963, Misc. feature: contig 2L_1_10 1..50000(1)
2L mapping	482830	SNV	1	A	G	76	98.6842	33.5067	Gene: FBgn0003963, Misc. feature: contig 2L_1_10 1..50000(1)
2L mapping	482850	SNV	1	T	C	70	100	35.8429	Gene: FBgn0003963, Misc. feature: contig 2L_1_10 1..50000(1)
2L mapping	482856	SNV	1	A	G	68	100	35.3676	Gene: FBgn0003963, Misc. feature: contig 2L_1_10 1..50000(1)
2L mapping	482891	Insertion	1	-	C	61	91.8033	35.125	Gene: FBgn0003963, Misc. feature: contig 2L_1_10 1..50000(1)
2L mapping	482910	Insertion	2	-	GG	53	81.1321	34.593	Gene: FBgn0003963, Misc. feature: contig 2L_1_10 1..50000(1)
2L mapping	482941	SNV	1	A	G	52	100	34.7692	Gene: FBgn0003963, Misc. feature: contig 2L_1_10 1..50000(1)
2L mapping	482948	SNV	1	G	C	52	100	34.3462	Gene: FBgn0003963, Misc. feature: contig 2L_1_10 1..50000(1)
2L mapping	482959	SNV	1	A	C	58	100	34.9828	Gene: FBgn0003963, Misc. feature: contig 2L_1_10 1..50000(1)
2L mapping	482966	SNV	1	C	G	58	100	34.7586	Gene: FBgn0003963, Misc. feature: contig 2L_1_10 1..50000(1)
2L mapping	482978	SNV	1	T	C	65	98.4615	35.0938	Gene: FBgn0003963, Misc. feature: contig 2L_1_10 1..50000(1)
2L mapping	483204	SNV	1	A	G	71	98.5915	33.3143	Gene: FBgn0003963, Misc. feature: contig 2L_1_10 1..50000(1)
2L mapping	483234	SNV	1	T	C	74	100	35.4324	Gene: FBgn0003963, Misc. feature: contig 2L_1_10 1..50000(1)
2L mapping	483339	SNV	1	G	A	67	100	33.0448	Gene: FBgn0003963, Misc. feature: contig 2L_1_10 1..50000(1)
2L mapping	483363	MNV	2	AA	GG	66	100	34.8409	Gene: FBgn0003963, Misc. feature: contig 2L_1_10 1..50000(1)
2L mapping	483776	SNV	1	T	C	74	100	34	Gene: FBgn0003963, Misc. feature: contig 2L_1_10 1..50000(1)
2L mapping	483832	SNV	1	G	C	65	100	33.4462	Gene: FBgn0003963, Misc. feature: contig 2L_1_10 1..50000(1)
2L mapping	484284	SNV	1	T	C	69	100	34.5942	Gene: FBgn0003963, Misc. feature: contig 2L_1_10 1..50000(1)
2L mapping	484310	SNV	1	A	T	69	100	34.8696	Gene: FBgn0003963, Misc. feature: contig 2L_1_10 1..50000(1)
2L mapping	484458	SNV	1	G	A	48	100	32.625	Gene: FBgn0003963, Misc. feature: contig 2L_1_10 1..50000(1)
2L mapping	484625	SNV	1	G	C	58	100	33.5172	Gene: FBgn0003963, Misc. feature: contig 2L_1_10 1..50000(1)
2L mapping	484661	SNV	1	C	T	47	100	34.0851	Gene: FBgn0003963, Misc. feature: contig 2L_1_10 1..50000(1)
2L mapping	484690	SNV	1	A	G	43	100	34.7674	Gene: FBgn0003963, Misc. feature: contig 2L_1_10 1..50000(1)
2L mapping	485089	SNV	1	T	A	68	100	35.4853	Gene: FBgn0003963, Misc. feature: contig 2L_1_10 1..50000(1)
2L mapping	485176	SNV	1	C	T	83	100	35.4217	Gene: FBgn0003963, Misc. feature: contig 2L_1_10 1..50000(1)
2L mapping	485221	SNV	1	A	G	64	100	35.3438	Gene: FBgn0003963, Misc. feature: contig 2L_1_10 1..50000(1)
2L mapping	485234	SNV	1	G	A	62	100	35.0645	Gene: FBgn0003963, Misc. feature: contig 2L_1_10 1..50000(1)
2L mapping	485254	SNV	1	T	C	55	100	36.0727	Gene: FBgn0003963, Misc. feature: contig 2L_1_10 1..50000(1)
2L mapping	485256	SNV	1	C	A	55	100	35.6727	Gene: FBgn0003963, Misc. feature: contig 2L_1_10 1..50000(1)
2L mapping	485274	Deletion	7	CATCTGC	-	45	66.6667	35.3	Gene: FBgn0003963, Misc. feature: contig 2L_1_10 1..50000(1)
2L mapping	485315	SNV	1	C	T	68	100	34.4118	Gene: FBgn0003963, Misc. feature: contig 2L_1_10 1..50000(1)
2L mapping	485447	Deletion	6	AATCGG	-	58	67.2414	33.7179	Gene: FBgn0003963, Misc. feature: contig 2L_1_10 1..50000(1)
2L mapping	485558	SNV	1	T	G	50	100	34.64	Gene: FBgn0003963, Misc. feature: contig 2L_1_10 1..50000(1)
2L mapping	485575	SNV	1	C	G	49	100	35.1837	Gene: FBgn0003963, Misc. feature: contig 2L_1_10 1..50000(1)
2L mapping	486084	SNV	1	G	A	81	100	36.2346	Gene: FBgn0003963, Misc. feature: contig 2L_1_10 1..50000(1)
2L mapping	486094	SNV	1	T	C	77	98.7013	35.0921	Gene: FBgn0003963, Misc. feature: contig 2L_1_10 1..50000(1)
2L mapping	486135	SNV	1	C	T	72	100	34.3889	Gene: FBgn0003963, Misc. feature: contig 2L_1_10 1..50000(1)
2L mapping	486224	SNV	1	C	T	84	100	34.6905	Gene: FBgn0003963, Misc. feature: contig 2L_1_10 1..50000(1)
2L mapping	486327	SNV	1	A	T	57	96.4912	36.5273	Gene: FBgn0003963, Misc. feature: contig 2L_1_10 1..50000(1)
2L mapping	486338	Insertion	1	-	T	67	58.209	32.641	Gene: FBgn0003963, Misc. feature: contig 2L_1_10 1..50000(1)
2L mapping	486544	SNV	1	A	G	79	100	34.1899	Gene: FBgn0003963, Misc. feature: contig 2L_1_10 1..50000(1)
2L mapping	486594	SNV	1	T	G	61	100	33.4098	Gene: FBgn0003963, Misc. feature: contig 2L_1_10 1..50000(1)
2L mapping	486610	Deletion	1	T	-	75	37.3333	32.5357	Gene: FBgn0003963, Misc. feature: contig 2L_1_10 1..50000(1)
2L mapping	486613	SNV	1	A	G	72	38.8889	32.5	Gene: FBgn0003963, Misc. feature: contig 2L_1_10 1..50000(1)
2L mapping	486616	SNV	1	C	T	68	55.8824	34.2368	Gene: FBgn0003963, Misc. feature: contig 2L_1_10 1..50000(1)
2L mapping	486619	MNV	2	TC	GA	67	44.7761	33.6333	Gene: FBgn0003963, Misc. feature: contig 2L_1_10 1..50000(1)
2L mapping	486709	SNV	1	G	A	69	100	34.1884	Gene: FBgn0003963, Misc. feature: contig 2L_1_10 1..50000(1)
2L mapping	486712	SNV	1	G	A	74	100	33.7027	Gene: FBgn0003963, Misc. feature: contig 2L_1_10 1..50000(1)
2L mapping	486752	SNV	1	G	A	68	100	35.9853	Gene: FBgn0003963, Misc. feature: contig 2L_1_10 1..50000(1)
2L mapping	486783	SNV	1	T	C	67	100	34.7612	Gene: FBgn0003963, Misc. feature: contig 2L_1_10 1..50000(1)
2L mapping	486903	SNV	1	T	C	82	41.4634	36.1176	Gene: FBgn0003963, Misc. feature: contig 2L_1_10 1..50000(1)
2L mapping	486918	Insertion	1	-	C	59	100	33.6271	Gene: FBgn0003963, Misc. feature: contig 2L_1_10 1..50000(1)
2L mapping	486931	SNV	1	T	C	76	100	34.9079	Gene: FBgn0003963, Misc. feature: contig 2L_1_10 1..50000(1)
2L mapping	487074	Deletion	4	CTCT	-	52	44.2308	31.6957	Gene: FBgn0003963, Misc. feature: contig 2L_1_10 1..50000(1)
2L mapping	487356	SNV	1	T	A	58	100	35.0862	Gene: FBgn0003963, Misc. feature: contig 2L_1_10 1..50000(1)
2L mapping	487438	SNV	1	C	A	76	100	34.6053	Gene: FBgn0003963, Misc. feature: contig 2L_1_10 1..50000(1)
2L mapping	487472	SNV	1	T	C	73	98.6301	35.6111	Gene: FBgn0003963, Misc. feature: contig 2L_1_10 1..50000(1)
2L mapping	487477	SNV	1	A	G	71	98.5915	35.4	Gene: FBgn0003963, Misc. feature: contig 2L_1_10 1..50000(1)
2L mapping	487533	SNV	1	T	G	60	100	35.4333	Gene: FBgn0003963, Misc. feature: contig 2L_1_10 1..50000(1)
2L mapping	487536	SNV	1	T	G	61	100	34.5246	Gene: FBgn0003963, Misc. feature: contig 2L_1_10 1..50000(1)
2L mapping	487543	SNV	1	C	T	61	100	34.5082	Gene: FBgn0003963, Misc. feature: contig 2L_1_10 1..50000(1)
2L mapping	487637	SNV	1	T	A	80	100	34.8125	Gene: FBgn0003963, Misc. feature: contig 2L_1_10 1..50000(1)
2L mapping	487663	SNV	1	T	A	82	100	35.561	Gene: FBgn0003963, Misc. feature: contig 2L_1_10 1..50000(1)
2L mapping	487762	SNV	1	G	A	73	100	34.5205	Gene: FBgn0003963, Misc. feature: contig 2L_1_10 1..50000(1)
2L mapping	487892	SNV	1	C	G	71	100	34.3239	Gene: FBgn0003963, Misc. feature: contig 2L_1_10 1..50000(1)
2L mapping	488495	Deletion	7	TACTCTA	-	70	75.7143	35.434	Gene: FBgn0003963, Misc. feature: contig 2L_1_10 1..50000(1)
2L mapping	488639	SNV	1	C	T	97	100	35.0825	Gene: FBgn0003963, Misc. feature: contig 2L_1_10 1..50000(1)
2L mapping	488834	SNV	1	A	G	94	98.9362	34.6989	Gene: FBgn0003963, Misc. feature: contig 2L_1_10 1..50000(1)
2L mapping	488850	SNV	1	T	C	92	100	34.3913	Gene: FBgn0003963, Misc. feature: contig 2L_1_10 1..50000(1)
2L mapping	489733	SNV	1	C	A	91	100	35.0879	Exon: Exon, Gene: FBgn0003963, Misc. feature: contig 2L_1_10 1..50000(1), mRNA: FBgn0003963
2L mapping	489781	SNV	1	T	C	80	100	34.875	Exon: Exon, Gene: FBgn0003963, Misc. feature: contig 2L_1_10 1..50000(1), mRNA: FBgn0003963
2L mapping	489853	SNV	1	C	T	60	98.3333	33.6102	Exon: Exon, Gene: FBgn0003963, Misc. feature: contig 2L_1_10 1..50000(1), mRNA: FBgn0003963
2L mapping	489877	SNV	1	A	G	67	100	34.0448	Exon: Exon, Gene: FBgn0003963, Misc. feature: contig 2L_1_10 1..50000(1), mRNA: FBgn0003963
2L mapping	490087	SNV	1	C	G	94	98.9362	36.086	Exon: Exon, Gene: FBgn0003963, Misc. feature: contig 2L_1_10 1..50000(1), mRNA: FBgn0003963
2L mapping	490347	SNV	1	G	T	119	100	33.7059	Exon: Exon, Gene: FBgn0003963, Misc. feature: contig 2L_1_10 1..50000(1), mRNA: FBgn0003963
2L mapping	490358	SNV	1	T	A	118	100	34.7373	Exon: Exon, Gene: FBgn0003963, Misc. feature: contig 2L_1_10 1..50000(1), mRNA: FBgn0003963
2L mapping	490406	SNV	1	C	G	114	100	34.9825	Exon: Exon, Gene: FBgn0003963, Misc. feature: contig 2L_1_10 1..50000(1), mRNA: FBgn0003963
2L mapping	490429	SNV	1	G	T	101	99.0099	34.61	Exon: Exon, Gene: FBgn0003963, Misc. feature: contig 2L_1_10 1..50000(1), mRNA: FBgn0003963
2L mapping	490431	SNV	1	G	A	101	100	35.3663	Exon: Exon, Gene: FBgn0003963, Misc. feature: contig 2L_1_10 1..50000(1), mRNA: FBgn0003963
2L mapping	490442	SNV	1	C	T	98	100	34.0102	Exon: Exon, Gene: FBgn0003963, Misc. feature: contig 2L_1_10 1..50000(1), mRNA: FBgn0003963
2L mapping	490460	SNV	1	T	C	107	100	35.2336	Exon: Exon, Gene: FBgn0003963, Misc. feature: contig 2L_1_10 1..50000(1), mRNA: FBgn0003963
2L mapping	490469	SNV	1	G	C	108	100	34.1944	Exon: Exon, Gene: FBgn0003963, Misc. feature: contig 2L_1_10 1..50000(1), mRNA: FBgn0003963
2L mapping	490474	SNV	1	A	T	111	100	34.3153	Exon: Exon, Gene: FBgn0003963, Misc. feature: contig 2L_1_10 1..50000(1), mRNA: FBgn0003963
2L mapping	490477	SNV	1	T	A	107	100	34.3645	Exon: Exon, Gene: FBgn0003963, Misc. feature: contig 2L_1_10 1..50000(1), mRNA: FBgn0003963
2L mapping	490491	MNV	2	TT	AG	73	100	36.5685	Exon: Exon, Gene: FBgn0003963, Misc. feature: contig 2L_1_10 1..50000(1), mRNA: FBgn0003963
2L mapping	490496	MNV	2	TG	GC	73	100	35.3562	Exon: Exon, Gene: FBgn0003963, Misc. feature: contig 2L_1_10 1..50000(1), mRNA: FBgn0003963
2L mapping	490501	Replacement	3	AA	TTT	73	95.8904	35.3952	Exon: Exon, Gene: FBgn0003963, Misc. feature: contig 2L_1_10 1..50000(1), mRNA: FBgn0003963
2L mapping	490506	SNV	1	T	A	104	70.1923	35.8082	Exon: Exon, Gene: FBgn0003963, Misc. feature: contig 2L_1_10 1..50000(1), mRNA: FBgn0003963
2L mapping	490509	SNV	1	C	T	104	69.2308	36.1389	Exon: Exon, Gene: FBgn0003963, Misc. feature: contig 2L_1_10 1..50000(1), mRNA: FBgn0003963
2L mapping	490532	SNV	1	G	A	109	100	34.945	Exon: Exon, Gene: FBgn0003963, Misc. feature: contig 2L_1_10 1..50000(1), mRNA: FBgn0003963
2L mapping	490536	SNV	1	C	T	108	100	34.3704	Exon: Exon, Gene: FBgn0003963, Misc. feature: contig 2L_1_10 1..50000(1), mRNA: FBgn0003963
2L mapping	490542	MNV	2	CG	TC	93	100	34.9462	Exon: Exon, Gene: FBgn0003963, Misc. feature: contig 2L_1_10 1..50000(1), mRNA: FBgn0003963
2L mapping	490546	SNV	1	A	C	101	97.0297	35.3163	Exon: Exon, Gene: FBgn0003963, Misc. feature: contig 2L_1_10 1..50000(1), mRNA: FBgn0003963
2L mapping	490549	SNV	1	T	A	101	96.0396	35.4742	Exon: Exon, Gene: FBgn0003963, Misc. feature: contig 2L_1_10 1..50000(1), mRNA: FBgn0003963
2L mapping	490560	SNV	1	G	T	101	100	35.0297	Exon: Exon, Gene: FBgn0003963, Misc. feature: contig 2L_1_10 1..50000(1), mRNA: FBgn0003963
2L mapping	490567	SNV	1	T	G	99	100	33.3535	Exon: Exon, Gene: FBgn0003963, Misc. feature: contig 2L_1_10 1..50000(1), mRNA: FBgn0003963
2L mapping	490570	SNV	1	T	C	97	100	34.1237	Exon: Exon, Gene: FBgn0003963, Misc. feature: contig 2L_1_10 1..50000(1), mRNA: FBgn0003963
2L mapping	490653	SNV	1	G	A	98	100	35.4898	Exon: Exon, Gene: FBgn0003963, Misc. feature: contig 2L_1_10 1..50000(1), mRNA: FBgn0003963
2L mapping	490664	SNV	1	A	T	97	100	35.8866	Exon: Exon, Gene: FBgn0003963, Misc. feature: contig 2L_1_10 1..50000(1), mRNA: FBgn0003963
2L mapping	490666	SNV	1	A	C	97	100	35.1649	Exon: Exon, Gene: FBgn0003963, Misc. feature: contig 2L_1_10 1..50000(1), mRNA: FBgn0003963
2L mapping	490743	SNV	1	T	C	91	64.8352	32.7627	Exon: Exon, Gene: FBgn0003963, Misc. feature: contig 2L_1_10 1..50000(1), mRNA: FBgn0003963
2L mapping	490745	MNV	2	CC	TA	91	63.7363	33.9052	Exon: Exon, Gene: FBgn0003963, Misc. feature: contig 2L_1_10 1..50000(1), mRNA: FBgn0003963
2L mapping	490748	SNV	1	A	C	91	65.9341	35.1333	Exon: Exon, Gene: FBgn0003963, Misc. feature: contig 2L_1_10 1..50000(1), mRNA: FBgn0003963
2L mapping	490759	Insertion	2	-	TA	84	66.6667	34.2054	Exon: Exon, Gene: FBgn0003963, Misc. feature: contig 2L_1_10 1..50000(1), mRNA: FBgn0003963
2L mapping	490770	SNV	1	T	C	87	100	34.977	Exon: Exon, Gene: FBgn0003963, Misc. feature: contig 2L_1_10 1..50000(1), mRNA: FBgn0003963
2L mapping	490786	Deletion	1	G	-	87	91.954	33.5	Exon: Exon, Gene: FBgn0003963, Misc. feature: contig 2L_1_10 1..50000(1), mRNA: FBgn0003963
2L mapping	490936	SNV	1	T	C	83	98.7952	35.2805	Exon: Exon, Exon: Exon, Gene: FBgn0003963, Misc. feature: contig 2L_1_10 1..50000(1), mRNA: FBgn0003963, mRNA: FBgn0003963
2L mapping	491097	SNV	1	G	A	88	100	34.7955	Exon: Exon, Exon: Exon, Gene: FBgn0003963, Misc. feature: contig 2L_1_10 1..50000(1), mRNA: FBgn0003963, mRNA: FBgn0003963
2L mapping	491270	SNV	1	C	T	90	100	35.3	Exon: Exon, Exon: Exon, Gene: FBgn0003963, Misc. feature: contig 2L_1_10 1..50000(1), mRNA: FBgn0003963, mRNA: FBgn0003963
2L mapping	491364	SNV	1	C	T	85	98.8235	32.3929	Gene: FBgn0003963, Misc. feature: contig 2L_1_10 1..50000(1)	FBpp0301730:c.[43+6C>T]; FBpp0305228:c.[43+6C>T]
2L mapping	491408	SNV	1	C	A	95	100	35.5158	Gene: FBgn0003963, Misc. feature: contig 2L_1_10 1..50000(1)	FBpp0305228:c.[43+50C>A]; FBpp0301730:c.[43+50C>A]
2L mapping	491740	SNV	1	C	A	94	100	35.7447	Gene: FBgn0003963, Misc. feature: contig 2L_1_10 1..50000(1)	FBpp0301730:c.[43+382C>A]; FBpp0305228:c.[43+382C>A]
2L mapping	491824	SNV	1	G	T	92	100	34.2283	Gene: FBgn0003963, Misc. feature: contig 2L_1_10 1..50000(1)	FBpp0305228:c.[43+466G>T]; FBpp0301730:c.[43+466G>T]
2L mapping	491866	SNV	1	C	A	98	100	34.9286	Gene: FBgn0003963, Misc. feature: contig 2L_1_10 1..50000(1)	FBpp0301730:c.[43+508C>A]; FBpp0305228:c.[43+508C>A]
2L mapping	491870	SNV	1	G	C	92	100	34.7935	Gene: FBgn0003963, Misc. feature: contig 2L_1_10 1..50000(1)	FBpp0305228:c.[43+512G>C]; FBpp0301730:c.[43+512G>C]
2L mapping	491883	SNV	1	T	A	90	98.8889	35.6517	Gene: FBgn0003963, Misc. feature: contig 2L_1_10 1..50000(1)	FBpp0301730:c.[43+525T>A]; FBpp0305228:c.[43+525T>A]
2L mapping	492267	SNV	1	T	C	86	98.8372	33.7765	Gene: FBgn0003963, Misc. feature: contig 2L_1_10 1..50000(1)	FBpp0301730:c.[43+909T>C]; FBpp0305228:c.[43+909T>C]
2L mapping	492810	SNV	1	C	T	113	95.5752	35.8333	Gene: FBgn0003963, Misc. feature: contig 2L_1_10 1..50000(1)	FBpp0305228:c.[43+1452C>T]; FBpp0301730:c.[43+1452C>T]
2L mapping	492829	SNV	1	C	G	94	100	34.5	Gene: FBgn0003963, Misc. feature: contig 2L_1_10 1..50000(1)	FBpp0305228:c.[43+1471C>G]; FBpp0301730:c.[43+1471C>G]
2L mapping	492946	Insertion	3	-	TTG	96	50	35.3056	Gene: FBgn0003963, Misc. feature: contig 2L_1_10 1..50000(1)	FBpp0305228:c.[43+1587_43+1588insTTG]; FBpp0301730:c.[43+1587_43+1588insTTG]
2L mapping	493431	SNV	1	A	T	49	97.9592	32.8958	Gene: FBgn0003963, Misc. feature: contig 2L_1_10 1..50000(1)	FBpp0301730:c.[43+2073A>T]; FBpp0305228:c.[43+2073A>T]
2L mapping	493448	SNV	1	A	T	63	100	33.3492	Gene: FBgn0003963, Misc. feature: contig 2L_1_10 1..50000(1)	FBpp0301730:c.[43+2090A>T]; FBpp0305228:c.[43+2090A>T]
2L mapping	493472	SNV	1	A	G	91	98.9011	33.9889	Gene: FBgn0003963, Misc. feature: contig 2L_1_10 1..50000(1)	FBpp0305228:c.[43+2114A>G]; FBpp0301730:c.[43+2114A>G]
2L mapping	493485	SNV	1	A	G	88	85.2273	35.32	Gene: FBgn0003963, Misc. feature: contig 2L_1_10 1..50000(1)	FBpp0305228:c.[43+2127A>G]; FBpp0301730:c.[43+2127A>G]
2L mapping	493491	Deletion	3	AAG	-	89	67.4157	34.25	Gene: FBgn0003963, Misc. feature: contig 2L_1_10 1..50000(1)	FBpp0305228:c.[43+2133_43+2135delAAG]; FBpp0301730:c.[43+2133_43+2135delAAG]
2L mapping	493504	MNV	2	CA	TT	84	98.8095	34.4578	Gene: FBgn0003963, Misc. feature: contig 2L_1_10 1..50000(1)	FBpp0301730:c.[43+2146_43+2147delCAinsTT]; FBpp0305228:c.[43+2146_43+2147delCAinsTT]
2L mapping	493518	SNV	1	A	T	92	100	34.8804	Gene: FBgn0003963, Misc. feature: contig 2L_1_10 1..50000(1)	FBpp0301730:c.[43+2160A>T]; FBpp0305228:c.[43+2160A>T]
2L mapping	493531	SNV	1	A	C	98	100	35.0714	Gene: FBgn0003963, Misc. feature: contig 2L_1_10 1..50000(1)	FBpp0305228:c.[43+2173A>C]; FBpp0301730:c.[43+2173A>C]
2L mapping	493656	MNV	2	CG	TA	88	98.8636	35.1494	Gene: FBgn0003963, Misc. feature: contig 2L_1_10 1..50000(1)	FBpp0305228:c.[43+2298_43+2299delCGinsTA]; FBpp0301730:c.[43+2298_43+2299delCGinsTA]
2L mapping	493865	SNV	1	A	G	100	100	33.09	Gene: FBgn0003963, Misc. feature: contig 2L_1_10 1..50000(1)	FBpp0301730:c.[43+2507A>G]; FBpp0305228:c.[43+2507A>G]
2L mapping	493867	SNV	1	G	A	100	100	34.82	Gene: FBgn0003963, Misc. feature: contig 2L_1_10 1..50000(1)	FBpp0305228:c.[43+2509G>A]; FBpp0301730:c.[43+2509G>A]
2L mapping	493883	SNV	1	T	A	97	98.9691	34.3646	Gene: FBgn0003963, Misc. feature: contig 2L_1_10 1..50000(1)	FBpp0301730:c.[43+2525T>A]; FBpp0305228:c.[43+2525T>A]
2L mapping	493893	Insertion	1	-	T	90	67.7778	35.1148	Gene: FBgn0003963, Misc. feature: contig 2L_1_10 1..50000(1)	FBpp0301730:c.[43+2534_43+2535insT]; FBpp0305228:c.[43+2534_43+2535insT]
2L mapping	493900	SNV	1	A	T	80	80	36.0156	Gene: FBgn0003963, Misc. feature: contig 2L_1_10 1..50000(1)	FBpp0301730:c.[43+2542A>T]; FBpp0305228:c.[43+2542A>T]
2L mapping	493904	Insertion	1	-	A	80	78.75	32.1587	Gene: FBgn0003963, Misc. feature: contig 2L_1_10 1..50000(1)	FBpp0301730:c.[43+2545_43+2546insA]; FBpp0305228:c.[43+2545_43+2546insA]
2L mapping	493949	MNV	2	GG	AT	73	100	34.0205	Gene: FBgn0003963, Misc. feature: contig 2L_1_10 1..50000(1)	FBpp0301730:c.[43+2591_43+2592delGGinsAT]; FBpp0305228:c.[43+2591_43+2592delGGinsAT]
2L mapping	493954	SNV	1	G	C	77	100	32.039	Gene: FBgn0003963, Misc. feature: contig 2L_1_10 1..50000(1)	FBpp0305228:c.[43+2596G>C]; FBpp0301730:c.[43+2596G>C]
2L mapping	493966	SNV	1	A	G	68	100	33.6029	Gene: FBgn0003963, Misc. feature: contig 2L_1_10 1..50000(1)	FBpp0301730:c.[43+2608A>G]; FBpp0305228:c.[43+2608A>G]
2L mapping	493968	SNV	1	A	C	68	97.0588	34.4091	Gene: FBgn0003963, Misc. feature: contig 2L_1_10 1..50000(1)	FBpp0301730:c.[43+2610A>C]; FBpp0305228:c.[43+2610A>C]
2L mapping	493972	SNV	1	T	A	72	100	34.4028	Gene: FBgn0003963, Misc. feature: contig 2L_1_10 1..50000(1)	FBpp0305228:c.[43+2614T>A]; FBpp0301730:c.[43+2614T>A]
2L mapping	493982	SNV	1	T	A	74	100	35	Gene: FBgn0003963, Misc. feature: contig 2L_1_10 1..50000(1)	FBpp0301730:c.[43+2624T>A]; FBpp0305228:c.[43+2624T>A]
2L mapping	494066	SNV	1	C	A	102	100	35.1078	Gene: FBgn0003963, Misc. feature: contig 2L_1_10 1..50000(1)	FBpp0305228:c.[43+2708C>A]; FBpp0301730:c.[43+2708C>A]
2L mapping	494100	SNV	1	A	G	97	100	35.3918	Gene: FBgn0003963, Misc. feature: contig 2L_1_10 1..50000(1)	FBpp0301730:c.[43+2742A>G]; FBpp0305228:c.[43+2742A>G]
2L mapping	494154	SNV	1	C	A	88	100	34.7045	Gene: FBgn0003963, Misc. feature: contig 2L_1_10 1..50000(1)	FBpp0301730:c.[43+2796C>A]; FBpp0305228:c.[43+2796C>A]
2L mapping	494165	Insertion	4	-	GCCC	80	78.75	34.4484	Gene: FBgn0003963, Misc. feature: contig 2L_1_10 1..50000(1)	FBpp0305228:c.[43+2806_43+2807insGCCC]; FBpp0301730:c.[43+2806_43+2807insGCCC]
2L mapping	494200	SNV	1	G	A	80	100	33.9125	Gene: FBgn0003963, Misc. feature: contig 2L_1_10 1..50000(1)	FBpp0301730:c.[43+2842G>A]; FBpp0305228:c.[43+2842G>A]
2L mapping	494503	SNV	1	G	A	85	98.8235	34.5952	Gene: FBgn0003963, Misc. feature: contig 2L_1_10 1..50000(1)	FBpp0301730:c.[43+3145G>A]; FBpp0305228:c.[43+3145G>A]
2L mapping	494631	SNV	1	C	G	111	99.0991	33.8091	Gene: FBgn0003963, Misc. feature: contig 2L_1_10 1..50000(1)	FBpp0305228:c.[43+3273C>G]; FBpp0301730:c.[43+3273C>G]
2L mapping	494649	SNV	1	G	T	105	100	33.4571	Gene: FBgn0003963, Misc. feature: contig 2L_1_10 1..50000(1)	FBpp0301730:c.[43+3291G>T]; FBpp0305228:c.[43+3291G>T]
2L mapping	494690	Deletion	3	AAA	-	109	76.1468	31.988	Gene: FBgn0003963, Misc. feature: contig 2L_1_10 1..50000(1)	FBpp0301730:c.[43+3332_43+3334delAAA]; FBpp0305228:c.[43+3332_43+3334delAAA]
2L mapping	494718	SNV	1	G	A	118	96.6102	34.4123	Gene: FBgn0003963, Misc. feature: contig 2L_1_10 1..50000(1)	FBpp0301730:c.[43+3360G>A]; FBpp0305228:c.[43+3360G>A]
2L mapping	494721	SNV	1	A	G	121	96.6942	33.9829	Gene: FBgn0003963, Misc. feature: contig 2L_1_10 1..50000(1)	FBpp0301730:c.[43+3363A>G]; FBpp0305228:c.[43+3363A>G]
2L mapping	494728	SNV	1	A	G	120	100	33.625	Gene: FBgn0003963, Misc. feature: contig 2L_1_10 1..50000(1)	FBpp0305228:c.[43+3370A>G]; FBpp0301730:c.[43+3370A>G]
2L mapping	494732	SNV	1	T	C	119	99.1597	33.5339	Gene: FBgn0003963, Misc. feature: contig 2L_1_10 1..50000(1)	FBpp0305228:c.[43+3374T>C]; FBpp0301730:c.[43+3374T>C]
2L mapping	494745	SNV	1	C	G	116	100	34.0345	Gene: FBgn0003963, Misc. feature: contig 2L_1_10 1..50000(1)	FBpp0305228:c.[43+3387C>G]; FBpp0301730:c.[43+3387C>G]
2L mapping	494872	SNV	1	C	A	119	100	35.5378	Gene: FBgn0003963, Misc. feature: contig 2L_1_10 1..50000(1)	FBpp0305228:c.[43+3514C>A]; FBpp0301730:c.[43+3514C>A]
2L mapping	494923	SNV	1	A	T	100	99	36.2323	Gene: FBgn0003963, Misc. feature: contig 2L_1_10 1..50000(1)	FBpp0305228:c.[43+3565A>T]; FBpp0301730:c.[43+3565A>T]
2L mapping	495039	SNV	1	C	T	115	100	35.1826	Gene: FBgn0003963, Misc. feature: contig 2L_1_10 1..50000(1)	FBpp0301730:c.[43+3681C>T]; FBpp0305228:c.[43+3681C>T]
2L mapping	495044	MNV	2	GT	TA	113	100	35.7876	Gene: FBgn0003963, Misc. feature: contig 2L_1_10 1..50000(1)	FBpp0305228:c.[43+3686_43+3687delGTinsTA]; FBpp0301730:c.[43+3686_43+3687delGTinsTA]
2L mapping	495050	SNV	1	G	A	114	100	35.7632	Gene: FBgn0003963, Misc. feature: contig 2L_1_10 1..50000(1)	FBpp0305228:c.[43+3692G>A]; FBpp0301730:c.[43+3692G>A]
2L mapping	495063	Replacement	3	ATT	C	108	83.3333	35.6	Gene: FBgn0003963, Misc. feature: contig 2L_1_10 1..50000(1)	FBpp0301730:c.[43+3705_43+3707delATTinsC]; FBpp0305228:c.[43+3705_43+3707delATTinsC]
2L mapping	497587	SNV	1	C	T	110	99.0909	34.4037	Gene: FBgn0003963, Misc. feature: contig 2L_1_10 1..50000(1)	FBpp0305228:c.[43+6229C>T]; FBpp0301730:c.[43+6229C>T]
2L mapping	498117	Deletion	3	ATG	-	76	100	34.7763	Gene: FBgn0003963, Misc. feature: contig 2L_1_10 1..50000(1)	FBpp0305228:c.[43+6759_43+6761delATG]; FBpp0301730:c.[43+6759_43+6761delATG]
2L mapping	498252	SNV	1	C	T	96	100	34.2292	Gene: FBgn0003963, Misc. feature: contig 2L_1_10 1..50000(1)	FBpp0301730:c.[43+6894C>T]; FBpp0305228:c.[43+6894C>T]
2L mapping	498259	SNV	1	A	G	95	100	35.2632	Gene: FBgn0003963, Misc. feature: contig 2L_1_10 1..50000(1)	FBpp0305228:c.[43+6901A>G]; FBpp0301730:c.[43+6901A>G]
2L mapping	498266	SNV	1	T	A	97	100	34.9072	Gene: FBgn0003963, Misc. feature: contig 2L_1_10 1..50000(1)	FBpp0301730:c.[43+6908T>A]; FBpp0305228:c.[43+6908T>A]
2L mapping	498295	SNV	1	T	C	95	100	34.5789	Gene: FBgn0003963, Misc. feature: contig 2L_1_10 1..50000(1)	FBpp0305228:c.[43+6937T>C]; FBpp0301730:c.[43+6937T>C]
2L mapping	498376	SNV	1	G	T	69	95.6522	35.3182	Gene: FBgn0003963, Misc. feature: contig 2L_1_10 1..50000(1)	FBpp0301730:c.[43+7018G>T]; FBpp0305228:c.[43+7018G>T]
2L mapping	498393	SNV	1	C	T	71	100	35.4648	Gene: FBgn0003963, Misc. feature: contig 2L_1_10 1..50000(1)	FBpp0305228:c.[43+7035C>T]; FBpp0301730:c.[43+7035C>T]
2L mapping	498604	SNV	1	C	T	98	100	33.5408	Gene: FBgn0003963, Misc. feature: contig 2L_1_10 1..50000(1)	FBpp0301730:c.[43+7246C>T]; FBpp0305228:c.[43+7246C>T]
2L mapping	498773	Deletion	5	CTGAA	-	91	80.2198	32.5753	Gene: FBgn0003963, Misc. feature: contig 2L_1_10 1..50000(1)	FBpp0305228:c.[43+7415_43+7419delCTGAA]; FBpp0301730:c.[43+7415_43+7419delCTGAA]
2L mapping	498822	SNV	1	T	G	99	100	35.4848	Gene: FBgn0003963, Misc. feature: contig 2L_1_10 1..50000(1)	FBpp0301730:c.[43+7464T>G]; FBpp0305228:c.[43+7464T>G]
2L mapping	498839	SNV	1	C	T	100	100	36.24	Gene: FBgn0003963, Misc. feature: contig 2L_1_10 1..50000(1)	FBpp0305228:c.[43+7481C>T]; FBpp0301730:c.[43+7481C>T]
2L mapping	498864	SNV	1	G	A	110	100	32.2818	Gene: FBgn0003963, Misc. feature: contig 2L_1_10 1..50000(1)	FBpp0301730:c.[43+7506G>A]; FBpp0305228:c.[43+7506G>A]
2L mapping	499702	SNV	1	T	A	102	100	35.6373	Gene: FBgn0003963, Misc. feature: contig 2L_1_10 1..50000(1)	FBpp0305228:c.[43+8344T>A]; FBpp0301730:c.[43+8344T>A]
2L mapping	499705	SNV	1	C	T	103	100	35.1262	Gene: FBgn0003963, Misc. feature: contig 2L_1_10 1..50000(1)	FBpp0301730:c.[43+8347C>T]; FBpp0305228:c.[43+8347C>T]
2L mapping	499719	SNV	1	C	T	105	100	35.581	Gene: FBgn0003963, Misc. feature: contig 2L_1_10 1..50000(1)	FBpp0305228:c.[43+8361C>T]; FBpp0301730:c.[43+8361C>T]
2L mapping	499753	SNV	1	A	G	117	100	33.9145	Gene: FBgn0003963, Misc. feature: contig 2L_1_10 1..50000(1)	FBpp0305228:c.[43+8395A>G]; FBpp0301730:c.[43+8395A>G]
2L mapping	499771	SNV	1	A	G	116	100	36.0086	Gene: FBgn0003963, Misc. feature: contig 2L_1_10 1..50000(1)	FBpp0301730:c.[43+8413A>G]; FBpp0305228:c.[43+8413A>G]
2L mapping	499919	SNV	1	C	G	98	100	35.6633	Gene: FBgn0003963, Misc. feature: contig 2L_1_10 1..50000(1)	FBpp0305228:c.[43+8561C>G]; FBpp0301730:c.[43+8561C>G]
2L mapping	499921	SNV	1	C	A	98	100	36.3469	Gene: FBgn0003963, Misc. feature: contig 2L_1_10 1..50000(1)	FBpp0301730:c.[43+8563C>A]; FBpp0305228:c.[43+8563C>A]
2L mapping	500529	SNV	1	C	T	95	100	34.5474	Gene: FBgn0003963, Misc. feature: contig 2L_1_11 1..50000(1)	FBpp0305228:c.[43+9171C>T]; FBpp0301730:c.[43+9171C>T]
2L mapping	500744	SNV	1	A	C	86	100	34.8837	Gene: FBgn0003963, Misc. feature: contig 2L_1_11 1..50000(1)	FBpp0305228:c.[43+9386A>C]; FBpp0301730:c.[43+9386A>C]
2L mapping	500779	SNV	1	A	C	88	100	33.2045	Gene: FBgn0003963, Misc. feature: contig 2L_1_11 1..50000(1)	FBpp0301730:c.[43+9421A>C]; FBpp0305228:c.[43+9421A>C]
2L mapping	500788	SNV	1	C	T	94	100	34.0957	Gene: FBgn0003963, Misc. feature: contig 2L_1_11 1..50000(1)	FBpp0305228:c.[43+9430C>T]; FBpp0301730:c.[43+9430C>T]
2L mapping	500819	Insertion	2	-	AA	103	69.9029	35.25	Gene: FBgn0003963, Misc. feature: contig 2L_1_11 1..50000(1)	FBpp0301730:c.[43+9460_43+9461insAA]; FBpp0305228:c.[43+9460_43+9461insAA]
2L mapping	500850	SNV	1	T	G	118	100	34.678	Gene: FBgn0003963, Misc. feature: contig 2L_1_11 1..50000(1)	FBpp0305228:c.[43+9492T>G]; FBpp0301730:c.[43+9492T>G]
2L mapping	500906	SNV	1	A	G	112	97.3214	32.633	Gene: FBgn0003963, Misc. feature: contig 2L_1_11 1..50000(1)	FBpp0301730:c.[43+9548A>G]; FBpp0305228:c.[43+9548A>G]
2L mapping	500944	SNV	1	C	T	103	100	32.8641	Gene: FBgn0003963, Misc. feature: contig 2L_1_11 1..50000(1)	FBpp0305228:c.[43+9586C>T]; FBpp0301730:c.[43+9586C>T]
2L mapping	501040	SNV	1	T	G	96	100	35.1562	Gene: FBgn0003963, Misc. feature: contig 2L_1_11 1..50000(1)	FBpp0305228:c.[43+9682T>G]; FBpp0301730:c.[43+9682T>G]
2L mapping	501427	SNV	1	C	A	126	100	34.0397	Gene: FBgn0003963, Misc. feature: contig 2L_1_11 1..50000(1)	FBpp0301730:c.[43+10069C>A]; FBpp0305228:c.[43+10069C>A]
2L mapping	501834	SNV	1	T	C	54	100	33.7963	Gene: FBgn0003963, Misc. feature: contig 2L_1_11 1..50000(1)	FBpp0301730:c.[43+10476T>C]; FBpp0305228:c.[43+10476T>C]
2L mapping	501836	SNV	1	T	C	54	96.2963	34.2885	Gene: FBgn0003963, Misc. feature: contig 2L_1_11 1..50000(1)	FBpp0301730:c.[43+10478T>C]; FBpp0305228:c.[43+10478T>C]
2L mapping	502022	Deletion	6	TTCCGA	-	99	56.5657	33.9821	Gene: FBgn0003963, Misc. feature: contig 2L_1_11 1..50000(1)	FBpp0305228:c.[43+10664_43+10669delTTCCGA]; FBpp0301730:c.[43+10664_43+10669delTTCCGA]
2L mapping	502166	SNV	1	G	T	107	100	34.2056	Gene: FBgn0003963, Misc. feature: contig 2L_1_11 1..50000(1)	FBpp0305228:c.[43+10808G>T]; FBpp0301730:c.[43+10808G>T]
2L mapping	502304	SNV	1	A	G	120	99.1667	34.7731	Gene: FBgn0003963, Misc. feature: contig 2L_1_11 1..50000(1)	FBpp0305228:c.[43+10946A>G]; FBpp0301730:c.[43+10946A>G]
2L mapping	502520	SNV	1	T	G	108	100	34.6944	Gene: FBgn0003963, Misc. feature: contig 2L_1_11 1..50000(1)	FBpp0301730:c.[43+11162T>G]; FBpp0305228:c.[43+11162T>G]
2L mapping	502614	SNV	1	T	A	94	100	34.883	Gene: FBgn0003963, Misc. feature: contig 2L_1_11 1..50000(1)	FBpp0301730:c.[43+11256T>A]; FBpp0305228:c.[43+11256T>A]
2L mapping	502618	SNV	1	T	C	96	100	33.8542	Gene: FBgn0003963, Misc. feature: contig 2L_1_11 1..50000(1)	FBpp0301730:c.[43+11260T>C]; FBpp0305228:c.[43+11260T>C]
2L mapping	503288	SNV	1	C	T	111	100	34.2072	Gene: FBgn0003963, Misc. feature: contig 2L_1_11 1..50000(1)	FBpp0301730:c.[43+11930C>T]; FBpp0305228:c.[43+11930C>T]
2L mapping	503577	SNV	1	C	G	111	100	33.4955	Gene: FBgn0003963, Misc. feature: contig 2L_1_11 1..50000(1)	FBpp0305228:c.[43+12219C>G]; FBpp0301730:c.[43+12219C>G]
2L mapping	503589	SNV	1	G	T	114	100	35.0526	Gene: FBgn0003963, Misc. feature: contig 2L_1_11 1..50000(1)	FBpp0301730:c.[43+12231G>T]; FBpp0305228:c.[43+12231G>T]
2L mapping	503619	SNV	1	T	A	125	100	35.56	Gene: FBgn0003963, Misc. feature: contig 2L_1_11 1..50000(1)	FBpp0305228:c.[43+12261T>A]; FBpp0301730:c.[43+12261T>A]
2L mapping	503627	SNV	1	A	T	127	100	34.315	Gene: FBgn0003963, Misc. feature: contig 2L_1_11 1..50000(1)	FBpp0301730:c.[43+12269A>T]; FBpp0305228:c.[43+12269A>T]
2L mapping	503972	SNV	1	T	A	113	62.8319	34.6197	Gene: FBgn0003963, Misc. feature: contig 2L_1_11 1..50000(1)	FBpp0305228:c.[43+12614T>A]; FBpp0301730:c.[43+12614T>A]
2L mapping	503974	SNV	1	T	G	113	63.7168	35.5833	Gene: FBgn0003963, Misc. feature: contig 2L_1_11 1..50000(1)	FBpp0305228:c.[43+12616T>G]; FBpp0301730:c.[43+12616T>G]
2L mapping	503977	Insertion	2	-	AT	113	62.8319	34.5106	Gene: FBgn0003963, Misc. feature: contig 2L_1_11 1..50000(1)	FBpp0305228:c.[43+12618_43+12619insAT]; FBpp0301730:c.[43+12618_43+12619insAT]
2L mapping	503978	SNV	1	G	T	113	63.7168	35.125	Gene: FBgn0003963, Misc. feature: contig 2L_1_11 1..50000(1)	FBpp0305228:c.[43+12620G>T]; FBpp0301730:c.[43+12620G>T]
2L mapping	503980	MNV	2	AA	TG	113	63.7168	35.6597	Gene: FBgn0003963, Misc. feature: contig 2L_1_11 1..50000(1)	FBpp0301730:c.[43+12622_43+12623delAAinsTG]; FBpp0305228:c.[43+12622_43+12623delAAinsTG]
2L mapping	503984	SNV	1	T	A	132	68.9394	33.6923	Gene: FBgn0003963, Misc. feature: contig 2L_1_11 1..50000(1)	FBpp0305228:c.[43+12626T>A]; FBpp0301730:c.[43+12626T>A]
2L mapping	504059	SNV	1	G	A	96	100	34.25	Gene: FBgn0003963, Misc. feature: contig 2L_1_11 1..50000(1)	FBpp0301730:c.[43+12701G>A]; FBpp0305228:c.[43+12701G>A]
2L mapping	504103	SNV	1	G	A	96	98.9583	33.9789	Gene: FBgn0003963, Misc. feature: contig 2L_1_11 1..50000(1)	FBpp0305228:c.[43+12745G>A]; FBpp0301730:c.[43+12745G>A]
2L mapping	504142	SNV	1	A	C	95	97.8947	34.7419	Gene: FBgn0003963, Misc. feature: contig 2L_1_11 1..50000(1)	FBpp0301730:c.[43+12784A>C]; FBpp0305228:c.[43+12784A>C]
2L mapping	504151	SNV	1	G	A	99	100	34.8889	Gene: FBgn0003963, Misc. feature: contig 2L_1_11 1..50000(1)	FBpp0301730:c.[43+12793G>A]; FBpp0305228:c.[43+12793G>A]
2L mapping	504690	SNV	1	A	G	113	100	34.708	Gene: FBgn0003963, Misc. feature: contig 2L_1_11 1..50000(1)	FBpp0301730:c.[43+13332A>G]; FBpp0305228:c.[43+13332A>G]
2L mapping	504706	SNV	1	G	A	119	100	35.1176	Gene: FBgn0003963, Misc. feature: contig 2L_1_11 1..50000(1)	FBpp0301730:c.[43+13348G>A]; FBpp0305228:c.[43+13348G>A]
2L mapping	504941	SNV	1	C	T	111	100	36.1171	Gene: FBgn0003963, Misc. feature: contig 2L_1_11 1..50000(1)	FBpp0301730:c.[43+13583C>T]; FBpp0305228:c.[43+13583C>T]
2L mapping	504950	SNV	1	G	A	118	100	35.5085	Gene: FBgn0003963, Misc. feature: contig 2L_1_11 1..50000(1)	FBpp0301730:c.[43+13592G>A]; FBpp0305228:c.[43+13592G>A]
2L mapping	504959	SNV	1	C	G	121	100	33.9091	Gene: FBgn0003963, Misc. feature: contig 2L_1_11 1..50000(1)	FBpp0305228:c.[43+13601C>G]; FBpp0301730:c.[43+13601C>G]
2L mapping	504979	SNV	1	T	G	111	100	35.4685	Gene: FBgn0003963, Misc. feature: contig 2L_1_11 1..50000(1)	FBpp0305228:c.[43+13621T>G]; FBpp0301730:c.[43+13621T>G]
2L mapping	504989	SNV	1	C	T	113	100	34.2655	Gene: FBgn0003963, Misc. feature: contig 2L_1_11 1..50000(1)	FBpp0301730:c.[43+13631C>T]; FBpp0305228:c.[43+13631C>T]
2L mapping	505231	Insertion	1	-	T	88	43.1818	33.1053	Gene: FBgn0003963, Misc. feature: contig 2L_1_11 1..50000(1)	FBpp0305228:c.[43+13872_43+13873insT]; FBpp0301730:c.[43+13872_43+13873insT]
2L mapping	505238	SNV	1	G	T	101	79.2079	35.3375	Gene: FBgn0003963, Misc. feature: contig 2L_1_11 1..50000(1)	FBpp0301730:c.[43+13880G>T]; FBpp0305228:c.[43+13880G>T]
2L mapping	505733	SNV	1	C	T	131	100	35.3817	Gene: FBgn0003963, Misc. feature: contig 2L_1_11 1..50000(1)	FBpp0305228:c.[43+14375C>T]; FBpp0301730:c.[43+14375C>T]
2L mapping	506174	SNV	1	C	A	121	97.5207	35.1949	Gene: FBgn0003963, Misc. feature: contig 2L_1_11 1..50000(1)	FBpp0301730:c.[43+14816C>A]; FBpp0305228:c.[43+14816C>A]
2L mapping	507839	SNV	1	T	G	121	100	32.8678	Gene: FBgn0003963, Misc. feature: contig 2L_1_11 1..50000(1)	FBpp0301730:c.[43+16481T>G]; FBpp0305228:c.[43+16481T>G]
2L mapping	508695	SNV	1	T	C	59	100	34.6949	Gene: FBgn0003963, Misc. feature: contig 2L_1_11 1..50000(1)	FBpp0305228:c.[44-16697T>C]; FBpp0301730:c.[44-16697T>C]
2L mapping	508740	SNV	1	A	C	47	100	34.1702	Gene: FBgn0003963, Misc. feature: contig 2L_1_11 1..50000(1)	FBpp0301730:c.[44-16652A>C]; FBpp0305228:c.[44-16652A>C]
2L mapping	508776	SNV	1	A	T	46	100	34.9348	Gene: FBgn0003963, Misc. feature: contig 2L_1_11 1..50000(1)	FBpp0305228:c.[44-16616A>T]; FBpp0301730:c.[44-16616A>T]
2L mapping	508815	SNV	1	A	G	60	98.3333	33.7119	Gene: FBgn0003963, Misc. feature: contig 2L_1_11 1..50000(1)	FBpp0301730:c.[44-16577A>G]; FBpp0305228:c.[44-16577A>G]
2L mapping	509944	SNV	1	C	T	45	100	34.5778	Gene: FBgn0003963, Misc. feature: contig 2L_1_11 1..50000(1)	FBpp0305228:c.[44-15448C>T]; FBpp0301730:c.[44-15448C>T]
2L mapping	510226	SNV	1	G	T	44	100	35.1136	Gene: FBgn0003963, Misc. feature: contig 2L_1_11 1..50000(1)	FBpp0301730:c.[44-15166G>T]; FBpp0305228:c.[44-15166G>T]
2L mapping	510230	SNV	1	G	A	42	100	36.4762	Gene: FBgn0003963, Misc. feature: contig 2L_1_11 1..50000(1)	FBpp0305228:c.[44-15162G>A]; FBpp0301730:c.[44-15162G>A]
2L mapping	510256	SNV	1	A	C	36	100	36.6111	Gene: FBgn0003963, Misc. feature: contig 2L_1_11 1..50000(1)	FBpp0305228:c.[44-15136A>C]; FBpp0301730:c.[44-15136A>C]
2L mapping	510296	SNV	1	C	G	36	100	35.3889	Gene: FBgn0003963, Misc. feature: contig 2L_1_11 1..50000(1)	FBpp0305228:c.[44-15096C>G]; FBpp0301730:c.[44-15096C>G]
2L mapping	510456	SNV	1	C	A	32	100	34.5625	Gene: FBgn0003963, Misc. feature: contig 2L_1_11 1..50000(1)	FBpp0301730:c.[44-14936C>A]; FBpp0305228:c.[44-14936C>A]
2L mapping	510788	Insertion	2	-	CA	39	69.2308	33.9444	Gene: FBgn0003963, Misc. feature: contig 2L_1_11 1..50000(1)	FBpp0301730:c.[44-14605_44-14604insCA]; FBpp0305228:c.[44-14605_44-14604insCA]
2L mapping	510802	SNV	1	T	G	38	100	35.1316	Gene: FBgn0003963, Misc. feature: contig 2L_1_11 1..50000(1)	FBpp0301730:c.[44-14590T>G]; FBpp0305228:c.[44-14590T>G]
2L mapping	510853	Deletion	1	T	-	34	82.3529	36.5	Gene: FBgn0003963, Misc. feature: contig 2L_1_11 1..50000(1)	FBpp0305228:c.[44-14539delT]; FBpp0301730:c.[44-14539delT]
2L mapping	511349	SNV	1	A	G	39	100	33.1282	Gene: FBgn0003963, Misc. feature: contig 2L_1_11 1..50000(1)	FBpp0301730:c.[44-14043A>G]; FBpp0305228:c.[44-14043A>G]
2L mapping	511354	SNV	1	T	G	39	100	33.7692	Gene: FBgn0003963, Misc. feature: contig 2L_1_11 1..50000(1)	FBpp0301730:c.[44-14038T>G]; FBpp0305228:c.[44-14038T>G]
2L mapping	511419	SNV	1	T	C	33	100	34.9394	Gene: FBgn0003963, Misc. feature: contig 2L_1_11 1..50000(1)	FBpp0301730:c.[44-13973T>C]; FBpp0305228:c.[44-13973T>C]
2L mapping	511531	SNV	1	T	A	38	100	36.0526	Gene: FBgn0003963, Misc. feature: contig 2L_1_11 1..50000(1)	FBpp0305228:c.[44-13861T>A]; FBpp0301730:c.[44-13861T>A]
2L mapping	511929	SNV	1	T	A	23	100	34.2174	Gene: FBgn0003963, Misc. feature: contig 2L_1_11 1..50000(1)	FBpp0301730:c.[44-13463T>A]; FBpp0305228:c.[44-13463T>A]
2L mapping	512112	SNV	1	G	C	38	100	34.1316	Gene: FBgn0003963, Misc. feature: contig 2L_1_11 1..50000(1)	FBpp0305228:c.[44-13280G>C]; FBpp0301730:c.[44-13280G>C]
2L mapping	512143	SNV	1	G	T	45	100	33.3778	Gene: FBgn0003963, Misc. feature: contig 2L_1_11 1..50000(1)	FBpp0301730:c.[44-13249G>T]; FBpp0305228:c.[44-13249G>T]
2L mapping	512183	MNV	2	CG	AA	47	100	36.0426	Gene: FBgn0003963, Misc. feature: contig 2L_1_11 1..50000(1)	FBpp0301730:c.[44-13209_44-13208delCGinsAA]; FBpp0305228:c.[44-13209_44-13208delCGinsAA]
2L mapping	512196	Deletion	5	CGACC	-	24	100	33.4583	Gene: FBgn0003963, Misc. feature: contig 2L_1_11 1..50000(1)	FBpp0301730:c.[44-13196_44-13192delCGACC]; FBpp0305228:c.[44-13196_44-13192delCGACC]
2L mapping	512203	Replacement	2	CT	A	24	100	33.9375	Gene: FBgn0003963, Misc. feature: contig 2L_1_11 1..50000(1)	FBpp0305228:c.[44-13189_44-13188delCTinsA]; FBpp0301730:c.[44-13189_44-13188delCTinsA]
2L mapping	512209	SNV	1	T	G	36	100	32.1111	Gene: FBgn0003963, Misc. feature: contig 2L_1_11 1..50000(1)	FBpp0305228:c.[44-13183T>G]; FBpp0301730:c.[44-13183T>G]
2L mapping	512244	Replacement	2	TC	A	40	92.5	33.1757	Gene: FBgn0003963, Misc. feature: contig 2L_1_11 1..50000(1)	FBpp0305228:c.[44-13148_44-13147delTCinsA]; FBpp0301730:c.[44-13148_44-13147delTCinsA]
2L mapping	512274	SNV	1	C	G	42	100	34.2619	Gene: FBgn0003963, Misc. feature: contig 2L_1_11 1..50000(1)	FBpp0301730:c.[44-13118C>G]; FBpp0305228:c.[44-13118C>G]
2L mapping	512279	MNV	2	GG	TT	39	100	35.1154	Gene: FBgn0003963, Misc. feature: contig 2L_1_11 1..50000(1)	FBpp0301730:c.[44-13113_44-13112delGGinsTT]; FBpp0305228:c.[44-13113_44-13112delGGinsTT]
2L mapping	512283	SNV	1	A	T	40	100	35.625	Gene: FBgn0003963, Misc. feature: contig 2L_1_11 1..50000(1)	FBpp0305228:c.[44-13109A>T]; FBpp0301730:c.[44-13109A>T]
2L mapping	512288	SNV	1	G	A	41	100	34.6829	Gene: FBgn0003963, Misc. feature: contig 2L_1_11 1..50000(1)	FBpp0301730:c.[44-13104G>A]; FBpp0305228:c.[44-13104G>A]
2L mapping	512298	SNV	1	G	A	40	100	35.675	Gene: FBgn0003963, Misc. feature: contig 2L_1_11 1..50000(1)	FBpp0301730:c.[44-13094G>A]; FBpp0305228:c.[44-13094G>A]
2L mapping	512305	SNV	1	T	C	42	100	35.381	Gene: FBgn0003963, Misc. feature: contig 2L_1_11 1..50000(1)	FBpp0301730:c.[44-13087T>C]; FBpp0305228:c.[44-13087T>C]
2L mapping	512391	SNV	1	A	G	47	100	35.5957	Gene: FBgn0003963, Misc. feature: contig 2L_1_11 1..50000(1)	FBpp0305228:c.[44-13001A>G]; FBpp0301730:c.[44-13001A>G]
2L mapping	512404	SNV	1	T	C	48	100	33.9583	Gene: FBgn0003963, Misc. feature: contig 2L_1_11 1..50000(1)	FBpp0301730:c.[44-12988T>C]; FBpp0305228:c.[44-12988T>C]
2L mapping	512429	Deletion	1	T	-	51	86.2745	31.9318	Gene: FBgn0003963, Misc. feature: contig 2L_1_11 1..50000(1)	FBpp0305228:c.[44-12963delT]; FBpp0301730:c.[44-12963delT]
2L mapping	512473	SNV	1	A	C	42	100	34.0476	Gene: FBgn0003963, Misc. feature: contig 2L_1_11 1..50000(1)	FBpp0301730:c.[44-12919A>C]; FBpp0305228:c.[44-12919A>C]
2L mapping	513405	SNV	1	G	A	35	97.1429	35.0588	Gene: FBgn0003963, Misc. feature: contig 2L_1_11 1..50000(1)	FBpp0305228:c.[44-11987G>A]; FBpp0301730:c.[44-11987G>A]
2L mapping	513965	Insertion	1	-	A	27	88.8889	33.75	Gene: FBgn0003963, Misc. feature: contig 2L_1_11 1..50000(1)	FBpp0305228:c.[44-11428_44-11427insA]; FBpp0301730:c.[44-11428_44-11427insA]
2L mapping	513979	SNV	1	T	A	32	100	34.75	Gene: FBgn0003963, Misc. feature: contig 2L_1_11 1..50000(1)	FBpp0305228:c.[44-11413T>A]; FBpp0301730:c.[44-11413T>A]
2L mapping	514292	SNV	1	T	C	33	100	33.9697	Gene: FBgn0003963, Misc. feature: contig 2L_1_11 1..50000(1)	FBpp0305228:c.[44-11100T>C]; FBpp0301730:c.[44-11100T>C]
2L mapping	514422	SNV	1	A	G	35	100	34.3714	Gene: FBgn0003963, Misc. feature: contig 2L_1_11 1..50000(1)	FBpp0301730:c.[44-10970A>G]; FBpp0305228:c.[44-10970A>G]
2L mapping	514715	SNV	1	T	C	28	100	34.2143	Gene: FBgn0003963, Misc. feature: contig 2L_1_11 1..50000(1)	FBpp0305228:c.[44-10677T>C]; FBpp0301730:c.[44-10677T>C]
2L mapping	514802	SNV	1	C	A	24	100	33.9167	Gene: FBgn0003963, Misc. feature: contig 2L_1_11 1..50000(1)	FBpp0301730:c.[44-10590C>A]; FBpp0305228:c.[44-10590C>A]
2L mapping	514810	Deletion	1	A	-	31	96.7742	32.3	Gene: FBgn0003963, Misc. feature: contig 2L_1_11 1..50000(1)	FBpp0305228:c.[44-10582delA]; FBpp0301730:c.[44-10582delA]
2L mapping	514818	SNV	1	A	C	33	100	32.5152	Gene: FBgn0003963, Misc. feature: contig 2L_1_11 1..50000(1)	FBpp0305228:c.[44-10574A>C]; FBpp0301730:c.[44-10574A>C]
2L mapping	514823	SNV	1	G	A	35	100	34.8286	Gene: FBgn0003963, Misc. feature: contig 2L_1_11 1..50000(1)	FBpp0305228:c.[44-10569G>A]; FBpp0301730:c.[44-10569G>A]
2L mapping	515074	SNV	1	A	T	43	95.3488	35.2439	Gene: FBgn0003963, Misc. feature: contig 2L_1_11 1..50000(1)	FBpp0305228:c.[44-10318A>T]; FBpp0301730:c.[44-10318A>T]
2L mapping	515128	SNV	1	A	G	35	100	34.8	Gene: FBgn0003963, Misc. feature: contig 2L_1_11 1..50000(1)	FBpp0305228:c.[44-10264A>G]; FBpp0301730:c.[44-10264A>G]
2L mapping	515142	SNV	1	G	A	36	100	34.3889	Gene: FBgn0003963, Misc. feature: contig 2L_1_11 1..50000(1)	FBpp0305228:c.[44-10250G>A]; FBpp0301730:c.[44-10250G>A]
2L mapping	515471	SNV	1	G	A	30	100	34.9	Gene: FBgn0003963, Misc. feature: contig 2L_1_11 1..50000(1)	FBpp0305228:c.[44-9921G>A]; FBpp0301730:c.[44-9921G>A]
2L mapping	515666	SNV	1	A	G	13	100	35.3077	Gene: FBgn0003963, Misc. feature: contig 2L_1_11 1..50000(1)	FBpp0305228:c.[44-9726A>G]; FBpp0301730:c.[44-9726A>G]
2L mapping	515919	SNV	1	A	G	20	100	35.6	Gene: FBgn0003963, Misc. feature: contig 2L_1_11 1..50000(1)	FBpp0305228:c.[44-9473A>G]; FBpp0301730:c.[44-9473A>G]
2L mapping	516219	SNV	1	T	C	41	100	31.1463	Gene: FBgn0003963, Misc. feature: contig 2L_1_11 1..50000(1)	FBpp0305228:c.[44-9173T>C]; FBpp0301730:c.[44-9173T>C]
2L mapping	516236	SNV	1	C	T	48	100	33.375	Gene: FBgn0003963, Misc. feature: contig 2L_1_11 1..50000(1)	FBpp0305228:c.[44-9156C>T]; FBpp0301730:c.[44-9156C>T]
2L mapping	516240	SNV	1	C	T	48	100	34.4583	Gene: FBgn0003963, Misc. feature: contig 2L_1_11 1..50000(1)	FBpp0305228:c.[44-9152C>T]; FBpp0301730:c.[44-9152C>T]
2L mapping	516246	SNV	1	T	C	47	100	34.7447	Gene: FBgn0003963, Misc. feature: contig 2L_1_11 1..50000(1)	FBpp0301730:c.[44-9146T>C]; FBpp0305228:c.[44-9146T>C]
2L mapping	516272	SNV	1	G	T	38	100	34.3684	Gene: FBgn0003963, Misc. feature: contig 2L_1_11 1..50000(1)	FBpp0301730:c.[44-9120G>T]; FBpp0305228:c.[44-9120G>T]
2L mapping	516283	SNV	1	C	T	32	100	35	Gene: FBgn0003963, Misc. feature: contig 2L_1_11 1..50000(1)	FBpp0305228:c.[44-9109C>T]; FBpp0301730:c.[44-9109C>T]
2L mapping	516489	Deletion	6	TGTTGC	-	46	52.1739	33.6667	Gene: FBgn0003963, Misc. feature: contig 2L_1_11 1..50000(1)	FBpp0305228:c.[44-8903_44-8898delTGTTGC]; FBpp0301730:c.[44-8903_44-8898delTGTTGC]
2L mapping	516564	Deletion	3	GGT	-	27	55.5556	35.5333	Gene: FBgn0003963, Misc. feature: contig 2L_1_11 1..50000(1)	FBpp0305228:c.[44-8828_44-8826delGGT]; FBpp0301730:c.[44-8828_44-8826delGGT]
2L mapping	516696	SNV	1	C	T	29	58.6207	33.2353	Gene: FBgn0003963, Misc. feature: contig 2L_1_11 1..50000(1)	FBpp0305228:c.[44-8696C>T]; FBpp0301730:c.[44-8696C>T]
2L mapping	516698	SNV	1	G	T	29	68.9655	35.9	Gene: FBgn0003963, Misc. feature: contig 2L_1_11 1..50000(1)	FBpp0305228:c.[44-8694G>T]; FBpp0301730:c.[44-8694G>T]
2L mapping	516834	SNV	1	C	G	47	100	34.9149	Gene: FBgn0003963, Misc. feature: contig 2L_1_11 1..50000(1)	FBpp0301730:c.[44-8558C>G]; FBpp0305228:c.[44-8558C>G]
2L mapping	516879	SNV	1	G	C	38	100	34.1316	Gene: FBgn0003963, Misc. feature: contig 2L_1_11 1..50000(1)	FBpp0301730:c.[44-8513G>C]; FBpp0305228:c.[44-8513G>C]
2L mapping	516981	SNV	1	G	C	32	100	36.375	Gene: FBgn0003963, Misc. feature: contig 2L_1_11 1..50000(1)	FBpp0301730:c.[44-8411G>C]; FBpp0305228:c.[44-8411G>C]
2L mapping	517180	SNV	1	C	A	47	36.1702	36.5294	Gene: FBgn0003963, Misc. feature: contig 2L_1_11 1..50000(1)	FBpp0301730:c.[44-8212C>A]; FBpp0305228:c.[44-8212C>A]
2L mapping	517184	SNV	1	C	A	46	39.1304	35.5	Gene: FBgn0003963, Misc. feature: contig 2L_1_11 1..50000(1)	FBpp0301730:c.[44-8208C>A]; FBpp0305228:c.[44-8208C>A]
2L mapping	517188	SNV	1	T	A	43	39.5349	36.0588	Gene: FBgn0003963, Misc. feature: contig 2L_1_11 1..50000(1)	FBpp0301730:c.[44-8204T>A]; FBpp0305228:c.[44-8204T>A]
2L mapping	517191	Insertion	2	-	AG	43	39.5349	35.7353	Gene: FBgn0003963, Misc. feature: contig 2L_1_11 1..50000(1)	FBpp0305228:c.[44-8202_44-8201insAG]; FBpp0301730:c.[44-8202_44-8201insAG]
2L mapping	517193	SNV	1	C	A	50	48	35.2917	Gene: FBgn0003963, Misc. feature: contig 2L_1_11 1..50000(1)	FBpp0301730:c.[44-8199C>A]; FBpp0305228:c.[44-8199C>A]
2L mapping	517197	Insertion	1	-	C	51	49.0196	33.52	Gene: FBgn0003963, Misc. feature: contig 2L_1_11 1..50000(1)	FBpp0301730:c.[44-8196_44-8195insC]; FBpp0305228:c.[44-8196_44-8195insC]
2L mapping	517328	SNV	1	G	A	38	100	35.5526	Gene: FBgn0003963, Misc. feature: contig 2L_1_11 1..50000(1)	FBpp0301730:c.[44-8064G>A]; FBpp0305228:c.[44-8064G>A]
2L mapping	517361	SNV	1	C	A	37	100	34.6216	Gene: FBgn0003963, Misc. feature: contig 2L_1_11 1..50000(1)	FBpp0305228:c.[44-8031C>A]; FBpp0301730:c.[44-8031C>A]
2L mapping	517605	SNV	1	A	T	41	100	35.9268	Gene: FBgn0003963, Misc. feature: contig 2L_1_11 1..50000(1)	FBpp0301730:c.[44-7787A>T]; FBpp0305228:c.[44-7787A>T]
2L mapping	517737	SNV	1	G	A	36	100	34.6667	Gene: FBgn0003963, Misc. feature: contig 2L_1_11 1..50000(1)	FBpp0301730:c.[44-7655G>A]; FBpp0305228:c.[44-7655G>A]
2L mapping	517756	SNV	1	A	T	47	100	35.3404	Gene: FBgn0003963, Misc. feature: contig 2L_1_11 1..50000(1)	FBpp0305228:c.[44-7636A>T]; FBpp0301730:c.[44-7636A>T]
2L mapping	517763	SNV	1	C	A	47	100	33.234	Gene: FBgn0003963, Misc. feature: contig 2L_1_11 1..50000(1)	FBpp0305228:c.[44-7629C>A]; FBpp0301730:c.[44-7629C>A]
2L mapping	517789	SNV	1	T	C	45	100	34.7778	Gene: FBgn0003963, Misc. feature: contig 2L_1_11 1..50000(1)	FBpp0305228:c.[44-7603T>C]; FBpp0301730:c.[44-7603T>C]
2L mapping	517821	SNV	1	A	G	47	100	34.766	Gene: FBgn0003963, Misc. feature: contig 2L_1_11 1..50000(1)	FBpp0301730:c.[44-7571A>G]; FBpp0305228:c.[44-7571A>G]
2L mapping	517873	SNV	1	T	C	47	100	34.7021	Gene: FBgn0003963, Misc. feature: contig 2L_1_11 1..50000(1)	FBpp0305228:c.[44-7519T>C]; FBpp0301730:c.[44-7519T>C]
2L mapping	517902	Insertion	1	-	T	49	95.9184	33.5319	Gene: FBgn0003963, Misc. feature: contig 2L_1_11 1..50000(1)	FBpp0301730:c.[44-7491_44-7490insT]; FBpp0305228:c.[44-7491_44-7490insT]
2L mapping	518087	SNV	1	T	C	34	100	35.7353	Gene: FBgn0003963, Misc. feature: contig 2L_1_11 1..50000(1)	FBpp0301730:c.[44-7305T>C]; FBpp0305228:c.[44-7305T>C]
2L mapping	518419	SNV	1	A	G	41	100	32.9268	Gene: FBgn0003963, Misc. feature: contig 2L_1_11 1..50000(1)	FBpp0305228:c.[44-6973A>G]; FBpp0301730:c.[44-6973A>G]
2L mapping	519045	SNV	1	C	A	40	97.5	33.5128	Gene: FBgn0003963, Misc. feature: contig 2L_1_11 1..50000(1)	FBpp0305228:c.[44-6347C>A]; FBpp0301730:c.[44-6347C>A]
2L mapping	519438	SNV	1	G	T	35	100	32.6	Gene: FBgn0003963, Misc. feature: contig 2L_1_11 1..50000(1)	FBpp0301730:c.[44-5954G>T]; FBpp0305228:c.[44-5954G>T]
2L mapping	521048	SNV	1	A	T	46	100	34.9348	Gene: FBgn0003963, Misc. feature: contig 2L_1_11 1..50000(1)	FBpp0305228:c.[44-4344A>T]; FBpp0301730:c.[44-4344A>T]
2L mapping	521050	SNV	1	A	C	46	100	33.7609	Gene: FBgn0003963, Misc. feature: contig 2L_1_11 1..50000(1)	FBpp0305228:c.[44-4342A>C]; FBpp0301730:c.[44-4342A>C]
2L mapping	521699	SNV	1	G	T	47	100	31.3617	Gene: FBgn0003963, Misc. feature: contig 2L_1_11 1..50000(1)	FBpp0305228:c.[44-3693G>T]; FBpp0301730:c.[44-3693G>T]
2L mapping	521790	SNV	1	C	T	48	97.9167	30.8936	Gene: FBgn0003963, Misc. feature: contig 2L_1_11 1..50000(1)	FBpp0305228:c.[44-3602C>T]; FBpp0301730:c.[44-3602C>T]
2L mapping	522142	SNV	1	C	T	41	100	34.9756	Gene: FBgn0003963, Misc. feature: contig 2L_1_11 1..50000(1)	FBpp0301730:c.[44-3250C>T]; FBpp0305228:c.[44-3250C>T]
2L mapping	522347	SNV	1	T	G	41	97.561	33.7	Gene: FBgn0003963, Misc. feature: contig 2L_1_11 1..50000(1)	FBpp0301730:c.[44-3045T>G]; FBpp0305228:c.[44-3045T>G]
2L mapping	522517	SNV	1	A	C	28	50	36.4286	Gene: FBgn0003963, Misc. feature: contig 2L_1_11 1..50000(1)	FBpp0305228:c.[44-2875A>C]; FBpp0301730:c.[44-2875A>C]
2L mapping	522518	SNV	1	A	C	28	39.2857	34.1818	Gene: FBgn0003963, Misc. feature: contig 2L_1_11 1..50000(1)	FBpp0305228:c.[44-2874A>C]; FBpp0301730:c.[44-2874A>C]
2L mapping	522519	SNV	1	A	T	28	50	30.1429	Gene: FBgn0003963, Misc. feature: contig 2L_1_11 1..50000(1)	FBpp0301730:c.[44-2873A>T]; FBpp0305228:c.[44-2873A>T]
2L mapping	522802	SNV	1	C	T	33	100	33.2121	Gene: FBgn0003963, Misc. feature: contig 2L_1_11 1..50000(1)	FBpp0305228:c.[44-2590C>T]; FBpp0301730:c.[44-2590C>T]
2L mapping	522816	SNV	1	A	T	31	100	29.9032	Gene: FBgn0003963, Misc. feature: contig 2L_1_11 1..50000(1)	FBpp0305228:c.[44-2576A>T]; FBpp0301730:c.[44-2576A>T]
2L mapping	522848	SNV	1	G	A	21	100	35.9524	Gene: FBgn0003963, Misc. feature: contig 2L_1_11 1..50000(1)	FBpp0305228:c.[44-2544G>A]; FBpp0301730:c.[44-2544G>A]
2L mapping	522865	Deletion	1	C	-	19	68.4211	32.6923	Gene: FBgn0003963, Misc. feature: contig 2L_1_11 1..50000(1)	FBpp0301730:c.[44-2527delC]; FBpp0305228:c.[44-2527delC]
2L mapping	522901	SNV	1	T	C	34	100	31.5588	Gene: FBgn0003963, Misc. feature: contig 2L_1_11 1..50000(1)	FBpp0301730:c.[44-2491T>C]; FBpp0305228:c.[44-2491T>C]
2L mapping	523223	SNV	1	A	G	39	100	34.2308	Gene: FBgn0003963, Misc. feature: contig 2L_1_11 1..50000(1)	FBpp0301730:c.[44-2169A>G]; FBpp0305228:c.[44-2169A>G]
2L mapping	523610	SNV	1	G	A	26	100	33.3462	Exon: Exon, Gene: FBgn0003963, Misc. feature: contig 2L_1_11 1..50000(1), mRNA: FBgn0003963	FBpp0301730:c.[44-1782G>A]; FBpp0305228:c.[44-1782G>A]
2L mapping	524304	SNV	1	T	C	22	100	31.5455	Gene: FBgn0003963, Misc. feature: contig 2L_1_11 1..50000(1)	FBpp0077723:c.[22+245T>C]; FBpp0305228:c.[44-1088T>C]; FBpp0301730:c.[44-1088T>C]; FBpp0302929:c.[22+245T>C]
2L mapping	524432	SNV	1	T	G	35	100	34.6857	Gene: FBgn0003963, Misc. feature: contig 2L_1_11 1..50000(1)	FBpp0301730:c.[44-960T>G]; FBpp0302929:c.[22+373T>G]; FBpp0077723:c.[22+373T>G]; FBpp0305228:c.[44-960T>G]
2L mapping	524945	SNV	1	C	T	30	100	35.3	Gene: FBgn0003963, Misc. feature: contig 2L_1_11 1..50000(1)	FBpp0301730:c.[44-447C>T]; FBpp0305228:c.[44-447C>T]; FBpp0077723:c.[23-447C>T]; FBpp0302929:c.[23-447C>T]
2L mapping	524954	SNV	1	G	T	34	100	33.2353	Gene: FBgn0003963, Misc. feature: contig 2L_1_11 1..50000(1)	FBpp0077723:c.[23-438G>T]; FBpp0305228:c.[44-438G>T]; FBpp0301730:c.[44-438G>T]; FBpp0302929:c.[23-438G>T]
2L mapping	525207	MNV	2	TC	AT	41	41.4634	36.2059	Gene: FBgn0003963, Misc. feature: contig 2L_1_11 1..50000(1)	FBpp0301730:c.[44-185_44-184delTCinsAT]; FBpp0077723:c.[23-185_23-184delTCinsAT]; FBpp0302929:c.[23-185_23-184delTCinsAT]; FBpp0305228:c.[44-185_44-184delTCinsAT]
2L mapping	525267	SNV	1	A	G	37	100	36.1351	Gene: FBgn0003963, Misc. feature: contig 2L_1_11 1..50000(1)	FBpp0077723:c.[23-125A>G]; FBpp0302929:c.[23-125A>G]; FBpp0305228:c.[44-125A>G]; FBpp0301730:c.[44-125A>G]
2L mapping	525313	SNV	1	G	A	26	96.1538	34.96	Gene: FBgn0003963, Misc. feature: contig 2L_1_11 1..50000(1)	FBpp0302929:c.[23-79G>A]; FBpp0305228:c.[44-79G>A]; FBpp0077723:c.[23-79G>A]; FBpp0301730:c.[44-79G>A]
2L mapping	525315	Deletion	1	C	-	26	100	34.6154	Gene: FBgn0003963, Misc. feature: contig 2L_1_11 1..50000(1)	FBpp0301730:c.[44-77delC]; FBpp0302929:c.[23-77delC]; FBpp0305228:c.[44-77delC]; FBpp0077723:c.[23-77delC]
2L mapping	525318	SNV	1	A	G	26	100	33.7308	Gene: FBgn0003963, Misc. feature: contig 2L_1_11 1..50000(1)	FBpp0077723:c.[23-74A>G]; FBpp0302929:c.[23-74A>G]; FBpp0301730:c.[44-74A>G]; FBpp0305228:c.[44-74A>G]
2L mapping	525320	Deletion	2	AC	-	26	100	33.1923	Gene: FBgn0003963, Misc. feature: contig 2L_1_11 1..50000(1)	FBpp0302929:c.[23-72_23-71delAC]; FBpp0301730:c.[44-72_44-71delAC]; FBpp0305228:c.[44-72_44-71delAC]; FBpp0077723:c.[23-72_23-71delAC]
2L mapping	525337	SNV	1	A	C	33	100	34.5152	Gene: FBgn0003963, Misc. feature: contig 2L_1_11 1..50000(1)	FBpp0302929:c.[23-55A>C]; FBpp0301730:c.[44-55A>C]; FBpp0077723:c.[23-55A>C]; FBpp0305228:c.[44-55A>C]
2L mapping	525446	SNV	1	T	C	21	100	33.7619	Gene: FBgn0003963, Misc. feature: contig 2L_1_11 1..50000(1)	FBpp0302929:c.[67+10T>C]; FBpp0301730:c.[88+10T>C]; FBpp0305227:c.[19+10T>C]; FBpp0077723:c.[67+10T>C]; FBpp0305228:c.[88+10T>C]
2L mapping	525924	SNV	1	T	A	10	100	31.5	Gene: FBgn0003963, Misc. feature: contig 2L_1_11 1..50000(1)	FBpp0301730:c.[88+488T>A]; FBpp0302929:c.[67+488T>A]; FBpp0305227:c.[19+488T>A]; FBpp0305228:c.[88+488T>A]; FBpp0077723:c.[67+488T>A]
2L mapping	526094	SNV	1	C	T	35	100	35.5714	Gene: FBgn0003963, Misc. feature: contig 2L_1_11 1..50000(1)	FBpp0301730:c.[88+658C>T]; FBpp0077723:c.[67+658C>T]; FBpp0302929:c.[67+658C>T]; FBpp0305227:c.[19+658C>T]; FBpp0305228:c.[88+658C>T]
2L mapping	526669	SNV	1	C	T	22	54.5455	33.75	Gene: FBgn0003963, Misc. feature: contig 2L_1_11 1..50000(1)	FBpp0077723:c.[67+1233C>T]; FBpp0305228:c.[88+1233C>T]; FBpp0301730:c.[88+1233C>T]; FBpp0302929:c.[67+1233C>T]; FBpp0305227:c.[19+1233C>T]
2L mapping	526695	SNV	1	T	G	29	100	33.6552	Gene: FBgn0003963, Misc. feature: contig 2L_1_11 1..50000(1)	FBpp0077723:c.[67+1259T>G]; FBpp0305228:c.[88+1259T>G]; FBpp0305227:c.[19+1259T>G]; FBpp0302929:c.[67+1259T>G]; FBpp0301730:c.[88+1259T>G]
2L mapping	526704	SNV	1	G	C	31	100	34.4839	Gene: FBgn0003963, Misc. feature: contig 2L_1_11 1..50000(1)	FBpp0302929:c.[67+1268G>C]; FBpp0305228:c.[88+1268G>C]; FBpp0077723:c.[67+1268G>C]; FBpp0305227:c.[19+1268G>C]; FBpp0301730:c.[88+1268G>C]
2L mapping	526756	SNV	1	T	A	31	100	35.7419	Gene: FBgn0003963, Misc. feature: contig 2L_1_11 1..50000(1)	FBpp0302929:c.[67+1320T>A]; FBpp0077723:c.[67+1320T>A]; FBpp0305228:c.[88+1320T>A]; FBpp0301730:c.[88+1320T>A]; FBpp0305227:c.[19+1320T>A]
2L mapping	526758	SNV	1	C	T	31	100	33.2903	Gene: FBgn0003963, Misc. feature: contig 2L_1_11 1..50000(1)	FBpp0077723:c.[67+1322C>T]; FBpp0305227:c.[19+1322C>T]; FBpp0301730:c.[88+1322C>T]; FBpp0302929:c.[67+1322C>T]; FBpp0305228:c.[88+1322C>T]
2L mapping	526805	SNV	1	A	G	28	100	35.1429	Gene: FBgn0003963, Misc. feature: contig 2L_1_11 1..50000(1)	FBpp0301730:c.[88+1369A>G]; FBpp0302929:c.[67+1369A>G]; FBpp0077723:c.[67+1369A>G]; FBpp0305228:c.[88+1369A>G]; FBpp0305227:c.[19+1369A>G]
2L mapping	526839	SNV	1	T	A	39	100	36.1026	Gene: FBgn0003963, Misc. feature: contig 2L_1_11 1..50000(1)	FBpp0305228:c.[88+1403T>A]; FBpp0077723:c.[67+1403T>A]; FBpp0302929:c.[67+1403T>A]; FBpp0305227:c.[19+1403T>A]; FBpp0301730:c.[88+1403T>A]
2L mapping	527033	SNV	1	T	A	34	100	34.2353	Gene: FBgn0003963, Misc. feature: contig 2L_1_11 1..50000(1)	FBpp0301730:c.[88+1597T>A]; FBpp0077723:c.[67+1597T>A]; FBpp0305227:c.[19+1597T>A]; FBpp0305228:c.[88+1597T>A]; FBpp0302929:c.[67+1597T>A]
2L mapping	527739	SNV	1	T	C	29	100	33.8276	Gene: FBgn0003963, Misc. feature: contig 2L_1_11 1..50000(1)	FBpp0077723:c.[67+2303T>C]; FBpp0305228:c.[88+2303T>C]; FBpp0302929:c.[67+2303T>C]; FBpp0305227:c.[19+2303T>C]; FBpp0301730:c.[88+2303T>C]
2L mapping	527943	SNV	1	T	A	24	100	32.1667	Gene: FBgn0003963, Misc. feature: contig 2L_1_11 1..50000(1)	FBpp0305228:c.[88+2507T>A]; FBpp0305227:c.[19+2507T>A]; FBpp0302929:c.[67+2507T>A]; FBpp0301730:c.[88+2507T>A]; FBpp0077723:c.[67+2507T>A]
2L mapping	527985	SNV	1	G	C	16	100	32.625	Gene: FBgn0003963, Misc. feature: contig 2L_1_11 1..50000(1)	FBpp0301730:c.[88+2549G>C]; FBpp0077723:c.[67+2549G>C]; FBpp0305228:c.[88+2549G>C]; FBpp0302929:c.[67+2549G>C]; FBpp0305227:c.[19+2549G>C]
2L mapping	527988	Insertion	3	-	TTT	16	43.75	34.4762	Gene: FBgn0003963, Misc. feature: contig 2L_1_11 1..50000(1)	FBpp0077723:c.[67+2551_67+2552insTTT]; FBpp0305228:c.[88+2551_88+2552insTTT]; FBpp0301730:c.[88+2551_88+2552insTTT]; FBpp0302929:c.[67+2551_67+2552insTTT]; FBpp0305227:c.[19+2551_19+2552insTTT]
2L mapping	528314	Insertion	1	-	T	36	86.1111	34.6452	Gene: FBgn0003963, Misc. feature: contig 2L_1_11 1..50000(1)	FBpp0077723:c.[67+2877_67+2878insT]; FBpp0305227:c.[19+2877_19+2878insT]; FBpp0305228:c.[88+2877_88+2878insT]; FBpp0302929:c.[67+2877_67+2878insT]; FBpp0301730:c.[88+2877_88+2878insT]
2L mapping	528881	Deletion	1	A	-	15	100	34.9333	Gene: FBgn0003963, Misc. feature: contig 2L_1_11 1..50000(1)	FBpp0302929:c.[67+3445delA]; FBpp0077723:c.[67+3445delA]; FBpp0301730:c.[88+3445delA]; FBpp0305227:c.[19+3445delA]; FBpp0305228:c.[88+3445delA]
2L mapping	529821	SNV	1	A	G	28	100	34.1429	Gene: FBgn0003963, Misc. feature: contig 2L_1_11 1..50000(1)	FBpp0305227:c.[19+4385A>G]; FBpp0305228:c.[88+4385A>G]; FBpp0302929:c.[67+4385A>G]; FBpp0077723:c.[67+4385A>G]; FBpp0301730:c.[88+4385A>G]
2L mapping	529844	SNV	1	T	C	26	100	34.6923	Gene: FBgn0003963, Misc. feature: contig 2L_1_11 1..50000(1)	FBpp0302929:c.[67+4408T>C]; FBpp0301730:c.[88+4408T>C]; FBpp0077723:c.[67+4408T>C]; FBpp0305228:c.[88+4408T>C]; FBpp0305227:c.[19+4408T>C]
2L mapping	530374	SNV	1	C	A	23	100	34.4348	Gene: FBgn0003963, Misc. feature: contig 2L_1_11 1..50000(1)	FBpp0305227:c.[19+4938C>A]; FBpp0302929:c.[67+4938C>A]; FBpp0077723:c.[67+4938C>A]; FBpp0301730:c.[88+4938C>A]; FBpp0305228:c.[88+4938C>A]
2L mapping	530392	SNV	1	G	C	28	100	34.3929	Gene: FBgn0003963, Misc. feature: contig 2L_1_11 1..50000(1)	FBpp0302929:c.[67+4956G>C]; FBpp0077723:c.[67+4956G>C]; FBpp0305228:c.[88+4956G>C]; FBpp0305227:c.[19+4956G>C]; FBpp0301730:c.[88+4956G>C]
2L mapping	531279	MNV	2	TC	CG	31	100	34.1452	Gene: FBgn0003963, Misc. feature: contig 2L_1_11 1..50000(1)	FBpp0301730:c.[89-4744_89-4743delTCinsCG]; FBpp0077723:c.[68-4744_68-4743delTCinsCG]; FBpp0305227:c.[20-4744_20-4743delTCinsCG]; FBpp0305228:c.[89-4744_89-4743delTCinsCG]; FBpp0302929:c.[68-4744_68-4743delTCinsCG]
2L mapping	531631	SNV	1	T	C	20	35	37	Gene: FBgn0003963, Misc. feature: contig 2L_1_11 1..50000(1)	FBpp0301730:c.[89-4392T>C]; FBpp0305227:c.[20-4392T>C]; FBpp0302929:c.[68-4392T>C]; FBpp0305228:c.[89-4392T>C]; FBpp0077723:c.[68-4392T>C]
2L mapping	531640	MNV	2	CA	GT	21	42.8571	36	Gene: FBgn0003963, Misc. feature: contig 2L_1_11 1..50000(1)	FBpp0305228:c.[89-4383_89-4382delCAinsGT]; FBpp0077723:c.[68-4383_68-4382delCAinsGT]; FBpp0301730:c.[89-4383_89-4382delCAinsGT]; FBpp0305227:c.[20-4383_20-4382delCAinsGT]; FBpp0302929:c.[68-4383_68-4382delCAinsGT]
2L mapping	531708	Deletion	1	C	-	200	86.5	33.1734	Gene: FBgn0003963, Misc. feature: contig 2L_1_11 1..50000(1)	FBpp0077723:c.[68-4315delC]; FBpp0301730:c.[89-4315delC]; FBpp0305228:c.[89-4315delC]; FBpp0302929:c.[68-4315delC]; FBpp0305227:c.[20-4315delC]
2L mapping	531712	Insertion	1	-	T	228	87.2807	34.8995	Gene: FBgn0003963, Misc. feature: contig 2L_1_11 1..50000(1)	FBpp0302929:c.[68-4312_68-4311insT]; FBpp0305227:c.[20-4312_20-4311insT]; FBpp0301730:c.[89-4312_89-4311insT]; FBpp0305228:c.[89-4312_89-4311insT]; FBpp0077723:c.[68-4312_68-4311insT]
2L mapping	531718	SNV	1	G	T	332	92.4699	35.9446	Gene: FBgn0003963, Misc. feature: contig 2L_1_11 1..50000(1)	FBpp0305227:c.[20-4305G>T]; FBpp0077723:c.[68-4305G>T]; FBpp0301730:c.[89-4305G>T]; FBpp0305228:c.[89-4305G>T]; FBpp0302929:c.[68-4305G>T]
2L mapping	531724	SNV	1	A	T	332	92.7711	35.8799	Gene: FBgn0003963, Misc. feature: contig 2L_1_11 1..50000(1)	FBpp0305228:c.[89-4299A>T]; FBpp0305227:c.[20-4299A>T]; FBpp0302929:c.[68-4299A>T]; FBpp0301730:c.[89-4299A>T]; FBpp0077723:c.[68-4299A>T]
2L mapping	531752	Insertion	1	-	C	315	78.7302	35.5524	Gene: FBgn0003963, Misc. feature: contig 2L_1_11 1..50000(1)	FBpp0302929:c.[68-4272_68-4271insC]; FBpp0305228:c.[89-4272_89-4271insC]; FBpp0077723:c.[68-4272_68-4271insC]; FBpp0301730:c.[89-4272_89-4271insC]; FBpp0305227:c.[20-4272_20-4271insC]
2L mapping	531755	Deletion	1	C	-	271	91.5129	34.2742	Gene: FBgn0003963, Misc. feature: contig 2L_1_11 1..50000(1)	FBpp0077723:c.[68-4268delC]; FBpp0305227:c.[20-4268delC]; FBpp0302929:c.[68-4268delC]; FBpp0301730:c.[89-4268delC]; FBpp0305228:c.[89-4268delC]
2L mapping	531793	SNV	1	T	A	17	100	34.2353	Gene: FBgn0003963, Misc. feature: contig 2L_1_11 1..50000(1)	FBpp0302929:c.[68-4230T>A]; FBpp0301730:c.[89-4230T>A]; FBpp0305228:c.[89-4230T>A]; FBpp0305227:c.[20-4230T>A]; FBpp0077723:c.[68-4230T>A]
2L mapping	531981	Deletion	1	C	-	37	89.1892	32.0606	Gene: FBgn0003963, Misc. feature: contig 2L_1_11 1..50000(1)	FBpp0077723:c.[68-4042delC]; FBpp0305228:c.[89-4042delC]; FBpp0302929:c.[68-4042delC]; FBpp0305227:c.[20-4042delC]; FBpp0301730:c.[89-4042delC]
2L mapping	531984	SNV	1	C	T	33	100	34.0303	Gene: FBgn0003963, Misc. feature: contig 2L_1_11 1..50000(1)	FBpp0305227:c.[20-4039C>T]; FBpp0305228:c.[89-4039C>T]; FBpp0302929:c.[68-4039C>T]; FBpp0301730:c.[89-4039C>T]; FBpp0077723:c.[68-4039C>T]
2L mapping	531988	SNV	1	T	C	33	100	35.8182	Gene: FBgn0003963, Misc. feature: contig 2L_1_11 1..50000(1)	FBpp0077723:c.[68-4035T>C]; FBpp0302929:c.[68-4035T>C]; FBpp0305228:c.[89-4035T>C]; FBpp0301730:c.[89-4035T>C]; FBpp0305227:c.[20-4035T>C]
2L mapping	532094	SNV	1	C	T	45	100	35.6	Gene: FBgn0003963, Misc. feature: contig 2L_1_11 1..50000(1)	FBpp0305227:c.[20-3929C>T]; FBpp0305228:c.[89-3929C>T]; FBpp0302929:c.[68-3929C>T]; FBpp0077723:c.[68-3929C>T]; FBpp0301730:c.[89-3929C>T]
2L mapping	532224	SNV	1	G	A	40	97.5	32.2821	Gene: FBgn0003963, Misc. feature: contig 2L_1_11 1..50000(1)	FBpp0305228:c.[89-3799G>A]; FBpp0305227:c.[20-3799G>A]; FBpp0302929:c.[68-3799G>A]; FBpp0301730:c.[89-3799G>A]; FBpp0077723:c.[68-3799G>A]
2L mapping	532231	SNV	1	A	C	35	97.1429	33.6176	Gene: FBgn0003963, Misc. feature: contig 2L_1_11 1..50000(1)	FBpp0305228:c.[89-3792A>C]; FBpp0077723:c.[68-3792A>C]; FBpp0302929:c.[68-3792A>C]; FBpp0305227:c.[20-3792A>C]; FBpp0301730:c.[89-3792A>C]
2L mapping	532254	SNV	1	A	G	31	100	33	Gene: FBgn0003963, Misc. feature: contig 2L_1_11 1..50000(1)	FBpp0301730:c.[89-3769A>G]; FBpp0302929:c.[68-3769A>G]; FBpp0305227:c.[20-3769A>G]; FBpp0305228:c.[89-3769A>G]; FBpp0077723:c.[68-3769A>G]
2L mapping	532265	SNV	1	G	T	31	100	33.3548	Gene: FBgn0003963, Misc. feature: contig 2L_1_11 1..50000(1)	FBpp0305228:c.[89-3758G>T]; FBpp0302929:c.[68-3758G>T]; FBpp0305227:c.[20-3758G>T]; FBpp0077723:c.[68-3758G>T]; FBpp0301730:c.[89-3758G>T]
2L mapping	532283	SNV	1	A	G	34	100	32.7941	Gene: FBgn0003963, Misc. feature: contig 2L_1_11 1..50000(1)	FBpp0305228:c.[89-3740A>G]; FBpp0305227:c.[20-3740A>G]; FBpp0077723:c.[68-3740A>G]; FBpp0301730:c.[89-3740A>G]; FBpp0302929:c.[68-3740A>G]
2L mapping	532537	SNV	1	T	A	37	100	35.1622	Gene: FBgn0003963, Misc. feature: contig 2L_1_11 1..50000(1)	FBpp0302929:c.[68-3486T>A]; FBpp0301730:c.[89-3486T>A]; FBpp0305228:c.[89-3486T>A]; FBpp0305227:c.[20-3486T>A]; FBpp0077723:c.[68-3486T>A]
2L mapping	533185	SNV	1	G	A	24	100	30.125	Gene: FBgn0003963, Misc. feature: contig 2L_1_11 1..50000(1)	FBpp0077723:c.[68-2838G>A]; FBpp0302929:c.[68-2838G>A]; FBpp0305227:c.[20-2838G>A]; FBpp0305228:c.[89-2838G>A]; FBpp0301730:c.[89-2838G>A]
2L mapping	533191	Deletion	1	T	-	25	92	30.6087	Gene: FBgn0003963, Misc. feature: contig 2L_1_11 1..50000(1)	FBpp0305227:c.[20-2832delT]; FBpp0305228:c.[89-2832delT]; FBpp0301730:c.[89-2832delT]; FBpp0302929:c.[68-2832delT]; FBpp0077723:c.[68-2832delT]
2L mapping	533323	SNV	1	T	G	17	100	30.7059	Gene: FBgn0003963, Misc. feature: contig 2L_1_11 1..50000(1)	FBpp0301730:c.[89-2700T>G]; FBpp0305228:c.[89-2700T>G]; FBpp0302929:c.[68-2700T>G]; FBpp0077723:c.[68-2700T>G]; FBpp0305227:c.[20-2700T>G]
2L mapping	533325	SNV	1	T	C	17	100	29.8235	Gene: FBgn0003963, Misc. feature: contig 2L_1_11 1..50000(1)	FBpp0077723:c.[68-2698T>C]; FBpp0302929:c.[68-2698T>C]; FBpp0305228:c.[89-2698T>C]; FBpp0305227:c.[20-2698T>C]; FBpp0301730:c.[89-2698T>C]
2L mapping	533376	SNV	1	A	G	27	100	33.2593	Gene: FBgn0003963, Misc. feature: contig 2L_1_11 1..50000(1)	FBpp0302929:c.[68-2647A>G]; FBpp0305227:c.[20-2647A>G]; FBpp0077723:c.[68-2647A>G]; FBpp0301730:c.[89-2647A>G]; FBpp0305228:c.[89-2647A>G]
2L mapping	533383	SNV	1	A	C	29	100	32.7241	Gene: FBgn0003963, Misc. feature: contig 2L_1_11 1..50000(1)	FBpp0305228:c.[89-2640A>C]; FBpp0077723:c.[68-2640A>C]; FBpp0305227:c.[20-2640A>C]; FBpp0302929:c.[68-2640A>C]; FBpp0301730:c.[89-2640A>C]
2L mapping	533391	MNV	3	CCG	TTA	23	100	35.2319	Gene: FBgn0003963, Misc. feature: contig 2L_1_11 1..50000(1)	FBpp0301730:c.[89-2632_89-2630delCCGinsTTA]; FBpp0077723:c.[68-2632_68-2630delCCGinsTTA]; FBpp0305227:c.[20-2632_20-2630delCCGinsTTA]; FBpp0302929:c.[68-2632_68-2630delCCGinsTTA]; FBpp0305228:c.[89-2632_89-2630delCCGinsTTA]
2L mapping	533403	SNV	1	C	T	27	100	35.037	Gene: FBgn0003963, Misc. feature: contig 2L_1_11 1..50000(1)	FBpp0302929:c.[68-2620C>T]; FBpp0301730:c.[89-2620C>T]; FBpp0077723:c.[68-2620C>T]; FBpp0305227:c.[20-2620C>T]; FBpp0305228:c.[89-2620C>T]
2L mapping	533491	Deletion	3	GTT	-	28	85.7143	33.5833	Gene: FBgn0003963, Misc. feature: contig 2L_1_11 1..50000(1)	FBpp0301730:c.[89-2532_89-2530delGTT]; FBpp0305228:c.[89-2532_89-2530delGTT]; FBpp0305227:c.[20-2532_20-2530delGTT]; FBpp0077723:c.[68-2532_68-2530delGTT]; FBpp0302929:c.[68-2532_68-2530delGTT]
2L mapping	533507	SNV	1	G	A	29	100	35.2414	Gene: FBgn0003963, Misc. feature: contig 2L_1_11 1..50000(1)	FBpp0077723:c.[68-2516G>A]; FBpp0302929:c.[68-2516G>A]; FBpp0301730:c.[89-2516G>A]; FBpp0305227:c.[20-2516G>A]; FBpp0305228:c.[89-2516G>A]
2L mapping	533515	SNV	1	C	T	32	100	34.7812	Gene: FBgn0003963, Misc. feature: contig 2L_1_11 1..50000(1)	FBpp0302929:c.[68-2508C>T]; FBpp0305228:c.[89-2508C>T]; FBpp0305227:c.[20-2508C>T]; FBpp0301730:c.[89-2508C>T]; FBpp0077723:c.[68-2508C>T]
2L mapping	534220	SNV	1	T	G	37	100	33.8378	Gene: FBgn0003963, Misc. feature: contig 2L_1_11 1..50000(1)	FBpp0305227:c.[20-1803T>G]; FBpp0301730:c.[89-1803T>G]; FBpp0077723:c.[68-1803T>G]; FBpp0305228:c.[89-1803T>G]; FBpp0302929:c.[68-1803T>G]
2L mapping	534275	Deletion	1	C	-	41	100	32.8537	Gene: FBgn0003963, Misc. feature: contig 2L_1_11 1..50000(1)	FBpp0301730:c.[89-1748delC]; FBpp0302929:c.[68-1748delC]; FBpp0305227:c.[20-1748delC]; FBpp0305228:c.[89-1748delC]; FBpp0077723:c.[68-1748delC]
2L mapping	534285	SNV	1	G	T	39	97.4359	34.1316	Gene: FBgn0003963, Misc. feature: contig 2L_1_11 1..50000(1)	FBpp0077723:c.[68-1738G>T]; FBpp0305227:c.[20-1738G>T]; FBpp0305228:c.[89-1738G>T]; FBpp0302929:c.[68-1738G>T]; FBpp0301730:c.[89-1738G>T]
2L mapping	534317	SNV	1	T	C	38	100	35.2368	Gene: FBgn0003963, Misc. feature: contig 2L_1_11 1..50000(1)	FBpp0302929:c.[68-1706T>C]; FBpp0077723:c.[68-1706T>C]; FBpp0301730:c.[89-1706T>C]; FBpp0305228:c.[89-1706T>C]; FBpp0305227:c.[20-1706T>C]
2L mapping	534432	SNV	1	T	A	26	100	34.3846	Gene: FBgn0003963, Misc. feature: contig 2L_1_11 1..50000(1)	FBpp0305227:c.[20-1591T>A]; FBpp0302929:c.[68-1591T>A]; FBpp0305228:c.[89-1591T>A]; FBpp0301730:c.[89-1591T>A]; FBpp0077723:c.[68-1591T>A]
2L mapping	534458	SNV	1	A	G	30	100	33.6	Gene: FBgn0003963, Misc. feature: contig 2L_1_11 1..50000(1)	FBpp0077723:c.[68-1565A>G]; FBpp0302929:c.[68-1565A>G]; FBpp0301730:c.[89-1565A>G]; FBpp0305228:c.[89-1565A>G]; FBpp0305227:c.[20-1565A>G]
2L mapping	534521	SNV	1	G	A	36	100	34.3056	Gene: FBgn0003963, Misc. feature: contig 2L_1_11 1..50000(1)	FBpp0302929:c.[68-1502G>A]; FBpp0305227:c.[20-1502G>A]; FBpp0077723:c.[68-1502G>A]; FBpp0305228:c.[89-1502G>A]; FBpp0301730:c.[89-1502G>A]
2L mapping	535109	SNV	1	T	C	28	96.4286	35.4444	Gene: FBgn0003963, Misc. feature: contig 2L_1_11 1..50000(1)	FBpp0077723:c.[68-914T>C]; FBpp0302929:c.[68-914T>C]; FBpp0305227:c.[20-914T>C]; FBpp0301730:c.[89-914T>C]; FBpp0305228:c.[89-914T>C]
2L mapping	535917	SNV	1	T	A	31	100	35.4194	Gene: FBgn0003963, Misc. feature: contig 2L_1_11 1..50000(1)	FBpp0077723:c.[68-106T>A]; FBpp0305228:c.[89-106T>A]; FBpp0302929:c.[68-106T>A]; FBpp0305227:c.[20-106T>A]; FBpp0301730:c.[89-106T>A]
2L mapping	537713	SNV	1	C	A	21	100	35.5238	CDS: FBgn0003963, CDS: FBgn0003963, CDS: FBgn0003963, CDS: FBgn0003963, CDS: FBgn0003963, Exon: Exon, Gene: FBgn0003963, Misc. feature: contig 2L_1_11 1..50000(1), mRNA: FBgn0003963, mRNA: FBgn0003963, mRNA: FBgn0003963, mRNA: FBgn0003963, mRNA: FBgn0003963	FBpp0077723:c.[1571C>A]; FBpp0301730:c.[1592C>A]; FBpp0305227:c.[1523C>A]; FBpp0305228:c.[1592C>A]; FBpp0302929:c.[1571C>A]	FBpp0077723:p.[Pro524His]; FBpp0301730:p.[Pro531His]; FBpp0305227:p.[Pro508His]; FBpp0305228:p.[Pro531His]; FBpp0302929:p.[Pro524His]
2L mapping	537736	SNV	1	G	T	24	95.8333	34.6087	CDS: FBgn0003963, CDS: FBgn0003963, CDS: FBgn0003963, CDS: FBgn0003963, CDS: FBgn0003963, Exon: Exon, Gene: FBgn0003963, Misc. feature: contig 2L_1_11 1..50000(1), mRNA: FBgn0003963, mRNA: FBgn0003963, mRNA: FBgn0003963, mRNA: FBgn0003963, mRNA: FBgn0003963	FBpp0305227:c.[1546G>T]; FBpp0077723:c.[1594G>T]; FBpp0302929:c.[1594G>T]; FBpp0305228:c.[1615G>T]; FBpp0301730:c.[1615G>T]	FBpp0305227:p.[Ala516Ser]; FBpp0077723:p.[Ala532Ser]; FBpp0302929:p.[Ala532Ser]; FBpp0305228:p.[Ala539Ser]; FBpp0301730:p.[Ala539Ser]
2L mapping	539296	SNV	1	C	T	23	100	33.913	Gene: FBgn0003963, Misc. feature: contig 2L_1_11 1..50000(1)	FBpp0302929:c.[2995-14C>T]; FBpp0077723:c.[2995-14C>T]; FBpp0301730:c.[3016-14C>T]; FBpp0305227:c.[2947-14C>T]; FBpp0305228:c.[3016-14C>T]
2L mapping	539304	SNV	1	T	C	25	100	32.96	Gene: FBgn0003963, Misc. feature: contig 2L_1_11 1..50000(1)	FBpp0302929:c.[2995-6T>C]; FBpp0077723:c.[2995-6T>C]; FBpp0301730:c.[3016-6T>C]; FBpp0305227:c.[2947-6T>C]; FBpp0305228:c.[3016-6T>C]
2L mapping	539315	SNV	1	C	A	28	96.4286	31.6667	CDS: FBgn0003963, CDS: FBgn0003963, CDS: FBgn0003963, CDS: FBgn0003963, CDS: FBgn0003963, Exon: Exon, Gene: FBgn0003963, Misc. feature: contig 2L_1_11 1..50000(1), mRNA: FBgn0003963, mRNA: FBgn0003963, mRNA: FBgn0003963, mRNA: FBgn0003963, mRNA: FBgn0003963	FBpp0305227:c.[2952C>A]; FBpp0077723:c.[3000C>A]; FBpp0305228:c.[3021C>A]; FBpp0302929:c.[3000C>A]; FBpp0301730:c.[3021C>A]
2L mapping	539351	SNV	1	C	T	25	100	33.2	CDS: FBgn0003963, CDS: FBgn0003963, CDS: FBgn0003963, CDS: FBgn0003963, CDS: FBgn0003963, Exon: Exon, Gene: FBgn0003963, Misc. feature: contig 2L_1_11 1..50000(1), mRNA: FBgn0003963, mRNA: FBgn0003963, mRNA: FBgn0003963, mRNA: FBgn0003963, mRNA: FBgn0003963	FBpp0305227:c.[2988C>T]; FBpp0077723:c.[3036C>T]; FBpp0305228:c.[3057C>T]; FBpp0302929:c.[3036C>T]; FBpp0301730:c.[3057C>T]
2L mapping	539435	SNV	1	C	T	34	100	37	CDS: FBgn0003963, CDS: FBgn0003963, CDS: FBgn0003963, CDS: FBgn0003963, CDS: FBgn0003963, Exon: Exon, Gene: FBgn0003963, Misc. feature: contig 2L_1_11 1..50000(1), mRNA: FBgn0003963, mRNA: FBgn0003963, mRNA: FBgn0003963, mRNA: FBgn0003963, mRNA: FBgn0003963	FBpp0305227:c.[3072C>T]; FBpp0302929:c.[3120C>T]; FBpp0305228:c.[3141C>T]; FBpp0077723:c.[3120C>T]; FBpp0301730:c.[3141C>T]
2L mapping	539448	SNV	1	C	G	36	100	35.3333	CDS: FBgn0003963, CDS: FBgn0003963, CDS: FBgn0003963, CDS: FBgn0003963, CDS: FBgn0003963, Exon: Exon, Gene: FBgn0003963, Misc. feature: contig 2L_1_11 1..50000(1), mRNA: FBgn0003963, mRNA: FBgn0003963, mRNA: FBgn0003963, mRNA: FBgn0003963, mRNA: FBgn0003963	FBpp0305227:c.[3085C>G]; FBpp0302929:c.[3133C>G]; FBpp0077723:c.[3133C>G]; FBpp0301730:c.[3154C>G]; FBpp0305228:c.[3154C>G]	FBpp0305227:p.[Pro1029Ala]; FBpp0302929:p.[Pro1045Ala]; FBpp0077723:p.[Pro1045Ala]; FBpp0301730:p.[Pro1052Ala]; FBpp0305228:p.[Pro1052Ala]
2L mapping	539458	SNV	1	G	A	37	100	36	Gene: FBgn0003963, Misc. feature: contig 2L_1_11 1..50000(1)	FBpp0305228:c.[3158+6G>A]; FBpp0077723:c.[3137+6G>A]; FBpp0301730:c.[3158+6G>A]; FBpp0302929:c.[3137+6G>A]; FBpp0305227:c.[3089+6G>A]
2L mapping	539466	SNV	1	G	A	38	100	36.1842	Gene: FBgn0003963, Misc. feature: contig 2L_1_11 1..50000(1)	FBpp0305228:c.[3158+14G>A]; FBpp0301730:c.[3158+14G>A]; FBpp0305227:c.[3089+14G>A]; FBpp0077723:c.[3137+14G>A]; FBpp0302929:c.[3137+14G>A]
2L mapping	539494	Replacement	3	CTT	GG	28	100	34.8929	Gene: FBgn0003963, Misc. feature: contig 2L_1_11 1..50000(1)	FBpp0302929:c.[3138-24_3138-22delCTTinsGG]; FBpp0077723:c.[3138-24_3138-22delCTTinsGG]; FBpp0301730:c.[3159-24_3159-22delCTTinsGG]; FBpp0305228:c.[3159-24_3159-22delCTTinsGG]; FBpp0305227:c.[3090-24_3090-22delCTTinsGG]
2L mapping	539499	SNV	1	C	G	29	100	36.8621	Gene: FBgn0003963, Misc. feature: contig 2L_1_11 1..50000(1)	FBpp0301730:c.[3159-19C>G]; FBpp0305228:c.[3159-19C>G]; FBpp0302929:c.[3138-19C>G]; FBpp0305227:c.[3090-19C>G]; FBpp0077723:c.[3138-19C>G]
2L mapping	539507	SNV	1	C	T	32	100	35.4375	Gene: FBgn0003963, Misc. feature: contig 2L_1_11 1..50000(1)	FBpp0302929:c.[3138-11C>T]; FBpp0305228:c.[3159-11C>T]; FBpp0077723:c.[3138-11C>T]; FBpp0301730:c.[3159-11C>T]; FBpp0305227:c.[3090-11C>T]
2L mapping	539884	SNV	1	G	A	18	100	36.3333	CDS: FBgn0003963, CDS: FBgn0003963, CDS: FBgn0003963, CDS: FBgn0003963, CDS: FBgn0003963, Exon: Exon, Exon: Exon, Gene: FBgn0003963, Misc. feature: contig 2L_1_11 1..50000(1), mRNA: FBgn0003963, mRNA: FBgn0003963, mRNA: FBgn0003963, mRNA: FBgn0003963, mRNA: FBgn0003963	FBpp0305228:c.[3525G>A]; FBpp0305227:c.[3456G>A]; FBpp0077723:c.[3504G>A]; FBpp0302929:c.[3504G>A]; FBpp0301730:c.[3525G>A]
2L mapping	539936	SNV	1	C	T	24	100	34	CDS: FBgn0003963, CDS: FBgn0003963, CDS: FBgn0003963, CDS: FBgn0003963, CDS: FBgn0003963, Exon: Exon, Exon: Exon, Gene: FBgn0003963, Misc. feature: contig 2L_1_11 1..50000(1), mRNA: FBgn0003963, mRNA: FBgn0003963, mRNA: FBgn0003963, mRNA: FBgn0003963, mRNA: FBgn0003963	FBpp0305227:c.[3508C>T]; FBpp0305228:c.[3577C>T]; FBpp0301730:c.[3577C>T]; FBpp0077723:c.[3556C>T]; FBpp0302929:c.[3556C>T]
2L mapping	539995	SNV	1	T	G	21	100	34.7619	CDS: FBgn0003963, Exon: Exon, Exon: Exon, Gene: FBgn0003963, Misc. feature: contig 2L_1_11 1..50000(1), mRNA: FBgn0003963, mRNA: FBgn0003963, mRNA: FBgn0003963, mRNA: FBgn0003963, mRNA: FBgn0003963	FBpp0302929:c.3615T>G
2L mapping	540010	SNV	1	G	A	22	95.4545	36.0476	CDS: FBgn0003963, Exon: Exon, Exon: Exon, Gene: FBgn0003963, Misc. feature: contig 2L_1_11 1..50000(1), mRNA: FBgn0003963, mRNA: FBgn0003963, mRNA: FBgn0003963, mRNA: FBgn0003963, mRNA: FBgn0003963	FBpp0302929:c.3630G>A
2L mapping	540097	SNV	1	C	A	25	100	35.12	Exon: Exon, Exon: Exon, Gene: FBgn0003963, Misc. feature: contig 2L_1_11 1..50000(1), mRNA: FBgn0003963, mRNA: FBgn0003963, mRNA: FBgn0003963, mRNA: FBgn0003963, mRNA: FBgn0003963
2L mapping	540119	SNV	1	A	G	23	100	36.3043	Exon: Exon, Exon: Exon, Gene: FBgn0003963, Misc. feature: contig 2L_1_11 1..50000(1), mRNA: FBgn0003963, mRNA: FBgn0003963, mRNA: FBgn0003963, mRNA: FBgn0003963, mRNA: FBgn0003963
2L mapping	540215	SNV	1	G	A	25	96	36.6667	Exon: Exon, Exon: Exon, Gene: FBgn0003963, Misc. feature: contig 2L_1_11 1..50000(1), mRNA: FBgn0003963, mRNA: FBgn0003963, mRNA: FBgn0003963, mRNA: FBgn0003963, mRNA: FBgn0003963
2L mapping	540622	SNV	1	A	G	29	100	35.2069	Exon: Exon, Gene: FBgn0010602, Misc. feature: contig 2L_1_11 1..50000(1), mRNA: FBgn0010602
2L mapping	540630	SNV	1	A	T	30	100	34.8	Exon: Exon, Gene: FBgn0010602, Misc. feature: contig 2L_1_11 1..50000(1), mRNA: FBgn0010602
2L mapping	540666	SNV	1	A	C	31	100	33.9032	Exon: Exon, Gene: FBgn0010602, Misc. feature: contig 2L_1_11 1..50000(1), mRNA: FBgn0010602
2L mapping	540810	SNV	1	A	G	22	100	34.7273	Exon: Exon, Gene: FBgn0010602, Misc. feature: contig 2L_1_11 1..50000(1), mRNA: FBgn0010602
2L mapping	540834	SNV	1	G	A	26	100	34.1538	Exon: Exon, Gene: FBgn0010602, Misc. feature: contig 2L_1_11 1..50000(1), mRNA: FBgn0010602
2L mapping	540873	SNV	1	T	C	22	100	33.7727	Exon: Exon, Gene: FBgn0010602, Misc. feature: contig 2L_1_11 1..50000(1), mRNA: FBgn0010602
2L mapping	540879	SNV	1	T	C	23	100	35.4783	Exon: Exon, Gene: FBgn0010602, Misc. feature: contig 2L_1_11 1..50000(1), mRNA: FBgn0010602
2L mapping	541637	SNV	1	C	T	21	100	31.8095	Exon: Exon, Exon: Exon, Exon: Exon, Gene: FBgn0010602, Misc. feature: contig 2L_1_11 1..50000(1), mRNA: FBgn0010602, mRNA: FBgn0010602, mRNA: FBgn0010602
2L mapping	541726	Deletion	3	TTG	-	16	87.5	32.7143	Exon: Exon, Exon: Exon, Exon: Exon, Exon: Exon, Gene: FBgn0010602, Misc. feature: contig 2L_1_11 1..50000(1), mRNA: FBgn0010602, mRNA: FBgn0010602, mRNA: FBgn0010602, mRNA: FBgn0010602
2L mapping	541774	SNV	1	A	G	11	100	35.7273	CDS: FBgn0010602, CDS: FBgn0010602, CDS: FBgn0010602, CDS: FBgn0010602, Exon: Exon, Exon: Exon, Exon: Exon, Exon: Exon, Gene: FBgn0010602, Misc. feature: contig 2L_1_11 1..50000(1), mRNA: FBgn0010602, mRNA: FBgn0010602, mRNA: FBgn0010602, mRNA: FBgn0010602	FBpp0301731:c.[474T>C]; FBpp0077741:c.[474T>C]; FBpp0077742:c.[474T>C]; FBpp0301732:c.[474T>C]
2L mapping	541864	SNV	1	T	C	15	100	34.9333	CDS: FBgn0010602, CDS: FBgn0010602, CDS: FBgn0010602, CDS: FBgn0010602, Exon: Exon, Exon: Exon, Exon: Exon, Exon: Exon, Gene: FBgn0010602, Misc. feature: contig 2L_1_11 1..50000(1), mRNA: FBgn0010602, mRNA: FBgn0010602, mRNA: FBgn0010602, mRNA: FBgn0010602	FBpp0301731:c.[384A>G]; FBpp0301732:c.[384A>G]; FBpp0077742:c.[384A>G]; FBpp0077741:c.[384A>G]
2L mapping	541975	SNV	1	A	G	15	100	35.4	CDS: FBgn0010602, CDS: FBgn0010602, CDS: FBgn0010602, CDS: FBgn0010602, Exon: Exon, Exon: Exon, Exon: Exon, Exon: Exon, Gene: FBgn0010602, Misc. feature: contig 2L_1_11 1..50000(1), mRNA: FBgn0010602, mRNA: FBgn0010602, mRNA: FBgn0010602, mRNA: FBgn0010602	FBpp0077742:c.[273T>C]; FBpp0301732:c.[273T>C]; FBpp0077741:c.[273T>C]; FBpp0301731:c.[273T>C]
2L mapping	544231	SNV	1	T	C	21	100	34.3333	CDS: FBgn0031260, Exon: Exon, Gene: FBgn0031260, Misc. feature: contig 2L_1_11 1..50000(1), mRNA: FBgn0031260	FBpp0077740:c.246A>G
2L mapping	544283	SNV	1	T	A	19	100	35.5263	Gene: FBgn0031260, Misc. feature: contig 2L_1_11 1..50000(1)	FBpp0077740:c.211-17A>T
2L mapping	544325	SNV	1	T	C	16	100	32.75	Gene: FBgn0031260, Misc. feature: contig 2L_1_11 1..50000(1)	FBpp0077740:c.210+8A>G
2L mapping	544683	SNV	1	G	A	26	100	34.9615	Misc. feature: contig 2L_1_11 1..50000(1)
2L mapping	545044	SNV	1	C	G	17	100	36.7647	Exon: Exon, Gene: FBgn0005660, Misc. feature: contig 2L_1_11 1..50000(1), mRNA: FBgn0005660
2L mapping	545122	SNV	1	A	T	21	100	36.0476	Exon: Exon, Gene: FBgn0005660, Misc. feature: contig 2L_1_11 1..50000(1), mRNA: FBgn0005660
2L mapping	545147	SNV	1	T	C	26	100	34.9615	Exon: Exon, Exon: Exon, Gene: FBgn0005660, Gene: FBgn0031261, Misc. feature: contig 2L_1_11 1..50000(1), mRNA: FBgn0005660, mRNA: FBgn0031261
2L mapping	545404	SNV	1	C	G	13	100	34.3077	CDS: FBgn0031261, Exon: Exon, Exon: Exon, Gene: FBgn0005660, Gene: FBgn0031261, Misc. feature: contig 2L_1_11 1..50000(1), mRNA: FBgn0005660, mRNA: FBgn0031261	FBpp0077724:c.149C>G	FBpp0077724:p.Ala50Gly
2L mapping	545477	SNV	1	C	A	10	100	36.6	CDS: FBgn0031261, Exon: Exon, Exon: Exon, Gene: FBgn0005660, Gene: FBgn0031261, Misc. feature: contig 2L_1_11 1..50000(1), mRNA: FBgn0005660, mRNA: FBgn0031261	FBpp0077724:c.222C>A
2L mapping	545494	SNV	1	A	G	14	100	35.2857	CDS: FBgn0031261, Exon: Exon, Exon: Exon, Gene: FBgn0005660, Gene: FBgn0031261, Misc. feature: contig 2L_1_11 1..50000(1), mRNA: FBgn0005660, mRNA: FBgn0031261	FBpp0077724:c.239A>G	FBpp0077724:p.Glu80Gly
2L mapping	545935	SNV	1	T	C	19	100	33.8947	CDS: FBgn0031261, Exon: Exon, Exon: Exon, Gene: FBgn0005660, Gene: FBgn0031261, Misc. feature: contig 2L_1_11 1..50000(1), mRNA: FBgn0005660, mRNA: FBgn0031261	FBpp0077724:c.429T>C
2L mapping	545986	SNV	1	G	A	17	100	32.4706	CDS: FBgn0031261, Exon: Exon, Exon: Exon, Gene: FBgn0005660, Gene: FBgn0031261, Misc. feature: contig 2L_1_11 1..50000(1), mRNA: FBgn0005660, mRNA: FBgn0031261	FBpp0077724:c.480G>A
2L mapping	546065	SNV	1	T	C	16	100	36.125	CDS: FBgn0031261, Exon: Exon, Exon: Exon, Gene: FBgn0005660, Gene: FBgn0031261, Misc. feature: contig 2L_1_11 1..50000(1), mRNA: FBgn0005660, mRNA: FBgn0031261	FBpp0077724:c.559T>C
2L mapping	546238	SNV	1	T	C	13	100	34.6154	CDS: FBgn0031261, Exon: Exon, Exon: Exon, Gene: FBgn0005660, Gene: FBgn0031261, Misc. feature: contig 2L_1_11 1..50000(1), mRNA: FBgn0005660, mRNA: FBgn0031261	FBpp0077724:c.732T>C
2L mapping	546253	SNV	1	C	G	14	100	37	CDS: FBgn0031261, Exon: Exon, Exon: Exon, Gene: FBgn0005660, Gene: FBgn0031261, Misc. feature: contig 2L_1_11 1..50000(1), mRNA: FBgn0005660, mRNA: FBgn0031261	FBpp0077724:c.747C>G
2L mapping	546265	SNV	1	C	G	19	100	35.3158	CDS: FBgn0031261, Exon: Exon, Exon: Exon, Gene: FBgn0005660, Gene: FBgn0031261, Misc. feature: contig 2L_1_11 1..50000(1), mRNA: FBgn0005660, mRNA: FBgn0031261	FBpp0077724:c.759C>G
2L mapping	546887	SNV	1	G	A	17	100	31.4706	CDS: FBgn0031261, Exon: Exon, Exon: Exon, Gene: FBgn0005660, Gene: FBgn0031261, Misc. feature: contig 2L_1_11 1..50000(1), mRNA: FBgn0005660, mRNA: FBgn0031261	FBpp0077724:c.1260G>A
2L mapping	546929	SNV	1	T	C	24	95.8333	35.0435	CDS: FBgn0031261, Exon: Exon, Exon: Exon, Gene: FBgn0005660, Gene: FBgn0031261, Misc. feature: contig 2L_1_11 1..50000(1), mRNA: FBgn0005660, mRNA: FBgn0031261	FBpp0077724:c.1302T>C
2L mapping	546944	SNV	1	C	T	22	100	35.1364	CDS: FBgn0031261, Exon: Exon, Exon: Exon, Gene: FBgn0005660, Gene: FBgn0031261, Misc. feature: contig 2L_1_11 1..50000(1), mRNA: FBgn0005660, mRNA: FBgn0031261	FBpp0077724:c.1317C>T
2L mapping	546950	SNV	1	G	A	22	100	34.5909	CDS: FBgn0031261, Exon: Exon, Exon: Exon, Gene: FBgn0005660, Gene: FBgn0031261, Misc. feature: contig 2L_1_11 1..50000(1), mRNA: FBgn0005660, mRNA: FBgn0031261	FBpp0077724:c.1323G>A
2L mapping	546973	SNV	1	C	G	23	100	35.4783	Exon: Exon, Exon: Exon, Gene: FBgn0005660, Gene: FBgn0031261, Misc. feature: contig 2L_1_11 1..50000(1), mRNA: FBgn0005660, mRNA: FBgn0031261
2L mapping	547180	SNV	1	A	C	21	100	34.8571	Exon: Exon, Exon: Exon, Gene: FBgn0005660, Misc. feature: contig 2L_1_11 1..50000(1), mRNA: FBgn0005660, mRNA: FBgn0005660, mRNA: FBgn0005660, mRNA: FBgn0005660
2L mapping	547267	SNV	1	A	T	12	91.6667	28.5455	Exon: Exon, Exon: Exon, Gene: FBgn0005660, Misc. feature: contig 2L_1_11 1..50000(1), mRNA: FBgn0005660, mRNA: FBgn0005660, mRNA: FBgn0005660, mRNA: FBgn0005660
2L mapping	547290	Insertion	1	-	A	13	46.1538	32.5	Exon: Exon, Exon: Exon, Gene: FBgn0005660, Misc. feature: contig 2L_1_11 1..50000(1), mRNA: FBgn0005660, mRNA: FBgn0005660, mRNA: FBgn0005660, mRNA: FBgn0005660
2L mapping	547290	SNV	1	T	G	13	53.8462	33.1429	Exon: Exon, Exon: Exon, Gene: FBgn0005660, Misc. feature: contig 2L_1_11 1..50000(1), mRNA: FBgn0005660, mRNA: FBgn0005660, mRNA: FBgn0005660, mRNA: FBgn0005660
2L mapping	547292	SNV	1	G	C	13	46.1538	27.6667	Exon: Exon, Exon: Exon, Gene: FBgn0005660, Misc. feature: contig 2L_1_11 1..50000(1), mRNA: FBgn0005660, mRNA: FBgn0005660, mRNA: FBgn0005660, mRNA: FBgn0005660
2L mapping	547293	SNV	1	A	C	13	53.8462	33.1429	Exon: Exon, Exon: Exon, Gene: FBgn0005660, Misc. feature: contig 2L_1_11 1..50000(1), mRNA: FBgn0005660, mRNA: FBgn0005660, mRNA: FBgn0005660, mRNA: FBgn0005660
2L mapping	547294	Deletion	1	T	-	14	42.8571	33.1667	Exon: Exon, Exon: Exon, Gene: FBgn0005660, Misc. feature: contig 2L_1_11 1..50000(1), mRNA: FBgn0005660, mRNA: FBgn0005660, mRNA: FBgn0005660, mRNA: FBgn0005660
2L mapping	547328	SNV	1	T	C	14	100	35.3571	Exon: Exon, Exon: Exon, Gene: FBgn0005660, Misc. feature: contig 2L_1_11 1..50000(1), mRNA: FBgn0005660, mRNA: FBgn0005660, mRNA: FBgn0005660, mRNA: FBgn0005660
2L mapping	547334	Deletion	3	CGC	-	14	100	36.4286	Exon: Exon, Exon: Exon, Gene: FBgn0005660, Misc. feature: contig 2L_1_11 1..50000(1), mRNA: FBgn0005660, mRNA: FBgn0005660, mRNA: FBgn0005660, mRNA: FBgn0005660
2L mapping	548266	Replacement	3	CAA	G	18	66.6667	34.0556	Gene: FBgn0005660, Misc. feature: contig 2L_1_11 1..50000(1)	FBpp0310465:c.[701-50_701-48delTTGinsC]; FBpp0311554:c.[701-50_701-48delTTGinsC]; FBpp0111767:c.[191-50_191-48delTTGinsC]; FBpp0077739:c.[701-50_701-48delTTGinsC]
2L mapping	548273	MNV	3	AGA	CCC	12	100	33.1389	Gene: FBgn0005660, Misc. feature: contig 2L_1_11 1..50000(1)	FBpp0311554:c.[701-57_701-55delTCTinsGGG]; FBpp0310465:c.[701-57_701-55delTCTinsGGG]; FBpp0111767:c.[191-57_191-55delTCTinsGGG]; FBpp0077739:c.[701-57_701-55delTCTinsGGG]
2L mapping	548277	SNV	1	A	G	12	100	34.25	Gene: FBgn0005660, Misc. feature: contig 2L_1_11 1..50000(1)	FBpp0111767:c.[191-59T>C]; FBpp0077739:c.[701-59T>C]; FBpp0311554:c.[701-59T>C]; FBpp0310465:c.[701-59T>C]
2L mapping	548280	SNV	1	G	A	12	100	36.3333	Gene: FBgn0005660, Misc. feature: contig 2L_1_11 1..50000(1)	FBpp0310465:c.[701-62C>T]; FBpp0311554:c.[701-62C>T]; FBpp0077739:c.[701-62C>T]; FBpp0111767:c.[191-62C>T]
2L mapping	548282	SNV	1	T	A	12	100	33.5833	Gene: FBgn0005660, Misc. feature: contig 2L_1_11 1..50000(1)	FBpp0077739:c.[701-64A>T]; FBpp0111767:c.[191-64A>T]; FBpp0311554:c.[701-64A>T]; FBpp0310465:c.[701-64A>T]
2L mapping	548286	SNV	1	A	G	19	100	34.8421	Gene: FBgn0005660, Misc. feature: contig 2L_1_11 1..50000(1)	FBpp0311554:c.[701-68T>C]; FBpp0111767:c.[191-68T>C]; FBpp0077739:c.[701-68T>C]; FBpp0310465:c.[701-68T>C]
2L mapping	548342	Replacement	2	G	TT	19	47.3684	36	Gene: FBgn0005660, Misc. feature: contig 2L_1_11 1..50000(1)	FBpp0311554:c.[701-124delCinsAA]; FBpp0111767:c.[191-124delCinsAA]; FBpp0310465:c.[701-124delCinsAA]; FBpp0077739:c.[701-124delCinsAA]
2L mapping	548347	SNV	1	C	G	21	38.0952	36	Gene: FBgn0005660, Misc. feature: contig 2L_1_11 1..50000(1)	FBpp0077739:c.[701-129G>C]; FBpp0311554:c.[701-129G>C]; FBpp0111767:c.[191-129G>C]; FBpp0310465:c.[701-129G>C]
2L mapping	548349	SNV	1	A	C	21	42.8571	31	Gene: FBgn0005660, Misc. feature: contig 2L_1_11 1..50000(1)	FBpp0311554:c.[701-131T>G]; FBpp0077739:c.[701-131T>G]; FBpp0310465:c.[701-131T>G]; FBpp0111767:c.[191-131T>G]
2L mapping	548351	SNV	1	A	G	22	40.9091	34	Gene: FBgn0005660, Misc. feature: contig 2L_1_11 1..50000(1)	FBpp0077739:c.[701-133T>C]; FBpp0111767:c.[191-133T>C]; FBpp0311554:c.[701-133T>C]; FBpp0310465:c.[701-133T>C]
2L mapping	548434	Insertion	1	-	A	15	100	32.7333	Gene: FBgn0005660, Misc. feature: contig 2L_1_11 1..50000(1)	FBpp0310465:c.[701-216_701-215insT]; FBpp0077739:c.[701-216_701-215insT]; FBpp0311554:c.[701-216_701-215insT]; FBpp0111767:c.[191-216_191-215insT]
2L mapping	548546	SNV	1	G	A	22	100	35.1818	Gene: FBgn0005660, Misc. feature: contig 2L_1_11 1..50000(1)	FBpp0311554:c.[701-328C>T]; FBpp0310465:c.[701-328C>T]; FBpp0077739:c.[701-328C>T]; FBpp0111767:c.[191-328C>T]
2L mapping	548655	MNV	2	AG	GC	16	100	35.2188	Gene: FBgn0005660, Misc. feature: contig 2L_1_11 1..50000(1)	FBpp0311554:c.[701-438_701-437delCTinsGC]; FBpp0111767:c.[190+370_190+371delCTinsGC]; FBpp0310465:c.[701-438_701-437delCTinsGC]; FBpp0077739:c.[701-438_701-437delCTinsGC]
2L mapping	548658	SNV	1	G	T	16	100	36.75	Gene: FBgn0005660, Misc. feature: contig 2L_1_11 1..50000(1)	FBpp0310465:c.[701-440C>A]; FBpp0311554:c.[701-440C>A]; FBpp0077739:c.[701-440C>A]; FBpp0111767:c.[190+368C>A]
2L mapping	548664	SNV	1	A	C	21	100	36.1429	Gene: FBgn0005660, Misc. feature: contig 2L_1_11 1..50000(1)	FBpp0111767:c.[190+362T>G]; FBpp0311554:c.[701-446T>G]; FBpp0310465:c.[701-446T>G]; FBpp0077739:c.[701-446T>G]
2L mapping	548755	SNV	1	A	C	16	68.75	35.3636	Gene: FBgn0005660, Misc. feature: contig 2L_1_11 1..50000(1)	FBpp0111767:c.[190+271T>G]; FBpp0311554:c.[701-537T>G]; FBpp0077739:c.[701-537T>G]; FBpp0310465:c.[701-537T>G]
2L mapping	548772	SNV	1	T	C	27	100	33.2593	Gene: FBgn0005660, Misc. feature: contig 2L_1_11 1..50000(1)	FBpp0077739:c.[701-554A>G]; FBpp0310465:c.[701-554A>G]; FBpp0311554:c.[701-554A>G]; FBpp0111767:c.[190+254A>G]
2L mapping	548805	SNV	1	C	G	30	96.6667	33.8621	Gene: FBgn0005660, Misc. feature: contig 2L_1_11 1..50000(1)	FBpp0111767:c.[190+221G>C]; FBpp0311554:c.[701-587G>C]; FBpp0310465:c.[701-587G>C]; FBpp0077739:c.[701-587G>C]
2L mapping	548844	SNV	1	G	A	21	100	33.6667	Gene: FBgn0005660, Misc. feature: contig 2L_1_11 1..50000(1)	FBpp0310465:c.[701-626C>T]; FBpp0111767:c.[190+182C>T]; FBpp0311554:c.[701-626C>T]; FBpp0077739:c.[701-626C>T]
2L mapping	548846	SNV	1	C	G	21	100	33.4286	Gene: FBgn0005660, Misc. feature: contig 2L_1_11 1..50000(1)	FBpp0111767:c.[190+180G>C]; FBpp0310465:c.[701-628G>C]; FBpp0311554:c.[701-628G>C]; FBpp0077739:c.[701-628G>C]
2L mapping	548890	SNV	1	T	A	14	100	34.5714	Gene: FBgn0005660, Misc. feature: contig 2L_1_11 1..50000(1)	FBpp0311554:c.[701-672A>T]; FBpp0077739:c.[701-672A>T]; FBpp0310465:c.[701-672A>T]; FBpp0111767:c.[190+136A>T]
2L mapping	548906	SNV	1	G	C	12	100	33.5833	Gene: FBgn0005660, Misc. feature: contig 2L_1_11 1..50000(1)	FBpp0311554:c.[701-688C>G]; FBpp0310465:c.[701-688C>G]; FBpp0077739:c.[701-688C>G]; FBpp0111767:c.[190+120C>G]
2L mapping	548928	MNV	2	TC	GA	13	100	34.4231	Gene: FBgn0005660, Misc. feature: contig 2L_1_11 1..50000(1)	FBpp0111767:c.[190+97_190+98delGAinsTC]; FBpp0077739:c.[701-711_701-710delGAinsTC]; FBpp0311554:c.[701-711_701-710delGAinsTC]; FBpp0310465:c.[701-711_701-710delGAinsTC]
2L mapping	549060	SNV	1	G	A	21	100	30.7619	CDS: FBgn0005660, Exon: Exon, Gene: FBgn0005660, Misc. feature: contig 2L_1_11 1..50000(1), mRNA: FBgn0005660	FBpp0311554:c.[701-842C>T]; FBpp0077739:c.[701-842C>T]; FBpp0111767:c.[156C>T]; FBpp0310465:c.[701-842C>T]
2L mapping	549096	SNV	1	A	G	17	100	35.6471	CDS: FBgn0005660, Exon: Exon, Gene: FBgn0005660, Misc. feature: contig 2L_1_11 1..50000(1), mRNA: FBgn0005660	FBpp0077739:c.[701-878T>C]; FBpp0310465:c.[701-878T>C]; FBpp0311554:c.[701-878T>C]; FBpp0111767:c.[120T>C]
2L mapping	549098	SNV	1	C	T	17	100	34	CDS: FBgn0005660, Exon: Exon, Gene: FBgn0005660, Misc. feature: contig 2L_1_11 1..50000(1), mRNA: FBgn0005660	FBpp0111767:c.[118G>A]; FBpp0310465:c.[701-880G>A]; FBpp0311554:c.[701-880G>A]; FBpp0077739:c.[701-880G>A]	FBpp0111767:p.Gly40Ser
2L mapping	549245	SNV	1	A	G	18	100	35.2778	Exon: Exon, Gene: FBgn0005660, Misc. feature: contig 2L_1_11 1..50000(1), mRNA: FBgn0005660	FBpp0077739:c.[701-1027T>C]; FBpp0310465:c.[701-1027T>C]; FBpp0311554:c.[701-1027T>C]
2L mapping	549339	SNV	1	C	T	19	100	33.6842	Exon: Exon, Gene: FBgn0005660, Misc. feature: contig 2L_1_11 1..50000(1), mRNA: FBgn0005660	FBpp0311554:c.[701-1121G>A]; FBpp0310465:c.[701-1121G>A]; FBpp0077739:c.[701-1121G>A]
2L mapping	549354	SNV	1	G	T	19	94.7368	33.6111	Exon: Exon, Gene: FBgn0005660, Misc. feature: contig 2L_1_11 1..50000(1), mRNA: FBgn0005660	FBpp0310465:c.[701-1136C>A]; FBpp0077739:c.[701-1136C>A]; FBpp0311554:c.[701-1136C>A]
2L mapping	549403	Deletion	5	TATTA	-	19	89.4737	34	Exon: Exon, Gene: FBgn0005660, Misc. feature: contig 2L_1_11 1..50000(1), mRNA: FBgn0005660	FBpp0311554:c.[701-1189_701-1185delTAATA]; FBpp0077739:c.[701-1189_701-1185delTAATA]; FBpp0310465:c.[701-1189_701-1185delTAATA]
2L mapping	549424	SNV	1	T	C	23	95.6522	34.6818	Exon: Exon, Gene: FBgn0005660, Misc. feature: contig 2L_1_11 1..50000(1), mRNA: FBgn0005660	FBpp0310465:c.[701-1206A>G]; FBpp0077739:c.[701-1206A>G]; FBpp0311554:c.[701-1206A>G]
2L mapping	549801	SNV	1	A	T	11	100	36.6364	Gene: FBgn0005660, Misc. feature: contig 2L_1_11 1..50000(1)	FBpp0077739:c.[700+1357T>A]; FBpp0310465:c.[700+1357T>A]; FBpp0311554:c.[700+1357T>A]
2L mapping	549814	SNV	1	T	G	12	100	34.6667	Gene: FBgn0005660, Misc. feature: contig 2L_1_11 1..50000(1)	FBpp0310465:c.[700+1344A>C]; FBpp0077739:c.[700+1344A>C]; FBpp0311554:c.[700+1344A>C]
2L mapping	549850	SNV	1	G	C	12	100	31.1667	Gene: FBgn0005660, Misc. feature: contig 2L_1_11 1..50000(1)	FBpp0311554:c.[700+1308C>G]; FBpp0077739:c.[700+1308C>G]; FBpp0310465:c.[700+1308C>G]
2L mapping	549912	SNV	1	T	C	20	100	33.7	Gene: FBgn0005660, Misc. feature: contig 2L_1_11 1..50000(1)	FBpp0310465:c.[700+1246A>G]; FBpp0077739:c.[700+1246A>G]; FBpp0311554:c.[700+1246A>G]
2L mapping	549934	SNV	1	G	A	26	96.1538	36.04	Gene: FBgn0005660, Misc. feature: contig 2L_1_11 1..50000(1)	FBpp0077739:c.[700+1224C>T]; FBpp0311554:c.[700+1224C>T]; FBpp0310465:c.[700+1224C>T]
2L mapping	550013	SNV	1	T	G	24	100	34	Gene: FBgn0005660, Misc. feature: contig 2L_1_12 1..50000(1)	FBpp0311554:c.[700+1145A>C]; FBpp0310465:c.[700+1145A>C]; FBpp0077739:c.[700+1145A>C]
2L mapping	550059	SNV	1	G	A	19	100	35.0526	Gene: FBgn0005660, Misc. feature: contig 2L_1_12 1..50000(1)	FBpp0077739:c.[700+1099C>T]; FBpp0311554:c.[700+1099C>T]; FBpp0310465:c.[700+1099C>T]
2L mapping	550325	SNV	1	G	T	21	100	35.5238	Gene: FBgn0005660, Misc. feature: contig 2L_1_12 1..50000(1)	FBpp0310465:c.[700+833C>A]; FBpp0311554:c.[700+833C>A]; FBpp0077739:c.[700+833C>A]
2L mapping	550549	Deletion	4	CCCC	-	23	47.8261	30.2727	Gene: FBgn0005660, Misc. feature: contig 2L_1_12 1..50000(1)	FBpp0311554:c.[700+606_700+609delGGGG]; FBpp0310465:c.[700+606_700+609delGGGG]; FBpp0077739:c.[700+606_700+609delGGGG]
2L mapping	550555	SNV	1	C	A	23	47.8261	30.5455	Gene: FBgn0005660, Misc. feature: contig 2L_1_12 1..50000(1)	FBpp0077739:c.[700+603G>T]; FBpp0311554:c.[700+603G>T]; FBpp0310465:c.[700+603G>T]
2L mapping	550560	Deletion	4	TCCC	-	15	73.3333	28.8182	Gene: FBgn0005660, Misc. feature: contig 2L_1_12 1..50000(1)	FBpp0077739:c.[700+595_700+598delGGGA]; FBpp0310465:c.[700+595_700+598delGGGA]; FBpp0311554:c.[700+595_700+598delGGGA]
2L mapping	550660	SNV	1	A	G	26	100	35.4231	Gene: FBgn0005660, Misc. feature: contig 2L_1_12 1..50000(1)	FBpp0077739:c.[700+498T>C]; FBpp0311554:c.[700+498T>C]; FBpp0310465:c.[700+498T>C]
2L mapping	550724	SNV	1	G	A	29	100	31.4828	Gene: FBgn0005660, Misc. feature: contig 2L_1_12 1..50000(1)	FBpp0310465:c.[700+434C>T]; FBpp0311554:c.[700+434C>T]; FBpp0077739:c.[700+434C>T]
2L mapping	551255	SNV	1	T	G	22	100	34.6364	CDS: FBgn0005660, CDS: FBgn0005660, CDS: FBgn0005660, Exon: Exon, Exon: Exon, Gene: FBgn0005660, Misc. feature: contig 2L_1_12 1..50000(1), mRNA: FBgn0005660, mRNA: FBgn0005660, mRNA: FBgn0005660	FBpp0310465:c.[603A>C]; FBpp0311554:c.[603A>C]; FBpp0077739:c.[603A>C]
2L mapping	551408	SNV	1	C	T	17	100	34.9412	CDS: FBgn0005660, CDS: FBgn0005660, CDS: FBgn0005660, Exon: Exon, Exon: Exon, Gene: FBgn0005660, Misc. feature: contig 2L_1_12 1..50000(1), mRNA: FBgn0005660, mRNA: FBgn0005660, mRNA: FBgn0005660	FBpp0310465:c.[450G>A]; FBpp0311554:c.[450G>A]; FBpp0077739:c.[450G>A]
2L mapping	551441	SNV	1	C	T	11	100	28.7273	CDS: FBgn0005660, CDS: FBgn0005660, CDS: FBgn0005660, Exon: Exon, Exon: Exon, Gene: FBgn0005660, Misc. feature: contig 2L_1_12 1..50000(1), mRNA: FBgn0005660, mRNA: FBgn0005660, mRNA: FBgn0005660	FBpp0077739:c.[417G>A]; FBpp0310465:c.[417G>A]; FBpp0311554:c.[417G>A]
2L mapping	551463	SNV	1	C	T	14	100	31.8571	CDS: FBgn0005660, CDS: FBgn0005660, CDS: FBgn0005660, Exon: Exon, Exon: Exon, Gene: FBgn0005660, Misc. feature: contig 2L_1_12 1..50000(1), mRNA: FBgn0005660, mRNA: FBgn0005660, mRNA: FBgn0005660	FBpp0077739:c.[395G>A]; FBpp0311554:c.[395G>A]; FBpp0310465:c.[395G>A]	FBpp0077739:p.[Arg132Lys]; FBpp0311554:p.[Arg132Lys]; FBpp0310465:p.[Arg132Lys]
2L mapping	551510	SNV	1	G	T	15	93.3333	32.7143	CDS: FBgn0005660, CDS: FBgn0005660, CDS: FBgn0005660, Exon: Exon, Exon: Exon, Gene: FBgn0005660, Misc. feature: contig 2L_1_12 1..50000(1), mRNA: FBgn0005660, mRNA: FBgn0005660, mRNA: FBgn0005660	FBpp0310465:c.[348C>A]; FBpp0311554:c.[348C>A]; FBpp0077739:c.[348C>A]
2L mapping	551639	SNV	1	G	T	25	100	35.44	CDS: FBgn0005660, CDS: FBgn0005660, CDS: FBgn0005660, Exon: Exon, Exon: Exon, Gene: FBgn0005660, Misc. feature: contig 2L_1_12 1..50000(1), mRNA: FBgn0005660, mRNA: FBgn0005660, mRNA: FBgn0005660	FBpp0077739:c.[219C>A]; FBpp0310465:c.[219C>A]; FBpp0311554:c.[219C>A]
2L mapping	551672	SNV	1	T	C	18	100	34.7222	CDS: FBgn0005660, CDS: FBgn0005660, CDS: FBgn0005660, Exon: Exon, Exon: Exon, Gene: FBgn0005660, Misc. feature: contig 2L_1_12 1..50000(1), mRNA: FBgn0005660, mRNA: FBgn0005660, mRNA: FBgn0005660	FBpp0310465:c.[186A>G]; FBpp0077739:c.[186A>G]; FBpp0311554:c.[186A>G]
2L mapping	551691	MNV	2	GT	TC	20	100	35.425	CDS: FBgn0005660, CDS: FBgn0005660, CDS: FBgn0005660, Exon: Exon, Exon: Exon, Gene: FBgn0005660, Misc. feature: contig 2L_1_12 1..50000(1), mRNA: FBgn0005660, mRNA: FBgn0005660, mRNA: FBgn0005660	FBpp0311554:c.[166_167delACinsGA]; FBpp0077739:c.[166_167delACinsGA]; FBpp0310465:c.[166_167delACinsGA]	FBpp0311554:p.[Thr56Glu]; FBpp0077739:p.[Thr56Glu]; FBpp0310465:p.[Thr56Glu]
2L mapping	551846	SNV	1	T	C	28	100	33.5357	CDS: FBgn0005660, CDS: FBgn0005660, CDS: FBgn0005660, Exon: Exon, Exon: Exon, Gene: FBgn0005660, Misc. feature: contig 2L_1_12 1..50000(1), mRNA: FBgn0005660, mRNA: FBgn0005660, mRNA: FBgn0005660	FBpp0077739:c.[12A>G]; FBpp0311554:c.[12A>G]; FBpp0310465:c.[12A>G]
2L mapping	552224	SNV	1	A	G	32	100	33.625	Exon: Exon, Exon: Exon, Gene: FBgn0005660, Misc. feature: contig 2L_1_12 1..50000(1), mRNA: FBgn0005660, mRNA: FBgn0005660, mRNA: FBgn0005660
2L mapping	554030	SNV	1	A	G	30	100	36.7333	CDS: FBgn0260933, CDS: FBgn0260933, Exon: Exon, Gene: FBgn0260933, Misc. feature: contig 2L_1_12 1..50000(1), mRNA: FBgn0260933, mRNA: FBgn0260933	FBpp0292775:c.[4284T>C]; FBpp0077738:c.[4419T>C]
2L mapping	554520	SNV	1	A	G	14	100	31.5	CDS: FBgn0260933, CDS: FBgn0260933, Exon: Exon, Gene: FBgn0260933, Misc. feature: contig 2L_1_12 1..50000(1), mRNA: FBgn0260933, mRNA: FBgn0260933	FBpp0292775:c.[3855T>C]; FBpp0077738:c.[3990T>C]
2L mapping	554571	SNV	1	C	A	22	100	34.2273	CDS: FBgn0260933, CDS: FBgn0260933, Exon: Exon, Gene: FBgn0260933, Misc. feature: contig 2L_1_12 1..50000(1), mRNA: FBgn0260933, mRNA: FBgn0260933	FBpp0077738:c.[3939G>T]; FBpp0292775:c.[3804G>T]
2L mapping	554712	SNV	1	A	T	25	100	33.56	CDS: FBgn0260933, CDS: FBgn0260933, Exon: Exon, Gene: FBgn0260933, Misc. feature: contig 2L_1_12 1..50000(1), mRNA: FBgn0260933, mRNA: FBgn0260933	FBpp0292775:c.[3663T>A]; FBpp0077738:c.[3798T>A]
2L mapping	555027	SNV	1	G	C	27	100	33.2222	CDS: FBgn0260933, CDS: FBgn0260933, Exon: Exon, Gene: FBgn0260933, Misc. feature: contig 2L_1_12 1..50000(1), mRNA: FBgn0260933, mRNA: FBgn0260933	FBpp0077738:c.[3483C>G]; FBpp0292775:c.[3348C>G]
2L mapping	555033	SNV	1	A	G	26	100	34.0769	CDS: FBgn0260933, CDS: FBgn0260933, Exon: Exon, Gene: FBgn0260933, Misc. feature: contig 2L_1_12 1..50000(1), mRNA: FBgn0260933, mRNA: FBgn0260933	FBpp0077738:c.[3477T>C]; FBpp0292775:c.[3342T>C]
2L mapping	555036	SNV	1	C	T	27	100	33.7407	CDS: FBgn0260933, CDS: FBgn0260933, Exon: Exon, Gene: FBgn0260933, Misc. feature: contig 2L_1_12 1..50000(1), mRNA: FBgn0260933, mRNA: FBgn0260933	FBpp0077738:c.[3474G>A]; FBpp0292775:c.[3339G>A]
2L mapping	555222	SNV	1	T	G	22	100	35.4091	CDS: FBgn0260933, CDS: FBgn0260933, Exon: Exon, Gene: FBgn0260933, Misc. feature: contig 2L_1_12 1..50000(1), mRNA: FBgn0260933, mRNA: FBgn0260933	FBpp0292775:c.[3153A>C]; FBpp0077738:c.[3288A>C]
2L mapping	555225	SNV	1	C	G	23	100	33.6087	CDS: FBgn0260933, CDS: FBgn0260933, Exon: Exon, Gene: FBgn0260933, Misc. feature: contig 2L_1_12 1..50000(1), mRNA: FBgn0260933, mRNA: FBgn0260933	FBpp0292775:c.[3150G>C]; FBpp0077738:c.[3285G>C]
2L mapping	555513	SNV	1	C	G	22	100	32.8636	CDS: FBgn0260933, CDS: FBgn0260933, Exon: Exon, Gene: FBgn0260933, Misc. feature: contig 2L_1_12 1..50000(1), mRNA: FBgn0260933, mRNA: FBgn0260933	FBpp0292775:c.[2925G>C]; FBpp0077738:c.[3060G>C]
2L mapping	555876	SNV	1	A	T	12	100	32.1667	CDS: FBgn0260933, CDS: FBgn0260933, Exon: Exon, Gene: FBgn0260933, Misc. feature: contig 2L_1_12 1..50000(1), mRNA: FBgn0260933, mRNA: FBgn0260933	FBpp0292775:c.[2562T>A]; FBpp0077738:c.[2697T>A]
2L mapping	555960	SNV	1	C	G	21	100	35.4762	CDS: FBgn0260933, CDS: FBgn0260933, Exon: Exon, Gene: FBgn0260933, Misc. feature: contig 2L_1_12 1..50000(1), mRNA: FBgn0260933, mRNA: FBgn0260933	FBpp0292775:c.[2478G>C]; FBpp0077738:c.[2613G>C]
2L mapping	555990	SNV	1	C	T	21	100	34.8571	CDS: FBgn0260933, CDS: FBgn0260933, Exon: Exon, Gene: FBgn0260933, Misc. feature: contig 2L_1_12 1..50000(1), mRNA: FBgn0260933, mRNA: FBgn0260933	FBpp0292775:c.[2448G>A]; FBpp0077738:c.[2583G>A]
2L mapping	556275	SNV	1	T	C	26	100	33	CDS: FBgn0260933, CDS: FBgn0260933, Exon: Exon, Gene: FBgn0260933, Misc. feature: contig 2L_1_12 1..50000(1), mRNA: FBgn0260933, mRNA: FBgn0260933	FBpp0077738:c.[2298A>G]; FBpp0292775:c.[2163A>G]
2L mapping	556365	SNV	1	T	C	24	100	34.125	CDS: FBgn0260933, CDS: FBgn0260933, Exon: Exon, Gene: FBgn0260933, Misc. feature: contig 2L_1_12 1..50000(1), mRNA: FBgn0260933, mRNA: FBgn0260933	FBpp0077738:c.[2208A>G]; FBpp0292775:c.[2073A>G]
2L mapping	556466	SNV	1	A	G	32	100	35.9375	CDS: FBgn0260933, CDS: FBgn0260933, Exon: Exon, Gene: FBgn0260933, Misc. feature: contig 2L_1_12 1..50000(1), mRNA: FBgn0260933, mRNA: FBgn0260933	FBpp0292775:c.[1972T>C]; FBpp0077738:c.[2107T>C]
2L mapping	556518	SNV	1	T	C	28	100	36.2143	CDS: FBgn0260933, CDS: FBgn0260933, Exon: Exon, Gene: FBgn0260933, Misc. feature: contig 2L_1_12 1..50000(1), mRNA: FBgn0260933, mRNA: FBgn0260933	FBpp0077738:c.[2055A>G]; FBpp0292775:c.[1920A>G]
2L mapping	556579	SNV	1	C	T	21	100	36.8095	CDS: FBgn0260933, CDS: FBgn0260933, Exon: Exon, Gene: FBgn0260933, Misc. feature: contig 2L_1_12 1..50000(1), mRNA: FBgn0260933, mRNA: FBgn0260933	FBpp0077738:c.[1994G>A]; FBpp0292775:c.[1859G>A]	FBpp0077738:p.[Ser665Asn]; FBpp0292775:p.[Ser620Asn]
2L mapping	556857	SNV	1	A	C	29	96.5517	34.5357	CDS: FBgn0260933, CDS: FBgn0260933, Exon: Exon, Gene: FBgn0260933, Misc. feature: contig 2L_1_12 1..50000(1), mRNA: FBgn0260933, mRNA: FBgn0260933	FBpp0292775:c.[1581T>G]; FBpp0077738:c.[1716T>G]
2L mapping	556884	SNV	1	C	T	25	100	33.52	CDS: FBgn0260933, CDS: FBgn0260933, Exon: Exon, Gene: FBgn0260933, Misc. feature: contig 2L_1_12 1..50000(1), mRNA: FBgn0260933, mRNA: FBgn0260933	FBpp0077738:c.[1689G>A]; FBpp0292775:c.[1554G>A]
2L mapping	556950	SNV	1	A	G	25	96	33.4167	CDS: FBgn0260933, CDS: FBgn0260933, Exon: Exon, Gene: FBgn0260933, Misc. feature: contig 2L_1_12 1..50000(1), mRNA: FBgn0260933, mRNA: FBgn0260933	FBpp0077738:c.[1623T>C]; FBpp0292775:c.[1488T>C]
2L mapping	556968	SNV	1	T	A	25	100	33	CDS: FBgn0260933, CDS: FBgn0260933, Exon: Exon, Gene: FBgn0260933, Misc. feature: contig 2L_1_12 1..50000(1), mRNA: FBgn0260933, mRNA: FBgn0260933	FBpp0077738:c.[1605A>T]; FBpp0292775:c.[1470A>T]
2L mapping	556998	SNV	1	G	A	24	100	34.7917	CDS: FBgn0260933, CDS: FBgn0260933, Exon: Exon, Gene: FBgn0260933, Misc. feature: contig 2L_1_12 1..50000(1), mRNA: FBgn0260933, mRNA: FBgn0260933	FBpp0077738:c.[1575C>T]; FBpp0292775:c.[1440C>T]
2L mapping	557040	SNV	1	T	C	22	100	35.4545	CDS: FBgn0260933, CDS: FBgn0260933, Exon: Exon, Gene: FBgn0260933, Misc. feature: contig 2L_1_12 1..50000(1), mRNA: FBgn0260933, mRNA: FBgn0260933	FBpp0292775:c.[1398A>G]; FBpp0077738:c.[1533A>G]
2L mapping	557699	SNV	1	A	G	19	94.7368	31.1111	Gene: FBgn0260933, Misc. feature: contig 2L_1_12 1..50000(1)	FBpp0077738:c.[907+23T>C]; FBpp0292775:c.[772+23T>C]
2L mapping	558389	SNV	1	C	T	20	100	34.7	CDS: FBgn0260933, CDS: FBgn0260933, Exon: Exon, Gene: FBgn0260933, Misc. feature: contig 2L_1_12 1..50000(1), mRNA: FBgn0260933, mRNA: FBgn0260933	FBpp0077738:c.[300G>A]; FBpp0292775:c.[165G>A]
2L mapping	561121	SNV	1	C	A	11	100	32.0909	CDS: FBgn0031264, CDS: FBgn0031264, CDS: FBgn0031264, CDS: FBgn0031264, Exon: Exon, Exon: Exon, Gene: FBgn0031264, Misc. feature: contig 2L_1_12 1..50000(1), mRNA: FBgn0031264, mRNA: FBgn0031264, mRNA: FBgn0031264, mRNA: FBgn0031264	FBpp0304619:c.[2061G>T]; FBpp0304618:c.[2061G>T]; FBpp0077736:c.[2061G>T]; FBpp0311648:c.[2061G>T]
2L mapping	561187	SNV	1	C	T	22	100	31.5909	CDS: FBgn0031264, CDS: FBgn0031264, CDS: FBgn0031264, CDS: FBgn0031264, Exon: Exon, Exon: Exon, Gene: FBgn0031264, Misc. feature: contig 2L_1_12 1..50000(1), mRNA: FBgn0031264, mRNA: FBgn0031264, mRNA: FBgn0031264, mRNA: FBgn0031264	FBpp0304618:c.[1995G>A]; FBpp0311648:c.[1995G>A]; FBpp0077736:c.[1995G>A]; FBpp0304619:c.[1995G>A]
2L mapping	561561	SNV	1	G	T	12	91.6667	31.1818	CDS: FBgn0031264, CDS: FBgn0031264, CDS: FBgn0031264, CDS: FBgn0031264, Exon: Exon, Exon: Exon, Gene: FBgn0031264, Misc. feature: contig 2L_1_12 1..50000(1), mRNA: FBgn0031264, mRNA: FBgn0031264, mRNA: FBgn0031264, mRNA: FBgn0031264	FBpp0304618:c.[1621C>A]; FBpp0077736:c.[1621C>A]; FBpp0311648:c.[1621C>A]; FBpp0304619:c.[1621C>A]	FBpp0304618:p.[Pro541Thr]; FBpp0077736:p.[Pro541Thr]; FBpp0311648:p.[Pro541Thr]; FBpp0304619:p.[Pro541Thr]
2L mapping	561637	SNV	1	C	T	17	41.1765	35.8571	CDS: FBgn0031264, CDS: FBgn0031264, CDS: FBgn0031264, CDS: FBgn0031264, Exon: Exon, Exon: Exon, Gene: FBgn0031264, Misc. feature: contig 2L_1_12 1..50000(1), mRNA: FBgn0031264, mRNA: FBgn0031264, mRNA: FBgn0031264, mRNA: FBgn0031264	FBpp0311648:c.[1545G>A]; FBpp0077736:c.[1545G>A]; FBpp0304618:c.[1545G>A]; FBpp0304619:c.[1545G>A]
2L mapping	561644	SNV	1	G	A	20	40	30.75	CDS: FBgn0031264, CDS: FBgn0031264, CDS: FBgn0031264, CDS: FBgn0031264, Exon: Exon, Exon: Exon, Gene: FBgn0031264, Misc. feature: contig 2L_1_12 1..50000(1), mRNA: FBgn0031264, mRNA: FBgn0031264, mRNA: FBgn0031264, mRNA: FBgn0031264	FBpp0304618:c.[1538C>T]; FBpp0077736:c.[1538C>T]; FBpp0304619:c.[1538C>T]; FBpp0311648:c.[1538C>T]	FBpp0304618:p.[Pro513Leu]; FBpp0077736:p.[Pro513Leu]; FBpp0304619:p.[Pro513Leu]; FBpp0311648:p.[Pro513Leu]
2L mapping	561646	SNV	1	T	A	20	40	30	CDS: FBgn0031264, CDS: FBgn0031264, CDS: FBgn0031264, CDS: FBgn0031264, Exon: Exon, Exon: Exon, Gene: FBgn0031264, Misc. feature: contig 2L_1_12 1..50000(1), mRNA: FBgn0031264, mRNA: FBgn0031264, mRNA: FBgn0031264, mRNA: FBgn0031264	FBpp0304618:c.[1536A>T]; FBpp0311648:c.[1536A>T]; FBpp0077736:c.[1536A>T]; FBpp0304619:c.[1536A>T]
2L mapping	561650	SNV	1	T	G	21	52.381	33.3636	CDS: FBgn0031264, CDS: FBgn0031264, CDS: FBgn0031264, CDS: FBgn0031264, Exon: Exon, Exon: Exon, Gene: FBgn0031264, Misc. feature: contig 2L_1_12 1..50000(1), mRNA: FBgn0031264, mRNA: FBgn0031264, mRNA: FBgn0031264, mRNA: FBgn0031264	FBpp0077736:c.[1532A>C]; FBpp0304619:c.[1532A>C]; FBpp0304618:c.[1532A>C]; FBpp0311648:c.[1532A>C]	FBpp0077736:p.[Glu511Ala]; FBpp0304619:p.[Glu511Ala]; FBpp0304618:p.[Glu511Ala]; FBpp0311648:p.[Glu511Ala]
2L mapping	561652	SNV	1	A	G	21	42.8571	31.6667	CDS: FBgn0031264, CDS: FBgn0031264, CDS: FBgn0031264, CDS: FBgn0031264, Exon: Exon, Exon: Exon, Gene: FBgn0031264, Misc. feature: contig 2L_1_12 1..50000(1), mRNA: FBgn0031264, mRNA: FBgn0031264, mRNA: FBgn0031264, mRNA: FBgn0031264	FBpp0077736:c.[1530T>C]; FBpp0304618:c.[1530T>C]; FBpp0311648:c.[1530T>C]; FBpp0304619:c.[1530T>C]
2L mapping	561655	SNV	1	C	T	23	47.8261	32.7273	CDS: FBgn0031264, CDS: FBgn0031264, CDS: FBgn0031264, CDS: FBgn0031264, Exon: Exon, Exon: Exon, Gene: FBgn0031264, Misc. feature: contig 2L_1_12 1..50000(1), mRNA: FBgn0031264, mRNA: FBgn0031264, mRNA: FBgn0031264, mRNA: FBgn0031264	FBpp0077736:c.[1527G>A]; FBpp0311648:c.[1527G>A]; FBpp0304618:c.[1527G>A]; FBpp0304619:c.[1527G>A]
2L mapping	561658	SNV	1	C	T	24	91.6667	30.9545	CDS: FBgn0031264, CDS: FBgn0031264, CDS: FBgn0031264, CDS: FBgn0031264, Exon: Exon, Exon: Exon, Gene: FBgn0031264, Misc. feature: contig 2L_1_12 1..50000(1), mRNA: FBgn0031264, mRNA: FBgn0031264, mRNA: FBgn0031264, mRNA: FBgn0031264	FBpp0311648:c.[1524G>A]; FBpp0077736:c.[1524G>A]; FBpp0304618:c.[1524G>A]; FBpp0304619:c.[1524G>A]
2L mapping	561679	SNV	1	T	C	24	75	34.2222	CDS: FBgn0031264, CDS: FBgn0031264, CDS: FBgn0031264, CDS: FBgn0031264, Exon: Exon, Exon: Exon, Gene: FBgn0031264, Misc. feature: contig 2L_1_12 1..50000(1), mRNA: FBgn0031264, mRNA: FBgn0031264, mRNA: FBgn0031264, mRNA: FBgn0031264	FBpp0311648:c.[1503A>G]; FBpp0304619:c.[1503A>G]; FBpp0304618:c.[1503A>G]; FBpp0077736:c.[1503A>G]
2L mapping	561704	SNV	1	T	C	21	100	34.1429	CDS: FBgn0031264, CDS: FBgn0031264, CDS: FBgn0031264, CDS: FBgn0031264, Exon: Exon, Exon: Exon, Gene: FBgn0031264, Misc. feature: contig 2L_1_12 1..50000(1), mRNA: FBgn0031264, mRNA: FBgn0031264, mRNA: FBgn0031264, mRNA: FBgn0031264	FBpp0304619:c.[1478A>G]; FBpp0311648:c.[1478A>G]; FBpp0077736:c.[1478A>G]; FBpp0304618:c.[1478A>G]	FBpp0304619:p.[Gln493Arg]; FBpp0311648:p.[Gln493Arg]; FBpp0077736:p.[Gln493Arg]; FBpp0304618:p.[Gln493Arg]
2L mapping	561727	SNV	1	G	A	21	100	29.3333	CDS: FBgn0031264, CDS: FBgn0031264, CDS: FBgn0031264, CDS: FBgn0031264, Exon: Exon, Exon: Exon, Gene: FBgn0031264, Misc. feature: contig 2L_1_12 1..50000(1), mRNA: FBgn0031264, mRNA: FBgn0031264, mRNA: FBgn0031264, mRNA: FBgn0031264	FBpp0304619:c.[1455C>T]; FBpp0311648:c.[1455C>T]; FBpp0077736:c.[1455C>T]; FBpp0304618:c.[1455C>T]
2L mapping	561730	SNV	1	A	G	22	100	31.9091	CDS: FBgn0031264, CDS: FBgn0031264, CDS: FBgn0031264, CDS: FBgn0031264, Exon: Exon, Exon: Exon, Gene: FBgn0031264, Misc. feature: contig 2L_1_12 1..50000(1), mRNA: FBgn0031264, mRNA: FBgn0031264, mRNA: FBgn0031264, mRNA: FBgn0031264	FBpp0304618:c.[1452T>C]; FBpp0311648:c.[1452T>C]; FBpp0077736:c.[1452T>C]; FBpp0304619:c.[1452T>C]
2L mapping	561756	SNV	1	G	A	24	100	33.4167	CDS: FBgn0031264, CDS: FBgn0031264, CDS: FBgn0031264, CDS: FBgn0031264, Exon: Exon, Exon: Exon, Gene: FBgn0031264, Misc. feature: contig 2L_1_12 1..50000(1), mRNA: FBgn0031264, mRNA: FBgn0031264, mRNA: FBgn0031264, mRNA: FBgn0031264	FBpp0077736:c.[1426C>T]; FBpp0311648:c.[1426C>T]; FBpp0304619:c.[1426C>T]; FBpp0304618:c.[1426C>T]	FBpp0077736:p.[Pro476Ser]; FBpp0311648:p.[Pro476Ser]; FBpp0304619:p.[Pro476Ser]; FBpp0304618:p.[Pro476Ser]
2L mapping	561787	SNV	1	A	G	18	94.4444	32	CDS: FBgn0031264, CDS: FBgn0031264, CDS: FBgn0031264, CDS: FBgn0031264, Exon: Exon, Exon: Exon, Gene: FBgn0031264, Misc. feature: contig 2L_1_12 1..50000(1), mRNA: FBgn0031264, mRNA: FBgn0031264, mRNA: FBgn0031264, mRNA: FBgn0031264	FBpp0304618:c.[1395T>C]; FBpp0077736:c.[1395T>C]; FBpp0304619:c.[1395T>C]; FBpp0311648:c.[1395T>C]
2L mapping	561796	SNV	1	T	A	18	100	34.4444	CDS: FBgn0031264, CDS: FBgn0031264, CDS: FBgn0031264, CDS: FBgn0031264, Exon: Exon, Exon: Exon, Gene: FBgn0031264, Misc. feature: contig 2L_1_12 1..50000(1), mRNA: FBgn0031264, mRNA: FBgn0031264, mRNA: FBgn0031264, mRNA: FBgn0031264	FBpp0304619:c.[1386A>T]; FBpp0311648:c.[1386A>T]; FBpp0304618:c.[1386A>T]; FBpp0077736:c.[1386A>T]
2L mapping	561799	SNV	1	T	C	17	100	34.4706	CDS: FBgn0031264, CDS: FBgn0031264, CDS: FBgn0031264, CDS: FBgn0031264, Exon: Exon, Exon: Exon, Gene: FBgn0031264, Misc. feature: contig 2L_1_12 1..50000(1), mRNA: FBgn0031264, mRNA: FBgn0031264, mRNA: FBgn0031264, mRNA: FBgn0031264	FBpp0077736:c.[1383A>G]; FBpp0311648:c.[1383A>G]; FBpp0304619:c.[1383A>G]; FBpp0304618:c.[1383A>G]
2L mapping	561801	MNV	2	GG	TT	17	100	35.7647	CDS: FBgn0031264, CDS: FBgn0031264, CDS: FBgn0031264, CDS: FBgn0031264, Exon: Exon, Exon: Exon, Gene: FBgn0031264, Misc. feature: contig 2L_1_12 1..50000(1), mRNA: FBgn0031264, mRNA: FBgn0031264, mRNA: FBgn0031264, mRNA: FBgn0031264	FBpp0304619:c.[1380_1381delCCinsAA]; FBpp0311648:c.[1380_1381delCCinsAA]; FBpp0077736:c.[1380_1381delCCinsAA]; FBpp0304618:c.[1380_1381delCCinsAA]	FBpp0304619:p.[Pro461Thr]; FBpp0311648:p.[Pro461Thr]; FBpp0077736:p.[Pro461Thr]; FBpp0304618:p.[Pro461Thr]
2L mapping	561970	SNV	1	T	C	15	100	34	CDS: FBgn0031264, CDS: FBgn0031264, CDS: FBgn0031264, CDS: FBgn0031264, Exon: Exon, Exon: Exon, Gene: FBgn0031264, Misc. feature: contig 2L_1_12 1..50000(1), mRNA: FBgn0031264, mRNA: FBgn0031264, mRNA: FBgn0031264, mRNA: FBgn0031264	FBpp0311648:c.[1212A>G]; FBpp0077736:c.[1212A>G]; FBpp0304618:c.[1212A>G]; FBpp0304619:c.[1212A>G]
2L mapping	562318	SNV	1	T	G	19	100	34.3158	CDS: FBgn0031264, CDS: FBgn0031264, CDS: FBgn0031264, CDS: FBgn0031264, Exon: Exon, Exon: Exon, Gene: FBgn0031264, Misc. feature: contig 2L_1_12 1..50000(1), mRNA: FBgn0031264, mRNA: FBgn0031264, mRNA: FBgn0031264, mRNA: FBgn0031264	FBpp0304618:c.[864A>C]; FBpp0077736:c.[864A>C]; FBpp0304619:c.[864A>C]; FBpp0311648:c.[864A>C]
2L mapping	562320	SNV	1	G	A	19	94.7368	32.1667	CDS: FBgn0031264, CDS: FBgn0031264, CDS: FBgn0031264, CDS: FBgn0031264, Exon: Exon, Exon: Exon, Gene: FBgn0031264, Misc. feature: contig 2L_1_12 1..50000(1), mRNA: FBgn0031264, mRNA: FBgn0031264, mRNA: FBgn0031264, mRNA: FBgn0031264	FBpp0077736:c.[862C>T]; FBpp0311648:c.[862C>T]; FBpp0304618:c.[862C>T]; FBpp0304619:c.[862C>T]	FBpp0077736:p.[Pro288Ser]; FBpp0311648:p.[Pro288Ser]; FBpp0304618:p.[Pro288Ser]; FBpp0304619:p.[Pro288Ser]
2L mapping	562424	SNV	1	A	G	13	100	33.5385	CDS: FBgn0031264, CDS: FBgn0031264, CDS: FBgn0031264, CDS: FBgn0031264, Exon: Exon, Exon: Exon, Gene: FBgn0031264, Misc. feature: contig 2L_1_12 1..50000(1), mRNA: FBgn0031264, mRNA: FBgn0031264, mRNA: FBgn0031264, mRNA: FBgn0031264	FBpp0304618:c.[758T>C]; FBpp0311648:c.[758T>C]; FBpp0077736:c.[758T>C]; FBpp0304619:c.[758T>C]	FBpp0304618:p.[Leu253Pro]; FBpp0311648:p.[Leu253Pro]; FBpp0077736:p.[Leu253Pro]; FBpp0304619:p.[Leu253Pro]
2L mapping	562444	SNV	1	C	A	12	100	34.5833	CDS: FBgn0031264, CDS: FBgn0031264, CDS: FBgn0031264, CDS: FBgn0031264, Exon: Exon, Exon: Exon, Gene: FBgn0031264, Misc. feature: contig 2L_1_12 1..50000(1), mRNA: FBgn0031264, mRNA: FBgn0031264, mRNA: FBgn0031264, mRNA: FBgn0031264	FBpp0304619:c.[738G>T]; FBpp0077736:c.[738G>T]; FBpp0304618:c.[738G>T]; FBpp0311648:c.[738G>T]
2L mapping	562553	SNV	1	C	A	19	100	32.8421	CDS: FBgn0031264, CDS: FBgn0031264, CDS: FBgn0031264, CDS: FBgn0031264, Exon: Exon, Exon: Exon, Gene: FBgn0031264, Misc. feature: contig 2L_1_12 1..50000(1), mRNA: FBgn0031264, mRNA: FBgn0031264, mRNA: FBgn0031264, mRNA: FBgn0031264	FBpp0311648:c.[629G>T]; FBpp0304618:c.[629G>T]; FBpp0304619:c.[629G>T]; FBpp0077736:c.[629G>T]	FBpp0311648:p.[Gly210Val]; FBpp0304618:p.[Gly210Val]; FBpp0304619:p.[Gly210Val]; FBpp0077736:p.[Gly210Val]
2L mapping	562600	SNV	1	T	G	15	100	35.2	CDS: FBgn0031264, CDS: FBgn0031264, CDS: FBgn0031264, CDS: FBgn0031264, Exon: Exon, Exon: Exon, Gene: FBgn0031264, Misc. feature: contig 2L_1_12 1..50000(1), mRNA: FBgn0031264, mRNA: FBgn0031264, mRNA: FBgn0031264, mRNA: FBgn0031264	FBpp0311648:c.[582A>C]; FBpp0304618:c.[582A>C]; FBpp0077736:c.[582A>C]; FBpp0304619:c.[582A>C]
2L mapping	562602	MNV	2	TC	AT	15	100	34.9667	CDS: FBgn0031264, CDS: FBgn0031264, CDS: FBgn0031264, CDS: FBgn0031264, Exon: Exon, Exon: Exon, Gene: FBgn0031264, Misc. feature: contig 2L_1_12 1..50000(1), mRNA: FBgn0031264, mRNA: FBgn0031264, mRNA: FBgn0031264, mRNA: FBgn0031264	FBpp0304618:c.[579_580delGAinsAT]; FBpp0077736:c.[579_580delGAinsAT]; FBpp0311648:c.[579_580delGAinsAT]; FBpp0304619:c.[579_580delGAinsAT]	FBpp0304618:p.[Thr194Ser]; FBpp0077736:p.[Thr194Ser]; FBpp0311648:p.[Thr194Ser]; FBpp0304619:p.[Thr194Ser]
2L mapping	562607	SNV	1	G	A	16	100	36.25	CDS: FBgn0031264, CDS: FBgn0031264, CDS: FBgn0031264, CDS: FBgn0031264, Exon: Exon, Exon: Exon, Gene: FBgn0031264, Misc. feature: contig 2L_1_12 1..50000(1), mRNA: FBgn0031264, mRNA: FBgn0031264, mRNA: FBgn0031264, mRNA: FBgn0031264	FBpp0311648:c.[575C>T]; FBpp0304619:c.[575C>T]; FBpp0304618:c.[575C>T]; FBpp0077736:c.[575C>T]	FBpp0311648:p.[Pro192Leu]; FBpp0304619:p.[Pro192Leu]; FBpp0304618:p.[Pro192Leu]; FBpp0077736:p.[Pro192Leu]
2L mapping	562616	SNV	1	G	C	20	100	36.1	CDS: FBgn0031264, CDS: FBgn0031264, CDS: FBgn0031264, CDS: FBgn0031264, Exon: Exon, Exon: Exon, Gene: FBgn0031264, Misc. feature: contig 2L_1_12 1..50000(1), mRNA: FBgn0031264, mRNA: FBgn0031264, mRNA: FBgn0031264, mRNA: FBgn0031264	FBpp0304618:c.[566C>G]; FBpp0311648:c.[566C>G]; FBpp0077736:c.[566C>G]; FBpp0304619:c.[566C>G]	FBpp0304618:p.[Ala189Gly]; FBpp0311648:p.[Ala189Gly]; FBpp0077736:p.[Ala189Gly]; FBpp0304619:p.[Ala189Gly]
2L mapping	562662	SNV	1	T	C	22	95.4545	35.5238	CDS: FBgn0031264, CDS: FBgn0031264, CDS: FBgn0031264, CDS: FBgn0031264, Exon: Exon, Exon: Exon, Gene: FBgn0031264, Misc. feature: contig 2L_1_12 1..50000(1), mRNA: FBgn0031264, mRNA: FBgn0031264, mRNA: FBgn0031264, mRNA: FBgn0031264	FBpp0304619:c.[520A>G]; FBpp0311648:c.[520A>G]; FBpp0304618:c.[520A>G]; FBpp0077736:c.[520A>G]	FBpp0304619:p.[Lys174Glu]; FBpp0311648:p.[Lys174Glu]; FBpp0304618:p.[Lys174Glu]; FBpp0077736:p.[Lys174Glu]
2L mapping	562665	MNV	2	CT	GC	21	85.7143	34.3611	CDS: FBgn0031264, CDS: FBgn0031264, CDS: FBgn0031264, CDS: FBgn0031264, Exon: Exon, Exon: Exon, Gene: FBgn0031264, Misc. feature: contig 2L_1_12 1..50000(1), mRNA: FBgn0031264, mRNA: FBgn0031264, mRNA: FBgn0031264, mRNA: FBgn0031264	FBpp0304619:c.[516_517delAGinsGC]; FBpp0304618:c.[516_517delAGinsGC]; FBpp0311648:c.[516_517delAGinsGC]; FBpp0077736:c.[516_517delAGinsGC]	FBpp0304619:p.[Ala173Pro]; FBpp0304618:p.[Ala173Pro]; FBpp0311648:p.[Ala173Pro]; FBpp0077736:p.[Ala173Pro]
2L mapping	562738	SNV	1	A	G	21	100	29.8095	CDS: FBgn0031264, CDS: FBgn0031264, CDS: FBgn0031264, CDS: FBgn0031264, Exon: Exon, Exon: Exon, Gene: FBgn0031264, Misc. feature: contig 2L_1_12 1..50000(1), mRNA: FBgn0031264, mRNA: FBgn0031264, mRNA: FBgn0031264, mRNA: FBgn0031264	FBpp0304619:c.[444T>C]; FBpp0304618:c.[444T>C]; FBpp0311648:c.[444T>C]; FBpp0077736:c.[444T>C]
2L mapping	562744	SNV	1	A	C	21	100	35.1905	CDS: FBgn0031264, CDS: FBgn0031264, CDS: FBgn0031264, CDS: FBgn0031264, Exon: Exon, Exon: Exon, Gene: FBgn0031264, Misc. feature: contig 2L_1_12 1..50000(1), mRNA: FBgn0031264, mRNA: FBgn0031264, mRNA: FBgn0031264, mRNA: FBgn0031264	FBpp0304618:c.[438T>G]; FBpp0311648:c.[438T>G]; FBpp0304619:c.[438T>G]; FBpp0077736:c.[438T>G]
2L mapping	562762	SNV	1	G	A	22	100	35.3636	CDS: FBgn0031264, CDS: FBgn0031264, CDS: FBgn0031264, CDS: FBgn0031264, Exon: Exon, Exon: Exon, Gene: FBgn0031264, Misc. feature: contig 2L_1_12 1..50000(1), mRNA: FBgn0031264, mRNA: FBgn0031264, mRNA: FBgn0031264, mRNA: FBgn0031264	FBpp0311648:c.[420C>T]; FBpp0304619:c.[420C>T]; FBpp0304618:c.[420C>T]; FBpp0077736:c.[420C>T]
2L mapping	562780	SNV	1	G	A	18	100	31	CDS: FBgn0031264, CDS: FBgn0031264, CDS: FBgn0031264, CDS: FBgn0031264, Exon: Exon, Exon: Exon, Gene: FBgn0031264, Misc. feature: contig 2L_1_12 1..50000(1), mRNA: FBgn0031264, mRNA: FBgn0031264, mRNA: FBgn0031264, mRNA: FBgn0031264	FBpp0077736:c.[402C>T]; FBpp0304618:c.[402C>T]; FBpp0304619:c.[402C>T]; FBpp0311648:c.[402C>T]
2L mapping	562782	SNV	1	G	C	18	100	33.7222	CDS: FBgn0031264, CDS: FBgn0031264, CDS: FBgn0031264, CDS: FBgn0031264, Exon: Exon, Exon: Exon, Gene: FBgn0031264, Misc. feature: contig 2L_1_12 1..50000(1), mRNA: FBgn0031264, mRNA: FBgn0031264, mRNA: FBgn0031264, mRNA: FBgn0031264	FBpp0304618:c.[400C>G]; FBpp0311648:c.[400C>G]; FBpp0304619:c.[400C>G]; FBpp0077736:c.[400C>G]	FBpp0304618:p.[Leu134Val]; FBpp0311648:p.[Leu134Val]; FBpp0304619:p.[Leu134Val]; FBpp0077736:p.[Leu134Val]
2L mapping	562807	SNV	1	C	T	18	100	31.9444	CDS: FBgn0031264, CDS: FBgn0031264, CDS: FBgn0031264, CDS: FBgn0031264, Exon: Exon, Exon: Exon, Gene: FBgn0031264, Misc. feature: contig 2L_1_12 1..50000(1), mRNA: FBgn0031264, mRNA: FBgn0031264, mRNA: FBgn0031264, mRNA: FBgn0031264	FBpp0077736:c.[375G>A]; FBpp0311648:c.[375G>A]; FBpp0304618:c.[375G>A]; FBpp0304619:c.[375G>A]
2L mapping	562813	SNV	1	T	C	17	100	36.4118	CDS: FBgn0031264, CDS: FBgn0031264, CDS: FBgn0031264, CDS: FBgn0031264, Exon: Exon, Exon: Exon, Gene: FBgn0031264, Misc. feature: contig 2L_1_12 1..50000(1), mRNA: FBgn0031264, mRNA: FBgn0031264, mRNA: FBgn0031264, mRNA: FBgn0031264	FBpp0304619:c.[369A>G]; FBpp0304618:c.[369A>G]; FBpp0311648:c.[369A>G]; FBpp0077736:c.[369A>G]
2L mapping	562885	SNV	1	G	C	24	100	35.5	CDS: FBgn0031264, CDS: FBgn0031264, CDS: FBgn0031264, CDS: FBgn0031264, Exon: Exon, Exon: Exon, Gene: FBgn0031264, Misc. feature: contig 2L_1_12 1..50000(1), mRNA: FBgn0031264, mRNA: FBgn0031264, mRNA: FBgn0031264, mRNA: FBgn0031264	FBpp0304618:c.[297C>G]; FBpp0077736:c.[297C>G]; FBpp0304619:c.[297C>G]; FBpp0311648:c.[297C>G]
2L mapping	562984	SNV	1	C	T	18	100	36.2222	CDS: FBgn0031264, CDS: FBgn0031264, CDS: FBgn0031264, CDS: FBgn0031264, Exon: Exon, Exon: Exon, Gene: FBgn0031264, Misc. feature: contig 2L_1_12 1..50000(1), mRNA: FBgn0031264, mRNA: FBgn0031264, mRNA: FBgn0031264, mRNA: FBgn0031264	FBpp0304619:c.[198G>A]; FBpp0304618:c.[198G>A]; FBpp0311648:c.[198G>A]; FBpp0077736:c.[198G>A]
2L mapping	563771	SNV	1	T	G	29	100	35.1724	Exon: Exon, Gene: FBgn0031264, Misc. feature: contig 2L_1_12 1..50000(1), mRNA: FBgn0031264
2L mapping	564385	SNV	1	G	A	23	100	35.0435	CDS: FBgn0031265, Exon: Exon, Gene: FBgn0031265, Misc. feature: contig 2L_1_12 1..50000(1), mRNA: FBgn0031265	FBpp0077727:c.159G>A
2L mapping	564704	SNV	1	G	A	15	100	34.5333	CDS: FBgn0031265, Exon: Exon, Gene: FBgn0031265, Misc. feature: contig 2L_1_12 1..50000(1), mRNA: FBgn0031265	FBpp0077727:c.478G>A	FBpp0077727:p.Glu160Lys
2L mapping	564707	SNV	1	T	A	15	100	31	CDS: FBgn0031265, Exon: Exon, Gene: FBgn0031265, Misc. feature: contig 2L_1_12 1..50000(1), mRNA: FBgn0031265	FBpp0077727:c.481T>A	FBpp0077727:p.Ser161Thr
2L mapping	564710	SNV	1	A	C	15	100	36.2	CDS: FBgn0031265, Exon: Exon, Gene: FBgn0031265, Misc. feature: contig 2L_1_12 1..50000(1), mRNA: FBgn0031265	FBpp0077727:c.484A>C	FBpp0077727:p.Met162Leu
2L mapping	564724	SNV	1	A	C	13	100	33.8462	CDS: FBgn0031265, Exon: Exon, Gene: FBgn0031265, Misc. feature: contig 2L_1_12 1..50000(1), mRNA: FBgn0031265	FBpp0077727:c.498A>C
2L mapping	564787	SNV	1	A	G	18	100	32.3333	CDS: FBgn0031265, Exon: Exon, Gene: FBgn0031265, Misc. feature: contig 2L_1_12 1..50000(1), mRNA: FBgn0031265	FBpp0077727:c.561A>G
2L mapping	565825	SNV	1	G	A	25	100	35.12	CDS: FBgn0031265, Exon: Exon, Gene: FBgn0031265, Misc. feature: contig 2L_1_12 1..50000(1), mRNA: FBgn0031265	FBpp0077727:c.1599G>A
2L mapping	566631	SNV	1	A	G	14	100	35	Gene: FBgn0021874, Misc. feature: contig 2L_1_12 1..50000(1)	FBpp0077735:c.1328-7T>C
2L mapping	566867	SNV	1	G	A	27	100	34.5556	CDS: FBgn0021874, Exon: Exon, Gene: FBgn0021874, Misc. feature: contig 2L_1_12 1..50000(1), mRNA: FBgn0021874	FBpp0077735:c.1140C>T
2L mapping	567156	SNV	1	G	A	28	100	33.6429	CDS: FBgn0021874, Exon: Exon, Gene: FBgn0021874, Misc. feature: contig 2L_1_12 1..50000(1), mRNA: FBgn0021874	FBpp0077735:c.909C>T
2L mapping	567351	SNV	1	C	T	29	96.5517	30.8929	CDS: FBgn0021874, Exon: Exon, Gene: FBgn0021874, Misc. feature: contig 2L_1_12 1..50000(1), mRNA: FBgn0021874	FBpp0077735:c.714G>A
2L mapping	567468	SNV	1	G	T	23	95.6522	33.9091	CDS: FBgn0021874, Exon: Exon, Gene: FBgn0021874, Misc. feature: contig 2L_1_12 1..50000(1), mRNA: FBgn0021874	FBpp0077735:c.597C>A
2L mapping	567915	SNV	1	A	T	23	100	32.3478	CDS: FBgn0021874, Exon: Exon, Gene: FBgn0021874, Misc. feature: contig 2L_1_12 1..50000(1), mRNA: FBgn0021874	FBpp0077735:c.150T>A
2L mapping	567963	SNV	1	C	G	21	100	32.5714	CDS: FBgn0021874, Exon: Exon, Gene: FBgn0021874, Misc. feature: contig 2L_1_12 1..50000(1), mRNA: FBgn0021874	FBpp0077735:c.102G>C
2L mapping	568126	SNV	1	G	A	27	100	33.1852	Misc. feature: contig 2L_1_12 1..50000(1)
2L mapping	568147	SNV	1	C	T	25	100	33.32	Misc. feature: contig 2L_1_12 1..50000(1)
2L mapping	568161	Insertion	2	-	TT	19	42.1053	36.75	Misc. feature: contig 2L_1_12 1..50000(1)
2L mapping	568288	SNV	1	C	A	25	96	36.375	Misc. feature: contig 2L_1_12 1..50000(1)
2L mapping	568299	SNV	1	C	G	29	100	35.3793	Misc. feature: contig 2L_1_12 1..50000(1)
2L mapping	568304	SNV	1	A	G	29	100	33.8621	Misc. feature: contig 2L_1_12 1..50000(1)
2L mapping	568334	SNV	1	A	T	31	96.7742	33.7	Misc. feature: contig 2L_1_12 1..50000(1)
2L mapping	568456	SNV	1	G	A	25	96	33.4583	Gene: FBgn0031266, Misc. feature: contig 2L_1_12 1..50000(1)	FBpp0077728:c.[28+23G>A]; FBpp0304617:c.[28+23G>A]
2L mapping	568496	SNV	1	C	A	23	100	34.4783	Gene: FBgn0031266, Misc. feature: contig 2L_1_12 1..50000(1)	FBpp0304617:c.[28+63C>A]; FBpp0077728:c.[28+63C>A]
2L mapping	568507	SNV	1	A	C	23	100	35.6522	Gene: FBgn0031266, Misc. feature: contig 2L_1_12 1..50000(1)	FBpp0077728:c.[28+74A>C]; FBpp0304617:c.[28+74A>C]
2L mapping	568514	SNV	1	C	A	27	100	35.963	Gene: FBgn0031266, Misc. feature: contig 2L_1_12 1..50000(1)	FBpp0077728:c.[28+81C>A]; FBpp0304617:c.[28+81C>A]
2L mapping	568643	SNV	1	T	C	26	100	34.8846	CDS: FBgn0031266, CDS: FBgn0031266, Exon: Exon, Gene: FBgn0031266, Misc. feature: contig 2L_1_12 1..50000(1), mRNA: FBgn0031266, mRNA: FBgn0031266	FBpp0304617:c.[73T>C]; FBpp0077728:c.[73T>C]
2L mapping	568747	SNV	1	T	C	28	100	33.75	CDS: FBgn0031266, CDS: FBgn0031266, Exon: Exon, Gene: FBgn0031266, Misc. feature: contig 2L_1_12 1..50000(1), mRNA: FBgn0031266, mRNA: FBgn0031266	FBpp0077728:c.[177T>C]; FBpp0304617:c.[177T>C]
2L mapping	568867	SNV	1	A	G	20	100	35.35	CDS: FBgn0031266, CDS: FBgn0031266, Exon: Exon, Gene: FBgn0031266, Misc. feature: contig 2L_1_12 1..50000(1), mRNA: FBgn0031266, mRNA: FBgn0031266	FBpp0077728:c.[297A>G]; FBpp0304617:c.[297A>G]
2L mapping	568921	SNV	1	T	A	24	100	32.625	CDS: FBgn0031266, CDS: FBgn0031266, Exon: Exon, Gene: FBgn0031266, Misc. feature: contig 2L_1_12 1..50000(1), mRNA: FBgn0031266, mRNA: FBgn0031266	FBpp0304617:c.[351T>A]; FBpp0077728:c.[351T>A]
2L mapping	569086	SNV	1	T	A	24	100	35.125	CDS: FBgn0031266, CDS: FBgn0031266, Exon: Exon, Gene: FBgn0031266, Misc. feature: contig 2L_1_12 1..50000(1), mRNA: FBgn0031266, mRNA: FBgn0031266	FBpp0304617:c.[516T>A]; FBpp0077728:c.[516T>A]
2L mapping	569300	SNV	1	C	G	27	100	33.4074	Gene: FBgn0031266, Misc. feature: contig 2L_1_12 1..50000(1)	FBpp0077728:c.[720+10C>G]; FBpp0304617:c.[720+10C>G]
2L mapping	569989	SNV	1	C	A	31	100	32.4839	CDS: FBgn0031266, CDS: FBgn0031266, Exon: Exon, Exon: Exon, Gene: FBgn0031266, Misc. feature: contig 2L_1_12 1..50000(1), mRNA: FBgn0031266, mRNA: FBgn0031266	FBpp0077728:c.[1362C>A]; FBpp0304617:c.[1362C>A]
2L mapping	570181	SNV	1	G	A	20	100	36.6	CDS: FBgn0031266, CDS: FBgn0031266, Exon: Exon, Exon: Exon, Gene: FBgn0031266, Misc. feature: contig 2L_1_12 1..50000(1), mRNA: FBgn0031266, mRNA: FBgn0031266	FBpp0304617:c.[1554G>A]; FBpp0077728:c.[1554G>A]
2L mapping	570331	SNV	1	T	C	27	100	33.3333	CDS: FBgn0031266, CDS: FBgn0031266, Exon: Exon, Exon: Exon, Gene: FBgn0031266, Misc. feature: contig 2L_1_12 1..50000(1), mRNA: FBgn0031266, mRNA: FBgn0031266	FBpp0077728:c.[1704T>C]; FBpp0304617:c.[1704T>C]
2L mapping	570439	SNV	1	G	A	21	100	35.0476	CDS: FBgn0031266, CDS: FBgn0031266, Exon: Exon, Exon: Exon, Gene: FBgn0031266, Misc. feature: contig 2L_1_12 1..50000(1), mRNA: FBgn0031266, mRNA: FBgn0031266	FBpp0304617:c.[1812G>A]; FBpp0077728:c.[1812G>A]
2L mapping	573707	SNV	1	C	T	24	100	35.875	CDS: FBgn0031267, Exon: Exon, Gene: FBgn0031267, Misc. feature: contig 2L_1_12 1..50000(1), mRNA: FBgn0031267	FBpp0077734:c.429G>A	FBpp0077734:p.Met143Ile
2L mapping	573764	SNV	1	A	G	23	100	36.0435	CDS: FBgn0031267, Exon: Exon, Gene: FBgn0031267, Misc. feature: contig 2L_1_12 1..50000(1), mRNA: FBgn0031267	FBpp0077734:c.372T>C
2L mapping	574994	SNV	1	G	A	15	100	33.3333	CDS: FBgn0031268, CDS: FBgn0031268, Exon: Exon, Gene: FBgn0031268, Misc. feature: contig 2L_1_12 1..50000(1), mRNA: FBgn0031268, mRNA: FBgn0031268	FBpp0077729:c.[273G>A]; FBpp0301725:c.[273G>A]
2L mapping	576524	SNV	1	A	C	24	100	32.75	CDS: FBgn0013323, Exon: Exon, Exon: Exon, Exon: Exon, Gene: FBgn0013323, Misc. feature: contig 2L_1_12 1..50000(1), mRNA: FBgn0013323, mRNA: FBgn0013323, mRNA: FBgn0013323	FBpp0312235:c.77T>G	FBpp0312235:p.Met26Arg
2L mapping	579410	SNV	1	A	G	23	100	35.087	Exon: Exon, Gene: FBgn0023489, Misc. feature: contig 2L_1_12 1..50000(1), mRNA: FBgn0023489
2L mapping	579478	SNV	1	T	C	28	100	35.3929	Exon: Exon, Gene: FBgn0023489, Misc. feature: contig 2L_1_12 1..50000(1), mRNA: FBgn0023489
2L mapping	579533	SNV	1	G	T	26	100	34.8462	Exon: Exon, Gene: FBgn0023489, Misc. feature: contig 2L_1_12 1..50000(1), mRNA: FBgn0023489
2L mapping	579566	SNV	1	T	C	28	100	34.5714	Misc. feature: contig 2L_1_12 1..50000(1)
2L mapping	579640	SNV	1	C	T	20	100	32.95	Misc. feature: contig 2L_1_12 1..50000(1)
2L mapping	580522	SNV	1	A	G	17	100	36.5294	Misc. feature: contig 2L_1_12 1..50000(1)
2L mapping	582571	SNV	1	G	A	23	100	35.3043	Misc. feature: contig 2L_1_12 1..50000(1)
2L mapping	584229	SNV	1	G	C	27	100	35.4444	CDS: FBgn0010323, CDS: FBgn0010323, Exon: Exon, Gene: FBgn0010323, Misc. feature: contig 2L_1_12 1..50000(1), mRNA: FBgn0010323, mRNA: FBgn0010323	FBpp0309909:c.[1198C>G]; FBpp0309910:c.[1372C>G]	FBpp0309909:p.[Pro400Ala]; FBpp0309910:p.[Pro458Ala]
2L mapping	584236	SNV	1	C	T	26	100	36.1538	CDS: FBgn0010323, CDS: FBgn0010323, Exon: Exon, Gene: FBgn0010323, Misc. feature: contig 2L_1_12 1..50000(1), mRNA: FBgn0010323, mRNA: FBgn0010323	FBpp0309909:c.[1191G>A]; FBpp0309910:c.[1365G>A]
2L mapping	584450	Deletion	1	A	-	27	96.2963	30.8077	Gene: FBgn0010323, Misc. feature: contig 2L_1_12 1..50000(1)	FBpp0309910:c.[1156-5delT]; FBpp0309909:c.[982-5delT]
2L mapping	584470	SNV	1	G	A	28	100	34.25	Gene: FBgn0010323, Misc. feature: contig 2L_1_12 1..50000(1)	FBpp0309910:c.[1156-25C>T]; FBpp0309909:c.[982-25C>T]
2L mapping	584478	SNV	1	T	C	22	100	36.6364	Gene: FBgn0010323, Misc. feature: contig 2L_1_12 1..50000(1)	FBpp0309910:c.[1156-33A>G]; FBpp0309909:c.[982-33A>G]
2L mapping	584493	SNV	1	T	C	23	100	33.3913	Gene: FBgn0010323, Misc. feature: contig 2L_1_12 1..50000(1)	FBpp0309910:c.[1156-48A>G]; FBpp0309909:c.[982-48A>G]
2L mapping	584547	Deletion	1	C	-	14	100	34.7143	Gene: FBgn0010323, Misc. feature: contig 2L_1_12 1..50000(1)	FBpp0309910:c.[1156-102delG]; FBpp0309909:c.[982-102delG]
2L mapping	584549	Deletion	3	ACT	-	14	100	35.4286	Gene: FBgn0010323, Misc. feature: contig 2L_1_12 1..50000(1)	FBpp0309910:c.[1156-106_1156-104delAGT]; FBpp0309909:c.[982-106_982-104delAGT]
2L mapping	584554	Deletion	3	TGA	-	14	100	35.6429	Gene: FBgn0010323, Misc. feature: contig 2L_1_12 1..50000(1)	FBpp0309909:c.[982-111_982-109delTCA]; FBpp0309910:c.[1156-111_1156-109delTCA]
2L mapping	584593	SNV	1	A	T	23	100	34.8261	Gene: FBgn0010323, Misc. feature: contig 2L_1_12 1..50000(1)	FBpp0309910:c.[1156-148T>A]; FBpp0309909:c.[982-148T>A]
2L mapping	584617	SNV	1	G	A	24	95.8333	35.0435	Gene: FBgn0010323, Misc. feature: contig 2L_1_12 1..50000(1)	FBpp0309910:c.[1156-172C>T]; FBpp0309909:c.[982-172C>T]
2L mapping	584622	SNV	1	T	C	22	100	30.9545	Gene: FBgn0010323, Misc. feature: contig 2L_1_12 1..50000(1)	FBpp0309910:c.[1156-177A>G]; FBpp0309909:c.[982-177A>G]
2L mapping	584624	SNV	1	T	G	22	100	35.7273	Gene: FBgn0010323, Misc. feature: contig 2L_1_12 1..50000(1)	FBpp0309909:c.[982-179A>C]; FBpp0309910:c.[1156-179A>C]
2L mapping	584626	SNV	1	T	C	22	100	33.1818	Gene: FBgn0010323, Misc. feature: contig 2L_1_12 1..50000(1)	FBpp0309910:c.[1156-181A>G]; FBpp0309909:c.[982-181A>G]
2L mapping	584683	Deletion	3	TGC	-	15	46.6667	36.4286	Gene: FBgn0010323, Misc. feature: contig 2L_1_12 1..50000(1)	FBpp0309909:c.[982-240_982-238delGCA]; FBpp0309910:c.[1156-240_1156-238delGCA]
2L mapping	584761	Insertion	1	-	T	24	95.8333	34.087	Gene: FBgn0010323, Misc. feature: contig 2L_1_12 1..50000(1)	FBpp0309910:c.[1156-316_1156-315insA]; FBpp0309909:c.[982-316_982-315insA]
2L mapping	584783	SNV	1	A	T	32	100	34.375	Gene: FBgn0010323, Misc. feature: contig 2L_1_12 1..50000(1)	FBpp0309910:c.[1156-338T>A]; FBpp0309909:c.[982-338T>A]
2L mapping	584922	SNV	1	A	G	36	100	33.9722	Gene: FBgn0010323, Misc. feature: contig 2L_1_12 1..50000(1)	FBpp0309910:c.[1156-477T>C]; FBpp0309909:c.[982-477T>C]
2L mapping	585284	SNV	1	T	G	28	100	35.2143	Gene: FBgn0010323, Misc. feature: contig 2L_1_12 1..50000(1)	FBpp0309909:c.[982-839A>C]; FBpp0309910:c.[1156-839A>C]
2L mapping	587013	SNV	1	G	C	22	100	34.8636	Gene: FBgn0010323, Misc. feature: contig 2L_1_12 1..50000(1)	FBpp0309910:c.[1156-2568C>G]; FBpp0309909:c.[982-2568C>G]
2L mapping	587301	MNV	2	AC	CT	17	100	35.8529	Gene: FBgn0010323, Misc. feature: contig 2L_1_12 1..50000(1)	FBpp0309909:c.[982-2857_982-2856delGTinsAG]; FBpp0309910:c.[1156-2857_1156-2856delGTinsAG]
2L mapping	587667	SNV	1	T	G	10	100	32.3	Gene: FBgn0010323, Misc. feature: contig 2L_1_12 1..50000(1)	FBpp0309910:c.[1156-3222A>C]; FBpp0309909:c.[982-3222A>C]
2L mapping	587906	SNV	1	C	T	19	100	35.5789	Gene: FBgn0010323, Misc. feature: contig 2L_1_12 1..50000(1)	FBpp0309910:c.[1156-3461G>A]; FBpp0309909:c.[982-3461G>A]
2L mapping	588273	SNV	1	A	T	17	100	35.5882	Gene: FBgn0010323, Misc. feature: contig 2L_1_12 1..50000(1)	FBpp0309909:c.[982-3828T>A]; FBpp0309910:c.[1156-3828T>A]
2L mapping	588289	SNV	1	C	T	21	100	34.1429	Gene: FBgn0010323, Misc. feature: contig 2L_1_12 1..50000(1)	FBpp0309909:c.[982-3844G>A]; FBpp0309910:c.[1156-3844G>A]
2L mapping	588313	SNV	1	C	A	23	100	33.9565	Gene: FBgn0010323, Misc. feature: contig 2L_1_12 1..50000(1)	FBpp0309909:c.[982-3868G>T]; FBpp0309910:c.[1156-3868G>T]
2L mapping	588357	SNV	1	A	T	38	97.3684	34	Gene: FBgn0010323, Misc. feature: contig 2L_1_12 1..50000(1)	FBpp0309910:c.[1156-3912T>A]; FBpp0309909:c.[982-3912T>A]
2L mapping	588367	MNV	3	AAA	TGT	33	100	34.8283	Gene: FBgn0010323, Misc. feature: contig 2L_1_12 1..50000(1)	FBpp0309910:c.[1155+3903_1155+3905delTTTinsACA]; FBpp0309909:c.[981+3903_981+3905delTTTinsACA]
2L mapping	588397	SNV	1	G	C	30	100	35.9333	Gene: FBgn0010323, Misc. feature: contig 2L_1_12 1..50000(1)	FBpp0309909:c.[981+3875C>G]; FBpp0309910:c.[1155+3875C>G]
2L mapping	588399	SNV	1	G	A	30	100	36.6	Gene: FBgn0010323, Misc. feature: contig 2L_1_12 1..50000(1)	FBpp0309910:c.[1155+3873C>T]; FBpp0309909:c.[981+3873C>T]
2L mapping	588413	SNV	1	T	C	31	100	33.1935	Gene: FBgn0010323, Misc. feature: contig 2L_1_12 1..50000(1)	FBpp0309910:c.[1155+3859A>G]; FBpp0309909:c.[981+3859A>G]
2L mapping	588419	SNV	1	T	A	24	100	35.0417	Gene: FBgn0010323, Misc. feature: contig 2L_1_12 1..50000(1)	FBpp0309909:c.[981+3853A>T]; FBpp0309910:c.[1155+3853A>T]
2L mapping	588428	SNV	1	T	A	24	100	36.5	Gene: FBgn0010323, Misc. feature: contig 2L_1_12 1..50000(1)	FBpp0309910:c.[1155+3844A>T]; FBpp0309909:c.[981+3844A>T]
2L mapping	588455	SNV	1	G	A	16	100	36.5	Gene: FBgn0010323, Misc. feature: contig 2L_1_12 1..50000(1)	FBpp0309909:c.[981+3817C>T]; FBpp0309910:c.[1155+3817C>T]
2L mapping	588475	SNV	1	A	G	23	100	36.4783	Gene: FBgn0010323, Misc. feature: contig 2L_1_12 1..50000(1)	FBpp0309910:c.[1155+3797T>C]; FBpp0309909:c.[981+3797T>C]
2L mapping	588489	SNV	1	A	G	22	100	36.0909	Gene: FBgn0010323, Misc. feature: contig 2L_1_12 1..50000(1)	FBpp0309910:c.[1155+3783T>C]; FBpp0309909:c.[981+3783T>C]
2L mapping	588502	SNV	1	C	G	24	100	33.5417	Gene: FBgn0010323, Misc. feature: contig 2L_1_12 1..50000(1)	FBpp0309910:c.[1155+3770G>C]; FBpp0309909:c.[981+3770G>C]
2L mapping	588516	SNV	1	C	T	27	85.1852	36.8261	Gene: FBgn0010323, Misc. feature: contig 2L_1_12 1..50000(1)	FBpp0309910:c.[1155+3756G>A]; FBpp0309909:c.[981+3756G>A]
2L mapping	588522	Insertion	2	-	TG	27	70.3704	36.2105	Gene: FBgn0010323, Misc. feature: contig 2L_1_12 1..50000(1)	FBpp0309909:c.[981+3750_981+3751insCA]; FBpp0309910:c.[1155+3750_1155+3751insCA]
2L mapping	588535	SNV	1	T	C	32	100	34.2188	Gene: FBgn0010323, Misc. feature: contig 2L_1_12 1..50000(1)	FBpp0309910:c.[1155+3737A>G]; FBpp0309909:c.[981+3737A>G]
2L mapping	588543	MNV	2	TG	GT	35	91.4286	35.8594	Gene: FBgn0010323, Misc. feature: contig 2L_1_12 1..50000(1)	FBpp0309909:c.[981+3728_981+3729delCAinsAC]; FBpp0309910:c.[1155+3728_1155+3729delCAinsAC]
2L mapping	588583	SNV	1	T	C	29	100	34.5862	Gene: FBgn0010323, Misc. feature: contig 2L_1_12 1..50000(1)	FBpp0309910:c.[1155+3689A>G]; FBpp0309909:c.[981+3689A>G]
2L mapping	588591	Deletion	8	CATATAAA	-	27	74.0741	32.15	Gene: FBgn0010323, Misc. feature: contig 2L_1_12 1..50000(1)	FBpp0309909:c.[981+3674_981+3681delTTTATATG]; FBpp0309910:c.[1155+3674_1155+3681delTTTATATG]
2L mapping	588635	Deletion	1	T	-	34	88.2353	34.3667	Gene: FBgn0010323, Misc. feature: contig 2L_1_12 1..50000(1)	FBpp0309909:c.[981+3637delA]; FBpp0309910:c.[1155+3637delA]
2L mapping	588688	SNV	1	G	A	36	100	33.75	Gene: FBgn0010323, Misc. feature: contig 2L_1_12 1..50000(1)	FBpp0309910:c.[1155+3584C>T]; FBpp0309909:c.[981+3584C>T]
2L mapping	588747	SNV	1	T	C	35	97.1429	32.6176	Gene: FBgn0010323, Misc. feature: contig 2L_1_12 1..50000(1)	FBpp0309910:c.[1155+3525A>G]; FBpp0309909:c.[981+3525A>G]
2L mapping	589417	Deletion	1	G	-	15	66.6667	29.1	Gene: FBgn0010323, Misc. feature: contig 2L_1_12 1..50000(1)	FBpp0309909:c.[981+2855delC]; FBpp0309910:c.[1155+2855delC]
2L mapping	589489	SNV	1	A	G	27	100	34.4815	Gene: FBgn0010323, Misc. feature: contig 2L_1_12 1..50000(1)	FBpp0309910:c.[1155+2783T>C]; FBpp0309909:c.[981+2783T>C]
2L mapping	589496	SNV	1	G	A	27	100	35.4074	Gene: FBgn0010323, Misc. feature: contig 2L_1_12 1..50000(1)	FBpp0309909:c.[981+2776C>T]; FBpp0309910:c.[1155+2776C>T]
2L mapping	589522	SNV	1	A	G	21	100	35.2857	Gene: FBgn0010323, Misc. feature: contig 2L_1_12 1..50000(1)	FBpp0309909:c.[981+2750T>C]; FBpp0309910:c.[1155+2750T>C]
2L mapping	589533	SNV	1	G	A	23	100	32.6957	Gene: FBgn0010323, Misc. feature: contig 2L_1_12 1..50000(1)	FBpp0309910:c.[1155+2739C>T]; FBpp0309909:c.[981+2739C>T]
2L mapping	589660	SNV	1	G	A	28	100	35.5714	Gene: FBgn0010323, Misc. feature: contig 2L_1_12 1..50000(1)	FBpp0309909:c.[981+2612C>T]; FBpp0309910:c.[1155+2612C>T]
2L mapping	590002	SNV	1	G	C	29	100	36.7241	Gene: FBgn0010323, Misc. feature: contig 2L_1_12 1..50000(1)	FBpp0309909:c.[981+2270C>G]; FBpp0309910:c.[1155+2270C>G]
2L mapping	592082	SNV	1	C	G	25	100	35.36	Gene: FBgn0010323, Misc. feature: contig 2L_1_12 1..50000(1)	FBpp0309909:c.[981+190G>C]; FBpp0309910:c.[1155+190G>C]
2L mapping	592218	SNV	1	T	C	25	100	31.92	Gene: FBgn0010323, Misc. feature: contig 2L_1_12 1..50000(1)	FBpp0309909:c.[981+54A>G]; FBpp0309910:c.[1155+54A>G]
2L mapping	592386	SNV	1	G	A	15	100	35.2	CDS: FBgn0010323, CDS: FBgn0010323, Exon: Exon, Gene: FBgn0010323, Misc. feature: contig 2L_1_12 1..50000(1), mRNA: FBgn0010323, mRNA: FBgn0010323	FBpp0309910:c.[1041C>T]; FBpp0309909:c.[867C>T]
2L mapping	592775	SNV	1	C	A	30	100	35.5333	Gene: FBgn0010323, Misc. feature: contig 2L_1_12 1..50000(1)	FBpp0309910:c.[794-142G>T]; FBpp0309909:c.[620-142G>T]
2L mapping	592783	SNV	1	G	T	25	100	31.32	Gene: FBgn0010323, Misc. feature: contig 2L_1_12 1..50000(1)	FBpp0309910:c.[794-150C>A]; FBpp0309909:c.[620-150C>A]
2L mapping	592972	SNV	1	T	G	21	100	34.2381	Gene: FBgn0010323, Misc. feature: contig 2L_1_12 1..50000(1)	FBpp0309910:c.[794-339A>C]; FBpp0309909:c.[620-339A>C]
2L mapping	592979	SNV	1	A	G	20	100	35.4	Gene: FBgn0010323, Misc. feature: contig 2L_1_12 1..50000(1)	FBpp0309909:c.[620-346T>C]; FBpp0309910:c.[794-346T>C]
2L mapping	593032	SNV	1	A	C	26	100	32.2308	Gene: FBgn0010323, Misc. feature: contig 2L_1_12 1..50000(1)	FBpp0309910:c.[794-399T>G]; FBpp0309909:c.[620-399T>G]
2L mapping	593577	SNV	1	G	A	16	100	36.5	Gene: FBgn0010323, Misc. feature: contig 2L_1_12 1..50000(1)	FBpp0309910:c.[793+11C>T]; FBpp0309909:c.[619+11C>T]
2L mapping	593740	SNV	1	G	A	25	64	32.3125	CDS: FBgn0010323, CDS: FBgn0010323, Exon: Exon, Gene: FBgn0010323, Misc. feature: contig 2L_1_12 1..50000(1), mRNA: FBgn0010323, mRNA: FBgn0010323	FBpp0309909:c.[467C>T]; FBpp0309910:c.[641C>T]	FBpp0309909:p.[Ala156Val]; FBpp0309910:p.[Ala214Val]
2L mapping	593883	SNV	1	G	A	20	100	31.75	CDS: FBgn0010323, CDS: FBgn0010323, Exon: Exon, Gene: FBgn0010323, Misc. feature: contig 2L_1_12 1..50000(1), mRNA: FBgn0010323, mRNA: FBgn0010323	FBpp0309910:c.[498C>T]; FBpp0309909:c.[324C>T]
2L mapping	593904	SNV	1	G	A	20	100	33.8	CDS: FBgn0010323, CDS: FBgn0010323, Exon: Exon, Gene: FBgn0010323, Misc. feature: contig 2L_1_12 1..50000(1), mRNA: FBgn0010323, mRNA: FBgn0010323	FBpp0309910:c.[477C>T]; FBpp0309909:c.[303C>T]
2L mapping	594114	SNV	1	C	T	16	100	35.625	CDS: FBgn0010323, CDS: FBgn0010323, Exon: Exon, Gene: FBgn0010323, Misc. feature: contig 2L_1_12 1..50000(1), mRNA: FBgn0010323, mRNA: FBgn0010323	FBpp0309909:c.[93G>A]; FBpp0309910:c.[267G>A]
2L mapping	594159	SNV	1	C	T	22	100	34.9545	CDS: FBgn0010323, CDS: FBgn0010323, Exon: Exon, Gene: FBgn0010323, Misc. feature: contig 2L_1_12 1..50000(1), mRNA: FBgn0010323, mRNA: FBgn0010323	FBpp0309909:c.[48G>A]; FBpp0309910:c.[222G>A]
2L mapping	594201	SNV	1	T	G	22	100	35.0455	CDS: FBgn0010323, CDS: FBgn0010323, Exon: Exon, Gene: FBgn0010323, Misc. feature: contig 2L_1_12 1..50000(1), mRNA: FBgn0010323, mRNA: FBgn0010323	FBpp0309910:c.[180A>C]; FBpp0309909:c.[6A>C]
2L mapping	594246	SNV	1	C	T	17	100	32.9412	CDS: FBgn0010323, Exon: Exon, Gene: FBgn0010323, Misc. feature: contig 2L_1_12 1..50000(1), mRNA: FBgn0010323, mRNA: FBgn0010323	FBpp0309910:c.135G>A
2L mapping	594294	SNV	1	C	G	15	100	32.8667	CDS: FBgn0010323, Exon: Exon, Gene: FBgn0010323, Misc. feature: contig 2L_1_12 1..50000(1), mRNA: FBgn0010323, mRNA: FBgn0010323	FBpp0309910:c.87G>C
2L mapping	594381	SNV	1	C	T	19	100	31.1053	Exon: Exon, Gene: FBgn0010323, Misc. feature: contig 2L_1_12 1..50000(1), mRNA: FBgn0010323, mRNA: FBgn0010323
2L mapping	594433	Insertion	1	-	T	15	73.3333	36.2727	Exon: Exon, Gene: FBgn0010323, Misc. feature: contig 2L_1_12 1..50000(1), mRNA: FBgn0010323, mRNA: FBgn0010323
2L mapping	594444	SNV	1	T	A	16	100	32.1875	Exon: Exon, Gene: FBgn0010323, Misc. feature: contig 2L_1_12 1..50000(1), mRNA: FBgn0010323, mRNA: FBgn0010323
2L mapping	594474	Deletion	6	TTACAA	-	20	65	34.4615	Exon: Exon, Gene: FBgn0010323, Misc. feature: contig 2L_1_12 1..50000(1), mRNA: FBgn0010323, mRNA: FBgn0010323
2L mapping	594500	SNV	1	G	A	22	95.4545	35.9524	Exon: Exon, Gene: FBgn0010323, Misc. feature: contig 2L_1_12 1..50000(1), mRNA: FBgn0010323, mRNA: FBgn0010323
2L mapping	594529	Insertion	1	-	T	27	92.5926	33.64	Exon: Exon, Gene: FBgn0010323, Misc. feature: contig 2L_1_12 1..50000(1), mRNA: FBgn0010323, mRNA: FBgn0010323
2L mapping	594620	SNV	1	T	A	26	96.1538	33.76	Exon: Exon, Gene: FBgn0010323, Misc. feature: contig 2L_1_12 1..50000(1), mRNA: FBgn0010323, mRNA: FBgn0010323
2L mapping	594623	SNV	1	A	T	26	96.1538	35.2	Exon: Exon, Gene: FBgn0010323, Misc. feature: contig 2L_1_12 1..50000(1), mRNA: FBgn0010323, mRNA: FBgn0010323
2L mapping	594642	SNV	1	T	A	28	100	35.6071	Exon: Exon, Gene: FBgn0010323, Misc. feature: contig 2L_1_12 1..50000(1), mRNA: FBgn0010323, mRNA: FBgn0010323
2L mapping	594773	SNV	1	G	T	23	100	36.4783	Misc. feature: contig 2L_1_12 1..50000(1)
2L mapping	594867	SNV	1	T	G	17	100	34.7647	Misc. feature: contig 2L_1_12 1..50000(1)
2L mapping	594902	SNV	1	C	T	21	95.2381	33	Misc. feature: contig 2L_1_12 1..50000(1)
2L mapping	594928	SNV	1	T	C	28	100	34.1786	Misc. feature: contig 2L_1_12 1..50000(1)
2L mapping	595265	SNV	1	T	G	22	100	36.1818	Misc. feature: contig 2L_1_12 1..50000(1)
2L mapping	595332	SNV	1	G	A	34	100	33.9118	Misc. feature: contig 2L_1_12 1..50000(1)
2L mapping	595623	Insertion	2	-	GT	16	87.5	35.0357	Misc. feature: contig 2L_1_12 1..50000(1)
2L mapping	595829	SNV	1	T	A	10	100	34.3	Misc. feature: contig 2L_1_12 1..50000(1)
2L mapping	595835	SNV	1	A	T	10	100	33.7	Misc. feature: contig 2L_1_12 1..50000(1)
2L mapping	595924	SNV	1	C	T	16	100	35.25	Misc. feature: contig 2L_1_12 1..50000(1)
2L mapping	596019	SNV	1	C	T	20	100	33.7	Misc. feature: contig 2L_1_12 1..50000(1)
2L mapping	596446	SNV	1	T	C	21	100	34.9524	Misc. feature: contig 2L_1_12 1..50000(1)
2L mapping	596664	SNV	1	C	T	30	100	35.3333	Misc. feature: contig 2L_1_12 1..50000(1)
2L mapping	596740	SNV	1	A	T	35	100	34.7429	Misc. feature: contig 2L_1_12 1..50000(1)
2L mapping	597108	Deletion	2	CT	-	22	68.1818	32.6	Misc. feature: contig 2L_1_12 1..50000(1)
2L mapping	597889	SNV	1	C	A	32	100	36.2812	Misc. feature: contig 2L_1_12 1..50000(1)
2L mapping	598060	SNV	1	T	G	16	100	34.9375	Misc. feature: contig 2L_1_12 1..50000(1)
2L mapping	598072	SNV	1	A	C	18	100	33.2222	Misc. feature: contig 2L_1_12 1..50000(1)
2L mapping	598441	SNV	1	C	T	25	100	36.52	Misc. feature: contig 2L_1_12 1..50000(1)
2L mapping	598503	SNV	1	C	T	22	100	35.7727	Misc. feature: contig 2L_1_12 1..50000(1)
2L mapping	598505	SNV	1	A	T	22	100	35.9545	Misc. feature: contig 2L_1_12 1..50000(1)
2L mapping	598510	SNV	1	A	T	23	100	34.6957	Misc. feature: contig 2L_1_12 1..50000(1)
2L mapping	598515	SNV	1	T	C	21	100	35.5238	Misc. feature: contig 2L_1_12 1..50000(1)
2L mapping	598529	SNV	1	T	A	29	100	35.1379	Misc. feature: contig 2L_1_12 1..50000(1)
2L mapping	598674	SNV	1	G	A	29	100	36.0345	Misc. feature: contig 2L_1_12 1..50000(1)
2L mapping	598800	SNV	1	G	A	37	100	34.8919	Misc. feature: contig 2L_1_12 1..50000(1)
2L mapping	599015	SNV	1	C	G	21	100	36.4286	Misc. feature: contig 2L_1_12 1..50000(1)
2L mapping	599129	SNV	1	G	A	34	100	35.7941	Misc. feature: contig 2L_1_12 1..50000(1)
2L mapping	599192	SNV	1	A	T	28	100	34.8571	Misc. feature: contig 2L_1_12 1..50000(1)
2L mapping	599200	SNV	1	C	T	29	100	34.9655	Misc. feature: contig 2L_1_12 1..50000(1)
2L mapping	599205	SNV	1	G	C	25	96	33.3333	Misc. feature: contig 2L_1_12 1..50000(1)
2L mapping	599214	SNV	1	T	A	23	95.6522	34.9545	Misc. feature: contig 2L_1_12 1..50000(1)
2L mapping	599216	SNV	1	A	G	23	95.6522	34.7727	Misc. feature: contig 2L_1_12 1..50000(1)
2L mapping	599308	SNV	1	T	G	21	100	35.8571	Misc. feature: contig 2L_1_12 1..50000(1)
2L mapping	599315	SNV	1	C	T	21	100	34.8571	Misc. feature: contig 2L_1_12 1..50000(1)
2L mapping	599377	SNV	1	A	C	23	100	33.7826	Misc. feature: contig 2L_1_12 1..50000(1)
2L mapping	599421	SNV	1	T	C	26	96.1538	36.12	Misc. feature: contig 2L_1_12 1..50000(1)
2L mapping	599446	SNV	1	A	T	26	96.1538	35.6	Misc. feature: contig 2L_1_12 1..50000(1)
2L mapping	599448	SNV	1	T	G	26	96.1538	34.4	Misc. feature: contig 2L_1_12 1..50000(1)
2L mapping	600009	Deletion	6	CAGCAG	-	15	53.3333	25.875	Misc. feature: contig 2L_1_13 1..50000(1)
2L mapping	600255	SNV	1	A	G	18	100	36.2222	Misc. feature: contig 2L_1_13 1..50000(1)
2L mapping	600441	SNV	1	G	A	13	100	35.5385	Misc. feature: contig 2L_1_13 1..50000(1)
2L mapping	600693	SNV	1	G	A	20	100	34	Misc. feature: contig 2L_1_13 1..50000(1)
2L mapping	601089	SNV	1	A	G	16	100	35.5	Misc. feature: contig 2L_1_13 1..50000(1)
2L mapping	601111	SNV	1	C	T	21	85.7143	36.7778	Misc. feature: contig 2L_1_13 1..50000(1)
2L mapping	601478	SNV	1	T	G	25	100	36.44	Misc. feature: contig 2L_1_13 1..50000(1)
2L mapping	601841	SNV	1	G	T	20	100	34.55	Misc. feature: contig 2L_1_13 1..50000(1)
2L mapping	602352	SNV	1	T	A	11	100	34.1818	Misc. feature: contig 2L_1_13 1..50000(1)
2L mapping	602354	SNV	1	T	G	11	100	34.9091	Misc. feature: contig 2L_1_13 1..50000(1)
2L mapping	602361	SNV	1	T	A	18	100	35.2778	Misc. feature: contig 2L_1_13 1..50000(1)
2L mapping	602363	Insertion	1	-	T	18	100	36.7778	Misc. feature: contig 2L_1_13 1..50000(1)
2L mapping	602486	SNV	1	C	T	22	100	36.3636	Misc. feature: contig 2L_1_13 1..50000(1)
2L mapping	602562	SNV	1	A	T	26	53.8462	36.2857	Misc. feature: contig 2L_1_13 1..50000(1)
2L mapping	602564	Deletion	1	A	-	24	58.3333	37	Misc. feature: contig 2L_1_13 1..50000(1)
2L mapping	602567	Insertion	1	-	G	24	62.5	36.4667	Misc. feature: contig 2L_1_13 1..50000(1)
2L mapping	602728	MNV	2	AA	CC	22	100	34.4545	Misc. feature: contig 2L_1_13 1..50000(1)
2L mapping	603249	SNV	1	G	A	30	100	34.5	CDS: FBgn0031270, CDS: FBgn0031270, Exon: Exon, Exon: Exon, Gene: FBgn0031270, Misc. feature: contig 2L_1_13 1..50000(1), mRNA: FBgn0031270, mRNA: FBgn0031270	FBpp0301726:c.[255G>A]; FBpp0077731:c.[312G>A]
2L mapping	603453	SNV	1	G	A	37	100	34.0541	Exon: Exon, Exon: Exon, Gene: FBgn0031270, Misc. feature: contig 2L_1_13 1..50000(1), mRNA: FBgn0031270, mRNA: FBgn0031270
2L mapping	603489	SNV	1	C	G	36	100	35.8333	Exon: Exon, Exon: Exon, Gene: FBgn0031270, Misc. feature: contig 2L_1_13 1..50000(1), mRNA: FBgn0031270, mRNA: FBgn0031270
2L mapping	603499	SNV	1	G	T	37	100	33.8649	Exon: Exon, Exon: Exon, Gene: FBgn0031270, Misc. feature: contig 2L_1_13 1..50000(1), mRNA: FBgn0031270, mRNA: FBgn0031270
2L mapping	603768	SNV	1	C	G	20	100	36.3	Exon: Exon, Gene: FBgn0031270, Misc. feature: contig 2L_1_13 1..50000(1), mRNA: FBgn0031270
2L mapping	603926	SNV	1	G	A	13	100	36.0769	Exon: Exon, Gene: FBgn0031270, Misc. feature: contig 2L_1_13 1..50000(1), mRNA: FBgn0031270
2L mapping	604683	SNV	1	C	T	25	100	33.88	Misc. feature: contig 2L_1_13 1..50000(1)
2L mapping	604697	SNV	1	C	A	34	100	35.8529	Misc. feature: contig 2L_1_13 1..50000(1)
2L mapping	604885	SNV	1	A	G	19	100	33.3684	Misc. feature: contig 2L_1_13 1..50000(1)
2L mapping	604982	Insertion	2	-	TT	19	78.9474	34.5333	Misc. feature: contig 2L_1_13 1..50000(1)
2L mapping	605257	SNV	1	G	A	24	95.8333	35.1739	Misc. feature: contig 2L_1_13 1..50000(1)
2L mapping	605406	Insertion	2	-	TT	21	71.4286	35.6	Misc. feature: contig 2L_1_13 1..50000(1)
2L mapping	605424	Deletion	1	T	-	17	88.2353	32.6667	Misc. feature: contig 2L_1_13 1..50000(1)
2L mapping	605568	SNV	1	G	T	17	100	33.6471	Misc. feature: contig 2L_1_13 1..50000(1)
2L mapping	605574	Insertion	7	-	AGAGGGA	14	71.4286	33.5	Misc. feature: contig 2L_1_13 1..50000(1)
2L mapping	606292	SNV	1	C	G	30	100	33.9667	Misc. RNA: FBgn0263657, Exon: Exon, Gene: FBgn0263657, Misc. feature: contig 2L_1_13 1..50000(1)
2L mapping	606304	SNV	1	C	T	29	100	34.6207	Misc. RNA: FBgn0263657, Exon: Exon, Gene: FBgn0263657, Misc. feature: contig 2L_1_13 1..50000(1)
2L mapping	606349	SNV	1	C	T	27	88.8889	34.5833	Misc. RNA: FBgn0263657, Exon: Exon, Gene: FBgn0263657, Misc. feature: contig 2L_1_13 1..50000(1)
2L mapping	606389	SNV	1	C	T	21	100	33.4762	Misc. RNA: FBgn0263657, Exon: Exon, Gene: FBgn0263657, Misc. feature: contig 2L_1_13 1..50000(1)
2L mapping	606405	SNV	1	A	C	15	100	33.2667	Misc. RNA: FBgn0263657, Exon: Exon, Gene: FBgn0263657, Misc. feature: contig 2L_1_13 1..50000(1)
2L mapping	606418	SNV	1	T	C	19	100	32.9474	Misc. feature: contig 2L_1_13 1..50000(1)
2L mapping	606427	SNV	1	T	C	19	100	35.7368	Misc. feature: contig 2L_1_13 1..50000(1)
2L mapping	606430	SNV	1	A	G	19	100	35.1579	Misc. feature: contig 2L_1_13 1..50000(1)
2L mapping	606452	SNV	1	C	T	21	100	36.3333	Misc. feature: contig 2L_1_13 1..50000(1)
2L mapping	606460	SNV	1	T	C	22	100	34.6818	Misc. feature: contig 2L_1_13 1..50000(1)
2L mapping	606477	SNV	1	A	G	25	100	34.48	Misc. feature: contig 2L_1_13 1..50000(1)
2L mapping	607159	SNV	1	G	T	22	100	34.8636	Misc. feature: contig 2L_1_13 1..50000(1)
2L mapping	608897	SNV	1	C	T	23	100	34.6087	Misc. RNA: FBgn0263658, Exon: Exon, Gene: FBgn0263658, Misc. feature: contig 2L_1_13 1..50000(1)
2L mapping	608982	SNV	1	T	G	19	100	31.8421	Misc. RNA: FBgn0263658, Exon: Exon, Gene: FBgn0263658, Misc. feature: contig 2L_1_13 1..50000(1)
2L mapping	610019	SNV	1	C	T	21	100	34.8095	Misc. feature: contig 2L_1_13 1..50000(1)
2L mapping	611165	Replacement	2	T	GG	22	100	33.3864	Misc. feature: contig 2L_1_13 1..50000(1)
2L mapping	611169	SNV	1	G	C	24	100	35.0833	Misc. feature: contig 2L_1_13 1..50000(1)
2L mapping	611176	SNV	1	C	G	23	100	33.0435	Misc. feature: contig 2L_1_13 1..50000(1)
2L mapping	611186	SNV	1	T	C	24	100	35.3333	Misc. feature: contig 2L_1_13 1..50000(1)
2L mapping	611193	SNV	1	G	A	22	100	34.8636	Misc. feature: contig 2L_1_13 1..50000(1)
2L mapping	611197	SNV	1	A	T	21	100	36.3333	Misc. feature: contig 2L_1_13 1..50000(1)
2L mapping	611199	SNV	1	T	A	21	100	35.5238	Misc. feature: contig 2L_1_13 1..50000(1)
2L mapping	611211	MNV	2	GT	AC	20	100	32.875	Misc. feature: contig 2L_1_13 1..50000(1)
2L mapping	611399	SNV	1	G	T	17	100	35.1176	Misc. feature: contig 2L_1_13 1..50000(1)
2L mapping	611567	MNV	2	TG	CA	19	100	33.0526	Misc. feature: contig 2L_1_13 1..50000(1)
2L mapping	611787	Deletion	1	T	-	24	87.5	34.8095	Misc. feature: contig 2L_1_13 1..50000(1)
2L mapping	611901	SNV	1	T	C	27	100	35.6296	Misc. feature: contig 2L_1_13 1..50000(1)
2L mapping	612003	SNV	1	A	T	24	100	32.8333	Misc. feature: contig 2L_1_13 1..50000(1)
2L mapping	612060	SNV	1	G	A	22	95.4545	34.5714	Misc. feature: contig 2L_1_13 1..50000(1)
2L mapping	612141	SNV	1	A	T	25	100	35.28	Misc. feature: contig 2L_1_13 1..50000(1)
2L mapping	612461	SNV	1	G	C	27	96.2963	34.1538	Misc. feature: contig 2L_1_13 1..50000(1)
2L mapping	612618	SNV	1	A	T	23	100	31.4783	Misc. feature: contig 2L_1_13 1..50000(1)
2L mapping	612854	SNV	1	C	T	29	100	34.6552	Misc. feature: contig 2L_1_13 1..50000(1)
2L mapping	612876	Deletion	1	A	-	23	95.6522	35.0455	Misc. feature: contig 2L_1_13 1..50000(1)
2L mapping	612878	SNV	1	A	G	23	95.6522	36.3182	Misc. feature: contig 2L_1_13 1..50000(1)
2L mapping	612938	SNV	1	G	T	22	100	34.4545	Misc. feature: contig 2L_1_13 1..50000(1)
2L mapping	612988	Deletion	3	AAA	-	23	91.3043	34.3333	Misc. feature: contig 2L_1_13 1..50000(1)
2L mapping	613014	MNV	3	AAA	GTT	17	100	36.2941	Misc. feature: contig 2L_1_13 1..50000(1)
2L mapping	613018	MNV	2	TT	CC	17	100	33.7353	Misc. feature: contig 2L_1_13 1..50000(1)
2L mapping	613050	SNV	1	A	G	28	100	33.5	Misc. feature: contig 2L_1_13 1..50000(1)
2L mapping	613416	SNV	1	A	G	18	100	35.1667	Misc. feature: contig 2L_1_13 1..50000(1)
2L mapping	613433	SNV	1	C	A	17	100	35.6471	Misc. feature: contig 2L_1_13 1..50000(1)
2L mapping	613463	SNV	1	T	C	21	90.4762	36.5789	Misc. feature: contig 2L_1_13 1..50000(1)
2L mapping	613509	SNV	1	G	C	19	100	35.3684	Misc. feature: contig 2L_1_13 1..50000(1)
2L mapping	613568	SNV	1	G	C	18	100	33.5556	Misc. feature: contig 2L_1_13 1..50000(1)
2L mapping	613574	SNV	1	G	A	17	100	35.9412	Misc. feature: contig 2L_1_13 1..50000(1)
2L mapping	613582	SNV	1	C	T	17	100	34.8235	Misc. feature: contig 2L_1_13 1..50000(1)
2L mapping	613585	SNV	1	C	T	17	100	34.8235	Misc. feature: contig 2L_1_13 1..50000(1)
2L mapping	613627	SNV	1	C	A	22	100	36.8182	Misc. feature: contig 2L_1_13 1..50000(1)
2L mapping	613689	Deletion	1	T	-	15	60	32.8889	Misc. feature: contig 2L_1_13 1..50000(1)
2L mapping	613696	SNV	1	C	G	10	90	36.1111	Misc. feature: contig 2L_1_13 1..50000(1)
2L mapping	613698	SNV	1	G	C	10	90	32.8889	Misc. feature: contig 2L_1_13 1..50000(1)
2L mapping	613722	SNV	1	C	T	11	100	31.1818	Misc. feature: contig 2L_1_13 1..50000(1)
2L mapping	613728	SNV	1	G	A	13	100	32.5385	Misc. feature: contig 2L_1_13 1..50000(1)
2L mapping	613733	SNV	1	C	G	13	100	31.6154	Misc. feature: contig 2L_1_13 1..50000(1)
2L mapping	613736	SNV	1	A	T	14	100	34.7857	Misc. feature: contig 2L_1_13 1..50000(1)
2L mapping	613786	SNV	1	A	C	19	100	32.1053	Misc. feature: contig 2L_1_13 1..50000(1)
2L mapping	613799	SNV	1	C	G	20	100	30.25	Misc. feature: contig 2L_1_13 1..50000(1)
2L mapping	613806	SNV	1	C	G	21	100	29.2857	Misc. feature: contig 2L_1_13 1..50000(1)
2L mapping	613871	SNV	1	C	T	20	100	31.95	Misc. feature: contig 2L_1_13 1..50000(1)
2L mapping	613971	SNV	1	T	G	29	100	32.069	Misc. feature: contig 2L_1_13 1..50000(1)
2L mapping	614453	SNV	1	T	A	22	100	35.1364	Misc. feature: contig 2L_1_13 1..50000(1)
2L mapping	614456	SNV	1	C	T	22	100	36.8182	Misc. feature: contig 2L_1_13 1..50000(1)
2L mapping	614460	SNV	1	C	T	21	100	36.4286	Misc. feature: contig 2L_1_13 1..50000(1)
2L mapping	614463	SNV	1	A	G	19	100	35.8421	Misc. feature: contig 2L_1_13 1..50000(1)
2L mapping	614473	SNV	1	C	T	22	95.4545	36.5238	Misc. feature: contig 2L_1_13 1..50000(1)
2L mapping	614540	SNV	1	T	C	29	100	32.069	Misc. feature: contig 2L_1_13 1..50000(1)
2L mapping	614544	Insertion	1	-	A	30	96.6667	35.931	Misc. feature: contig 2L_1_13 1..50000(1)
2L mapping	614652	SNV	1	A	G	23	100	35.4348	Misc. feature: contig 2L_1_13 1..50000(1)
2L mapping	614667	Insertion	1	-	C	19	89.4737	35.0588	Misc. feature: contig 2L_1_13 1..50000(1)
2L mapping	614671	SNV	1	T	A	18	94.4444	36.1765	Misc. feature: contig 2L_1_13 1..50000(1)
2L mapping	614709	SNV	1	T	C	19	100	35.5789	Misc. feature: contig 2L_1_13 1..50000(1)
2L mapping	615133	SNV	1	T	C	23	100	36	Misc. feature: contig 2L_1_13 1..50000(1)
2L mapping	615148	SNV	1	A	C	26	100	32.3846	Misc. feature: contig 2L_1_13 1..50000(1)
2L mapping	615181	SNV	1	T	A	24	100	35.4583	Misc. feature: contig 2L_1_13 1..50000(1)
2L mapping	615192	Insertion	4	-	GATC	21	80.9524	34.8088	Misc. feature: contig 2L_1_13 1..50000(1)
2L mapping	615202	SNV	1	G	T	25	100	34.44	Misc. feature: contig 2L_1_13 1..50000(1)
2L mapping	615281	SNV	1	C	A	18	100	32.7222	Misc. feature: contig 2L_1_13 1..50000(1)
2L mapping	615310	Replacement	2	TG	A	14	100	33.2143	Misc. feature: contig 2L_1_13 1..50000(1)
2L mapping	615318	Replacement	2	C	AA	11	100	33.1818	Misc. feature: contig 2L_1_13 1..50000(1)
2L mapping	615321	MNV	2	GC	TT	11	100	36.1818	Misc. feature: contig 2L_1_13 1..50000(1)
2L mapping	615324	SNV	1	C	A	11	100	34.1818	Misc. feature: contig 2L_1_13 1..50000(1)
2L mapping	615326	SNV	1	T	A	11	100	34.0909	Misc. feature: contig 2L_1_13 1..50000(1)
2L mapping	615341	Insertion	1	-	C	20	100	36.5	Misc. feature: contig 2L_1_13 1..50000(1)
2L mapping	615493	SNV	1	G	A	25	100	36.84	Misc. feature: contig 2L_1_13 1..50000(1)
2L mapping	615825	SNV	1	T	A	23	100	34.4783	Misc. feature: contig 2L_1_13 1..50000(1)
2L mapping	615853	SNV	1	C	T	22	100	34.9545	Misc. feature: contig 2L_1_13 1..50000(1)
2L mapping	615855	SNV	1	T	A	22	100	37	Misc. feature: contig 2L_1_13 1..50000(1)
2L mapping	615874	SNV	1	T	C	19	100	32.9474	Misc. feature: contig 2L_1_13 1..50000(1)
2L mapping	615903	SNV	1	C	T	31	96.7742	34.4333	Misc. feature: contig 2L_1_13 1..50000(1)
2L mapping	616746	SNV	1	T	G	28	96.4286	33.9259	Misc. feature: contig 2L_1_13 1..50000(1)
2L mapping	616990	Deletion	1	A	-	18	66.6667	26.5	Misc. feature: contig 2L_1_13 1..50000(1)
2L mapping	617400	SNV	1	T	A	25	100	34.88	Misc. feature: contig 2L_1_13 1..50000(1)
2L mapping	617466	SNV	1	T	G	17	100	36.5294	Misc. feature: contig 2L_1_13 1..50000(1)
2L mapping	617471	SNV	1	G	A	16	100	34.875	Misc. feature: contig 2L_1_13 1..50000(1)
2L mapping	617477	SNV	1	A	G	18	100	35.5556	Misc. feature: contig 2L_1_13 1..50000(1)
2L mapping	617479	SNV	1	T	C	18	100	35.7222	Misc. feature: contig 2L_1_13 1..50000(1)
2L mapping	617495	SNV	1	T	G	16	100	35	Misc. feature: contig 2L_1_13 1..50000(1)
2L mapping	617773	Deletion	1	T	-	15	93.3333	36.7143	Misc. feature: contig 2L_1_13 1..50000(1)
2L mapping	617998	SNV	1	C	T	19	100	36.5789	Misc. feature: contig 2L_1_13 1..50000(1)
2L mapping	618218	SNV	1	A	T	24	100	33.8333	Misc. feature: contig 2L_1_13 1..50000(1)
2L mapping	618226	SNV	1	A	T	24	100	34.2917	Misc. feature: contig 2L_1_13 1..50000(1)
2L mapping	618253	SNV	1	T	C	25	100	34.88	Misc. feature: contig 2L_1_13 1..50000(1)
2L mapping	618765	SNV	1	T	C	22	100	35.1364	Misc. feature: contig 2L_1_13 1..50000(1)
2L mapping	618782	SNV	1	T	C	21	100	35.7619	Misc. feature: contig 2L_1_13 1..50000(1)
2L mapping	619262	Deletion	3	AAA	-	24	79.1667	33.3158	Misc. feature: contig 2L_1_13 1..50000(1)
2L mapping	619922	SNV	1	G	C	33	100	35.5758	Misc. feature: contig 2L_1_13 1..50000(1)
2L mapping	619965	SNV	1	G	C	31	100	33.0968	Misc. feature: contig 2L_1_13 1..50000(1)
2L mapping	620049	SNV	1	A	G	18	100	35.7778	Misc. feature: contig 2L_1_13 1..50000(1)
2L mapping	620069	SNV	1	C	T	17	100	36.2941	Misc. feature: contig 2L_1_13 1..50000(1)
2L mapping	620098	Deletion	6	GAGAGA	-	11	63.6364	27.1429	Misc. feature: contig 2L_1_13 1..50000(1)
2L mapping	620211	SNV	1	A	T	26	100	35.0769	Misc. feature: contig 2L_1_13 1..50000(1)
2L mapping	620229	Insertion	1	-	G	26	88.4615	35.1739	Misc. feature: contig 2L_1_13 1..50000(1)
2L mapping	620314	SNV	1	G	A	20	100	35.35	Exon: Exon, Gene: FBgn0040106, Misc. feature: contig 2L_1_13 1..50000(1), mRNA: FBgn0040106
2L mapping	620316	SNV	1	A	G	20	100	35.4	Exon: Exon, Gene: FBgn0040106, Misc. feature: contig 2L_1_13 1..50000(1), mRNA: FBgn0040106
2L mapping	620686	SNV	1	G	A	18	100	36.4444	CDS: FBgn0040106, Exon: Exon, Gene: FBgn0040106, Misc. feature: contig 2L_1_13 1..50000(1), mRNA: FBgn0040106	FBpp0300624:c.497C>T	FBpp0300624:p.Thr166Met
2L mapping	622022	Insertion	1	-	T	11	100	35.3636	Misc. feature: contig 2L_1_13 1..50000(1)
2L mapping	622331	SNV	1	G	A	19	100	32.4737	Misc. feature: contig 2L_1_13 1..50000(1)
2L mapping	622342	SNV	1	A	G	20	100	36.4	Misc. feature: contig 2L_1_13 1..50000(1)
2L mapping	622483	Deletion	1	C	-	26	100	30.6923	Misc. feature: contig 2L_1_13 1..50000(1)
2L mapping	622502	SNV	1	A	G	20	100	32.3	Misc. feature: contig 2L_1_13 1..50000(1)
2L mapping	622853	SNV	1	T	C	24	100	35.2917	Misc. feature: contig 2L_1_13 1..50000(1)
2L mapping	622941	SNV	1	C	G	27	100	33.4815	Misc. feature: contig 2L_1_13 1..50000(1)
2L mapping	622994	SNV	1	T	C	20	100	36.3	Misc. feature: contig 2L_1_13 1..50000(1)
2L mapping	623017	SNV	1	G	A	17	100	34.3529	Misc. feature: contig 2L_1_13 1..50000(1)
2L mapping	623022	SNV	1	C	T	18	100	35.7778	Misc. feature: contig 2L_1_13 1..50000(1)
2L mapping	623029	SNV	1	T	A	16	100	35.875	Misc. feature: contig 2L_1_13 1..50000(1)
2L mapping	623033	SNV	1	A	G	14	100	33.7143	Misc. feature: contig 2L_1_13 1..50000(1)
2L mapping	623043	SNV	1	T	C	16	100	34.6875	Misc. feature: contig 2L_1_13 1..50000(1)
2L mapping	623259	SNV	1	A	C	17	100	34.9412	Misc. RNA: FBgn0266032, Exon: Exon, Gene: FBgn0266032, Misc. feature: contig 2L_1_13 1..50000(1)
2L mapping	623374	SNV	1	A	G	25	100	33.76	Misc. RNA: FBgn0266032, Exon: Exon, Gene: FBgn0266032, Misc. feature: contig 2L_1_13 1..50000(1)
2L mapping	623471	SNV	1	A	T	16	100	36.75	Misc. RNA: FBgn0266032, Exon: Exon, Gene: FBgn0266032, Misc. feature: contig 2L_1_13 1..50000(1)
2L mapping	624432	SNV	1	C	G	32	100	32.9375	Misc. feature: contig 2L_1_13 1..50000(1)
2L mapping	625292	SNV	1	A	G	30	100	36.3333	CDS: FBgn0040107, Exon: Exon, Gene: FBgn0040107, Misc. feature: contig 2L_1_13 1..50000(1), mRNA: FBgn0040107	FBpp0077663:c.649A>G	FBpp0077663:p.Ile217Val
2L mapping	626592	Deletion	1	G	-	89	41.573	31	CDS: FBgn0031273, Exon: Exon, Gene: FBgn0031273, Misc. feature: contig 2L_1_13 1..50000(1), mRNA: FBgn0031273	FBpp0077664:c.930delG	FBpp0077664:p.Glu311fs
2L mapping	626598	Deletion	1	A	-	89	41.573	32.8378	CDS: FBgn0031273, Exon: Exon, Gene: FBgn0031273, Misc. feature: contig 2L_1_13 1..50000(1), mRNA: FBgn0031273	FBpp0077664:c.936delA	FBpp0077664:p.Arg314fs
2L mapping	626600	SNV	1	A	G	88	60.2273	31.6415	CDS: FBgn0031273, Exon: Exon, Gene: FBgn0031273, Misc. feature: contig 2L_1_13 1..50000(1), mRNA: FBgn0031273	FBpp0077664:c.938A>G	FBpp0077664:p.Lys313Arg
2L mapping	626611	MNV	2	GA	AG	92	38.0435	34.6143	CDS: FBgn0031273, Exon: Exon, Gene: FBgn0031273, Misc. feature: contig 2L_1_13 1..50000(1), mRNA: FBgn0031273	FBpp0077664:c.949_950delGAinsAG	FBpp0077664:p.Glu317Arg
2L mapping	626628	Deletion	1	G	-	189	56.6138	30.6075	CDS: FBgn0031273, Exon: Exon, Gene: FBgn0031273, Misc. feature: contig 2L_1_13 1..50000(1), mRNA: FBgn0031273	FBpp0077664:c.966delG	FBpp0077664:p.Glu323fs
2L mapping	626635	SNV	1	A	G	462	37.6623	29.3736	CDS: FBgn0031273, Exon: Exon, Gene: FBgn0031273, Misc. feature: contig 2L_1_13 1..50000(1), mRNA: FBgn0031273	FBpp0077664:c.973A>G	FBpp0077664:p.Lys325Glu
2L mapping	626646	Deletion	1	G	-	485	53.8144	29.2759	CDS: FBgn0031273, Exon: Exon, Gene: FBgn0031273, Misc. feature: contig 2L_1_13 1..50000(1), mRNA: FBgn0031273	FBpp0077664:c.984delG	FBpp0077664:p.Glu329fs
2L mapping	626652	Deletion	1	A	-	527	48.5769	29.8242	CDS: FBgn0031273, Exon: Exon, Gene: FBgn0031273, Misc. feature: contig 2L_1_13 1..50000(1), mRNA: FBgn0031273	FBpp0077664:c.990delA	FBpp0077664:p.Arg332fs
2L mapping	626654	SNV	1	A	G	544	48.3456	32.1597	CDS: FBgn0031273, Exon: Exon, Gene: FBgn0031273, Misc. feature: contig 2L_1_13 1..50000(1), mRNA: FBgn0031273	FBpp0077664:c.992A>G	FBpp0077664:p.Lys331Arg
2L mapping	626662	Deletion	1	G	-	554	42.4188	34.034	CDS: FBgn0031273, Exon: Exon, Gene: FBgn0031273, Misc. feature: contig 2L_1_13 1..50000(1), mRNA: FBgn0031273	FBpp0077664:c.1000delG	FBpp0077664:p.Glu334fs
2L mapping	626665	MNV	2	GA	AG	544	45.2206	34.563	CDS: FBgn0031273, Exon: Exon, Gene: FBgn0031273, Misc. feature: contig 2L_1_13 1..50000(1), mRNA: FBgn0031273	FBpp0077664:c.1003_1004delGAinsAG	FBpp0077664:p.Glu335Arg
2L mapping	626670	Deletion	1	A	-	552	72.2826	31.1454	CDS: FBgn0031273, Exon: Exon, Gene: FBgn0031273, Misc. feature: contig 2L_1_13 1..50000(1), mRNA: FBgn0031273	FBpp0077664:c.1008delA	FBpp0077664:p.Arg337fs
2L mapping	626677	Insertion	1	-	A	532	53.5714	35.5719	CDS: FBgn0031273, Exon: Exon, Gene: FBgn0031273, Misc. feature: contig 2L_1_13 1..50000(1), mRNA: FBgn0031273	FBpp0077664:c.1014_1015insA	FBpp0077664:p.Glu339fs
2L mapping	626682	Deletion	1	G	-	542	50.369	34.0366	CDS: FBgn0031273, Exon: Exon, Gene: FBgn0031273, Misc. feature: contig 2L_1_13 1..50000(1), mRNA: FBgn0031273	FBpp0077664:c.1020delG	FBpp0077664:p.Glu341fs
2L mapping	626688	Deletion	1	A	-	604	39.404	34.7269	CDS: FBgn0031273, Exon: Exon, Gene: FBgn0031273, Misc. feature: contig 2L_1_13 1..50000(1), mRNA: FBgn0031273	FBpp0077664:c.1026delA	FBpp0077664:p.Glu345fs
2L mapping	626690	SNV	1	A	G	604	40.7285	35.5772	CDS: FBgn0031273, Exon: Exon, Gene: FBgn0031273, Misc. feature: contig 2L_1_13 1..50000(1), mRNA: FBgn0031273	FBpp0077664:c.1028A>G	FBpp0077664:p.Lys343Arg
2L mapping	626693	SNV	1	A	G	608	73.3553	34.3857	CDS: FBgn0031273, Exon: Exon, Gene: FBgn0031273, Misc. feature: contig 2L_1_13 1..50000(1), mRNA: FBgn0031273	FBpp0077664:c.1031A>G	FBpp0077664:p.Lys344Arg
2L mapping	626698	Deletion	1	G	-	620	37.7419	35.2906	CDS: FBgn0031273, Exon: Exon, Gene: FBgn0031273, Misc. feature: contig 2L_1_13 1..50000(1), mRNA: FBgn0031273	FBpp0077664:c.1036delG	FBpp0077664:p.Glu346fs
2L mapping	626701	MNV	2	GA	AG	637	42.2292	35.9926	CDS: FBgn0031273, Exon: Exon, Gene: FBgn0031273, Misc. feature: contig 2L_1_13 1..50000(1), mRNA: FBgn0031273	FBpp0077664:c.1039_1040delGAinsAG	FBpp0077664:p.Glu347Arg
2L mapping	626718	Deletion	1	G	-	683	46.2665	33.2722	CDS: FBgn0031273, Exon: Exon, Gene: FBgn0031273, Misc. feature: contig 2L_1_13 1..50000(1), mRNA: FBgn0031273	FBpp0077664:c.1056delG	FBpp0077664:p.Glu353fs
2L mapping	626725	Insertion	1	-	G	613	46.0033	34.8191	CDS: FBgn0031273, Exon: Exon, Gene: FBgn0031273, Misc. feature: contig 2L_1_13 1..50000(1), mRNA: FBgn0031273	FBpp0077664:c.1062_1063insG	FBpp0077664:p.Lys355fs
2L mapping	626734	SNV	1	C	G	236	75	32.5198	CDS: FBgn0031273, Exon: Exon, Gene: FBgn0031273, Misc. feature: contig 2L_1_13 1..50000(1), mRNA: FBgn0031273	FBpp0077664:c.1072C>G	FBpp0077664:p.His358Asp
2L mapping	626736	Deletion	1	T	-	235	61.2766	34.3472	CDS: FBgn0031273, Exon: Exon, Gene: FBgn0031273, Misc. feature: contig 2L_1_13 1..50000(1), mRNA: FBgn0031273	FBpp0077664:c.1074delT	FBpp0077664:p.His358fs
2L mapping	626745	SNV	1	A	G	242	41.7355	34.5149	CDS: FBgn0031273, Exon: Exon, Gene: FBgn0031273, Misc. feature: contig 2L_1_13 1..50000(1), mRNA: FBgn0031273	FBpp0077664:c.1083A>G
2L mapping	626749	Deletion	1	G	-	251	40.239	34.7426	CDS: FBgn0031273, Exon: Exon, Gene: FBgn0031273, Misc. feature: contig 2L_1_13 1..50000(1), mRNA: FBgn0031273	FBpp0077664:c.1087delG	FBpp0077664:p.Glu363fs
2L mapping	626755	Deletion	2	GA	-	249	40.9639	34.8725	CDS: FBgn0031273, Exon: Exon, Gene: FBgn0031273, Misc. feature: contig 2L_1_13 1..50000(1), mRNA: FBgn0031273	FBpp0077664:c.1093_1094delGA	FBpp0077664:p.Glu365fs
2L mapping	626776	Insertion	1	-	G	239	76.9874	34.2772	CDS: FBgn0031273, Exon: Exon, Gene: FBgn0031273, Misc. feature: contig 2L_1_13 1..50000(1), mRNA: FBgn0031273	FBpp0077664:c.1113_1114insG	FBpp0077664:p.Arg372fs
2L mapping	626785	MNV	2	GA	AG	164	56.0976	36.0924	CDS: FBgn0031273, Exon: Exon, Gene: FBgn0031273, Misc. feature: contig 2L_1_13 1..50000(1), mRNA: FBgn0031273	FBpp0077664:c.1123_1124delGAinsAG	FBpp0077664:p.Glu375Arg
2L mapping	626790	SNV	1	G	A	154	75.974	36.3333	CDS: FBgn0031273, Exon: Exon, Gene: FBgn0031273, Misc. feature: contig 2L_1_13 1..50000(1), mRNA: FBgn0031273	FBpp0077664:c.1128G>A
2L mapping	626797	Deletion	1	C	-	74	54.0541	32.15	CDS: FBgn0031273, Exon: Exon, Gene: FBgn0031273, Misc. feature: contig 2L_1_13 1..50000(1), mRNA: FBgn0031273	FBpp0077664:c.1135delC	FBpp0077664:p.Arg379fs
2L mapping	626800	Insertion	1	-	G	72	55.5556	34.675	CDS: FBgn0031273, Exon: Exon, Gene: FBgn0031273, Misc. feature: contig 2L_1_13 1..50000(1), mRNA: FBgn0031273	FBpp0077664:c.1137_1138insG	FBpp0077664:p.Lys380fs
2L mapping	626803	SNV	1	G	A	70	60	35.7381	CDS: FBgn0031273, Exon: Exon, Gene: FBgn0031273, Misc. feature: contig 2L_1_13 1..50000(1), mRNA: FBgn0031273	FBpp0077664:c.1141G>A	FBpp0077664:p.Glu381Lys
2L mapping	626806	SNV	1	G	A	70	57.1429	34.825	CDS: FBgn0031273, Exon: Exon, Gene: FBgn0031273, Misc. feature: contig 2L_1_13 1..50000(1), mRNA: FBgn0031273	FBpp0077664:c.1144G>A	FBpp0077664:p.Glu382Lys
2L mapping	626809	MNV	2	GA	AG	68	58.8235	35.875	CDS: FBgn0031273, Exon: Exon, Gene: FBgn0031273, Misc. feature: contig 2L_1_13 1..50000(1), mRNA: FBgn0031273	FBpp0077664:c.1147_1148delGAinsAG	FBpp0077664:p.Glu383Arg
2L mapping	626816	Deletion	1	G	-	62	61.2903	32.9737	CDS: FBgn0031273, Exon: Exon, Gene: FBgn0031273, Misc. feature: contig 2L_1_13 1..50000(1), mRNA: FBgn0031273	FBpp0077664:c.1154delG	FBpp0077664:p.Arg385fs
2L mapping	626821	Insertion	1	-	A	48	54.1667	35.6154	CDS: FBgn0031273, Exon: Exon, Gene: FBgn0031273, Misc. feature: contig 2L_1_13 1..50000(1), mRNA: FBgn0031273	FBpp0077664:c.1158_1159insA	FBpp0077664:p.Glu387fs
2L mapping	626884	Insertion	1	-	G	74	54.0541	29.1	CDS: FBgn0031273, Exon: Exon, Gene: FBgn0031273, Misc. feature: contig 2L_1_13 1..50000(1), mRNA: FBgn0031273	FBpp0077664:c.1221_1222insG	FBpp0077664:p.Lys408fs
2L mapping	626887	Insertion	1	-	A	71	54.9296	33.8462	CDS: FBgn0031273, Exon: Exon, Gene: FBgn0031273, Misc. feature: contig 2L_1_13 1..50000(1), mRNA: FBgn0031273	FBpp0077664:c.1224_1225insA	FBpp0077664:p.Glu409fs
2L mapping	626893	MNV	3	GAA	ATG	81	44.4444	28.4907	CDS: FBgn0031273, Exon: Exon, Gene: FBgn0031273, Misc. feature: contig 2L_1_13 1..50000(1), mRNA: FBgn0031273	FBpp0077664:c.1231_1233delGAAinsATG	FBpp0077664:p.Glu411Met
2L mapping	626902	SNV	1	A	G	93	69.8925	33.5385	CDS: FBgn0031273, Exon: Exon, Gene: FBgn0031273, Misc. feature: contig 2L_1_13 1..50000(1), mRNA: FBgn0031273	FBpp0077664:c.1240A>G	FBpp0077664:p.Lys414Glu
2L mapping	626904	SNV	1	A	T	93	50.5376	21.6383	CDS: FBgn0031273, Exon: Exon, Gene: FBgn0031273, Misc. feature: contig 2L_1_13 1..50000(1), mRNA: FBgn0031273	FBpp0077664:c.1242A>T	FBpp0077664:p.Lys414Asn
2L mapping	626910	SNV	1	A	G	99	62.6263	33.871	CDS: FBgn0031273, Exon: Exon, Gene: FBgn0031273, Misc. feature: contig 2L_1_13 1..50000(1), mRNA: FBgn0031273	FBpp0077664:c.1248A>G
2L mapping	626914	Insertion	2	-	TG	99	57.5758	30.1053	CDS: FBgn0031273, Exon: Exon, Gene: FBgn0031273, Misc. feature: contig 2L_1_13 1..50000(1), mRNA: FBgn0031273	FBpp0077664:c.1251_1252insTG	FBpp0077664:p.Arg418fs
2L mapping	626932	Insertion	2	-	TG	104	49.0385	31.0882	CDS: FBgn0031273, Exon: Exon, Gene: FBgn0031273, Misc. feature: contig 2L_1_13 1..50000(1), mRNA: FBgn0031273	FBpp0077664:c.1269_1270insTG	FBpp0077664:p.Arg424fs
2L mapping	626940	SNV	1	A	T	93	39.7849	31.8108	CDS: FBgn0031273, Exon: Exon, Gene: FBgn0031273, Misc. feature: contig 2L_1_13 1..50000(1), mRNA: FBgn0031273	FBpp0077664:c.1278A>T	FBpp0077664:p.Glu426Asp
2L mapping	626943	Deletion	1	G	-	87	42.5287	34.1351	CDS: FBgn0031273, Exon: Exon, Gene: FBgn0031273, Misc. feature: contig 2L_1_13 1..50000(1), mRNA: FBgn0031273	FBpp0077664:c.1281delG	FBpp0077664:p.Glu428fs
2L mapping	626947	SNV	1	A	G	78	47.4359	34.4595	CDS: FBgn0031273, Exon: Exon, Gene: FBgn0031273, Misc. feature: contig 2L_1_13 1..50000(1), mRNA: FBgn0031273	FBpp0077664:c.1285A>G	FBpp0077664:p.Lys429Glu
2L mapping	627418	SNV	1	A	G	41	41.4634	29.9412	CDS: FBgn0031273, Exon: Exon, Gene: FBgn0031273, Misc. feature: contig 2L_1_13 1..50000(1), mRNA: FBgn0031273	FBpp0077664:c.1756A>G	FBpp0077664:p.Arg586Gly
2L mapping	627426	SNV	1	G	A	41	56.0976	35.2609	CDS: FBgn0031273, Exon: Exon, Gene: FBgn0031273, Misc. feature: contig 2L_1_13 1..50000(1), mRNA: FBgn0031273	FBpp0077664:c.1764G>A
2L mapping	627448	Deletion	2	GA	-	46	45.6522	33.9524	CDS: FBgn0031273, Exon: Exon, Gene: FBgn0031273, Misc. feature: contig 2L_1_13 1..50000(1), mRNA: FBgn0031273	FBpp0077664:c.1786_1787delGA	FBpp0077664:p.Glu596fs
2L mapping	627469	Insertion	1	-	G	53	43.3962	31.2609	CDS: FBgn0031273, Exon: Exon, Gene: FBgn0031273, Misc. feature: contig 2L_1_13 1..50000(1), mRNA: FBgn0031273	FBpp0077664:c.1806_1807insG	FBpp0077664:p.Arg603fs
2L mapping	627476	Deletion	1	G	-	46	41.3043	33	CDS: FBgn0031273, Exon: Exon, Gene: FBgn0031273, Misc. feature: contig 2L_1_13 1..50000(1), mRNA: FBgn0031273	FBpp0077664:c.1814delG	FBpp0077664:p.Arg605fs
2L mapping	627478	Deletion	1	G	-	46	41.3043	30.1053	CDS: FBgn0031273, Exon: Exon, Gene: FBgn0031273, Misc. feature: contig 2L_1_13 1..50000(1), mRNA: FBgn0031273	FBpp0077664:c.1816delG	FBpp0077664:p.Glu606fs
2L mapping	627484	Deletion	2	GA	-	45	55.5556	32.6	CDS: FBgn0031273, Exon: Exon, Gene: FBgn0031273, Misc. feature: contig 2L_1_13 1..50000(1), mRNA: FBgn0031273	FBpp0077664:c.1822_1823delGA	FBpp0077664:p.Glu608fs
2L mapping	627490	SNV	1	A	G	45	42.2222	32.4211	CDS: FBgn0031273, Exon: Exon, Gene: FBgn0031273, Misc. feature: contig 2L_1_13 1..50000(1), mRNA: FBgn0031273	FBpp0077664:c.1828A>G	FBpp0077664:p.Arg610Gly
2L mapping	627501	Replacement	2	GG	A	41	48.7805	30.925	CDS: FBgn0031273, Exon: Exon, Gene: FBgn0031273, Misc. feature: contig 2L_1_13 1..50000(1), mRNA: FBgn0031273	FBpp0077664:c.1839_1840delGGinsA	FBpp0077664:p.Glu614fs
2L mapping	627507	Deletion	1	A	-	41	43.9024	36.5556	CDS: FBgn0031273, Exon: Exon, Gene: FBgn0031273, Misc. feature: contig 2L_1_13 1..50000(1), mRNA: FBgn0031273	FBpp0077664:c.1845delA	FBpp0077664:p.Arg616fs
2L mapping	627527	SNV	1	G	A	25	40	36.6	CDS: FBgn0031273, Exon: Exon, Gene: FBgn0031273, Misc. feature: contig 2L_1_13 1..50000(1), mRNA: FBgn0031273	FBpp0077664:c.1865G>A	FBpp0077664:p.Arg622Lys
2L mapping	627741	SNV	1	A	G	30	40	30.9167	CDS: FBgn0031273, Exon: Exon, Gene: FBgn0031273, Misc. feature: contig 2L_1_13 1..50000(1), mRNA: FBgn0031273	FBpp0077664:c.2079A>G
2L mapping	627746	Insertion	1	-	G	28	35.7143	32.4	CDS: FBgn0031273, Exon: Exon, Gene: FBgn0031273, Misc. feature: contig 2L_1_13 1..50000(1), mRNA: FBgn0031273	FBpp0077664:c.2083_2084insG	FBpp0077664:p.Lys695fs
2L mapping	627748	SNV	1	A	G	29	58.6207	35.4118	CDS: FBgn0031273, Exon: Exon, Gene: FBgn0031273, Misc. feature: contig 2L_1_13 1..50000(1), mRNA: FBgn0031273	FBpp0077664:c.2086A>G	FBpp0077664:p.Lys696Glu
2L mapping	627753	Deletion	1	G	-	30	40	34.25	CDS: FBgn0031273, Exon: Exon, Gene: FBgn0031273, Misc. feature: contig 2L_1_13 1..50000(1), mRNA: FBgn0031273	FBpp0077664:c.2091delG	FBpp0077664:p.Glu698fs
2L mapping	627756	Deletion	1	G	-	30	36.6667	34.6364	CDS: FBgn0031273, Exon: Exon, Gene: FBgn0031273, Misc. feature: contig 2L_1_13 1..50000(1), mRNA: FBgn0031273	FBpp0077664:c.2094delG	FBpp0077664:p.Arg699fs
2L mapping	627789	SNV	1	T	G	15	80	32.5833	CDS: FBgn0031273, Exon: Exon, Gene: FBgn0031273, Misc. feature: contig 2L_1_13 1..50000(1), mRNA: FBgn0031273	FBpp0077664:c.2127T>G	FBpp0077664:p.Asp709Glu
2L mapping	628260	SNV	1	T	A	26	100	34.3846	Misc. feature: contig 2L_1_13 1..50000(1)
2L mapping	628426	SNV	1	G	C	14	100	36.4286	Misc. feature: contig 2L_1_13 1..50000(1)
2L mapping	628454	Deletion	8	ACATTGCG	-	12	75	31.8889	Misc. feature: contig 2L_1_13 1..50000(1)
2L mapping	628670	SNV	1	C	T	21	100	35.2381	Misc. feature: contig 2L_1_13 1..50000(1)
2L mapping	628725	SNV	1	A	T	18	100	33.1111	Misc. feature: contig 2L_1_13 1..50000(1)
2L mapping	628799	SNV	1	T	C	14	100	32.7143	Misc. RNA: FBgn0266909, Exon: Exon, Gene: FBgn0266909, Misc. feature: contig 2L_1_13 1..50000(1)
2L mapping	629060	SNV	1	T	A	27	100	33.9259	Misc. feature: contig 2L_1_13 1..50000(1)
2L mapping	630256	SNV	1	G	T	23	100	33.5217	Misc. feature: contig 2L_1_13 1..50000(1)
2L mapping	630297	SNV	1	C	T	22	100	33.8182	Misc. feature: contig 2L_1_13 1..50000(1)
2L mapping	630311	MNV	2	GT	CG	26	100	35.9038	Misc. feature: contig 2L_1_13 1..50000(1)
2L mapping	630342	SNV	1	G	A	29	100	35.7241	Misc. feature: contig 2L_1_13 1..50000(1)
2L mapping	630347	SNV	1	G	A	30	100	36.0333	Misc. feature: contig 2L_1_13 1..50000(1)
2L mapping	630361	SNV	1	A	G	26	100	35.2692	Misc. feature: contig 2L_1_13 1..50000(1)
2L mapping	630423	SNV	1	A	C	25	100	33.52	Misc. feature: contig 2L_1_13 1..50000(1)
2L mapping	630452	Deletion	1	T	-	25	80	32.85	Misc. feature: contig 2L_1_13 1..50000(1)
2L mapping	630539	SNV	1	T	A	27	100	35.1111	Misc. feature: contig 2L_1_13 1..50000(1)
2L mapping	630614	SNV	1	G	A	22	100	33.5455	Misc. feature: contig 2L_1_13 1..50000(1)
2L mapping	631286	Deletion	6	AAAAAA	-	19	68.4211	31.4615	Misc. feature: contig 2L_1_13 1..50000(1)
2L mapping	631293	SNV	1	A	C	13	100	34.0769	Misc. feature: contig 2L_1_13 1..50000(1)
2L mapping	631295	Deletion	2	TA	-	13	100	35.1538	Misc. feature: contig 2L_1_13 1..50000(1)
2L mapping	631510	SNV	1	G	A	14	100	33.7143	Misc. feature: contig 2L_1_13 1..50000(1)
2L mapping	631583	Insertion	7	-	TCCATAC	20	60	34.5238	Misc. feature: contig 2L_1_13 1..50000(1)
2L mapping	632018	SNV	1	G	T	18	100	32.3889	Misc. feature: contig 2L_1_13 1..50000(1)
2L mapping	632167	SNV	1	C	T	34	100	36	Misc. feature: contig 2L_1_13 1..50000(1)
2L mapping	632278	Deletion	9	GAATCTTGT	-	25	48	32.1667	Misc. feature: contig 2L_1_13 1..50000(1)
2L mapping	632337	SNV	1	C	G	24	100	32.6667	Misc. feature: contig 2L_1_13 1..50000(1)
2L mapping	632345	SNV	1	T	A	28	100	35.3929	Misc. feature: contig 2L_1_13 1..50000(1)
2L mapping	632349	SNV	1	G	A	27	100	34.4815	Misc. feature: contig 2L_1_13 1..50000(1)
2L mapping	632354	SNV	1	C	T	26	100	35.6923	Misc. feature: contig 2L_1_13 1..50000(1)
2L mapping	632356	SNV	1	A	C	26	100	36.2308	Misc. feature: contig 2L_1_13 1..50000(1)
2L mapping	632358	SNV	1	T	G	26	100	35.2692	Misc. feature: contig 2L_1_13 1..50000(1)
2L mapping	632406	SNV	1	A	G	33	96.9697	35.0625	Misc. feature: contig 2L_1_13 1..50000(1)
2L mapping	632409	SNV	1	C	T	33	100	34.9091	Misc. feature: contig 2L_1_13 1..50000(1)
2L mapping	632416	SNV	1	T	G	33	100	33.6061	Misc. feature: contig 2L_1_13 1..50000(1)
2L mapping	632437	MNV	2	AG	CA	27	100	35.5556	Misc. feature: contig 2L_1_13 1..50000(1)
2L mapping	632459	Insertion	1	-	G	26	92.3077	31.4583	Misc. feature: contig 2L_1_13 1..50000(1)
2L mapping	632461	SNV	1	T	C	26	92.3077	34.5	Misc. feature: contig 2L_1_13 1..50000(1)
2L mapping	632470	SNV	1	A	G	24	100	31	Misc. feature: contig 2L_1_13 1..50000(1)
2L mapping	632484	SNV	1	C	T	23	100	36.3043	Misc. feature: contig 2L_1_13 1..50000(1)
2L mapping	632750	SNV	1	C	A	22	100	36.1818	Misc. feature: contig 2L_1_13 1..50000(1)
2L mapping	632763	Deletion	4	TTTT	-	20	55	34.5455	Misc. feature: contig 2L_1_13 1..50000(1)
2L mapping	632764	SNV	1	T	G	20	40	37	Misc. feature: contig 2L_1_13 1..50000(1)
2L mapping	632768	SNV	1	T	G	18	61.1111	37	Misc. feature: contig 2L_1_13 1..50000(1)
2L mapping	632798	SNV	1	T	A	13	100	33.3846	Misc. feature: contig 2L_1_13 1..50000(1)
2L mapping	632854	SNV	1	G	A	17	100	31.2941	Misc. feature: contig 2L_1_13 1..50000(1)
2L mapping	632868	SNV	1	G	C	24	100	35.125	Misc. feature: contig 2L_1_13 1..50000(1)
2L mapping	633098	SNV	1	C	T	28	100	32.8929	Misc. feature: contig 2L_1_13 1..50000(1)
2L mapping	634224	SNV	1	T	C	14	100	36.4286	Misc. feature: contig 2L_1_13 1..50000(1)
2L mapping	634253	Deletion	4	AAAG	-	16	62.5	36.6	Misc. feature: contig 2L_1_13 1..50000(1)
2L mapping	634306	SNV	1	T	C	20	100	35.3	Misc. feature: contig 2L_1_13 1..50000(1)
2L mapping	634316	SNV	1	G	A	20	95	34.0526	Misc. feature: contig 2L_1_13 1..50000(1)
2L mapping	634344	Insertion	1	-	A	17	88.2353	36.3333	Misc. feature: contig 2L_1_13 1..50000(1)
2L mapping	634349	SNV	1	T	G	15	100	34.9333	Misc. feature: contig 2L_1_13 1..50000(1)
2L mapping	634373	MNV	2	GT	AC	12	100	35.2917	Misc. feature: contig 2L_1_13 1..50000(1)
2L mapping	634480	SNV	1	A	G	13	100	33.4615	Misc. feature: contig 2L_1_13 1..50000(1)
2L mapping	634901	SNV	1	T	C	21	100	35.6667	Misc. feature: contig 2L_1_13 1..50000(1)
2L mapping	635600	MNV	2	TA	GC	17	100	30.8529	Misc. feature: contig 2L_1_13 1..50000(1)
2L mapping	635987	Insertion	1	-	A	15	46.6667	32.2857	Misc. feature: contig 2L_1_13 1..50000(1)
2L mapping	636635	SNV	1	G	A	10	100	36.6	Misc. feature: contig 2L_1_13 1..50000(1)
2L mapping	636644	SNV	1	A	T	10	100	34.8	Misc. feature: contig 2L_1_13 1..50000(1)
2L mapping	636648	SNV	1	C	T	10	100	35.1	Misc. feature: contig 2L_1_13 1..50000(1)
2L mapping	636677	SNV	1	A	C	14	100	32.4286	Misc. feature: contig 2L_1_13 1..50000(1)
2L mapping	636708	SNV	1	C	A	13	100	33.8462	Misc. feature: contig 2L_1_13 1..50000(1)
2L mapping	636745	SNV	1	A	C	12	83.3333	31.4	Misc. feature: contig 2L_1_13 1..50000(1)
2L mapping	637066	SNV	1	G	T	17	41.1765	33	Misc. feature: contig 2L_1_13 1..50000(1)
2L mapping	637067	SNV	1	T	G	17	58.8235	33.9	Misc. feature: contig 2L_1_13 1..50000(1)
2L mapping	637545	SNV	1	A	T	10	100	31.2	Misc. feature: contig 2L_1_13 1..50000(1)
2L mapping	637767	SNV	1	G	A	10	100	31.2	Misc. feature: contig 2L_1_13 1..50000(1)
2L mapping	638256	SNV	1	G	T	11	100	35.3636	Misc. feature: contig 2L_1_13 1..50000(1)
2L mapping	638264	SNV	1	A	G	12	100	34.8333	Misc. feature: contig 2L_1_13 1..50000(1)
2L mapping	638334	SNV	1	T	C	23	100	33.8696	Misc. feature: contig 2L_1_13 1..50000(1)
2L mapping	638419	SNV	1	G	C	11	100	35.2727	Misc. feature: contig 2L_1_13 1..50000(1)
2L mapping	638429	SNV	1	C	G	10	100	36.2	Misc. feature: contig 2L_1_13 1..50000(1)
2L mapping	638442	SNV	1	G	T	12	100	36.3333	Misc. feature: contig 2L_1_13 1..50000(1)
2L mapping	638963	SNV	1	T	C	17	100	31.3529	Misc. feature: contig 2L_1_13 1..50000(1)
2L mapping	639269	SNV	1	G	A	18	100	35.1667	Misc. feature: contig 2L_1_13 1..50000(1)
2L mapping	639330	SNV	1	A	T	18	100	36.2222	Misc. feature: contig 2L_1_13 1..50000(1)
2L mapping	639464	SNV	1	T	A	16	100	34.4375	Misc. feature: contig 2L_1_13 1..50000(1)
2L mapping	639735	SNV	1	A	G	18	100	32.6667	Misc. feature: contig 2L_1_13 1..50000(1)
2L mapping	639768	SNV	1	A	G	15	93.3333	32.7143	Misc. feature: contig 2L_1_13 1..50000(1)
2L mapping	639779	Insertion	6	-	CAGCAC	13	38.4615	35.2333	Misc. feature: contig 2L_1_13 1..50000(1)
2L mapping	639879	SNV	1	C	A	16	100	34.6875	Misc. feature: contig 2L_1_13 1..50000(1)
2L mapping	639887	SNV	1	C	A	16	100	35.625	Misc. feature: contig 2L_1_13 1..50000(1)
2L mapping	639895	MNV	2	CC	TT	12	100	34.7083	Misc. feature: contig 2L_1_13 1..50000(1)
2L mapping	639922	SNV	1	A	G	15	53.3333	37	Misc. feature: contig 2L_1_13 1..50000(1)
2L mapping	639964	SNV	1	T	G	10	100	36.6	Misc. feature: contig 2L_1_13 1..50000(1)
2L mapping	640019	SNV	1	T	G	16	100	36.75	Exon: Exon, Gene: FBgn0000497, Misc. feature: contig 2L_1_13 1..50000(1), mRNA: FBgn0000497
2L mapping	640496	SNV	1	T	G	18	100	35.7778	Exon: Exon, Exon: Exon, Gene: FBgn0000497, Misc. feature: contig 2L_1_13 1..50000(1), mRNA: FBgn0000497, mRNA: FBgn0000497
2L mapping	640515	SNV	1	A	T	18	100	34.5	Exon: Exon, Exon: Exon, Gene: FBgn0000497, Misc. feature: contig 2L_1_13 1..50000(1), mRNA: FBgn0000497, mRNA: FBgn0000497
2L mapping	640587	SNV	1	T	C	19	100	32.3158	Exon: Exon, Exon: Exon, Gene: FBgn0000497, Misc. feature: contig 2L_1_13 1..50000(1), mRNA: FBgn0000497, mRNA: FBgn0000497
2L mapping	640803	SNV	1	C	T	23	100	36.3913	Exon: Exon, Exon: Exon, Gene: FBgn0000497, Misc. feature: contig 2L_1_13 1..50000(1), mRNA: FBgn0000497, mRNA: FBgn0000497
2L mapping	640866	SNV	1	A	T	26	100	30.4615	Exon: Exon, Exon: Exon, Gene: FBgn0000497, Misc. feature: contig 2L_1_13 1..50000(1), mRNA: FBgn0000497, mRNA: FBgn0000497
2L mapping	641421	SNV	1	G	C	12	100	32.8333	CDS: FBgn0000497, CDS: FBgn0000497, Exon: Exon, Exon: Exon, Gene: FBgn0000497, Misc. feature: contig 2L_1_13 1..50000(1), mRNA: FBgn0000497, mRNA: FBgn0000497	FBpp0077708:c.[10209C>G]; FBpp0309926:c.[10209C>G]
2L mapping	641474	SNV	1	C	T	11	54.5455	29.3333	CDS: FBgn0000497, CDS: FBgn0000497, Exon: Exon, Exon: Exon, Gene: FBgn0000497, Misc. feature: contig 2L_1_13 1..50000(1), mRNA: FBgn0000497, mRNA: FBgn0000497	FBpp0077708:c.[10156G>A]; FBpp0309926:c.[10156G>A]	FBpp0077708:p.[Asp3386Asn]; FBpp0309926:p.[Asp3386Asn]
2L mapping	641589	SNV	1	G	A	13	100	33.8462	CDS: FBgn0000497, CDS: FBgn0000497, Exon: Exon, Exon: Exon, Gene: FBgn0000497, Misc. feature: contig 2L_1_13 1..50000(1), mRNA: FBgn0000497, mRNA: FBgn0000497	FBpp0309926:c.[10041C>T]; FBpp0077708:c.[10041C>T]
2L mapping	641613	SNV	1	T	G	12	100	36.3333	CDS: FBgn0000497, CDS: FBgn0000497, Exon: Exon, Exon: Exon, Gene: FBgn0000497, Misc. feature: contig 2L_1_13 1..50000(1), mRNA: FBgn0000497, mRNA: FBgn0000497	FBpp0077708:c.[10017A>C]; FBpp0309926:c.[10017A>C]
2L mapping	641802	SNV	1	A	G	11	100	31.9091	CDS: FBgn0000497, CDS: FBgn0000497, Exon: Exon, Exon: Exon, Gene: FBgn0000497, Misc. feature: contig 2L_1_13 1..50000(1), mRNA: FBgn0000497, mRNA: FBgn0000497	FBpp0077708:c.[9828T>C]; FBpp0309926:c.[9828T>C]
2L mapping	641937	SNV	1	T	C	13	100	34	CDS: FBgn0000497, CDS: FBgn0000497, Exon: Exon, Exon: Exon, Gene: FBgn0000497, Misc. feature: contig 2L_1_13 1..50000(1), mRNA: FBgn0000497, mRNA: FBgn0000497	FBpp0309926:c.[9693A>G]; FBpp0077708:c.[9693A>G]
2L mapping	642195	SNV	1	G	A	14	100	32.9286	CDS: FBgn0000497, CDS: FBgn0000497, Exon: Exon, Exon: Exon, Gene: FBgn0000497, Misc. feature: contig 2L_1_13 1..50000(1), mRNA: FBgn0000497, mRNA: FBgn0000497	FBpp0309926:c.[9435C>T]; FBpp0077708:c.[9435C>T]
2L mapping	642204	SNV	1	G	T	15	100	36.2	CDS: FBgn0000497, CDS: FBgn0000497, Exon: Exon, Exon: Exon, Gene: FBgn0000497, Misc. feature: contig 2L_1_13 1..50000(1), mRNA: FBgn0000497, mRNA: FBgn0000497	FBpp0077708:c.[9426C>A]; FBpp0309926:c.[9426C>A]
2L mapping	642249	SNV	1	A	C	12	100	35.3333	CDS: FBgn0000497, CDS: FBgn0000497, Exon: Exon, Exon: Exon, Gene: FBgn0000497, Misc. feature: contig 2L_1_13 1..50000(1), mRNA: FBgn0000497, mRNA: FBgn0000497	FBpp0309926:c.[9381T>G]; FBpp0077708:c.[9381T>G]
2L mapping	642260	SNV	1	T	G	13	92.3077	33.4167	CDS: FBgn0000497, CDS: FBgn0000497, Exon: Exon, Exon: Exon, Gene: FBgn0000497, Misc. feature: contig 2L_1_13 1..50000(1), mRNA: FBgn0000497, mRNA: FBgn0000497	FBpp0077708:c.[9370A>C]; FBpp0309926:c.[9370A>C]
2L mapping	642359	SNV	1	T	C	14	100	35.6429	CDS: FBgn0000497, CDS: FBgn0000497, Exon: Exon, Exon: Exon, Gene: FBgn0000497, Misc. feature: contig 2L_1_13 1..50000(1), mRNA: FBgn0000497, mRNA: FBgn0000497	FBpp0309926:c.[9271A>G]; FBpp0077708:c.[9271A>G]	FBpp0309926:p.[Ser3091Gly]; FBpp0077708:p.[Ser3091Gly]
2L mapping	642678	SNV	1	T	C	13	100	31.0769	CDS: FBgn0000497, CDS: FBgn0000497, Exon: Exon, Exon: Exon, Gene: FBgn0000497, Misc. feature: contig 2L_1_13 1..50000(1), mRNA: FBgn0000497, mRNA: FBgn0000497	FBpp0077708:c.[8952A>G]; FBpp0309926:c.[8952A>G]
2L mapping	642886	SNV	1	C	T	21	100	34.6667	CDS: FBgn0000497, CDS: FBgn0000497, Exon: Exon, Exon: Exon, Gene: FBgn0000497, Misc. feature: contig 2L_1_13 1..50000(1), mRNA: FBgn0000497, mRNA: FBgn0000497	FBpp0309926:c.[8744G>A]; FBpp0077708:c.[8744G>A]	FBpp0309926:p.[Arg2915Gln]; FBpp0077708:p.[Arg2915Gln]
2L mapping	642969	SNV	1	A	G	22	100	35.5	CDS: FBgn0000497, CDS: FBgn0000497, Exon: Exon, Exon: Exon, Gene: FBgn0000497, Misc. feature: contig 2L_1_13 1..50000(1), mRNA: FBgn0000497, mRNA: FBgn0000497	FBpp0077708:c.[8661T>C]; FBpp0309926:c.[8661T>C]
2L mapping	643143	SNV	1	T	C	11	100	36.2727	CDS: FBgn0000497, CDS: FBgn0000497, Exon: Exon, Exon: Exon, Gene: FBgn0000497, Misc. feature: contig 2L_1_13 1..50000(1), mRNA: FBgn0000497, mRNA: FBgn0000497	FBpp0077708:c.[8487A>G]; FBpp0309926:c.[8487A>G]
2L mapping	643325	SNV	1	G	T	12	91.6667	35.3636	CDS: FBgn0000497, CDS: FBgn0000497, Exon: Exon, Exon: Exon, Gene: FBgn0000497, Misc. feature: contig 2L_1_13 1..50000(1), mRNA: FBgn0000497, mRNA: FBgn0000497	FBpp0309926:c.[8305C>A]; FBpp0077708:c.[8305C>A]
2L mapping	643521	SNV	1	G	A	18	100	33.1111	CDS: FBgn0000497, CDS: FBgn0000497, Exon: Exon, Exon: Exon, Gene: FBgn0000497, Misc. feature: contig 2L_1_13 1..50000(1), mRNA: FBgn0000497, mRNA: FBgn0000497	FBpp0077708:c.[8109C>T]; FBpp0309926:c.[8109C>T]
2L mapping	643864	SNV	1	C	G	19	100	36.2632	CDS: FBgn0000497, CDS: FBgn0000497, Exon: Exon, Exon: Exon, Gene: FBgn0000497, Misc. feature: contig 2L_1_13 1..50000(1), mRNA: FBgn0000497, mRNA: FBgn0000497	FBpp0309926:c.[7766G>C]; FBpp0077708:c.[7766G>C]	FBpp0309926:p.[Ser2589Thr]; FBpp0077708:p.[Ser2589Thr]
2L mapping	644368	SNV	1	T	C	19	100	33.9474	Gene: FBgn0000497, Misc. feature: contig 2L_1_13 1..50000(1)	FBpp0309926:c.[7316-54A>G]; FBpp0077708:c.[7316-54A>G]
2L mapping	644447	SNV	1	T	A	15	100	31.6667	CDS: FBgn0000497, CDS: FBgn0000497, Exon: Exon, Gene: FBgn0000497, Misc. feature: contig 2L_1_13 1..50000(1), mRNA: FBgn0000497, mRNA: FBgn0000497	FBpp0309926:c.[7305A>T]; FBpp0077708:c.[7305A>T]
2L mapping	644507	SNV	1	T	C	11	100	31.7273	CDS: FBgn0000497, CDS: FBgn0000497, Exon: Exon, Gene: FBgn0000497, Misc. feature: contig 2L_1_13 1..50000(1), mRNA: FBgn0000497, mRNA: FBgn0000497	FBpp0077708:c.[7245A>G]; FBpp0309926:c.[7245A>G]
2L mapping	644588	SNV	1	C	T	18	100	34.6667	CDS: FBgn0000497, CDS: FBgn0000497, Exon: Exon, Gene: FBgn0000497, Misc. feature: contig 2L_1_13 1..50000(1), mRNA: FBgn0000497, mRNA: FBgn0000497	FBpp0077708:c.[7164G>A]; FBpp0309926:c.[7164G>A]
2L mapping	644684	SNV	1	A	C	22	100	33.7273	CDS: FBgn0000497, CDS: FBgn0000497, Exon: Exon, Gene: FBgn0000497, Misc. feature: contig 2L_1_13 1..50000(1), mRNA: FBgn0000497, mRNA: FBgn0000497	FBpp0077708:c.[7068T>G]; FBpp0309926:c.[7068T>G]
2L mapping	644693	SNV	1	G	T	21	100	34.9524	CDS: FBgn0000497, CDS: FBgn0000497, Exon: Exon, Gene: FBgn0000497, Misc. feature: contig 2L_1_13 1..50000(1), mRNA: FBgn0000497, mRNA: FBgn0000497	FBpp0309926:c.[7059C>A]; FBpp0077708:c.[7059C>A]
2L mapping	644728	SNV	1	C	A	17	100	36.0588	CDS: FBgn0000497, CDS: FBgn0000497, Exon: Exon, Gene: FBgn0000497, Misc. feature: contig 2L_1_13 1..50000(1), mRNA: FBgn0000497, mRNA: FBgn0000497	FBpp0077708:c.[7024G>T]; FBpp0309926:c.[7024G>T]	FBpp0077708:p.[Ala2342Ser]; FBpp0309926:p.[Ala2342Ser]
2L mapping	645245	SNV	1	C	T	14	100	36.4286	CDS: FBgn0000497, CDS: FBgn0000497, Exon: Exon, Gene: FBgn0000497, Misc. feature: contig 2L_1_13 1..50000(1), mRNA: FBgn0000497, mRNA: FBgn0000497	FBpp0077708:c.[6507G>A]; FBpp0309926:c.[6507G>A]
2L mapping	645251	SNV	1	C	T	14	100	33.9286	CDS: FBgn0000497, CDS: FBgn0000497, Exon: Exon, Gene: FBgn0000497, Misc. feature: contig 2L_1_13 1..50000(1), mRNA: FBgn0000497, mRNA: FBgn0000497	FBpp0077708:c.[6501G>A]; FBpp0309926:c.[6501G>A]
2L mapping	645508	SNV	1	G	T	14	100	36.7143	CDS: FBgn0000497, CDS: FBgn0000497, Exon: Exon, Gene: FBgn0000497, Misc. feature: contig 2L_1_13 1..50000(1), mRNA: FBgn0000497, mRNA: FBgn0000497	FBpp0077708:c.[6244C>A]; FBpp0309926:c.[6244C>A]	FBpp0077708:p.[Leu2082Ile]; FBpp0309926:p.[Leu2082Ile]
2L mapping	646478	SNV	1	C	T	16	100	34.0625	Gene: FBgn0000497, Misc. feature: contig 2L_1_13 1..50000(1)	FBpp0309926:c.[6036-762G>A]; FBpp0077708:c.[6036-762G>A]
2L mapping	646529	SNV	1	C	T	13	100	35.9231	Gene: FBgn0000497, Misc. feature: contig 2L_1_13 1..50000(1)	FBpp0077708:c.[6036-813G>A]; FBpp0309926:c.[6036-813G>A]
2L mapping	646595	SNV	1	G	T	13	100	34.9231	Gene: FBgn0000497, Misc. feature: contig 2L_1_13 1..50000(1)	FBpp0309926:c.[6036-879C>A]; FBpp0077708:c.[6036-879C>A]
2L mapping	646645	SNV	1	T	A	14	100	35.3571	Gene: FBgn0000497, Misc. feature: contig 2L_1_13 1..50000(1)	FBpp0077708:c.[6036-929A>T]; FBpp0309926:c.[6036-929A>T]
2L mapping	646869	Insertion	1	-	A	16	87.5	33.5	Gene: FBgn0000497, Misc. feature: contig 2L_1_13 1..50000(1)	FBpp0309926:c.[6035+1120_6035+1121insT]; FBpp0077708:c.[6035+1120_6035+1121insT]
2L mapping	647095	SNV	1	T	A	23	100	34.9565	Gene: FBgn0000497, Misc. feature: contig 2L_1_13 1..50000(1)	FBpp0077708:c.[6035+894A>T]; FBpp0309926:c.[6035+894A>T]
2L mapping	647182	Deletion	1	G	-	20	90	28.6111	Gene: FBgn0000497, Misc. feature: contig 2L_1_13 1..50000(1)	FBpp0309926:c.[6035+807delC]; FBpp0077708:c.[6035+807delC]
2L mapping	647353	SNV	1	T	A	14	100	30.7857	Gene: FBgn0000497, Misc. feature: contig 2L_1_13 1..50000(1)	FBpp0309926:c.[6035+636A>T]; FBpp0077708:c.[6035+636A>T]
2L mapping	647366	SNV	1	T	G	17	100	30.2941	Gene: FBgn0000497, Misc. feature: contig 2L_1_13 1..50000(1)	FBpp0077708:c.[6035+623A>C]; FBpp0309926:c.[6035+623A>C]
2L mapping	647486	SNV	1	G	A	19	100	33	Gene: FBgn0000497, Misc. feature: contig 2L_1_13 1..50000(1)	FBpp0077708:c.[6035+503C>T]; FBpp0309926:c.[6035+503C>T]
2L mapping	647505	SNV	1	G	A	17	100	32.4118	Gene: FBgn0000497, Misc. feature: contig 2L_1_13 1..50000(1)	FBpp0309926:c.[6035+484C>T]; FBpp0077708:c.[6035+484C>T]
2L mapping	647511	SNV	1	G	A	17	100	32.4706	Gene: FBgn0000497, Misc. feature: contig 2L_1_13 1..50000(1)	FBpp0309926:c.[6035+478C>T]; FBpp0077708:c.[6035+478C>T]
2L mapping	647524	Deletion	1	G	-	14	78.5714	32	Gene: FBgn0000497, Misc. feature: contig 2L_1_13 1..50000(1)	FBpp0309926:c.[6035+465delC]; FBpp0077708:c.[6035+465delC]
2L mapping	647531	SNV	1	C	A	14	100	30.0714	Gene: FBgn0000497, Misc. feature: contig 2L_1_13 1..50000(1)	FBpp0077708:c.[6035+458G>T]; FBpp0309926:c.[6035+458G>T]
2L mapping	647540	SNV	1	G	T	13	100	29.6154	Gene: FBgn0000497, Misc. feature: contig 2L_1_13 1..50000(1)	FBpp0309926:c.[6035+449C>A]; FBpp0077708:c.[6035+449C>A]
2L mapping	647542	SNV	1	A	G	13	100	30.0769	Gene: FBgn0000497, Misc. feature: contig 2L_1_13 1..50000(1)	FBpp0077708:c.[6035+447T>C]; FBpp0309926:c.[6035+447T>C]
2L mapping	647584	SNV	1	G	A	14	92.8571	33.5385	Gene: FBgn0000497, Misc. feature: contig 2L_1_13 1..50000(1)	FBpp0077708:c.[6035+405C>T]; FBpp0309926:c.[6035+405C>T]
2L mapping	647607	SNV	1	A	G	19	100	33.6316	Gene: FBgn0000497, Misc. feature: contig 2L_1_13 1..50000(1)	FBpp0309926:c.[6035+382T>C]; FBpp0077708:c.[6035+382T>C]
2L mapping	647663	SNV	1	A	T	19	100	34.2105	Gene: FBgn0000497, Misc. feature: contig 2L_1_13 1..50000(1)	FBpp0077708:c.[6035+326T>A]; FBpp0309926:c.[6035+326T>A]
2L mapping	647716	SNV	1	A	G	10	100	35	Gene: FBgn0000497, Misc. feature: contig 2L_1_13 1..50000(1)	FBpp0309926:c.[6035+273T>C]; FBpp0077708:c.[6035+273T>C]
[truncated: 654,077+ more rows]
